# Supplementary material for: Population level analyses reveal contrasting landscapes of gene expression divergence and evolution between male and female transcriptome lineages in the house mouse
Source: Research Square preprint supplement (doi:10.21203/rs.3.rs-6634316/v1), 2025-05-22
Supplement: Supplementary file 1 [file 95a23fb6f210f42551519010.pdf]

## **Supplemental information for:**

### **Population level analyses reveal contrasting landscapes of gene expression divergence and evolution between male and female transcriptome lineages in the house mouse**

Kaizong Wei, Chen Xie, Aftab Ahmad, Lei Duan, Mingji Chu, Yuanxiao Gao, Diethard Tautz\*, and Wenyu Zhang\*

\*Corresponding to: [wyzhang@nwpu.edu.cn](mailto:wyzhang@nwpu.edu.cn) and [tautz@evolbio.mpg.de](mailto:tautz@evolbio.mpg.de)

#### **Supplemental Figures and Tables**

- **Figure S1** Sex- and organ-specific patterns of protein-coding gene expression divergence.
- **Figure S2** Sex- and organ-specific patterns of lncRNA gene expression divergence.
- **Figure S3** Comparative analysis of sex-specific gene expression evolution at inter-species comparison level.
- **Figure S4** Comparative analysis of sex-specific DE gene expression with a different DE gene analysis tool.
- **Figure S5** Organ-specific patterns of gene expression divergence in male transcriptome.
- **Figure S6** Distribution on the fraction of genes for three types of expression patterns.
- **Figure S7** Chromosomal distribution of genes for four types of expression patterns in inter-species comparisons.
- **Figure S8** Correlation between the numbers of input genes and (A) KEGG pathways and (B) GO BP terms.
- **Figure S9** Distribution on the number of functional enrichment terms across organs for sex-specific DE genes.
- **Table S1** Statistics on the functional enrichment terms of sex-specific DE genes.

#### **Other supplemental data files stored separately for this manuscript**

**Data S1** Summary information of RNA-Seq data used in this study.

**Data S2** Summary information of the number of genes with expression.

**Data S3** Summary information of transcriptomic distances based on the (A) first and (B) second RNA-Seq datasets.

**Data S4** Percentage of sex-biased genes in the four gene categories with distinct gene expression patterns.

**Data S5** Statistics on the chromosomal distributions of gene categories with different expression patterns.

**Data S6** Full list of significantly (A) enriched KEGG pathways and (B) GO BP terms of sex-specific DE genes.

**Data S7** Full list of DE (A) protein-coding genes and (B) lncRNA genes for the first RNA-Seq dataset.

**Data S8** Full list of DE (A) protein-coding genes and (B) lncRNA genes for the second RNA-Seq dataset.

**Data S9** Full list of sex-biased (A) protein-coding genes and (B) lncRNA genes for the first RNA-Seq dataset.

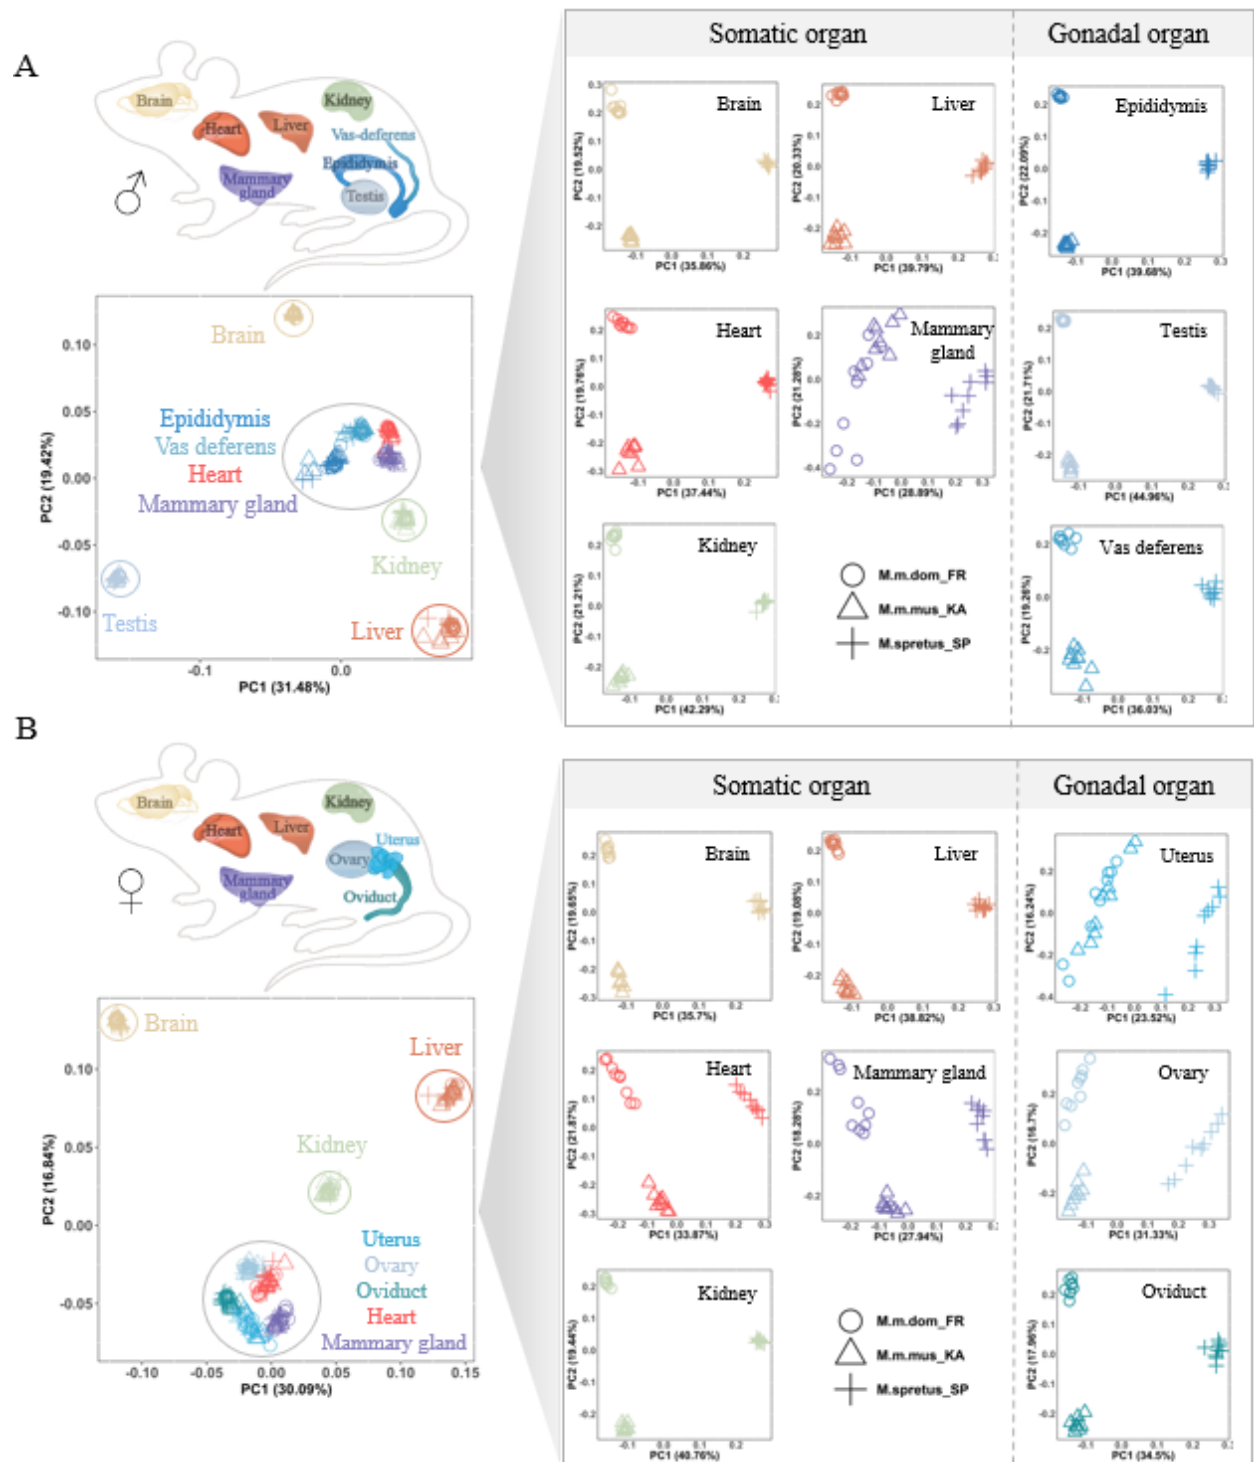

**Figure S1 Sex- and organ-specific patterns of protein-coding gene expression divergence.** Principal component analysis (PCA) of protein-coding gene expression profiles in (A) male and (B) female mice. Main panels display global clustering patterns across all organs, with insets showing organ-specific analyses. Principal components 1 and 2 (PC1/PC2) are shown, with variance explained indicated in axis labels.

A

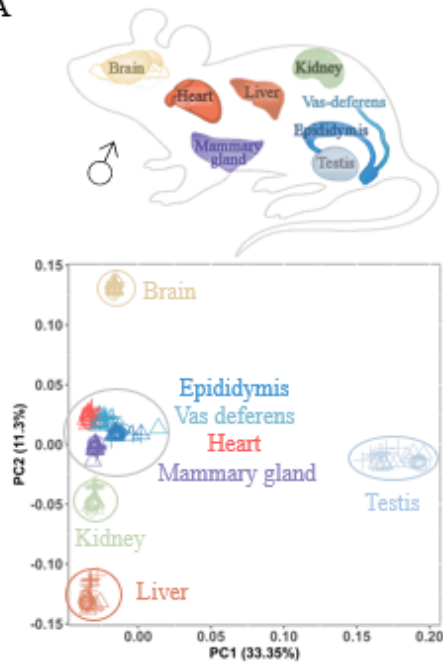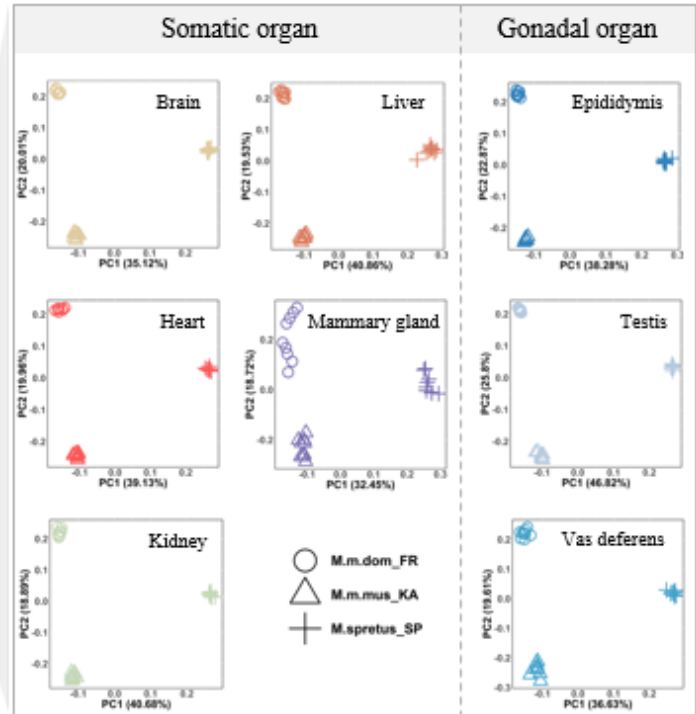

B

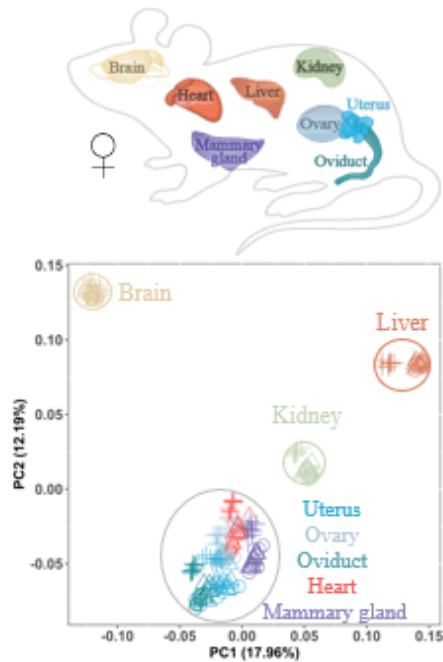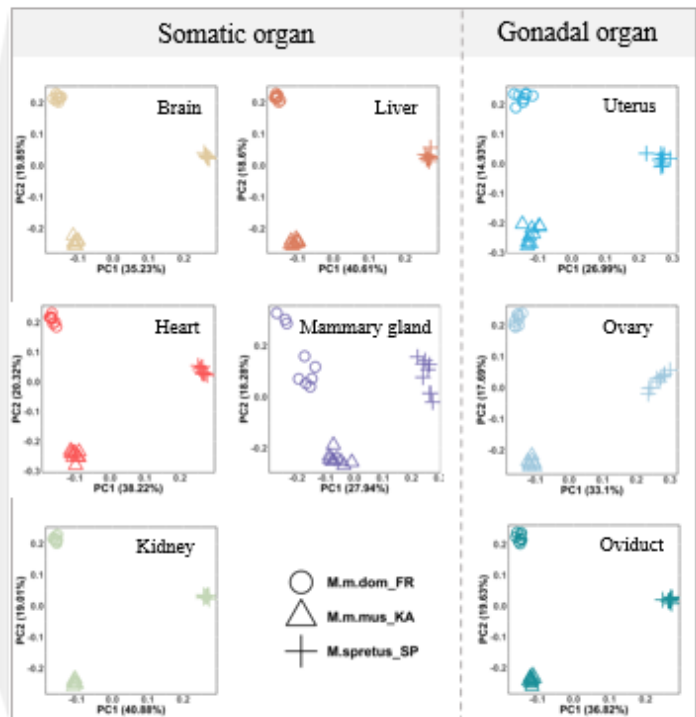

**Figure S2 Sex- and organ-specific patterns of lncRNA gene expression divergence.** Principal component analysis (PCA) of lncRNA gene expression profiles in (A) male and (B) female mice. Main panels display global clustering patterns across all organs, with insets showing organ-specific analyses. Principal components 1 and 2 (PC1/PC2) are shown, with variance explained indicated in axis labels.

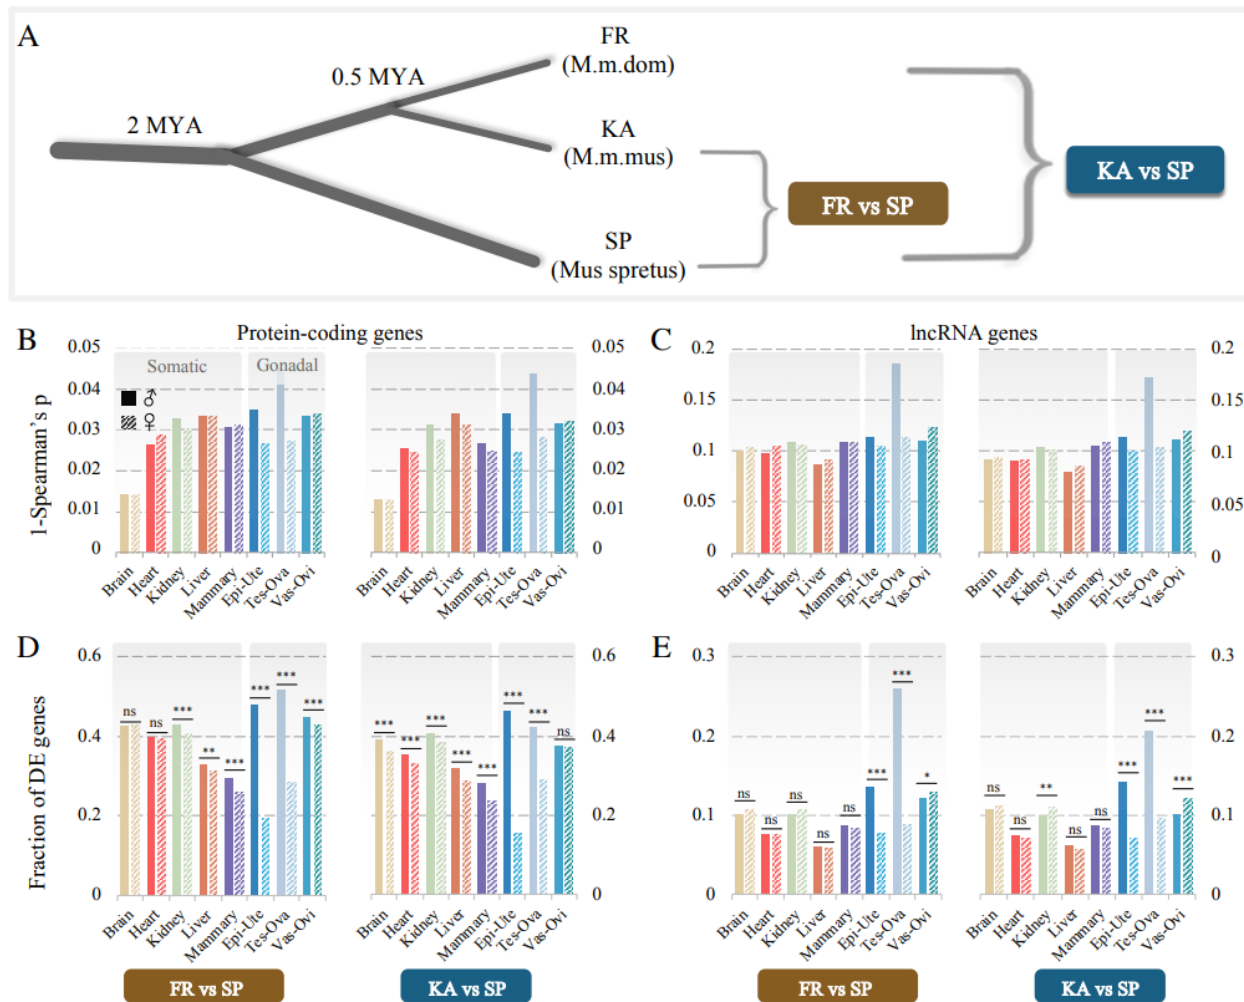

**Figure S3 Comparative analysis of sex-specific gene expression evolution at inter-species comparison level.** (A) Phylogenetic relationships and divergence times among three *Mus* taxa. Comparative analyses include FR vs SP and KA vs SP comparisons. Distributions of transcriptomic distance (1 - Spearman's rank correlation coefficient,  $\rho$ ) for (B) protein-coding genes and (C) long non-coding RNA (lncRNA) genes. Male and female organ data were visually differentiated using solid-filled and hatched bars, respectively. Fraction of differentially expressed (DE) genes (FDR  $\leq 0.05$ ) for (D) protein-coding genes and (E) lncRNA genes. Significance of sex differences in DE gene counts per organ was assessed by Fisher's exact test (\*\*\*: p-value  $\leq 0.001$ ; \*\*: p-value  $\leq 0.01$ ; \*: p-value  $\leq 0.05$ ; ns: p-value  $> 0.05$ ). DE gene analysis was performed using edgeR. Organ abbreviations follow Figure 2.

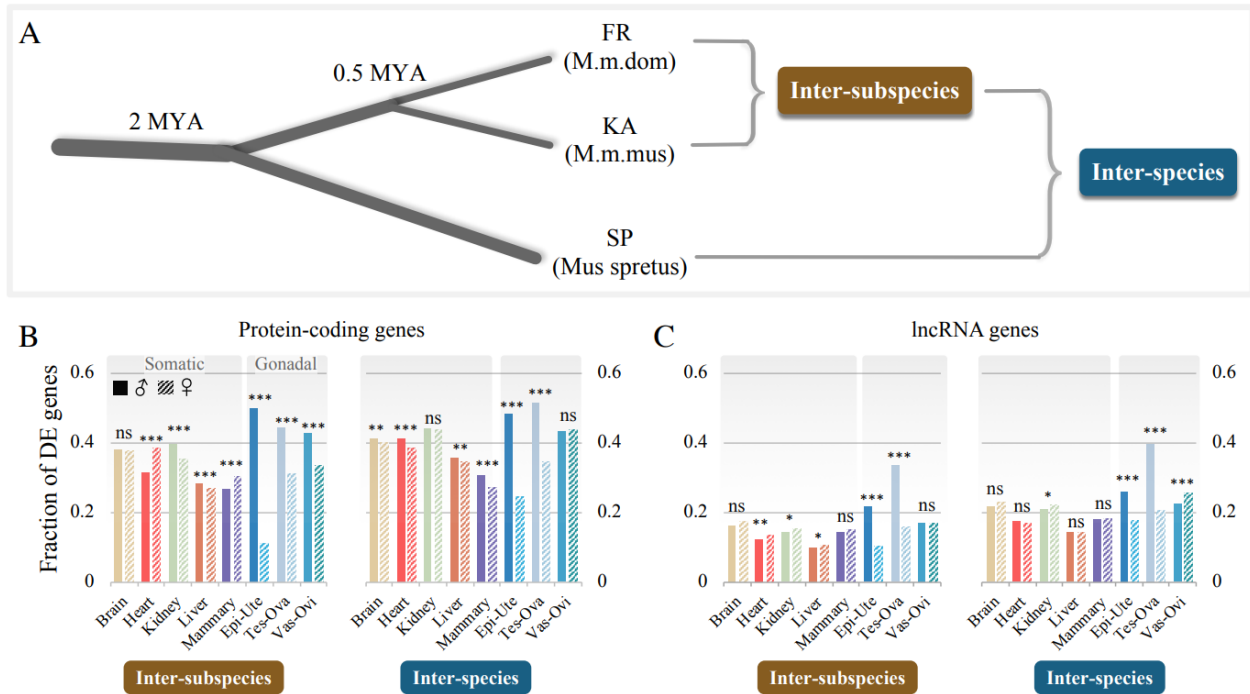

**Figure S4 Comparative analysis of sex-specific DE gene expression with a different DE gene analysis tool.** (A) Phylogenetic relationships and divergence times among three *Mus* taxa. Comparative analyses include inter-subspecies (*M. m. dom* versus *M. m. mus*) and inter-species (*Mus musculus* versus *Mus spretus*) comparisons. Differentially expressed (DE) gene counts (FDR  $\leq 0.05$ ) for (B) protein-coding genes and (C) lncRNA genes. DE analysis was performed using DESeq2. Male and female organ data were visually differentiated using solid-filled and hatched bars, respectively. Significance of sex differences in DE counts per organ was assessed by Fisher's exact test (\*\*\*: p-value  $\leq 0.001$ ; \*\*: p-value  $\leq 0.01$ ; \*: p-value  $\leq 0.05$ ; ns: p-value  $> 0.05$ ). Organ abbreviations follow Figure 2.

A

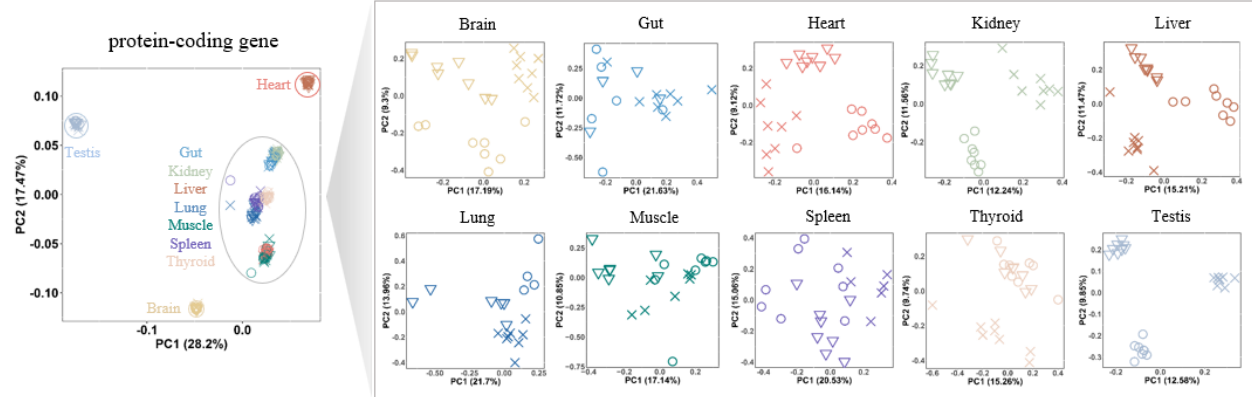

B

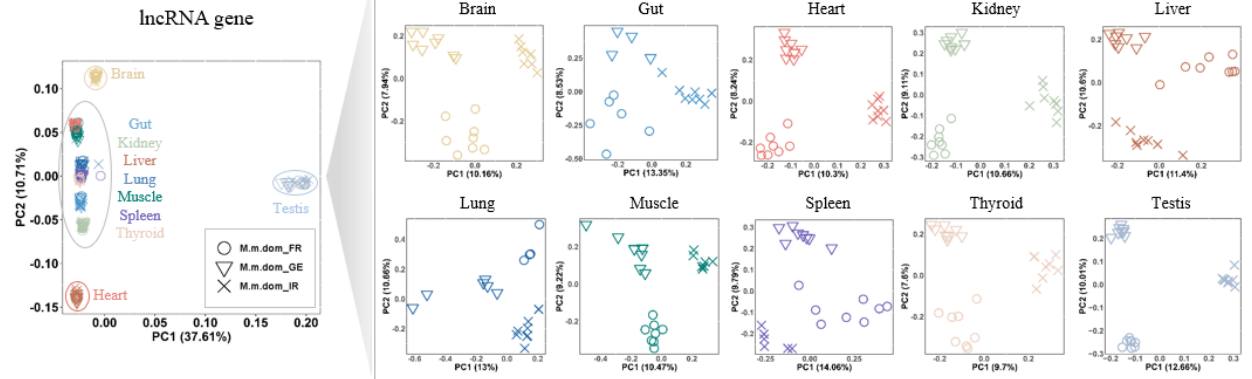

**Figure S5 Organ-specific patterns of gene expression divergence in male transcriptome.** Principal component analysis (PCA) of (A) protein-coding gene and (B) lncRNA gene expression profiles. Main panels display global clustering patterns across all organs, with insets showing organ-specific analyses. Principal components 1 and 2 (PC1/PC2) are shown, with variance explained indicated in axis labels.

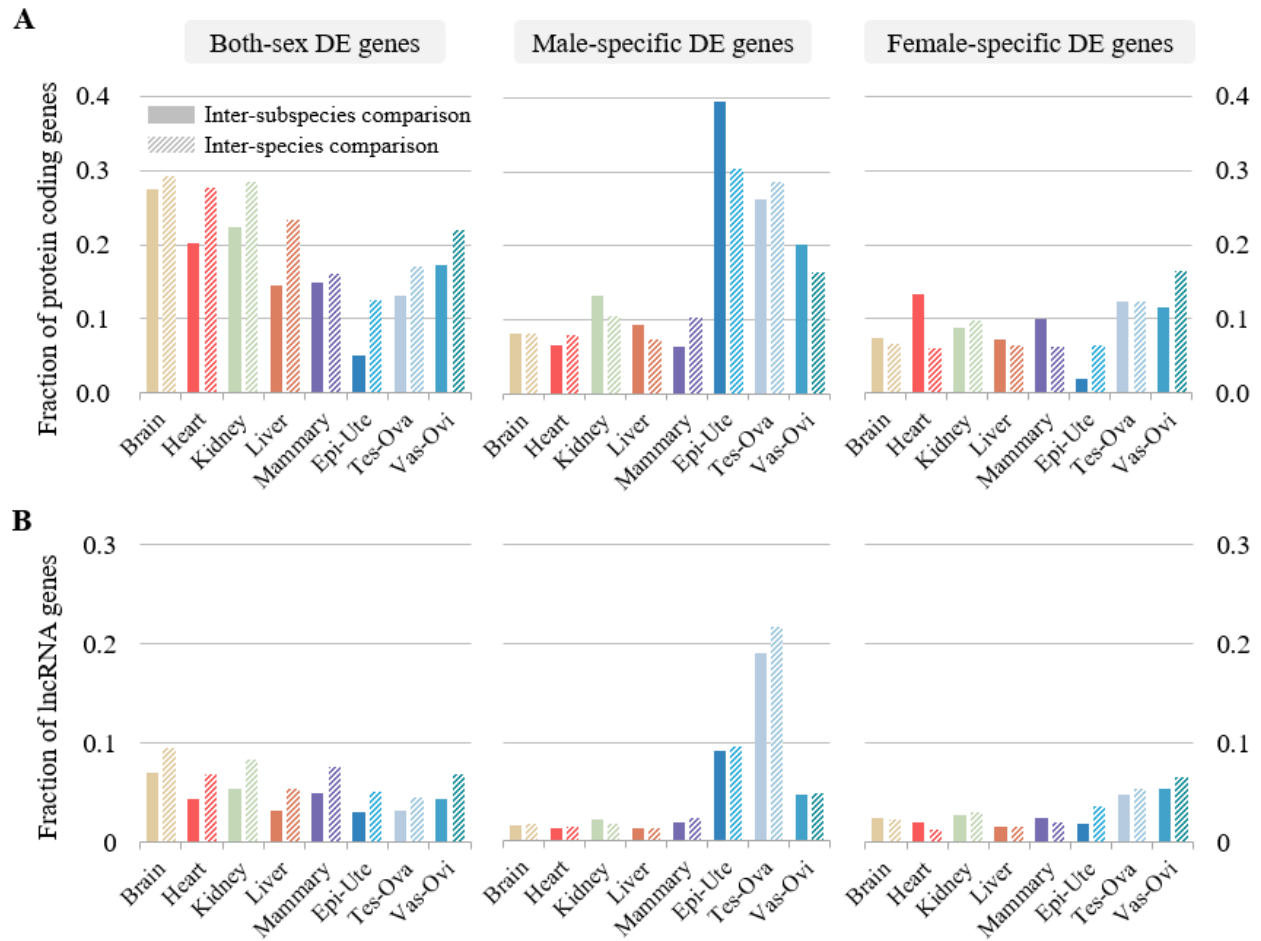

**Figure S6 Distribution on the fraction of genes for three types of expression patterns.** The fraction distribution patterns were visualized for (A) protein-coding and (B) lncRNA genes. Inter-subspecies and inter-species comparison data were visually differentiated using solid-filled and hatched bars, respectively. Definition of gene categories: i) both-sex DE genes, with significant gene expression level changes between taxa in both sexes; ii) male-specific DE genes, with significant gene expression level changes between taxa in male only; iii) female-specific DE genes, with significant gene expression level changes between taxa in female only. Organ abbreviations follow Figure 2.

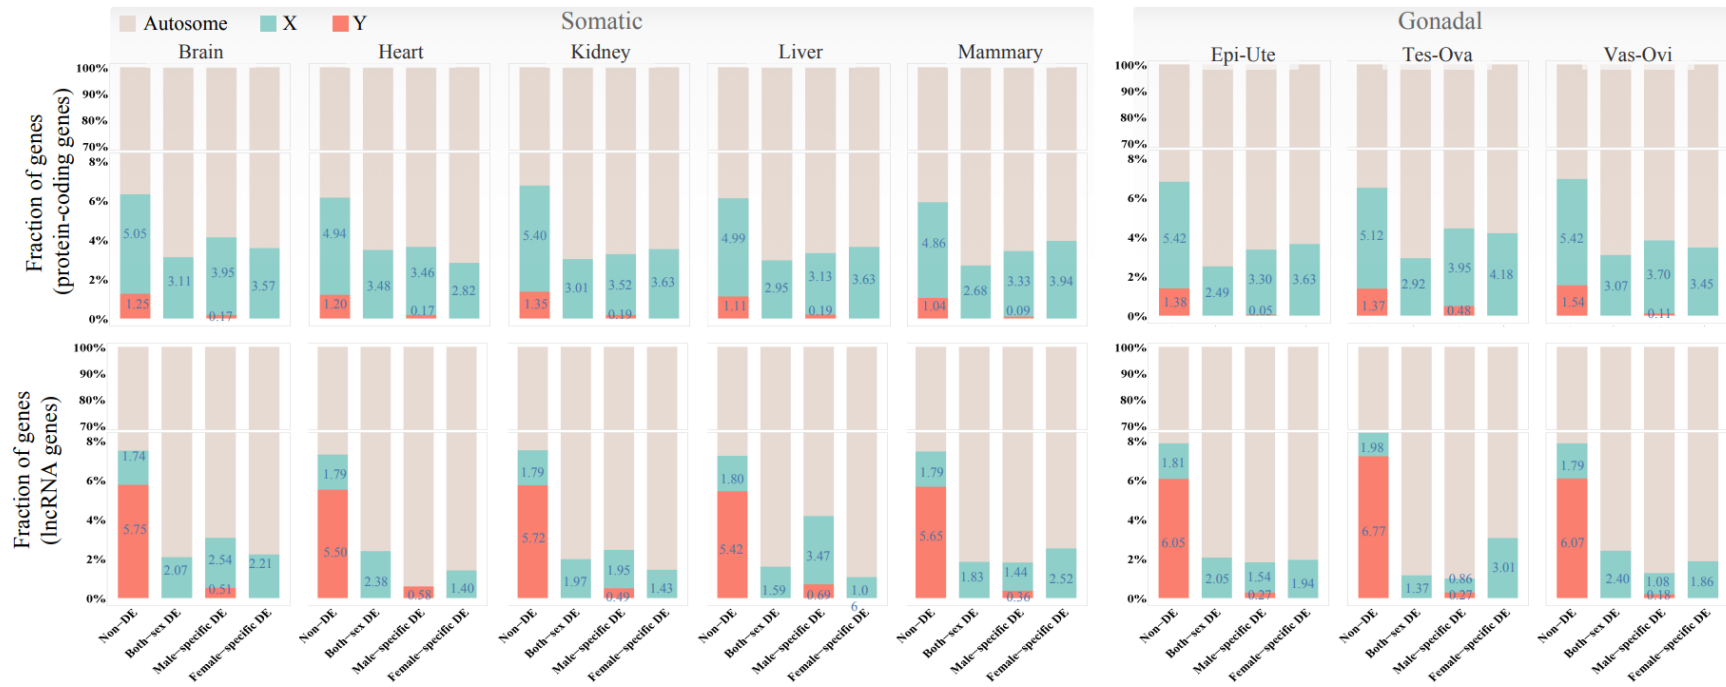

**Figure S7 Chromosomal distribution of genes for four types of expression patterns in inter-species comparisons.** Percentages of genes located on autosomes, the X chromosome, and the Y chromosome are indicated adjacent to each bar. Definition of four types of gene expression patterns: i) non-DE genes, with significant gene expression level changes between taxa in neither sex; ii) both-sex DE genes, with significant gene expression level changes between taxa in both sexes; iii) male-specific DE genes, with significant gene expression level changes between taxa in male only; iv) female-specific DE genes, with significant gene expression level changes between taxa in female only. Organ abbreviations follow Figure 2.



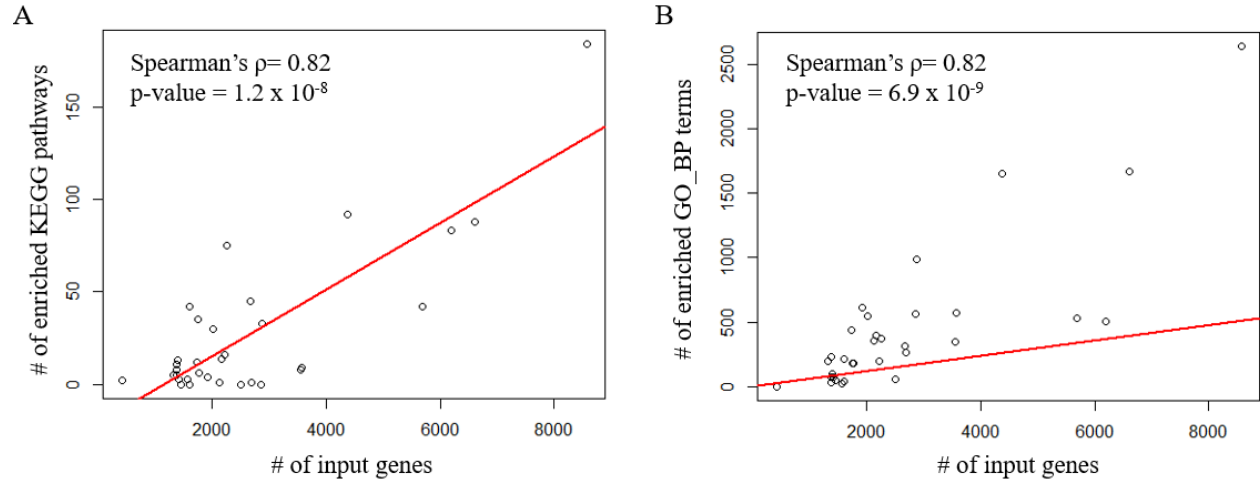

**Figure S8 Correlation between the numbers of input genes and (A) KEGG pathways and (B) GO BP terms.** These analyses were performed on the basis of male- and female-specific DE protein-coding genes across organs from both inter-subspecies and inter-species comparisons. The significant functional enrichment terms were defined as those passing statistical significance after multiple correction testing ( $FDR \leq 0.05$ ). The correlation significance tests were performed using Spearman's correlation tests.

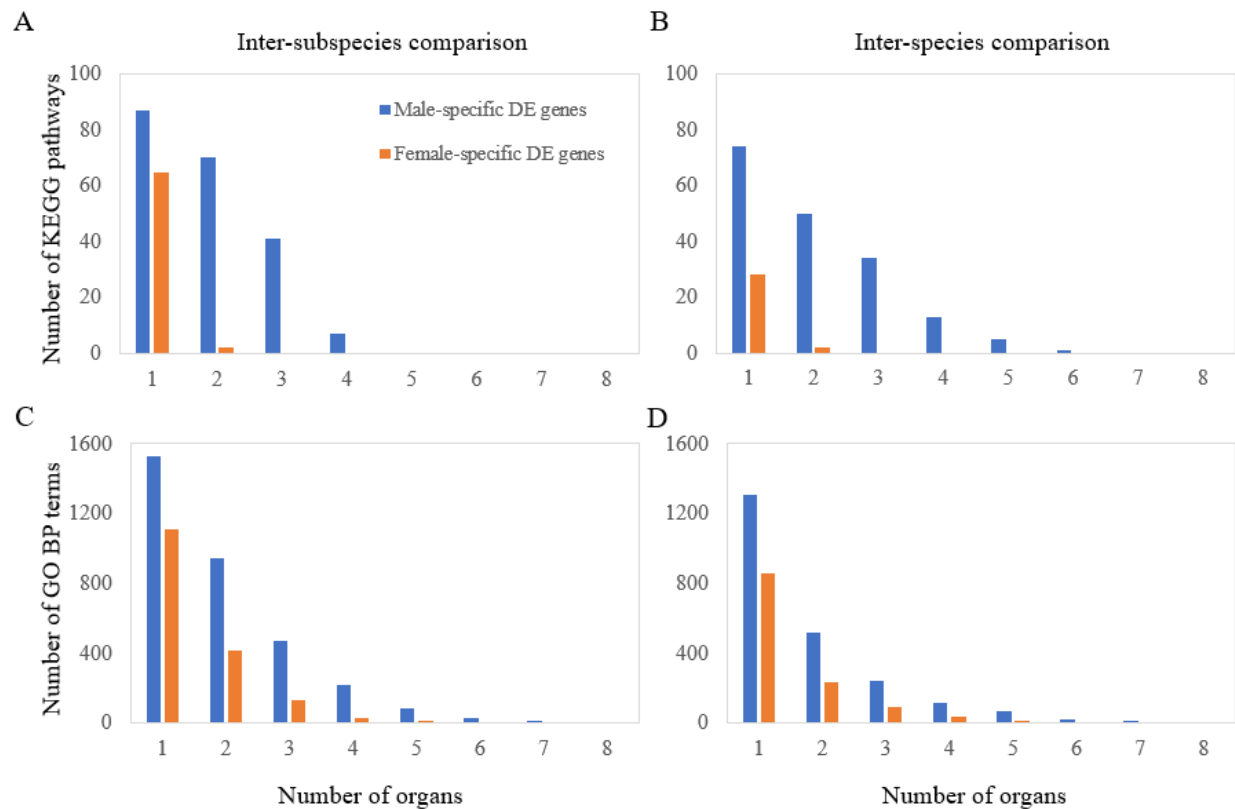

**Figure S9 Distribution on the number of functional enrichment terms across organs for sex-specific DE genes.** These analyses were performed on the basis of male- and female-specific DE gene across organs from both inter-subspecies and inter-species comparisons. Only functional enrichment terms (KEGG pathways and GO BP terms) passing statistical significance after multiple correction testing ( $FDR \leq 0.05$ ) were retained for analysis.

**Supplementary Table S1 Statistics on the functional enrichment terms of sex-specific DE genes.** Only the KEGG pathways and GO BP terms passing statistical significance after multiple correlation tests ( $FDR \leq 0.05$ ) were counted.

|         |                  | # of sex-specific DE genes |                          | # of enriched KEGG pathways ( $FDR \leq 0.05$ ) |                          |           | # of enriched GO BP terms ( $FDR \leq 0.05$ ) |                          |            |
|---------|------------------|----------------------------|--------------------------|-------------------------------------------------|--------------------------|-----------|-----------------------------------------------|--------------------------|------------|
|         |                  | Male-specific DE genes     | Female-specific DE genes | Male-specific DE genes                          | Female-specific DE genes | Overlap   | Male-specific DE genes                        | Female-specific DE genes | Overlap    |
| Brain   | Inter-subspecies | 1763                       | 1596                     | 6                                               | 0                        | 0 (0%)    | 185                                           | 37                       | 7 (6.3%)   |
|         | Inter-species    | 1750                       | 1459                     | 35                                              | 0                        | 0 (0%)    | 178                                           | 46                       | 10 (8.9%)  |
| Heart   | Inter-subspecies | 1405                       | 2881                     | 13                                              | 33                       | 1 (4.3%)  | 99                                            | 990                      | 39 (7.2%)  |
|         | Inter-species    | 1734                       | 1315                     | 12                                              | 5                        | 0 (0%)    | 442                                           | 199                      | 40 (12.5%) |
| Kidney  | Inter-subspecies | 2857                       | 1913                     | 0                                               | 4                        | 0 (0%)    | 566                                           | 616                      | 90 (15.2%) |
|         | Inter-species    | 2262                       | 2132                     | 75                                              | 1                        | 0 (0%)    | 369                                           | 353                      | 70 (19.4%) |
| Liver   | Inter-subspecies | 2024                       | 1570                     | 30                                              | 3                        | 1 (6.1%)  | 547                                           | 21                       | 7 (2.5%)   |
|         | Inter-species    | 1599                       | 1381                     | 42                                              | 8                        | 1 (4%)    | 211                                           | 231                      | 38 (17.2%) |
| Mammary | Inter-subspecies | 1372                       | 2173                     | 11                                              | 14                       | 1 (8%)    | 74                                            | 400                      | 22 (9.3%)  |
|         | Inter-species    | 2221                       | 1374                     | 16                                              | 5                        | 0 (0%)    | 195                                           | 35                       | 1 (0.9%)   |
| Epi-Ute | Inter-subspecies | 8570                       | 415                      | 184                                             | 2                        | 0 (0%)    | 2641                                          | 0                        | 0 (0%)     |
|         | Inter-species    | 6602                       | 1411                     | 88                                              | 3                        | 0 (0%)    | 1671                                          | 73                       | 18 (2.1%)  |
| Tes-Ova | Inter-subspecies | 5680                       | 2662                     | 42                                              | 45                       | 6 (13.8%) | 532                                           | 314                      | 46 (10.9%) |
|         | Inter-species    | 6203                       | 2683                     | 83                                              | 1                        | 0 (0%)    | 503                                           | 264                      | 33 (8.6%)  |
| Vas-Ovi | Inter-subspecies | 4373                       | 2503                     | 92                                              | 0                        | 0 (0%)    | 1655                                          | 53                       | 22 (2.6%)  |
|         | Inter-species    | 3549                       | 3565                     | 8                                               | 9                        | 0 (0%)    | 347                                           | 575                      | 99 (21.5%) |
