# Supplementary material for: Population level analyses reveal contrasting landscapes of gene expression divergence and evolution between male and female transcriptome lineages in the house mouse
Source: Research Square preprint supplement (doi:10.21203/rs.3.rs-6634316/v1), 2025-05-22
Supplement: Supplementary file 1 [file 0506f3fbf640a3ed29023fae.xlsx]

## Sheet: Data_S4
Supplementary Data S4. Percentage of sex-biased genes in the four gene categories with distinct gene expression patterns. Definition of four types of gene expression patterns: i) non-DE genes, with significant gene expression level changes between taxa in neither sexes; ii) both-sex DE genes, with significant gene expression level changes between taxa in both sexes; iii) male-specific DE genes, w…
Gene type	Organ type	Organ	Comparison mode	Non-DE gene	Both-sex DE gene	Male-specific DE gene	Female-specific DE gene	p-value (non-DE vs combined DE)	p-value (both-sex vs combined sex-specific DE)	p-value (male-specific DE vs female-specific DE)
Protein coding genes	Somatic	Brain	Inter-subspecies	12389; 23 (0.19%)	5936; 43 (0.72%)	1763; 34 (1.93%)	1596; 34 (2.13%)	1.95 x 10-21	1.95 x 10-8	0.71
		Brain	Inter-species	12124; 37 (0.31%)	6351; 49 (0.77%)	1750; 45 (2.57%)	1459; 31 (2.12%)	9.32 x 10-18	4.00 x 10-10	0.42
		Heart	Inter-subspecies	13004; 646 (4.97%)	4394; 1029 (23.42%)	1405; 403 (28.68%)	2881; 1126 (39.08%)	0	4.75 x 10-36	2.06 x 10-11
		Heart	Inter-species	12655; 166 (1.31%)	5980; 257 (4.30%)	1734; 127 (7.32%)	1315; 112 (8.52%)	1.25 x 10-69	1.12 x 10-11	0.25
		Kidney	Inter-subspecies	12067; 2658 (22.03%)	4847; 3088 (63.71%)	2857; 2045 (71.58%)	1913; 1300 (67.96%)	0	2.43 x 10-11	0.0081
		Kidney	Inter-species	11130; 1524 (13.69%)	6160; 2949 (47.87%)	2262; 1576 (69.67%)	2132; 1312 (61.54%)	0	1.54 x 10-74	1.48 x 10-8
		Liver	Inter-subspecies	14932; 1414 (9.47%)	3158; 941 (29.80%)	2024; 907 (44.81%)	1570; 661 (42.10%)	0	6.20 x 10-32	0.11
		Liver	Inter-species	13645; 780 (5.72%)	5059; 1247 (24.65%)	1599; 575 (35.96%)	1381; 445 (32.22%)	0	5.65 x 10-20	0.033
		Mammary	Inter-subspecies	14927; 1269 (8.50%)	3212; 461 (14.35%)	1372; 336 (24.49%)	2173; 515 (23.70%)	2.72 x 10-109	6.83 x 10-24	0.6
		Mammary	Inter-species	14610; 1171 (8.02%)	3479; 500 (14.37%)	2221; 524 (23.59%)	1374; 447 (32.53%)	3.50 x 10-150	1.16 x 10-39	6.34 x 10-9
	Gonadal	Epi-Ute	Inter-subspecies	11609; 4272 (36.80%)	1090; 905 (83.03%)	8570; 7265 (84.77%)	415; 376 (90.60%)	0	0.081	0.00088
		Epi-Ute	Inter-species	10971; 4312 (39.30%)	2700; 2335 (86.48%)	6602; 5804 (87.91%)	1411; 1250 (88.59%)	0	0.036	0.5
		Tes-Ova	Inter-subspecies	10513; 5203 (49.49%)	2829; 2716 (96.01%)	5680; 5511 (97.02%)	2662; 2533 (95.15%)	0	0.3	2.77 x 10-5
		Tes-Ova	Inter-species	9093; 4130 (45.42%)	3705; 3541 (95.57%)	6203; 5866 (94.57%)	2683; 2455 (91.50%)	0	1.87 x 10-05	1.31 x 10-7
		Vas-Ovi	Inter-subspecies	11075; 3896 (35.18%)	3733; 3185 (85.32%)	4373; 3878 (88.68%)	2503; 2319 (92.65%)	0	3.62 x 10-13	7.01 x 10-8
		Vas-Ovi	Inter-species	9798; 3311 (33.79%)	4772; 4116 (86.25%)	3549; 3189 (89.86%)	3565; 3190 (89.48%)	0	1.85 x 10-8	0.61
lncRNA genes	Somatic	Brain	Inter-subspecies	10322; 3 (0.03%)	815; 4 (0.49%)	184; 4 (2.17%)	287; 1 (0.35%)	3.95 x 10-7	0.3	0.079
		Brain	Inter-species	10030; 3 (0.03%)	1110; 3 (0.27%)	197; 2 (1.02%)	271; 0 (0.00%)	0.0018	0.64	0.18
		Heart	Inter-subspecies	10712; 15 (0.14%)	508; 26 (5.12%)	155; 12 (7.74%)	233; 33 (14.16%)	5.41 x 10-65	0.00044	0.074
		Heart	Inter-species	10492; 1 (0.01%)	801; 7 (0.87%)	172; 3 (1.74%)	143; 3 (2.10%)	7.18 x 10-13	0.21	1
		Kidney	Inter-subspecies	10412; 186 (1.79%)	621; 254 (40.90%)	253; 138 (54.55%)	322; 119 (36.96%)	0	0.2	3.32 x 10-5
		Kidney	Inter-species	10089; 71 (0.70%)	964; 250 (25.93%)	205; 89 (43.41%)	350; 94 (26.86%)	0	0.0038	8.17 x 10-5
		Liver	Inter-subspecies	10900; 63 (0.58%)	374; 76 (20.32%)	146; 41 (28.08%)	188; 38 (20.21%)	3.94 x 10-142	0.32	0.12
		Liver	Inter-species	10647; 29 (0.27%)	629; 62 (9.86%)	144; 31 (21.53%)	188; 30 (15.96%)	6.11x 10-107	0.00024	0.2
		Mammary	Inter-subspecies	10541; 81 (0.77%)	569; 45 (7.91%)	216; 26 (12.04%)	282; 35 (12.41%)	1.87 x 10-61	0.019	1
		Mammary	Inter-species	10218; 42 (0.41%)	874; 50 (5.72%)	278; 23 (8.27%)	238; 41 (17.23%)	1.92 x 10-71	1.81 x 10-5	0.003
	Gonadal	Epi-Ute	Inter-subspecies	9998; 666 (6.66%)	344; 269 (78.20%)	1055; 891 (84.45%)	211; 177 (83.89%)	0	0.0094	0.12
		Epi-Ute	Inter-species	9503; 585 (6.16%)	586; 481 (82.08%)	1106; 774 (69.98%)	413; 279 (67.55%)	0	1.56 x 10-9	4.13 x 10-5
		Tes-Ova	Inter-subspecies	8469; 1236 (14.59%)	364; 347 (95.33%)	2211; 1950 (88.20%)	564; 511 (90.60%)	0	3.75 x 10-5	0.12
		Tes-Ova	Inter-species	7931; 888 (11.20%)	527; 480 (91.08%)	2526; 1756 (69.52%)	624; 485 (77.72%)	0	8.87 x 10-26	4.13 x 10-5
		Vas-Ovi	Inter-subspecies	9933; 496 (4.99%)	500; 361 (72.20%)	546; 459 (84.07%)	629; 487 (77.42%)	0	0.00023	0.005
		Vas-Ovi	Inter-species	9505; 416 (4.38%)	792; 549 (69.32%)	557; 421 (75.58%)	754; 508 (67.37%)	0	0.46	0.0014
Summary of the above statistical tests
	non-DE vs combined DE		both-sex vs combined sex-specific DE		male-specific DE vs female-specific DE
	Protein-coding genes	lncRNA genes	Protein-coding genes	lncRNA genes	Protein-coding genes	lncRNA genes
# of total statistical tests	16	16	16	16	16	16
# of statistical tests with significance (p-value < 0.05)	16	16	14	10	9	7
