# Supplementary material for: Population level analyses reveal contrasting landscapes of gene expression divergence and evolution between male and female transcriptome lineages in the house mouse
Source: Research Square preprint supplement (doi:10.21203/rs.3.rs-6634316/v1), 2025-05-22
Supplement: Supplementary file 2 [file 2667261826e8b65fd52da296.xlsx]

## Sheet: Data S7A
Supplementary Data S7A. Full list of DE protein-coding genes for the first RNA-Seq dataset. Only the DE genes reaching statistical significance after multiple correction testing (FDR < 0.05) were retained.
Brain																								Heart																								Kidney
Inter-subspecies (FR vs KA)												Inter-species (FR-KA vs SP)												Inter-subspecies (FR vs KA)												Inter-species (FR-KA vs SP)												Inter-subspecies (FR vs KA)
Male						Female						Male						Female						Male						Female						Male						Female						Male
Geneid	logFC	logCPM	LR	PValue	FDR	Geneid	logFC	logCPM	LR	PValue	FDR	Geneid	logFC	logCPM	LR	PValue	FDR	Geneid	logFC	logCPM	LR	PValue	FDR	Geneid	logFC	logCPM	LR	PValue	FDR	Geneid	logFC	logCPM	LR	PValue	FDR	Geneid	logFC	logCPM	LR	PValue	FDR	Geneid	logFC	logCPM	LR	PValue	FDR	Geneid	logFC
ENSMUSG00000044792	-1.43646	6.1078	1145.97	3.36797e-251	4.94721e-247	ENSMUSG00000044792	-1.43671	6.08055	904.338	1.11897e-198	1.67084e-194	ENSMUSG00000078240	9.93839	2.84758	3801.1	0	0	ENSMUSG00000078240	10.0032	2.79617	3061.95	0	0	ENSMUSG00000079022	7.2447	4.95155	1342.92	5.33007e-294	7.23717e-290	ENSMUSG00000044042	4.70513	5.37816	1020.18	7.37643e-224	1.01441e-219	ENSMUSG00000078240	10.5348	3.3031	4116.78	0	0	ENSMUSG00000078240	10.7245	3.27547	1910.85	0	0	ENSMUSG00000063929	7.54114
ENSMUSG00000079108	-7.3645	3.4479	1090.37	4.08735e-239	3.00195e-235	ENSMUSG00000063412	4.01658	1.81654	886.825	7.17642e-195	5.35791e-191	ENSMUSG00000029605	4.36678	3.20336	1612.38	0	0	ENSMUSG00000064370	-3.11416	11.9503	1344.42	2.5182e-294	1.92025e-290	ENSMUSG00000026535	-10.9059	2.99431	977.743	1.23677e-214	8.39645e-211	ENSMUSG00000079108	-7.746	3.41416	777.189	4.91725e-171	3.3811e-167	ENSMUSG00000024254	9.13876	2.21828	1852.31	0	0	ENSMUSG00000029727	5.44121	2.65437	1290.35	1.41643e-282	9.99785e-279	ENSMUSG00000086784	-4.64333
ENSMUSG00000058174	6.39472	1.41394	812.39	1.09234e-178	5.34848e-175	ENSMUSG00000073079	-3.08469	1.88695	756.701	1.40102e-166	6.97333e-163	ENSMUSG00000079941	4.21908	4.40821	2029.42	0	0	ENSMUSG00000079941	4.10672	4.40652	1250.41	6.75611e-274	3.43458e-270	ENSMUSG00000019945	-5.00055	3.4251	892.867	3.48774e-196	1.57855e-192	ENSMUSG00000019945	-5.50525	3.26064	727.935	2.51911e-160	1.15476e-156	ENSMUSG00000037949	-5.8385	8.67424	1684.01	0	0	ENSMUSG00000022364	2.5805	4.25133	1273.73	5.77951e-279	2.71965e-275	ENSMUSG00000024503	-12.3357
ENSMUSG00000020483	0.818631	10.0401	699.325	4.19169e-154	1.53929e-150	ENSMUSG00000048758	1.75715	6.13363	727.792	2.70527e-160	1.00988e-156	ENSMUSG00000064370	-2.96057	11.8439	2203.23	0	0	ENSMUSG00000029605	4.35898	3.11832	1212.76	1.02643e-265	3.91353e-262	ENSMUSG00000022040	-2.29737	7.459	874.869	2.85097e-192	9.67761e-189	ENSMUSG00000024935	3.35584	4.22272	658.297	3.50588e-145	1.20532e-141	ENSMUSG00000021417	2.78053	8.47735	1216.02	2.01658e-266	7.02627e-263	ENSMUSG00000024254	8.65069	2.4662	935.396	1.98272e-205	6.99752e-202	ENSMUSG00000074254	-5.15468
ENSMUSG00000091110	5.73804	1.26252	671.432	4.87721e-148	1.43283e-144	ENSMUSG00000044573	1.20375	4.93742	704.236	3.58606e-155	1.07094e-151	ENSMUSG00000037263	5.2344	2.17761	996.233	1.18305e-218	3.55104e-215	ENSMUSG00000037263	4.83909	2.02692	935.337	2.04249e-205	6.23e-202	ENSMUSG00000079108	-7.98012	3.57136	723.723	2.07536e-159	5.63585e-156	ENSMUSG00000020263	-1.42514	6.33283	617.357	2.80944e-136	7.72709e-133	ENSMUSG00000117145	6.73725	0.740186	1113.53	3.78566e-244	1.05521e-240	ENSMUSG00000079941	3.78405	6.11303	901.246	5.26081e-198	1.48534e-194	ENSMUSG00000024580	-1.99074
ENSMUSG00000038569	-3.85162	1.53677	639.426	4.45516e-141	1.0907e-137	ENSMUSG00000079108	-7.13281	3.38458	670.912	6.32747e-148	1.5747e-144	ENSMUSG00000029864	1.93632	4.00201	965.981	4.45601e-212	1.1146e-208	ENSMUSG00000024561	1.08315	6.49062	929.635	3.54463e-204	9.00985e-201	ENSMUSG00000024935	3.45115	4.37626	636.783	1.67358e-140	3.78731e-137	ENSMUSG00000026535	-10.2862	2.6731	582.266	1.20537e-128	2.76272e-125	ENSMUSG00000079941	3.93635	6.20753	1025.93	4.14007e-225	9.61669e-222	ENSMUSG00000069117	-9.32121	4.1274	838.931	1.85354e-184	4.36108e-181	ENSMUSG00000079108	-7.24206
ENSMUSG00000055385	7.14377	1.41719	632.07	1.77248e-139	3.71942e-136	ENSMUSG00000029319	-1.04219	5.49168	639.889	3.53235e-141	7.535e-138	ENSMUSG00000020255	1.30653	6.31466	787.343	3.04798e-173	6.53487e-170	ENSMUSG00000069117	-9.12219	3.24866	915.477	4.2407e-201	9.23928e-198	ENSMUSG00000042606	2.6021	4.92806	594.668	2.41874e-131	4.69167e-128	ENSMUSG00000033488	-2.88437	2.66577	553.642	2.03147e-122	3.99097e-119	ENSMUSG00000029864	2.23036	7.54436	912.09	2.30962e-200	4.59845e-197	ENSMUSG00000037949	-5.83082	8.72501	796.138	3.72946e-175	6.90967e-172	ENSMUSG00000046032	1.69604
ENSMUSG00000063480	-1.01238	5.62454	576.205	2.5095e-127	4.60775e-124	ENSMUSG00000048087	-4.57331	1.50396	552.152	4.28457e-122	7.99715e-119	ENSMUSG00000044724	5.09316	0.70633	763.568	4.49954e-168	8.44113e-165	ENSMUSG00000029730	1.32981	4.45099	845.747	6.11312e-186	1.16539e-182	ENSMUSG00000073079	-3.67074	2.21863	502.667	2.49881e-111	4.2411e-108	ENSMUSG00000026204	3.91972	5.01618	544.505	1.97427e-120	3.39377e-117	ENSMUSG00000038572	7.74688	1.28803	875.229	2.38123e-192	4.1484e-189	ENSMUSG00000026609	7.33461	1.49501	796.041	3.91566e-175	6.90967e-172	ENSMUSG00000068860	5.93266
ENSMUSG00000033794	6.84349	1.54538	575.593	3.4093e-127	5.56436e-124	ENSMUSG00000058174	6.44414	1.55018	533.374	5.21124e-118	8.64603e-115	ENSMUSG00000072487	3.10082	1.51674	759.474	3.4947e-167	5.82761e-164	ENSMUSG00000078153	4.27608	0.955649	823.145	5.01224e-181	8.49353e-178	ENSMUSG00000078495	4.24684	2.9148	441.365	5.46178e-98	8.24001e-95	ENSMUSG00000048087	-4.92751	1.89584	492.924	3.29254e-109	5.03101e-106	ENSMUSG00000030158	7.755	2.12782	844.912	9.28433e-186	1.43773e-182	ENSMUSG00000021417	2.94704	8.44248	789.049	1.29738e-173	2.03501e-170	ENSMUSG00000072494	2.79863
ENSMUSG00000070601	-5.10353	0.876184	558.431	1.84433e-123	2.70914e-120	ENSMUSG00000095041	3.11609	10.341	527.884	8.15228e-117	1.2173e-113	ENSMUSG00000055302	-1.13581	7.46184	758.994	4.4443e-167	6.67001e-164	ENSMUSG00000062464	4.85346	0.516293	731.582	4.05701e-161	6.18735e-158	ENSMUSG00000019988	1.99661	5.06718	436.553	6.08981e-97	8.26874e-94	ENSMUSG00000019988	1.98198	5.07208	491.251	7.61281e-109	1.04691e-105	ENSMUSG00000074156	9.13941	0.480936	830.147	1.50576e-182	2.09857e-179	ENSMUSG00000117145	5.88504	0.872166	709.132	3.08927e-156	4.36112e-153	ENSMUSG00000044349	-6.89737
ENSMUSG00000044573	1.22444	4.88692	555.109	9.74e-123	1.30064e-119	ENSMUSG00000063480	-1.0516	5.62323	520.056	4.11443e-115	5.58515e-112	ENSMUSG00000069117	-8.44558	3.12501	706.549	1.12597e-155	1.53623e-152	ENSMUSG00000044724	4.99224	0.630218	664.26	1.76957e-146	2.45342e-143	ENSMUSG00000053024	-4.02361	3.45994	419.508	3.12301e-93	3.85492e-90	ENSMUSG00000042606	2.62154	5.24429	472.839	7.72571e-105	9.65855e-102	ENSMUSG00000026687	2.4256	5.95868	765.729	1.52514e-168	1.93235e-165	ENSMUSG00000038572	7.78125	1.54239	702.182	1.00259e-154	1.28669e-151	ENSMUSG00000005364	4.7203
ENSMUSG00000034833	6.90597	1.42997	543.497	3.27037e-120	4.0032e-117	ENSMUSG00000033794	7.46915	1.45357	513.408	1.15012e-113	1.43113e-110	ENSMUSG00000032959	-0.927133	7.58235	693.053	9.69317e-153	1.21229e-149	ENSMUSG00000079018	-7.03166	3.37657	652.783	5.54588e-144	7.04836e-141	ENSMUSG00000020256	3.00014	4.53322	393.219	1.64876e-87	1.86557e-84	ENSMUSG00000050612	8.25932	3.54127	460.189	4.37368e-102	5.01224e-99	ENSMUSG00000022364	2.70042	4.27478	746.26	2.60959e-164	3.03082e-161	ENSMUSG00000030905	4.82673	3.22527	630.186	4.55407e-139	5.35749e-136	ENSMUSG00000038879	-3.60835
ENSMUSG00000063412	3.51818	1.74755	543.028	4.13666e-120	4.67411e-117	ENSMUSG00000020483	0.850203	10.0148	507.95	1.77144e-112	2.03471e-109	ENSMUSG00000062464	4.96199	0.585535	684.044	8.82193e-151	1.01846e-147	ENSMUSG00000063808	1.56545	5.40893	640.183	3.04959e-141	3.57763e-138	ENSMUSG00000024842	7.11001	1.65978	391.668	3.58747e-87	3.74697e-84	ENSMUSG00000031636	-3.30416	5.47447	458.732	9.07374e-102	9.59862e-99	ENSMUSG00000029727	5.62618	2.60603	734.763	8.25011e-162	8.84475e-159	ENSMUSG00000068428	6.84589	1.02697	612.08	3.94747e-135	4.28665e-132	ENSMUSG00000027360	10.651
ENSMUSG00000020546	-1.64395	4.43115	531.843	1.12182e-117	1.17703e-114	ENSMUSG00000022193	1.13783	5.24355	495.5	9.05727e-110	9.66022e-107	ENSMUSG00000021417	1.7993	5.68801	624.238	8.95536e-138	9.60015e-135	ENSMUSG00000029864	1.88035	4.05002	618.616	1.49541e-136	1.62903e-133	ENSMUSG00000031636	-2.70999	5.17177	377.066	5.41716e-84	5.25387e-81	ENSMUSG00000032537	-2.86289	4.67437	427.743	5.03742e-95	4.94818e-92	ENSMUSG00000069117	-10.0876	3.90411	639.992	3.35448e-141	3.33938e-138	ENSMUSG00000022571	-3.3941	3.17335	607.89	3.21797e-134	3.24487e-131	ENSMUSG00000026692	-5.19422
ENSMUSG00000029319	-1.02225	5.42152	524.185	5.19979e-116	5.09198e-113	ENSMUSG00000064360	3.47528	2.95635	484.942	1.79651e-107	1.78836e-104	ENSMUSG00000078153	4.09051	1.17794	586.37	1.54327e-129	1.54409e-126	ENSMUSG00000055302	-0.997743	7.44347	604.016	2.24046e-133	2.27795e-130	ENSMUSG00000019990	1.87005	5.48908	373.262	3.64733e-83	3.30156e-80	ENSMUSG00000079022	7.83363	4.67046	420.038	2.39396e-93	2.19478e-90	ENSMUSG00000027223	2.22286	3.98159	600.54	1.27724e-132	1.18673e-129	ENSMUSG00000044037	1.92807	6.10033	604.612	1.66221e-133	1.56436e-130	ENSMUSG00000026874	9.04503
ENSMUSG00000022048	1.33442	8.51	521.055	2.49469e-115	2.29028e-112	ENSMUSG00000025888	-2.37002	1.59882	482.757	5.3693e-107	5.0109e-104	ENSMUSG00000032591	5.56589	-0.169394	571.305	2.92096e-126	2.73986e-123	ENSMUSG00000032959	-0.877607	7.56831	563.479	1.47189e-124	1.40299e-121	ENSMUSG00000030868	1.34199	5.52575	371.106	1.07473e-82	9.12044e-80	ENSMUSG00000044792	-1.67106	7.05059	392.61	2.23696e-87	1.92267e-84	ENSMUSG00000031904	1.34693	4.74499	594.869	2.18652e-131	1.90459e-128	ENSMUSG00000069170	4.39468	1.42939	579.394	5.0808e-128	4.48286e-125	ENSMUSG00000031451	-2.42371
ENSMUSG00000059031	5.96866	1.39497	497.024	4.22147e-110	3.64759e-107	ENSMUSG00000091110	6.43489	1.04151	479.258	3.0985e-106	2.72158e-103	ENSMUSG00000026019	0.873829	5.63169	548.729	2.37984e-121	2.10098e-118	ENSMUSG00000032591	5.38653	0.070763	553.36	2.33875e-122	2.09814e-119	ENSMUSG00000079071	-3.38427	1.74361	368.26	4.4771e-82	3.57589e-79	ENSMUSG00000062661	1.63876	4.82536	389.772	9.27783e-87	7.50522e-84	ENSMUSG00000040726	7.86538	0.884374	582.18	1.25847e-128	1.03172e-125	ENSMUSG00000035575	1.21207	5.90097	556.047	6.0891e-123	5.05646e-120	ENSMUSG00000020988	-2.20808
ENSMUSG00000063694	1.05956	7.02701	494.186	1.74967e-109	1.42783e-106	ENSMUSG00000025362	-1.79198	4.76062	466.848	1.55442e-103	1.28948e-100	ENSMUSG00000047412	1.03684	5.60122	541.672	8.1584e-120	6.8023e-117	ENSMUSG00000025359	2.70046	1.80791	547.312	4.83823e-121	4.09933e-118	ENSMUSG00000063412	3.61715	1.39236	368.06	4.95103e-82	3.73473e-79	ENSMUSG00000030868	1.08174	5.5784	374.487	1.97327e-83	1.50758e-80	ENSMUSG00000066850	9.49349	1.19303	578.666	7.31472e-128	5.66363e-125	ENSMUSG00000066850	8.95894	1.10823	516.082	3.01327e-114	2.36324e-111	ENSMUSG00000028164	-1.77916
ENSMUSG00000010021	2.12249	3.31667	457.518	1.66774e-101	1.28934e-98	ENSMUSG00000020546	-1.51652	4.49646	459.742	5.47063e-102	4.29934e-99	ENSMUSG00000079018	-6.6449	3.36819	536.092	1.33573e-118	1.05508e-115	ENSMUSG00000046846	5.19052	-0.151386	510.137	5.92145e-113	4.75305e-110	ENSMUSG00000025362	-2.34827	5.15609	366.636	1.01061e-81	7.22211e-79	ENSMUSG00000034035	2.57171	2.67774	333.462	1.69346e-74	1.17981e-71	ENSMUSG00000007279	-6.20289	3.40967	578.329	8.66093e-128	6.35302e-125	ENSMUSG00000040505	5.99096	0.352345	512.746	1.60202e-113	1.1903e-110	ENSMUSG00000029802	-1.73416
ENSMUSG00000025362	-1.88522	4.69661	453.39	1.31932e-100	9.68978e-98	ENSMUSG00000055385	7.60281	1.3333	447.891	2.07539e-99	1.54948e-96	ENSMUSG00000046846	5.64972	-0.088233	534.54	2.90609e-118	2.18073e-115	ENSMUSG00000016283	7.84529	-0.332359	508.251	1.5228e-112	1.16121e-109	ENSMUSG00000044792	-1.65816	7.03728	358.535	5.86973e-80	3.98496e-77	ENSMUSG00000073079	-3.27896	2.10168	333.436	1.71583e-74	1.17981e-71	ENSMUSG00000020334	2.26852	3.74039	573.98	7.64693e-127	5.32877e-124	ENSMUSG00000056666	2.62412	6.60672	501.794	3.87014e-111	2.73174e-108	ENSMUSG00000039653	4.03397
ENSMUSG00000060636	1.05216	6.00595	449.285	1.03224e-99	7.22026e-97	ENSMUSG00000057666	-1.02664	9.70665	437.811	3.24238e-97	2.30548e-94	ENSMUSG00000052031	-7.1362	3.36957	527.275	1.10618e-116	7.90553e-114	ENSMUSG00000072487	2.94894	1.46358	493.631	2.31061e-109	1.67806e-106	ENSMUSG00000042428	-3.03257	2.38864	339.18	9.62451e-76	6.22293e-73	ENSMUSG00000029001	3.01782	3.63205	332.247	3.11508e-74	2.03993e-71	ENSMUSG00000029669	1.4111	5.90229	546.879	6.01038e-121	3.98889e-118	ENSMUSG00000039840	1.45048	5.35478	492.985	3.19324e-109	2.13151e-106	ENSMUSG00000075000	-2.24326
ENSMUSG00000075000	-1.69216	2.47843	435.661	9.52568e-97	6.36012e-94	ENSMUSG00000059031	5.15739	1.34797	419.856	2.62352e-93	1.78066e-90	ENSMUSG00000022219	-3.39668	1.31382	519.177	6.39032e-115	4.35936e-112	ENSMUSG00000052031	-6.95938	3.25442	483.84	3.12042e-107	2.16316e-104	ENSMUSG00000029001	3.18474	3.44392	338.434	1.39934e-75	8.63644e-73	ENSMUSG00000037727	6.92842	3.57245	325.762	8.04993e-73	5.03194e-70	ENSMUSG00000049090	1.09622	7.28118	509.512	8.09817e-113	5.13019e-110	ENSMUSG00000026687	2.26918	5.98891	492.907	3.32176e-109	2.13151e-106	ENSMUSG00000044792	-1.50817
ENSMUSG00000073079	-3.07915	1.8515	431.959	6.08941e-96	3.88902e-93	ENSMUSG00000032705	-1.04355	6.37617	409.817	4.01765e-91	2.60833e-88	ENSMUSG00000029918	-1.63611	3.79814	515.612	3.81232e-114	2.48762e-111	ENSMUSG00000047909	1.03063	5.79979	481.636	9.41385e-107	6.2422e-104	ENSMUSG00000026495	-1.75369	6.48116	327.366	3.6012e-73	2.12596e-70	ENSMUSG00000066107	7.50494	0.0173821	321.969	5.39521e-72	3.22587e-69	ENSMUSG00000044674	2.49041	5.03172	489.459	1.86876e-108	1.13239e-105	ENSMUSG00000033540	1.44804	5.428	477.828	6.34351e-106	3.89354e-103	ENSMUSG00000066364	-6.55674
ENSMUSG00000021091	-2.72191	6.08587	428.977	2.71342e-95	1.66073e-92	ENSMUSG00000022766	-3.2576	1.62565	408.96	6.17196e-91	3.83999e-88	ENSMUSG00000028979	-6.11478	1.21008	496.465	5.5874e-110	3.49399e-107	ENSMUSG00000026644	2.38543	1.28326	455.301	5.06476e-101	3.21845e-98	ENSMUSG00000048087	-3.83659	1.33116	318.993	2.40034e-71	1.35799e-68	ENSMUSG00000023039	-5.57552	2.92568	318.643	2.86064e-71	1.63915e-68	ENSMUSG00000030905	4.5982	3.0189	474.777	2.92603e-105	1.69917e-102	ENSMUSG00000107417	7.70058	-0.68706	465.679	2.79247e-103	1.64256e-100	ENSMUSG00000117621	-2.74406
ENSMUSG00000076437	1.89693	4.32888	428.51	3.42951e-95	2.01504e-92	ENSMUSG00000025413	-1.29714	5.28361	399.221	8.13783e-89	4.86056e-86	ENSMUSG00000057219	1.19476	3.62731	488.618	2.84817e-108	1.70981e-105	ENSMUSG00000093806	5.86768	1.54653	450.536	5.51425e-100	3.36391e-97	ENSMUSG00000033898	4.57531	1.34772	318.488	3.09277e-71	1.67975e-68	ENSMUSG00000037005	-5.50341	3.08951	316.404	8.79547e-71	4.83821e-68	ENSMUSG00000026609	7.07857	1.72981	473.913	4.51141e-105	2.51502e-102	ENSMUSG00000044674	2.14331	5.00626	452.142	2.46586e-100	1.39242e-97	ENSMUSG00000033898	4.60642
ENSMUSG00000054034	0.762521	6.29515	417.993	6.67377e-93	3.77042e-90	ENSMUSG00000038569	-3.59592	1.42237	390.887	5.30596e-87	3.04725e-84	ENSMUSG00000021635	1.07549	4.72496	487.264	5.61243e-108	3.23967e-105	ENSMUSG00000049123	3.2109	0.513307	443.586	1.79513e-98	1.05298e-95	ENSMUSG00000033998	-5.81153	0.716479	311.922	8.32912e-70	4.34972e-67	ENSMUSG00000095041	2.44267	7.93242	314.465	2.32566e-70	1.2301e-67	ENSMUSG00000076435	-4.08322	4.95502	469.666	3.78764e-104	2.03032e-101	ENSMUSG00000029864	2.10816	7.53195	436.595	5.9647e-97	3.2386e-94	ENSMUSG00000031750	2.85476
ENSMUSG00000037159	4.58578	1.00535	417.311	9.39017e-93	5.1086e-90	ENSMUSG00000046750	-5.7104	-0.204676	362.987	6.29634e-81	3.48211e-78	ENSMUSG00000096696	-6.73761	0.641969	484.042	2.81965e-107	1.56731e-104	ENSMUSG00000021417	1.78076	5.70127	437.412	3.95943e-97	2.23649e-94	ENSMUSG00000038569	-3.93277	0.253513	303.609	5.38839e-68	2.70416e-65	ENSMUSG00000046709	2.04347	5.22738	313.743	3.34108e-70	1.70172e-67	ENSMUSG00000001014	5.26112	2.81273	458.356	1.09561e-101	5.65539e-99	ENSMUSG00000074156	9.3227	0.770621	417.808	7.32095e-93	3.82777e-90	ENSMUSG00000029102	3.45913
ENSMUSG00000027332	0.755475	6.55368	416.017	1.79651e-92	9.42464e-90	ENSMUSG00000091511	-5.44951	0.307987	362.173	9.47137e-81	5.05095e-78	ENSMUSG00000029730	1.24371	4.43787	477.905	6.10409e-106	3.27179e-103	ENSMUSG00000029918	-1.70137	3.88133	436.345	6.75906e-97	3.68151e-94	ENSMUSG00000028132	3.22687	2.98192	303.541	5.57641e-68	2.70416e-65	ENSMUSG00000027777	1.79091	4.01429	312.855	5.21517e-70	2.56139e-67	ENSMUSG00000026644	3.55091	1.6335	445.66	6.34754e-99	3.15949e-96	ENSMUSG00000026644	3.55164	1.69002	402.178	1.84812e-89	9.31782e-87	ENSMUSG00000030498	-2.5309
ENSMUSG00000025413	-1.29615	5.28076	412.504	1.04505e-91	5.29335e-89	ENSMUSG00000060636	1.10481	6.07991	359.108	4.40297e-80	2.26707e-77	ENSMUSG00000024561	1.03967	6.4784	472.002	1.17533e-104	6.08252e-102	ENSMUSG00000023806	1.88166	3.84543	432.073	5.75134e-96	3.02461e-93	ENSMUSG00000062661	1.5457	4.76808	302.383	9.96612e-68	4.6662e-65	ENSMUSG00000027236	1.32996	5.55156	309.917	2.27702e-69	1.07978e-66	ENSMUSG00000027487	1.08808	4.93692	436.493	6.2777e-97	3.01697e-94	ENSMUSG00000031904	1.2781	4.80527	377.988	3.41137e-84	1.66063e-81	ENSMUSG00000029819	-4.40483
ENSMUSG00000022193	1.08071	5.27766	406.613	2.00156e-90	9.8003e-88	ENSMUSG00000033439	1.55113	4.26527	354.52	4.39443e-79	2.18725e-76	ENSMUSG00000090266	-1.61268	2.87096	469.999	3.20638e-104	1.60405e-101	ENSMUSG00000036552	-2.06004	2.87022	429.662	1.9254e-95	9.78808e-93	ENSMUSG00000033488	-2.67863	2.27265	293.824	7.30012e-66	3.30404e-63	ENSMUSG00000026062	-3.77946	1.80012	307.746	6.76638e-69	3.10171e-66	ENSMUSG00000020080	5.73293	-0.920035	431.031	9.69426e-96	4.50363e-93	ENSMUSG00000047909	1.41278	5.21052	373.831	2.74255e-83	1.29055e-80	ENSMUSG00000078597	3.41936
ENSMUSG00000064360	3.16688	2.7024	400.156	5.09369e-89	2.41359e-86	ENSMUSG00000047228	-2.73101	2.3808	353.18	8.60227e-79	4.14352e-76	ENSMUSG00000025359	2.89901	1.73349	450.178	6.59695e-100	3.19378e-97	ENSMUSG00000090266	-1.58157	2.94635	421.911	9.36365e-94	4.60661e-91	ENSMUSG00000032067	-1.40962	4.58924	283.511	1.28979e-63	5.64928e-61	ENSMUSG00000076437	1.62051	4.12693	305.201	2.42463e-68	1.0756e-65	ENSMUSG00000021211	5.34825	-0.383519	427.634	5.31881e-95	2.39123e-92	ENSMUSG00000096696	-8.30055	1.58844	364.501	2.9473e-81	1.34216e-78	ENSMUSG00000036835	-1.51265
ENSMUSG00000072494	1.43811	3.27264	392.004	3.03146e-87	1.39154e-84	ENSMUSG00000026032	0.771599	5.87367	349.75	4.80483e-78	2.24205e-75	ENSMUSG00000050106	2.74326	0.855071	418.673	4.74597e-93	2.22586e-90	ENSMUSG00000021635	0.969836	4.70015	414.596	3.66255e-92	1.74555e-89	ENSMUSG00000059031	5.55614	0.243311	282.972	1.6907e-63	7.17385e-61	ENSMUSG00000053985	-2.21777	2.34693	288.339	1.14435e-64	4.91786e-62	ENSMUSG00000107417	6.80239	-0.978016	424.58	2.45782e-94	1.07046e-91	ENSMUSG00000021660	-0.94339	6.57065	363.291	5.40775e-81	2.38566e-78	ENSMUSG00000044573	1.3847
ENSMUSG00000022766	-3.60292	1.35272	369.361	2.57843e-82	1.12081e-79	ENSMUSG00000046032	0.698201	5.95475	349.009	6.96425e-78	3.15122e-75	ENSMUSG00000033450	-4.72502	2.52949	407.576	1.23533e-90	5.61813e-88	ENSMUSG00000056941	0.77786	4.91162	413.583	6.0839e-92	2.81168e-89	ENSMUSG00000026675	2.95864	3.90891	282.049	2.68654e-63	1.10539e-60	ENSMUSG00000033186	1.10381	5.63965	287.662	1.60697e-64	6.69668e-62	ENSMUSG00000040505	6.24445	-0.09337	410.882	2.35543e-91	9.94778e-89	ENSMUSG00000022583	7.59733	0.254318	361.684	1.21013e-80	5.17678e-78	ENSMUSG00000014602	3.92553
ENSMUSG00000038936	0.775185	6.39011	369.349	2.59429e-82	1.12081e-79	ENSMUSG00000079426	0.808145	6.76757	348.629	8.42709e-78	3.70098e-75	ENSMUSG00000049123	3.62793	0.464422	407.369	1.37039e-90	6.04906e-88	ENSMUSG00000020255	1.16292	6.34464	398.942	9.35889e-89	4.19801e-86	ENSMUSG00000021048	1.19984	5.98271	280.568	5.64722e-63	2.25523e-60	ENSMUSG00000063412	4.05452	1.50797	281.027	4.48576e-63	1.81436e-60	ENSMUSG00000096696	-9.76946	1.46814	409.047	5.91052e-91	2.42279e-88	ENSMUSG00000013033	-1.57958	5.46733	360.083	2.70136e-80	1.12162e-77	ENSMUSG00000058174	6.84767
ENSMUSG00000022476	-0.998328	4.91299	346.114	2.97411e-77	1.24819e-74	ENSMUSG00000003038	1.1771	5.33711	339.819	6.9864e-76	2.9806e-73	ENSMUSG00000019039	-1.13636	5.26534	386.819	4.07806e-86	1.74867e-83	ENSMUSG00000069208	-2.78947	2.219	397.929	1.55548e-88	6.77791e-86	ENSMUSG00000044375	5.30108	1.3845	272.781	2.81129e-61	1.09062e-58	ENSMUSG00000029869	-3.65091	2.89539	277.238	3.0031e-62	1.17996e-59	ENSMUSG00000052099	5.4143	-0.353707	402.194	1.83403e-89	7.30312e-87	ENSMUSG00000073434	2.47839	4.0176	349.771	4.7528e-78	1.91701e-75	ENSMUSG00000058297	3.40517
ENSMUSG00000028621	1.35689	2.87469	343.586	1.05654e-76	4.31098e-74	ENSMUSG00000037159	4.18975	0.943271	337.115	2.71098e-75	1.12446e-72	ENSMUSG00000040466	1.0315	3.85337	386.29	5.31689e-86	2.21655e-83	ENSMUSG00000059336	-2.70776	3.4745	385.56	7.66586e-86	3.24756e-83	ENSMUSG00000095041	2.65451	7.88424	272.179	3.8021e-61	1.43402e-58	ENSMUSG00000025362	-2.38484	5.41975	275.393	7.57785e-62	2.89474e-59	ENSMUSG00000068428	7.2732	1.03433	401.607	2.46107e-89	9.52776e-87	ENSMUSG00000093806	6.93155	1.48053	347.896	1.21725e-77	4.77331e-75	ENSMUSG00000025362	-2.23781
ENSMUSG00000079426	0.773982	6.74902	341.986	2.35723e-76	9.35819e-74	ENSMUSG00000063694	0.995885	7.02689	333.828	1.40966e-74	5.68893e-72	ENSMUSG00000024421	-1.89002	3.71687	375.654	1.09933e-83	4.45912e-81	ENSMUSG00000074695	-9.38964	1.15026	376.077	8.89211e-84	3.66523e-81	ENSMUSG00000025630	-1.33538	5.43304	270.188	1.03252e-60	3.78907e-58	ENSMUSG00000024842	5.54687	1.4247	267.858	3.32515e-60	1.23588e-57	ENSMUSG00000022571	-3.52645	3.0146	400.685	3.90655e-89	1.4715e-86	ENSMUSG00000040726	7.57163	1.17594	346.538	2.40439e-77	9.17373e-75	ENSMUSG00000047586	-7.44823
ENSMUSG00000032705	-1.03083	6.27973	341.224	3.45387e-76	1.3351e-73	ENSMUSG00000024121	1.78576	8.03451	326.997	4.33329e-73	1.70276e-70	ENSMUSG00000036552	-1.87053	2.80868	355.949	2.14668e-79	8.47826e-77	ENSMUSG00000020234	3.69072	-0.102254	372.877	4.42479e-83	1.77585e-80	ENSMUSG00000071748	2.97624	1.21537	269.074	1.80627e-60	6.45409e-58	ENSMUSG00000079071	-3.6505	1.67747	260.117	1.61817e-58	5.85606e-56	ENSMUSG00000032854	6.15895	1.05401	392.945	1.89145e-87	6.93716e-85	ENSMUSG00000052914	2.89813	4.56864	342.064	2.26612e-76	8.41863e-74	ENSMUSG00000036523	-3.5209
ENSMUSG00000047228	-3.13893	2.39385	338.122	1.63624e-75	6.16274e-73	ENSMUSG00000067597	-4.71186	-0.0318048	326.335	6.03894e-73	2.31214e-70	ENSMUSG00000074695	-8.16374	0.861704	350.511	3.27923e-78	1.26191e-75	ENSMUSG00000074865	-3.4174	1.74798	368.486	3.99768e-82	1.5633e-79	ENSMUSG00000020263	-1.44947	6.25	267.183	4.66537e-60	1.62427e-57	ENSMUSG00000001166	-7.97882	-0.410792	256.386	1.05271e-57	3.71201e-55	ENSMUSG00000033540	1.56224	5.42191	388.483	1.77081e-86	6.32813e-84	ENSMUSG00000064354	3.15391	6.58175	336.451	3.78284e-75	1.36929e-72	ENSMUSG00000048655	3.90711
ENSMUSG00000029596	1.81287	2.94232	323.805	2.14843e-72	7.88957e-70	ENSMUSG00000031295	-1.34137	4.67215	313.687	3.43669e-70	1.28292e-67	ENSMUSG00000031904	0.792734	5.2917	349.334	5.91763e-78	2.22029e-75	ENSMUSG00000051251	3.64329	0.62309	359.324	3.95217e-80	1.50686e-77	ENSMUSG00000015365	0.994246	6.95237	247.497	9.12097e-56	3.09611e-53	ENSMUSG00000003038	1.30543	5.37162	255.739	1.45637e-57	5.00701e-55	ENSMUSG00000035575	1.11629	5.89116	382.597	3.38532e-85	1.17953e-82	ENSMUSG00000047786	-6.13847	1.26629	331.202	5.25942e-74	1.85618e-71	ENSMUSG00000029059	-2.83791
ENSMUSG00000033596	-0.88954	4.72672	320.718	1.01059e-71	3.62063e-69	ENSMUSG00000027236	1.0436	4.89348	311.453	1.05374e-69	3.83766e-67	ENSMUSG00000063808	1.39032	5.36296	348.181	1.05493e-77	3.86154e-75	ENSMUSG00000050106	2.59586	0.594977	352.046	1.51916e-78	5.65092e-76	ENSMUSG00000026764	-3.69953	2.38821	246.327	1.64124e-55	5.4353e-53	ENSMUSG00000026495	-1.65407	6.35321	253.423	4.65904e-57	1.56271e-54	ENSMUSG00000039840	1.47151	5.31311	380.314	1.06337e-84	3.61469e-82	ENSMUSG00000055782	2.4628	4.7627	329.445	1.2694e-73	4.37075e-71	ENSMUSG00000084174	-8.7149
ENSMUSG00000027342	-0.995208	4.70768	317.73	4.52342e-71	1.58201e-68	ENSMUSG00000022048	1.35242	8.50742	308.701	4.18894e-69	1.48927e-66	ENSMUSG00000032400	2.28002	2.69613	347.506	1.4796e-77	5.28709e-75	ENSMUSG00000022994	0.753447	6.41523	348.488	9.04568e-78	3.28466e-75	ENSMUSG00000026204	2.96409	5.09253	237.471	1.40023e-53	4.52674e-51	ENSMUSG00000006931	-1.73636	4.21097	251.184	1.43357e-56	4.69391e-54	ENSMUSG00000064370	-2.6392	14.293	378.71	2.37537e-84	7.88226e-82	ENSMUSG00000020334	2.11968	3.67501	322.69	3.75772e-72	1.26304e-69	ENSMUSG00000071551	-3.59612
ENSMUSG00000003038	1.16473	5.29902	310.08	2.0976e-69	7.16551e-67	ENSMUSG00000031311	-0.574635	6.66774	307.775	6.66611e-69	2.31484e-66	ENSMUSG00000074865	-3.0588	1.57456	344.951	5.32779e-77	1.85952e-74	ENSMUSG00000022219	-3.15809	1.22956	347.116	1.79962e-77	6.38279e-75	ENSMUSG00000027236	1.22546	5.69902	229.859	6.39994e-52	2.02089e-49	ENSMUSG00000042428	-3.35303	2.9495	250.156	2.40148e-56	7.68027e-54	ENSMUSG00000019986	1.84384	3.15764	366.31	1.19041e-81	3.8583e-79	ENSMUSG00000029918	-1.74592	4.31327	318.307	3.38627e-71	1.11172e-68	ENSMUSG00000015890	6.05609
ENSMUSG00000042606	1.12719	5.4011	309.853	2.35156e-69	7.85047e-67	ENSMUSG00000078495	3.33834	2.26929	306.803	1.08579e-68	3.68479e-66	ENSMUSG00000030792	-3.37704	1.75623	343.579	1.06024e-76	3.61639e-74	ENSMUSG00000004451	0.788243	4.84307	345.382	4.29399e-77	1.48836e-74	ENSMUSG00000046709	1.62518	5.22444	224.886	7.77427e-51	2.39907e-48	ENSMUSG00000032067	-1.46791	4.62778	246.257	1.70046e-55	5.31471e-53	ENSMUSG00000055114	-6.38175	0.509612	364.609	2.7926e-81	8.84556e-79	ENSMUSG00000051154	-1.23097	5.49476	317.334	5.51475e-71	1.75181e-68	ENSMUSG00000055027	3.35095
ENSMUSG00000021606	0.800973	5.87351	301.52	1.5366e-67	5.01581e-65	ENSMUSG00000036391	0.762982	5.46822	305.049	2.61687e-68	8.68336e-66	ENSMUSG00000093806	5.95689	1.06426	341.446	3.08966e-76	1.03044e-73	ENSMUSG00000032400	2.00399	2.62258	344.43	6.92134e-77	2.34572e-74	ENSMUSG00000040616	-1.90661	3.19187	224.639	8.80237e-51	2.65597e-48	ENSMUSG00000020734	-8.18171	2.49732	243.035	8.56799e-55	2.61838e-52	ENSMUSG00000026544	2.4887	3.55937	361.315	1.45595e-80	4.50923e-78	ENSMUSG00000025816	1.10082	4.60503	317.31	5.58414e-71	1.75181e-68	ENSMUSG00000059031	5.25711
ENSMUSG00000064351	-0.945232	13.0243	297.443	1.18826e-66	3.79441e-64	ENSMUSG00000041453	0.758123	7.50202	302.831	7.95986e-68	2.58384e-65	ENSMUSG00000063698	-1.41127	3.65569	332.004	3.51746e-74	1.14761e-71	ENSMUSG00000018924	3.98721	-0.280078	340.342	5.3754e-76	1.78218e-73	ENSMUSG00000034035	3.00747	2.56657	222.866	2.14459e-50	6.33026e-48	ENSMUSG00000020295	-8.00831	0.455422	240.034	3.86542e-54	1.15559e-51	ENSMUSG00000069170	4.95062	1.13565	356.754	1.43346e-79	4.34308e-77	ENSMUSG00000052099	5.10091	-0.522028	316.92	6.79008e-71	2.08382e-68	ENSMUSG00000033053	8.21729
ENSMUSG00000046032	0.712956	5.93368	297.204	1.3395e-66	4.18638e-64	ENSMUSG00000075000	-1.71096	2.42653	296.132	2.29306e-66	7.28509e-64	ENSMUSG00000015355	2.52061	0.271523	331.612	4.28228e-74	1.36741e-71	ENSMUSG00000021660	-0.783514	6.21811	339.326	8.94669e-76	2.9031e-73	ENSMUSG00000041782	-4.8198	1.7516	221.145	5.08883e-50	1.47013e-47	ENSMUSG00000002043	1.95155	4.20248	238.979	6.56624e-54	1.92125e-51	ENSMUSG00000079598	3.74238	1.91218	354.474	4.49707e-79	1.33352e-76	ENSMUSG00000063698	-2.13256	2.52267	316.054	1.04816e-70	3.14826e-68	ENSMUSG00000026070	2.56849
ENSMUSG00000070493	0.762176	6.90762	296.939	1.52984e-66	4.68162e-64	ENSMUSG00000054034	0.749261	6.29178	295.501	3.14796e-66	9.79278e-64	ENSMUSG00000040528	3.127	-0.0913962	328.928	1.64569e-73	5.14553e-71	ENSMUSG00000030945	5.5442	-1.18845	338.404	1.42088e-75	4.51454e-73	ENSMUSG00000027956	-2.0493	5.16294	221.02	5.41757e-50	1.5325e-47	ENSMUSG00000022040	-1.90782	7.05803	237.014	1.7616e-53	5.047e-51	ENSMUSG00000034501	1.47195	3.24955	351.818	1.70344e-78	4.946e-76	ENSMUSG00000076435	-3.61316	4.8692	314.053	2.86017e-70	8.41189e-68	ENSMUSG00000025204	-1.78357
ENSMUSG00000061313	0.614915	6.87343	289.165	7.5588e-65	2.26594e-62	ENSMUSG00000021809	-1.46518	3.09743	287.574	1.67974e-64	5.11876e-62	ENSMUSG00000016283	7.24489	-0.525562	325.631	8.59639e-73	2.63295e-70	ENSMUSG00000015355	2.84339	0.576172	334.873	8.34451e-75	2.59719e-72	ENSMUSG00000056973	-2.43464	7.2969	219.44	1.19796e-49	3.31958e-47	ENSMUSG00000020264	-1.82598	4.59111	235.243	4.28463e-53	1.20249e-50	ENSMUSG00000025092	1.54335	5.73759	349.003	6.98744e-78	1.98743e-75	ENSMUSG00000005907	1.43718	4.60179	301.498	1.55421e-67	4.47771e-65	ENSMUSG00000027597	2.20271
ENSMUSG00000021809	-1.40406	3.12755	287.35	1.87901e-64	5.52015e-62	ENSMUSG00000002043	1.49637	2.78213	279.043	1.21393e-62	3.62528e-60	ENSMUSG00000016194	-2.04877	4.29175	317.529	5.00275e-71	1.50162e-68	ENSMUSG00000096696	-7.44649	0.685161	333.731	1.47941e-74	4.5125e-72	ENSMUSG00000066107	7.17512	-0.193667	217.54	3.11218e-49	8.45144e-47	ENSMUSG00000028036	-4.39148	3.83749	233.44	1.05974e-52	2.91471e-50	ENSMUSG00000028488	2.80385	2.5989	340.38	5.27436e-76	1.47017e-73	ENSMUSG00000028164	1.05587	5.06244	297.145	1.37975e-66	3.89559e-64	ENSMUSG00000003418	-2.34612
ENSMUSG00000026032	0.744151	5.84138	287.115	2.1143e-64	6.08959e-62	ENSMUSG00000117621	-3.29684	0.618094	278.28	1.78037e-62	5.21265e-60	ENSMUSG00000069208	-2.99484	2.17715	317.012	6.48379e-71	1.90801e-68	ENSMUSG00000047036	-0.782122	8.11658	331.734	4.02906e-74	1.20485e-71	ENSMUSG00000025221	1.7729	8.48831	215.707	7.81231e-49	2.07991e-46	ENSMUSG00000024236	1.21186	9.15889	233.12	1.24447e-52	3.35567e-50	ENSMUSG00000051154	-1.31058	5.44879	337.045	2.80825e-75	7.67424e-73	ENSMUSG00000027223	1.74255	3.9585	294.99	4.06788e-66	1.126e-63	ENSMUSG00000070280	-3.82181
ENSMUSG00000095567	0.966035	6.74285	283.811	1.10961e-63	3.13445e-61	ENSMUSG00000060803	0.926608	6.19035	277.874	2.18255e-62	6.26728e-60	ENSMUSG00000056941	0.693734	4.86471	316.441	8.63365e-71	2.49181e-68	ENSMUSG00000018921	0.792541	5.39539	316.25	9.50176e-71	2.78676e-68	ENSMUSG00000060771	1.30519	3.62656	213.316	2.59644e-48	6.77972e-46	ENSMUSG00000021048	1.27925	5.99478	228.091	1.5545e-51	4.11106e-49	ENSMUSG00000036687	8.02184	2.90063	336.536	3.62475e-75	9.71504e-73	ENSMUSG00000000560	4.99493	0.369542	293.041	1.08112e-65	2.93504e-63	ENSMUSG00000043155	2.74814
ENSMUSG00000030795	0.656932	8.82907	283.087	1.59547e-63	4.42187e-61	ENSMUSG00000021091	-2.51487	5.931	276.002	5.58408e-62	1.57323e-59	ENSMUSG00000026639	1.59003	2.12585	315.222	1.59075e-70	4.50453e-68	ENSMUSG00000063698	-1.40308	3.65258	314.234	2.6121e-70	7.51645e-68	ENSMUSG00000055312	4.12441	1.17996	213.219	2.72628e-48	6.98442e-46	ENSMUSG00000028621	1.56502	4.28976	226.451	3.54224e-51	9.19112e-49	ENSMUSG00000024411	-6.74463	3.02209	331.471	4.59515e-74	1.20835e-71	ENSMUSG00000052031	-4.27581	2.40291	289.849	5.36402e-65	1.42875e-62	ENSMUSG00000026558	1.31282
ENSMUSG00000036002	0.835055	5.75814	281.356	3.80363e-63	1.03466e-60	ENSMUSG00000076437	1.83216	4.32742	271.42	5.56496e-61	1.53881e-58	ENSMUSG00000069808	-1.32527	3.62398	311.937	8.26385e-70	2.29674e-67	ENSMUSG00000031958	1.32449	4.40109	308.999	3.60808e-69	1.01901e-66	ENSMUSG00000032537	-3.08584	4.91951	211.639	6.0298e-48	1.51616e-45	ENSMUSG00000024121	1.6749	6.18195	224.183	1.10672e-50	2.81845e-48	ENSMUSG00000005907	1.03418	4.43608	326.516	5.51632e-73	1.42372e-70	ENSMUSG00000031939	1.17541	4.94412	289.658	5.90296e-65	1.54319e-62	ENSMUSG00000041362	1.58981
ENSMUSG00000091511	-5.02005	-0.0254161	279.781	8.38021e-63	2.23812e-60	ENSMUSG00000050856	0.812174	6.77871	268.098	2.94695e-60	8.00069e-58	ENSMUSG00000057246	1.91381	2.64984	311.582	9.87634e-70	2.69499e-67	ENSMUSG00000062861	-1.34947	3.61771	307.965	6.06088e-69	1.68063e-66	ENSMUSG00000053985	-2.08644	2.18018	211.229	7.40921e-48	1.82913e-45	ENSMUSG00000048758	1.96387	6.70115	222.441	2.65439e-50	6.63694e-48	ENSMUSG00000024645	1.22017	5.77436	320.283	1.25656e-71	3.18412e-69	ENSMUSG00000037697	1.21739	5.19013	285.439	4.90207e-64	1.25823e-61	ENSMUSG00000024697	-4.46976
ENSMUSG00000033439	1.5299	4.22545	278.546	1.55771e-62	4.08593e-60	ENSMUSG00000090461	5.78059	-0.103018	266.464	6.69114e-60	1.78414e-57	ENSMUSG00000022472	-0.725237	6.80417	311.019	1.30959e-69	3.5097e-67	ENSMUSG00000049235	2.28744	0.560974	305.706	1.88209e-68	5.12568e-66	ENSMUSG00000028621	1.26629	4.25037	208.357	3.13543e-47	7.6023e-45	ENSMUSG00000117621	-2.352	1.68641	221.303	4.70021e-50	1.14952e-47	ENSMUSG00000030518	5.56618	1.86418	319.573	1.79463e-71	4.4664e-69	ENSMUSG00000024645	1.34581	5.78412	284.832	6.64679e-64	1.67558e-61	ENSMUSG00000034112	3.28235
ENSMUSG00000024121	1.84747	8.19535	272.679	2.95849e-61	7.62407e-59	ENSMUSG00000070601	-4.95425	1.00253	265.371	1.15837e-59	3.03451e-57	ENSMUSG00000049235	2.51818	0.723939	303.852	4.77105e-68	1.25621e-65	ENSMUSG00000092009	-2.81571	1.19947	299.639	3.94935e-67	1.05669e-64	ENSMUSG00000039347	-1.83415	3.40437	208.053	3.65251e-47	8.70066e-45	ENSMUSG00000019990	1.94018	5.63158	221.276	4.7646e-50	1.14952e-47	ENSMUSG00000044037	2.05701	6.00748	319.209	2.15406e-71	5.26687e-69	ENSMUSG00000020080	6.93035	-1.01107	284.254	8.88555e-64	2.20066e-61	ENSMUSG00000027457	4.3501
ENSMUSG00000021963	0.628836	6.15177	266.784	5.69922e-60	1.44338e-57	ENSMUSG00000072494	1.36637	3.16265	252.489	7.44265e-57	1.9161e-54	ENSMUSG00000021660	-0.761872	6.22169	302.653	8.70352e-68	2.25211e-65	ENSMUSG00000044037	1.22354	4.72652	297.982	9.06513e-67	2.38366e-64	ENSMUSG00000009145	1.67899	2.32616	200.305	1.79216e-45	4.19552e-43	ENSMUSG00000026675	2.57735	3.8573	217.982	2.49194e-49	5.90848e-47	ENSMUSG00000029918	-1.68725	4.30946	317.09	6.23486e-71	1.4982e-68	ENSMUSG00000029253	1.2919	3.89707	281.91	2.87947e-63	7.00852e-61	ENSMUSG00000022875	3.55007
ENSMUSG00000048087	-3.80348	1.14202	266.126	7.93031e-60	1.97438e-57	ENSMUSG00000048440	-3.05829	1.76966	251.95	9.75911e-57	2.46988e-54	ENSMUSG00000039217	-1.9273	3.3041	298.932	5.62972e-67	1.43205e-64	ENSMUSG00000072720	2.76434	1.83885	296.725	1.70357e-66	4.40359e-64	ENSMUSG00000022898	-0.952029	4.78045	199.443	2.7624e-45	6.35728e-43	ENSMUSG00000059031	6.61688	0.390012	214.24	1.6328e-48	3.8058e-46	ENSMUSG00000022583	7.01552	-0.128381	313.602	3.58527e-70	8.46915e-68	ENSMUSG00000036687	6.79617	3.14101	280.947	4.66862e-63	1.11707e-60	ENSMUSG00000115338	-1.68361
ENSMUSG00000051113	2.17522	3.11844	262.724	4.37173e-59	1.07027e-56	ENSMUSG00000020532	-0.561516	6.48287	244.572	3.96036e-55	9.85603e-53	ENSMUSG00000030945	5.63221	-0.914361	298.078	8.63869e-67	2.16082e-64	ENSMUSG00000002608	-0.91529	5.28995	294.251	5.89379e-66	1.4981e-63	ENSMUSG00000050014	-5.8167	-0.62385	196.357	1.30275e-44	2.94813e-42	ENSMUSG00000040569	4.56346	2.22478	207.305	5.31916e-47	1.21915e-44	ENSMUSG00000013033	-1.37407	5.29381	312.713	5.60092e-70	1.301e-67	ENSMUSG00000021768	4.42024	1.73233	272.212	3.73997e-61	8.79953e-59	ENSMUSG00000057425	2.84204
ENSMUSG00000074182	0.942435	4.75489	261.463	8.23317e-59	1.98257e-56	ENSMUSG00000010021	2.22844	3.46336	242.998	8.73129e-55	2.13731e-52	ENSMUSG00000018921	0.795954	5.39735	297.435	1.19312e-66	2.93546e-64	ENSMUSG00000052727	-0.803919	10.2683	293.634	8.03224e-66	2.00819e-63	ENSMUSG00000034063	2.59244	0.969731	195.833	1.69523e-44	3.77341e-42	ENSMUSG00000040616	-1.93147	3.63599	207.123	5.82925e-47	1.31416e-44	ENSMUSG00000034105	1.92327	3.82885	311.541	1.00809e-69	2.30323e-67	ENSMUSG00000024561	1.22083	6.04305	271.949	4.26785e-61	9.87693e-59	ENSMUSG00000059248	1.28628
ENSMUSG00000027663	-0.850453	6.42984	261.33	8.80153e-59	2.08525e-56	ENSMUSG00000033596	-0.755492	4.69701	242.327	1.22252e-54	2.9443e-52	ENSMUSG00000047909	1.01594	5.8025	294.351	5.60365e-66	1.35644e-63	ENSMUSG00000031843	0.985798	4.04373	286.691	2.61609e-64	6.43515e-62	ENSMUSG00000037129	4.10661	4.99901	194.815	2.82703e-44	6.19121e-42	ENSMUSG00000060739	-1.16784	4.99988	206.299	8.81653e-47	1.95556e-44	ENSMUSG00000038268	-2.67076	2.0815	301.977	1.22183e-67	2.74656e-65	ENSMUSG00000078503	-5.15497	1.0804	267.544	3.89138e-60	8.86042e-58	ENSMUSG00000047281	2.71283
ENSMUSG00000078495	3.33667	1.93644	260.214	1.54158e-58	3.59434e-56	ENSMUSG00000054594	-4.64186	-0.230027	238.092	1.02502e-53	2.42947e-51	ENSMUSG00000079293	2.85877	0.134519	293.598	8.17894e-66	1.94841e-63	ENSMUSG00000025586	-0.67355	5.85545	283.146	1.54892e-63	3.74962e-61	ENSMUSG00000073609	-2.12223	4.9247	190.709	2.22678e-43	4.79924e-41	ENSMUSG00000022193	1.33659	5.73666	204.551	2.12178e-46	4.63153e-44	ENSMUSG00000056124	1.06073	6.08092	299.867	3.52212e-67	7.7917e-65	ENSMUSG00000078584	-1.57058	4.51095	266.521	6.50441e-60	1.4575e-57	ENSMUSG00000026535	-8.3198
ENSMUSG00000092416	-1.3936	4.8327	258.611	3.44604e-58	7.90919e-56	ENSMUSG00000027342	-0.899278	4.74663	237.52	1.36613e-53	3.18735e-51	ENSMUSG00000069053	3.09716	0.866869	292.472	1.43863e-65	3.37358e-63	ENSMUSG00000028411	1.11421	5.54828	282.18	2.5151e-63	5.99341e-61	ENSMUSG00000035041	4.92956	-0.294866	188.864	5.627e-43	1.1938e-40	ENSMUSG00000031303	1.86551	2.52768	204.033	2.75312e-46	5.91576e-44	ENSMUSG00000025937	1.20984	5.69625	299.165	5.00821e-67	1.09062e-64	ENSMUSG00000037306	-2.16102	5.17005	260.626	1.25334e-58	2.7646e-56	ENSMUSG00000027864	1.58752
ENSMUSG00000062908	-0.680512	5.38331	256.377	1.05724e-57	2.38921e-55	ENSMUSG00000001123	-1.90622	2.04878	235.748	3.32613e-53	7.64088e-51	ENSMUSG00000024846	-5.30853	1.0016	292.328	1.54649e-65	3.57073e-63	ENSMUSG00000074733	-1.09072	5.54904	282.11	2.60539e-63	6.11305e-61	ENSMUSG00000055385	7.85242	-0.540658	184.768	4.4103e-42	9.21278e-40	ENSMUSG00000035337	3.40818	-0.0452415	203.012	4.598e-46	9.72796e-44	ENSMUSG00000027270	5.83396	-0.960357	286.652	2.66782e-64	5.72023e-62	ENSMUSG00000007034	5.10425	-0.917908	259.513	2.19158e-58	4.75977e-56	ENSMUSG00000039037	-5.72216
ENSMUSG00000028426	0.579421	7.80278	254.25	3.07494e-57	6.8436e-55	ENSMUSG00000029596	1.70309	2.84244	233.937	8.25469e-53	1.86756e-50	ENSMUSG00000002608	-0.996596	5.34388	290.115	4.69356e-65	1.06729e-62	ENSMUSG00000040466	1.06239	3.83197	279.535	9.48335e-63	2.19137e-60	ENSMUSG00000026096	1.34476	4.13894	183.395	8.79485e-42	1.80934e-39	ENSMUSG00000054203	4.56826	2.29618	201.789	8.50109e-46	1.77132e-43	ENSMUSG00000019890	-8.67564	0.405235	283.841	1.09285e-63	2.30773e-61	ENSMUSG00000034755	4.17615	0.876344	258.811	3.11635e-58	6.66568e-56	ENSMUSG00000050192	2.57892
ENSMUSG00000057666	-1.00123	9.73976	253.113	5.44303e-57	1.19332e-54	ENSMUSG00000021606	0.851046	5.84456	228.683	1.15509e-51	2.5743e-49	ENSMUSG00000030701	-1.2007	7.78747	283.761	1.13797e-63	2.54906e-61	ENSMUSG00000045780	6.19729	-1.46495	273.094	2.40175e-61	5.46702e-59	ENSMUSG00000023018	-0.983494	5.12624	179.873	5.16671e-41	1.04707e-38	ENSMUSG00000029082	-3.7808	4.75099	201.386	1.04072e-45	2.13611e-43	ENSMUSG00000021789	6.19836	-0.00343138	279.707	8.69718e-63	1.80914e-60	ENSMUSG00000021478	4.09242	1.52447	258.217	4.19937e-58	8.84814e-56	ENSMUSG00000040187	-2.69483
ENSMUSG00000044348	0.911641	4.59495	250.382	2.14353e-56	4.63035e-54	ENSMUSG00000047205	-1.27543	4.44519	228.399	1.33169e-51	2.92423e-49	ENSMUSG00000026112	0.644331	6.83245	278.018	2.03026e-62	4.4809e-60	ENSMUSG00000024846	-4.69	1.12376	272.407	3.39139e-61	7.60618e-59	ENSMUSG00000029319	-0.943829	6.12686	179.758	5.47438e-41	1.0931e-38	ENSMUSG00000039347	-1.90229	3.87218	201.325	1.07342e-45	2.17083e-43	ENSMUSG00000078584	-1.56814	4.52502	277.009	3.36839e-62	6.9037e-60	ENSMUSG00000038235	-1.16805	5.95389	254.68	2.47905e-57	5.14657e-55	ENSMUSG00000060397	2.0642
ENSMUSG00000039178	-0.754154	4.76336	249.762	2.92609e-56	6.22919e-54	ENSMUSG00000070493	0.786835	6.94718	226.283	3.85432e-51	8.22378e-49	ENSMUSG00000020776	-1.08427	5.80997	277.864	2.19269e-62	4.76927e-60	ENSMUSG00000078584	-1.36512	4.82409	272.043	4.0711e-61	8.9983e-59	ENSMUSG00000063480	-1.09795	5.00603	173.804	1.09216e-39	2.14919e-37	ENSMUSG00000044573	1.07292	4.5535	199.95	2.14119e-45	4.26749e-43	ENSMUSG00000028961	1.18757	5.85782	276.686	3.96037e-62	7.99937e-60	ENSMUSG00000028965	3.91024	-0.197491	250.864	1.68316e-56	3.44365e-54	ENSMUSG00000028621	1.44804
ENSMUSG00000046434	0.603947	8.36348	248.566	5.33321e-56	1.11914e-53	ENSMUSG00000042606	1.15853	5.49506	226.283	3.85524e-51	8.22378e-49	ENSMUSG00000031148	-0.663879	5.52163	277.22	3.02967e-62	6.49561e-60	ENSMUSG00000006642	2.76422	0.135441	271.471	5.42438e-61	1.18182e-58	ENSMUSG00000020264	-2.10225	4.25721	173.64	1.18613e-39	2.30076e-37	ENSMUSG00000026096	1.38549	4.1709	197.361	7.86543e-45	1.54522e-42	ENSMUSG00000047786	-7.18168	1.49503	271.226	6.13375e-61	1.22123e-58	ENSMUSG00000037106	3.4258	2.4463	250.574	1.94655e-56	3.92564e-54	ENSMUSG00000070530	-7.6716
ENSMUSG00000046750	-4.82584	-0.301468	248.301	6.09422e-56	1.26082e-53	ENSMUSG00000025716	5.11367	-0.310388	226.09	4.24627e-51	8.93033e-49	ENSMUSG00000026644	2.55642	1.22849	276.975	3.42634e-62	7.24261e-60	ENSMUSG00000028979	-5.37531	1.25624	270.285	9.83303e-61	2.11216e-58	ENSMUSG00000037788	1.24832	5.28212	172.999	1.63725e-39	3.13106e-37	ENSMUSG00000102692	-4.06763	1.3295	196.682	1.10639e-44	2.14298e-42	ENSMUSG00000045094	-2.23857	3.89733	269.727	1.30147e-60	2.55474e-58	ENSMUSG00000039252	4.3231	4.65378	250.114	2.45181e-56	4.87497e-54	ENSMUSG00000073079	-2.91648
ENSMUSG00000113902	0.710313	5.92046	247.633	8.52032e-56	1.73826e-53	ENSMUSG00000014313	0.649958	7.37713	225.982	4.48351e-51	9.2983e-49	ENSMUSG00000029403	0.758166	5.79945	276.257	4.91165e-62	1.02381e-59	ENSMUSG00000019039	-1.04658	5.25645	268.624	2.26345e-60	4.79443e-58	ENSMUSG00000038552	-1.9452	1.50006	172.893	1.72751e-39	3.2441e-37	ENSMUSG00000061601	3.22801	2.61873	192.522	8.9516e-44	1.70976e-41	ENSMUSG00000042684	2.40808	2.65747	268.579	2.3155e-60	4.48209e-58	ENSMUSG00000028961	1.0104	5.93784	248.137	6.61733e-56	1.29746e-53	ENSMUSG00000028402	1.79929
ENSMUSG00000063681	-2.60163	0.960441	246.517	1.49237e-55	3.00294e-53	ENSMUSG00000062997	0.640935	6.26628	223.251	1.76756e-50	3.61551e-48	ENSMUSG00000050908	0.849533	5.51972	275.885	5.91939e-62	1.21696e-59	ENSMUSG00000025758	1.47369	2.80352	268.071	2.98797e-60	6.2424e-58	ENSMUSG00000031303	2.08166	2.40772	172.874	1.74414e-39	3.2441e-37	ENSMUSG00000022296	2.64174	2.20509	189.563	3.95984e-43	7.45968e-41	ENSMUSG00000052031	-5.15271	2.41812	266.534	6.46118e-60	1.23355e-57	ENSMUSG00000045094	-2.0157	3.77019	247.76	7.99417e-56	1.54594e-53	ENSMUSG00000045031	2.43121
ENSMUSG00000039065	-1.07433	4.04694	244.688	3.73775e-55	7.41942e-53	ENSMUSG00000022323	1.11084	5.76847	221.96	3.37964e-50	6.81956e-48	ENSMUSG00000035984	1.33814	3.22742	275.234	8.2091e-62	1.66489e-59	ENSMUSG00000078503	-6.29753	0.693846	267.269	4.46827e-60	9.20885e-58	ENSMUSG00000006219	-1.34063	7.3592	172.638	1.96386e-39	3.60342e-37	ENSMUSG00000025900	-2.65849	3.00472	187.493	1.12106e-42	2.08335e-40	ENSMUSG00000031939	1.33565	4.78093	266.425	6.82464e-60	1.28534e-57	ENSMUSG00000027669	-1.105	4.63836	246.323	1.64482e-55	3.13784e-53	ENSMUSG00000028423	1.52837
ENSMUSG00000054091	0.802067	5.66631	234.008	7.96533e-53	1.56004e-50	ENSMUSG00000026070	3.48696	-0.0416933	220.994	5.48874e-50	1.09277e-47	ENSMUSG00000045780	6.20753	-1.38225	275.113	8.72338e-62	1.74561e-59	ENSMUSG00000112611	3.92871	-0.907266	265.972	8.56534e-60	1.74173e-57	ENSMUSG00000020734	-7.75296	0.709819	171.881	2.87301e-39	5.2013e-37	ENSMUSG00000071748	2.79341	0.94982	187.307	1.23087e-42	2.25692e-40	ENSMUSG00000047909	1.4682	5.1348	265.517	1.07662e-59	2.00065e-57	ENSMUSG00000001014	4.75436	2.60553	246.141	1.80223e-55	3.39228e-53	ENSMUSG00000024121	1.87986
ENSMUSG00000031311	-0.546973	6.64001	231.862	2.34085e-52	4.52432e-50	ENSMUSG00000021963	0.598421	6.1582	219.972	9.17077e-50	1.80181e-47	ENSMUSG00000001773	-1.28296	3.84682	274.438	1.22376e-61	2.41661e-59	ENSMUSG00000027942	-1.86354	3.06383	265.453	1.11157e-59	2.2306e-57	ENSMUSG00000061601	3.91523	2.71409	171.728	3.10222e-39	5.54237e-37	ENSMUSG00000033845	1.06937	6.25636	186.363	1.97787e-42	3.57891e-40	ENSMUSG00000073434	2.54485	3.90071	264.792	1.54921e-59	2.84097e-57	ENSMUSG00000074865	-5.34533	2.10533	244.161	4.86882e-55	9.04384e-53	ENSMUSG00000079103	5.49971
ENSMUSG00000009927	0.57039	7.51352	231.359	3.01295e-52	5.7477e-50	ENSMUSG00000050708	-1.50685	6.09384	219.634	1.08706e-49	2.10805e-47	ENSMUSG00000031843	1.04307	4.0262	273.516	1.94398e-61	3.78899e-59	ENSMUSG00000026019	0.770663	5.63636	265.387	1.14904e-59	2.27585e-57	ENSMUSG00000021519	1.16899	5.03522	171.218	4.01058e-39	7.07216e-37	ENSMUSG00000078495	3.71483	3.09112	185.033	3.85917e-42	6.89238e-40	ENSMUSG00000028228	1.18676	6.08305	263.692	2.68955e-59	4.86809e-57	ENSMUSG00000027438	1.67468	3.147	244.115	4.98199e-55	9.13386e-53	ENSMUSG00000063412	2.85506
ENSMUSG00000042831	0.775741	4.7537	230.739	4.11316e-52	7.74592e-50	ENSMUSG00000027186	2.69083	0.666416	217.297	3.51498e-49	6.72894e-47	ENSMUSG00000004451	0.869015	4.79348	273.201	2.27694e-61	4.38107e-59	ENSMUSG00000092074	-4.05335	1.44176	264.385	1.8994e-59	3.71381e-57	ENSMUSG00000021809	-1.30371	4.25516	168.737	1.3966e-38	2.43115e-36	ENSMUSG00000025221	2.29923	8.50909	184.489	5.07416e-42	8.94614e-40	ENSMUSG00000057234	1.46866	3.67598	261.84	6.81574e-59	1.21783e-56	ENSMUSG00000021211	4.37739	-0.263367	242.098	1.37171e-54	2.48263e-52	ENSMUSG00000037907	-1.85626
ENSMUSG00000117621	-2.95242	0.513091	230.599	4.41167e-52	8.20291e-50	ENSMUSG00000040752	-4.36368	-0.427563	215.266	9.75202e-49	1.84325e-46	ENSMUSG00000030271	1.36257	2.68139	272.093	3.9705e-61	7.54295e-59	ENSMUSG00000001100	0.592574	6.59281	260.98	1.04937e-58	2.02582e-56	ENSMUSG00000102692	-3.88595	0.408558	168.161	1.8661e-38	3.20734e-36	ENSMUSG00000056598	-2.13701	1.1781	184.03	6.3919e-42	1.11268e-39	ENSMUSG00000045780	7.75848	-0.786895	260.113	1.62142e-58	2.86048e-56	ENSMUSG00000022586	4.7193	0.889502	241.167	2.18906e-54	3.91176e-52	ENSMUSG00000031700	-1.70025
ENSMUSG00000042670	-1.10366	3.29404	229.731	6.82497e-52	1.25315e-49	ENSMUSG00000069769	0.628599	7.84378	212.4	4.1138e-48	7.6784e-46	ENSMUSG00000000326	1.03986	6.22536	268.594	2.29817e-60	4.31137e-58	ENSMUSG00000027544	1.49652	5.01237	257.333	6.54335e-58	1.24741e-55	ENSMUSG00000022296	2.55042	2.05845	166.629	4.03071e-38	6.84113e-36	ENSMUSG00000068747	-1.70003	6.67128	179.958	4.94861e-41	8.50667e-39	ENSMUSG00000052144	-0.859661	5.44951	258.369	3.88987e-58	6.77664e-56	ENSMUSG00000007279	-5.39582	3.1297	237.401	1.45013e-53	2.55894e-51	ENSMUSG00000029596	1.49412
ENSMUSG00000073481	-0.847367	4.92467	229.512	7.61587e-52	1.3811e-49	ENSMUSG00000092048	-3.9522	-0.446842	210.667	9.82561e-48	1.81131e-45	ENSMUSG00000039774	1.66601	1.18467	265.75	9.57654e-60	1.77438e-57	ENSMUSG00000055560	-3.83941	0.587594	257.219	6.93122e-58	1.30504e-55	ENSMUSG00000038496	-3.56983	-0.463656	166.33	4.68665e-38	7.85622e-36	ENSMUSG00000025630	-1.12622	5.48897	178.743	9.11602e-41	1.5477e-38	ENSMUSG00000015377	1.26376	4.69227	257.565	5.82644e-58	1.00251e-55	ENSMUSG00000037921	2.34901	3.94784	236.241	2.59575e-53	4.52398e-51	ENSMUSG00000098557	2.28117
ENSMUSG00000066107	6.55452	-0.556576	228.543	1.2392e-51	2.21984e-49	ENSMUSG00000044176	-3.38311	1.01208	210.57	1.03157e-47	1.87846e-45	ENSMUSG00000054226	-1.60543	5.82036	263.375	3.15399e-59	5.77257e-57	ENSMUSG00000039217	-1.91435	3.44261	254.416	2.83004e-57	5.26354e-55	ENSMUSG00000028125	-3.38266	4.31865	165.65	6.59684e-38	1.09234e-35	ENSMUSG00000036292	-2.81525	0.96904	177.765	1.49049e-40	2.49966e-38	ENSMUSG00000078503	-6.50855	1.02408	256.147	1.18702e-57	2.01751e-55	ENSMUSG00000029605	2.08822	2.84813	234.449	6.3849e-53	1.09921e-50	ENSMUSG00000019843	-1.85732
ENSMUSG00000025278	-0.596543	6.92737	228.212	1.46345e-51	2.58996e-49	ENSMUSG00000116358	5.53109	0.218889	210.429	1.10714e-47	1.99179e-45	ENSMUSG00000030048	-6.26857	0.428781	254.991	2.12025e-57	3.83383e-55	ENSMUSG00000055102	3.54365	-0.376544	253.789	3.8768e-57	7.12351e-55	ENSMUSG00000053469	-3.44304	1.6761	163.683	1.77465e-37	2.90315e-35	ENSMUSG00000063480	-0.945242	5.12393	175.981	3.65647e-40	6.05828e-38	ENSMUSG00000062861	-2.03082	2.60448	254.478	2.74309e-57	4.60608e-55	ENSMUSG00000049090	1.00184	7.21494	233.152	1.22476e-52	2.08312e-50	ENSMUSG00000040464	-1.11199
ENSMUSG00000062691	1.00799	3.5572	227.468	2.12537e-51	3.71662e-49	ENSMUSG00000066107	7.79828	-0.598264	209.418	1.83967e-47	3.27024e-45	ENSMUSG00000011034	-4.11781	0.67097	254	3.48757e-57	6.23113e-55	ENSMUSG00000029536	-0.761987	4.36961	252.726	6.60891e-57	1.19991e-54	ENSMUSG00000054083	3.5177	1.16482	163.22	2.23981e-37	3.62049e-35	ENSMUSG00000020256	3.03413	4.52184	175.7	4.21126e-40	6.89443e-38	ENSMUSG00000031504	1.3798	5.20307	252.851	6.2089e-57	1.03016e-54	ENSMUSG00000026806	1.22384	3.0092	231.021	3.56986e-52	5.99949e-50	ENSMUSG00000055341	-2.24947
ENSMUSG00000022194	0.736214	5.84551	227.201	2.43062e-51	4.2004e-49	ENSMUSG00000040987	1.70514	2.91136	209.289	1.96335e-47	3.44902e-45	ENSMUSG00000054702	-2.90239	0.958211	253.863	3.73428e-57	6.59343e-55	ENSMUSG00000049090	0.657262	5.80819	252.668	6.80322e-57	1.22066e-54	ENSMUSG00000024236	1.18584	9.18151	161.73	4.73776e-37	7.56816e-35	ENSMUSG00000075000	-2.07746	1.80883	175.568	4.49845e-40	7.27797e-38	ENSMUSG00000029605	2.17443	2.73408	251.718	1.09647e-56	1.79782e-54	ENSMUSG00000020462	1.18414	4.59657	230.281	5.17701e-52	8.59809e-50	ENSMUSG00000075033	3.90132
ENSMUSG00000092048	-5.06901	-0.34105	225.579	5.49066e-51	9.37817e-49	ENSMUSG00000095567	0.910428	6.70025	209.101	2.15761e-47	3.74621e-45	ENSMUSG00000045275	1.41592	2.91828	253.791	3.87248e-57	6.75793e-55	ENSMUSG00000023191	0.820158	5.36661	252.105	9.02464e-57	1.6004e-54	ENSMUSG00000068762	2.7948	2.67872	161.7	4.81127e-37	7.59622e-35	ENSMUSG00000038569	-3.46473	0.319834	171.677	3.1838e-39	5.09112e-37	ENSMUSG00000055782	2.72303	4.77711	250.905	1.64901e-56	2.67236e-54	ENSMUSG00000005268	3.63141	4.55886	226.247	3.92401e-51	6.44131e-49	ENSMUSG00000027086	-1.18715
ENSMUSG00000079012	-6.80736	-0.173762	222.084	3.17518e-50	5.36094e-48	ENSMUSG00000028621	1.18354	2.9701	207.129	5.81224e-47	9.97567e-45	ENSMUSG00000062861	-1.09314	3.5342	253.131	5.39331e-57	9.30377e-55	ENSMUSG00000050891	0.767984	4.3133	251.138	1.46659e-56	2.57092e-54	ENSMUSG00000035764	0.952502	5.16699	161.542	5.21022e-37	8.13153e-35	ENSMUSG00000062691	1.09255	4.38514	170.497	5.76181e-39	9.10763e-37	ENSMUSG00000002280	-1.34957	5.14994	250.389	2.1366e-56	3.42274e-54	ENSMUSG00000033111	-1.48788	3.63511	225.05	7.15958e-51	1.16174e-48	ENSMUSG00000055385	8.11716
ENSMUSG00000032625	-0.891249	6.24923	221.584	4.08278e-50	6.81499e-48	ENSMUSG00000001494	2.29469	1.54146	205.131	1.58588e-46	2.69095e-44	ENSMUSG00000050891	0.911062	4.27946	251.517	1.21288e-56	2.06851e-54	ENSMUSG00000022748	0.89882	3.49566	249.181	3.91787e-56	6.78993e-54	ENSMUSG00000047443	-4.7426	0.0791021	160.961	6.97615e-37	1.07639e-34	ENSMUSG00000062329	-2.11873	5.37573	170.18	6.76024e-39	1.05644e-36	ENSMUSG00000070044	1.51779	3.61897	249.811	2.8554e-56	4.52224e-54	ENSMUSG00000038268	-2.38422	2.24533	222.402	2.707e-50	4.34258e-48	ENSMUSG00000041439	1.19598
ENSMUSG00000050856	0.737627	6.73137	218.596	1.83075e-49	3.02156e-47	ENSMUSG00000031198	0.721042	5.83282	204.8	1.87281e-46	3.14212e-44	ENSMUSG00000033538	2.53602	0.233511	250.124	2.44041e-56	4.11525e-54	ENSMUSG00000102018	-3.25277	0.717463	247.362	9.76143e-56	1.67271e-53	ENSMUSG00000045350	-3.82035	-0.554344	160.854	7.36438e-37	1.12352e-34	ENSMUSG00000025170	-2.53118	1.0725	170.136	6.91057e-39	1.0678e-36	ENSMUSG00000000560	4.72968	0.149003	249.557	3.24372e-56	5.07953e-54	ENSMUSG00000019890	-7.84098	0.622695	218.878	1.58886e-49	2.52022e-47	ENSMUSG00000051054	4.26157
ENSMUSG00000068284	-0.574203	6.6918	215.673	7.94876e-49	1.29733e-46	ENSMUSG00000031537	-0.727048	5.65137	203.235	4.11046e-46	6.81971e-44	ENSMUSG00000049608	3.46325	-0.188136	249.593	3.18531e-56	5.31168e-54	ENSMUSG00000035984	1.12107	3.2199	246.792	1.29934e-55	2.20181e-53	ENSMUSG00000033186	1.01215	5.63798	160.589	8.41349e-37	1.26932e-34	ENSMUSG00000031558	-2.64158	3.56174	168.801	1.35216e-38	2.0661e-36	ENSMUSG00000038235	-1.12541	5.86958	248.368	5.89205e-56	9.12417e-54	ENSMUSG00000074505	2.78244	1.55856	214.353	1.5427e-48	2.41981e-46	ENSMUSG00000090171	-3.84335
ENSMUSG00000038717	0.548707	7.11318	215.409	9.07347e-49	1.46462e-46	ENSMUSG00000059005	0.632576	8.51129	200.229	1.86165e-45	3.05474e-43	ENSMUSG00000031958	1.21607	4.51972	247.837	7.69074e-56	1.26838e-53	ENSMUSG00000028845	1.92269	1.58317	244.26	4.63329e-55	7.7651e-53	ENSMUSG00000068417	4.76126	-0.174315	159.119	1.76217e-36	2.62931e-34	ENSMUSG00000033898	4.63686	1.76743	168.11	1.91401e-38	2.89247e-36	ENSMUSG00000102037	5.03836	-1.454	246.631	1.40873e-55	2.15752e-53	ENSMUSG00000058056	0.99324	8.65127	211.917	5.24279e-48	8.13323e-46	ENSMUSG00000053303	2.53636
ENSMUSG00000002043	1.56284	2.75086	214.171	1.69025e-48	2.6987e-46	ENSMUSG00000039178	-0.712587	4.84068	199.574	2.58646e-45	4.19793e-43	ENSMUSG00000025588	2.66121	1.16572	247.314	1.00023e-55	1.63167e-53	ENSMUSG00000033450	-4.21085	2.37096	242.97	8.85596e-55	1.46807e-52	ENSMUSG00000031521	-1.48131	3.83277	158.599	2.28939e-36	3.37884e-34	ENSMUSG00000030346	2.51828	1.55873	168.045	1.97811e-38	2.95685e-36	ENSMUSG00000037697	1.46764	4.98063	244.691	3.73188e-55	5.65339e-53	ENSMUSG00000021226	1.729	6.11136	211.815	5.51861e-48	8.46806e-46	ENSMUSG00000063480	-1.16786
ENSMUSG00000067597	-5.3051	-0.153195	211.561	6.26946e-48	9.90238e-46	ENSMUSG00000049577	-1.17066	4.34787	198.631	4.15419e-45	6.66993e-43	ENSMUSG00000047036	-0.727611	8.07674	244.558	3.98931e-55	6.43781e-53	ENSMUSG00000047117	3.10882	-0.612394	241.856	1.54875e-54	2.53979e-52	ENSMUSG00000064202	1.39949	4.41771	157.723	3.5568e-36	5.19293e-34	ENSMUSG00000042694	1.00442	4.18018	167.597	2.47794e-38	3.66416e-36	ENSMUSG00000015083	-3.48398	0.433607	244.624	3.85959e-55	5.784e-53	ENSMUSG00000095672	5.14025	-0.824639	208.274	3.269e-47	4.9622e-45	ENSMUSG00000028780	-1.52641
ENSMUSG00000060803	1.0052	6.18668	210.365	1.1436e-47	1.78705e-45	ENSMUSG00000035443	-1.03027	4.32793	198.11	5.39978e-45	8.5776e-43	ENSMUSG00000051557	0.868966	4.39383	243.605	6.4355e-55	1.02749e-52	ENSMUSG00000032186	-0.778507	9.1993	240.594	2.91891e-54	4.73578e-52	ENSMUSG00000055923	0.925239	4.38486	155.82	9.26944e-36	1.33894e-33	ENSMUSG00000047250	-2.12353	4.72843	167.381	2.76212e-38	4.04093e-36	ENSMUSG00000025894	-1.07736	4.87231	244.102	5.01501e-55	7.43556e-53	ENSMUSG00000021403	-7.88157	-0.170281	206.788	6.89641e-47	1.03571e-44	ENSMUSG00000051517	-3.37444
ENSMUSG00000026238	0.526919	7.82722	207.899	3.94733e-47	6.1034e-45	ENSMUSG00000020680	0.733951	6.35236	197.933	5.90074e-45	9.27472e-43	ENSMUSG00000016024	-2.70422	2.0239	243.002	8.71313e-55	1.37649e-52	ENSMUSG00000036231	4.35463	0.0598164	240.085	3.76944e-54	6.05135e-52	ENSMUSG00000040569	3.70968	1.86702	154.997	1.40265e-35	2.00476e-33	ENSMUSG00000033233	1.31503	3.29731	166.329	4.68782e-38	6.78599e-36	ENSMUSG00000025893	-1.23023	3.61017	242.106	1.36587e-54	2.0038e-52	ENSMUSG00000022055	3.56716	-0.636106	205.641	1.22743e-46	1.82396e-44	ENSMUSG00000022587	2.53274
ENSMUSG00000010529	1.86565	2.10091	205.269	1.47911e-46	2.26319e-44	ENSMUSG00000034211	-0.85767	5.47338	197.282	8.18476e-45	1.27307e-42	ENSMUSG00000062006	-0.941362	5.75629	242.923	9.06609e-55	1.41733e-52	ENSMUSG00000054226	-1.40849	5.73603	238.442	8.59663e-54	1.3657e-51	ENSMUSG00000049092	1.29026	3.3934	152.444	5.06759e-35	7.16748e-33	ENSMUSG00000043003	2.82379	3.73261	165.968	5.62038e-38	8.05119e-36	ENSMUSG00000026407	-6.09968	3.0545	241.136	2.22329e-54	3.2277e-52	ENSMUSG00000026544	2.19239	3.59273	203.747	3.17905e-46	4.67486e-44	ENSMUSG00000006574	1.50797
ENSMUSG00000090461	5.24653	-0.292473	205.218	1.51789e-46	2.29858e-44	ENSMUSG00000060802	0.968866	5.60426	196.852	1.01578e-44	1.56367e-42	ENSMUSG00000026927	0.70134	6.84514	241.776	1.61264e-54	2.49511e-52	ENSMUSG00000020777	-0.823797	7.20269	237.801	1.18658e-53	1.86562e-51	ENSMUSG00000046828	4.68103	2.07851	150.672	1.2363e-34	1.73057e-32	ENSMUSG00000026158	-1.44489	4.10671	163.895	1.59455e-37	2.26065e-35	ENSMUSG00000022440	-1.8343	4.1415	237.508	1.37453e-53	1.97494e-51	ENSMUSG00000034501	1.25403	3.22014	202.401	6.25089e-46	9.0973e-44	ENSMUSG00000037325	-1.38204
ENSMUSG00000057322	0.58276	6.94416	205.187	1.54174e-46	2.31087e-44	ENSMUSG00000041343	1.07501	4.60955	196.559	1.17688e-44	1.79318e-42	ENSMUSG00000020150	1.22658	3.36704	241.396	1.95142e-54	2.98845e-52	ENSMUSG00000039116	1.20879	2.95862	237.377	1.46752e-53	2.2838e-51	ENSMUSG00000068686	2.42883	1.7666	150.356	1.44902e-34	2.00764e-32	ENSMUSG00000110949	2.42105	2.35401	160.14	1.05476e-36	1.48011e-34	ENSMUSG00000024805	-0.963901	6.2748	236.215	2.62982e-53	3.73997e-51	ENSMUSG00000027942	-1.8555	3.14291	199.726	2.39694e-45	3.45282e-43	ENSMUSG00000074768	-5.83601
ENSMUSG00000064368	2.47382	7.04063	204.853	1.82374e-46	2.70595e-44	ENSMUSG00000033186	0.687848	6.22585	194.827	2.81045e-44	4.23895e-42	ENSMUSG00000028495	-0.767857	6.66537	241.045	2.32726e-54	3.52803e-52	ENSMUSG00000000326	0.990855	6.17687	237.197	1.6065e-53	2.47483e-51	ENSMUSG00000072476	3.94636	-0.323461	149.194	2.60125e-34	3.56765e-32	ENSMUSG00000075273	1.46994	4.42922	159.957	1.15648e-36	1.60646e-34	ENSMUSG00000033715	-3.38351	3.94432	235.671	3.45744e-53	4.86731e-51	ENSMUSG00000057234	1.4475	3.67483	199.561	2.60451e-45	3.71392e-43	ENSMUSG00000027663	-1.14746
ENSMUSG00000021520	0.572889	6.1338	202.882	4.90842e-46	7.20998e-44	ENSMUSG00000062963	0.54981	5.66397	194.799	2.84997e-44	4.25557e-42	ENSMUSG00000026274	1.10827	3.43774	240.906	2.49555e-54	3.74533e-52	ENSMUSG00000040528	3.20169	-0.110737	234.314	6.83346e-53	1.04217e-50	ENSMUSG00000039652	-1.2329	6.57267	147.97	4.81644e-34	6.53977e-32	ENSMUSG00000029059	1.80677	6.37151	159.364	1.55801e-36	2.14257e-34	ENSMUSG00000027438	1.87026	3.05896	235.483	3.79812e-53	5.29344e-51	ENSMUSG00000069792	-10.2498	2.10381	199.537	2.63571e-45	3.72084e-43	ENSMUSG00000028158	-4.24778
ENSMUSG00000033186	0.632027	6.18173	202.373	6.33783e-46	9.16744e-44	ENSMUSG00000022476	-0.896122	4.86892	194.287	3.68612e-44	5.44962e-42	ENSMUSG00000049871	-3.4695	1.55992	239.825	4.29352e-54	6.37991e-52	ENSMUSG00000039347	0.457048	8.29855	234.143	7.4464e-53	1.12441e-50	ENSMUSG00000056598	-2.31043	1.38546	147.214	7.04578e-34	9.47203e-32	ENSMUSG00000044600	0.771091	6.74178	158.989	1.88206e-36	2.56258e-34	ENSMUSG00000024561	1.09443	5.9452	234.669	5.71587e-53	7.88734e-51	ENSMUSG00000048967	-5.51408	1.40742	197.471	7.44454e-45	1.04054e-42	ENSMUSG00000053040	-2.52742
ENSMUSG00000022715	2.7548	1.3311	202.365	6.36584e-46	9.16744e-44	ENSMUSG00000009927	0.560191	7.59121	194.204	3.84326e-44	5.62622e-42	ENSMUSG00000027015	2.39928	3.45324	237.322	1.50904e-53	2.22036e-51	ENSMUSG00000069633	2.15172	1.63412	232.864	1.41531e-52	2.10102e-50	ENSMUSG00000006931	-1.57374	3.96721	143.135	5.49304e-33	7.31221e-31	ENSMUSG00000054083	3.13364	1.33496	158.207	2.78824e-36	3.7592e-34	ENSMUSG00000000884	1.50299	2.8864	231.955	2.23358e-52	3.0519e-50	ENSMUSG00000031958	1.36538	5.60377	197.028	9.29819e-45	1.28689e-42	ENSMUSG00000006395	1.44201
ENSMUSG00000021076	0.564133	6.93223	202.128	7.16964e-46	1.02247e-43	ENSMUSG00000020092	1.05884	4.19133	193.296	6.06511e-44	8.79265e-42	ENSMUSG00000029810	1.23055	4.91275	237.152	1.64332e-53	2.39446e-51	ENSMUSG00000053128	-3.78252	1.48326	232.858	1.41896e-52	2.10102e-50	ENSMUSG00000037826	0.865063	7.6128	141.1	1.53004e-32	2.01698e-30	ENSMUSG00000045350	-5.01872	-0.679258	156.587	6.30113e-36	8.41293e-34	ENSMUSG00000031641	-1.12084	4.92669	231.214	3.23956e-52	4.38347e-50	ENSMUSG00000061171	2.4078	0.480368	195.315	2.19875e-44	3.01357e-42	ENSMUSG00000028456	2.33053
ENSMUSG00000025716	4.72781	-0.383491	201.802	8.44626e-46	1.19295e-43	ENSMUSG00000024521	1.74407	2.54188	192.509	9.00808e-44	1.29335e-41	ENSMUSG00000046991	2.42585	3.06961	235.64	3.51122e-53	5.06697e-51	ENSMUSG00000055541	1.70137	3.21255	230.371	4.94886e-52	7.25722e-50	ENSMUSG00000026087	-0.877194	6.54843	140.989	1.61783e-32	2.1122e-30	ENSMUSG00000034424	0.926851	5.42696	156.398	6.92857e-36	9.16171e-34	ENSMUSG00000031958	1.2922	5.79203	230.28	5.18058e-52	6.94248e-50	ENSMUSG00000042684	2.18223	2.8141	192.804	7.76903e-44	1.05457e-41	ENSMUSG00000021048	1.04618
ENSMUSG00000017778	0.640563	6.52543	201.289	1.09301e-45	1.52907e-43	ENSMUSG00000042210	1.21065	4.22668	192.294	1.00394e-43	1.42769e-41	ENSMUSG00000031812	-0.66767	7.30138	233.907	8.37956e-53	1.19772e-50	ENSMUSG00000039230	0.625958	5.92777	229.241	8.72532e-52	1.26733e-49	ENSMUSG00000054871	-2.56691	1.23522	140.628	1.94016e-32	2.5089e-30	ENSMUSG00000050395	5.81783	1.86552	156.153	7.83789e-36	1.02654e-33	ENSMUSG00000050677	2.38464	1.02862	227.636	1.95366e-51	2.59316e-49	ENSMUSG00000069208	-2.66771	1.95302	192.191	1.0572e-43	1.42138e-41	ENSMUSG00000033685	2.52264
ENSMUSG00000034342	-0.704023	6.82602	200.627	1.52398e-45	2.11187e-43	ENSMUSG00000036073	-0.886406	4.88359	191.904	1.22122e-43	1.72031e-41	ENSMUSG00000087236	3.96291	-0.935851	231.997	2.18727e-52	3.09685e-50	ENSMUSG00000039774	1.67692	1.38182	229.151	9.13023e-52	1.31363e-49	ENSMUSG00000051669	1.59108	4.37285	139.287	3.8112e-32	4.88193e-30	ENSMUSG00000048004	-3.36098	1.72624	155.668	1.00066e-35	1.29821e-33	ENSMUSG00000056666	2.55264	6.59507	226.875	2.86341e-51	3.76484e-49	ENSMUSG00000047996	-1.94175	4.03269	190.771	2.1583e-43	2.87441e-41	ENSMUSG00000057606	4.2337
ENSMUSG00000062997	0.619521	6.23556	198.207	5.14112e-45	7.05775e-43	ENSMUSG00000044348	0.847075	4.61178	191.23	1.71357e-43	2.3913e-41	ENSMUSG00000025269	1.25972	3.30489	231.777	2.44235e-52	3.42568e-50	ENSMUSG00000024869	-3.58169	0.590853	225.999	4.44558e-51	6.3364e-49	ENSMUSG00000029027	-1.20735	2.41802	137.968	7.40736e-32	9.39973e-30	ENSMUSG00000074340	-4.35807	0.0611065	155.604	1.03318e-35	1.32788e-33	ENSMUSG00000019849	1.03952	5.96048	225.906	4.65752e-51	6.06653e-49	ENSMUSG00000029669	1.10257	5.92288	190.596	2.35688e-43	3.10954e-41	ENSMUSG00000001166	-4.57818
ENSMUSG00000072235	-0.574635	8.02875	196.012	1.54934e-44	2.10725e-42	ENSMUSG00000092416	-1.38195	4.83768	190.715	2.21925e-43	3.06832e-41	ENSMUSG00000037306	-1.48945	5.21873	230.93	3.73629e-52	5.19205e-50	ENSMUSG00000026112	0.609591	6.86475	225.346	6.17106e-51	8.71434e-49	ENSMUSG00000022025	-3.05807	-0.12583	137.372	9.99849e-32	1.25703e-29	ENSMUSG00000043088	-2.25352	1.55892	155.401	1.14418e-35	1.45693e-33	ENSMUSG00000052914	2.87315	4.41459	225.332	6.21324e-51	8.01796e-49	ENSMUSG00000024411	-5.44641	2.87081	190.293	2.74328e-43	3.58583e-41	ENSMUSG00000022822	1.70202
ENSMUSG00000025352	0.796941	5.21601	195.239	2.28534e-44	3.07976e-42	ENSMUSG00000068284	-0.560042	6.68936	190.279	2.76301e-43	3.78507e-41	ENSMUSG00000102018	-4.2254	0.698236	228.288	1.40801e-51	1.93866e-49	ENSMUSG00000049871	-2.95603	1.60379	223.775	1.35861e-50	1.90093e-48	ENSMUSG00000021508	-4.20392	4.19773	137.323	1.02483e-31	1.27662e-29	ENSMUSG00000000402	-5.54896	0.35047	154.335	1.95712e-35	2.4692e-33	ENSMUSG00000029253	1.15777	3.78158	223.454	1.59572e-50	2.04032e-48	ENSMUSG00000056124	0.840562	6.07497	189.389	4.32241e-43	5.59811e-41	ENSMUSG00000042606	1.4834
ENSMUSG00000008373	0.537791	5.53015	194.916	2.68716e-44	3.58834e-42	ENSMUSG00000038900	1.42428	6.44396	188.924	5.45915e-43	7.41054e-41	ENSMUSG00000031683	0.705778	5.47852	227.535	2.05593e-51	2.80503e-49	ENSMUSG00000029098	0.819096	5.64205	221.354	4.58091e-50	6.35122e-48	ENSMUSG00000043003	3.18234	3.61879	135.957	2.03945e-31	2.51742e-29	ENSMUSG00000060771	1.36209	3.65698	153.931	2.3979e-35	2.99781e-33	ENSMUSG00000040997	1.12926	6.027	222.111	3.13202e-50	3.96827e-48	ENSMUSG00000039997	1.68983	5.99602	188.537	6.63189e-43	8.51112e-41	ENSMUSG00000036188	0.886637
ENSMUSG00000034211	-0.713896	5.44342	194.732	2.94828e-44	3.90156e-42	ENSMUSG00000024712	0.649608	6.37264	188.734	6.00804e-43	8.08217e-41	ENSMUSG00000020234	3.20297	-0.0229536	226.781	3.00248e-51	4.05956e-49	ENSMUSG00000015377	0.792862	6.63392	221.254	4.8181e-50	6.6199e-48	ENSMUSG00000057897	-1.96792	3.93471	135.031	3.25046e-31	3.9761e-29	ENSMUSG00000005124	-2.96261	1.96289	153.337	3.23329e-35	4.00578e-33	ENSMUSG00000078153	3.74615	2.33812	221.799	3.66446e-50	4.60105e-48	ENSMUSG00000040997	0.927814	6.16799	187.729	9.95779e-43	1.26324e-40	ENSMUSG00000033684	1.46016
ENSMUSG00000061474	0.903807	4.16562	194.664	3.05009e-44	4.00025e-42	ENSMUSG00000069206	0.930947	3.74735	187.106	1.36193e-42	1.81575e-40	ENSMUSG00000029536	-0.743871	4.37344	226.149	4.12286e-51	5.52463e-49	ENSMUSG00000064354	2.20301	4.05131	221.112	5.17508e-50	7.04688e-48	ENSMUSG00000026158	-1.54174	4.28741	134.673	3.89205e-31	4.71841e-29	ENSMUSG00000031521	-1.22588	3.89214	152.721	4.40797e-35	5.41236e-33	ENSMUSG00000025586	-1.53899	3.74813	221.738	3.77889e-50	4.70235e-48	ENSMUSG00000003623	0.93567	5.62947	187.716	1.00222e-42	1.26324e-40	ENSMUSG00000074680	4.74597
ENSMUSG00000040752	-4.84829	-0.677636	194.332	3.6036e-44	4.68436e-42	ENSMUSG00000030177	-1.14264	2.65276	186.433	1.9093e-42	2.52297e-40	ENSMUSG00000006850	-1.53887	2.92504	225.656	5.27994e-51	7.0125e-49	ENSMUSG00000052026	0.72286	6.34653	221.047	5.34469e-50	7.21344e-48	ENSMUSG00000075270	-4.49308	1.26885	132.57	1.12269e-30	1.34902e-28	ENSMUSG00000064360	2.45384	3.78666	151.886	6.70929e-35	8.16515e-33	ENSMUSG00000069208	-3.10032	1.95774	221.326	4.64715e-50	5.73162e-48	ENSMUSG00000027579	2.85404	0.315171	187.081	1.37906e-42	1.72284e-40	ENSMUSG00000076432	0.847315
ENSMUSG00000054074	0.975485	3.78888	192.846	7.60686e-44	9.8015e-42	ENSMUSG00000042831	0.923338	4.79439	183.824	7.08847e-42	9.28465e-40	ENSMUSG00000039230	0.610132	5.92149	224.943	7.55627e-51	9.94776e-49	ENSMUSG00000022191	-0.452811	6.70137	220.856	5.88532e-50	7.87342e-48	ENSMUSG00000027890	1.06949	4.16106	132.002	1.49473e-30	1.78031e-28	ENSMUSG00000056427	-1.87735	5.2775	151.836	6.88119e-35	8.30088e-33	ENSMUSG00000025816	1.03989	4.61901	219.966	9.20041e-50	1.12479e-47	ENSMUSG00000066000	-6.63733	1.30794	186.952	1.47095e-42	1.82153e-40	ENSMUSG00000061887	0.982927
ENSMUSG00000029066	0.632465	5.31573	188.824	5.74134e-43	7.33344e-41	ENSMUSG00000062691	1.00505	3.63476	183.528	8.22454e-42	1.0679e-39	ENSMUSG00000029624	-0.847163	4.71374	222.912	2.09512e-50	2.73423e-48	ENSMUSG00000022369	1.24155	2.27943	216.67	4.81761e-49	6.38899e-47	ENSMUSG00000017692	-1.40756	3.80152	131.828	1.63129e-30	1.92605e-28	ENSMUSG00000035764	0.962505	5.23667	151.229	9.34153e-35	1.11708e-32	ENSMUSG00000087651	-3.34903	0.529219	219.821	9.89471e-50	1.19915e-47	ENSMUSG00000045007	-2.24308	1.45051	186.11	2.24636e-42	2.75755e-40	ENSMUSG00000059663	3.05994
ENSMUSG00000049804	0.448454	7.27728	188.573	6.51374e-43	8.24831e-41	ENSMUSG00000005968	1.50235	3.00214	183.406	8.74684e-42	1.12593e-39	ENSMUSG00000063801	0.476653	6.67764	220.867	5.85145e-50	7.57057e-48	ENSMUSG00000016194	-1.85434	4.2098	213.403	2.48541e-48	3.26767e-46	ENSMUSG00000045625	-2.3032	0.469078	131.409	2.0152e-30	2.35883e-28	ENSMUSG00000062963	0.657079	5.7562	150.95	1.07477e-34	1.27416e-32	ENSMUSG00000003623	0.976359	5.59635	219.432	1.20307e-49	1.44544e-47	ENSMUSG00000014075	1.23547	3.73984	185.972	2.40729e-42	2.92963e-40	ENSMUSG00000031610	8.96075
ENSMUSG00000024654	-0.56875	7.32054	187.301	1.2346e-42	1.55e-40	ENSMUSG00000014551	0.602828	5.51983	183.093	1.02345e-41	1.30617e-39	ENSMUSG00000031302	-0.823902	5.19556	220.809	6.02454e-50	7.72788e-48	ENSMUSG00000057948	2.22175	2.9616	213.025	3.00552e-48	3.91771e-46	ENSMUSG00000060739	-1.08154	4.95161	130.464	3.24409e-30	3.7648e-28	ENSMUSG00000038155	1.91415	3.45935	150.438	1.39039e-34	1.63425e-32	ENSMUSG00000037106	3.38191	2.45671	218.733	1.70893e-49	2.03567e-47	ENSMUSG00000023249	-1.44806	5.2485	184.781	4.38053e-42	5.28547e-40	ENSMUSG00000037788	1.40589
ENSMUSG00000020092	1.09154	4.18954	187.089	1.37341e-42	1.70966e-40	ENSMUSG00000031672	-0.727876	7.29046	183.012	1.06595e-41	1.34888e-39	ENSMUSG00000027942	-1.68207	3.00921	220.59	6.72499e-50	8.55327e-48	ENSMUSG00000063558	-2.44837	3.8372	212.101	4.78145e-48	6.17983e-46	ENSMUSG00000034453	0.878113	4.66304	130.187	3.72972e-30	4.29171e-28	ENSMUSG00000007097	1.46725	9.32434	149.917	1.80777e-34	2.10682e-32	ENSMUSG00000063698	-2.28972	2.52822	218.494	1.92733e-49	2.27637e-47	ENSMUSG00000032452	3.31448	1.70428	183.008	1.06812e-41	1.27785e-39	ENSMUSG00000022763	-1.86489
ENSMUSG00000056598	-1.20672	2.9334	187.012	1.42719e-42	1.76169e-40	ENSMUSG00000022584	-3.61883	-0.353855	182.205	1.59977e-41	2.00738e-39	ENSMUSG00000043664	3.3237	-0.725803	218.653	1.77931e-49	2.24402e-47	ENSMUSG00000044835	-0.791258	6.07788	211.053	8.09314e-48	1.03721e-45	ENSMUSG00000026062	-3.2383	1.86696	130.087	3.92221e-30	4.47527e-28	ENSMUSG00000006800	-1.20044	6.31325	149.65	2.06782e-34	2.38964e-32	ENSMUSG00000032324	0.824331	7.35523	218.441	1.97885e-49	2.31759e-47	ENSMUSG00000057101	-0.865177	4.64367	182.985	1.08058e-41	1.28189e-39	ENSMUSG00000043243	-2.66623
ENSMUSG00000020532	-0.565016	6.49087	185.912	2.48091e-42	3.03684e-40	ENSMUSG00000026238	0.554482	7.8798	180.748	3.32668e-41	4.1395e-39	ENSMUSG00000038122	-1.23268	4.21056	217.905	2.58991e-49	3.23912e-47	ENSMUSG00000027679	-0.851954	3.99158	207.812	4.12306e-47	5.24007e-45	ENSMUSG00000054079	0.844474	4.24806	127.989	1.12848e-29	1.27688e-27	ENSMUSG00000051323	1.30955	4.3836	149.183	2.61507e-34	2.99687e-32	ENSMUSG00000068854	-1.65353	3.16954	217.768	2.77528e-49	3.22326e-47	ENSMUSG00000057880	-3.11818	4.67866	182.043	1.73563e-41	2.04182e-39	ENSMUSG00000027890	2.34849
ENSMUSG00000033488	-1.8263	2.38171	185.223	3.50787e-42	4.25844e-40	ENSMUSG00000027890	1.26065	3.58826	179.969	4.92257e-41	6.0747e-39	ENSMUSG00000042641	-5.46584	-0.322651	217.751	2.79867e-49	3.47127e-47	ENSMUSG00000062006	-1.04052	5.90478	205.721	1.17876e-46	1.48573e-44	ENSMUSG00000027374	0.840554	5.09635	127.856	1.2068e-29	1.35421e-27	ENSMUSG00000030222	1.67527	1.82236	148.565	3.56984e-34	4.05723e-32	ENSMUSG00000028495	-1.0953	7.28088	216.88	4.33468e-49	4.99277e-47	ENSMUSG00000027487	1.14892	4.86753	181.744	2.01703e-41	2.35326e-39	ENSMUSG00000076437	1.91563
ENSMUSG00000026096	1.30736	3.99546	184.134	6.0665e-42	7.30292e-40	ENSMUSG00000027249	4.12746	-0.255817	179.762	5.46336e-41	6.68679e-39	ENSMUSG00000030523	3.08337	-0.547835	216.578	5.04412e-49	6.20509e-47	ENSMUSG00000022404	0.551328	5.01326	205.426	1.36705e-46	1.70893e-44	ENSMUSG00000029086	1.9431	3.6484	125.382	4.19798e-29	4.67214e-27	ENSMUSG00000003161	1.08653	6.25949	148.136	4.43075e-34	4.9944e-32	ENSMUSG00000030805	0.844276	6.40005	215.608	8.21134e-49	9.38045e-47	ENSMUSG00000042246	3.13633	4.36034	180.449	3.86678e-41	4.47437e-39	ENSMUSG00000047719	-1.50068
ENSMUSG00000028788	0.476011	7.1759	184.118	6.11518e-42	7.30292e-40	ENSMUSG00000062382	-5.15722	-0.536566	178.88	8.50969e-41	1.03306e-38	ENSMUSG00000024869	-3.71485	0.67087	216.216	6.04988e-49	7.38184e-47	ENSMUSG00000074476	2.02458	1.47449	204.883	1.79603e-46	2.22693e-44	ENSMUSG00000038526	-1.28735	6.53731	125.193	4.61676e-29	5.09646e-27	ENSMUSG00000068923	-1.09695	3.89966	147.796	5.25762e-34	5.87827e-32	ENSMUSG00000027669	-1.14316	4.47099	215.12	1.04951e-48	1.18918e-46	ENSMUSG00000026170	1.14656	4.7901	179.527	6.14607e-41	7.05399e-39	ENSMUSG00000025036	1.60304
ENSMUSG00000028907	0.710159	4.46979	183.594	7.95749e-42	9.42641e-40	ENSMUSG00000021076	0.589772	6.98478	177.724	1.52207e-40	1.83287e-38	ENSMUSG00000055102	3.64531	-0.355239	214.722	1.28137e-48	1.55087e-46	ENSMUSG00000052144	-0.733213	6.18582	204.564	2.10792e-46	2.59257e-44	ENSMUSG00000044573	0.859999	4.5462	125.161	4.69354e-29	5.13943e-27	ENSMUSG00000000305	2.46142	3.25305	145.898	1.36688e-33	1.51592e-31	ENSMUSG00000020303	1.87174	5.21232	213.052	2.96549e-48	3.33307e-46	ENSMUSG00000031847	2.25592	0.146102	179.479	6.29691e-41	7.16883e-39	ENSMUSG00000049957	-1.58723
ENSMUSG00000074272	-1.97826	1.17094	183.355	8.9719e-42	1.05431e-39	ENSMUSG00000038936	0.766697	6.38307	176.172	3.32091e-40	3.96703e-38	ENSMUSG00000074476	1.97834	1.40726	212.437	4.03739e-48	4.84745e-46	ENSMUSG00000036949	-0.991227	5.85494	204.282	2.4288e-46	2.96333e-44	ENSMUSG00000030911	-3.28521	-0.505542	124.6	6.22465e-29	6.76147e-27	ENSMUSG00000051427	-1.24448	4.18136	145.863	1.39062e-33	1.52991e-31	ENSMUSG00000033111	-1.44874	3.55147	212.955	3.11349e-48	3.47141e-46	ENSMUSG00000019039	-1.22063	4.24373	179.257	7.04296e-41	7.95404e-39	ENSMUSG00000089876	1.1897
ENSMUSG00000033735	0.770781	4.99427	182.975	1.08605e-41	1.26611e-39	ENSMUSG00000045482	-0.468697	7.5494	174.634	7.19552e-40	8.52727e-38	ENSMUSG00000001100	0.529527	6.60866	212.232	4.47691e-48	5.3325e-46	ENSMUSG00000017737	-3.33	-0.0407865	204.085	2.68249e-46	3.24688e-44	ENSMUSG00000079339	-5.62163	0.986549	124.267	7.36553e-29	7.93724e-27	ENSMUSG00000026764	-3.41986	2.69688	145.518	1.65453e-33	1.8058e-31	ENSMUSG00000022054	5.46031	2.12415	212.075	4.84386e-48	5.35785e-46	ENSMUSG00000079598	3.82662	2.00056	178.98	8.09178e-41	9.06601e-39	ENSMUSG00000026765	1.87733
ENSMUSG00000036391	0.799772	5.45199	180.615	3.55798e-41	4.11521e-39	ENSMUSG00000042670	-1.11349	3.47158	173.259	1.43697e-39	1.68952e-37	ENSMUSG00000026664	-0.903413	6.15451	212.153	4.65818e-48	5.50472e-46	ENSMUSG00000020776	-1.02526	5.77952	203.995	2.80579e-46	3.36938e-44	ENSMUSG00000034353	-1.63695	3.03762	124.077	8.10365e-29	8.66388e-27	ENSMUSG00000004035	1.37805	6.22753	144.791	2.38571e-33	2.58333e-31	ENSMUSG00000033044	0.974216	7.62668	211.914	5.2509e-48	5.76234e-46	ENSMUSG00000036377	-3.88907	1.95577	178.824	8.75571e-41	9.73263e-39	ENSMUSG00000035578	2.20801
ENSMUSG00000044968	-1.01224	4.01905	179.676	5.70241e-41	6.54396e-39	ENSMUSG00000005681	5.3489	-0.987786	172.343	2.27696e-39	2.65622e-37	ENSMUSG00000036949	-1.06581	5.82314	211.72	5.78863e-48	6.78717e-46	ENSMUSG00000026274	1.15472	3.44316	201.713	8.83313e-46	1.05245e-43	ENSMUSG00000074797	-0.708601	4.42285	123.344	1.17262e-28	1.2439e-26	ENSMUSG00000033295	-1.87077	4.76198	143.746	4.03761e-33	4.33791e-31	ENSMUSG00000009621	0.875229	5.07121	210.292	1.18614e-47	1.2915e-45	ENSMUSG00000032324	0.863816	7.31976	178.802	8.84888e-41	9.75934e-39	ENSMUSG00000029925	2.30931
ENSMUSG00000032097	0.446436	8.3336	178.813	8.80114e-41	1.00217e-38	ENSMUSG00000034206	-1.94764	1.31545	172.059	2.62729e-39	3.04114e-37	ENSMUSG00000061740	1.82911	6.37763	211.441	6.66006e-48	7.74838e-46	ENSMUSG00000050908	0.758796	5.53307	201.072	1.21896e-45	1.44111e-43	ENSMUSG00000026770	1.73779	1.14156	123.227	1.24396e-28	1.30934e-26	ENSMUSG00000036304	-2.07341	0.723455	143.445	4.6976e-33	5.00786e-31	ENSMUSG00000041144	-4.83298	0.43812	207.854	4.0379e-47	4.3625e-45	ENSMUSG00000027082	1.19871	7.45672	177.277	1.90496e-40	2.08467e-38	ENSMUSG00000024942	1.19647
ENSMUSG00000020268	0.770349	4.53181	178.451	1.05571e-40	1.19288e-38	ENSMUSG00000008373	0.53374	5.56549	171.225	3.9955e-39	4.58929e-37	ENSMUSG00000022748	1.00936	3.42396	209.896	1.44736e-47	1.67092e-45	ENSMUSG00000030472	4.10068	-1.47954	200.055	2.03139e-45	2.38313e-43	ENSMUSG00000047719	-1.04005	4.71189	122.831	1.51858e-28	1.5861e-26	ENSMUSG00000014551	0.994533	5.81118	143.332	4.97237e-33	5.26001e-31	ENSMUSG00000036251	4.15408	-0.970523	206.827	6.7636e-47	7.2511e-45	ENSMUSG00000056091	1.46999	6.36338	176.349	3.03802e-40	3.29906e-38	ENSMUSG00000020639	2.82708
ENSMUSG00000030161	0.50897	9.17762	177.94	1.36499e-40	1.53057e-38	ENSMUSG00000036751	0.568014	7.59093	170.876	4.76277e-39	5.42883e-37	ENSMUSG00000044783	-2.59661	4.10345	208.045	3.66786e-47	4.20208e-45	ENSMUSG00000028256	-0.920251	4.25944	199.148	3.20415e-45	3.73027e-43	ENSMUSG00000006342	-1.74332	0.987459	122.151	2.13936e-28	2.21742e-26	ENSMUSG00000042306	4.12476	0.107016	143.224	5.25155e-33	5.51293e-31	ENSMUSG00000093806	7.12187	0.695474	205.892	1.08155e-46	1.15066e-44	ENSMUSG00000021890	-0.772146	4.8014	174.956	6.12188e-40	6.59714e-38	ENSMUSG00000107283	-0.816066
ENSMUSG00000022898	-0.664808	4.96417	177.481	1.72005e-40	1.91407e-38	ENSMUSG00000046865	0.874591	5.31702	170.612	5.43765e-39	6.15113e-37	ENSMUSG00000050619	-1.91392	3.40314	207.544	4.71777e-47	5.36397e-45	ENSMUSG00000031812	-0.618064	7.28714	198.755	3.90475e-45	4.51146e-43	ENSMUSG00000003161	1.29112	6.15752	121.33	3.23561e-28	3.32826e-26	ENSMUSG00000027374	0.91611	5.13404	142.367	8.08517e-33	8.42328e-31	ENSMUSG00000027679	-1.03813	4.98154	205.513	1.30851e-46	1.38157e-44	ENSMUSG00000017057	0.98495	6.01514	174.651	7.13575e-40	7.63147e-38	ENSMUSG00000045378	6.82845
ENSMUSG00000009145	1.94576	0.998128	176.408	2.94975e-40	3.25781e-38	ENSMUSG00000042198	0.985806	5.53786	170.004	7.38223e-39	8.28808e-37	ENSMUSG00000039116	1.36456	2.90616	207.27	5.41435e-47	6.10967e-45	ENSMUSG00000057219	1.06822	3.60444	198.499	4.44012e-45	5.08238e-43	ENSMUSG00000036192	3.85841	0.349576	121.193	3.46787e-28	3.54035e-26	ENSMUSG00000053469	-3.87049	1.97588	142.265	8.5123e-33	8.80159e-31	ENSMUSG00000022219	-3.60489	1.19413	204.812	1.86159e-46	1.95075e-44	ENSMUSG00000050677	2.31564	0.855388	173.66	1.17439e-39	1.24653e-37	ENSMUSG00000038641	-1.77547
ENSMUSG00000013997	0.597935	5.07878	175.95	3.71404e-40	4.0713e-38	ENSMUSG00000051113	2.07149	3.11273	169.634	8.89421e-39	9.91107e-37	ENSMUSG00000025586	-0.586021	5.82441	206.948	6.36408e-47	7.12777e-45	ENSMUSG00000037134	0.61324	4.98003	198.488	4.46554e-45	5.08238e-43	ENSMUSG00000010608	0.74935	7.0749	121.15	3.54349e-28	3.59056e-26	ENSMUSG00000038552	-2.00262	1.98018	142.197	8.80866e-33	9.04005e-31	ENSMUSG00000006642	2.87262	2.27106	204.382	2.31036e-46	2.40294e-44	ENSMUSG00000020447	2.27935	0.998098	173.388	1.34663e-39	1.41868e-37	ENSMUSG00000031990	-1.58812
ENSMUSG00000027249	3.63126	-0.351607	175.679	4.25635e-40	4.63123e-38	ENSMUSG00000046516	0.572736	5.63687	168.468	1.5986e-38	1.76817e-36	ENSMUSG00000038880	0.796615	5.04097	206.586	7.6318e-47	8.4843e-45	ENSMUSG00000031148	-0.64323	5.58098	198.192	5.17977e-45	5.8516e-43	ENSMUSG00000025170	-2.34261	1.15987	121.134	3.57218e-28	3.59282e-26	ENSMUSG00000059325	1.17497	8.47134	141.424	1.29948e-32	1.32373e-30	ENSMUSG00000028167	3.88956	1.71705	201.117	1.19141e-45	1.22998e-43	ENSMUSG00000002280	-1.45192	5.13012	172.631	1.97049e-39	2.06055e-37	ENSMUSG00000062908	1.32669
ENSMUSG00000042408	0.654332	5.84225	175.365	4.98198e-40	5.38091e-38	ENSMUSG00000044876	0.688204	5.39167	167.965	2.05848e-38	2.26009e-36	ENSMUSG00000021879	1.60364	2.68382	206.436	8.23154e-47	9.08374e-45	ENSMUSG00000021552	0.956793	4.53063	197.189	8.57555e-45	9.6166e-43	ENSMUSG00000091402	-4.85542	-0.699552	120.392	5.19166e-28	5.18327e-26	ENSMUSG00000091679	-8.00143	-0.350727	138.113	6.88375e-32	6.96069e-30	ENSMUSG00000026927	0.685879	6.04506	201.07	1.21975e-45	1.24997e-43	ENSMUSG00000065999	-7.66609	-0.37964	172.312	2.31302e-39	2.40095e-37	ENSMUSG00000051650	1.62731
ENSMUSG00000086784	-1.22344	3.80789	175.3	5.1477e-40	5.51932e-38	ENSMUSG00000020268	0.729292	4.59476	167.048	3.26581e-38	3.55949e-36	ENSMUSG00000020777	-0.804987	7.16574	206.11	9.69708e-47	1.06229e-44	ENSMUSG00000015879	1.04576	4.82547	196.688	1.10302e-44	1.2279e-42	ENSMUSG00000006281	-0.9422	4.70273	120.305	5.42532e-28	5.377e-26	ENSMUSG00000038489	1.17871	5.47094	137.959	7.43938e-32	7.46762e-30	ENSMUSG00000074865	-5.15976	1.93237	200.935	1.30545e-45	1.32804e-43	ENSMUSG00000028411	1.00666	4.78408	170.944	4.60355e-39	4.74367e-37	ENSMUSG00000027485	8.65557
ENSMUSG00000021260	1.12466	4.98405	174.466	7.83063e-40	8.33508e-38	ENSMUSG00000027531	0.616531	5.9971	166.598	4.09484e-38	4.41779e-36	ENSMUSG00000078584	-1.3644	4.82838	204.707	1.96174e-46	2.13346e-44	ENSMUSG00000025082	3.1331	-0.976087	195.436	2.0695e-44	2.2871e-42	ENSMUSG00000054966	-4.07682	-0.774327	120.058	6.14389e-28	6.04505e-26	ENSMUSG00000027890	1.15134	4.32261	136.973	1.22206e-31	1.21781e-29	ENSMUSG00000039252	4.43016	4.554	200.682	1.48242e-45	1.49714e-43	ENSMUSG00000006642	2.99803	2.24589	170.645	5.35045e-39	5.47335e-37	ENSMUSG00000024981	-0.786279
ENSMUSG00000037625	0.71356	6.60738	173.501	1.27246e-39	1.34468e-37	ENSMUSG00000113902	0.793664	5.95784	166.589	4.11246e-38	4.41779e-36	ENSMUSG00000078503	-5.28507	0.636457	203.831	3.04696e-46	3.28984e-44	ENSMUSG00000022102	1.52631	0.788213	195.179	2.35483e-44	2.58371e-42	ENSMUSG00000074206	-7.23235	0.483291	119.768	7.11133e-28	6.94659e-26	ENSMUSG00000091402	-5.20244	0.505257	136.408	1.62458e-31	1.60728e-29	ENSMUSG00000028158	-2.8065	3.10584	199.356	2.88682e-45	2.89451e-43	ENSMUSG00000022219	-3.15586	0.994295	167.802	2.23539e-38	2.27029e-36	ENSMUSG00000054986	2.88217
ENSMUSG00000037646	-0.453207	6.78081	171.812	2.97512e-39	3.12154e-37	ENSMUSG00000022090	1.32209	3.13824	166.495	4.31336e-38	4.60051e-36	ENSMUSG00000027203	0.57805	4.62741	201.902	8.03146e-46	8.60972e-44	ENSMUSG00000006649	1.5951	1.76503	194.785	2.87005e-44	3.12651e-42	ENSMUSG00000071177	4.50797	0.230193	118.915	1.09299e-27	1.06005e-25	ENSMUSG00000026011	2.22657	2.92766	136.113	1.88502e-31	1.85162e-29	ENSMUSG00000021203	1.62808	3.06677	199.07	3.33292e-45	3.31792e-43	ENSMUSG00000051669	-3.96311	4.17729	167.234	2.97447e-38	2.99706e-36	ENSMUSG00000035539	-5.59369
ENSMUSG00000022040	-0.91705	3.71681	171.642	3.24081e-39	3.37619e-37	ENSMUSG00000044442	-0.70251	4.01709	166.431	4.45362e-38	4.71641e-36	ENSMUSG00000022186	-0.613552	8.24377	201.435	1.01567e-45	1.08107e-43	ENSMUSG00000057246	1.85563	2.57375	194.711	2.97873e-44	3.22188e-42	ENSMUSG00000029869	-3.02815	1.84897	117.75	1.96671e-27	1.8939e-25	ENSMUSG00000004031	-4.34149	0.788621	135.902	2.09676e-31	2.04501e-29	ENSMUSG00000095672	4.33903	-0.97577	198.655	4.10516e-45	4.05771e-43	ENSMUSG00000025068	-1.70961	5.87984	167.221	2.99345e-38	2.99706e-36	ENSMUSG00000027761	-1.11017
ENSMUSG00000107906	3.79694	-0.1366	170.57	5.5537e-39	5.74495e-37	ENSMUSG00000046434	0.56894	8.42468	165.823	6.04568e-38	6.35733e-36	ENSMUSG00000024818	-1.78662	1.84103	200.921	1.3145e-45	1.38929e-43	ENSMUSG00000049608	3.10629	-0.353232	194.217	3.81901e-44	4.10167e-42	ENSMUSG00000066975	-1.81292	2.47644	117.655	2.06361e-27	1.97322e-25	ENSMUSG00000050856	0.822003	8.99847	135.398	2.7013e-31	2.61607e-29	ENSMUSG00000021660	-0.97549	6.49273	198.544	4.34126e-45	4.26086e-43	ENSMUSG00000055114	-5.3674	0.436506	166.895	3.52704e-38	3.50642e-36	ENSMUSG00000027422	1.31922
ENSMUSG00000069769	0.567175	7.84333	170.526	5.67812e-39	5.83258e-37	ENSMUSG00000030336	4.95091	-0.817168	162.774	2.80235e-37	2.9262e-35	ENSMUSG00000049109	4.181	-1.09242	200.202	1.88657e-45	1.97998e-43	ENSMUSG00000029064	-0.571447	8.97162	194.108	4.03272e-44	4.30091e-42	ENSMUSG00000026880	-1.20865	5.73387	117.255	2.52429e-27	2.38861e-25	ENSMUSG00000027864	-0.998175	6.36218	134.078	5.25367e-31	5.05234e-29	ENSMUSG00000048234	-1.64776	2.82621	198.281	4.95366e-45	4.82792e-43	ENSMUSG00000019986	1.97773	3.57291	166.531	4.23618e-38	4.18197e-36	ENSMUSG00000051483	-1.66445
ENSMUSG00000024327	1.32304	2.45218	170.51	5.7253e-39	5.8402e-37	ENSMUSG00000039065	-1.01572	4.13325	162.631	3.01214e-37	3.12343e-35	ENSMUSG00000027679	-0.773966	3.97915	199.025	3.40859e-45	3.55251e-43	ENSMUSG00000031302	-0.812075	5.21367	192.499	9.05275e-44	9.58774e-42	ENSMUSG00000035439	1.32919	4.18073	117.248	2.53322e-27	2.38861e-25	ENSMUSG00000055923	0.862473	4.41598	133.933	5.65239e-31	5.39803e-29	ENSMUSG00000047193	1.63455	3.54137	198.002	5.69944e-45	5.51619e-43	ENSMUSG00000036086	1.23268	3.10129	166.22	4.95218e-38	4.85486e-36	ENSMUSG00000025920	0.777027
ENSMUSG00000027236	1.03454	4.94422	170.335	6.25168e-39	6.33317e-37	ENSMUSG00000030652	-0.898387	4.66671	162.219	3.70556e-37	3.81596e-35	ENSMUSG00000074619	4.40754	-1.31405	198.344	4.79954e-45	4.96769e-43	ENSMUSG00000020888	0.746014	4.63555	191.914	1.2149e-43	1.27782e-41	ENSMUSG00000039191	1.02881	4.802	117.053	2.7944e-27	2.61671e-25	ENSMUSG00000050014	-5.22698	-0.434299	133.576	6.76568e-31	6.41666e-29	ENSMUSG00000007034	5.57219	-0.686762	197.532	7.21798e-45	6.93772e-43	ENSMUSG00000052302	2.24638	2.24072	166.066	5.35081e-38	5.20947e-36	ENSMUSG00000042111	1.40861
ENSMUSG00000026070	4.17152	-0.151721	170.128	6.93669e-39	6.97897e-37	ENSMUSG00000022519	-1.69224	2.79833	161.556	5.17195e-37	5.28956e-35	ENSMUSG00000022994	0.635411	6.43631	198.169	5.24034e-45	5.38679e-43	ENSMUSG00000026988	-1.01936	3.30729	191.897	1.22559e-43	1.28023e-41	ENSMUSG00000054169	-4.46291	-0.446451	117.029	2.82844e-27	2.63045e-25	ENSMUSG00000026114	-5.27837	-1.14363	133.334	7.63929e-31	7.19558e-29	ENSMUSG00000026829	-6.638	0.239771	197.416	7.65169e-45	7.30422e-43	ENSMUSG00000028228	1.06922	6.11872	165.938	5.70772e-38	5.5189e-36	ENSMUSG00000036330	1.39884
ENSMUSG00000026895	0.520934	6.27747	169.574	9.16844e-39	9.16158e-37	ENSMUSG00000017778	0.712816	6.56621	160.879	7.27151e-37	7.38627e-35	ENSMUSG00000055560	-3.24787	0.205426	198.149	5.29262e-45	5.40351e-43	ENSMUSG00000079435	0.517557	6.22623	191.839	1.26169e-43	1.30898e-41	ENSMUSG00000027342	-0.864812	4.80476	116.518	3.66023e-27	3.38086e-25	ENSMUSG00000051669	1.36439	4.73951	133.062	8.76112e-31	8.19612e-29	ENSMUSG00000021340	-3.48971	2.18643	196.678	1.1087e-44	1.05115e-42	ENSMUSG00000035649	0.927837	5.5202	165.584	6.81922e-38	6.54877e-36	ENSMUSG00000019945	-1.49452
ENSMUSG00000024414	-0.742321	4.65949	168.823	1.33739e-38	1.32736e-36	ENSMUSG00000074165	-0.564938	5.53868	160.211	1.01765e-36	1.02673e-34	ENSMUSG00000026171	0.45327	5.43269	197.831	6.2113e-45	6.2986e-43	ENSMUSG00000091680	1.8233	2.15153	191.22	1.72231e-43	1.7748e-41	ENSMUSG00000010803	-4.62639	0.0918266	116.376	3.93213e-27	3.60747e-25	ENSMUSG00000020457	0.592147	5.74833	131.367	2.0579e-30	1.90237e-28	ENSMUSG00000038023	-0.813817	6.07072	194.832	2.8029e-44	2.63946e-42	ENSMUSG00000026927	0.677271	6.07079	164.898	9.63079e-38	9.18635e-36	ENSMUSG00000095041	1.69572
ENSMUSG00000025888	-2.48973	1.42816	168.312	1.72926e-38	1.70477e-36	ENSMUSG00000061474	0.822979	4.1489	159.315	1.59674e-36	1.60017e-34	ENSMUSG00000055541	1.7217	3.197	197.631	6.867e-45	6.91677e-43	ENSMUSG00000038352	-2.4922	0.789666	189.913	3.32176e-43	3.40001e-41	ENSMUSG00000029093	-2.15956	3.26054	116.123	4.46714e-27	4.07079e-25	ENSMUSG00000017707	0.66104	9.14388	131.364	2.06118e-30	1.90237e-28	ENSMUSG00000057719	-3.0567	4.6021	194.577	3.18739e-44	2.98138e-42	ENSMUSG00000028488	2.92587	2.66898	163.57	1.87786e-37	1.77918e-35	ENSMUSG00000062184	1.84985
ENSMUSG00000048440	-2.85652	1.55741	167.983	2.04003e-38	1.99773e-36	ENSMUSG00000045136	0.720484	7.27702	159.053	1.82189e-36	1.81364e-34	ENSMUSG00000057103	1.29092	3.54933	197.421	7.63065e-45	7.63472e-43	ENSMUSG00000029624	-0.880887	4.72272	189.867	3.39946e-43	3.45634e-41	ENSMUSG00000048582	-1.1806	3.61116	115.836	5.16347e-27	4.67398e-25	ENSMUSG00000074634	1.90454	3.25059	131.214	2.22332e-30	2.03834e-28	ENSMUSG00000016024	-3.08703	2.49667	194.241	3.77312e-44	3.50573e-42	ENSMUSG00000035849	-2.72921	4.87776	162.682	2.93583e-37	2.763e-35	ENSMUSG00000034211	-0.965186
ENSMUSG00000026051	-1.60941	2.67866	167.85	2.18176e-38	2.12237e-36	ENSMUSG00000028158	-2.06604	3.51005	158.991	1.88023e-36	1.85931e-34	ENSMUSG00000079550	-3.35425	2.43531	197.09	9.01228e-45	8.95737e-43	ENSMUSG00000021645	0.671234	3.91919	189.345	4.41819e-43	4.46237e-41	ENSMUSG00000027601	-0.687805	5.5703	115.769	5.3388e-27	4.80068e-25	ENSMUSG00000054091	0.922636	5.97033	130.667	2.92835e-30	2.66693e-28	ENSMUSG00000058979	0.894876	5.08469	192.482	9.13208e-44	8.42873e-42	ENSMUSG00000057719	-2.57691	4.03666	162.665	2.96061e-37	2.76788e-35	ENSMUSG00000021619	1.15979
ENSMUSG00000063787	0.705619	4.92307	167.776	2.26415e-38	2.18803e-36	ENSMUSG00000017007	-2.47163	0.243196	158.72	2.15453e-36	2.11654e-34	ENSMUSG00000025804	3.99768	0.887725	195.253	2.26884e-44	2.24018e-42	ENSMUSG00000028495	-0.734996	6.6719	189.188	4.78135e-43	4.7974e-41	ENSMUSG00000040219	-2.4581	4.25155	114.887	8.33084e-27	7.44185e-25	ENSMUSG00000092416	-1.10613	3.89151	130.547	3.11108e-30	2.81471e-28	ENSMUSG00000030056	-1.14214	3.4755	192.349	9.76438e-44	8.95304e-42	ENSMUSG00000028016	0.961621	3.86059	161.325	5.81113e-37	5.39709e-35	ENSMUSG00000070695	-5.85748
ENSMUSG00000032743	-0.740709	4.8662	167.626	2.44169e-38	2.34418e-36	ENSMUSG00000036002	0.663338	5.65105	158.116	2.92008e-36	2.84984e-34	ENSMUSG00000044730	0.962235	4.77252	193.978	4.30666e-44	4.22447e-42	ENSMUSG00000031214	-0.533769	5.95712	188.032	8.55065e-43	8.52327e-41	ENSMUSG00000051427	-0.993521	3.88288	114.858	8.45525e-27	7.50362e-25	ENSMUSG00000021213	-2.35178	1.06061	130.409	3.33424e-30	2.99689e-28	ENSMUSG00000005813	0.677992	5.84836	188.056	8.44613e-43	7.6937e-41	ENSMUSG00000111375	1.49608	2.90941	161.253	6.02327e-37	5.55755e-35	ENSMUSG00000038860	2.40048
ENSMUSG00000037894	0.489242	6.5131	166.514	4.27194e-38	4.07471e-36	ENSMUSG00000031448	2.04845	1.45977	157.866	3.31022e-36	3.20962e-34	ENSMUSG00000015970	-2.541	2.24346	193.103	6.68496e-44	6.5148e-42	ENSMUSG00000059089	3.6167	-1.14403	187.685	1.01773e-42	1.00789e-40	ENSMUSG00000117621	-2.24293	1.57091	112.8	2.38641e-26	2.10407e-24	ENSMUSG00000049092	1.31565	3.45242	130.084	3.92841e-30	3.50802e-28	ENSMUSG00000029598	-1.01711	5.85967	187.052	1.39931e-42	1.26637e-40	ENSMUSG00000050989	-0.88203	5.21301	161.039	6.7103e-37	6.15125e-35	ENSMUSG00000070803	4.12762
ENSMUSG00000046865	0.934603	5.28055	166.349	4.64212e-38	4.39924e-36	ENSMUSG00000025266	0.501612	8.14025	156.486	6.62863e-36	6.38572e-34	ENSMUSG00000048478	0.926105	3.17689	192.468	9.19873e-44	8.90675e-42	ENSMUSG00000027015	2.35175	3.74522	186.965	1.46152e-42	1.43805e-40	ENSMUSG00000066537	-2.62123	-0.161485	112.747	2.45139e-26	2.14742e-24	ENSMUSG00000056973	-2.11297	7.51915	129.537	5.17362e-30	4.59017e-28	ENSMUSG00000026806	1.09792	2.914	186.172	2.17792e-42	1.9583e-40	ENSMUSG00000002608	-0.931728	5.45273	160.88	7.26645e-37	6.61809e-35	ENSMUSG00000060459	-1.51878
ENSMUSG00000110195	1.4129	3.46237	166.322	4.70484e-38	4.43009e-36	ENSMUSG00000004626	-0.711452	4.3177	156.062	8.20384e-36	7.85254e-34	ENSMUSG00000021376	1.05007	4.01417	191.019	1.90463e-43	1.83235e-41	ENSMUSG00000061740	1.87185	6.36395	186.473	1.87194e-42	1.83006e-40	ENSMUSG00000028689	2.29284	2.83721	112.302	3.06826e-26	2.67056e-24	ENSMUSG00000027219	1.29394	5.22189	129.464	5.36948e-30	4.7334e-28	ENSMUSG00000055302	-1.37871	6.94549	186.105	2.25256e-42	2.01244e-40	ENSMUSG00000036552	-1.31753	2.33919	160.235	1.00526e-36	9.09692e-35	ENSMUSG00000041313	1.35852
ENSMUSG00000025266	0.449699	8.12816	166.294	4.77157e-38	4.46431e-36	ENSMUSG00000063882	0.57069	7.4392	155.945	8.70308e-36	8.27735e-34	ENSMUSG00000037022	-0.731634	4.79157	190.569	2.38801e-43	2.28276e-41	ENSMUSG00000021548	-1.04449	5.29281	185.404	3.20259e-42	3.111e-40	ENSMUSG00000091474	1.21533	4.42884	112.067	3.45377e-26	2.98696e-24	ENSMUSG00000021719	1.69264	4.32667	129.294	5.84671e-30	5.12127e-28	ENSMUSG00000039634	1.01884	3.25648	185.658	2.81889e-42	2.50235e-40	ENSMUSG00000030518	4.80783	1.21164	160.133	1.05835e-36	9.51637e-35	ENSMUSG00000025075	-3.23914
ENSMUSG00000041343	1.03981	4.59856	166.243	4.89418e-38	4.55004e-36	ENSMUSG00000052934	-0.667243	6.31614	154.128	2.17119e-35	2.05191e-33	ENSMUSG00000022404	0.538064	4.9954	189.891	3.35826e-43	3.18992e-41	ENSMUSG00000033538	2.66052	0.558547	185.322	3.33748e-42	3.22151e-40	ENSMUSG00000027879	0.700561	5.64183	111.432	4.75907e-26	4.08979e-24	ENSMUSG00000003849	1.09163	5.69216	129.232	6.03501e-30	5.25275e-28	ENSMUSG00000022515	0.734415	4.58124	185.632	2.85587e-42	2.51913e-40	ENSMUSG00000062006	-1.88258	6.54	159.276	1.6283e-36	1.45486e-34	ENSMUSG00000021477	1.01458
ENSMUSG00000001383	0.536584	7.36445	165.426	7.3817e-38	6.81948e-36	ENSMUSG00000049804	0.494094	7.32431	154.043	2.26591e-35	2.12796e-33	ENSMUSG00000022102	1.5152	0.8192	189.283	4.5598e-43	4.29063e-41	ENSMUSG00000001773	-1.57772	3.84399	185.157	3.62756e-42	3.47949e-40	ENSMUSG00000029661	-0.803997	7.12349	111.415	4.79892e-26	4.0981e-24	ENSMUSG00000024039	1.89469	3.05068	129.116	6.39656e-30	5.53242e-28	ENSMUSG00000027082	1.40387	7.40929	183.357	8.96159e-42	7.8552e-40	ENSMUSG00000028019	-1.99374	2.74836	159.023	1.85002e-36	1.64257e-34	ENSMUSG00000016349	5.27585
ENSMUSG00000036751	0.530757	7.55389	164.572	1.13446e-37	1.04151e-35	ENSMUSG00000038836	1.03114	4.21115	153.727	2.65758e-35	2.48018e-33	ENSMUSG00000025766	-1.03218	3.72073	189.276	4.57423e-43	4.29063e-41	ENSMUSG00000074619	3.77771	-1.24354	184.786	4.37099e-42	4.16637e-40	ENSMUSG00000021368	-0.982799	3.78385	111.354	4.94985e-26	4.20057e-24	ENSMUSG00000024059	0.897292	7.81588	127.611	1.36568e-29	1.1738e-27	ENSMUSG00000031886	-7.33475	0.506048	183.302	9.21388e-42	8.02587e-40	ENSMUSG00000090523	-1.46884	4.90396	158.576	2.31599e-36	2.04342e-34	ENSMUSG00000037855	-4.86121
ENSMUSG00000039745	1.09154	3.20033	163.98	1.52826e-37	1.39433e-35	ENSMUSG00000013997	0.567976	5.09156	152.491	4.94981e-35	4.59072e-33	ENSMUSG00000042105	-1.06368	7.3087	188.281	7.54377e-43	7.0321e-41	ENSMUSG00000027412	1.66977	0.784232	183.156	9.91508e-42	9.39223e-40	ENSMUSG00000028910	-1.1893	4.10549	111.297	5.09507e-26	4.29695e-24	ENSMUSG00000063253	1.50678	4.87316	126.725	2.13423e-29	1.82297e-27	ENSMUSG00000036264	-5.41512	2.94911	182.524	1.36236e-41	1.17933e-39	ENSMUSG00000062270	-0.678283	7.25386	158.332	2.6185e-36	2.29599e-34	ENSMUSG00000045795	-1.13555
ENSMUSG00000041828	-1.2424	3.13595	162.992	2.51228e-37	2.27796e-35	ENSMUSG00000027131	0.530934	6.10604	152.336	5.35164e-35	4.93275e-33	ENSMUSG00000003623	0.735945	5.15744	187.712	1.00396e-42	9.30088e-41	ENSMUSG00000038298	3.11876	-0.808254	183.124	1.00753e-41	9.48506e-40	ENSMUSG00000037972	-0.843282	5.69029	111.044	5.78849e-26	4.85161e-24	ENSMUSG00000054966	-4.81887	0.406141	126.521	2.36489e-29	2.00753e-27	ENSMUSG00000034683	-6.0603	2.72158	181.731	2.02971e-41	1.74618e-39	ENSMUSG00000032028	-5.55973	1.87706	158.293	2.6707e-36	2.3273e-34	ENSMUSG00000022898	-0.862116
ENSMUSG00000060802	0.930387	5.47883	162.904	2.62571e-37	2.3662e-35	ENSMUSG00000089682	0.459864	7.53397	151.862	6.79266e-35	6.22258e-33	ENSMUSG00000040713	-1.24491	4.91488	187.377	1.18811e-42	1.09394e-40	ENSMUSG00000022186	-0.644907	8.25811	181.669	2.09439e-41	1.9596e-39	ENSMUSG00000017843	-0.658691	6.86221	110.334	8.27834e-26	6.89591e-24	ENSMUSG00000035325	-0.660016	7.01798	126.501	2.38875e-29	2.01534e-27	ENSMUSG00000073633	-3.36829	0.234692	179.373	6.6435e-41	5.68039e-39	ENSMUSG00000026407	-4.86779	2.57702	157.436	4.11078e-36	3.56024e-34	ENSMUSG00000093930	-1.28574
ENSMUSG00000063457	0.602142	7.80411	162.787	2.78399e-37	2.49354e-35	ENSMUSG00000027288	-0.400174	8.5694	149.533	2.19335e-34	1.99702e-32	ENSMUSG00000072720	2.50583	1.77279	186.987	1.44538e-42	1.3227e-40	ENSMUSG00000030868	-0.720599	5.87598	180.922	3.04857e-41	2.83498e-39	ENSMUSG00000022704	1.34473	4.18679	109.424	1.31061e-25	1.08509e-23	ENSMUSG00000035798	0.654315	5.66438	126.308	2.63266e-29	2.20758e-27	ENSMUSG00000057069	2.35797	2.21765	177.683	1.55378e-40	1.32043e-38	ENSMUSG00000029598	-1.0419	5.86509	157.108	4.84682e-36	4.17211e-34	ENSMUSG00000021242	2.58615
ENSMUSG00000049577	-0.88768	4.43291	162.101	3.93164e-37	3.50011e-35	ENSMUSG00000028461	-0.644005	3.89252	148.804	3.16477e-34	2.86402e-32	ENSMUSG00000041144	-2.5506	3.77452	186.4	1.94168e-42	1.7661e-40	ENSMUSG00000030922	1.14071	3.24088	180.739	3.34173e-41	3.08877e-39	ENSMUSG00000057666	-1.00057	10.6197	109.331	1.37345e-25	1.13022e-23	ENSMUSG00000031488	-2.39498	3.7421	125.68	3.61293e-29	3.01121e-27	ENSMUSG00000037306	-2.29218	5.01908	176.677	2.57619e-40	2.17602e-38	ENSMUSG00000039634	1.09265	3.21193	156.978	5.17501e-36	4.42761e-34	ENSMUSG00000040164	4.87638
ENSMUSG00000041879	-0.516532	7.70879	161.8	4.57472e-37	4.04808e-35	ENSMUSG00000074340	-3.72787	1.69711	148.44	3.80151e-34	3.41952e-32	ENSMUSG00000030924	1.53839	1.70502	186.355	1.98616e-42	1.79568e-40	ENSMUSG00000032023	1.63821	1.46116	180.685	3.43526e-41	3.15609e-39	ENSMUSG00000031558	-1.88526	2.86214	108.926	1.68468e-25	1.37799e-23	ENSMUSG00000002808	1.00813	4.83449	125.447	4.0633e-29	3.36618e-27	ENSMUSG00000074604	3.23257	-0.0702608	176.364	3.01521e-40	2.53151e-38	ENSMUSG00000020636	4.33398	-1.29914	156.546	6.43109e-36	5.46914e-34	ENSMUSG00000024749	5.47372
ENSMUSG00000036835	-0.78912	3.90768	161.132	6.40341e-37	5.63231e-35	ENSMUSG00000025278	-0.544	6.88427	148.269	4.14287e-34	3.70427e-32	ENSMUSG00000051502	0.991615	3.26385	185.909	2.48468e-42	2.23293e-40	ENSMUSG00000079550	-3.16331	2.47686	179.478	6.2994e-41	5.75283e-39	ENSMUSG00000030302	2.46925	3.75877	108.678	1.90957e-25	1.55259e-23	ENSMUSG00000020340	-3.14664	4.88606	124.559	6.35697e-29	5.23479e-27	ENSMUSG00000015812	-3.96316	0.105946	175.893	3.82057e-40	3.18846e-38	ENSMUSG00000060675	-0.794484	6.79366	156.289	7.31956e-36	6.18744e-34	ENSMUSG00000053985	-2.21865
ENSMUSG00000063253	1.10733	6.59588	160.561	8.5307e-37	7.45878e-35	ENSMUSG00000107283	-0.577585	4.60379	146.929	8.13169e-34	7.22752e-32	ENSMUSG00000041798	2.18598	2.20664	185.749	2.69369e-42	2.40636e-40	ENSMUSG00000037593	-1.21585	3.4631	179.195	7.264e-41	6.59424e-39	ENSMUSG00000030222	1.50939	1.6821	108.638	1.94782e-25	1.57426e-23	ENSMUSG00000029027	-1.27452	2.61603	124.467	6.65719e-29	5.44939e-27	ENSMUSG00000027284	0.8706	4.86728	175.837	3.93026e-40	3.26048e-38	ENSMUSG00000028167	3.07592	1.71865	156.265	7.40843e-36	6.22528e-34	ENSMUSG00000002324	-3.18742
ENSMUSG00000047719	-0.742619	3.68978	160.083	1.08497e-36	9.43029e-35	ENSMUSG00000054199	-0.554105	5.82629	146.642	9.39836e-34	8.30392e-32	ENSMUSG00000063383	2.23498	0.639943	185.512	3.03373e-42	2.6941e-40	ENSMUSG00000006095	-0.6836	5.53502	179.167	7.36815e-41	6.64921e-39	ENSMUSG00000024661	-0.741458	10.1702	108.432	2.16141e-25	1.73654e-23	ENSMUSG00000035439	1.49095	4.11519	123.901	8.85573e-29	7.20616e-27	ENSMUSG00000057101	-0.976107	4.54891	174.966	6.09036e-40	5.02257e-38	ENSMUSG00000064280	2.25161	3.59619	156.195	7.67512e-36	6.41122e-34	ENSMUSG00000042515	-2.29442
ENSMUSG00000058239	-0.582009	5.76221	159.933	1.17048e-36	1.01137e-34	ENSMUSG00000006418	0.430157	6.20104	146.448	1.036e-33	9.09975e-32	ENSMUSG00000029064	-0.557983	8.99702	184.653	4.67313e-42	4.12555e-40	ENSMUSG00000022300	-0.83387	4.83661	179.015	7.95116e-41	7.13313e-39	ENSMUSG00000037593	2.17475	1.30917	108.023	2.65622e-25	2.12154e-23	ENSMUSG00000042757	-2.36677	3.41458	123.345	1.1721e-28	9.48156e-27	ENSMUSG00000079685	-2.92434	0.997507	174.864	6.41044e-40	5.25543e-38	ENSMUSG00000052144	-0.86112	5.50383	155.3	1.20382e-35	9.99666e-34	ENSMUSG00000005681	2.65647
ENSMUSG00000043419	0.488149	7.5507	159.612	1.37555e-36	1.17856e-34	ENSMUSG00000028426	0.57271	7.80004	146.011	1.2908e-33	1.12715e-31	ENSMUSG00000028159	-1.95978	1.63935	184.478	5.10279e-42	4.47852e-40	ENSMUSG00000031563	-0.557128	5.32266	178.299	1.14e-40	1.01674e-38	ENSMUSG00000026605	-3.54298	4.47003	107.891	2.84001e-25	2.25507e-23	ENSMUSG00000040842	0.670942	6.73737	123.244	1.23319e-28	9.91746e-27	ENSMUSG00000021219	2.20907	5.34074	174.694	6.98227e-40	5.69076e-38	ENSMUSG00000029836	0.689758	5.46354	154.893	1.47795e-35	1.22013e-33	ENSMUSG00000006373	1.23148
ENSMUSG00000017132	0.697906	6.78979	159.605	1.38003e-36	1.17856e-34	ENSMUSG00000024810	1.18123	5.72297	145.909	1.35897e-33	1.17978e-31	ENSMUSG00000020912	-3.42004	1.21123	184.319	5.52534e-42	4.82118e-40	ENSMUSG00000040703	1.26341	2.6774	177.262	1.92023e-40	1.70264e-38	ENSMUSG00000032743	-1.3295	4.23977	107.717	3.10057e-25	2.44765e-23	ENSMUSG00000028795	1.23923	2.88392	123.157	1.28845e-28	1.02918e-26	ENSMUSG00000028555	-3.79959	0.475235	174.519	7.62372e-40	6.17201e-38	ENSMUSG00000034105	1.55421	3.71065	154.51	1.79191e-35	1.47072e-33	ENSMUSG00000068417	3.39665
ENSMUSG00000025780	-1.35477	5.38044	158.186	2.81787e-36	2.39259e-34	ENSMUSG00000027655	-0.809984	4.26923	145.543	1.63396e-33	1.41031e-31	ENSMUSG00000040848	-1.23769	4.94961	183.593	7.96089e-42	6.90619e-40	ENSMUSG00000030924	1.38679	1.73533	176.992	2.19863e-40	1.93823e-38	ENSMUSG00000061080	-1.94839	1.91977	107.516	3.43125e-25	2.69303e-23	ENSMUSG00000040562	-1.3116	6.49588	123.147	1.29471e-28	1.02918e-26	ENSMUSG00000024169	0.925476	3.99686	174.51	7.66132e-40	6.17201e-38	ENSMUSG00000026196	3.34533	3.65454	154.341	1.951e-35	1.59204e-33	ENSMUSG00000001656	3.56307
ENSMUSG00000045136	0.716297	7.23125	157.752	3.50649e-36	2.96017e-34	ENSMUSG00000026031	0.998676	5.39493	145.005	2.14192e-33	1.83811e-31	ENSMUSG00000037139	-2.77237	0.354119	183.465	8.4916e-42	7.32425e-40	ENSMUSG00000022472	-0.620477	6.77142	176.005	3.61136e-40	3.16534e-38	ENSMUSG00000030519	-2.17618	0.0868734	106.933	4.60569e-25	3.59403e-23	ENSMUSG00000021809	-1.19891	3.99821	122.497	1.79723e-28	1.42043e-26	ENSMUSG00000021596	-2.80545	2.46836	173.515	1.26305e-39	1.01168e-37	ENSMUSG00000009621	0.905094	5.21851	154.036	2.27467e-35	1.84549e-33	ENSMUSG00000039252	5.64025
ENSMUSG00000052934	-0.634673	6.43927	157.551	3.88013e-36	3.25687e-34	ENSMUSG00000036403	-0.827379	4.14692	144.786	2.39162e-33	2.04066e-31	ENSMUSG00000031149	-0.637412	4.81186	183.042	1.05008e-41	9.0055e-40	ENSMUSG00000028743	0.758598	4.01985	175.793	4.01902e-40	3.50252e-38	ENSMUSG00000019539	-1.51592	4.62487	106.736	5.08637e-25	3.94644e-23	ENSMUSG00000021280	-1.58032	2.43346	121.189	3.47444e-28	2.73031e-26	ENSMUSG00000021768	4.06644	2.06622	172.474	2.13241e-39	1.69825e-37	ENSMUSG00000034623	3.82189	2.95172	151.986	6.38159e-35	5.14794e-33	ENSMUSG00000054162	-4.34734
ENSMUSG00000073609	-1.11116	3.0439	157.423	4.13641e-36	3.45225e-34	ENSMUSG00000035337	2.43372	-0.246264	143.279	5.10654e-33	4.33244e-31	ENSMUSG00000024885	1.64331	2.58378	182.865	1.14795e-41	9.78891e-40	ENSMUSG00000046991	2.25927	3.01232	174.925	6.21636e-40	5.38669e-38	ENSMUSG00000033845	0.786064	6.27771	106.239	6.53535e-25	5.04187e-23	ENSMUSG00000054871	-3.41732	2.31688	120.692	4.46302e-28	3.48724e-26	ENSMUSG00000037012	-1.26575	7.72897	172.188	2.46222e-39	1.94977e-37	ENSMUSG00000024330	-3.00223	3.36517	151.953	6.48835e-35	5.20432e-33	ENSMUSG00000041343	1.25699
ENSMUSG00000027931	-1.02688	3.39332	156.907	5.36509e-36	4.45242e-34	ENSMUSG00000117679	0.566844	5.66673	143.108	5.56718e-33	4.69656e-31	ENSMUSG00000026940	3.68792	-1.32603	181.085	2.80814e-41	2.38105e-39	ENSMUSG00000024294	-0.584062	7.87459	174.267	8.65474e-40	7.45725e-38	ENSMUSG00000017707	0.701677	9.13511	106.184	6.71813e-25	5.1536e-23	ENSMUSG00000038305	-1.36128	3.02249	120.507	4.89898e-28	3.80626e-26	ENSMUSG00000022586	4.23419	0.431218	172.147	2.51302e-39	1.97875e-37	ENSMUSG00000114865	2.754	-0.645936	151.332	8.86627e-35	7.07148e-33	ENSMUSG00000039878	1.99694
ENSMUSG00000059005	0.52132	8.47584	156.669	6.04643e-36	4.98966e-34	ENSMUSG00000024896	-0.516165	5.06592	142.628	7.08807e-33	5.94601e-31	ENSMUSG00000027490	-1.24336	2.69357	180.555	3.66595e-41	3.09093e-39	ENSMUSG00000042828	1.69804	1.24871	174.23	8.81792e-40	7.55517e-38	ENSMUSG00000027777	1.78721	4.05948	106.149	6.83933e-25	5.2171e-23	ENSMUSG00000068417	3.7888	-0.104302	119.808	6.96807e-28	5.38342e-26	ENSMUSG00000035849	-2.67607	5.1477	171.887	2.8651e-39	2.24331e-37	ENSMUSG00000078931	-3.91391	-0.566702	151.207	9.44386e-35	7.48983e-33	ENSMUSG00000034593	1.38928
ENSMUSG00000020248	-0.660269	4.92633	155.057	1.36061e-35	1.11653e-33	ENSMUSG00000032743	-0.694122	4.83142	142.506	7.5372e-33	6.28745e-31	ENSMUSG00000052727	-0.888136	10.2757	179.412	6.51428e-41	5.4618e-39	ENSMUSG00000031149	-0.629025	4.79296	174.065	9.57939e-40	8.16175e-38	ENSMUSG00000037005	-4.17887	2.4733	105.269	1.06656e-24	8.09036e-23	ENSMUSG00000029156	0.938882	7.85127	119.589	7.78079e-28	5.97773e-26	ENSMUSG00000047246	-1.90588	3.18655	171.853	2.91391e-39	2.26878e-37	ENSMUSG00000027284	0.900726	4.98247	150.945	1.07732e-34	8.49639e-33	ENSMUSG00000030228	-4.60171
ENSMUSG00000031448	2.11849	1.37022	154.536	1.76865e-35	1.44331e-33	ENSMUSG00000054074	0.825488	3.7309	142.361	8.10941e-33	6.7272e-31	ENSMUSG00000027544	1.1098	4.91768	179.157	7.40603e-41	6.17498e-39	ENSMUSG00000005534	-0.720537	6.17607	173.427	1.32037e-39	1.11872e-37	ENSMUSG00000063558	-1.88929	6.45899	104.82	1.3377e-24	1.00907e-22	ENSMUSG00000038463	-1.65975	5.14325	119.355	8.75732e-28	6.69059e-26	ENSMUSG00000032452	3.95804	1.75589	171.783	3.01768e-39	2.33653e-37	ENSMUSG00000032400	1.83202	1.11371	150.825	1.14441e-34	8.97536e-33	ENSMUSG00000055826	4.76421
ENSMUSG00000020014	-1.20865	4.33421	154.408	1.88601e-35	1.53058e-33	ENSMUSG00000034342	-0.706217	6.88327	141.887	1.02924e-32	8.49096e-31	ENSMUSG00000049090	0.612071	5.74828	178.942	8.25113e-41	6.8416e-39	ENSMUSG00000021483	0.736203	4.02854	173.21	1.47231e-39	1.24057e-37	ENSMUSG00000020629	-0.781393	5.53826	104.574	1.51443e-24	1.13607e-22	ENSMUSG00000057897	-1.99602	3.78509	118.949	1.07449e-27	8.16372e-26	ENSMUSG00000074505	2.85022	1.67692	171.418	3.6263e-39	2.79225e-37	ENSMUSG00000006010	0.635239	5.64838	150.795	1.16219e-34	9.06442e-33	ENSMUSG00000000056	1.19206
ENSMUSG00000116358	4.87939	0.046821	153.328	3.24746e-35	2.62099e-33	ENSMUSG00000064351	-0.764538	13.0833	141.833	1.05789e-32	8.67936e-31	ENSMUSG00000034353	-0.625779	5.16956	178.448	1.05746e-40	8.72e-39	ENSMUSG00000038312	-0.662027	4.27735	173.076	1.57531e-39	1.32006e-37	ENSMUSG00000023267	-2.33079	0.672372	104.301	1.73816e-24	1.29675e-22	ENSMUSG00000062382	-6.23707	1.65817	118.788	1.16514e-27	8.80388e-26	ENSMUSG00000021890	-0.765383	4.73407	170.609	5.44707e-39	4.1712e-37	ENSMUSG00000045095	1.04155	5.28925	150.488	1.35618e-34	1.05193e-32	ENSMUSG00000058135	2.14198
ENSMUSG00000014551	0.518425	5.50552	153.146	3.55898e-35	2.85671e-33	ENSMUSG00000042271	0.607381	5.59034	141.505	1.24743e-32	1.01785e-30	ENSMUSG00000003849	1.18904	4.11866	177.956	1.35424e-40	1.11062e-38	ENSMUSG00000027245	1.18351	2.48069	172.927	1.69822e-39	1.41528e-37	ENSMUSG00000042306	3.83104	-0.400424	104.215	1.81532e-24	1.3469e-22	ENSMUSG00000036832	-4.13742	0.741511	118.563	1.30524e-27	9.80857e-26	ENSMUSG00000059412	3.95913	3.7067	170.153	6.85137e-39	5.2179e-37	ENSMUSG00000019849	1.09303	5.93341	150.462	1.37373e-34	1.05972e-32	ENSMUSG00000004768	-1.1919
ENSMUSG00000078552	2.02179	2.0497	153.05	3.73617e-35	2.98264e-33	ENSMUSG00000059412	1.65947	1.76244	141.228	1.43455e-32	1.16417e-30	ENSMUSG00000025758	1.32139	2.66812	176.214	3.25092e-40	2.65162e-38	ENSMUSG00000109293	-6.22853	-0.957583	172.868	1.74871e-39	1.44944e-37	ENSMUSG00000024683	0.652724	5.66827	103.936	2.08987e-24	1.54219e-22	ENSMUSG00000029563	-1.82109	2.27282	118.322	1.47411e-27	1.10174e-25	ENSMUSG00000003484	-4.10868	0.929893	168.8	1.35308e-38	1.02488e-36	ENSMUSG00000040372	2.12462	0.580604	150.029	1.70843e-34	1.31075e-32	ENSMUSG00000032679	-1.39517
ENSMUSG00000037946	0.886137	4.57235	152.519	4.87902e-35	3.87394e-33	ENSMUSG00000057322	0.658886	7.02878	140.879	1.71e-32	1.3802e-30	ENSMUSG00000036046	-0.580421	7.44459	176.181	3.30572e-40	2.68175e-38	ENSMUSG00000029191	0.473106	5.80076	172.828	1.78421e-39	1.47087e-37	ENSMUSG00000034845	-1.82454	5.20891	103.683	2.37364e-24	1.74212e-22	ENSMUSG00000056978	2.87153	3.44177	118.259	1.52184e-27	1.13126e-25	ENSMUSG00000021400	0.906284	5.15209	168.234	1.79822e-38	1.35469e-36	ENSMUSG00000023868	1.34473	3.0909	149.646	2.07218e-34	1.58124e-32	ENSMUSG00000027249	5.22177
ENSMUSG00000000340	-0.65232	4.33701	152.212	5.69634e-35	4.49858e-33	ENSMUSG00000046082	4.79237	-0.746296	140.612	1.9556e-32	1.56995e-30	ENSMUSG00000068758	2.1381	2.61974	175.406	4.8806e-40	3.93806e-38	ENSMUSG00000069808	-1.14541	3.69641	172.776	1.83179e-39	1.50197e-37	ENSMUSG00000020935	-1.32967	4.89525	103.462	2.65382e-24	1.93729e-22	ENSMUSG00000063694	0.964292	9.73608	118.021	1.71588e-27	1.26865e-25	ENSMUSG00000031847	2.02783	0.161811	167.826	2.20766e-38	1.6542e-36	ENSMUSG00000020255	0.76817	4.46512	147.644	5.67458e-34	4.30688e-32	ENSMUSG00000043398	-4.20132
ENSMUSG00000061518	0.533671	7.32073	151.999	6.3397e-35	4.97989e-33	ENSMUSG00000050621	1.19495	2.38601	140.564	2.0038e-32	1.60004e-30	ENSMUSG00000032024	-0.704893	5.46062	174.736	6.83562e-40	5.48605e-38	ENSMUSG00000090356	3.00081	-0.978609	172.296	2.33167e-39	1.90162e-37	ENSMUSG00000021719	1.51442	4.05072	103.231	2.98305e-24	2.16598e-22	ENSMUSG00000020680	0.629598	6.12922	117.904	1.82018e-27	1.33856e-25	ENSMUSG00000021226	1.5639	6.18931	167.291	2.88989e-38	2.15382e-36	ENSMUSG00000026870	-2.56504	0.455803	147.497	6.10961e-34	4.61227e-32	ENSMUSG00000040351	0.927049
ENSMUSG00000030652	-0.938053	4.67958	151.614	7.69443e-35	6.01188e-33	ENSMUSG00000056260	0.795313	4.87462	140.139	2.48158e-32	1.97101e-30	ENSMUSG00000006235	1.28433	2.99433	174.406	8.07226e-40	6.43508e-38	ENSMUSG00000026639	1.46273	2.14161	172.065	2.61966e-39	2.12513e-37	ENSMUSG00000021280	-1.69174	2.1083	102.823	3.66387e-24	2.64617e-22	ENSMUSG00000034845	-2.51966	6.02772	117.815	1.90386e-27	1.39265e-25	ENSMUSG00000044783	-2.85199	3.24263	166.867	3.57696e-38	2.65171e-36	ENSMUSG00000028495	-1.0789	7.4465	147.464	6.21431e-34	4.66636e-32	ENSMUSG00000042540	4.75785
ENSMUSG00000022956	0.540069	6.23864	151.598	7.75497e-35	6.02713e-33	ENSMUSG00000039745	0.960461	3.21781	139.61	3.23901e-32	2.55899e-30	ENSMUSG00000017737	-3.10848	-0.0628284	174.398	8.10388e-40	6.43508e-38	ENSMUSG00000047412	0.876557	5.6734	170.901	4.70305e-39	3.79504e-37	ENSMUSG00000069255	0.821408	4.56631	102.656	3.98607e-24	2.86364e-22	ENSMUSG00000027342	-0.771158	4.88993	117.676	2.04145e-27	1.4854e-25	ENSMUSG00000062270	-0.664386	7.2394	166.773	3.75007e-38	2.76533e-36	ENSMUSG00000041144	-4.82347	0.552688	147.44	6.28884e-34	4.69733e-32	ENSMUSG00000045106	-3.8617
ENSMUSG00000035845	0.759207	3.93376	151.059	1.01743e-34	7.86584e-33	ENSMUSG00000038717	0.546191	7.13089	139.499	3.42576e-32	2.69228e-30	ENSMUSG00000092074	-3.92784	1.44521	173.819	1.08431e-39	8.56494e-38	ENSMUSG00000028159	-1.96749	1.65269	170.738	5.10594e-39	4.09846e-37	ENSMUSG00000049940	0.834253	5.90167	102.521	4.2682e-24	3.05019e-22	ENSMUSG00000026380	-1.9698	1.55669	117.13	2.68856e-27	1.94595e-25	ENSMUSG00000074269	-5.06465	1.09563	166.679	3.9309e-38	2.88342e-36	ENSMUSG00000055302	-1.36976	6.92403	147.349	6.58312e-34	4.89126e-32	ENSMUSG00000021499	3.97487
ENSMUSG00000032526	0.607679	5.21004	149.823	1.89518e-34	1.4575e-32	ENSMUSG00000046364	0.386909	7.43109	139.217	3.94828e-32	3.08668e-30	ENSMUSG00000043929	0.697345	4.58956	173.573	1.22671e-39	9.639e-38	ENSMUSG00000033991	0.575849	5.60825	170.227	6.60057e-39	5.27043e-37	ENSMUSG00000057497	-0.660163	4.54594	102.105	5.26424e-24	3.7423e-22	ENSMUSG00000021136	-1.90813	3.88252	116.473	3.74354e-27	2.69535e-25	ENSMUSG00000030271	1.32285	2.95457	166.4	4.52425e-38	3.30128e-36	ENSMUSG00000009927	-0.895915	7.96326	147.118	7.39652e-34	5.46684e-32	ENSMUSG00000092416	-1.81594
ENSMUSG00000028158	-2.0408	3.46195	149.704	2.01228e-34	1.5395e-32	ENSMUSG00000022956	0.661301	6.31472	139.187	4.00785e-32	3.11694e-30	ENSMUSG00000030929	0.78594	3.51757	172.956	1.67308e-39	1.30779e-37	ENSMUSG00000027203	0.659254	4.63489	170.201	6.68733e-39	5.3119e-37	ENSMUSG00000057265	1.27552	2.8175	101.465	7.27242e-24	5.14296e-22	ENSMUSG00000036098	-2.52078	4.50172	115.627	5.73593e-27	4.10836e-25	ENSMUSG00000067242	-4.69674	1.68841	165.932	5.72556e-38	4.1561e-36	ENSMUSG00000044986	-1.97228	3.56579	146.33	1.09975e-33	8.086e-32	ENSMUSG00000035900	-0.861869
ENSMUSG00000038690	0.550135	6.87085	149.622	2.09738e-34	1.59629e-32	ENSMUSG00000056666	1.67811	4.52604	138.34	6.14202e-32	4.75195e-30	ENSMUSG00000089736	-2.14498	1.49663	172.786	1.82249e-39	1.4172e-37	ENSMUSG00000025804	3.98506	1.07995	169.67	8.73575e-39	6.90305e-37	ENSMUSG00000036832	-3.53167	-0.247566	101.243	8.1379e-24	5.7252e-22	ENSMUSG00000030556	0.943881	3.44542	115.56	5.93265e-27	4.22724e-25	ENSMUSG00000058056	0.903042	8.69756	165.559	6.9059e-38	4.98692e-36	ENSMUSG00000027799	0.76311	5.24334	146.061	1.25866e-33	9.20646e-32	ENSMUSG00000022615	2.92568
ENSMUSG00000027531	0.591229	5.98222	148.237	4.2114e-34	3.18872e-32	ENSMUSG00000118663	-0.934517	3.71075	138.257	6.40424e-32	4.92928e-30	ENSMUSG00000045328	1.37673	1.33161	172.15	2.5102e-39	1.94192e-37	ENSMUSG00000032534	-0.771756	4.9389	168.926	1.26957e-38	9.98055e-37	ENSMUSG00000048652	2.22993	0.929434	100.684	1.07892e-23	7.55135e-22	ENSMUSG00000032743	-1.40438	4.43354	115.448	6.27688e-27	4.44946e-25	ENSMUSG00000021476	-0.876711	5.8922	164.965	9.30794e-38	6.68684e-36	ENSMUSG00000028576	1.47014	2.83817	145.096	2.04668e-33	1.48933e-31	ENSMUSG00000063694	1.24371
ENSMUSG00000005882	0.452373	5.82869	148.184	4.32456e-34	3.25762e-32	ENSMUSG00000016427	0.792275	5.90726	138.187	6.63139e-32	5.07795e-30	ENSMUSG00000026107	0.805768	4.40365	171.806	2.98336e-39	2.29612e-37	ENSMUSG00000031196	1.17341	2.14651	168.2	1.82899e-38	1.43046e-36	ENSMUSG00000035337	2.71563	0.0649654	100.113	1.43946e-23	1.00231e-21	ENSMUSG00000022151	0.640524	5.19825	114.799	8.70812e-27	6.14123e-25	ENSMUSG00000042268	3.81493	-0.233322	164.673	1.07829e-37	7.70676e-36	ENSMUSG00000032625	1.6911	5.05108	145.074	2.06899e-33	1.49785e-31	ENSMUSG00000021809	-1.38481
ENSMUSG00000027447	0.555675	9.66147	146.97	7.96826e-34	5.97172e-32	ENSMUSG00000019178	2.38999	0.0152349	138.154	6.74237e-32	5.13659e-30	ENSMUSG00000030922	1.21246	3.30798	171.006	4.46109e-39	3.41592e-37	ENSMUSG00000110444	-1.08187	4.19746	168.077	1.94623e-38	1.51439e-36	ENSMUSG00000035189	-2.77942	3.09185	99.7235	1.75229e-23	1.2139e-21	ENSMUSG00000064179	1.79214	4.89813	114.588	9.68708e-27	6.79677e-25	ENSMUSG00000020462	0.98292	4.56869	164.662	1.08427e-37	7.70993e-36	ENSMUSG00000042215	0.849905	5.20492	144.877	2.28527e-33	1.64598e-31	ENSMUSG00000003585	-2.05024
ENSMUSG00000063511	0.58451	8.98512	146.488	1.01527e-33	7.57023e-32	ENSMUSG00000038576	-0.518376	6.68424	138.092	6.95628e-32	5.27265e-30	ENSMUSG00000031563	-0.565791	5.31083	170.702	5.19737e-39	3.9595e-37	ENSMUSG00000029403	0.647634	5.76421	167.65	2.41251e-38	1.86768e-36	ENSMUSG00000050211	1.64924	4.04802	99.2527	2.22254e-23	1.53186e-21	ENSMUSG00000026500	0.747073	5.86613	114.413	1.05788e-26	7.38475e-25	ENSMUSG00000028979	-5.38763	-0.065786	164.589	1.12472e-37	7.95694e-36	ENSMUSG00000025937	1.186	5.69788	144.81	2.36269e-33	1.6931e-31	ENSMUSG00000068085	5.83469
ENSMUSG00000024073	-0.449494	7.87006	145.958	1.32597e-33	9.83699e-32	ENSMUSG00000090015	-0.993906	4.84334	138.032	7.16973e-32	5.40699e-30	ENSMUSG00000026604	-0.877303	4.49035	169.737	8.44454e-39	6.40079e-37	ENSMUSG00000038600	2.32736	-0.071836	166.944	3.44139e-38	2.65074e-36	ENSMUSG00000032348	-0.720264	5.94729	98.7031	2.93336e-23	2.01158e-21	ENSMUSG00000004151	-1.5604	4.27989	114.306	1.11653e-26	7.75479e-25	ENSMUSG00000034872	1.50645	3.67728	163.361	2.08657e-37	1.46872e-35	ENSMUSG00000020193	1.54412	1.17976	144.787	2.39085e-33	1.70463e-31	ENSMUSG00000017453	-0.94771
ENSMUSG00000027318	1.55068	3.13616	145.499	1.67094e-33	1.23339e-31	ENSMUSG00000035048	0.745403	4.56969	136.472	1.57351e-31	1.18069e-29	ENSMUSG00000024294	-0.580429	7.8557	169.624	8.94117e-39	6.74317e-37	ENSMUSG00000063801	0.485838	6.68235	166.785	3.72692e-38	2.85625e-36	ENSMUSG00000022887	1.66358	4.41625	98.6706	2.98197e-23	2.03463e-21	ENSMUSG00000040666	1.08241	7.89136	114.212	1.1712e-26	8.09362e-25	ENSMUSG00000110444	-1.12415	3.82117	161.829	4.50925e-37	3.15806e-35	ENSMUSG00000026098	1.03687	3.11144	143.239	5.21245e-33	3.6977e-31	ENSMUSG00000028463	-5.76536
ENSMUSG00000005575	0.417704	6.77737	145.383	1.77092e-33	1.30065e-31	ENSMUSG00000024414	-0.682398	4.64023	135.94	2.05674e-31	1.53556e-29	ENSMUSG00000023968	-2.38959	0.826831	169.204	1.10397e-38	8.28416e-37	ENSMUSG00000055884	-0.928696	4.6659	165.853	5.95744e-38	4.54285e-36	ENSMUSG00000036391	0.84224	5.03758	98.6269	3.04844e-23	2.06958e-21	ENSMUSG00000048218	-2.25775	3.80893	113.95	1.33655e-26	9.19014e-25	ENSMUSG00000015149	0.792374	6.53169	161.81	4.55302e-37	3.17277e-35	ENSMUSG00000021591	1.64803	5.70976	143.076	5.65681e-33	3.99286e-31	ENSMUSG00000042367	4.94652
ENSMUSG00000050043	-0.509974	6.66346	145.237	1.90658e-33	1.39332e-31	ENSMUSG00000043467	-0.614528	5.91337	135.522	2.53891e-31	1.88612e-29	ENSMUSG00000007655	0.964937	4.32655	169.043	1.19715e-38	8.93869e-37	ENSMUSG00000024164	-4.08354	2.82603	165.776	6.19248e-38	4.69859e-36	ENSMUSG00000042988	3.73798	-0.447477	98.207	3.76851e-23	2.54571e-21	ENSMUSG00000026605	-3.65012	4.77112	113.838	1.414e-26	9.67429e-25	ENSMUSG00000045095	1.19634	5.21893	161.631	4.98001e-37	3.45305e-35	ENSMUSG00000021799	-4.94122	1.80992	142.723	6.75872e-33	4.7469e-31	ENSMUSG00000020877	1.09336
ENSMUSG00000006542	-3.15546	1.47408	144.66	2.54818e-33	1.85298e-31	ENSMUSG00000029066	0.62382	5.27076	135.458	2.62161e-31	1.93792e-29	ENSMUSG00000029524	0.80473	4.34611	168.908	1.28157e-38	9.52165e-37	ENSMUSG00000041798	2.15325	2.23292	165.387	7.53031e-38	5.68538e-36	ENSMUSG00000035933	-0.677556	5.84958	97.8815	4.44179e-23	2.98567e-21	ENSMUSG00000035681	-2.86492	1.29076	113.116	2.03536e-26	1.38566e-24	ENSMUSG00000055493	0.820595	5.84341	161.332	5.78986e-37	3.99472e-35	ENSMUSG00000062861	-1.94765	2.6421	142.016	9.64681e-33	6.74178e-31	ENSMUSG00000045034	-2.41646
ENSMUSG00000012405	0.388591	7.02952	144.022	3.51408e-33	2.54278e-31	ENSMUSG00000022194	0.624474	5.72161	135.355	2.76064e-31	2.03064e-29	ENSMUSG00000029471	0.498585	8.31978	168.492	1.57933e-38	1.16762e-36	ENSMUSG00000018449	0.802556	4.00596	165.321	7.78371e-38	5.84775e-36	ENSMUSG00000015980	-1.33734	2.63844	97.4557	5.50735e-23	3.68368e-21	ENSMUSG00000011382	-1.00358	4.76496	112.879	2.29407e-26	1.55409e-24	ENSMUSG00000044724	3.02581	-0.788423	160.989	6.88059e-37	4.72388e-35	ENSMUSG00000078153	3.78159	2.53145	141.813	1.06838e-32	7.42972e-31	ENSMUSG00000033845	1.00195
ENSMUSG00000006418	0.447743	6.25394	143.236	5.21908e-33	3.75799e-31	ENSMUSG00000034292	0.586918	4.8565	135.253	2.90632e-31	2.12732e-29	ENSMUSG00000037287	-0.456242	5.71048	168.428	1.63108e-38	1.19996e-36	ENSMUSG00000021376	1.08132	4.09778	165.301	7.86337e-38	5.87864e-36	ENSMUSG00000075273	1.21258	4.38435	97.1736	6.35078e-23	4.22701e-21	ENSMUSG00000020102	1.91991	4.46151	111.624	4.32028e-26	2.91237e-24	ENSMUSG00000033450	-2.9046	1.96897	160.407	9.21765e-37	6.29737e-35	ENSMUSG00000036693	0.628458	4.64419	140.289	2.30204e-32	1.59304e-30	ENSMUSG00000056130	3.30098
ENSMUSG00000008668	0.454198	6.37627	142.622	7.11147e-33	5.09563e-31	ENSMUSG00000044550	0.687985	6.57909	135.049	3.22195e-31	2.34684e-29	ENSMUSG00000027940	0.574891	6.29975	168.118	1.90649e-38	1.39574e-36	ENSMUSG00000028719	-0.497429	6.28222	165.18	8.35451e-38	6.21534e-36	ENSMUSG00000035236	1.12106	4.59103	97.1598	6.3951e-23	4.23574e-21	ENSMUSG00000029765	-1.14462	6.17284	111.558	4.46611e-26	2.99267e-24	ENSMUSG00000048442	2.01678	4.56956	160.049	1.10375e-36	7.50391e-35	ENSMUSG00000025893	-1.14949	3.6028	140.248	2.34914e-32	1.6177e-30	ENSMUSG00000033533	2.45077
ENSMUSG00000010607	0.81269	3.87052	142.506	7.53598e-33	5.37359e-31	ENSMUSG00000107906	3.74803	-0.240439	134.93	3.41931e-31	2.4785e-29	ENSMUSG00000057181	0.501202	6.50881	168.046	1.97665e-38	1.44008e-36	ENSMUSG00000030701	-1.0934	7.76662	164.445	1.20924e-37	8.95249e-36	ENSMUSG00000020183	-1.80949	1.80689	97.0808	6.65555e-23	4.38685e-21	ENSMUSG00000038764	0.822133	5.90518	111.55	4.48291e-26	2.99267e-24	ENSMUSG00000034783	-8.03038	-0.174068	160.026	1.11676e-36	7.55547e-35	ENSMUSG00000044951	-3.63395	7.53884	139.808	2.93151e-32	2.00894e-30	ENSMUSG00000032112	-0.975069
ENSMUSG00000029208	-0.850978	5.71999	142.468	7.68161e-33	5.45097e-31	ENSMUSG00000029202	-0.524462	6.50281	133.497	7.04061e-31	5.07876e-29	ENSMUSG00000042708	-1.35681	1.73484	167.905	2.12196e-38	1.53847e-36	ENSMUSG00000026730	-1.83417	0.440746	164.385	1.2467e-37	9.18523e-36	ENSMUSG00000002565	-3.24198	-0.385494	96.7316	7.93921e-23	5.20766e-21	ENSMUSG00000035413	-1.37351	4.54473	111.486	4.63152e-26	3.07694e-24	ENSMUSG00000082229	3.44672	-1.34722	159.922	1.17674e-36	7.92279e-35	ENSMUSG00000024558	-4.11534	2.71508	139.534	3.36664e-32	2.29598e-30	ENSMUSG00000042670	-1.01104
ENSMUSG00000064307	1.32164	2.13796	142.356	8.12947e-33	5.73105e-31	ENSMUSG00000020248	-0.644395	4.98232	133.48	7.09943e-31	5.09657e-29	ENSMUSG00000069633	1.94123	1.57974	167.781	2.25899e-38	1.62995e-36	ENSMUSG00000026664	-1.06427	6.15058	162.793	2.77562e-37	2.03514e-35	ENSMUSG00000035798	0.575106	5.60856	95.8328	1.2501e-22	8.1605e-21	ENSMUSG00000109564	-2.00085	5.34063	111.393	4.85404e-26	3.20927e-24	ENSMUSG00000079036	0.941605	3.87024	159.619	1.37043e-36	9.18254e-35	ENSMUSG00000038217	-3.20705	1.78885	138.612	5.3546e-32	3.63418e-30	ENSMUSG00000032997	0.949863
ENSMUSG00000035337	2.89229	-0.220821	142.35	8.15432e-33	5.73105e-31	ENSMUSG00000028936	0.41868	6.40366	133.399	7.39501e-31	5.28336e-29	ENSMUSG00000091680	1.62951	2.14188	167.547	2.54123e-38	1.82482e-36	ENSMUSG00000042641	-5.0971	-0.607367	162.623	3.02393e-37	2.2066e-35	ENSMUSG00000004035	1.2206	6.17072	95.7956	1.27378e-22	8.2753e-21	ENSMUSG00000051550	-1.68393	4.95295	111.261	5.18624e-26	3.41249e-24	ENSMUSG00000090523	-1.61623	4.85155	159.58	1.39788e-36	9.32167e-35	ENSMUSG00000058407	-0.649469	5.4502	138.24	6.45678e-32	4.36126e-30	ENSMUSG00000058057	5.35052
ENSMUSG00000044876	0.592987	5.41139	142.117	9.16664e-33	6.41185e-31	ENSMUSG00000030079	-0.5742	4.44281	133.31	7.73529e-31	5.50016e-29	ENSMUSG00000021548	-1.01245	5.24031	167.42	2.70791e-38	1.93525e-36	ENSMUSG00000025766	-1.16725	3.81203	162.017	4.10251e-37	2.96572e-35	ENSMUSG00000044600	0.620099	6.64973	95.7244	1.32045e-22	8.53763e-21	ENSMUSG00000028583	-1.70767	3.71599	110.016	9.718e-26	6.3639e-24	ENSMUSG00000060675	-0.842106	6.9206	159.555	1.41535e-36	9.39318e-35	ENSMUSG00000025894	-1.00046	4.80832	138.151	6.7527e-32	4.53942e-30	ENSMUSG00000003038	1.08964
ENSMUSG00000003660	-0.387373	7.59194	141.942	1.00126e-32	6.9704e-31	ENSMUSG00000028788	0.475667	7.20205	133.139	8.43003e-31	5.96575e-29	ENSMUSG00000026617	-0.508709	5.75026	167.133	3.12803e-38	2.2249e-36	ENSMUSG00000091387	-1.27282	3.37195	162.016	4.10312e-37	2.96572e-35	ENSMUSG00000030513	-0.922975	6.0306	95.1968	1.7237e-22	1.10817e-20	ENSMUSG00000001930	-1.75292	7.96205	109.968	9.95621e-26	6.489e-24	ENSMUSG00000040312	1.31622	2.67407	159.293	1.61469e-36	1.06654e-34	ENSMUSG00000031886	-6.92657	0.962237	138.087	6.97542e-32	4.66692e-30	ENSMUSG00000026615	0.776565
ENSMUSG00000042198	0.969044	5.5746	140.182	2.42876e-32	1.68283e-30	ENSMUSG00000037437	2.51434	0.493287	133.018	8.95888e-31	6.31009e-29	ENSMUSG00000011154	1.39561	1.21973	166.97	3.39558e-38	2.40382e-36	ENSMUSG00000089736	-1.8108	1.55684	161.852	4.45738e-37	3.20658e-35	ENSMUSG00000037990	-1.52349	0.309171	95.1893	1.73024e-22	1.10817e-20	ENSMUSG00000035000	-2.03947	4.8495	109.829	1.0681e-25	6.92853e-24	ENSMUSG00000034621	0.758617	5.92046	158.944	1.92462e-36	1.26526e-34	ENSMUSG00000051817	1.0669	4.26036	137.851	7.8553e-32	5.23081e-30	ENSMUSG00000040441	2.19999
ENSMUSG00000002326	0.564274	4.48851	139.062	4.26837e-32	2.93517e-30	ENSMUSG00000057092	3.23768	-0.0255227	132.945	9.29495e-31	6.51606e-29	ENSMUSG00000045827	-0.92006	3.21837	166.89	3.53486e-38	2.49067e-36	ENSMUSG00000020150	1.28575	3.31483	161.815	4.53954e-37	3.25036e-35	ENSMUSG00000070713	-1.65537	1.36	94.8434	2.06054e-22	1.31352e-20	ENSMUSG00000033965	-1.13964	4.3776	109.728	1.12382e-25	7.25574e-24	ENSMUSG00000031568	0.757848	5.73176	158.21	2.784e-36	1.82162e-34	ENSMUSG00000020435	1.55601	5.12826	137.656	8.66468e-32	5.74269e-30	ENSMUSG00000036298	1.36502
ENSMUSG00000020263	-0.869623	7.14864	139.057	4.28028e-32	2.93517e-30	ENSMUSG00000001166	-3.47907	-0.707608	132.888	9.56674e-31	6.67526e-29	ENSMUSG00000004056	-0.627308	6.47583	166.291	4.77886e-38	3.35145e-36	ENSMUSG00000030972	2.97391	2.30453	161.291	5.90955e-37	4.21152e-35	ENSMUSG00000058900	1.92125	1.71966	94.3681	2.61975e-22	1.66219e-20	ENSMUSG00000024164	-1.94917	9.23732	109.658	1.16455e-25	7.48363e-24	ENSMUSG00000028164	0.939827	5.02327	156.098	8.0566e-36	5.24695e-34	ENSMUSG00000031382	-1.89559	6.58857	137.282	1.04615e-31	6.90116e-30	ENSMUSG00000014551	0.873662
ENSMUSG00000014313	0.60993	7.33734	139.049	4.29616e-32	2.93517e-30	ENSMUSG00000071748	2.44866	0.0899418	132.455	1.18991e-30	8.26403e-29	ENSMUSG00000080717	-0.81503	3.61	166.175	5.0663e-38	3.53652e-36	ENSMUSG00000030792	-3.39981	1.7548	160.975	6.92941e-37	4.91537e-35	ENSMUSG00000021591	-0.884646	4.91264	94.1987	2.85389e-22	1.80233e-20	ENSMUSG00000026179	0.971836	6.23959	109.332	1.37254e-25	8.77915e-24	ENSMUSG00000048967	-5.67655	1.17216	156.05	8.25628e-36	5.35199e-34	ENSMUSG00000038023	-0.76226	6.07639	135.943	2.053e-31	1.34801e-29	ENSMUSG00000035561	3.7239
ENSMUSG00000021147	-0.425766	6.54653	138.887	4.66343e-32	3.17135e-30	ENSMUSG00000020738	0.475738	6.06823	132.285	1.29598e-30	8.95908e-29	ENSMUSG00000021645	0.610491	3.86049	165.848	5.97157e-38	4.14914e-36	ENSMUSG00000070471	-4.13405	0.628981	160.943	7.04026e-37	4.97088e-35	ENSMUSG00000068923	-0.959514	3.73631	94.1301	2.95445e-22	1.8572e-20	ENSMUSG00000020253	-1.22737	3.93747	109.28	1.40905e-25	8.97092e-24	ENSMUSG00000015944	1.46452	6.53269	155.483	1.09809e-35	7.08522e-34	ENSMUSG00000060314	2.73405	1.6932	135.418	2.67477e-31	1.74814e-29	ENSMUSG00000031023	-1.29605
ENSMUSG00000058488	-1.06453	4.81845	138.384	6.0065e-32	4.04952e-30	ENSMUSG00000022715	2.61813	1.20402	132.123	1.40642e-30	9.6777e-29	ENSMUSG00000048602	-2.55337	0.906281	164.851	9.85767e-38	6.81769e-36	ENSMUSG00000014077	-0.449816	6.84819	160.504	8.78213e-37	6.17218e-35	ENSMUSG00000040272	-1.13613	2.57822	94.0784	3.03267e-22	1.89759e-20	ENSMUSG00000028689	1.93964	2.91128	108.575	2.0112e-25	1.27456e-23	ENSMUSG00000075706	-0.996498	8.21915	155.274	1.21985e-35	7.83456e-34	ENSMUSG00000041935	0.665039	6.09019	134.002	5.45932e-31	3.55158e-29	ENSMUSG00000066637	1.25324
ENSMUSG00000017747	0.854445	3.4608	138.383	6.00991e-32	4.04952e-30	ENSMUSG00000017679	-0.463761	6.09294	131.778	1.67295e-30	1.14589e-28	ENSMUSG00000026407	-1.8661	0.974684	164.268	1.32188e-37	9.10036e-36	ENSMUSG00000006818	-0.930387	7.44609	159.371	1.55264e-36	1.08621e-34	ENSMUSG00000028278	0.929298	7.27224	93.9515	3.23348e-22	2.01396e-20	ENSMUSG00000057265	1.38047	2.65766	108.406	2.1901e-25	1.38157e-23	ENSMUSG00000054206	-1.93149	2.39361	154.945	1.43947e-35	9.20272e-34	ENSMUSG00000089736	-2.45158	0.807216	133.614	6.63767e-31	4.29835e-29	ENSMUSG00000033342	3.77599
ENSMUSG00000024404	0.529699	6.95593	138.121	6.85624e-32	4.59869e-30	ENSMUSG00000029121	-0.440799	7.34354	131.658	1.77726e-30	1.21179e-28	ENSMUSG00000033991	0.646473	5.57514	164.192	1.37362e-37	9.41335e-36	ENSMUSG00000001323	-0.749321	6.25654	158.952	1.91742e-36	1.33527e-34	ENSMUSG00000045667	-1.29608	3.54523	92.7208	6.02175e-22	3.73348e-20	ENSMUSG00000063652	1.7225	1.71291	108.325	2.28072e-25	1.43217e-23	ENSMUSG00000029591	-1.7355	4.15134	154.69	1.63623e-35	1.04128e-33	ENSMUSG00000075376	0.733577	5.80591	133.526	6.93508e-31	4.47044e-29	ENSMUSG00000061119	-1.21055
ENSMUSG00000006392	0.574952	4.13702	137.963	7.42416e-32	4.95698e-30	ENSMUSG00000063253	1.29287	6.57764	131.148	2.29779e-30	1.55957e-28	ENSMUSG00000035878	-1.73275	2.3653	163.936	1.56244e-37	1.06587e-35	ENSMUSG00000078580	0.974363	3.00134	158.589	2.30096e-36	1.59509e-34	ENSMUSG00000043991	0.51465	5.18701	92.3975	7.09032e-22	4.37602e-20	ENSMUSG00000024730	2.00259	1.31669	107.892	2.83901e-25	1.77464e-23	ENSMUSG00000026650	-6.65773	-0.107764	154.547	1.75869e-35	1.11413e-33	ENSMUSG00000033735	-1.74912	5.52231	133.453	7.19761e-31	4.61858e-29	ENSMUSG00000043621	-3.37139
ENSMUSG00000061740	-0.744553	5.47702	137.842	7.89164e-32	5.24526e-30	ENSMUSG00000052616	2.06766	1.60046	130.589	3.04624e-30	2.05821e-28	ENSMUSG00000074733	-1.1197	5.5052	162.707	2.89951e-37	1.96905e-35	ENSMUSG00000030523	2.59618	-0.623225	158.142	2.88111e-36	1.98823e-34	ENSMUSG00000041817	2.16363	1.53966	92.2809	7.52056e-22	4.62055e-20	ENSMUSG00000030826	1.20439	7.34813	107.863	2.87978e-25	1.79198e-23	ENSMUSG00000026479	1.40556	4.56185	153.765	2.60603e-35	1.64345e-33	ENSMUSG00000021596	-2.54859	2.63605	133.306	7.75155e-31	4.95152e-29	ENSMUSG00000064105	0.892481
ENSMUSG00000025436	1.18405	3.26921	137.674	8.58995e-32	5.68368e-30	ENSMUSG00000027332	0.764082	6.64462	130.569	3.07707e-30	2.06968e-28	ENSMUSG00000028167	1.52832	1.96371	161.498	5.32598e-37	3.60056e-35	ENSMUSG00000029322	3.06769	-0.240168	157.849	3.33943e-36	2.29413e-34	ENSMUSG00000030346	1.76837	1.36346	91.97	8.80017e-22	5.38238e-20	ENSMUSG00000042453	-1.59069	4.21082	107.596	3.29565e-25	2.04152e-23	ENSMUSG00000061414	-2.2456	1.93439	153.167	3.5222e-35	2.21121e-33	ENSMUSG00000019806	0.80959	5.01062	132.973	9.16378e-31	5.82726e-29	ENSMUSG00000060636	0.827387
ENSMUSG00000090015	-0.901455	4.74756	137.651	8.6889e-32	5.72337e-30	ENSMUSG00000071014	0.537235	5.59965	130.395	3.35828e-30	2.24869e-28	ENSMUSG00000034371	0.785903	3.46793	161.321	5.82073e-37	3.91738e-35	ENSMUSG00000020424	1.11945	1.24098	157.304	4.39369e-36	3.00485e-34	ENSMUSG00000030329	2.31419	1.06425	91.5569	1.08428e-21	6.60196e-20	ENSMUSG00000024683	0.869157	5.65279	107.527	3.41179e-25	2.10399e-23	ENSMUSG00000045007	-2.10369	1.22923	153.011	3.80997e-35	2.38114e-33	ENSMUSG00000063808	0.823073	4.08109	132.48	1.17483e-30	7.43728e-29	ENSMUSG00000041736	1.12442
ENSMUSG00000045795	-0.933202	4.12796	137.295	1.0393e-31	6.81529e-30	ENSMUSG00000035505	-0.810342	3.21633	130.344	3.44543e-30	2.29675e-28	ENSMUSG00000001323	-0.6255	6.23743	161.086	6.55102e-37	4.38918e-35	ENSMUSG00000028293	-0.725291	4.16178	157.128	4.79835e-36	3.26695e-34	ENSMUSG00000027792	-1.12163	5.87052	91.3882	1.18079e-21	7.1575e-20	ENSMUSG00000053024	-4.03483	4.16586	107.512	3.43829e-25	2.11086e-23	ENSMUSG00000062006	-1.45139	6.25293	152.566	4.76568e-35	2.96514e-33	ENSMUSG00000050627	0.760369	6.82584	132.112	1.41396e-30	8.91112e-29	ENSMUSG00000030994	3.50646
ENSMUSG00000013878	-0.6077	4.84442	137.202	1.08912e-31	7.11026e-30	ENSMUSG00000072235	-0.56372	8.07581	129.306	5.8132e-30	3.8579e-28	ENSMUSG00000057948	1.93621	2.78636	159.793	1.25568e-36	8.37565e-35	ENSMUSG00000033036	2.78898	-1.0046	157.05	4.9921e-36	3.38376e-34	ENSMUSG00000044951	1.38765	8.27474	91.375	1.18867e-21	7.17325e-20	ENSMUSG00000040146	-1.50928	2.9893	107.115	4.20038e-25	2.56727e-23	ENSMUSG00000008763	0.716602	5.78182	151.991	6.36364e-35	3.94178e-33	ENSMUSG00000025232	-0.803857	5.94647	132.072	1.44293e-30	9.05327e-29	ENSMUSG00000025510	1.00081
ENSMUSG00000117679	0.660359	5.71415	137.028	1.18869e-31	7.72598e-30	ENSMUSG00000022671	0.851904	4.04041	128.988	6.82334e-30	4.50824e-28	ENSMUSG00000057228	2.22468	-0.406759	159.74	1.28955e-36	8.56355e-35	ENSMUSG00000021226	1.78789	2.69885	156.41	6.88941e-36	4.64913e-34	ENSMUSG00000047843	-1.06823	5.40038	91.1598	1.32524e-21	7.96199e-20	ENSMUSG00000010803	-3.83554	-0.193489	107.068	4.30118e-25	2.61725e-23	ENSMUSG00000037022	-0.989919	5.21708	151.589	7.79326e-35	4.80596e-33	ENSMUSG00000039929	0.789396	4.18233	131.694	1.74569e-30	1.09044e-28	ENSMUSG00000020115	-0.940673
ENSMUSG00000020738	0.51175	6.06583	136.744	1.37192e-31	8.8776e-30	ENSMUSG00000042712	0.391875	5.82104	127.257	1.63245e-29	1.07382e-27	ENSMUSG00000038352	-2.83669	0.750617	159.563	1.40944e-36	9.31845e-35	ENSMUSG00000052605	1.82926	2.94288	155.396	1.14751e-35	7.70953e-34	ENSMUSG00000027550	1.78451	4.23661	91.1192	1.35275e-21	8.09149e-20	ENSMUSG00000034063	2.05251	1.02269	106.523	5.6638e-25	3.43122e-23	ENSMUSG00000032549	-3.18744	0.960502	151.312	8.95705e-35	5.49931e-33	ENSMUSG00000003541	-1.97557	3.73354	130.874	2.63845e-30	1.64084e-28	ENSMUSG00000045662	4.47339
ENSMUSG00000021519	1.03859	4.66418	136.735	1.3783e-31	8.87974e-30	ENSMUSG00000033417	0.44168	6.11688	127.113	1.75469e-29	1.14917e-27	ENSMUSG00000062762	0.408474	6.96155	159.355	1.56561e-36	1.03055e-34	ENSMUSG00000057103	1.30755	3.7483	154.828	1.52679e-35	1.02127e-33	ENSMUSG00000057606	1.81537	4.87769	90.8283	1.56693e-21	9.33151e-20	ENSMUSG00000086587	-3.71599	-0.371931	106.393	6.04846e-25	3.64818e-23	ENSMUSG00000020309	0.924974	4.67512	150.958	1.07051e-34	6.54372e-33	ENSMUSG00000027787	0.780934	4.70475	130.779	2.76835e-30	1.71407e-28	ENSMUSG00000070034	-1.84071
ENSMUSG00000095041	2.84056	10.4435	136.464	1.57977e-31	1.01333e-29	ENSMUSG00000059588	1.14359	3.61447	126.931	1.92374e-29	1.25438e-27	ENSMUSG00000071531	0.975358	3.73437	158.871	1.99708e-36	1.30883e-34	ENSMUSG00000030706	-0.530449	5.50848	154.65	1.66978e-35	1.11205e-33	ENSMUSG00000021814	-0.798548	6.13802	90.6848	1.68486e-21	9.98999e-20	ENSMUSG00000064202	1.5315	4.44201	106.123	6.93053e-25	4.16195e-23	ENSMUSG00000056941	0.927598	4.27626	149.77	1.94675e-34	1.1848e-32	ENSMUSG00000016637	-1.45591	2.94469	130.508	3.1728e-30	1.95591e-28	ENSMUSG00000031200	-1.43091
ENSMUSG00000034681	0.912277	6.18519	136.427	1.60913e-31	1.02767e-29	ENSMUSG00000033735	0.858931	4.88942	126.851	2.00303e-29	1.3004e-27	ENSMUSG00000039457	1.84149	2.86637	158.662	2.21768e-36	1.44708e-34	ENSMUSG00000035831	2.91038	1.29064	154.513	1.78932e-35	1.18647e-33	ENSMUSG00000062691	0.776829	4.39252	90.6435	1.72033e-21	1.01559e-19	ENSMUSG00000002741	0.55468	6.62497	106.025	7.2802e-25	4.35293e-23	ENSMUSG00000028191	0.706166	4.65706	149.417	2.32505e-34	1.40888e-32	ENSMUSG00000044349	6.01389	4.32328	130.378	3.38766e-30	2.07929e-28	ENSMUSG00000045871	-4.63213
ENSMUSG00000033417	0.452674	6.1075	135.614	2.42364e-31	1.54116e-29	ENSMUSG00000047369	1.55622	1.84417	126.676	2.18674e-29	1.41352e-27	ENSMUSG00000025894	-0.723382	4.90465	158.532	2.36759e-36	1.53822e-34	ENSMUSG00000090206	2.25071	-0.182782	154.499	1.80162e-35	1.18946e-33	ENSMUSG00000054675	-1.74363	2.62576	90.4405	1.90624e-21	1.12047e-19	ENSMUSG00000060803	0.842594	6.44841	105.928	7.64753e-25	4.55277e-23	ENSMUSG00000045733	-5.64391	-0.185991	148.696	3.3415e-34	2.01604e-32	ENSMUSG00000021555	0.833037	6.10304	130.148	3.80258e-30	2.32385e-28	ENSMUSG00000031803	2.35761
ENSMUSG00000034035	1.61339	2.08224	135.351	2.76603e-31	1.7513e-29	ENSMUSG00000027677	-0.473298	7.83804	126.601	2.27155e-29	1.46202e-27	ENSMUSG00000070306	1.14403	2.67078	157.918	3.22547e-36	2.08655e-34	ENSMUSG00000000983	2.11639	-0.186607	154.197	2.0972e-35	1.37864e-33	ENSMUSG00000034910	-0.852025	5.13395	89.6377	2.86015e-21	1.67393e-19	ENSMUSG00000021904	1.7456	4.99725	105.696	8.59533e-25	5.09496e-23	ENSMUSG00000050840	2.21714	3.07831	148.254	4.1753e-34	2.50824e-32	ENSMUSG00000074269	-5.72606	1.88041	130.067	3.96094e-30	2.40315e-28	ENSMUSG00000027695	1.13991
ENSMUSG00000015806	0.906162	7.51338	134.943	3.39857e-31	2.14256e-29	ENSMUSG00000002326	0.559311	4.58449	126.362	2.56231e-29	1.64208e-27	ENSMUSG00000022438	-0.947873	4.50422	157.654	3.68279e-36	2.37216e-34	ENSMUSG00000042105	-0.973112	7.28199	153.69	2.70759e-35	1.77225e-33	ENSMUSG00000063253	1.25352	4.85561	89.4651	3.12101e-21	1.81876e-19	ENSMUSG00000101860	-4.1354	-0.0974343	105.673	8.6946e-25	5.13168e-23	ENSMUSG00000094441	-1.20905	3.80995	147.624	5.73261e-34	3.42898e-32	ENSMUSG00000031376	3.76327	-0.619644	130.065	3.96639e-30	2.40315e-28	ENSMUSG00000007107	-4.58565
ENSMUSG00000036073	-0.67065	4.86474	134.869	3.52682e-31	2.21391e-29	ENSMUSG00000029642	0.62548	5.02186	125.983	3.10094e-29	1.97877e-27	ENSMUSG00000039852	-0.398738	7.45791	156.825	5.59029e-36	3.58543e-34	ENSMUSG00000028018	-2.51356	3.05041	153.434	3.07987e-35	2.00731e-33	ENSMUSG00000023039	-3.56266	1.56241	89.1613	3.63906e-21	2.11159e-19	ENSMUSG00000021091	-2.53377	4.72094	105.636	8.86215e-25	5.20821e-23	ENSMUSG00000034449	0.964706	6.9811	147.306	6.72832e-34	4.00738e-32	ENSMUSG00000079036	0.759645	3.94058	129.972	4.15536e-30	2.50689e-28	ENSMUSG00000023153	1.9289
ENSMUSG00000024174	0.920254	3.18114	134.422	4.41643e-31	2.76055e-29	ENSMUSG00000082815	2.60582	-0.103859	125.711	3.55661e-29	2.25988e-27	ENSMUSG00000031201	0.608857	5.4579	156.706	5.93453e-36	3.79002e-34	ENSMUSG00000038451	1.20798	2.54469	153.023	3.78725e-35	2.45785e-33	ENSMUSG00000041313	-1.41122	4.34964	89.1335	3.69048e-21	2.13231e-19	ENSMUSG00000030595	0.843146	4.25762	105.523	9.38095e-25	5.48965e-23	ENSMUSG00000090843	5.32113	-1.33036	147.197	7.10833e-34	4.21569e-32	ENSMUSG00000000149	-1.10731	6.8394	129.789	4.558e-30	2.7381e-28	ENSMUSG00000028750	-3.92955
ENSMUSG00000005968	1.30007	2.82553	134.118	5.14955e-31	3.20516e-29	ENSMUSG00000048355	0.664988	4.9271	125.135	4.75492e-29	3.00849e-27	ENSMUSG00000024227	-3.19503	1.39813	156.66	6.07395e-36	3.86262e-34	ENSMUSG00000080717	-1.01159	3.60122	152.604	4.67583e-35	3.02166e-33	ENSMUSG00000094686	-1.58864	4.6991	89.0262	3.89616e-21	2.24161e-19	ENSMUSG00000029049	-1.53013	1.33864	105.284	1.05806e-24	6.16542e-23	ENSMUSG00000021973	-0.671832	6.50883	147.143	7.30305e-34	4.31282e-32	ENSMUSG00000029330	2.0019	5.46392	129.547	5.14712e-30	3.07889e-28	ENSMUSG00000052229	-3.30573
ENSMUSG00000041375	0.528613	5.88844	134.051	5.32415e-31	3.29985e-29	ENSMUSG00000027133	0.556764	4.77453	124.945	5.23306e-29	3.29705e-27	ENSMUSG00000053128	-3.41115	1.48359	156.141	7.88672e-36	4.99426e-34	ENSMUSG00000027630	-0.536828	6.30687	152.472	4.99584e-35	3.21483e-33	ENSMUSG00000027048	6.10544	0.691051	88.6278	4.76545e-21	2.73018e-19	ENSMUSG00000020219	1.33582	5.30142	105.07	1.17917e-24	6.84217e-23	ENSMUSG00000039007	-1.23721	5.1693	146.899	8.25561e-34	4.85478e-32	ENSMUSG00000019194	-1.48871	4.21011	128.976	6.86353e-30	4.08829e-28	ENSMUSG00000036278	1.15817
ENSMUSG00000022323	0.939581	5.64535	134.035	5.36674e-31	3.31227e-29	ENSMUSG00000074182	0.8232	4.71708	124.658	6.04705e-29	3.79389e-27	ENSMUSG00000020630	0.859015	3.84112	155.881	8.9895e-36	5.66867e-34	ENSMUSG00000011034	-3.75509	0.756427	152.452	5.04736e-35	3.23434e-33	ENSMUSG00000031672	-0.979769	9.20677	88.4364	5.24957e-21	2.9949e-19	ENSMUSG00000054612	-1.30329	2.35004	104.273	1.76263e-24	1.01847e-22	ENSMUSG00000028553	-8.91573	1.49415	146.697	9.14051e-34	5.35258e-32	ENSMUSG00000017667	-1.10018	3.1249	127.767	1.26237e-29	7.48775e-28	ENSMUSG00000002329	-1.01011
ENSMUSG00000053398	-0.833969	5.11182	133.468	7.14097e-31	4.38886e-29	ENSMUSG00000035933	-0.501775	5.77855	124.554	6.37226e-29	3.98119e-27	ENSMUSG00000028794	-2.38152	0.312138	155.615	1.02764e-35	6.45308e-34	ENSMUSG00000078932	3.38827	0.329385	151.832	6.89494e-35	4.39978e-33	ENSMUSG00000053774	0.743479	5.62746	88.1053	6.20621e-21	3.52585e-19	ENSMUSG00000064264	1.5373	3.21705	104.124	1.89998e-24	1.09324e-22	ENSMUSG00000022055	4.51148	-0.505423	146.301	1.1158e-33	6.50666e-32	ENSMUSG00000026829	-4.05211	0.0074406	127.35	1.55732e-29	9.19859e-28	ENSMUSG00000047787	-1.68728
ENSMUSG00000024521	1.80532	2.68303	132.937	9.33106e-31	5.711e-29	ENSMUSG00000038690	0.6299	6.97833	124.526	6.46147e-29	4.02011e-27	ENSMUSG00000028256	-0.806666	4.15795	155.316	1.1946e-35	7.4702e-34	ENSMUSG00000070695	-0.973158	5.88334	151.459	8.31767e-35	5.28553e-33	ENSMUSG00000024535	-1.09174	2.79519	87.8001	7.24151e-21	4.09688e-19	ENSMUSG00000017167	-1.115	2.33298	104.063	1.95959e-24	1.12284e-22	ENSMUSG00000032028	-6.16284	1.57448	146.199	1.17429e-33	6.81921e-32	ENSMUSG00000026443	-2.34394	2.98486	126.883	1.97087e-29	1.15928e-27	ENSMUSG00000005628	-2.61459
ENSMUSG00000024955	0.444977	6.21214	132.629	1.08996e-30	6.64335e-29	ENSMUSG00000027374	0.408959	5.83125	124.498	6.55372e-29	4.06059e-27	ENSMUSG00000010025	-0.560105	5.81202	154.618	1.69723e-35	1.05693e-33	ENSMUSG00000031683	0.721683	5.53001	151.14	9.76659e-35	6.18051e-33	ENSMUSG00000075289	0.904651	5.90845	87.2808	9.41554e-21	5.30474e-19	ENSMUSG00000019817	-2.45514	4.73047	103.988	2.03526e-24	1.16137e-22	ENSMUSG00000040462	0.768692	5.7477	145.557	1.62229e-33	9.38169e-32	ENSMUSG00000057176	1.34292	2.84307	126.715	2.14498e-29	1.25646e-27	ENSMUSG00000005225	-1.09149
ENSMUSG00000021690	-0.624738	6.15873	132.104	1.41986e-30	8.6183e-29	ENSMUSG00000024114	2.93363	1.05176	124.061	8.17051e-29	5.04141e-27	ENSMUSG00000023367	1.12031	3.93047	154.581	1.72912e-35	1.07234e-33	ENSMUSG00000029464	0.637414	4.28936	150.977	1.06014e-34	6.68106e-33	ENSMUSG00000046318	-1.39008	2.64354	87.1658	9.97933e-21	5.59915e-19	ENSMUSG00000040219	-2.28406	4.37003	103.84	2.19339e-24	1.24643e-22	ENSMUSG00000051504	-5.26745	0.718201	145.143	1.99815e-33	1.15075e-31	ENSMUSG00000028359	5.69433	4.11197	126.015	3.05116e-29	1.77988e-27	ENSMUSG00000046709	2.51439
ENSMUSG00000037437	2.64372	0.187761	131.827	1.6327e-30	9.86942e-29	ENSMUSG00000029030	-0.470995	6.84357	123.383	1.1495e-28	7.0635e-27	ENSMUSG00000033777	-2.7403	0.0714542	153.978	2.34211e-35	1.44652e-33	ENSMUSG00000015305	-0.735668	6.81722	150.373	1.43707e-34	9.01925e-33	ENSMUSG00000033417	0.574601	5.49827	86.8347	1.17983e-20	6.57622e-19	ENSMUSG00000029392	0.941649	7.47843	103.642	2.42344e-24	1.37149e-22	ENSMUSG00000021213	3.20267	2.33584	144.976	2.17388e-33	1.24681e-31	ENSMUSG00000047033	1.76341	0.583968	125.904	3.22686e-29	1.87463e-27	ENSMUSG00000026255	0.912896
ENSMUSG00000046711	0.687543	4.71609	131.689	1.75014e-30	1.0536e-28	ENSMUSG00000014782	-1.9464	2.32376	123.295	1.20158e-28	7.35325e-27	ENSMUSG00000015966	-2.84769	0.0271567	153.94	2.38689e-35	1.46813e-33	ENSMUSG00000054702	-2.17293	1.07522	150.277	1.50808e-34	9.42613e-33	ENSMUSG00000046182	-2.39439	4.86013	86.8314	1.18176e-20	6.57622e-19	ENSMUSG00000063882	0.700475	9.62351	103.543	2.54779e-24	1.43595e-22	ENSMUSG00000024891	1.03303	3.82451	144.822	2.34847e-33	1.34142e-31	ENSMUSG00000050840	1.79563	3.04456	125.669	3.63263e-29	2.10172e-27	ENSMUSG00000035443	-1.13937
ENSMUSG00000039835	-0.515954	5.42729	131.504	1.92111e-30	1.1518e-28	ENSMUSG00000030161	0.454578	9.13907	123.245	1.23228e-28	7.51037e-27	ENSMUSG00000036231	3.71676	-0.330032	153.816	2.54121e-35	1.55667e-33	ENSMUSG00000035754	-0.473846	5.75422	150.108	1.64223e-34	1.02227e-32	ENSMUSG00000043795	1.29376	2.84092	86.7914	1.20596e-20	6.68345e-19	ENSMUSG00000040605	-1.79251	4.80438	103.19	3.04437e-24	1.70882e-22	ENSMUSG00000020230	1.04422	3.97705	144.808	2.36574e-33	1.34577e-31	ENSMUSG00000035629	-0.805742	6.01419	125.13	4.76632e-29	2.74638e-27	ENSMUSG00000018581	-4.09057
ENSMUSG00000024580	-0.545707	4.6415	131.446	1.97752e-30	1.1808e-28	ENSMUSG00000063457	0.651603	7.85089	123.147	1.29468e-28	7.85859e-27	ENSMUSG00000033170	-1.45099	3.66424	153.737	2.64368e-35	1.61286e-33	ENSMUSG00000078931	-2.89232	-0.503928	149.559	2.16501e-34	1.34222e-32	ENSMUSG00000035226	-2.1071	1.87663	86.4665	1.42125e-20	7.8446e-19	ENSMUSG00000021057	2.44581	2.88546	102.892	3.54002e-24	1.97896e-22	ENSMUSG00000025172	2.82869	-1.14771	144.701	2.49651e-33	1.41438e-31	ENSMUSG00000039899	-2.028	6.51687	124.918	5.30312e-29	3.04326e-27	ENSMUSG00000030283	-1.23605
ENSMUSG00000066537	-1.8591	0.384946	131.2	2.2387e-30	1.33134e-28	ENSMUSG00000021520	0.541969	6.23958	122.98	1.40858e-28	8.51537e-27	ENSMUSG00000043091	-3.55486	4.22797	153.625	2.79697e-35	1.69677e-33	ENSMUSG00000062762	0.48115	6.97619	149.248	2.53085e-34	1.56267e-32	ENSMUSG00000053025	-3.12598	-0.783555	86.3818	1.48341e-20	8.15453e-19	ENSMUSG00000003809	0.771318	6.22477	102.724	3.85322e-24	2.14532e-22	ENSMUSG00000061171	2.07979	0.294587	143.623	4.29498e-33	2.42345e-31	ENSMUSG00000027078	-3.83733	6.59921	124.763	5.73544e-29	3.27802e-27	ENSMUSG00000060131	-2.30763
ENSMUSG00000075376	-0.82849	6.62206	131.112	2.34071e-30	1.3864e-28	ENSMUSG00000076432	0.511349	7.70402	122.736	1.59294e-28	9.59105e-27	ENSMUSG00000064354	2.24219	4.03807	153.62	2.80384e-35	1.69677e-33	ENSMUSG00000038567	2.8245	-1.20562	148.753	3.24697e-34	1.99675e-32	ENSMUSG00000062382	-5.28588	0.761119	86.0859	1.72289e-20	9.43281e-19	ENSMUSG00000018362	1.33962	6.71866	102.66	3.97892e-24	2.20638e-22	ENSMUSG00000028396	-2.24111	6.2311	143.145	5.46406e-33	3.07067e-31	ENSMUSG00000022054	5.16621	2.22871	124.731	5.82957e-29	3.31839e-27	ENSMUSG00000071669	-1.34984
ENSMUSG00000054199	-0.466918	5.81575	130.909	2.59223e-30	1.52921e-28	ENSMUSG00000087687	0.615342	4.11938	122.629	1.68125e-28	1.00817e-26	ENSMUSG00000018449	0.790026	3.97976	152.141	5.90237e-35	3.55754e-33	ENSMUSG00000031904	0.718293	5.26923	148.258	4.16579e-34	2.55151e-32	ENSMUSG00000078157	3.20964	-0.0470195	85.9075	1.88554e-20	1.02819e-18	ENSMUSG00000026589	-1.46321	2.34846	102.636	4.02835e-24	2.22481e-22	ENSMUSG00000041216	3.64909	2.73061	142.948	6.03365e-33	3.37715e-31	ENSMUSG00000025092	1.19812	5.5666	124.667	6.01851e-29	3.41218e-27	ENSMUSG00000003199	0.988649
ENSMUSG00000057092	3.7644	-0.087127	130.43	3.29923e-30	1.9385e-28	ENSMUSG00000006589	0.8988	4.42488	122.621	1.68794e-28	1.00817e-26	ENSMUSG00000022525	0.890409	4.64598	151.611	7.70709e-35	4.62672e-33	ENSMUSG00000029598	-0.494279	5.87946	148.151	4.39603e-34	2.68175e-32	ENSMUSG00000029156	0.740242	7.87515	85.8668	1.92474e-20	1.04537e-18	ENSMUSG00000006191	0.77383	4.64605	102.616	4.06891e-24	2.23823e-22	ENSMUSG00000040372	2.45336	0.661581	142.642	7.03757e-33	3.9233e-31	ENSMUSG00000066456	1.7763	3.92791	124.452	6.70957e-29	3.78876e-27	ENSMUSG00000032217	-0.950747
ENSMUSG00000089682	0.436198	7.54818	129.034	6.66759e-30	3.902e-28	ENSMUSG00000021774	0.382047	6.25047	122.262	2.02288e-28	1.20341e-26	ENSMUSG00000024899	-1.30583	3.12893	151.348	8.79856e-35	5.2609e-33	ENSMUSG00000021364	0.737378	5.09778	146.395	1.06387e-33	6.46416e-32	ENSMUSG00000020169	-2.67401	1.7471	85.7091	2.08456e-20	1.12766e-18	ENSMUSG00000049940	0.778877	5.97438	102.518	4.27478e-24	2.3421e-22	ENSMUSG00000056091	1.38636	6.38603	142.383	8.02034e-33	4.45337e-31	ENSMUSG00000024424	1.22361	3.12305	124.306	7.21929e-29	4.06035e-27	ENSMUSG00000025359	2.25696
ENSMUSG00000049439	-0.864981	3.11294	128.941	6.98789e-30	4.07322e-28	ENSMUSG00000035674	0.624242	6.06972	121.476	3.00688e-28	1.7817e-26	ENSMUSG00000040552	2.01533	1.15103	150.867	1.12061e-34	6.67388e-33	ENSMUSG00000108348	-0.541187	7.25992	145.346	1.80409e-33	1.09183e-31	ENSMUSG00000030556	0.822878	3.48902	85.1679	2.74081e-20	1.47677e-18	ENSMUSG00000028037	-3.9187	1.22956	102.474	4.3711e-24	2.38537e-22	ENSMUSG00000058407	-0.766426	5.43316	142.159	8.97577e-33	4.9641e-31	ENSMUSG00000071537	1.975	0.794342	124.265	7.37226e-29	4.12993e-27	ENSMUSG00000042831	1.19456
ENSMUSG00000093674	0.484712	7.69836	128.492	8.76112e-30	5.08664e-28	ENSMUSG00000061479	-0.602212	5.18563	121.392	3.13596e-28	1.84946e-26	ENSMUSG00000032186	-0.775862	9.15048	150.719	1.20699e-34	7.1599e-33	ENSMUSG00000026616	4.83158	2.85615	145.329	1.82009e-33	1.09716e-31	ENSMUSG00000043424	-2.71227	3.32397	84.8415	3.23275e-20	1.73495e-18	ENSMUSG00000052565	3.01431	1.64689	102.138	5.17867e-24	2.81491e-22	ENSMUSG00000027227	-1.31965	6.92149	142.114	9.18089e-33	5.05747e-31	ENSMUSG00000040479	0.786899	6.82918	124.219	7.54256e-29	4.20863e-27	ENSMUSG00000019301	-2.65443
ENSMUSG00000035372	-0.637943	4.14993	128.32	9.55186e-30	5.52391e-28	ENSMUSG00000028907	0.637278	4.48641	121.386	3.14601e-28	1.84946e-26	ENSMUSG00000020072	1.32794	1.35216	150.422	1.40201e-34	8.28399e-33	ENSMUSG00000039457	1.93002	3.2147	144.825	2.34577e-33	1.40848e-31	ENSMUSG00000042271	0.790191	3.76899	84.7949	3.30984e-20	1.76933e-18	ENSMUSG00000029314	0.943137	4.49396	101.959	5.66687e-24	3.06055e-22	ENSMUSG00000026196	3.47867	3.57975	141.965	9.89566e-33	5.42976e-31	ENSMUSG00000024901	1.23733	3.30008	123.772	9.45098e-29	5.25274e-27	ENSMUSG00000016758	-1.70325
ENSMUSG00000069206	0.836019	3.69222	127.613	1.36418e-29	7.8582e-28	ENSMUSG00000027597	0.680413	4.21545	121.348	3.20697e-28	1.8779e-26	ENSMUSG00000034105	0.765465	3.89789	150.234	1.54129e-34	9.07122e-33	ENSMUSG00000051037	2.15768	2.54424	144.76	2.424e-33	1.44974e-31	ENSMUSG00000054612	-1.73929	2.53741	84.6877	3.49412e-20	1.86052e-18	ENSMUSG00000020169	-2.37477	1.68008	101.957	5.6751e-24	3.06055e-22	ENSMUSG00000036502	1.41776	1.48511	141.577	1.20318e-32	6.57597e-31	ENSMUSG00000072704	-1.02649	6.6312	123.515	1.07555e-28	5.95431e-27	ENSMUSG00000061518	0.864252
ENSMUSG00000027288	-0.396588	8.55601	127.328	1.57478e-29	9.03589e-28	ENSMUSG00000029486	0.799751	4.41885	121.285	3.30985e-28	1.93058e-26	ENSMUSG00000028445	-0.824536	5.52506	150.191	1.57462e-34	9.23119e-33	ENSMUSG00000027430	0.427231	5.25183	144.701	2.49646e-33	1.48725e-31	ENSMUSG00000021646	0.574944	6.28216	84.6786	3.51036e-20	1.86186e-18	ENSMUSG00000037617	-1.7876	1.23086	101.91	5.81065e-24	3.12141e-22	ENSMUSG00000038623	1.38964	4.49818	140.983	1.62313e-32	8.83656e-31	ENSMUSG00000026344	-2.37219	1.73944	123.476	1.09682e-28	6.04834e-27	ENSMUSG00000015222	1.2979
ENSMUSG00000001166	-3.61761	-1.00448	127.278	1.61451e-29	9.22783e-28	ENSMUSG00000032018	0.616768	6.37145	120.775	4.28014e-28	2.48681e-26	ENSMUSG00000056938	0.501852	5.34566	150.042	1.69755e-34	9.91315e-33	ENSMUSG00000059552	0.580623	4.43348	144.386	2.9255e-33	1.73606e-31	ENSMUSG00000064368	2.19634	9.89459	84.6495	3.5624e-20	1.88211e-18	ENSMUSG00000002565	-2.98342	-0.148552	101.871	5.92651e-24	3.17126e-22	ENSMUSG00000032478	1.01911	3.48844	140.832	1.75071e-32	9.49404e-31	ENSMUSG00000006378	-2.99462	0.1904	123.216	1.25088e-28	6.87106e-27	ENSMUSG00000028614	0.812492
ENSMUSG00000072941	1.15412	3.04741	127.05	1.8118e-29	1.03153e-27	ENSMUSG00000030754	0.410639	6.53785	120.226	5.64434e-28	3.26672e-26	ENSMUSG00000027281	0.703554	3.95786	149.999	1.73455e-34	1.009e-32	ENSMUSG00000048534	1.85666	1.29499	144.35	2.9783e-33	1.76055e-31	ENSMUSG00000064179	1.88741	4.94166	84.3125	4.22436e-20	2.22319e-18	ENSMUSG00000026519	-0.881149	5.01559	101.663	6.5827e-24	3.50873e-22	ENSMUSG00000021094	1.53032	5.42985	140.778	1.79915e-32	9.7189e-31	ENSMUSG00000060639	-6.58684	0.314004	123.155	1.28952e-28	7.05588e-27	ENSMUSG00000038775	1.09892
ENSMUSG00000022519	-1.90002	2.72411	126.967	1.8885e-29	1.07105e-27	ENSMUSG00000027714	0.539607	4.49551	119.722	7.27652e-28	4.1951e-26	ENSMUSG00000074652	-1.37133	3.63187	149.567	2.15544e-34	1.24899e-32	ENSMUSG00000024885	1.50789	2.55144	144.028	3.50361e-33	2.06307e-31	ENSMUSG00000024730	2.67477	1.4618	84.2	4.47173e-20	2.34429e-18	ENSMUSG00000046182	-2.38174	4.90838	101.626	6.70616e-24	3.56074e-22	ENSMUSG00000056306	3.62811	0.263621	140.669	1.90084e-32	1.02286e-30	ENSMUSG00000073643	-0.869867	4.87844	122.47	1.82148e-28	9.92811e-27	ENSMUSG00000063730	-1.47558
ENSMUSG00000028689	2.12224	3.11995	126.695	2.16619e-29	1.22381e-27	ENSMUSG00000030795	0.566572	8.89042	119.583	7.80702e-28	4.48363e-26	ENSMUSG00000095315	-2.93466	2.19783	149.505	2.22365e-34	1.28356e-32	ENSMUSG00000030048	-6.30015	0.728509	143.809	3.91218e-33	2.29479e-31	ENSMUSG00000033233	0.986732	3.25903	84.0481	4.82882e-20	2.52176e-18	ENSMUSG00000072235	-0.843402	5.59454	100.977	9.3036e-24	4.92089e-22	ENSMUSG00000035649	0.886599	5.40294	140.557	2.01126e-32	1.07811e-30	ENSMUSG00000050447	-3.63107	1.26657	122.456	1.83425e-28	9.95927e-27	ENSMUSG00000070690	-4.51568
ENSMUSG00000021290	0.493021	5.77846	126.642	2.22479e-29	1.25211e-27	ENSMUSG00000073481	-0.76596	4.98622	119.22	9.37229e-28	5.36196e-26	ENSMUSG00000029600	-1.08179	3.82389	148.931	2.96838e-34	1.70687e-32	ENSMUSG00000025588	2.096	1.09861	143.384	4.84513e-33	2.83115e-31	ENSMUSG00000075000	-1.97747	1.89402	83.8901	5.23047e-20	2.72105e-18	ENSMUSG00000006281	-1.32709	4.80358	100.958	9.39426e-24	4.9498e-22	ENSMUSG00000021559	-1.68295	5.50762	140.351	2.23074e-32	1.19118e-30	ENSMUSG00000036502	1.60245	1.71294	122.41	1.87716e-28	1.01532e-26	ENSMUSG00000040263	0.839358
ENSMUSG00000027714	0.579419	4.47268	126.348	2.58041e-29	1.44671e-27	ENSMUSG00000015937	-0.452521	6.19228	118.704	1.21588e-27	6.92957e-26	ENSMUSG00000037321	1.08477	2.08522	148.911	2.99905e-34	1.71793e-32	ENSMUSG00000037022	-0.698896	4.80023	143.169	5.3981e-33	3.14223e-31	ENSMUSG00000028414	0.785172	6.17422	83.6235	5.98573e-20	3.10207e-18	ENSMUSG00000036412	1.95817	1.67653	100.738	1.05011e-23	5.51186e-22	ENSMUSG00000090266	-0.962437	4.1536	140.282	2.31022e-32	1.22891e-30	ENSMUSG00000029061	-1.73051	3.6463	122.233	2.05287e-28	1.10612e-26	ENSMUSG00000031886	-2.18475
ENSMUSG00000050424	2.76472	-0.0448369	125.461	4.03342e-29	2.25273e-27	ENSMUSG00000015806	0.876149	7.38138	118.54	1.32043e-27	7.49685e-26	ENSMUSG00000028743	0.686385	3.97648	148.577	3.5476e-34	2.02443e-32	ENSMUSG00000026171	0.420248	5.43323	143.06	5.70423e-33	3.3078e-31	ENSMUSG00000024654	-1.13838	5.01857	83.5001	6.37132e-20	3.28934e-18	ENSMUSG00000018417	1.05804	5.31751	100.469	1.20286e-23	6.28962e-22	ENSMUSG00000044349	5.88098	4.29084	139.986	2.68022e-32	1.42031e-30	ENSMUSG00000029592	0.947667	4.44814	122.122	2.17102e-28	1.16533e-26	ENSMUSG00000024174	1.32515
ENSMUSG00000037239	0.847137	5.97569	125.443	4.07193e-29	2.26563e-27	ENSMUSG00000005882	0.409682	5.83906	118.062	1.68067e-27	9.50598e-26	ENSMUSG00000041966	0.650508	4.8791	148.41	3.85922e-34	2.19391e-32	ENSMUSG00000043300	-0.551771	5.47162	142.963	5.98922e-33	3.45991e-31	ENSMUSG00000026011	2.20796	2.94534	83.2883	7.09174e-20	3.64741e-18	ENSMUSG00000033715	1.33137	4.58822	100.335	1.28698e-23	6.70398e-22	ENSMUSG00000045776	-2.27697	9.09155	139.803	2.94025e-32	1.55221e-30	ENSMUSG00000072066	-2.87616	-0.0727292	121.852	2.48664e-28	1.32969e-26	ENSMUSG00000032743	-0.923702
ENSMUSG00000051054	1.76738	0.620333	125.122	4.78645e-29	2.65314e-27	ENSMUSG00000061787	0.684969	7.11771	117.981	1.75079e-27	9.86521e-26	ENSMUSG00000027630	-0.480254	6.24404	148.387	3.9047e-34	2.21139e-32	ENSMUSG00000023031	1.54844	1.00072	142.727	6.74528e-33	3.88197e-31	ENSMUSG00000020646	-1.22886	3.97395	83.0918	7.83294e-20	4.01342e-18	ENSMUSG00000029762	-2.07115	3.00123	100.181	1.39112e-23	7.21914e-22	ENSMUSG00000022191	-0.546922	5.79864	139.338	3.71535e-32	1.95399e-30	ENSMUSG00000067878	1.50544	1.1363	121.752	2.61516e-28	1.39314e-26	ENSMUSG00000035504	-2.82588
ENSMUSG00000071748	2.91575	0.262187	125.059	4.94056e-29	2.72827e-27	ENSMUSG00000050043	-0.427158	6.71009	117.737	1.97986e-27	1.1114e-25	ENSMUSG00000015879	1.01766	4.74265	147.814	5.21009e-34	2.93959e-32	ENSMUSG00000051557	0.986568	4.30817	141.969	9.87617e-33	5.66246e-31	ENSMUSG00000001663	-1.38131	3.5251	83.0381	8.0489e-20	4.10857e-18	ENSMUSG00000028116	0.699743	10.1903	100.055	1.48201e-23	7.66189e-22	ENSMUSG00000054843	0.969228	5.81169	139.251	3.88188e-32	2.0339e-30	ENSMUSG00000054894	0.829262	4.79808	121.697	2.68958e-28	1.4274e-26	ENSMUSG00000066366	4.83494
ENSMUSG00000024810	0.91532	5.86949	124.53	6.44947e-29	3.54818e-27	ENSMUSG00000041879	-0.469872	7.70247	117.692	2.02561e-27	1.13283e-25	ENSMUSG00000039883	2.59725	-0.677435	147.777	5.30785e-34	2.98353e-32	ENSMUSG00000047996	-1.40341	2.86293	140.065	2.57693e-32	1.47194e-30	ENSMUSG00000051113	2.27098	1.2167	82.7025	9.538e-20	4.85045e-18	ENSMUSG00000031519	1.17982	4.70543	100.034	1.49801e-23	7.71561e-22	ENSMUSG00000021591	1.92363	5.86419	138.934	4.55275e-32	2.37647e-30	ENSMUSG00000020303	2.05673	5.13374	121.352	3.19926e-28	1.69154e-26	ENSMUSG00000022751	-0.720512
ENSMUSG00000006010	0.492787	6.0383	124.17	7.73261e-29	4.23822e-27	ENSMUSG00000066537	-1.91766	0.380041	117.669	2.04839e-27	1.14129e-25	ENSMUSG00000023806	1.46647	3.69354	147.719	5.46364e-34	3.05964e-32	ENSMUSG00000028100	-1.67966	1.35108	139.847	2.87566e-32	1.63644e-30	ENSMUSG00000048371	0.958859	5.66279	82.6752	9.67064e-20	4.89955e-18	ENSMUSG00000041782	-5.11403	2.27482	98.8616	2.70785e-23	1.38949e-21	ENSMUSG00000030876	-0.753669	5.91451	138.594	5.40481e-32	2.81071e-30	ENSMUSG00000027227	-1.27513	6.96309	120.794	4.24015e-28	2.23352e-26	ENSMUSG00000094806	5.21075
ENSMUSG00000078490	1.01908	4.42888	124.129	7.8957e-29	4.30896e-27	ENSMUSG00000032097	0.472277	8.37739	117.379	2.37103e-27	1.31614e-25	ENSMUSG00000031214	-0.522523	5.93453	147.387	6.45804e-34	3.60306e-32	ENSMUSG00000025269	1.04779	3.33928	139.809	2.93091e-32	1.66168e-30	ENSMUSG00000028292	-0.690994	3.96218	82.5547	1.02786e-19	5.1882e-18	ENSMUSG00000038859	-1.12237	3.52621	98.8391	2.73877e-23	1.40013e-21	ENSMUSG00000044951	-3.96818	7.72664	138.326	6.18342e-32	3.20366e-30	ENSMUSG00000031575	0.590245	5.4576	120.356	5.28647e-28	2.77431e-26	ENSMUSG00000028327	-3.84837
ENSMUSG00000030869	0.463204	6.62334	124.122	7.92035e-29	4.30896e-27	ENSMUSG00000033208	1.39326	8.57409	116.534	3.63185e-27	2.00855e-25	ENSMUSG00000028327	2.64078	-0.983513	147.168	7.20989e-34	4.00763e-32	ENSMUSG00000029310	-0.489998	5.14174	138.592	5.40964e-32	3.05564e-30	ENSMUSG00000000305	1.83669	3.16485	81.9997	1.36105e-19	6.84455e-18	ENSMUSG00000031906	-2.11432	3.70315	98.7799	2.8219e-23	1.43729e-21	ENSMUSG00000028019	-1.82373	2.45562	138.066	7.04778e-32	3.63796e-30	ENSMUSG00000020309	1.12879	4.63279	119.968	6.42998e-28	3.36193e-26	ENSMUSG00000043518	1.47808
ENSMUSG00000039108	0.392587	6.81206	123.96	8.59731e-29	4.65999e-27	ENSMUSG00000029208	-0.890234	5.76493	116.322	4.04113e-27	2.22665e-25	ENSMUSG00000000948	1.0581	5.31483	146.927	8.14034e-34	4.50813e-32	ENSMUSG00000074264	-1.14372	4.92235	138.069	7.03872e-32	3.96116e-30	ENSMUSG00000033684	0.893842	5.45521	81.9645	1.3855e-19	6.94183e-18	ENSMUSG00000040387	2.30004	1.55459	98.7512	2.86298e-23	1.45283e-21	ENSMUSG00000021403	-4.30549	-0.846101	137.77	8.18135e-32	4.20751e-30	ENSMUSG00000060445	2.58005	2.24801	119.825	6.90871e-28	3.5989e-26	ENSMUSG00000046562	-0.788175
ENSMUSG00000022671	0.962321	4.03245	123.22	1.24792e-28	6.7392e-27	ENSMUSG00000033488	-1.40531	2.34653	115.898	5.00338e-27	2.74671e-25	ENSMUSG00000036672	-0.605195	4.10745	145.578	1.60551e-33	8.85861e-32	ENSMUSG00000021671	-0.456695	5.47858	137.614	8.84999e-32	4.96218e-30	ENSMUSG00000056978	3.67904	3.41277	81.5552	1.70433e-19	8.50785e-18	ENSMUSG00000030972	-2.29177	1.65	98.6728	2.97867e-23	1.50598e-21	ENSMUSG00000028549	-1.41745	2.52804	137.51	9.32748e-32	4.7793e-30	ENSMUSG00000045733	-5.03196	0.119753	119.794	7.0179e-28	3.64234e-26	ENSMUSG00000022636	-2.00546
ENSMUSG00000029452	1.45555	1.82704	122.731	1.59678e-28	8.59162e-27	ENSMUSG00000068417	3.15676	-0.444377	115.786	5.29454e-27	2.8959e-25	ENSMUSG00000031628	0.728326	4.45799	145.324	1.82421e-33	1.00285e-31	ENSMUSG00000051502	0.959944	3.29353	137.339	1.01659e-31	5.6791e-30	ENSMUSG00000031666	0.728762	6.0981	81.4928	1.759e-19	8.74859e-18	ENSMUSG00000069255	0.821346	4.56778	98.4783	3.2861e-23	1.65533e-21	ENSMUSG00000036377	-3.60663	1.46493	136.864	1.29106e-31	6.59101e-30	ENSMUSG00000027309	0.737326	6.88622	119.747	7.1864e-28	3.71613e-26	ENSMUSG00000031725	0.975084
ENSMUSG00000052616	1.82123	1.48202	122.587	1.71737e-28	9.20673e-27	ENSMUSG00000063787	0.631647	4.8804	115.544	5.98097e-27	3.25941e-25	ENSMUSG00000030793	-1.75402	0.55412	143.453	4.67981e-33	2.56331e-31	ENSMUSG00000027330	0.791877	4.30212	136.665	1.42718e-31	7.94378e-30	ENSMUSG00000028268	1.73893	4.62073	81.3285	1.91149e-19	9.47235e-18	ENSMUSG00000032249	0.514185	7.2592	98.4656	3.30725e-23	1.6599e-21	ENSMUSG00000030862	-3.50545	4.6635	136.207	1.79782e-31	9.14462e-30	ENSMUSG00000025172	2.87697	-0.953409	119.187	9.53168e-28	4.9109e-26	ENSMUSG00000027896	1.43922
ENSMUSG00000062963	0.528095	5.64054	122.558	1.74227e-28	9.30625e-27	ENSMUSG00000075296	-3.05193	2.25795	115.43	6.33542e-27	3.44002e-25	ENSMUSG00000033715	-2.75284	1.40161	143.416	4.76727e-33	2.60172e-31	ENSMUSG00000033777	-2.72816	0.288741	136.285	1.72871e-31	9.58714e-30	ENSMUSG00000029718	-0.811097	5.70274	81.048	2.20302e-19	1.08773e-17	ENSMUSG00000006342	-1.97089	1.54337	98.338	3.52728e-23	1.76389e-21	ENSMUSG00000053166	3.54924	2.51251	135.983	2.01266e-31	1.02002e-29	ENSMUSG00000029591	-1.74339	4.05325	119.095	9.98473e-28	5.12562e-26	ENSMUSG00000062012	1.56118
ENSMUSG00000044176	-3.44967	1.26683	122.016	2.29027e-28	1.2189e-26	ENSMUSG00000020010	4.12165	-1.15705	115.222	7.03541e-27	3.80626e-25	ENSMUSG00000038312	-0.623787	4.26379	143.187	5.35065e-33	2.90951e-31	ENSMUSG00000097638	1.79667	0.211696	136.227	1.77943e-31	9.83263e-30	ENSMUSG00000024302	0.546295	6.47461	80.9545	2.30972e-19	1.13628e-17	ENSMUSG00000037826	1.01346	7.63752	98.2897	3.61439e-23	1.80091e-21	ENSMUSG00000023249	-1.58467	5.2669	135.971	2.02498e-31	1.02254e-29	ENSMUSG00000021340	-2.8038	2.10584	118.395	1.42113e-27	7.26887e-26	ENSMUSG00000074182	1.1647
ENSMUSG00000024213	0.42068	7.25767	121.618	2.79903e-28	1.4843e-26	ENSMUSG00000039942	1.95075	1.23733	115.191	7.14655e-27	3.85243e-25	ENSMUSG00000035394	2.24459	0.315602	143.122	5.5267e-33	2.99439e-31	ENSMUSG00000034353	-0.565807	5.18839	135.789	2.2189e-31	1.22167e-29	ENSMUSG00000021557	-0.854809	6.98744	80.7544	2.55586e-19	1.25283e-17	ENSMUSG00000067276	-2.799	1.98308	98.2253	3.73389e-23	1.85373e-21	ENSMUSG00000047394	1.86007	0.656142	135.926	2.07079e-31	1.0419e-29	ENSMUSG00000087651	-2.92424	0.381587	118.257	1.52341e-27	7.76388e-26	ENSMUSG00000038991	0.826409
ENSMUSG00000001123	-1.77033	1.96549	121.46	3.0304e-28	1.60121e-26	ENSMUSG00000068329	0.647936	4.82867	115.126	7.38472e-27	3.9665e-25	ENSMUSG00000052144	-0.631751	6.15702	142.627	7.09353e-33	3.82948e-31	ENSMUSG00000079293	2.50943	0.223766	135.356	2.76023e-31	1.51425e-29	ENSMUSG00000056427	-1.2257	4.89659	80.7252	2.59397e-19	1.26694e-17	ENSMUSG00000027896	-3.28696	-0.0713953	98.1996	3.78266e-23	1.87119e-21	ENSMUSG00000025232	-0.725463	5.826	135.651	2.37931e-31	1.19282e-29	ENSMUSG00000038801	-3.45308	2.77291	118.218	1.5534e-27	7.88826e-26	ENSMUSG00000040978	-1.36923
ENSMUSG00000027131	0.498341	6.14379	121.071	3.68691e-28	1.94111e-26	ENSMUSG00000058267	0.710319	5.31059	114.932	8.14432e-27	4.35882e-25	ENSMUSG00000015305	-0.711916	6.81857	142.583	7.25064e-33	3.90027e-31	ENSMUSG00000075066	-5.62473	-0.973801	135.003	3.29663e-31	1.80204e-29	ENSMUSG00000028825	-2.08305	2.6192	80.3636	3.11477e-19	1.51407e-17	ENSMUSG00000048960	0.82451	5.55122	98.0819	4.01429e-23	1.97866e-21	ENSMUSG00000037375	1.75103	1.60801	135.622	2.41372e-31	1.20573e-29	ENSMUSG00000020657	1.16854	5.35314	118.049	1.69176e-27	8.56005e-26	ENSMUSG00000039126	2.00885
ENSMUSG00000047205	-1.24963	4.38436	120.922	3.97495e-28	2.08529e-26	ENSMUSG00000012405	0.359722	7.05817	114.865	8.42239e-27	4.48842e-25	ENSMUSG00000027875	-1.4375	3.15548	142.457	7.7276e-33	4.14199e-31	ENSMUSG00000006850	-1.33381	2.88837	134.668	3.90164e-31	2.12514e-29	ENSMUSG00000039682	0.596008	6.40521	80.3589	3.12225e-19	1.51407e-17	ENSMUSG00000073609	-1.41516	4.56114	97.9353	4.32272e-23	2.12307e-21	ENSMUSG00000053192	1.57336	3.4088	135.523	2.5369e-31	1.26274e-29	ENSMUSG00000036499	0.886297	6.21413	117.997	1.73632e-27	8.75414e-26	ENSMUSG00000024008	3.00027
ENSMUSG00000043629	-0.813792	3.8358	120.535	4.83141e-28	2.52557e-26	ENSMUSG00000025008	-0.631652	4.16484	114.855	8.46471e-27	4.48842e-25	ENSMUSG00000036086	1.02329	3.46024	142.24	8.61802e-33	4.60282e-31	ENSMUSG00000038122	-1.40313	4.22628	134	5.4647e-31	2.96591e-29	ENSMUSG00000063694	0.772722	9.7682	80.2503	3.2987e-19	1.58924e-17	ENSMUSG00000005716	-3.52006	-0.542179	97.7228	4.81242e-23	2.35517e-21	ENSMUSG00000028837	-0.573451	6.06869	134.945	3.39499e-31	1.68384e-29	ENSMUSG00000029729	0.754604	5.09305	117.156	2.65409e-27	1.33337e-25	ENSMUSG00000027495	1.19311
ENSMUSG00000071178	-3.66482	-0.803677	120.228	5.63959e-28	2.93759e-26	ENSMUSG00000040843	0.437159	5.48677	114.853	8.47666e-27	4.48842e-25	ENSMUSG00000014077	-0.380278	6.88749	141.757	1.09896e-32	5.84863e-31	ENSMUSG00000026927	0.673929	6.81525	133.692	6.38105e-31	3.45097e-29	ENSMUSG00000019817	-1.61961	3.76055	80.2491	3.30067e-19	1.58924e-17	ENSMUSG00000039903	-1.95154	0.833708	97.564	5.21443e-23	2.54286e-21	ENSMUSG00000022706	0.693539	5.18051	134.728	3.78691e-31	1.87157e-29	ENSMUSG00000033356	-1.52119	1.24336	116.661	3.40548e-27	1.70479e-25	ENSMUSG00000038521	-1.46132
ENSMUSG00000006589	0.84219	4.38572	119.639	7.58785e-28	3.93844e-26	ENSMUSG00000027130	-0.452084	6.45983	114.724	9.0427e-27	4.77122e-25	ENSMUSG00000005150	0.576147	4.53228	141.231	1.43248e-32	7.5967e-31	ENSMUSG00000027353	0.890163	2.49343	132.665	1.07058e-30	5.76939e-29	ENSMUSG00000036292	-2.55467	0.295245	80.217	3.35464e-19	1.60952e-17	ENSMUSG00000042249	-1.70235	5.24543	96.8921	7.32118e-23	3.55763e-21	ENSMUSG00000020042	-2.44488	1.65394	134.526	4.19227e-31	2.06458e-29	ENSMUSG00000113255	1.19886	2.11622	116.599	3.5137e-27	1.75275e-25	ENSMUSG00000001802	1.46606
ENSMUSG00000027597	0.76302	4.24934	119.219	9.37618e-28	4.84953e-26	ENSMUSG00000027435	1.04502	3.24609	114.375	1.07872e-26	5.67161e-25	ENSMUSG00000092009	-2.98574	1.25902	140.806	1.77441e-32	9.3769e-31	ENSMUSG00000089798	-2.961	-0.585367	132.634	1.08722e-30	5.83846e-29	ENSMUSG00000028898	-0.758959	4.07259	80.2064	3.37269e-19	1.61248e-17	ENSMUSG00000023330	1.09644	2.69376	96.7408	7.90231e-23	3.8265e-21	ENSMUSG00000036552	-1.26479	2.28276	134.356	4.56738e-31	2.24139e-29	ENSMUSG00000054206	-1.96158	2.4488	116.418	3.85067e-27	1.91408e-25	ENSMUSG00000020546	-1.10886
ENSMUSG00000030079	-0.650818	4.48842	118.873	1.11662e-27	5.75512e-26	ENSMUSG00000020014	-1.33863	4.46122	114.349	1.09266e-26	5.72477e-25	ENSMUSG00000018196	-0.623284	6.20867	140.496	2.07359e-32	1.09194e-30	ENSMUSG00000041144	-2.08955	3.85289	132.521	1.15082e-30	6.15831e-29	ENSMUSG00000034714	1.26293	2.95764	80.1625	3.44849e-19	1.64293e-17	ENSMUSG00000026429	1.39594	2.00393	96.6653	8.20975e-23	3.96142e-21	ENSMUSG00000032263	0.876296	5.91687	134.207	4.92197e-31	2.40247e-29	ENSMUSG00000067924	1.24914	3.53423	116.257	4.17468e-27	2.06786e-25	ENSMUSG00000035031	1.62352
ENSMUSG00000046516	0.544553	5.59846	118.853	1.12797e-27	5.79329e-26	ENSMUSG00000008028	1.62148	1.1176	114.337	1.09951e-26	5.74051e-25	ENSMUSG00000037134	0.600868	4.99936	140.367	2.21316e-32	1.16137e-30	ENSMUSG00000021470	-0.683862	5.14307	131.971	1.51791e-30	8.09427e-29	ENSMUSG00000040666	0.65163	7.81155	80.0835	3.58916e-19	1.70397e-17	ENSMUSG00000025650	-1.69562	1.02262	96.6322	8.34793e-23	4.01401e-21	ENSMUSG00000024901	1.23927	3.26016	134.204	4.93009e-31	2.40247e-29	ENSMUSG00000095990	-5.16466	0.817688	115.897	5.00598e-27	2.47096e-25	ENSMUSG00000027895	4.06018
ENSMUSG00000037348	0.589532	6.05702	118.529	1.32816e-27	6.79768e-26	ENSMUSG00000026553	0.328877	7.85155	114.135	1.21715e-26	6.33255e-25	ENSMUSG00000001025	1.10271	3.74906	140.139	2.48266e-32	1.29825e-30	ENSMUSG00000024421	-1.5195	3.88841	131.933	1.54729e-30	8.22223e-29	ENSMUSG00000045672	-1.18243	2.89025	79.9274	3.88427e-19	1.83765e-17	ENSMUSG00000039661	-3.4647	1.74455	96.5854	8.54754e-23	4.09567e-21	ENSMUSG00000040479	0.946983	6.76292	133.956	5.58729e-31	2.71324e-29	ENSMUSG00000015083	-3.27217	0.669488	115.86	5.10109e-27	2.50913e-25	ENSMUSG00000051890	1.37185
ENSMUSG00000017561	-0.610825	3.83941	118.503	1.34537e-27	6.86187e-26	ENSMUSG00000061313	0.541924	6.86311	113.984	1.31351e-26	6.81016e-25	ENSMUSG00000052026	0.672744	6.31907	139.994	2.67061e-32	1.39168e-30	ENSMUSG00000058407	-0.516949	5.36459	131.645	1.78947e-30	9.4761e-29	ENSMUSG00000039661	-3.58389	1.633	79.8625	4.01395e-19	1.89241e-17	ENSMUSG00000082361	1.27645	1.89887	96.5517	8.69419e-23	4.15147e-21	ENSMUSG00000048731	1.33242	4.63386	133.6	6.68148e-31	3.23333e-29	ENSMUSG00000036046	-0.807111	5.93675	115.747	5.39939e-27	2.64664e-25	ENSMUSG00000054612	2.67517
ENSMUSG00000029636	0.368639	7.54128	118.451	1.3811e-27	7.01973e-26	ENSMUSG00000006542	-2.82571	1.21015	113.76	1.47091e-26	7.59986e-25	ENSMUSG00000006642	2.29901	0.0522042	139.852	2.86838e-32	1.48958e-30	ENSMUSG00000027940	0.526322	6.30236	131.622	1.81005e-30	9.55193e-29	ENSMUSG00000017344	0.797911	4.36848	79.829	4.08263e-19	1.91813e-17	ENSMUSG00000059005	0.614369	7.99053	96.4826	9.00339e-23	4.28424e-21	ENSMUSG00000019194	-1.49812	4.20093	133.118	8.51844e-31	4.10801e-29	ENSMUSG00000025939	0.681981	4.91192	115.334	6.64839e-27	3.24759e-25	ENSMUSG00000027907	-1.79254
ENSMUSG00000082815	3.35051	-0.252888	118.429	1.39652e-27	7.07189e-26	ENSMUSG00000030861	0.427224	6.48805	113.367	1.79303e-26	9.23225e-25	ENSMUSG00000109293	-4.48696	-0.986626	139.521	3.38765e-32	1.75317e-30	ENSMUSG00000028675	0.634032	5.7162	131.428	1.99624e-30	1.04982e-28	ENSMUSG00000048004	-4.10588	1.59862	79.818	4.10546e-19	1.9222e-17	ENSMUSG00000027070	-2.58942	3.45861	96.1842	1.04675e-22	4.96375e-21	ENSMUSG00000000739	-4.1741	0.194101	133.103	8.58428e-31	4.12549e-29	ENSMUSG00000028468	0.611328	6.00069	115.071	7.59306e-27	3.69625e-25	ENSMUSG00000021461	-1.2082
ENSMUSG00000036403	-0.838216	4.089	118.423	1.40099e-27	7.07189e-26	ENSMUSG00000021932	0.867948	3.04584	113.094	2.05732e-26	1.05567e-24	ENSMUSG00000030272	0.491088	6.42356	139.496	3.43085e-32	1.76942e-30	ENSMUSG00000020216	1.78863	1.36745	131.331	2.09599e-30	1.09849e-28	ENSMUSG00000036918	-1.22368	4.46104	79.7951	4.15317e-19	1.93786e-17	ENSMUSG00000025008	-1.03376	2.70646	96.1177	1.08254e-22	5.11584e-21	ENSMUSG00000034758	1.31815	2.84746	133.008	9.00311e-31	4.3119e-29	ENSMUSG00000075706	-0.961881	8.17348	114.955	8.05134e-27	3.90587e-25	ENSMUSG00000032425	-1.87064
ENSMUSG00000001911	0.509067	7.85115	118.057	1.68502e-27	8.47648e-26	ENSMUSG00000057863	0.695602	6.4609	113.072	2.08103e-26	1.06418e-24	ENSMUSG00000027245	1.09742	2.46263	139.465	3.48455e-32	1.79096e-30	ENSMUSG00000026005	0.526692	4.79095	131.071	2.38956e-30	1.24806e-28	ENSMUSG00000022177	-1.02853	2.32408	79.6366	4.5002e-19	2.09259e-17	ENSMUSG00000053441	-1.68737	3.01804	95.9643	1.16976e-22	5.50907e-21	ENSMUSG00000061603	0.932413	8.46488	132.737	1.03222e-30	4.92673e-29	ENSMUSG00000021456	2.02727	3.73996	114.911	8.22958e-27	3.97866e-25	ENSMUSG00000052833	0.712113
ENSMUSG00000040272	-1.65758	1.92309	118	1.73387e-27	8.69241e-26	ENSMUSG00000027663	-0.712773	6.42313	112.742	2.45799e-26	1.25265e-24	ENSMUSG00000034616	-0.729536	5.09533	139.218	3.94565e-32	2.02104e-30	ENSMUSG00000016257	-0.531672	5.15341	130.916	2.58322e-30	1.34459e-28	ENSMUSG00000020253	-0.774605	3.55789	78.9441	6.38913e-19	2.9608e-17	ENSMUSG00000035226	-2.12384	1.68642	95.8811	1.21993e-22	5.72578e-21	ENSMUSG00000029998	0.576372	6.85168	132.243	1.32368e-30	6.2963e-29	ENSMUSG00000025266	0.9591	6.09867	114.552	9.8651e-27	4.75309e-25	ENSMUSG00000073755	1.39444
ENSMUSG00000048373	-1.66115	1.13507	117.909	1.81538e-27	9.07012e-26	ENSMUSG00000025159	0.476143	5.80872	112.019	3.53941e-26	1.79764e-24	ENSMUSG00000117145	2.67146	-0.978135	139.175	4.03275e-32	2.05862e-30	ENSMUSG00000036687	2.22418	0.775347	130.779	2.76735e-30	1.43554e-28	ENSMUSG00000020413	0.668527	4.55161	78.7025	7.22037e-19	3.33463e-17	ENSMUSG00000020473	-1.78179	6.06937	95.6844	1.34736e-22	6.28426e-21	ENSMUSG00000006179	3.32451	-1.20184	131.223	2.21271e-30	1.04893e-28	ENSMUSG00000015377	1.22437	4.66775	114.444	1.04192e-26	5.003e-25	ENSMUSG00000026544	2.51615
ENSMUSG00000039765	-0.915139	5.033	117.692	2.02529e-27	1.00846e-25	ENSMUSG00000056531	-1.72649	0.868541	111.948	3.6682e-26	1.85673e-24	ENSMUSG00000035725	-0.665026	4.35829	138.866	4.71308e-32	2.39776e-30	ENSMUSG00000023764	-1.36859	4.72592	130.651	2.95252e-30	1.5264e-28	ENSMUSG00000024174	1.25799	2.89762	78.6225	7.51888e-19	3.46072e-17	ENSMUSG00000050708	-1.93635	7.96789	95.6834	1.34806e-22	6.28426e-21	ENSMUSG00000034345	0.784569	5.46281	130.953	2.53538e-30	1.19782e-28	ENSMUSG00000059412	3.77731	3.86072	113.963	1.32745e-26	6.35243e-25	ENSMUSG00000064115	-3.215
ENSMUSG00000028936	0.410453	6.37981	117.434	2.30655e-27	1.14462e-25	ENSMUSG00000027879	0.396135	6.22529	111.914	3.73086e-26	1.88207e-24	ENSMUSG00000095990	-5.57999	-0.215661	138.063	7.05935e-32	3.57928e-30	ENSMUSG00000039686	-0.475698	7.40227	130.232	3.6453e-30	1.87819e-28	ENSMUSG00000048707	0.991693	2.79044	78.383	8.48816e-19	3.89365e-17	ENSMUSG00000010608	0.695517	7.11952	95.3996	1.55586e-22	7.22844e-21	ENSMUSG00000023868	1.28879	2.91828	130.911	2.58896e-30	1.219e-28	ENSMUSG00000073633	-2.77573	0.401981	113.778	1.45754e-26	6.95136e-25	ENSMUSG00000044949	1.59561
ENSMUSG00000028010	0.601516	4.0214	117.149	2.66352e-27	1.31732e-25	ENSMUSG00000064368	1.90969	7.02067	111.872	3.81072e-26	1.91588e-24	ENSMUSG00000020634	-1.15666	6.04341	137.923	7.57571e-32	3.82816e-30	ENSMUSG00000042485	1.54931	0.994301	130.142	3.81437e-30	1.95868e-28	ENSMUSG00000034424	0.635997	5.45498	78.0947	9.82186e-19	4.49028e-17	ENSMUSG00000026822	-2.18256	1.55728	95.3902	1.56324e-22	7.23826e-21	ENSMUSG00000059586	-0.745208	4.10285	130.828	2.69954e-30	1.26678e-28	ENSMUSG00000050944	1.95662	0.569958	113.407	1.75756e-26	8.35404e-25	ENSMUSG00000030556	1.40443
ENSMUSG00000026683	1.62237	1.25771	117.142	2.67249e-27	1.31732e-25	ENSMUSG00000008307	-1.22812	2.81754	111.688	4.18118e-26	2.09508e-24	ENSMUSG00000004626	-1.31542	3.92397	137.874	7.76535e-32	3.91082e-30	ENSMUSG00000034105	0.69877	3.87618	129.382	5.59428e-30	2.86303e-28	ENSMUSG00000027864	-0.841948	5.89898	77.9722	1.04499e-18	4.76137e-17	ENSMUSG00000000276	0.893371	5.48434	95.1548	1.76065e-22	8.12498e-21	ENSMUSG00000052613	-4.39855	0.330964	130.532	3.13497e-30	1.46618e-28	ENSMUSG00000049235	1.99025	-0.0778676	113.203	1.94752e-26	9.22588e-25	ENSMUSG00000037493	1.8686
ENSMUSG00000063882	0.526816	7.38522	117.003	2.8668e-27	1.40838e-25	ENSMUSG00000034152	-0.51323	6.75907	111.679	4.20185e-26	2.09839e-24	ENSMUSG00000030302	-0.464328	9.47369	137.612	8.85978e-32	4.44708e-30	ENSMUSG00000026407	-1.70379	1.15812	129.189	6.16635e-30	3.14525e-28	ENSMUSG00000005362	0.824567	5.77236	77.9522	1.05566e-18	4.79391e-17	ENSMUSG00000027993	-1.22176	3.22248	95.1373	1.77629e-22	8.16975e-21	ENSMUSG00000089876	2.09658	-0.27734	130.51	3.16979e-30	1.47751e-28	ENSMUSG00000029464	0.761705	4.55962	113.098	2.05379e-26	9.6968e-25	ENSMUSG00000019906	2.58555
ENSMUSG00000024896	-0.511542	5.02875	116.53	3.63754e-27	1.78106e-25	ENSMUSG00000050967	-0.742032	6.63956	111.649	4.26483e-26	2.12275e-24	ENSMUSG00000060336	0.972866	3.24769	137.317	1.02799e-31	5.14268e-30	ENSMUSG00000029149	1.51908	0.334283	128.937	6.99951e-30	3.55832e-28	ENSMUSG00000033439	0.896951	2.99134	76.9506	1.75292e-18	7.93372e-17	ENSMUSG00000075415	-0.602839	6.29068	94.9087	1.99373e-22	9.13924e-21	ENSMUSG00000040875	2.03003	2.38272	130.263	3.58899e-30	1.66733e-28	ENSMUSG00000040875	2.03971	2.294	112.501	2.77467e-26	1.30567e-24	ENSMUSG00000021939	1.20209
ENSMUSG00000057863	0.601409	6.5077	116.477	3.73722e-27	1.82379e-25	ENSMUSG00000028467	-0.537697	6.12998	111.536	4.51592e-26	2.24026e-24	ENSMUSG00000021364	0.7575	5.02591	137.159	1.11324e-31	5.55068e-30	ENSMUSG00000022515	0.65964	5.75909	128.83	7.38763e-30	3.74315e-28	ENSMUSG00000034810	-0.877716	5.37477	76.8845	1.81259e-18	8.17651e-17	ENSMUSG00000021559	-0.71134	5.89586	94.7125	2.20146e-22	1.0058e-20	ENSMUSG00000074220	1.3702	1.45763	130.117	3.86353e-30	1.7889e-28	ENSMUSG00000034683	-5.32324	2.54117	112.297	3.07573e-26	1.44253e-24	ENSMUSG00000043467	-1.0375
ENSMUSG00000040365	0.520382	6.05975	116.148	4.41185e-27	2.14588e-25	ENSMUSG00000090733	0.612387	6.80604	111.321	5.03249e-26	2.48825e-24	ENSMUSG00000070953	-0.557936	4.23207	136.929	1.24997e-31	6.21176e-30	ENSMUSG00000020485	-0.640787	4.54717	128.37	9.31365e-30	4.70339e-28	ENSMUSG00000050222	-1.69727	0.833359	76.8071	1.88502e-18	8.47511e-17	ENSMUSG00000046688	-1.38	2.59201	94.3718	2.6149e-22	1.19073e-20	ENSMUSG00000033735	-1.73899	5.489	130.075	3.94579e-30	1.82094e-28	ENSMUSG00000074867	-2.51166	0.829595	112.206	3.21972e-26	1.50506e-24	ENSMUSG00000024998	1.05779
ENSMUSG00000035048	0.743437	4.58415	115.998	4.75801e-27	2.30662e-25	ENSMUSG00000025352	0.782411	5.19415	111.175	5.41592e-26	2.66899e-24	ENSMUSG00000042757	-0.649167	4.38913	136.873	1.28544e-31	6.36695e-30	ENSMUSG00000027610	0.596265	4.03854	128.359	9.36576e-30	4.7141e-28	ENSMUSG00000034245	-0.646818	4.84713	76.6359	2.05568e-18	9.2119e-17	ENSMUSG00000029185	-1.30647	4.90273	94.1885	2.86866e-22	1.30197e-20	ENSMUSG00000070366	4.55747	-0.642115	130.011	4.07431e-30	1.87405e-28	ENSMUSG00000035759	1.22161	2.40113	112.149	3.31433e-26	1.54417e-24	ENSMUSG00000037709	0.786236
ENSMUSG00000027890	1.37904	3.40344	115.717	5.4814e-27	2.64856e-25	ENSMUSG00000029452	1.50915	1.83998	110.667	7.00001e-26	3.43829e-24	ENSMUSG00000043300	-0.527462	5.45386	136.867	1.28969e-31	6.36699e-30	ENSMUSG00000026817	0.524368	6.88248	128.208	1.0107e-29	5.07048e-28	ENSMUSG00000025207	1.87116	0.796995	76.3229	2.40877e-18	1.07587e-16	ENSMUSG00000038725	-1.65808	6.04116	94.1755	2.88758e-22	1.30625e-20	ENSMUSG00000036046	-0.871319	5.92413	129.13	6.35344e-30	2.91276e-28	ENSMUSG00000030922	1.09438	3.33265	112.044	3.49496e-26	1.62297e-24	ENSMUSG00000036882	1.24737
ENSMUSG00000030321	-0.898284	2.68023	115.491	6.14436e-27	2.95917e-25	ENSMUSG00000033460	0.48374	6.5637	110.657	7.03495e-26	3.44413e-24	ENSMUSG00000042284	-0.938371	3.43027	136.259	1.75103e-31	8.6162e-30	ENSMUSG00000026694	0.625595	4.21803	127.871	1.19773e-29	5.98905e-28	ENSMUSG00000059005	0.658855	7.88493	76.021	2.80666e-18	1.24947e-16	ENSMUSG00000048373	-5.0025	2.6028	94.0819	3.02732e-22	1.36497e-20	ENSMUSG00000090799	1.31543	5.4045	128.832	7.38033e-30	3.37245e-28	ENSMUSG00000022515	0.62875	4.68967	111.455	4.70297e-26	2.17678e-24	ENSMUSG00000063253	1.36268
ENSMUSG00000045103	-0.495704	6.39524	115.359	6.56556e-27	3.15169e-25	ENSMUSG00000048222	0.842021	4.23935	110.511	7.57077e-26	3.69434e-24	ENSMUSG00000020888	0.654025	4.72999	136.206	1.79886e-31	8.82266e-30	ENSMUSG00000030158	3.15554	-1.30815	127.444	1.48498e-29	7.40113e-28	ENSMUSG00000027775	1.62492	6.48809	75.8565	3.05054e-18	1.3536e-16	ENSMUSG00000021694	0.85986	3.09794	93.8957	3.32596e-22	1.49473e-20	ENSMUSG00000029464	0.766099	4.5102	128.458	8.91284e-30	4.05942e-28	ENSMUSG00000028549	-1.18518	2.63283	111.257	5.19872e-26	2.39838e-24	ENSMUSG00000032220	0.831057
ENSMUSG00000024925	0.684654	4.02808	115.289	6.80267e-27	3.25487e-25	ENSMUSG00000071178	-3.07981	-0.648998	110.472	7.72399e-26	3.75683e-24	ENSMUSG00000034889	0.465222	4.98137	135.874	2.12559e-31	1.03912e-29	ENSMUSG00000030324	-2.90538	-0.0451006	127.347	1.55949e-29	7.74714e-28	ENSMUSG00000059493	2.10533	1.86857	75.7062	3.2917e-18	1.45585e-16	ENSMUSG00000039457	-1.58711	5.00551	93.6934	3.68393e-22	1.65021e-20	ENSMUSG00000039488	-5.42003	0.403771	128.396	9.19515e-30	4.17436e-28	ENSMUSG00000028158	-2.71137	3.21931	111.039	5.80326e-26	2.66856e-24	ENSMUSG00000031163	-1.29215
ENSMUSG00000087687	0.64163	4.12244	114.817	8.63168e-27	4.11658e-25	ENSMUSG00000034892	0.621899	8.06098	110.453	7.79643e-26	3.77975e-24	ENSMUSG00000033036	2.65047	-0.89707	135.524	2.53553e-31	1.2355e-29	ENSMUSG00000006673	-0.403212	6.29893	127.321	1.58022e-29	7.82464e-28	ENSMUSG00000037617	-1.76923	1.04307	75.4751	3.70041e-18	1.63131e-16	ENSMUSG00000061048	-2.62356	2.1116	93.6825	3.70422e-22	1.65391e-20	ENSMUSG00000000149	-1.14217	6.84871	128.369	9.31977e-30	4.2172e-28	ENSMUSG00000048856	-1.86333	1.55894	110.927	6.13889e-26	2.81373e-24	ENSMUSG00000019689	-1.05008
ENSMUSG00000036249	-0.623594	4.08584	114.61	9.57933e-27	4.55375e-25	ENSMUSG00000066800	1.40892	3.04794	110.27	8.54951e-26	4.13143e-24	ENSMUSG00000048856	-1.84894	1.4898	134.937	3.40774e-31	1.65512e-29	ENSMUSG00000033318	1.68853	3.50607	127.215	1.66704e-29	8.22783e-28	ENSMUSG00000025008	-0.871405	2.69716	75.4233	3.79879e-18	1.66925e-16	ENSMUSG00000031666	0.636352	6.19308	93.4867	4.08931e-22	1.81994e-20	ENSMUSG00000020657	1.0336	5.46493	128.27	9.79676e-30	4.41869e-28	ENSMUSG00000003721	0.634502	6.1813	110.859	6.35212e-26	2.90203e-24	ENSMUSG00000028024	-2.19168
ENSMUSG00000044080	0.521026	5.83101	114.479	1.02349e-26	4.84969e-25	ENSMUSG00000066149	0.526064	4.59961	110.202	8.84832e-26	4.26203e-24	ENSMUSG00000006673	-0.385753	6.28036	134.894	3.48278e-31	1.68611e-29	ENSMUSG00000031628	0.764298	4.60599	125.995	3.08183e-29	1.51616e-27	ENSMUSG00000009394	-2.69921	2.24606	75.4082	3.8279e-18	1.67662e-16	ENSMUSG00000021772	0.787461	5.53795	93.4618	4.14107e-22	1.83703e-20	ENSMUSG00000042246	3.30474	4.48835	128.258	9.85825e-30	4.43208e-28	ENSMUSG00000072974	-3.49177	-0.814006	110.648	7.06518e-26	3.21739e-24	ENSMUSG00000020458	0.856945
ENSMUSG00000049739	-0.488437	5.32966	114.366	1.08351e-26	5.11758e-25	ENSMUSG00000037239	0.79649	5.94137	110.182	8.94161e-26	4.29312e-24	ENSMUSG00000005983	-1.3178	1.14437	134.518	4.20826e-31	2.03079e-29	ENSMUSG00000074129	0.69337	4.14447	125.861	3.29844e-29	1.61751e-27	ENSMUSG00000074824	2.77639	0.0320684	75.0369	4.6199e-18	2.01701e-16	ENSMUSG00000040852	-1.72376	2.66006	93.3996	4.27327e-22	1.88958e-20	ENSMUSG00000039096	-1.31206	3.88289	127.924	1.166e-29	5.22527e-28	ENSMUSG00000008763	0.627905	5.83374	110.158	9.05063e-26	4.10829e-24	ENSMUSG00000071177	7.4867
ENSMUSG00000014782	-1.66859	2.43432	114.095	1.24235e-26	5.84902e-25	ENSMUSG00000071866	0.434715	9.17573	109.898	1.03157e-25	4.93697e-24	ENSMUSG00000020216	1.92797	1.59683	134.407	4.45161e-31	2.13654e-29	ENSMUSG00000045275	1.29133	3.06839	125.127	4.77469e-29	2.33394e-27	ENSMUSG00000068452	-1.47357	0.715839	75.002	4.70236e-18	2.03995e-16	ENSMUSG00000024754	-1.18086	5.36188	93.3515	4.37839e-22	1.92986e-20	ENSMUSG00000030922	0.902267	3.27834	127.288	1.60646e-29	7.17603e-28	ENSMUSG00000035934	0.901795	4.00209	109.77	1.10068e-25	4.98025e-24	ENSMUSG00000035337	2.49253
ENSMUSG00000053080	0.546495	5.77882	114.011	1.29589e-26	6.08159e-25	ENSMUSG00000020018	0.736268	3.97284	109.645	1.17227e-25	5.59243e-24	ENSMUSG00000006649	1.60153	1.84105	134.405	4.45586e-31	2.13654e-29	ENSMUSG00000037921	2.06912	1.74743	124.984	5.13019e-29	2.4997e-27	ENSMUSG00000026095	-1.14306	2.55862	75.002	4.70248e-18	2.03995e-16	ENSMUSG00000016918	-1.54686	6.55141	93.1784	4.77857e-22	2.09952e-20	ENSMUSG00000052302	1.97861	2.01763	127.25	1.63793e-29	7.29324e-28	ENSMUSG00000025916	4.07813	0.441407	109.328	1.3754e-25	6.20336e-24	ENSMUSG00000036964	2.67809
ENSMUSG00000027935	0.929819	2.96157	112.997	2.16148e-26	1.01115e-24	ENSMUSG00000027952	0.584758	5.35094	109.637	1.17692e-25	5.59676e-24	ENSMUSG00000021242	-0.666085	5.44294	134.075	5.26102e-31	2.51456e-29	ENSMUSG00000035694	2.05497	1.02889	124.631	6.12848e-29	2.97661e-27	ENSMUSG00000025481	-2.66438	-0.951802	74.9471	4.83496e-18	2.09073e-16	ENSMUSG00000037788	0.893876	5.46223	92.9298	5.41818e-22	2.36742e-20	ENSMUSG00000024735	-0.782921	7.99883	126.992	1.86568e-29	8.2809e-28	ENSMUSG00000010751	-1.97353	1.02377	109.069	1.56706e-25	7.02668e-24	ENSMUSG00000015405	1.44021
ENSMUSG00000107283	-0.603367	4.53495	112.928	2.23773e-26	1.04349e-24	ENSMUSG00000029623	0.366003	6.49214	109.53	1.24192e-25	5.8871e-24	ENSMUSG00000032534	-0.662351	4.84821	133.827	5.96235e-31	2.84073e-29	ENSMUSG00000027380	2.80203	-0.850742	124.274	7.3368e-29	3.55217e-27	ENSMUSG00000038859	-1.00201	3.41514	74.7501	5.34243e-18	2.30284e-16	ENSMUSG00000021606	1.12118	8.73258	92.9282	5.42276e-22	2.36742e-20	ENSMUSG00000026443	-2.22807	2.60916	126.605	2.26689e-29	1.00297e-27	ENSMUSG00000070044	1.41541	3.70822	109.068	1.5679e-25	7.02668e-24	ENSMUSG00000020491	-0.94817
ENSMUSG00000010277	-0.345988	8.40376	112.92	2.24624e-26	1.04415e-24	ENSMUSG00000030834	1.74394	1.92088	109.412	1.31839e-25	6.22983e-24	ENSMUSG00000008682	-0.634573	7.43405	133.511	6.98813e-31	3.31892e-29	ENSMUSG00000052914	0.883826	4.86796	124.183	7.68068e-29	3.69778e-27	ENSMUSG00000028957	-1.13674	3.4512	74.5506	5.91035e-18	2.53958e-16	ENSMUSG00000025510	0.719355	8.20959	92.8054	5.76974e-22	2.51093e-20	ENSMUSG00000011658	1.11232	4.40094	126.466	2.43156e-29	1.07243e-27	ENSMUSG00000029998	0.588411	6.80122	108.454	2.13726e-25	9.54801e-24	ENSMUSG00000038648	0.872076
ENSMUSG00000031659	0.963046	4.08799	112.786	2.40423e-26	1.11406e-24	ENSMUSG00000038233	-0.929851	3.41871	109.154	1.50168e-25	7.07352e-24	ENSMUSG00000118537	1.61996	0.757791	133.369	7.50589e-31	3.55358e-29	ENSMUSG00000010358	1.3214	1.56859	124.182	7.68604e-29	3.69778e-27	ENSMUSG00000028152	-1.15576	2.98112	73.9372	8.06427e-18	3.45415e-16	ENSMUSG00000061474	0.90176	6.37388	92.691	6.11308e-22	2.65196e-20	ENSMUSG00000025602	1.13775	2.99727	126.436	2.46896e-29	1.08549e-27	ENSMUSG00000029830	-5.69528	-0.482709	108.392	2.20533e-25	9.82101e-24	ENSMUSG00000020263	-1.2757
ENSMUSG00000057738	-0.311528	10.5033	112.776	2.4154e-26	1.11572e-24	ENSMUSG00000021572	-1.54027	2.40929	108.713	1.87536e-25	8.80593e-24	ENSMUSG00000024589	-0.558232	7.1062	132.966	9.19896e-31	4.34145e-29	ENSMUSG00000029576	0.624806	4.39055	123.49	1.08931e-28	5.22424e-27	ENSMUSG00000030750	-0.633823	4.60445	73.8515	8.42221e-18	3.59612e-16	ENSMUSG00000038525	-1.29506	3.19224	92.485	6.78358e-22	2.93358e-20	ENSMUSG00000031683	0.678524	4.76897	126.338	2.59279e-29	1.13634e-27	ENSMUSG00000053128	-3.13073	0.0731021	107.805	2.96557e-25	1.31651e-23	ENSMUSG00000033530	0.819409
ENSMUSG00000039191	0.621717	4.63997	112.619	2.61528e-26	1.20426e-24	ENSMUSG00000022898	-0.463943	5.02273	108.699	1.88867e-25	8.84062e-24	ENSMUSG00000022191	-0.4499	6.71725	132.931	9.35989e-31	4.40355e-29	ENSMUSG00000060336	1.07479	3.22619	123.401	1.13938e-28	5.44726e-27	ENSMUSG00000048486	0.656812	8.42897	73.7244	8.98234e-18	3.82327e-16	ENSMUSG00000007888	-2.68071	0.132358	92.4716	6.8299e-22	2.93686e-20	ENSMUSG00000026617	-0.943093	4.37328	126.332	2.60153e-29	1.1366e-27	ENSMUSG00000026048	0.717177	5.06807	107.787	2.99268e-25	1.32438e-23	ENSMUSG00000049556	3.06098
ENSMUSG00000027422	0.459779	6.5041	112.384	2.94355e-26	1.35118e-24	ENSMUSG00000028567	0.513906	4.77364	108.545	2.04189e-25	9.52798e-24	ENSMUSG00000048445	0.822029	3.47904	132.762	1.01923e-30	4.78021e-29	ENSMUSG00000023968	-2.32696	0.645065	123.13	1.30578e-28	6.22329e-27	ENSMUSG00000000386	2.62855	1.20322	73.6807	9.18344e-18	3.89665e-16	ENSMUSG00000006457	-3.36807	0.0856404	92.4704	6.83387e-22	2.93686e-20	ENSMUSG00000051669	-4.11624	3.82037	125.867	3.28831e-29	1.43216e-27	ENSMUSG00000041798	-4.58321	2.4489	107.729	3.082e-25	1.35964e-23	ENSMUSG00000045211	1.18611
ENSMUSG00000028470	1.27051	3.55367	112.173	3.27535e-26	1.4988e-24	ENSMUSG00000034424	0.521478	4.98609	108.262	2.35509e-25	1.09552e-23	ENSMUSG00000028902	0.526839	5.28109	131.663	1.77261e-30	8.28765e-29	ENSMUSG00000042647	2.16536	3.36102	123.115	1.31618e-28	6.25327e-27	ENSMUSG00000064360	2.54502	4.66075	73.6288	9.42781e-18	3.98787e-16	ENSMUSG00000013584	-1.73757	4.76371	92.3237	7.35983e-22	3.15303e-20	ENSMUSG00000036499	0.937776	6.26984	125.743	3.49939e-29	1.51934e-27	ENSMUSG00000095041	-5.31645	7.34318	107.197	4.03023e-25	1.77242e-23	ENSMUSG00000000402	1.52139
ENSMUSG00000056820	-0.407063	7.37335	111.792	3.96748e-26	1.80989e-24	ENSMUSG00000008822	0.875243	4.40965	108.104	2.5498e-25	1.18241e-23	ENSMUSG00000017667	-0.605492	5.25567	131.645	1.78921e-30	8.33925e-29	ENSMUSG00000048731	1.33686	1.61501	122.93	1.44482e-28	6.84313e-27	ENSMUSG00000034620	0.559468	4.91416	73.6104	9.51622e-18	4.01277e-16	ENSMUSG00000057092	-3.53893	1.55042	92.081	8.32003e-22	3.55332e-20	ENSMUSG00000073643	-0.948139	4.92207	125.736	3.51184e-29	1.52001e-27	ENSMUSG00000018868	-4.03416	-0.790312	107.05	4.3418e-25	1.90352e-23	ENSMUSG00000036580	0.947305
ENSMUSG00000015533	2.00024	0.184519	111.698	4.16004e-26	1.89185e-24	ENSMUSG00000024592	0.764137	3.6092	107.909	2.81416e-25	1.30096e-23	ENSMUSG00000016257	-0.562673	5.14567	131.531	1.89465e-30	8.8034e-29	ENSMUSG00000003849	1.2778	4.20533	122.778	1.55984e-28	7.36504e-27	ENSMUSG00000041012	-1.12627	2.38445	73.3458	1.08813e-17	4.57417e-16	ENSMUSG00000022747	0.940977	5.29817	91.9611	8.83994e-22	3.76368e-20	ENSMUSG00000095990	-6.37884	1.02443	125.654	3.66117e-29	1.57974e-27	ENSMUSG00000015217	0.861014	5.6773	106.474	5.80511e-25	2.53717e-23	ENSMUSG00000020946	-0.714525
ENSMUSG00000016427	0.785755	5.9315	111.465	4.67944e-26	2.12149e-24	ENSMUSG00000001911	0.537855	7.83884	107.863	2.8801e-25	1.32733e-23	ENSMUSG00000026616	4.93959	3.08497	131.495	1.92994e-30	8.93967e-29	ENSMUSG00000028681	1.17966	2.48308	122.473	1.81846e-28	8.55969e-27	ENSMUSG00000022766	-2.4399	1.29537	73.3032	1.11189e-17	4.65966e-16	ENSMUSG00000038600	-2.61258	1.02371	91.6973	1.01002e-21	4.28699e-20	ENSMUSG00000047033	1.87668	0.497739	125.374	4.21558e-29	1.81335e-27	ENSMUSG00000061603	0.956413	8.41174	106.281	6.39984e-25	2.78847e-23	ENSMUSG00000025481	-2.17527
ENSMUSG00000021798	-1.20727	2.65158	111.436	4.74911e-26	2.14645e-24	ENSMUSG00000006412	0.38052	6.26397	107.785	2.995e-25	1.37604e-23	ENSMUSG00000023764	-1.37611	4.71336	131.291	2.13852e-30	9.87535e-29	ENSMUSG00000068758	1.8902	2.45163	122.413	1.87418e-28	8.79482e-27	ENSMUSG00000025413	-0.592147	4.48065	73.2595	1.13675e-17	4.74918e-16	ENSMUSG00000068329	0.60731	4.94086	91.6062	1.05761e-21	4.47515e-20	ENSMUSG00000033036	2.92046	-1.41457	124.83	5.54518e-29	2.37794e-27	ENSMUSG00000018040	-0.923455	4.39218	106.217	6.60922e-25	2.87084e-23	ENSMUSG00000020534	0.841154
ENSMUSG00000035505	-0.730134	3.19477	111.407	4.81878e-26	2.17126e-24	ENSMUSG00000031283	-0.725308	4.03625	107.723	3.09113e-25	1.41585e-23	ENSMUSG00000027824	-2.84832	-0.173894	130.199	3.70715e-30	1.70665e-28	ENSMUSG00000026818	-2.8664	0.0968617	122.162	2.12691e-28	9.95015e-27	ENSMUSG00000062198	-1.00354	3.47502	73.2306	1.15355e-17	4.80457e-16	ENSMUSG00000089901	-5.16992	1.09383	91.4766	1.12921e-21	4.76347e-20	ENSMUSG00000024487	0.643482	4.73022	124.75	5.77243e-29	2.4678e-27	ENSMUSG00000015488	0.673691	6.25337	106.077	7.09349e-25	3.07174e-23	ENSMUSG00000021904	0.77961
ENSMUSG00000056531	-2.04477	0.744666	111.142	5.50944e-26	2.47487e-24	ENSMUSG00000110195	1.27325	3.48639	107.612	3.2683e-25	1.49242e-23	ENSMUSG00000010663	-0.446523	7.66345	129.86	4.39629e-30	2.01772e-28	ENSMUSG00000032363	1.70185	0.652069	121.855	2.48317e-28	1.15813e-26	ENSMUSG00000030309	-1.06567	2.58833	73.2015	1.17065e-17	4.86088e-16	ENSMUSG00000066842	-1.22108	6.40779	91.4348	1.15328e-21	4.85011e-20	ENSMUSG00000033214	3.31011	-1.55391	124.637	6.11182e-29	2.60491e-27	ENSMUSG00000110444	-1.07251	3.9245	105.95	7.56169e-25	3.26448e-23	ENSMUSG00000019178	2.61935
ENSMUSG00000058267	0.700887	5.19527	110.879	6.28845e-26	2.81619e-24	ENSMUSG00000042345	4.17981	0.543712	107.387	3.66137e-25	1.66681e-23	ENSMUSG00000026281	-0.678181	4.58254	129.835	4.45315e-30	2.03759e-28	ENSMUSG00000024589	-0.625882	7.14109	121.801	2.55193e-28	1.18657e-26	ENSMUSG00000053062	-0.970201	7.39699	73.1667	1.1915e-17	4.93237e-16	ENSMUSG00000029596	1.58578	3.78236	91.1891	1.30577e-21	5.47467e-20	ENSMUSG00000021266	0.682518	5.46908	124.432	6.7769e-29	2.87956e-27	ENSMUSG00000021266	0.676391	5.47974	105.672	8.69956e-25	3.74426e-23	ENSMUSG00000073491	4.66676
ENSMUSG00000040372	0.916055	4.03132	110.872	6.31293e-26	2.81856e-24	ENSMUSG00000028609	0.620469	4.25007	106.83	4.85048e-25	2.20144e-23	ENSMUSG00000082361	2.63766	1.20271	129.694	4.78145e-30	2.18115e-28	ENSMUSG00000059834	0.666183	4.22533	121.737	2.63519e-28	1.22156e-26	ENSMUSG00000053141	3.66894	2.47982	73.137	1.20953e-17	4.9918e-16	ENSMUSG00000027611	-2.33481	3.11831	91.1781	1.31307e-21	5.48074e-20	ENSMUSG00000024188	0.590024	5.65372	124.345	7.081e-29	2.99963e-27	ENSMUSG00000078974	-1.14588	5.78016	105.408	9.94e-25	4.26514e-23	ENSMUSG00000068220	-1.76466
ENSMUSG00000046668	0.424948	6.63526	110.325	8.31812e-26	3.70257e-24	ENSMUSG00000019978	-0.41121	6.63969	106.816	4.88423e-25	2.21004e-23	ENSMUSG00000035683	1.86175	0.168034	129.359	5.65871e-30	2.57351e-28	ENSMUSG00000092558	-0.611052	4.55233	121.616	2.80152e-28	1.29473e-26	ENSMUSG00000056763	0.720529	3.58377	73.0845	1.24217e-17	5.11098e-16	ENSMUSG00000028351	3.21457	-0.498885	91.1749	1.31519e-21	5.48074e-20	ENSMUSG00000038352	-3.52987	1.01722	124.043	8.24476e-29	3.48204e-27	ENSMUSG00000028883	-1.6386	3.11593	105.385	1.0056e-24	4.30183e-23	ENSMUSG00000078487	2.50413
ENSMUSG00000031672	-0.62787	7.3428	110.182	8.9379e-26	3.96643e-24	ENSMUSG00000034677	3.91916	-1.04858	106.766	5.00837e-25	2.25936e-23	ENSMUSG00000031575	0.396432	5.76679	129.23	6.03922e-30	2.73826e-28	ENSMUSG00000023367	1.12704	4.15752	121.502	2.96747e-28	1.36728e-26	ENSMUSG00000032717	-2.30923	1.12518	73.0517	1.26297e-17	5.18083e-16	ENSMUSG00000031198	0.585763	7.34247	91.1624	1.32349e-21	5.49869e-20	ENSMUSG00000060639	-7.30163	-0.0867326	123.83	9.17995e-29	3.86529e-27	ENSMUSG00000020325	-1.82837	2.29656	104.819	1.33814e-24	5.70711e-23	ENSMUSG00000020953	2.58442
ENSMUSG00000072704	0.54069	7.38656	109.782	1.09395e-25	4.84007e-24	ENSMUSG00000035399	0.756361	3.24516	106.412	5.99071e-25	2.69438e-23	ENSMUSG00000026818	-3.33876	0.149503	129.056	6.59253e-30	2.98014e-28	ENSMUSG00000005907	1.03096	5.46072	121.208	3.44122e-28	1.58079e-26	ENSMUSG00000075408	-1.35202	1.25831	72.9516	1.32871e-17	5.4341e-16	ENSMUSG00000029701	-0.764997	5.41139	90.9707	1.45818e-21	6.04002e-20	ENSMUSG00000003184	1.08052	5.24858	123.647	1.00633e-28	4.22448e-27	ENSMUSG00000029373	-2.11004	4.59023	104.715	1.41006e-24	5.99573e-23	ENSMUSG00000026036	1.07017
ENSMUSG00000063646	0.993105	3.75617	109.557	1.22517e-25	5.40435e-24	ENSMUSG00000053398	-0.900499	5.10249	106.366	6.13045e-25	2.74895e-23	ENSMUSG00000025017	1.0583	2.10792	128.943	6.97977e-30	3.14572e-28	ENSMUSG00000037833	-2.75496	-0.0542012	120.937	3.94419e-28	1.80639e-26	ENSMUSG00000020523	0.481724	5.68813	72.9128	1.35509e-17	5.52533e-16	ENSMUSG00000005362	0.721427	5.62329	90.8813	1.52556e-21	6.30016e-20	ENSMUSG00000037610	4.89827	-0.13628	123.631	1.01485e-28	4.24745e-27	ENSMUSG00000021592	1.08842	3.81979	104.356	1.69056e-24	7.16684e-23	ENSMUSG00000026579	4.79943
ENSMUSG00000002324	-3.69521	0.456199	109.215	1.45621e-25	6.40427e-24	ENSMUSG00000010529	1.64396	2.00806	106.354	6.16751e-25	2.75728e-23	ENSMUSG00000091387	-1.20434	3.33629	128.766	7.63054e-30	3.42233e-28	ENSMUSG00000050700	2.45585	1.67593	120.868	4.08394e-28	1.8648e-26	ENSMUSG00000028396	0.79026	6.68236	72.7658	1.45985e-17	5.9211e-16	ENSMUSG00000021699	-1.38948	4.38125	90.6924	1.67836e-21	6.91043e-20	ENSMUSG00000053886	-1.89238	3.98736	123.433	1.12114e-28	4.67822e-27	ENSMUSG00000002980	-1.23373	7.87327	104.329	1.7134e-24	7.24193e-23	ENSMUSG00000030824	1.0007
ENSMUSG00000028759	0.306558	7.85724	108.795	1.79947e-25	7.89028e-24	ENSMUSG00000069117	-0.650112	3.8191	106.148	6.84216e-25	3.04977e-23	ENSMUSG00000038023	-0.473956	6.28295	128.764	7.63914e-30	3.42233e-28	ENSMUSG00000014778	1.19493	2.78112	120.703	4.43808e-28	2.02045e-26	ENSMUSG00000072494	1.90456	0.859396	72.7644	1.46087e-17	5.9211e-16	ENSMUSG00000027318	-2.08021	2.94365	90.6541	1.7112e-21	7.02459e-20	ENSMUSG00000002608	-0.82883	5.42492	122.983	1.40669e-28	5.85224e-27	ENSMUSG00000054843	0.866357	6.04967	104.306	1.73329e-24	7.30414e-23	ENSMUSG00000054422	-4.67092
ENSMUSG00000034206	-1.63672	1.13409	108.73	1.8594e-25	8.1288e-24	ENSMUSG00000020056	0.628418	3.77845	105.895	7.77318e-25	3.45444e-23	ENSMUSG00000096199	0.740626	3.31901	128.479	8.81627e-30	3.93793e-28	ENSMUSG00000005983	-1.41042	1.17096	120.077	6.08614e-28	2.76249e-26	ENSMUSG00000028937	-1.11265	5.77003	72.7318	1.48523e-17	6.0019e-16	ENSMUSG00000025903	0.72592	6.06286	90.5999	1.75869e-21	7.19807e-20	ENSMUSG00000020381	1.16007	1.31224	122.906	1.46233e-28	6.06563e-27	ENSMUSG00000025602	1.07185	2.99842	104.28	1.75684e-24	7.38135e-23	ENSMUSG00000028931	2.03823
ENSMUSG00000042210	0.911557	4.33549	108.266	2.34983e-25	1.02423e-23	ENSMUSG00000045795	-0.960396	4.1347	105.878	7.84206e-25	3.47471e-23	ENSMUSG00000023031	1.82317	0.933133	128.102	1.06601e-29	4.74737e-28	ENSMUSG00000020315	-0.398808	10.2351	119.977	6.40028e-28	2.89646e-26	ENSMUSG00000028036	-3.3633	3.01955	72.6973	1.51139e-17	6.08951e-16	ENSMUSG00000036860	1.02021	5.54774	90.4082	1.93757e-21	7.90665e-20	ENSMUSG00000014075	1.2394	3.64284	122.463	1.82804e-28	7.56005e-27	ENSMUSG00000040713	-0.876317	6.26928	104.177	1.85007e-24	7.74999e-23	ENSMUSG00000040471	-2.73227
ENSMUSG00000046364	0.395412	7.45215	108.085	2.5755e-25	1.11928e-23	ENSMUSG00000056820	-0.490221	7.38057	105.87	7.87493e-25	3.47895e-23	ENSMUSG00000021552	0.954636	4.46147	127.812	1.23367e-29	5.47779e-28	ENSMUSG00000037287	-0.398882	5.77199	119.483	8.2114e-28	3.70509e-26	ENSMUSG00000074862	-3.26648	0.180299	72.6903	1.5168e-17	6.09323e-16	ENSMUSG00000029123	-2.67885	1.53308	90.3724	1.97302e-21	8.0275e-20	ENSMUSG00000029330	1.46879	5.80812	122.412	1.87568e-28	7.73413e-27	ENSMUSG00000026617	-0.893807	4.39311	104.043	1.97974e-24	8.26864e-23	ENSMUSG00000045573	2.39631
ENSMUSG00000059534	0.494229	6.44148	107.847	2.90421e-25	1.25841e-23	ENSMUSG00000044968	-0.888707	3.98602	105.31	1.04434e-24	4.60003e-23	ENSMUSG00000051499	0.897783	2.77967	127.649	1.33941e-29	5.92975e-28	ENSMUSG00000030056	-0.875974	3.81471	119.404	8.54385e-28	3.84372e-26	ENSMUSG00000042694	0.922648	4.10394	72.6821	1.52307e-17	6.10037e-16	ENSMUSG00000035984	1.58423	1.65724	90.3645	1.98087e-21	8.03569e-20	ENSMUSG00000024598	-3.11662	1.28985	122.08	2.21721e-28	9.11541e-27	ENSMUSG00000025089	-1.60504	3.01862	104.017	2.00575e-24	8.35258e-23	ENSMUSG00000056121	-1.01938
ENSMUSG00000118662	-0.635131	4.1888	107.821	2.94134e-25	1.27074e-23	ENSMUSG00000052419	0.50186	4.98785	105.298	1.05077e-24	4.61473e-23	ENSMUSG00000006818	-0.955257	7.49316	127.577	1.38912e-29	6.13173e-28	ENSMUSG00000097392	-0.560317	6.20458	119.348	8.78974e-28	3.94272e-26	ENSMUSG00000069515	4.25637	4.1571	72.64	1.55597e-17	6.21381e-16	ENSMUSG00000062210	1.23598	5.97704	90.2451	2.10406e-21	8.5103e-20	ENSMUSG00000028965	3.13139	-0.175889	121.929	2.39221e-28	9.80596e-27	ENSMUSG00000073684	-1.28168	2.51465	103.951	2.07371e-24	8.61015e-23	ENSMUSG00000031762	2.4801
ENSMUSG00000054079	0.595294	4.87828	107.598	3.29286e-25	1.41844e-23	ENSMUSG00000040842	0.760741	5.65048	104.546	1.53555e-24	6.72398e-23	ENSMUSG00000037818	0.843622	4.72488	127.348	1.55861e-29	6.8597e-28	ENSMUSG00000025217	-0.505675	6.39014	119.262	9.17531e-28	4.1036e-26	ENSMUSG00000068115	-1.27071	2.46379	72.5992	1.58844e-17	6.32489e-16	ENSMUSG00000055653	-2.19193	5.04249	90.2222	2.12864e-21	8.58447e-20	ENSMUSG00000030717	-1.95341	2.50766	121.688	2.70086e-28	1.10387e-26	ENSMUSG00000068011	-4.47217	-0.681537	103.907	2.12039e-24	8.77818e-23	ENSMUSG00000075273	1.60621
ENSMUSG00000032556	-2.76254	1.36212	107.576	3.32945e-25	1.43001e-23	ENSMUSG00000032556	-2.58001	1.04488	104.457	1.60661e-24	7.01377e-23	ENSMUSG00000039347	0.440762	8.28321	127.187	1.69101e-29	7.42065e-28	ENSMUSG00000043664	2.91632	-0.840763	119.203	9.45258e-28	4.21524e-26	ENSMUSG00000092416	-0.918682	3.76088	72.574	1.60885e-17	6.38741e-16	ENSMUSG00000020715	-0.773174	4.61943	90.1095	2.25332e-21	9.06072e-20	ENSMUSG00000006378	-2.76186	-0.108938	121.636	2.77275e-28	1.12994e-26	ENSMUSG00000020135	-2.18024	2.80403	103.876	2.15388e-24	8.89075e-23	ENSMUSG00000044827	2.03476
ENSMUSG00000040860	0.979613	5.5149	107.556	3.36336e-25	1.44036e-23	ENSMUSG00000063511	0.417597	8.9055	104.451	1.61112e-24	7.01377e-23	ENSMUSG00000048814	-0.385976	7.91164	127.073	1.79034e-29	7.83367e-28	ENSMUSG00000032840	-0.465249	5.53576	119.065	1.01335e-27	4.5057e-26	ENSMUSG00000040797	1.7033	1.33959	72.5377	1.6387e-17	6.48697e-16	ENSMUSG00000074264	-1.63511	3.69935	89.9647	2.42449e-21	9.69912e-20	ENSMUSG00000034755	4.52349	0.828146	121.02	3.78208e-28	1.53676e-26	ENSMUSG00000031568	0.878677	5.63378	103.633	2.43426e-24	1.00188e-22	ENSMUSG00000026103	1.21297
ENSMUSG00000007987	0.522781	5.82006	107.547	3.37882e-25	1.44278e-23	ENSMUSG00000017404	0.437655	7.16934	104.279	1.75744e-24	7.62853e-23	ENSMUSG00000039934	-1.13308	3.81081	126.691	2.17031e-29	9.4686e-28	ENSMUSG00000026617	-0.455475	5.74511	118.923	1.08861e-27	4.82629e-26	ENSMUSG00000030614	0.571352	5.28988	72.3447	1.80707e-17	7.13268e-16	ENSMUSG00000029462	0.628812	5.73898	89.9633	2.42619e-21	9.69912e-20	ENSMUSG00000054894	0.768428	4.86892	120.85	4.12048e-28	1.66939e-26	ENSMUSG00000028057	-0.741651	5.52367	103.586	2.49312e-24	1.02312e-22	ENSMUSG00000024085	0.739291
ENSMUSG00000054594	-3.68952	-0.400536	107.525	3.41593e-25	1.45439e-23	ENSMUSG00000027777	0.92184	3.3559	104.191	1.8371e-24	7.95117e-23	ENSMUSG00000021891	0.660178	4.58787	126.574	2.3026e-29	1.00166e-27	ENSMUSG00000040713	-0.978534	5.02126	118.373	1.4365e-27	6.35015e-26	ENSMUSG00000003949	-0.909543	3.52087	72.3078	1.84121e-17	7.24637e-16	ENSMUSG00000016356	-2.07254	1.69149	89.9208	2.47883e-21	9.87377e-20	ENSMUSG00000090213	-1.01114	4.1183	120.593	4.69065e-28	1.89489e-26	ENSMUSG00000073680	-2.76075	0.211458	103.462	2.65426e-24	1.08609e-22	ENSMUSG00000025413	-0.86397
ENSMUSG00000044550	0.698821	6.51667	107.502	3.455e-25	1.46678e-23	ENSMUSG00000079480	0.687811	3.93118	104.151	1.87472e-24	8.09056e-23	ENSMUSG00000037997	-0.493031	4.39501	126.502	2.38752e-29	1.03561e-27	ENSMUSG00000015083	-2.81418	-0.0240223	118.134	1.62055e-27	7.14305e-26	ENSMUSG00000039137	-1.51786	4.67663	72.2982	1.85015e-17	7.26052e-16	ENSMUSG00000064225	0.893604	6.70586	89.9165	2.48424e-21	9.87377e-20	ENSMUSG00000066456	1.96484	3.7707	120.251	5.5738e-28	2.24515e-26	ENSMUSG00000039110	1.93542	0.938525	103.004	3.34406e-24	1.3644e-22	ENSMUSG00000039616	1.42102
ENSMUSG00000022025	-1.99722	0.297848	107.471	3.50957e-25	1.48565e-23	ENSMUSG00000019897	-0.665886	4.48733	103.423	2.7073e-24	1.165e-22	ENSMUSG00000060985	0.936499	1.98286	126.138	2.86771e-29	1.24031e-27	ENSMUSG00000032679	1.24693	4.08445	118.045	1.69538e-27	7.45137e-26	ENSMUSG00000000276	0.919934	5.41158	72.2853	1.86228e-17	7.28705e-16	ENSMUSG00000026536	-3.02847	0.206963	89.8137	2.6168e-21	1.03415e-19	ENSMUSG00000036214	-1.0846	3.16851	120.213	5.68294e-28	2.28251e-26	ENSMUSG00000028979	-4.51565	0.226298	102.782	3.74089e-24	1.52191e-22	ENSMUSG00000007415	1.05219
ENSMUSG00000041453	0.590661	7.52353	107.398	3.6417e-25	1.53715e-23	ENSMUSG00000021814	-0.396395	6.03889	103.397	2.74346e-24	1.17716e-22	ENSMUSG00000028016	-0.977629	3.32346	126.043	3.00944e-29	1.29786e-27	ENSMUSG00000008682	-0.699586	7.48342	117.937	1.79007e-27	7.84491e-26	ENSMUSG00000001418	0.587671	5.27324	72.18	1.96438e-17	7.66448e-16	ENSMUSG00000079426	0.623556	5.55945	89.8135	2.61696e-21	1.03415e-19	ENSMUSG00000036086	1.09053	3.04062	119.894	6.6723e-28	2.67218e-26	ENSMUSG00000002489	-1.50071	3.30655	102.671	3.95715e-24	1.60526e-22	ENSMUSG00000045282	-1.28816
ENSMUSG00000028174	-3.2509	0.256333	107.064	4.3095e-25	1.81382e-23	ENSMUSG00000042541	0.477285	5.46553	102.841	3.63232e-24	1.55409e-22	ENSMUSG00000038976	-0.46264	9.33094	125.685	3.60297e-29	1.54938e-27	ENSMUSG00000092210	-2.59472	-0.58775	117.813	1.90577e-27	8.32805e-26	ENSMUSG00000033059	-0.805522	9.08809	72.1176	2.02749e-17	7.88804e-16	ENSMUSG00000085272	-2.5553	7.36866	89.7698	2.67547e-21	1.05424e-19	ENSMUSG00000024558	-3.39587	2.62903	119.775	7.08498e-28	2.82932e-26	ENSMUSG00000064090	1.02402	2.94431	102.57	4.16314e-24	1.68398e-22	ENSMUSG00000022895	0.587297
ENSMUSG00000074582	-0.31179	6.93219	106.881	4.72816e-25	1.98434e-23	ENSMUSG00000061411	-0.494015	5.69446	102.557	4.19063e-24	1.78784e-22	ENSMUSG00000070471	-4.14095	0.574421	125.633	3.69864e-29	1.58598e-27	ENSMUSG00000028452	0.426762	7.74128	117.478	2.25582e-27	9.82957e-26	ENSMUSG00000050896	-2.36616	-0.274988	72.0861	2.06009e-17	7.99197e-16	ENSMUSG00000020733	-1.92451	3.9889	89.7418	2.71356e-21	1.0662e-19	ENSMUSG00000060621	3.24579	-1.37496	119.422	8.46455e-28	3.37058e-26	ENSMUSG00000033715	-2.75376	4.08202	102.54	4.22799e-24	1.70533e-22	ENSMUSG00000031311	-0.524219
ENSMUSG00000040843	0.444108	5.48932	106.85	4.80075e-25	2.00907e-23	ENSMUSG00000026574	2.49093	-0.43633	102.469	4.38136e-24	1.86389e-22	ENSMUSG00000057069	1.24321	3.86274	125.161	4.69319e-29	2.00671e-27	ENSMUSG00000041187	0.851508	2.81776	116.872	3.06245e-27	1.33064e-25	ENSMUSG00000050708	-1.97	7.50475	71.6247	2.60272e-17	1.00683e-15	ENSMUSG00000053897	-2.25877	4.43748	89.6771	2.80382e-21	1.09852e-19	ENSMUSG00000045100	1.01665	5.21013	119.416	8.4917e-28	3.37176e-26	ENSMUSG00000028413	-1.06719	7.05582	102.463	4.39428e-24	1.76735e-22	ENSMUSG00000061740	-2.36466
ENSMUSG00000050708	-1.6211	6.14963	106.422	5.96065e-25	2.48739e-23	ENSMUSG00000027840	1.53357	0.810349	102.337	4.68441e-24	1.98715e-22	ENSMUSG00000052914	0.825735	4.86488	125.027	5.02006e-29	2.14037e-27	ENSMUSG00000031575	0.379223	5.7864	116.429	3.82891e-27	1.65894e-25	ENSMUSG00000037940	0.881146	6.42541	71.4984	2.77485e-17	1.07037e-15	ENSMUSG00000031517	-2.11765	5.6023	89.6645	2.82166e-21	1.10237e-19	ENSMUSG00000024846	-2.29383	1.35205	119.035	1.02908e-27	4.07452e-26	ENSMUSG00000054474	1.57904	3.09056	102.453	4.41763e-24	1.77169e-22	ENSMUSG00000011267	-4.4775
ENSMUSG00000050860	1.1872	1.25728	106.168	6.77439e-25	2.81895e-23	ENSMUSG00000072825	-0.398038	8.02633	102.18	5.0689e-24	2.14416e-22	ENSMUSG00000074264	-0.982561	4.89675	124.183	7.68322e-29	3.26656e-27	ENSMUSG00000037706	0.446662	8.21968	116.384	3.91593e-27	1.69184e-25	ENSMUSG00000028710	0.942408	6.35213	71.3744	2.95476e-17	1.13654e-15	ENSMUSG00000045594	-0.693197	3.95253	89.6427	2.85299e-21	1.11145e-19	ENSMUSG00000039908	0.903403	2.73971	118.66	1.2431e-27	4.90794e-26	ENSMUSG00000029311	-0.803169	4.70863	102.335	4.68896e-24	1.87518e-22	ENSMUSG00000006589	1.1041
ENSMUSG00000038425	0.785179	3.30545	106.056	7.16768e-25	2.97418e-23	ENSMUSG00000039809	-0.530974	8.12844	101.838	6.02381e-24	2.54089e-22	ENSMUSG00000024857	-6.64889	-0.606847	124.168	7.73972e-29	3.28129e-27	ENSMUSG00000021619	0.732541	2.97045	116.261	4.16715e-27	1.79529e-25	ENSMUSG00000030823	-1.40491	0.897247	71.3366	3.01201e-17	1.15529e-15	ENSMUSG00000031377	-1.97496	3.2319	89.5272	3.02456e-21	1.17496e-19	ENSMUSG00000089736	-2.16697	0.377048	118.462	1.37329e-27	5.40666e-26	ENSMUSG00000066829	-1.35327	3.16123	101.849	5.99313e-24	2.38997e-22	ENSMUSG00000031537	-0.635068
ENSMUSG00000050248	-1.0884	3.78325	105.978	7.45679e-25	3.08543e-23	ENSMUSG00000025429	-1.26711	2.9744	101.784	6.19263e-24	2.60474e-22	ENSMUSG00000045657	-1.34381	1.86337	123.631	1.01466e-28	4.28957e-27	ENSMUSG00000007589	0.732891	4.36673	116.175	4.35167e-27	1.86929e-25	ENSMUSG00000040146	-1.38817	3.08242	71.2803	3.0991e-17	1.18534e-15	ENSMUSG00000068686	2.02097	1.89799	89.2983	3.39551e-21	1.31535e-19	ENSMUSG00000026011	-6.60051	2.33601	118.453	1.37972e-27	5.41668e-26	ENSMUSG00000020088	-0.477021	7.22417	101.632	6.68664e-24	2.65902e-22	ENSMUSG00000029771	1.56307
ENSMUSG00000027374	0.401262	5.87092	105.902	7.74792e-25	3.19689e-23	ENSMUSG00000026895	0.454585	6.24483	101.474	7.23961e-24	3.03657e-22	ENSMUSG00000026988	-1.10001	3.24465	123.432	1.12142e-28	4.72761e-27	ENSMUSG00000021891	0.585993	4.57484	116.17	4.36342e-27	1.86929e-25	ENSMUSG00000032815	-1.46879	1.0302	71.2364	3.16884e-17	1.20861e-15	ENSMUSG00000068452	-2.26472	1.60819	89.2876	3.41391e-21	1.31703e-19	ENSMUSG00000027942	-1.61597	3.03936	118.411	1.40922e-27	5.51693e-26	ENSMUSG00000015745	-0.950819	5.0683	101.497	7.15717e-24	2.83814e-22	ENSMUSG00000020448	-0.663676
ENSMUSG00000029712	0.545953	6.2328	105.886	7.812e-25	3.2143e-23	ENSMUSG00000049047	0.384053	6.03737	101.232	8.18343e-24	3.42283e-22	ENSMUSG00000038252	-0.78751	4.31913	123.182	1.27258e-28	5.34984e-27	ENSMUSG00000022601	0.562192	6.43324	115.856	5.1119e-27	2.1838e-25	ENSMUSG00000038463	-1.66334	4.67883	71.1052	3.38673e-17	1.2881e-15	ENSMUSG00000021519	0.884627	4.83112	89.2847	3.41899e-21	1.31703e-19	ENSMUSG00000040430	0.651541	7.1468	118.182	1.58212e-27	6.17647e-26	ENSMUSG00000035852	-3.6639	0.506648	101.125	8.63657e-24	3.4152e-22	ENSMUSG00000050854	1.43904
ENSMUSG00000019232	1.18245	5.40952	105.487	9.55379e-25	3.91999e-23	ENSMUSG00000020890	-1.48564	1.97567	101.11	8.70023e-24	3.62882e-22	ENSMUSG00000044037	1.0814	4.71636	122.975	1.41205e-28	5.91956e-27	ENSMUSG00000026816	0.649645	5.03257	115.809	5.23435e-27	2.22986e-25	ENSMUSG00000031996	0.818141	9.08826	71.0273	3.52319e-17	1.33625e-15	ENSMUSG00000026343	-2.33104	1.06402	89.1282	3.70035e-21	1.42143e-19	ENSMUSG00000022247	-1.11206	4.39446	117.713	2.00422e-27	7.80246e-26	ENSMUSG00000031201	0.579307	4.83672	100.949	9.43652e-24	3.7211e-22	ENSMUSG00000025221	2.02522
ENSMUSG00000043467	-0.644952	5.80417	105.267	1.06721e-24	4.36664e-23	ENSMUSG00000018666	0.510064	5.95445	100.93	9.52993e-24	3.96381e-22	ENSMUSG00000026816	0.604432	4.96717	122.803	1.53982e-28	6.43722e-27	ENSMUSG00000023960	-0.365125	8.26194	115.296	6.7776e-27	2.87925e-25	ENSMUSG00000054477	-1.05401	3.47032	70.8916	3.7741e-17	1.42743e-15	ENSMUSG00000026778	-1.94596	2.60725	88.9762	3.99581e-21	1.53065e-19	ENSMUSG00000078931	-3.67455	-0.521799	117.543	2.18347e-27	8.47663e-26	ENSMUSG00000025586	-1.50991	3.76603	100.571	1.14253e-23	4.4928e-22	ENSMUSG00000000759	-0.989582
ENSMUSG00000024082	0.458653	4.86747	105.154	1.12977e-24	4.60978e-23	ENSMUSG00000015533	2.12612	0.540555	100.59	1.13144e-23	4.69297e-22	ENSMUSG00000020485	-0.608054	4.50913	122.702	1.62089e-28	6.75729e-27	ENSMUSG00000057176	1.07251	2.5868	115.157	7.26942e-27	3.07961e-25	ENSMUSG00000006732	-1.173	2.82399	70.8677	3.82008e-17	1.44081e-15	ENSMUSG00000014329	-1.15786	5.9809	88.9623	4.02419e-21	1.53724e-19	ENSMUSG00000028621	-2.77364	3.75473	117.446	2.29235e-27	8.87458e-26	ENSMUSG00000054302	0.56102	5.45914	100.418	1.23432e-23	4.84023e-22	ENSMUSG00000062382	-5.0662
ENSMUSG00000038866	-0.480558	5.172	105.13	1.14354e-24	4.65305e-23	ENSMUSG00000028093	-0.755418	3.79254	100.328	1.29142e-23	5.34169e-22	ENSMUSG00000023755	0.691027	3.133	122.21	2.07634e-28	8.63207e-27	ENSMUSG00000025176	1.90555	1.38311	114.875	8.38143e-27	3.54086e-25	ENSMUSG00000022048	1.15421	5.56269	70.7713	4.01132e-17	1.50875e-15	ENSMUSG00000097993	-2.83333	1.03294	88.9266	4.09735e-21	1.56085e-19	ENSMUSG00000024777	1.11396	5.76115	117.388	2.36025e-27	9.11214e-26	ENSMUSG00000021559	-1.62591	5.51553	100.243	1.34831e-23	5.27259e-22	ENSMUSG00000053559	0.929552
ENSMUSG00000034152	-0.547118	6.75886	104.836	1.327e-24	5.38462e-23	ENSMUSG00000031691	0.371569	7.9452	99.9306	1.57835e-23	6.51046e-22	ENSMUSG00000051251	3.1178	0.229818	122.204	2.08304e-28	8.63599e-27	ENSMUSG00000018800	0.405013	6.6662	114.822	8.60855e-27	3.62677e-25	ENSMUSG00000038370	0.989335	7.40304	70.7308	4.09449e-17	1.53577e-15	ENSMUSG00000049439	-1.06255	3.73071	88.6583	4.69265e-21	1.78269e-19	ENSMUSG00000075376	0.728399	5.78143	117.088	2.74623e-27	1.0573e-25	ENSMUSG00000024869	-2.93936	1.93614	99.4933	1.96826e-23	7.67565e-22	ENSMUSG00000037490	1.03758
ENSMUSG00000002475	0.476606	6.36132	104.817	1.33944e-24	5.42012e-23	ENSMUSG00000038213	-0.864824	2.57676	99.8835	1.61626e-23	6.6485e-22	ENSMUSG00000079435	0.488673	6.20633	122.095	2.20034e-28	9.09715e-27	ENSMUSG00000053216	-3.38113	-0.771156	114.735	8.99354e-27	3.77853e-25	ENSMUSG00000006800	-0.87082	6.06254	70.638	4.29176e-17	1.60533e-15	ENSMUSG00000036192	3.14607	0.0784353	88.5852	4.86908e-21	1.84462e-19	ENSMUSG00000063856	-1.22239	5.76716	116.534	3.63023e-27	1.39379e-25	ENSMUSG00000079105	2.71532	4.29597	99.4404	2.02152e-23	7.86166e-22	ENSMUSG00000058921	-0.999093
ENSMUSG00000038126	-0.568627	5.5391	104.303	1.73654e-24	7.00771e-23	ENSMUSG00000021290	0.633711	5.93873	99.5495	1.91317e-23	7.84822e-22	ENSMUSG00000037921	1.91864	1.49283	121.469	3.01665e-28	1.24379e-26	ENSMUSG00000038252	-0.726203	4.32093	114.137	1.21586e-26	5.09425e-25	ENSMUSG00000060798	-1.04344	5.05701	70.5443	4.50048e-17	1.67878e-15	ENSMUSG00000019539	-1.51418	5.22927	88.5657	4.9175e-21	1.85784e-19	ENSMUSG00000017929	-1.23645	3.43617	116.396	3.89261e-27	1.49042e-25	ENSMUSG00000053192	1.66841	3.46075	99.1689	2.31865e-23	8.99242e-22	ENSMUSG00000085957	3.66285
ENSMUSG00000068417	2.61473	-0.402313	104.121	1.90372e-24	7.66131e-23	ENSMUSG00000066551	0.402598	6.67804	99.2436	2.23272e-23	9.13396e-22	ENSMUSG00000024829	0.540928	4.47116	121.235	3.39492e-28	1.39592e-26	ENSMUSG00000038023	-0.499902	6.303	114.064	1.26157e-26	5.27129e-25	ENSMUSG00000028795	1.09186	2.75019	70.5109	4.5774e-17	1.70279e-15	ENSMUSG00000063011	-2.37063	5.7508	88.4894	5.11077e-21	1.92557e-19	ENSMUSG00000078789	1.1851	3.5756	116.298	4.08947e-27	1.56151e-25	ENSMUSG00000049357	1.89201	0.238993	99.0706	2.43662e-23	9.42404e-22	ENSMUSG00000022445	-2.71647
ENSMUSG00000034282	-1.81867	1.19174	104	2.02271e-24	8.11791e-23	ENSMUSG00000029059	0.507009	5.43182	99.1793	2.30646e-23	9.40987e-22	ENSMUSG00000029191	0.434272	5.73987	120.987	3.84633e-28	1.57721e-26	ENSMUSG00000026803	0.46433	4.45875	114.001	1.30228e-26	5.42651e-25	ENSMUSG00000029462	0.49531	5.69116	70.3662	4.92558e-17	1.82731e-15	ENSMUSG00000028871	-2.52494	3.43164	88.2624	5.73216e-21	2.15379e-19	ENSMUSG00000038150	1.02895	6.40531	116.082	4.56025e-27	1.73651e-25	ENSMUSG00000032854	5.17042	1.15803	99.0379	2.4771e-23	9.55444e-22	ENSMUSG00000039704	-0.985617
ENSMUSG00000032330	0.489534	7.42843	103.913	2.11407e-24	8.46145e-23	ENSMUSG00000042682	0.406652	6.41648	99.171	2.31608e-23	9.42337e-22	ENSMUSG00000001520	-0.981853	3.61844	120.93	3.95758e-28	1.6184e-26	ENSMUSG00000021276	-0.55363	5.17321	113.965	1.32611e-26	5.51076e-25	ENSMUSG00000035681	-2.82158	0.318586	70.0494	5.78367e-17	2.1398e-15	ENSMUSG00000029486	0.961778	5.52434	88.1293	6.1312e-21	2.29744e-19	ENSMUSG00000027078	-3.59498	6.12267	115.767	5.34504e-27	2.0298e-25	ENSMUSG00000028191	0.55513	4.6923	98.8681	2.6989e-23	1.03816e-21	ENSMUSG00000032046	0.76132
ENSMUSG00000020061	-1.02198	2.72918	103.741	2.30613e-24	9.20511e-23	ENSMUSG00000008845	1.93541	1.18883	99.1544	2.33568e-23	9.47729e-22	ENSMUSG00000005534	-0.785003	6.07934	120.876	4.0673e-28	1.65875e-26	ENSMUSG00000037139	-2.3398	0.535203	113.825	1.42347e-26	5.89926e-25	ENSMUSG00000029426	0.546789	7.51594	70.0379	5.81758e-17	2.1465e-15	ENSMUSG00000020848	-2.7009	-0.0158928	87.9661	6.65866e-21	2.4866e-19	ENSMUSG00000046186	1.67414	2.2845	115.062	7.62835e-27	2.88903e-25	ENSMUSG00000042647	1.34626	6.85176	98.653	3.00859e-23	1.15414e-21	ENSMUSG00000015090	1.58045
ENSMUSG00000028910	-0.598302	3.69071	103.409	2.72613e-24	1.08521e-22	ENSMUSG00000031918	0.493723	6.02793	99.093	2.40912e-23	9.74879e-22	ENSMUSG00000046169	0.728325	3.02566	120.833	4.15661e-28	1.69058e-26	ENSMUSG00000066595	0.570461	4.87629	113.77	1.4636e-26	6.04914e-25	ENSMUSG00000034211	-0.847675	5.24105	70.0248	5.85627e-17	2.15492e-15	ENSMUSG00000045625	-2.04055	0.762187	87.9538	6.69996e-21	2.4866e-19	ENSMUSG00000026281	0.752552	4.15378	115.051	7.67082e-27	2.89724e-25	ENSMUSG00000074802	1.81564	2.51199	98.1015	3.9747e-23	1.52062e-21	ENSMUSG00000026688	1.81093
ENSMUSG00000030982	-0.392681	6.01861	102.973	3.39682e-24	1.34854e-22	ENSMUSG00000027447	0.658291	9.72429	98.936	2.60791e-23	1.05247e-21	ENSMUSG00000037710	0.42358	5.98828	120.317	5.3923e-28	2.18723e-26	ENSMUSG00000021054	0.39272	5.81863	113.679	1.53236e-26	6.31621e-25	ENSMUSG00000113450	1.3404	1.01285	69.9836	5.97992e-17	2.19447e-15	ENSMUSG00000033578	-1.64529	1.90919	87.9527	6.70369e-21	2.4866e-19	ENSMUSG00000031824	-1.27553	4.54013	114.954	8.05635e-27	3.03463e-25	ENSMUSG00000003484	-4.68194	1.68367	97.8326	4.55298e-23	1.73715e-21	ENSMUSG00000031864	-0.756549
ENSMUSG00000036990	-0.457224	6.43119	102.944	3.44829e-24	1.36528e-22	ENSMUSG00000050751	-0.604849	6.96225	98.7688	2.83765e-23	1.1421e-21	ENSMUSG00000078932	3.39679	0.534418	120.258	5.55456e-28	2.24698e-26	ENSMUSG00000061518	-0.972075	7.00306	113.536	1.64703e-26	6.77057e-25	ENSMUSG00000043398	-2.23209	-0.643365	69.5873	7.31061e-17	2.67557e-15	ENSMUSG00000061665	-0.727509	5.71196	87.9514	6.70833e-21	2.4866e-19	ENSMUSG00000039782	0.931939	6.01827	114.688	9.21078e-27	3.46013e-25	ENSMUSG00000090799	1.24602	5.57312	97.7183	4.82334e-23	1.83534e-21	ENSMUSG00000019897	-0.952841
ENSMUSG00000024109	-0.520989	8.63261	102.855	3.60676e-24	1.42419e-22	ENSMUSG00000032572	2.77684	1.98902	98.6783	2.97035e-23	1.19229e-21	ENSMUSG00000023571	-1.73862	2.57068	120.205	5.70445e-28	2.30141e-26	ENSMUSG00000016024	-2.49797	2.43723	113.446	1.72327e-26	7.06493e-25	ENSMUSG00000033965	-0.999359	4.14491	69.5143	7.58628e-17	2.76442e-15	ENSMUSG00000000308	-2.39384	2.44435	87.5985	8.01868e-21	2.96432e-19	ENSMUSG00000009927	-0.795228	7.80261	114.582	9.71584e-27	3.64005e-25	ENSMUSG00000021400	0.71889	5.19067	97.3183	5.90326e-23	2.24022e-21	ENSMUSG00000001123	-1.16602
ENSMUSG00000028011	-2.31398	0.0890412	102.708	3.88313e-24	1.5292e-22	ENSMUSG00000054091	0.788074	5.66399	98.662	2.99498e-23	1.19896e-21	ENSMUSG00000026915	-0.531539	7.92424	120.134	5.91247e-28	2.37463e-26	ENSMUSG00000053675	6.7641	3.90718	113.296	1.85834e-26	7.59828e-25	ENSMUSG00000033427	2.44467	-0.215244	69.5123	7.59411e-17	2.76442e-15	ENSMUSG00000049303	2.06152	2.17424	87.4758	8.53187e-21	3.14558e-19	ENSMUSG00000068039	-0.677869	7.27633	114.525	9.99989e-27	3.73642e-25	ENSMUSG00000024513	0.49808	6.21556	97.1402	6.45894e-23	2.44453e-21	ENSMUSG00000021482	-0.735347
ENSMUSG00000027425	-0.471018	4.89491	102.479	4.3588e-24	1.71194e-22	ENSMUSG00000010607	0.784881	3.96347	98.4088	3.40336e-23	1.3588e-21	ENSMUSG00000029090	-0.575078	4.32025	120.132	5.91758e-28	2.37463e-26	ENSMUSG00000039826	0.527101	5.49741	113.137	2.01378e-26	8.21181e-25	ENSMUSG00000028788	0.566424	8.32506	69.363	8.19091e-17	2.9737e-15	ENSMUSG00000027560	-3.10438	0.372702	87.415	8.79785e-21	3.23498e-19	ENSMUSG00000066000	-9.96197	1.64659	114.447	1.04e-26	3.87554e-25	ENSMUSG00000032263	0.838513	5.88388	96.9478	7.11811e-23	2.6868e-21	ENSMUSG00000074826	4.08638
ENSMUSG00000020695	1.03435	4.1736	102.322	4.71804e-24	1.84809e-22	ENSMUSG00000023018	-0.560603	6.91166	98.3671	3.47593e-23	1.38407e-21	ENSMUSG00000044339	1.30662	2.57621	120.047	6.17921e-28	2.473e-26	ENSMUSG00000048602	-2.54935	0.879197	112.717	2.48938e-26	1.01241e-24	ENSMUSG00000032121	0.75836	3.75727	69.3264	8.34459e-17	3.02141e-15	ENSMUSG00000032245	0.785858	4.48159	87.0793	1.04257e-20	3.82331e-19	ENSMUSG00000029729	0.69739	5.05004	114.116	1.22916e-26	4.56823e-25	ENSMUSG00000034621	0.642537	5.99099	96.9359	7.16082e-23	2.69571e-21	ENSMUSG00000024781	0.99798
ENSMUSG00000042345	4.74677	0.615081	102.258	4.87356e-24	1.90393e-22	ENSMUSG00000010277	-0.340972	8.41025	98.3358	3.53123e-23	1.40235e-21	ENSMUSG00000078931	-3.09257	-0.753679	119.864	6.77433e-28	2.70396e-26	ENSMUSG00000043929	0.611502	4.57539	112.686	2.52755e-26	1.02521e-24	ENSMUSG00000018040	-0.53357	4.60403	69.1958	8.91564e-17	3.21959e-15	ENSMUSG00000020577	0.857823	5.95419	87.0026	1.08381e-20	3.96396e-19	ENSMUSG00000086040	0.951301	6.00849	113.819	1.42781e-26	5.2924e-25	ENSMUSG00000094441	-0.993864	3.84769	96.8831	7.3544e-23	2.76122e-21	ENSMUSG00000032186	1.79062
ENSMUSG00000079469	-0.724236	4.10824	102.188	5.04878e-24	1.96715e-22	ENSMUSG00000028689	1.93559	2.97864	98.2473	3.69265e-23	1.46256e-21	ENSMUSG00000064373	0.751138	8.18465	119.824	6.91412e-28	2.75245e-26	ENSMUSG00000040621	-1.56669	2.40923	112.489	2.79236e-26	1.12961e-24	ENSMUSG00000030706	0.635456	5.68445	69.101	9.35462e-17	3.36915e-15	ENSMUSG00000113902	0.623742	7.79817	86.8502	1.17059e-20	4.27003e-19	ENSMUSG00000032377	1.02401	4.84062	113.633	1.56794e-26	5.79639e-25	ENSMUSG00000026479	1.39843	4.41317	96.8695	7.40491e-23	2.77281e-21	ENSMUSG00000022025	3.8543
ENSMUSG00000028970	-1.98489	0.00668521	102.152	5.14218e-24	1.99824e-22	ENSMUSG00000037935	0.379009	5.92779	98.1631	3.85304e-23	1.52205e-21	ENSMUSG00000073975	-6.3226	-1.5239	119.807	6.97221e-28	2.76823e-26	ENSMUSG00000045827	-0.870075	3.3391	112.287	3.09194e-26	1.24749e-24	ENSMUSG00000006191	0.72057	4.67082	68.9525	1.00865e-16	3.62313e-15	ENSMUSG00000018822	-3.90377	2.22316	86.8216	1.18765e-20	4.3208e-19	ENSMUSG00000005803	-1.11855	5.08951	113.592	1.60108e-26	5.90325e-25	ENSMUSG00000044724	3.00229	-0.815159	96.7568	7.8388e-23	2.92752e-21	ENSMUSG00000039191	0.819059
ENSMUSG00000029388	0.442687	4.54837	102.067	5.3669e-24	2.08006e-22	ENSMUSG00000015852	-1.85581	3.52526	98.151	3.87661e-23	1.52732e-21	ENSMUSG00000089665	-2.05241	1.49335	119.152	9.70138e-28	3.84164e-26	ENSMUSG00000040848	-1.21201	5.14576	111.811	3.93017e-26	1.5815e-24	ENSMUSG00000000120	-1.95768	1.00417	68.7972	1.09129e-16	3.90964e-15	ENSMUSG00000041482	-2.2021	1.94235	86.8026	1.19909e-20	4.35091e-19	ENSMUSG00000031985	-0.765151	7.90663	113.084	2.06777e-26	7.60384e-25	ENSMUSG00000040841	-0.846461	3.90367	96.7493	7.86862e-23	2.93091e-21	ENSMUSG00000075267	3.15991
ENSMUSG00000030088	-0.52427	5.71468	102.027	5.4767e-24	2.11703e-22	ENSMUSG00000044313	2.92433	-0.221851	98.1198	3.93813e-23	1.54748e-21	ENSMUSG00000014778	1.3309	2.90642	118.954	1.07186e-27	4.23328e-26	ENSMUSG00000034255	-0.685799	3.90418	111.727	4.10163e-26	1.64616e-24	ENSMUSG00000001555	-0.971633	3.4522	68.5825	1.2168e-16	4.3478e-15	ENSMUSG00000030177	-1.27642	2.73569	86.72	1.25023e-20	4.52452e-19	ENSMUSG00000035934	0.884332	3.98672	112.592	2.65017e-26	9.71985e-25	ENSMUSG00000021552	0.788388	4.79918	96.5592	8.66136e-23	3.21769e-21	ENSMUSG00000049404	1.68967
ENSMUSG00000030834	1.92889	2.09836	101.95	5.69336e-24	2.19501e-22	ENSMUSG00000037347	1.08124	1.74319	98.024	4.13333e-23	1.61602e-21	ENSMUSG00000039826	0.572926	5.4921	118.843	1.13346e-27	4.46483e-26	ENSMUSG00000027490	-1.30257	2.66361	111.562	4.45637e-26	1.78383e-24	ENSMUSG00000096795	2.75186	-0.666744	68.5489	1.2377e-16	4.41089e-15	ENSMUSG00000024902	0.554769	5.42855	86.6661	1.2848e-20	4.63742e-19	ENSMUSG00000074736	2.71626	-0.394358	112.39	2.93475e-26	1.07353e-24	ENSMUSG00000001767	0.515846	4.9143	96.4464	9.16945e-23	3.39751e-21	ENSMUSG00000089678	-1.13091
ENSMUSG00000051007	0.622842	5.03263	101.941	5.71916e-24	2.19918e-22	ENSMUSG00000037646	-0.422742	6.84518	98.0236	4.13422e-23	1.61602e-21	ENSMUSG00000053675	5.83702	3.34478	118.52	1.33392e-27	5.24071e-26	ENSMUSG00000025326	-0.439499	7.48819	111.538	4.50999e-26	1.80057e-24	ENSMUSG00000021684	1.40433	1.99476	68.5177	1.25741e-16	4.4694e-15	ENSMUSG00000035041	3.94345	-0.166175	86.3913	1.4763e-20	5.31467e-19	ENSMUSG00000001150	0.676809	5.52636	112.303	3.06665e-26	1.11884e-24	ENSMUSG00000037022	-0.94518	5.1622	96.4225	9.28086e-23	3.42979e-21	ENSMUSG00000096852	4.34478
ENSMUSG00000052609	0.566153	4.80349	101.529	7.04263e-24	2.70103e-22	ENSMUSG00000034880	0.671062	3.68679	97.9935	4.19759e-23	1.63651e-21	ENSMUSG00000038298	2.80056	-0.987653	118.32	1.47585e-27	5.78318e-26	ENSMUSG00000002100	-2.85232	4.44167	111.529	4.53059e-26	1.80407e-24	ENSMUSG00000014551	0.662703	5.79614	68.5091	1.26291e-16	4.47722e-15	ENSMUSG00000074793	1.18845	5.75006	86.2684	1.57101e-20	5.64087e-19	ENSMUSG00000005968	-1.92602	1.76467	112.229	3.18356e-26	1.15847e-24	ENSMUSG00000027605	0.94681	5.72709	96.4013	9.38047e-23	3.45755e-21	ENSMUSG00000027236	0.959728
ENSMUSG00000004939	2.52895	-0.30668	101.518	7.08181e-24	2.70898e-22	ENSMUSG00000021279	-0.335503	7.49366	97.906	4.38712e-23	1.70595e-21	ENSMUSG00000027327	-0.664276	4.89871	118.254	1.52551e-27	5.9622e-26	ENSMUSG00000034889	0.495995	4.96331	111.458	4.69663e-26	1.86532e-24	ENSMUSG00000038173	-1.61847	3.17998	68.4253	1.31776e-16	4.65952e-15	ENSMUSG00000025429	0.768952	4.81944	86.2589	1.57852e-20	5.65307e-19	ENSMUSG00000002221	0.58913	4.59563	112.148	3.3155e-26	1.20334e-24	ENSMUSG00000041216	3.32483	3.08319	96.3641	9.5585e-23	3.51399e-21	ENSMUSG00000038895	-1.18789
ENSMUSG00000022704	0.814526	4.78543	101.493	7.17038e-24	2.73573e-22	ENSMUSG00000018040	-0.474127	5.90653	97.6892	4.89485e-23	1.89844e-21	ENSMUSG00000056665	0.459226	5.29869	117.883	1.83884e-27	7.16815e-26	ENSMUSG00000038880	0.699646	4.97855	111.161	5.45659e-26	2.16152e-24	ENSMUSG00000036473	0.86325	4.97185	68.3006	1.40376e-16	4.95071e-15	ENSMUSG00000057762	2.26679	-0.389159	86.2352	1.59757e-20	5.70643e-19	ENSMUSG00000038256	0.673333	5.25415	112.048	3.4868e-26	1.26222e-24	ENSMUSG00000033021	-0.84957	5.0539	96.2343	1.0206e-22	3.74228e-21	ENSMUSG00000037440	2.15321
ENSMUSG00000067369	-0.634263	4.64848	101.249	8.11357e-24	3.08757e-22	ENSMUSG00000002017	0.48257	5.91911	97.2948	5.97361e-23	2.31083e-21	ENSMUSG00000055884	-0.890176	4.64959	117.767	1.95049e-27	7.58365e-26	ENSMUSG00000015869	0.480524	5.58537	110.905	6.20836e-26	2.45294e-24	ENSMUSG00000035165	2.2222	0.0771766	68.2538	1.43747e-16	5.05646e-15	ENSMUSG00000028898	-0.774316	4.22164	86.1882	1.63603e-20	5.82867e-19	ENSMUSG00000018868	-4.50631	-1.18067	111.826	3.90064e-26	1.40837e-24	ENSMUSG00000030158	5.93214	2.04588	96.1194	1.08159e-22	3.95566e-21	ENSMUSG00000064367	1.90079
ENSMUSG00000021932	0.911579	3.07141	100.987	9.261e-24	3.51511e-22	ENSMUSG00000008668	0.622484	6.45059	97.228	6.17868e-23	2.38398e-21	ENSMUSG00000021483	0.630847	4.00329	117.587	2.13516e-27	8.28024e-26	ENSMUSG00000046008	-7.09892	0.689077	110.839	6.41667e-26	2.5287e-24	ENSMUSG00000020326	-0.659677	9.69406	68.1529	1.51298e-16	5.30835e-15	ENSMUSG00000029086	2.24465	3.6855	86.1244	1.68961e-20	6.00403e-19	ENSMUSG00000020447	2.03503	0.876647	111.736	4.08121e-26	1.46976e-24	ENSMUSG00000027245	1.14114	2.19767	95.9499	1.17828e-22	4.29814e-21	ENSMUSG00000071748	2.32093
ENSMUSG00000000759	-0.504383	5.51441	100.866	9.84069e-24	3.72551e-22	ENSMUSG00000040969	-2.98185	-1.31824	97.1601	6.39433e-23	2.45869e-21	ENSMUSG00000028675	0.637061	5.65087	117.09	2.74276e-27	1.06091e-25	ENSMUSG00000071531	0.990086	3.81119	110.772	6.63862e-26	2.60942e-24	ENSMUSG00000020340	-3.61122	5.52833	67.9329	1.69153e-16	5.91947e-15	ENSMUSG00000005640	3.45301	-0.22076	85.9375	1.85715e-20	6.58237e-19	ENSMUSG00000026798	0.930623	4.32578	111.638	4.28897e-26	1.5406e-24	ENSMUSG00000021228	3.92409	1.43111	95.925	1.19317e-22	4.34124e-21	ENSMUSG00000051169	-1.26353
ENSMUSG00000028514	-0.321903	7.18673	100.809	1.01276e-23	3.82429e-22	ENSMUSG00000052565	3.07764	-0.00045426	97.1567	6.40524e-23	2.45869e-21	ENSMUSG00000036446	-2.23905	2.19426	116.843	3.10753e-27	1.19892e-25	ENSMUSG00000029524	0.825701	4.3715	110.543	7.45125e-26	2.92131e-24	ENSMUSG00000029474	-0.483359	4.93069	67.9238	1.69936e-16	5.93159e-15	ENSMUSG00000048652	2.75411	1.14682	85.8099	1.98094e-20	7.00307e-19	ENSMUSG00000074754	-1.18157	4.21385	111.2	5.34905e-26	1.91645e-24	ENSMUSG00000039178	0.72922	4.1452	95.8991	1.2089e-22	4.38717e-21	ENSMUSG00000060126	0.878603
ENSMUSG00000011263	1.94348	0.194962	100.492	1.18887e-23	4.47778e-22	ENSMUSG00000036309	0.395894	8.40727	97.0643	6.7113e-23	2.56957e-21	ENSMUSG00000038451	1.14467	2.42444	116.659	3.40903e-27	1.31187e-25	ENSMUSG00000020912	-3.52712	1.14368	110.417	7.94133e-26	3.10547e-24	ENSMUSG00000070583	1.67556	3.9767	67.6513	1.95128e-16	6.79345e-15	ENSMUSG00000069516	-2.09554	7.55556	85.7171	2.07615e-20	7.32082e-19	ENSMUSG00000026586	0.90055	6.25544	110.979	5.98133e-26	2.13748e-24	ENSMUSG00000019936	-4.85767	1.08382	95.8915	1.21356e-22	4.39279e-21	ENSMUSG00000034620	0.734181
ENSMUSG00000115338	-0.894782	2.45588	100.243	1.34826e-23	5.06511e-22	ENSMUSG00000028998	0.470716	5.5165	96.9791	7.00626e-23	2.67564e-21	ENSMUSG00000027071	-2.37259	0.634448	116.607	3.4994e-27	1.3432e-25	ENSMUSG00000033170	-1.04061	3.49137	110.207	8.82748e-26	3.44317e-24	ENSMUSG00000054408	0.645737	6.68611	67.6141	1.98842e-16	6.90505e-15	ENSMUSG00000045284	1.16185	2.47427	85.5467	2.26289e-20	7.95887e-19	ENSMUSG00000023153	3.17725	3.02347	110.961	6.03505e-26	2.15117e-24	ENSMUSG00000008682	-0.908045	8.42999	95.6497	1.37124e-22	4.95083e-21	ENSMUSG00000020280	0.696976
ENSMUSG00000028093	-0.819885	3.86513	100.046	1.48861e-23	5.57811e-22	ENSMUSG00000034681	0.8329	6.08882	96.8465	7.49169e-23	2.85372e-21	ENSMUSG00000032679	1.13798	4.04177	116.396	3.8919e-27	1.49004e-25	ENSMUSG00000072974	-1.8867	0.324149	109.786	1.09151e-25	4.24659e-24	ENSMUSG00000044556	2.70157	0.422722	67.5764	2.02676e-16	7.02025e-15	ENSMUSG00000001583	-2.36212	0.813727	85.3876	2.45249e-20	8.60374e-19	ENSMUSG00000032625	1.94113	4.99264	110.811	6.50851e-26	2.31401e-24	ENSMUSG00000031824	-1.29171	4.70808	95.586	1.41604e-22	5.09955e-21	ENSMUSG00000028048	0.83063
ENSMUSG00000064354	-1.0449	2.8412	99.8798	1.61935e-23	6.05258e-22	ENSMUSG00000031712	1.79029	0.515906	96.7235	7.97189e-23	3.02891e-21	ENSMUSG00000031320	0.39563	7.53347	116.231	4.23027e-27	1.61547e-25	ENSMUSG00000022668	-0.570816	4.91093	109.481	1.27309e-25	4.94044e-24	ENSMUSG00000029352	-1.80156	-0.087616	67.4489	2.16224e-16	7.47045e-15	ENSMUSG00000033417	0.591317	5.50959	85.2817	2.58741e-20	9.05396e-19	ENSMUSG00000021033	-1.13329	5.05125	110.725	6.79596e-26	2.41006e-24	ENSMUSG00000024169	0.813498	4.12978	95.4978	1.48057e-22	5.31839e-21	ENSMUSG00000038370	1.47987
ENSMUSG00000005378	0.499861	4.48896	99.8672	1.62968e-23	6.07575e-22	ENSMUSG00000025283	0.580312	5.68339	96.7017	8.06002e-23	3.05462e-21	ENSMUSG00000032840	-0.526625	5.54671	116.082	4.55978e-27	1.73688e-25	ENSMUSG00000004707	2.85257	-1.48115	109.382	1.33838e-25	5.1806e-24	ENSMUSG00000040040	0.839013	3.18468	67.232	2.41367e-16	8.31798e-15	ENSMUSG00000028426	0.566481	7.22543	85.1093	2.82326e-20	9.85418e-19	ENSMUSG00000030924	1.30396	1.18393	110.668	6.99522e-26	2.47443e-24	ENSMUSG00000027316	1.70575	2.88362	95.4583	1.51039e-22	5.41172e-21	ENSMUSG00000034342	-0.922505
ENSMUSG00000059588	1.00291	3.33803	99.7367	1.74063e-23	6.47294e-22	ENSMUSG00000043727	2.87526	-0.187075	96.5521	8.6925e-23	3.28599e-21	ENSMUSG00000035754	-0.506646	5.80006	115.817	5.21269e-27	1.98056e-25	ENSMUSG00000118125	-0.974683	2.01607	109.355	1.35687e-25	5.23891e-24	ENSMUSG00000029314	0.756565	4.46992	67.2071	2.44434e-16	8.40234e-15	ENSMUSG00000028383	0.766419	8.37799	85.0493	2.91022e-20	1.0132e-18	ENSMUSG00000003721	0.523083	6.20637	110.652	7.05368e-26	2.48308e-24	ENSMUSG00000039057	6.11056	3.92033	95.4494	1.51718e-22	5.42229e-21	ENSMUSG00000056737	1.06362
ENSMUSG00000020778	-0.639761	3.36566	99.5186	1.94328e-23	7.20831e-22	ENSMUSG00000032526	0.568678	5.2256	96.5353	8.76654e-23	3.30561e-21	ENSMUSG00000031987	-0.384009	6.0444	115.479	6.1816e-27	2.34276e-25	ENSMUSG00000037649	0.831038	3.77526	109.332	1.37232e-25	5.28518e-24	ENSMUSG00000062040	-0.90126	3.68712	67.1621	2.50082e-16	8.57477e-15	ENSMUSG00000053226	0.902724	3.34645	84.9884	3.00123e-20	1.04224e-18	ENSMUSG00000084128	2.253	0.255809	110.651	7.05531e-26	2.48308e-24	ENSMUSG00000074220	1.33162	1.59979	95.3944	1.55996e-22	5.56111e-21	ENSMUSG00000118504	-1.96147
ENSMUSG00000038836	0.94545	4.16702	99.3752	2.08924e-23	7.73017e-22	ENSMUSG00000039191	0.584172	4.63308	96.4662	9.07798e-23	3.41442e-21	ENSMUSG00000022678	-0.755474	4.3004	115.251	6.93476e-27	2.62158e-25	ENSMUSG00000017667	-0.54367	5.28781	108.934	1.67821e-25	6.44696e-24	ENSMUSG00000056260	0.661243	4.42375	67.1175	2.55798e-16	8.74869e-15	ENSMUSG00000031673	-1.61852	5.34536	84.9389	3.07729e-20	1.06597e-18	ENSMUSG00000057880	-3.23484	4.57039	110.359	8.17421e-26	2.86962e-24	ENSMUSG00000003378	-1.34966	3.00227	95.3406	1.60291e-22	5.69983e-21	ENSMUSG00000019927	-0.910789
ENSMUSG00000032018	0.520908	6.38118	99.2829	2.18887e-23	8.07846e-22	ENSMUSG00000003660	-0.354316	7.62556	96.1344	1.07342e-22	4.0272e-21	ENSMUSG00000028100	-1.77435	1.33204	115.191	7.14669e-27	2.69491e-25	ENSMUSG00000045007	-0.944489	4.77464	108.445	2.14676e-25	8.20339e-24	ENSMUSG00000027593	-0.477018	6.26337	66.9357	2.80508e-16	9.56969e-15	ENSMUSG00000021982	0.579794	5.88486	84.6995	3.47331e-20	1.20013e-18	ENSMUSG00000001844	0.742957	4.11355	110.331	8.29288e-26	2.90397e-24	ENSMUSG00000005968	-2.32658	2.43168	95.2431	1.6838e-22	5.97243e-21	ENSMUSG00000040725	0.665486
ENSMUSG00000078442	2.74694	-0.375974	99.2369	2.24037e-23	8.24782e-22	ENSMUSG00000051985	-2.27199	4.46357	95.9392	1.18466e-22	4.43342e-21	ENSMUSG00000033318	1.72861	3.37224	115.025	7.76922e-27	2.92232e-25	ENSMUSG00000006235	1.45749	3.00271	108.442	2.15035e-25	8.20339e-24	ENSMUSG00000036111	-1.71108	0.594137	66.8762	2.89108e-16	9.83837e-15	ENSMUSG00000034810	-0.858212	5.61614	84.6937	3.48364e-20	1.20068e-18	ENSMUSG00000090206	2.77316	-1.25605	110.065	9.48491e-26	3.31306e-24	ENSMUSG00000067242	-3.94295	0.832172	95.1991	1.72166e-22	6.09138e-21	ENSMUSG00000032649	1.55822
ENSMUSG00000038664	-0.354156	8.6807	99.1612	2.32765e-23	8.5477e-22	ENSMUSG00000026676	-1.39825	3.6712	95.7799	1.2839e-22	4.7928e-21	ENSMUSG00000022106	0.496356	4.91576	114.585	9.70067e-27	3.63969e-25	ENSMUSG00000029810	1.17953	5.18796	108.441	2.15157e-25	8.20339e-24	ENSMUSG00000049439	-0.825509	3.41773	66.8482	2.93242e-16	9.95409e-15	ENSMUSG00000039682	0.718691	6.23398	84.5756	3.69803e-20	1.27138e-18	ENSMUSG00000079018	-2.07436	5.50827	109.978	9.90938e-26	3.45268e-24	ENSMUSG00000023118	-0.673759	6.62566	95.1768	1.7412e-22	6.14513e-21	ENSMUSG00000031521	-0.886561
ENSMUSG00000042520	-0.4139	6.78086	99.1162	2.38118e-23	8.72246e-22	ENSMUSG00000038664	-0.355248	8.72328	95.7258	1.31949e-22	4.91337e-21	ENSMUSG00000022388	1.26007	2.15929	114.145	1.2111e-26	4.5327e-25	ENSMUSG00000054302	0.445373	5.91167	108.174	2.46247e-25	9.36536e-24	ENSMUSG00000049670	1.10719	2.157	66.7628	3.06216e-16	1.03686e-14	ENSMUSG00000021684	1.57743	1.91808	84.5566	3.73375e-20	1.28046e-18	ENSMUSG00000044730	0.941338	3.41155	109.968	9.958e-26	3.46096e-24	ENSMUSG00000036528	0.649265	5.57026	95.1638	1.7527e-22	6.17029e-21	ENSMUSG00000114943	-6.3456
ENSMUSG00000022296	-0.417227	7.33932	98.9938	2.53297e-23	9.25544e-22	ENSMUSG00000039765	-0.701986	5.10372	95.6476	1.37264e-22	5.09858e-21	ENSMUSG00000070733	-0.414819	6.67392	114.084	1.24875e-26	4.662e-25	ENSMUSG00000023571	-1.73352	2.5524	107.75	3.04964e-25	1.15697e-23	ENSMUSG00000035125	0.918522	2.37523	66.7226	3.12526e-16	1.05559e-14	ENSMUSG00000047443	-3.90789	0.113756	84.3907	4.06057e-20	1.38908e-18	ENSMUSG00000031376	3.25726	-0.219444	109.891	1.03513e-25	3.58871e-24	ENSMUSG00000015944	1.17683	6.60146	95.1208	1.79111e-22	6.28983e-21	ENSMUSG00000032705	-0.79176
ENSMUSG00000038233	-0.966334	3.43031	98.9496	2.59016e-23	9.4409e-22	ENSMUSG00000022620	0.520563	5.80705	95.3774	1.5734e-22	5.82977e-21	ENSMUSG00000042828	1.79797	1.18999	113.958	1.33125e-26	4.95765e-25	ENSMUSG00000025934	1.47705	1.67518	107.668	3.1772e-25	1.20237e-23	ENSMUSG00000035845	0.858212	3.78366	66.671	3.20815e-16	1.07936e-14	ENSMUSG00000035189	-2.48414	2.78452	84.3469	4.15142e-20	1.41663e-18	ENSMUSG00000029468	-1.14023	2.90037	109.873	1.04468e-25	3.61283e-24	ENSMUSG00000005237	2.67182	0.968028	94.7079	2.20659e-22	7.72963e-21	ENSMUSG00000026553	0.633188
ENSMUSG00000023951	0.650908	6.94327	98.9073	2.64606e-23	9.62077e-22	ENSMUSG00000020857	1.30479	1.07059	95.319	1.62051e-22	5.98947e-21	ENSMUSG00000030056	-0.71465	3.68505	113.754	1.47555e-26	5.48143e-25	ENSMUSG00000047181	-0.489788	5.89816	107.418	3.60543e-25	1.36105e-23	ENSMUSG00000000948	1.53738	3.57125	66.669	3.21154e-16	1.07936e-14	ENSMUSG00000028675	0.603529	6.10798	83.7365	5.65307e-20	1.92428e-18	ENSMUSG00000021840	-0.861317	4.62122	109.853	1.05518e-25	3.6401e-24	ENSMUSG00000031258	2.14143	2.06988	94.6238	2.30228e-22	8.04487e-21	ENSMUSG00000003345	0.744895
ENSMUSG00000020744	-0.547196	5.01281	98.8032	2.78879e-23	1.01147e-21	ENSMUSG00000042700	-0.593402	8.44522	95.3129	1.62552e-22	5.99314e-21	ENSMUSG00000061518	-1.02868	7.05491	113.63	1.57063e-26	5.82026e-25	ENSMUSG00000049555	1.02182	3.57416	107.387	3.66236e-25	1.37913e-23	ENSMUSG00000032528	-1.63744	1.2857	66.5564	3.40028e-16	1.13998e-14	ENSMUSG00000039206	-1.2846	4.02592	83.6675	5.85383e-20	1.9877e-18	ENSMUSG00000062995	-1.37296	3.36319	109.604	1.19681e-25	4.1185e-24	ENSMUSG00000038150	1.00951	6.52156	94.6073	2.32166e-22	8.09255e-21	ENSMUSG00000025588	3.81874
ENSMUSG00000079598	-0.50899	5.15927	98.6546	3.00614e-23	1.08762e-21	ENSMUSG00000005846	0.488998	5.75921	95.2386	1.68769e-22	6.20704e-21	ENSMUSG00000025082	2.43217	-0.89387	113.367	1.79283e-26	6.62729e-25	ENSMUSG00000022231	-0.523175	6.35223	107.209	4.00651e-25	1.50501e-23	ENSMUSG00000061981	-0.483853	6.21389	66.5302	3.44566e-16	1.15179e-14	ENSMUSG00000039976	0.910189	7.53095	83.4403	6.56708e-20	2.2244e-18	ENSMUSG00000098022	2.49246	-1.28736	109.46	1.28678e-25	4.41721e-24	ENSMUSG00000020042	-2.59631	1.88807	94.5272	2.41748e-22	8.40581e-21	ENSMUSG00000025785	-0.949901
ENSMUSG00000039096	0.605569	4.50985	98.4444	3.34284e-23	1.20646e-21	ENSMUSG00000000581	0.5026	5.54946	95.1827	1.73598e-22	6.36894e-21	ENSMUSG00000041733	-0.418683	5.27653	113.307	1.84793e-26	6.81419e-25	ENSMUSG00000042708	-1.60217	1.67045	107.058	4.32377e-25	1.62019e-23	ENSMUSG00000050323	0.738626	3.53859	66.5263	3.4525e-16	1.15179e-14	ENSMUSG00000032068	-2.22952	1.73068	82.9705	8.32874e-20	2.81417e-18	ENSMUSG00000020234	2.48471	-0.263873	109.424	1.31028e-25	4.48681e-24	ENSMUSG00000027366	-0.752991	6.72482	94.3209	2.68302e-22	9.30619e-21	ENSMUSG00000043531	-4.01437
ENSMUSG00000025532	0.501806	4.54115	98.0918	3.99436e-23	1.43807e-21	ENSMUSG00000001383	0.46004	7.39614	95.123	1.78918e-22	6.54807e-21	ENSMUSG00000030972	2.84683	2.37725	112.671	2.54682e-26	9.36831e-25	ENSMUSG00000067081	-2.38486	0.837583	106.907	4.66608e-25	1.74418e-23	ENSMUSG00000031239	-1.0076	3.966	66.5042	3.49156e-16	1.16197e-14	ENSMUSG00000021000	0.581847	6.41982	82.9257	8.51978e-20	2.87167e-18	ENSMUSG00000029836	0.765427	5.39333	109.415	1.31639e-25	4.49669e-24	ENSMUSG00000047246	-2.04605	3.43395	94.2977	2.71467e-22	9.3929e-21	ENSMUSG00000090485	5.37812
ENSMUSG00000050552	0.533527	5.00222	98.0467	4.0863e-23	1.46757e-21	ENSMUSG00000042306	3.03544	-1.08601	95.0627	1.84454e-22	6.73415e-21	ENSMUSG00000053024	-0.517382	7.83578	112.503	2.77189e-26	1.01713e-24	ENSMUSG00000033009	-0.459915	6.8479	106.662	5.27929e-25	1.96857e-23	ENSMUSG00000020457	0.505914	5.69553	66.4625	3.56621e-16	1.18391e-14	ENSMUSG00000028427	1.44311	4.89727	82.8818	8.71076e-20	2.92886e-18	ENSMUSG00000092558	-0.722301	3.86958	109.277	1.41088e-25	4.80769e-24	ENSMUSG00000021703	-1.0143	4.83935	93.9554	3.22712e-22	1.11387e-20	ENSMUSG00000025576	2.6911
ENSMUSG00000035443	-1.04147	4.30204	98.0313	4.11811e-23	1.47539e-21	ENSMUSG00000051054	1.53446	0.83072	94.8499	2.05383e-22	7.47995e-21	ENSMUSG00000033781	-0.61866	5.98098	112.284	3.09557e-26	1.13313e-24	ENSMUSG00000036214	-1.3539	1.40724	106.655	5.29761e-25	1.97058e-23	ENSMUSG00000027408	-1.25279	3.14008	66.4021	3.67703e-16	1.21772e-14	ENSMUSG00000059493	1.74546	1.76242	82.8145	9.01255e-20	3.02294e-18	ENSMUSG00000044986	-1.81109	3.15014	109.263	1.4211e-25	4.8307e-24	ENSMUSG00000007589	0.702191	4.21383	93.9463	3.24201e-22	1.11628e-20	ENSMUSG00000028427	1.56302
ENSMUSG00000000402	-1.47098	1.06314	98.0146	4.15312e-23	1.48431e-21	ENSMUSG00000036872	1.65436	2.16424	94.8245	2.08034e-22	7.55806e-21	ENSMUSG00000037482	-3.85001	-1.33724	112.222	3.19449e-26	1.16649e-24	ENSMUSG00000021703	-0.47801	6.6651	106.538	5.61953e-25	2.08524e-23	ENSMUSG00000025159	0.486337	5.09941	66.0314	4.43806e-16	1.46618e-14	ENSMUSG00000030431	-1.70378	0.917728	82.8031	9.0648e-20	3.03307e-18	ENSMUSG00000035606	1.69342	5.47812	109.055	1.57813e-25	5.35144e-24	ENSMUSG00000090213	-0.995643	4.15694	93.9327	3.26432e-22	1.12123e-20	ENSMUSG00000023938	0.960246
ENSMUSG00000025159	0.518877	5.75423	97.8653	4.4784e-23	1.59668e-21	ENSMUSG00000005447	0.598884	3.92538	94.6339	2.29065e-22	8.30195e-21	ENSMUSG00000071078	0.637199	3.67462	112.212	3.21147e-26	1.16985e-24	ENSMUSG00000004056	-0.576843	6.48304	106.343	6.20183e-25	2.29573e-23	ENSMUSG00000052565	2.70835	1.3828	66.019	4.46591e-16	1.4718e-14	ENSMUSG00000015133	-0.732563	4.66382	82.7104	9.5e-20	3.17097e-18	ENSMUSG00000052102	1.2248	3.75803	108.843	1.75625e-25	5.94097e-24	ENSMUSG00000062075	-1.01802	3.38818	93.8027	3.48598e-22	1.19446e-20	ENSMUSG00000039542	1.67576
ENSMUSG00000060181	-0.566651	4.6688	97.789	4.65423e-23	1.65535e-21	ENSMUSG00000040687	-0.3674	8.10688	94.5671	2.36924e-22	8.56596e-21	ENSMUSG00000110444	-1.00797	4.15785	112.192	3.24378e-26	1.17876e-24	ENSMUSG00000030722	1.16219	3.71395	106.271	6.43259e-25	2.37538e-23	ENSMUSG00000023348	-1.09831	3.65052	65.7774	5.04831e-16	1.65971e-14	ENSMUSG00000107906	2.89245	-0.511943	82.6883	9.60695e-20	3.1989e-18	ENSMUSG00000038816	-1.36446	5.76337	108.811	1.78524e-25	6.02444e-24	ENSMUSG00000057181	0.672003	5.28741	93.7402	3.59779e-22	1.22978e-20	ENSMUSG00000030208	-1.01157
ENSMUSG00000026031	0.92715	5.33541	97.7739	4.68986e-23	1.66399e-21	ENSMUSG00000042105	0.413084	7.5303	94.4856	2.46884e-22	8.90453e-21	ENSMUSG00000027430	0.443351	5.23107	112.174	3.27265e-26	1.18404e-24	ENSMUSG00000015966	-2.27731	-0.0337643	106.156	6.81692e-25	2.51123e-23	ENSMUSG00000032259	-2.81096	2.16331	65.7137	5.2141e-16	1.71007e-14	ENSMUSG00000026347	-2.91497	3.94911	82.6776	9.65908e-20	3.2085e-18	ENSMUSG00000032400	1.69365	0.925395	108.751	1.83987e-25	6.19378e-24	ENSMUSG00000036904	1.1951	3.5332	93.4125	4.24552e-22	1.44768e-20	ENSMUSG00000044408	-0.804585
ENSMUSG00000015755	-0.375956	6.29672	97.6472	4.99974e-23	1.76967e-21	ENSMUSG00000053137	-0.693932	4.72364	94.2101	2.83748e-22	1.02095e-20	ENSMUSG00000067825	0.475786	4.80366	112.173	3.27411e-26	1.18404e-24	ENSMUSG00000022388	1.30283	2.1796	105.77	8.28181e-25	3.04351e-23	ENSMUSG00000064280	-1.11572	2.54804	65.5856	5.56446e-16	1.82058e-14	ENSMUSG00000049804	-1.33648	4.55215	82.4071	1.10756e-19	3.67015e-18	ENSMUSG00000053965	1.13528	3.69047	108.351	2.25166e-25	7.56179e-24	ENSMUSG00000073968	-1.25616	3.28054	93.1693	4.80065e-22	1.63303e-20	ENSMUSG00000044348	1.19241
ENSMUSG00000028772	0.390005	5.67807	97.426	5.5907e-23	1.97408e-21	ENSMUSG00000028696	0.512406	4.12318	94.0989	3.00147e-22	1.07735e-20	ENSMUSG00000108348	-0.477323	7.27899	111.866	3.82206e-26	1.37888e-24	ENSMUSG00000024169	0.498754	5.40629	105.237	1.08352e-24	3.97231e-23	ENSMUSG00000027742	0.625198	6.73274	65.4638	5.91899e-16	1.93192e-14	ENSMUSG00000027550	1.40844	4.27897	82.3673	1.13008e-19	3.73579e-18	ENSMUSG00000036298	1.87493	2.48416	108.284	2.32878e-25	7.80197e-24	ENSMUSG00000031990	1.23588	4.74234	93.0962	4.98135e-22	1.69043e-20	ENSMUSG00000028461	-1.00027
ENSMUSG00000045968	1.66138	0.942264	97.2019	6.26075e-23	2.20538e-21	ENSMUSG00000020846	0.863599	4.72952	93.7766	3.53219e-22	1.26481e-20	ENSMUSG00000024038	0.652267	6.14393	111.745	4.06385e-26	1.4626e-24	ENSMUSG00002076083	0.460774	5.69541	105.215	1.09604e-24	4.00855e-23	ENSMUSG00000027655	-0.752635	4.33794	65.1448	6.95908e-16	2.26596e-14	ENSMUSG00000006219	-1.01844	7.13879	82.2763	1.18331e-19	3.90238e-18	ENSMUSG00000029120	4.2978	1.63105	108.161	2.47777e-25	8.28122e-24	ENSMUSG00000053965	1.12565	3.99409	93.0786	5.0258e-22	1.70142e-20	ENSMUSG00000063428	1.04666
ENSMUSG00000035933	-0.464193	5.72754	97.0863	6.63701e-23	2.33232e-21	ENSMUSG00000016763	-0.929616	5.5716	93.599	3.86385e-22	1.38026e-20	ENSMUSG00000020451	-0.538382	6.83565	111.727	4.10145e-26	1.4726e-24	ENSMUSG00000010025	-0.511689	5.8507	105.003	1.21939e-24	4.44903e-23	ENSMUSG00000014773	-0.993248	2.70145	65.1278	7.01951e-16	2.28016e-14	ENSMUSG00000078937	1.67817	4.47493	82.0541	1.32412e-19	4.3563e-18	ENSMUSG00000025776	-1.54566	0.709893	107.28	3.86475e-25	1.28859e-23	ENSMUSG00000022887	-2.65226	4.04252	92.8957	5.5123e-22	1.86166e-20	ENSMUSG00000026078	-0.742144
ENSMUSG00000031537	-0.591242	5.62795	97.0219	6.8566e-23	2.40374e-21	ENSMUSG00000034807	-0.503066	5.77548	93.2915	4.5133e-22	1.60842e-20	ENSMUSG00000039686	-0.453046	7.43513	111.671	4.21896e-26	1.51117e-24	ENSMUSG00000045205	-0.572793	5.70664	104.784	1.36218e-24	4.95814e-23	ENSMUSG00000028567	0.650077	4.74164	65.0838	7.17789e-16	2.32605e-14	ENSMUSG00000057606	1.87763	4.59161	82.0468	1.32905e-19	4.36207e-18	ENSMUSG00000031111	1.20683	5.78069	107.095	4.24418e-25	1.41172e-23	ENSMUSG00000030056	-1.18959	3.62704	92.4074	7.05485e-22	2.37693e-20	ENSMUSG00000027342	-0.836559
ENSMUSG00000005886	-0.375626	7.08516	96.5789	8.57556e-23	2.9992e-21	ENSMUSG00000036534	-0.42118	4.9191	93.2503	4.60823e-22	1.63834e-20	ENSMUSG00000028416	-0.458528	6.06444	111.637	4.29101e-26	1.53332e-24	ENSMUSG00000025017	1.12787	2.32292	104.764	1.37584e-24	4.99593e-23	ENSMUSG00000042604	-1.36955	1.22622	65.0675	7.2376e-16	2.33981e-14	ENSMUSG00000015093	-2.52061	0.991857	81.9363	1.40545e-19	4.60186e-18	ENSMUSG00000022297	0.997048	5.02594	107.087	4.26102e-25	1.41395e-23	ENSMUSG00000027378	0.774746	3.98264	92.3583	7.23229e-22	2.43091e-20	ENSMUSG00000032293	-0.88641
ENSMUSG00000041633	-0.787058	2.99219	96.4697	9.06186e-23	3.16175e-21	ENSMUSG00000028863	-0.498716	6.55094	93.2045	4.71617e-22	1.67273e-20	ENSMUSG00000029310	-0.471379	5.1985	111.43	4.76329e-26	1.69804e-24	ENSMUSG00000024829	0.523427	4.49824	104.483	1.5856e-24	5.74394e-23	ENSMUSG00000011179	-0.611923	5.98183	64.9921	7.51976e-16	2.41922e-14	ENSMUSG00000044375	4.95284	1.44119	81.922	1.41567e-19	4.62428e-18	ENSMUSG00000026986	1.49477	4.38193	106.792	4.94459e-25	1.63688e-23	ENSMUSG00000028096	0.673919	5.01427	92.2656	7.57907e-22	2.54142e-20	ENSMUSG00000027287	0.810228
ENSMUSG00000066043	-1.43731	4.50414	96.4618	9.09838e-23	3.16697e-21	ENSMUSG00000096255	-1.90201	1.07142	93.106	4.95665e-22	1.75386e-20	ENSMUSG00000052605	1.71961	2.91063	111.237	5.25098e-26	1.86746e-24	ENSMUSG00000058586	1.0321	3.04559	104.428	1.63038e-24	5.89218e-23	ENSMUSG00000021770	0.557017	5.30931	64.9902	7.52714e-16	2.41922e-14	ENSMUSG00000066319	1.59693	1.86326	81.806	1.50126e-19	4.89224e-18	ENSMUSG00000039929	0.936272	4.12693	106.714	5.14185e-25	1.69815e-23	ENSMUSG00000021840	-0.953661	4.75196	91.9745	8.77994e-22	2.93712e-20	ENSMUSG00000079426	0.704339
ENSMUSG00000026553	0.302649	7.8261	96.3796	9.48412e-23	3.29343e-21	ENSMUSG00000015749	0.362265	7.27216	92.9958	5.24052e-22	1.84991e-20	ENSMUSG00000020717	-0.636049	4.05401	111.228	5.27313e-26	1.8709e-24	ENSMUSG00000047714	-0.581964	6.49826	104.377	1.67229e-24	6.02932e-23	ENSMUSG00000031803	1.09338	2.7239	64.9877	7.53666e-16	2.41922e-14	ENSMUSG00000037129	3.67538	4.70148	81.7756	1.52452e-19	4.9563e-18	ENSMUSG00000024640	1.61429	2.7161	106.645	5.32427e-25	1.75424e-23	ENSMUSG00000074623	-2.62072	1.28437	91.9073	9.08351e-22	3.03149e-20	ENSMUSG00000055827	-2.48148
ENSMUSG00000014633	0.698693	3.35212	95.9841	1.15812e-22	4.01217e-21	ENSMUSG00000020263	-0.815486	7.15176	92.9872	5.26339e-22	1.85361e-20	ENSMUSG00000017677	0.640686	7.06931	110.919	6.1638e-26	2.18175e-24	ENSMUSG00000020630	0.772456	3.84222	104.349	1.69618e-24	6.10103e-23	ENSMUSG00000016356	-1.7761	1.54461	64.8823	7.95074e-16	2.54611e-14	ENSMUSG00000055312	3.06333	0.64642	81.7615	1.5354e-19	4.9799e-18	ENSMUSG00000034780	2.23971	1.78226	106.442	5.89983e-25	1.93929e-23	ENSMUSG00000036214	-1.05723	3.24267	91.7119	1.0026e-21	3.33814e-20	ENSMUSG00000003477	-2.37491
ENSMUSG00000024858	-0.328649	7.70857	95.897	1.21019e-22	4.1827e-21	ENSMUSG00000041035	0.462913	5.06462	92.8935	5.51856e-22	1.9389e-20	ENSMUSG00000028411	0.912261	5.46034	110.868	6.32574e-26	2.2338e-24	ENSMUSG00000095315	-2.79893	2.14361	104.248	1.7848e-24	6.39041e-23	ENSMUSG00000066880	0.729073	4.35855	64.8081	8.25602e-16	2.63765e-14	ENSMUSG00000021457	-0.790654	5.9412	81.7476	1.54626e-19	5.00332e-18	ENSMUSG00000029592	0.72197	4.29525	106.421	5.96132e-25	1.95489e-23	ENSMUSG00000039126	-1.60544	6.52759	91.6459	1.0366e-21	3.44322e-20	ENSMUSG00000069206	0.781647
ENSMUSG00000026170	-0.873328	3.40637	95.7655	1.29328e-22	4.45937e-21	ENSMUSG00000030498	-0.773971	3.34845	92.8457	5.65341e-22	1.98161e-20	ENSMUSG00000025217	-0.476395	6.40744	110.779	6.61353e-26	2.32995e-24	ENSMUSG00000020634	-1.03834	6.02553	104.248	1.78501e-24	6.39041e-23	ENSMUSG00000021234	0.889485	3.93367	64.7835	8.35983e-16	2.66455e-14	ENSMUSG00000068740	0.855832	4.22078	81.5435	1.71442e-19	5.53444e-18	ENSMUSG00000019039	-0.994946	4.13374	106.19	6.6986e-25	2.19151e-23	ENSMUSG00000048234	-1.26888	2.82677	91.6067	1.05735e-21	3.5039e-20	ENSMUSG00000021337	10.7374
ENSMUSG00000035278	0.52567	4.95101	95.739	1.31072e-22	4.50895e-21	ENSMUSG00000061086	-1.69403	2.13642	92.7781	5.84983e-22	2.04566e-20	ENSMUSG00000002031	-0.612774	5.20633	110.651	7.05505e-26	2.47968e-24	ENSMUSG00000032652	0.668574	6.49025	104.183	1.84449e-24	6.58788e-23	ENSMUSG00000054659	-1.28982	5.12483	64.7009	8.71751e-16	2.76856e-14	ENSMUSG00000010830	-1.31558	3.27382	81.4369	1.80946e-19	5.82755e-18	ENSMUSG00000048920	0.901786	5.92728	106.086	7.05906e-25	2.30403e-23	ENSMUSG00000033082	1.18664	4.87155	91.166	1.3211e-21	4.36768e-20	ENSMUSG00000020137	-1.26432
ENSMUSG00000039048	0.555448	5.37673	95.6026	1.40422e-22	4.81928e-21	ENSMUSG00000079641	0.559692	6.15345	92.7645	5.89023e-22	2.05498e-20	ENSMUSG00000050050	1.4494	0.456249	110.415	7.94757e-26	2.78685e-24	ENSMUSG00000001525	-0.464499	8.27774	104.169	1.85765e-24	6.61941e-23	ENSMUSG00000042670	-0.662522	5.44568	64.6988	8.72694e-16	2.76856e-14	ENSMUSG00000044788	-1.64278	3.46777	81.3715	1.87038e-19	6.0097e-18	ENSMUSG00000030934	0.852126	7.92484	105.884	7.81964e-25	2.54632e-23	ENSMUSG00000000739	-3.68873	-0.334991	91.1154	1.35535e-21	4.47045e-20	ENSMUSG00000026649	1.72221
ENSMUSG00000009281	1.02054	3.40187	95.4802	1.49381e-22	5.11481e-21	ENSMUSG00000034035	1.50638	2.17474	92.4564	6.88229e-22	2.39549e-20	ENSMUSG00000027175	-0.78733	5.67149	110.253	8.62703e-26	3.01805e-24	ENSMUSG00000029090	-0.584322	4.40436	104.125	1.89993e-24	6.75427e-23	ENSMUSG00000028140	-0.774072	5.83079	64.6485	8.95244e-16	2.83348e-14	ENSMUSG00000021696	-2.30731	0.846594	81.3222	1.91756e-19	6.14692e-18	ENSMUSG00000078502	-5.67576	-0.39317	105.664	8.73745e-25	2.83855e-23	ENSMUSG00000054509	-0.866815	5.67706	91.0728	1.38482e-21	4.55699e-20	ENSMUSG00000037418	4.7556
ENSMUSG00000027952	0.572188	5.39759	95.4655	1.5049e-22	5.1408e-21	ENSMUSG00000006010	0.445965	6.10718	92.3323	7.32774e-22	2.5446e-20	ENSMUSG00000038683	0.435002	5.21597	110.17	8.99573e-26	3.13972e-24	ENSMUSG00000026114	1.86813	-0.315928	103.845	2.18728e-24	7.75771e-23	ENSMUSG00000025780	-0.968713	4.82706	64.5844	9.2485e-16	2.92038e-14	ENSMUSG00000039108	0.811779	6.29104	81.2007	2.03915e-19	6.52148e-18	ENSMUSG00000053128	-2.65844	-0.209474	105.601	9.01933e-25	2.92331e-23	ENSMUSG00000031146	-0.738741	4.33337	90.8794	1.52702e-21	5.01324e-20	ENSMUSG00000021963	0.572059
ENSMUSG00000018666	0.492145	5.92738	95.2056	1.71606e-22	5.84855e-21	ENSMUSG00000055523	-1.25297	2.01902	92.2681	7.56948e-22	2.62245e-20	ENSMUSG00000020198	0.307504	7.84886	110.071	9.45417e-26	3.29207e-24	ENSMUSG00000038268	-1.61443	2.53773	103.83	2.20419e-24	7.79954e-23	ENSMUSG00000029082	-2.33107	3.65988	64.5255	9.5291e-16	2.99788e-14	ENSMUSG00000027775	1.68866	6.47012	81.1795	2.06118e-19	6.57666e-18	ENSMUSG00000049871	-1.70964	1.54492	105.542	9.2929e-25	3.00499e-23	ENSMUSG00000003070	-1.74349	0.379916	90.8315	1.56442e-21	5.12411e-20	ENSMUSG00000042115	1.70064
ENSMUSG00000045482	-0.412229	7.53306	95.1937	1.72637e-22	5.87006e-21	ENSMUSG00000035696	-0.390585	5.37275	91.9178	9.03505e-22	3.12295e-20	ENSMUSG00000055963	0.758278	4.24364	110.027	9.66676e-26	3.3583e-24	ENSMUSG00000082361	2.7232	1.40718	103.767	2.27553e-24	8.03337e-23	ENSMUSG00000051483	-0.809484	4.33175	64.5236	9.53811e-16	2.99788e-14	ENSMUSG00000004626	-1.56398	3.18903	81.1742	2.06673e-19	6.57909e-18	ENSMUSG00000037013	-0.618611	5.64597	104.987	1.22962e-24	3.96696e-23	ENSMUSG00000078502	-6.21455	-0.371648	90.4192	1.92687e-21	6.29669e-20	ENSMUSG00000028559	-0.947964
ENSMUSG00000056209	-1.03189	1.70485	94.773	2.13523e-22	7.2435e-21	ENSMUSG00000049739	-0.439852	5.3372	91.7527	9.82147e-22	3.38693e-20	ENSMUSG00000002100	-2.92487	4.1345	109.698	1.14123e-25	3.95556e-24	ENSMUSG00000027012	-0.402045	7.10689	103.689	2.36649e-24	8.33518e-23	ENSMUSG00000027882	0.535707	5.11694	64.4344	9.97981e-16	3.12947e-14	ENSMUSG00000032892	1.0018	5.19834	81.1201	2.12411e-19	6.74612e-18	ENSMUSG00000022032	-1.54015	5.3865	104.947	1.25448e-24	4.03779e-23	ENSMUSG00000001847	-0.570637	7.40894	90.3442	2.00134e-21	6.52492e-20	ENSMUSG00000036641	-1.67886
ENSMUSG00000042111	0.6424	3.9199	94.7261	2.18641e-22	7.40002e-21	ENSMUSG00000066191	-0.619584	3.92021	91.072	1.38539e-21	4.76652e-20	ENSMUSG00000032652	0.660891	6.53271	109.488	1.26875e-25	4.38743e-24	ENSMUSG00000030271	1.07294	2.68771	103.603	2.47213e-24	8.6872e-23	ENSMUSG00000039735	0.604578	5.50754	64.2267	1.10897e-15	3.46948e-14	ENSMUSG00000031189	-2.40212	1.15452	81.1073	2.13789e-19	6.77425e-18	ENSMUSG00000032289	2.00788	4.01681	104.875	1.30073e-24	4.17703e-23	ENSMUSG00000090266	-1.13904	4.21009	90.2702	2.07763e-21	6.75803e-20	ENSMUSG00000072115	-2.86584
ENSMUSG00000047976	0.541338	7.23907	94.6969	2.21883e-22	7.49249e-21	ENSMUSG00000021306	-1.13581	4.81622	90.9209	1.49536e-21	5.13302e-20	ENSMUSG00000029598	-0.597014	5.92775	109.387	1.3349e-25	4.60555e-24	ENSMUSG00000063506	1.01039	3.51899	103.527	2.5689e-24	9.0065e-23	ENSMUSG00000026389	-0.748688	5.10001	64.2148	1.11569e-15	3.4825e-14	ENSMUSG00000003934	1.25704	7.22547	80.976	2.28472e-19	7.22287e-18	ENSMUSG00000048965	1.2188	1.95444	104.774	1.36907e-24	4.38636e-23	ENSMUSG00000028555	-3.069	0.277229	90.173	2.18221e-21	7.08189e-20	ENSMUSG00000024856	-0.835471
ENSMUSG00000042064	1.21138	2.10535	94.688	2.2289e-22	7.50926e-21	ENSMUSG00000035964	0.476635	7.40108	90.8367	1.56032e-21	5.34373e-20	ENSMUSG00000078453	0.905461	3.11124	109.353	1.35821e-25	4.67523e-24	ENSMUSG00000037997	-0.52971	4.42579	103.49	2.61773e-24	9.15663e-23	ENSMUSG00000063767	-2.41249	-1.38394	64.1579	1.14837e-15	3.57628e-14	ENSMUSG00000027879	0.51593	5.77053	80.8655	2.41618e-19	7.62095e-18	ENSMUSG00000031382	-1.77681	6.37543	104.351	1.69499e-24	5.41812e-23	ENSMUSG00000102697	2.42299	-0.993834	89.9815	2.40401e-21	7.78381e-20	ENSMUSG00000038569	-2.77015
ENSMUSG00000029121	-0.336933	7.32533	94.6052	2.32409e-22	7.81204e-21	ENSMUSG00000017188	0.52724	5.37146	90.7293	1.64737e-21	5.62895e-20	ENSMUSG00000029402	-0.557195	4.04621	109.254	1.42784e-25	4.90368e-24	ENSMUSG00000032024	-0.642981	5.47796	103.342	2.82006e-24	9.84181e-23	ENSMUSG00000044148	-0.541462	4.41263	64.1436	1.1567e-15	3.59398e-14	ENSMUSG00000014313	0.740555	9.70709	80.8323	2.45715e-19	7.73242e-18	ENSMUSG00000028016	0.837211	3.76636	104.305	1.73423e-24	5.53089e-23	ENSMUSG00000037013	-0.586415	5.75126	89.6737	2.80864e-21	9.07314e-20	ENSMUSG00000029992	0.86005
ENSMUSG00000022537	-0.612279	5.22783	94.4568	2.50506e-22	8.40109e-21	ENSMUSG00000047518	3.0593	-1.21971	90.6943	1.67675e-21	5.71627e-20	ENSMUSG00000018800	0.478558	6.63874	109.243	1.43582e-25	4.9198e-24	ENSMUSG00000024227	-3.42036	1.82591	103.219	3.00107e-24	1.04496e-22	ENSMUSG00000026196	1.73165	1.49439	63.9399	1.28271e-15	3.97639e-14	ENSMUSG00000043243	-1.83386	1.94194	80.6762	2.65911e-19	8.34888e-18	ENSMUSG00000028467	0.614938	4.62915	104.223	1.80752e-24	5.75145e-23	ENSMUSG00000018819	-1.19641	6.15149	89.5972	2.91934e-21	9.40124e-20	ENSMUSG00000031783	-0.662096
ENSMUSG00000049775	0.454968	8.51438	94.1048	2.99247e-22	1.00129e-20	ENSMUSG00000026021	0.392264	6.18745	90.6758	1.69255e-21	5.75697e-20	ENSMUSG00000007610	-0.528934	4.65976	108.852	1.74861e-25	5.97794e-24	ENSMUSG00000033467	1.07259	3.91574	103.198	3.03201e-24	1.05333e-22	ENSMUSG00000026039	-2.92255	1.7909	63.868	1.3304e-15	4.11484e-14	ENSMUSG00000027004	-1.55814	3.14171	80.5858	2.7835e-19	8.71951e-18	ENSMUSG00000031196	1.60347	2.3696	103.887	2.14164e-24	6.7991e-23	ENSMUSG00000022297	0.883799	5.06649	89.5944	2.92353e-21	9.40124e-20	ENSMUSG00000025610	-2.56263
ENSMUSG00000028863	-0.477448	6.57002	93.8328	3.43327e-22	1.14617e-20	ENSMUSG00000063681	-2.39026	0.934052	90.6215	1.73961e-21	5.90362e-20	ENSMUSG00000034853	-0.735314	5.8818	108.742	1.84849e-25	6.30504e-24	ENSMUSG00000067276	-2.46403	1.84905	102.89	3.54361e-24	1.22826e-22	ENSMUSG00000026879	-0.932883	10.84	63.8596	1.33607e-15	4.12301e-14	ENSMUSG00000048440	-1.49045	2.30938	80.4345	3.00499e-19	9.39197e-18	ENSMUSG00000051502	1.05992	2.68966	103.846	2.18714e-24	6.92778e-23	ENSMUSG00000057228	3.6581	-0.303781	89.3719	3.27148e-21	1.04963e-19	ENSMUSG00000062410	-2.11074
ENSMUSG00000061787	0.612875	7.07475	93.8267	3.44397e-22	1.14713e-20	ENSMUSG00000015671	0.387296	6.41866	90.5517	1.80204e-21	6.10161e-20	ENSMUSG00000029322	3.21184	-0.0481102	108.657	1.92971e-25	6.56715e-24	ENSMUSG00000030512	0.561404	3.96994	102.651	3.99755e-24	1.38246e-22	ENSMUSG00000022602	2.56653	4.67087	63.7733	1.39594e-15	4.29797e-14	ENSMUSG00000009394	-2.56046	1.95389	80.4249	3.01965e-19	9.41637e-18	ENSMUSG00000035629	-0.799966	6.0321	103.738	2.30917e-24	7.2977e-23	ENSMUSG00000032350	0.690719	4.71852	89.355	3.29954e-21	1.05623e-19	ENSMUSG00000014077	0.845157
ENSMUSG00000066643	0.702253	6.11575	93.8158	3.46293e-22	1.15084e-20	ENSMUSG00000041375	0.436347	5.80694	90.4844	1.86443e-21	6.29857e-20	ENSMUSG00000045010	2.60517	0.61443	108.558	2.02812e-25	6.88643e-24	ENSMUSG00000012117	0.422236	6.02327	102.613	4.07464e-24	1.40594e-22	ENSMUSG00000027784	0.788823	6.83107	63.7364	1.42234e-15	4.36935e-14	ENSMUSG00000034485	0.787986	6.29281	80.2976	3.22063e-19	1.00204e-17	ENSMUSG00000064280	2.03676	3.58233	103.358	2.79747e-24	8.8209e-23	ENSMUSG00000024598	-2.67113	1.76099	89.3193	3.35958e-21	1.07301e-19	ENSMUSG00000026827	1.06146
ENSMUSG00000036334	-0.814632	3.37837	93.7108	3.65172e-22	1.21084e-20	ENSMUSG00000057858	0.676588	4.54697	90.1505	2.20711e-21	7.43942e-20	ENSMUSG00000037593	-1.09747	3.43534	108.48	2.10996e-25	7.14816e-24	ENSMUSG00000053226	0.734824	3.22445	102.32	4.72409e-24	1.62635e-22	ENSMUSG00000027524	-3.67498	2.63091	63.7277	1.42859e-15	4.37864e-14	ENSMUSG00000024098	-0.582734	6.94501	80.2731	3.26074e-19	1.01223e-17	ENSMUSG00000023021	-0.513637	4.6943	103.29	2.89553e-24	9.10948e-23	ENSMUSG00000048442	1.66706	4.68299	89.1656	3.63101e-21	1.15709e-19	ENSMUSG00000021214	4.55119
ENSMUSG00000076432	0.511047	7.72794	93.6311	3.80166e-22	1.25772e-20	ENSMUSG00000066151	-0.382085	5.90989	90.141	2.21773e-21	7.45835e-20	ENSMUSG00000048065	-3.89812	-0.613618	108.429	2.16422e-25	7.31545e-24	ENSMUSG00000035394	1.89876	0.370178	102.203	5.01186e-24	1.72153e-22	ENSMUSG00000037242	-0.587944	8.92502	63.5432	1.56886e-15	4.79773e-14	ENSMUSG00000028691	0.569605	8.53028	80.1531	3.46488e-19	1.07317e-17	ENSMUSG00000026437	-1.38364	3.9399	103.149	3.10793e-24	9.75567e-23	ENSMUSG00000024542	0.998713	4.23735	89.0799	3.79192e-21	1.20564e-19	ENSMUSG00000024811	-0.614332
ENSMUSG00000116165	-0.634803	5.41006	93.4267	4.21516e-22	1.39089e-20	ENSMUSG00000006392	0.543967	4.15858	90.0744	2.29365e-21	7.69636e-20	ENSMUSG00000035575	0.410598	5.7847	108.341	2.26301e-25	7.63219e-24	ENSMUSG00000035575	0.415545	5.78545	102.157	5.13021e-24	1.75822e-22	ENSMUSG00000079553	1.85279	0.546809	63.4991	1.60441e-15	4.89544e-14	ENSMUSG00000095567	0.535433	5.59368	80.1243	3.51588e-19	1.08653e-17	ENSMUSG00000018209	-0.675553	4.66617	103.131	3.13771e-24	9.82702e-23	ENSMUSG00000029120	3.94026	1.78285	89.0449	3.85949e-21	1.22437e-19	ENSMUSG00000025008	-0.873647
ENSMUSG00000037270	-0.334015	8.15977	93.423	4.22313e-22	1.39089e-20	ENSMUSG00000022125	0.767727	4.07317	89.9885	2.39549e-21	8.02007e-20	ENSMUSG00000029447	0.477788	7.63222	108.299	2.31112e-25	7.77697e-24	ENSMUSG00000021414	2.00078	1.48056	102.021	5.49403e-24	1.87869e-22	ENSMUSG00000029563	-1.38202	1.77769	63.2471	1.82332e-15	5.55091e-14	ENSMUSG00000108763	3.62187	1.83116	79.9322	3.87489e-19	1.19479e-17	ENSMUSG00000022272	1.03551	6.57998	102.954	3.43051e-24	1.072e-22	ENSMUSG00000046058	-1.09823	2.8179	88.9726	4.00309e-21	1.26708e-19	ENSMUSG00000032309	-0.508641
ENSMUSG00000000581	0.523312	5.45764	93.3286	4.42943e-22	1.45557e-20	ENSMUSG00000031659	1.01594	4.04547	89.949	2.44374e-21	8.16328e-20	ENSMUSG00000026005	0.541707	4.75616	108.12	2.52957e-25	8.49303e-24	ENSMUSG00000041966	0.598851	4.90696	101.99	5.58091e-24	1.90413e-22	ENSMUSG00000024059	0.632157	7.81838	63.1891	1.87789e-15	5.70426e-14	ENSMUSG00000015365	1.12992	6.86572	79.8387	4.06259e-19	1.24986e-17	ENSMUSG00000063179	0.788371	5.11005	102.943	3.4489e-24	1.07533e-22	ENSMUSG00000029410	-3.87984	-1.18523	88.8399	4.281e-21	1.35201e-19	ENSMUSG00000039952	0.743723
ENSMUSG00000039087	0.516618	6.60007	93.2795	4.54072e-22	1.48881e-20	ENSMUSG00000043243	-1.1415	1.75864	89.7305	2.72913e-21	9.09629e-20	ENSMUSG00000078853	1.11451	1.68669	108.036	2.63969e-25	8.84297e-24	ENSMUSG00000025047	-0.383368	5.42705	101.923	5.77338e-24	1.9654e-22	ENSMUSG00000060510	0.520722	5.33925	63.0634	2.00157e-15	6.06638e-14	ENSMUSG00000048371	1.12087	5.63379	79.8162	4.10916e-19	1.26137e-17	ENSMUSG00000027605	0.989399	5.74356	102.912	3.50404e-24	1.09008e-22	ENSMUSG00000016028	1.93157	4.35302	88.7695	4.43596e-21	1.39782e-19	ENSMUSG00000049555	1.43897
ENSMUSG00000096145	1.1175	1.44804	93.2554	4.59631e-22	1.50368e-20	ENSMUSG00000002459	0.606146	4.85755	89.7186	2.74555e-21	9.13065e-20	ENSMUSG00000045007	-0.988274	4.83771	108.014	2.66824e-25	8.91871e-24	ENSMUSG00000020628	-0.489976	5.97914	101.85	5.9892e-24	2.03433e-22	ENSMUSG00000054435	0.755327	5.65734	63.0457	2.01964e-15	6.10749e-14	ENSMUSG00000035403	-2.39348	2.7382	79.7532	4.24218e-19	1.29827e-17	ENSMUSG00000057363	0.595368	4.18044	102.726	3.84767e-24	1.19432e-22	ENSMUSG00000052102	1.28897	3.85771	88.7623	4.45219e-21	1.39981e-19	ENSMUSG00000057147	-0.792076
ENSMUSG00000029649	0.401952	6.0942	93.1469	4.85529e-22	1.58488e-20	ENSMUSG00000002345	0.650667	4.062	89.703	2.76733e-21	9.18261e-20	ENSMUSG00000010358	1.21268	1.54733	107.988	2.70405e-25	9.01831e-24	ENSMUSG00000027580	0.701417	2.99888	101.809	6.11492e-24	2.07241e-22	ENSMUSG00000040483	1.14554	4.88982	63.0202	2.04599e-15	6.17343e-14	ENSMUSG00000040797	2.07414	1.22456	79.7504	4.24825e-19	1.29827e-17	ENSMUSG00000026483	-0.921098	4.87499	102.671	3.95675e-24	1.22545e-22	ENSMUSG00000022247	-1.05076	4.49416	88.7277	4.53076e-21	1.42135e-19	ENSMUSG00000037262	-0.930878
ENSMUSG00000005410	0.790342	3.21845	92.8723	5.57807e-22	1.81677e-20	ENSMUSG00000046152	0.741853	3.41461	89.6616	2.82591e-21	9.35622e-20	ENSMUSG00000101578	-5.36337	-1.1892	107.907	2.81708e-25	9.37445e-24	ENSMUSG00000022438	-0.796292	4.47762	101.438	7.37369e-24	2.49349e-22	ENSMUSG00000024044	1.26736	4.96464	62.9578	2.11188e-15	6.35812e-14	ENSMUSG00000026365	-1.55466	8.59383	79.6538	4.46119e-19	1.36032e-17	ENSMUSG00000063229	-0.929619	9.03877	102.652	3.99594e-24	1.23484e-22	ENSMUSG00000032410	0.550633	5.70542	88.6493	4.71394e-21	1.47554e-19	ENSMUSG00000029701	-0.658185
ENSMUSG00000051627	1.863	1.39446	92.8671	5.59279e-22	1.81753e-20	ENSMUSG00000039048	0.477938	5.32382	89.6387	2.8588e-21	9.44416e-20	ENSMUSG00000007908	0.627103	4.7313	107.815	2.95081e-25	9.79773e-24	ENSMUSG00000025792	0.594589	3.91231	101.191	8.35357e-24	2.81859e-22	ENSMUSG00000031881	3.34605	3.8163	62.8712	2.20672e-15	6.62896e-14	ENSMUSG00000017692	-1.62423	3.86849	79.5693	4.65605e-19	1.41659e-17	ENSMUSG00000010751	-1.99494	0.815273	102.589	4.12478e-24	1.27184e-22	ENSMUSG00000074754	-1.1585	4.2351	88.3301	5.5395e-21	1.73011e-19	ENSMUSG00000052137	-1.08536
ENSMUSG00000033671	-0.467531	6.79255	92.7498	5.93427e-22	1.92425e-20	ENSMUSG00000026156	0.740421	4.49705	89.2513	3.47706e-21	1.14613e-19	ENSMUSG00000031429	0.726318	4.03934	107.611	3.27106e-25	1.08371e-23	ENSMUSG00000028601	-1.0206	3.64865	101.088	8.79975e-24	2.96258e-22	ENSMUSG00000004151	-1.21749	3.81017	62.7217	2.38082e-15	7.13616e-14	ENSMUSG00000038119	-1.56695	5.58177	79.5527	4.69528e-19	1.42537e-17	ENSMUSG00000069792	-9.89204	1.60649	102.478	4.36274e-24	1.34224e-22	ENSMUSG00000025656	0.737701	4.67521	88.277	5.69002e-21	1.77193e-19	ENSMUSG00000039660	0.612187
ENSMUSG00000031760	0.818154	7.44996	92.6821	6.14067e-22	1.98679e-20	ENSMUSG00000037894	0.452448	6.48616	89.0646	3.82136e-21	1.25684e-19	ENSMUSG00000047181	-0.724975	5.9101	107.53	3.40718e-25	1.12632e-23	ENSMUSG00000024038	0.70166	6.19834	101.076	8.85176e-24	2.97353e-22	ENSMUSG00000044258	-2.33124	4.85542	62.6215	2.50507e-15	7.49203e-14	ENSMUSG00000041313	-1.43448	4.56315	79.3916	5.09421e-19	1.54307e-17	ENSMUSG00000021228	4.19751	1.42464	102.466	4.38802e-24	1.34704e-22	ENSMUSG00000037145	-8.35282	1.09417	88.2741	5.6985e-21	1.77193e-19	ENSMUSG00000029017	-0.686918
ENSMUSG00000033460	0.459909	6.568	92.5879	6.44013e-22	2.0791e-20	ENSMUSG00000116165	-0.803021	5.3117	89.0524	3.84501e-21	1.26184e-19	ENSMUSG00000054302	0.529943	5.87759	107.506	3.44821e-25	1.13738e-23	ENSMUSG00000025894	-0.817902	4.91403	100.846	9.94408e-24	3.33312e-22	ENSMUSG00000025204	-0.908237	4.06212	62.5789	2.55986e-15	7.63908e-14	ENSMUSG00000020911	-2.11016	4.07137	79.321	5.27951e-19	1.59569e-17	ENSMUSG00000071648	-1.98513	4.3705	102.442	4.44224e-24	1.36069e-22	ENSMUSG00000037148	-0.638113	5.55469	88.116	6.17278e-21	1.91519e-19	ENSMUSG00000020009	-0.76337
ENSMUSG00000021982	0.430979	6.28037	92.1721	7.94571e-22	2.55953e-20	ENSMUSG00000027004	-1.22867	3.9313	88.9874	3.97339e-21	1.30111e-19	ENSMUSG00000015377	0.671566	6.67516	107.327	3.77516e-25	1.24249e-23	ENSMUSG00000021591	0.500871	4.87071	100.841	9.96905e-24	3.33417e-22	ENSMUSG00000015133	-0.718438	4.47821	62.482	2.68896e-15	8.00673e-14	ENSMUSG00000032398	0.722755	4.70635	79.2975	5.34262e-19	1.61122e-17	ENSMUSG00000032652	0.616474	5.17565	102.297	4.77819e-24	1.46039e-22	ENSMUSG00000030249	1.11228	8.65425	87.9208	6.81284e-21	2.10914e-19	ENSMUSG00000036816	-3.6948
ENSMUSG00000020171	0.578716	4.83946	91.7238	9.96569e-22	3.2032e-20	ENSMUSG00000033902	-0.438854	6.49812	88.8489	4.26144e-21	1.39238e-19	ENSMUSG00000077450	-0.454025	6.82135	107.283	3.8599e-25	1.2676e-23	ENSMUSG00000030946	-0.706171	3.60905	100.714	1.06254e-23	3.54589e-22	ENSMUSG00000041343	1.38052	0.764125	62.3933	2.81278e-15	8.35709e-14	ENSMUSG00000044258	-2.84523	5.36309	79.2647	5.43218e-19	1.63465e-17	ENSMUSG00000068877	1.18174	2.91479	102.23	4.94383e-24	1.50771e-22	ENSMUSG00000057322	-1.10296	6.90138	87.8705	6.9883e-21	2.15873e-19	ENSMUSG00000020783	-0.687406
ENSMUSG00000071659	0.306028	8.31844	91.5232	1.10294e-21	3.53735e-20	ENSMUSG00000064294	1.46022	2.55341	88.7387	4.50566e-21	1.46896e-19	ENSMUSG00000090213	-0.610478	4.35962	107.171	4.08396e-25	1.33826e-23	ENSMUSG00000095990	-4.87963	-0.294145	100.584	1.13457e-23	3.77802e-22	ENSMUSG00000035896	-2.15098	-0.447684	62.2124	3.08336e-15	9.14102e-14	ENSMUSG00000032458	-0.588437	7.0116	79.1192	5.84718e-19	1.75569e-17	ENSMUSG00000072718	3.21612	-0.285013	101.971	5.63293e-24	1.71411e-22	ENSMUSG00000044715	-0.777172	3.36724	87.6966	7.63065e-21	2.35201e-19	ENSMUSG00000044080	0.765411
ENSMUSG00000026986	0.813823	4.38915	91.4925	1.12015e-21	3.58473e-20	ENSMUSG00000039221	0.446435	5.82647	88.7218	4.54423e-21	1.47831e-19	ENSMUSG00000037905	0.356292	7.34038	107.006	4.43836e-25	1.45122e-23	ENSMUSG00000007655	0.857143	4.34726	100.465	1.20483e-23	4.00325e-22	ENSMUSG00000040987	1.14926	4.6814	62.1103	3.24744e-15	9.60647e-14	ENSMUSG00000054079	0.66354	4.22175	79.0371	6.09558e-19	1.82628e-17	ENSMUSG00000005268	3.1739	4.43166	101.921	5.77767e-24	1.75432e-22	ENSMUSG00000026127	-0.617176	4.86031	87.6631	7.76077e-21	2.3869e-19	ENSMUSG00000091002	-2.74285
ENSMUSG00000001666	0.695145	3.47285	91.3871	1.18142e-21	3.77259e-20	ENSMUSG00000078716	-0.392427	6.34425	88.6344	4.74954e-21	1.54174e-19	ENSMUSG00000030314	0.52054	4.71991	106.816	4.88522e-25	1.59386e-23	ENSMUSG00000002031	-0.589978	5.24176	100.213	1.36891e-23	4.53854e-22	ENSMUSG00000001930	-1.30312	7.13479	61.9832	3.46405e-15	1.0225e-13	ENSMUSG00000027978	-2.62461	2.51241	78.9682	6.31163e-19	1.8869e-17	ENSMUSG00000022696	-2.92702	0.509134	101.742	6.32369e-24	1.91594e-22	ENSMUSG00000063229	-0.895636	9.11491	87.5605	8.17423e-21	2.5086e-19	ENSMUSG00000027709	-0.86059
ENSMUSG00000038576	-0.459194	6.67577	91.1577	1.32667e-21	4.22722e-20	ENSMUSG00000033530	-0.364965	7.26814	88.5779	4.88728e-21	1.58301e-19	ENSMUSG00000051579	0.453392	4.9995	106.739	5.07922e-25	1.65356e-23	ENSMUSG00000038127	-0.382364	6.71922	99.5865	1.87782e-23	6.21227e-22	ENSMUSG00000007888	-2.45189	-0.29319	61.9558	3.51259e-15	1.03457e-13	ENSMUSG00000006216	2.73447	0.467836	78.9364	6.41405e-19	1.91336e-17	ENSMUSG00000024818	-1.37954	2.65699	101.608	6.76723e-24	2.04588e-22	ENSMUSG00000028030	0.58867	4.52104	87.5111	8.38075e-21	2.5664e-19	ENSMUSG00000057363	1.32967
ENSMUSG00000021557	-0.311354	8.00827	91.0899	1.37292e-21	4.36512e-20	ENSMUSG00000034175	0.57833	4.05317	88.5442	4.97125e-21	1.60673e-19	ENSMUSG00000022515	0.611427	5.74588	106.714	5.14225e-25	1.67045e-23	ENSMUSG00000020648	0.637078	2.69466	99.4942	1.96743e-23	6.49466e-22	ENSMUSG00000094076	1.86345	-0.296931	61.8344	3.73589e-15	1.09796e-13	ENSMUSG00000034342	-0.710458	5.70741	78.8598	6.6679e-19	1.98478e-17	ENSMUSG00000036995	1.34167	4.89151	101.499	7.15035e-24	2.15702e-22	ENSMUSG00000005813	0.753643	5.81412	87.4704	8.55517e-21	2.61414e-19	ENSMUSG00000016552	-2.03172
ENSMUSG00000028251	0.56821	4.23368	91.0705	1.38641e-21	4.39849e-20	ENSMUSG00000040170	2.31823	1.81385	88.4903	5.10841e-21	1.64749e-19	ENSMUSG00000075066	-4.92875	-1.2728	106.654	5.30031e-25	1.71808e-23	ENSMUSG00000015970	-1.76249	2.07094	99.4386	2.02344e-23	6.66512e-22	ENSMUSG00000040187	1.35111	1.28293	61.8007	3.80042e-15	1.11452e-13	ENSMUSG00000078502	-1.86941	0.188127	78.8244	6.78828e-19	2.01503e-17	ENSMUSG00000027712	0.610851	7.27925	101.473	7.24494e-24	2.18084e-22	ENSMUSG00000030942	0.518954	5.06008	87.3647	9.02473e-21	2.75166e-19	ENSMUSG00000016487	-0.66224
ENSMUSG00000018659	-0.559529	5.27572	90.9647	1.46261e-21	4.63022e-20	ENSMUSG00000037426	-0.380783	6.1488	88.2734	5.70048e-21	1.83447e-19	ENSMUSG00000000386	3.3409	1.24352	106.574	5.52059e-25	1.78563e-23	ENSMUSG00000007888	1.36078	1.88114	99.0914	2.41112e-23	7.92499e-22	ENSMUSG00000022587	0.917293	6.61254	61.7955	3.81045e-15	1.11505e-13	ENSMUSG00000025060	0.80026	7.90319	78.8214	6.79881e-19	2.01503e-17	ENSMUSG00000026070	-3.07607	2.31452	100.982	9.28406e-24	2.78862e-22	ENSMUSG00000026353	0.497966	6.23977	86.7795	1.21321e-20	3.69114e-19	ENSMUSG00000027671	-0.558015
ENSMUSG00000034613	0.564186	6.68478	90.9381	1.4824e-21	4.68278e-20	ENSMUSG00000064307	1.32194	2.30803	88.1939	5.93418e-21	1.90557e-19	ENSMUSG00000026614	-0.734805	4.62715	106.52	5.67098e-25	1.83032e-23	ENSMUSG00000033491	-1.36199	1.85317	99.0598	2.44988e-23	8.03509e-22	ENSMUSG00000049303	1.84647	1.93899	61.7811	3.83832e-15	1.12079e-13	ENSMUSG00000021591	-0.769193	4.94558	78.7102	7.19243e-19	2.1271e-17	ENSMUSG00000020717	-0.647585	7.31248	100.946	9.45453e-24	2.83372e-22	ENSMUSG00000058325	0.642165	5.86749	86.7648	1.22227e-20	3.7107e-19	ENSMUSG00000040564	3.12411
ENSMUSG00000028479	-0.620981	5.01935	90.8264	1.56846e-21	4.94403e-20	ENSMUSG00000034282	-2.17552	1.36953	88.1703	6.00543e-21	1.92431e-19	ENSMUSG00000021703	-0.583516	6.63763	106.431	5.93082e-25	1.91008e-23	ENSMUSG00000060487	-0.82741	4.31119	98.9629	2.57276e-23	8.41999e-22	ENSMUSG00000082361	1.26966	1.99082	61.6851	4.03019e-15	1.17429e-13	ENSMUSG00000022671	1.09569	3.49109	78.6632	7.36558e-19	2.17364e-17	ENSMUSG00000054226	-0.719466	3.88698	100.658	1.09305e-23	3.26907e-22	ENSMUSG00000063457	-1.31993	7.91479	86.5148	1.38697e-20	4.20168e-19	ENSMUSG00000021591	-1.29367
ENSMUSG00000074826	4.85896	1.05485	90.6412	1.72236e-21	5.41749e-20	ENSMUSG00000042111	0.652068	3.90129	88.1025	6.21503e-21	1.98721e-19	ENSMUSG00000038775	2.45608	1.79818	106.289	6.37436e-25	2.04853e-23	ENSMUSG00000035378	-0.937119	2.71349	98.8397	2.73785e-23	8.94111e-22	ENSMUSG00000039452	2.09635	1.07979	61.6516	4.09944e-15	1.19191e-13	ENSMUSG00000023960	-0.850117	5.0562	78.5868	7.65597e-19	2.25449e-17	ENSMUSG00000058587	-0.671942	5.97849	100.642	1.10228e-23	3.28962e-22	ENSMUSG00000005803	-1.03052	5.17935	86.1394	1.67689e-20	5.06909e-19	ENSMUSG00000048834	-2.96859
ENSMUSG00000043872	-0.585751	3.68718	90.5732	1.78256e-21	5.59487e-20	ENSMUSG00000095440	0.906193	2.2253	88.0435	6.40319e-21	2.043e-19	ENSMUSG00000020611	-0.402061	6.33384	106.176	6.74813e-25	2.16402e-23	ENSMUSG00000029600	-0.997937	3.75136	98.8009	2.79209e-23	9.09876e-22	ENSMUSG00000007097	0.985207	9.37875	61.5755	4.2609e-15	1.23621e-13	ENSMUSG00000054675	-2.01329	3.69219	78.5798	7.68329e-19	2.2577e-17	ENSMUSG00000070031	-2.31102	1.2788	100.614	1.11782e-23	3.32885e-22	ENSMUSG00000034783	-7.36862	0.689484	86.1316	1.68355e-20	5.07834e-19	ENSMUSG00000038973	2.60765
ENSMUSG00000055027	-1.98561	0.338909	90.4398	1.9069e-21	5.97238e-20	ENSMUSG00000036835	-0.722168	3.9857	87.7469	7.43889e-21	2.36839e-19	ENSMUSG00000027209	-5.08018	-0.194262	106.128	6.91358e-25	2.21234e-23	ENSMUSG00000050619	-1.10651	3.36961	98.7758	2.82768e-23	9.19509e-22	ENSMUSG00000006216	1.67104	0.43926	61.546	4.32511e-15	1.25216e-13	ENSMUSG00000032717	-2.64493	1.97691	78.4714	8.11664e-19	2.37996e-17	ENSMUSG00000025190	0.66339	9.91165	100.522	1.17092e-23	3.47956e-22	ENSMUSG00000025104	-0.920973	4.53501	86.0946	1.7153e-20	5.1631e-19	ENSMUSG00000039917	0.784456
ENSMUSG00000069516	-1.64659	2.53533	90.4255	1.92073e-21	6.00288e-20	ENSMUSG00000084786	0.397776	6.19987	87.0984	1.03255e-20	3.28042e-19	ENSMUSG00000038268	-1.45708	2.36797	105.975	7.46793e-25	2.38465e-23	ENSMUSG00000020083	0.675131	5.16799	98.1255	3.9269e-23	1.27424e-21	ENSMUSG00000053414	-1.83343	0.509549	61.4336	4.57936e-15	1.32295e-13	ENSMUSG00000028672	0.594223	6.38019	78.3567	8.60181e-19	2.51685e-17	ENSMUSG00000039178	0.816975	4.12897	100.439	1.22106e-23	3.62085e-22	ENSMUSG00000048731	1.29661	4.62485	85.9977	1.80145e-20	5.41085e-19	ENSMUSG00000035954	-1.62964
ENSMUSG00000033209	-0.575089	4.74792	90.3767	1.96873e-21	6.13986e-20	ENSMUSG00000002897	-0.854952	3.83925	86.9111	1.13511e-20	3.59863e-19	ENSMUSG00000020131	-1.2898	1.95106	105.958	7.53239e-25	2.40013e-23	ENSMUSG00000024352	-1.62124	0.237786	98.0187	4.14458e-23	1.34202e-21	ENSMUSG00000073491	3.64626	-0.000961115	61.3225	4.84502e-15	1.39672e-13	ENSMUSG00000030032	1.59918	1.54342	78.2536	9.06243e-19	2.646e-17	ENSMUSG00000024948	0.794356	6.27423	100.111	1.4408e-23	4.26337e-22	ENSMUSG00000032478	0.979193	3.55131	85.9463	1.84884e-20	5.54143e-19	ENSMUSG00000071855	1.16436
ENSMUSG00000040842	0.639432	5.60914	90.3352	2.01044e-21	6.25665e-20	ENSMUSG00000025261	-0.313494	9.13788	86.8475	1.1722e-20	3.70832e-19	ENSMUSG00000042485	1.67836	0.760461	105.853	7.94199e-25	2.52528e-23	ENSMUSG00000007610	-0.484599	4.59914	97.7124	4.83779e-23	1.56316e-21	ENSMUSG00000030972	-2.88244	2.73493	61.2317	5.07368e-15	1.45954e-13	ENSMUSG00000054626	-1.84246	1.46516	78.1669	9.46935e-19	2.75895e-17	ENSMUSG00000041798	-5.51171	2.89644	100.088	1.45765e-23	4.30409e-22	ENSMUSG00000075271	0.942445	2.64076	85.7287	2.06396e-20	6.17307e-19	ENSMUSG00000022204	-0.798208
ENSMUSG00000049404	1.62285	0.790095	90.325	2.0208e-21	6.27558e-20	ENSMUSG00000028691	0.392948	6.73852	86.6593	1.28923e-20	4.06993e-19	ENSMUSG00000024696	1.22425	0.93248	105.809	8.11882e-25	2.57605e-23	ENSMUSG00000005687	-0.442063	5.57355	97.5322	5.2987e-23	1.70847e-21	ENSMUSG00000021904	1.2599	4.92305	61.2182	5.1086e-15	1.46648e-13	ENSMUSG00000034453	0.707012	4.7223	77.8356	1.11985e-18	3.25586e-17	ENSMUSG00000049235	1.87977	-0.308756	99.9976	1.52582e-23	4.49585e-22	ENSMUSG00000021665	0.825298	5.20276	85.3116	2.5486e-20	7.60647e-19	ENSMUSG00000020814	1.16579
ENSMUSG00000032012	0.419822	5.93851	90.2424	2.10702e-21	6.52954e-20	ENSMUSG00000040055	0.72234	6.36335	86.3414	1.51407e-20	4.76964e-19	ENSMUSG00000050700	2.2953	1.21322	105.755	8.34182e-25	2.64122e-23	ENSMUSG00000067825	0.601808	4.80486	97.4918	5.40793e-23	1.74001e-21	ENSMUSG00000039960	-1.09041	3.29558	61.1875	5.18901e-15	1.48642e-13	ENSMUSG00000033439	0.86508	3.17023	77.7421	1.17413e-18	3.40646e-17	ENSMUSG00000024330	-2.53172	3.02528	99.8071	1.67991e-23	4.93944e-22	ENSMUSG00000028803	0.560173	5.35372	85.1696	2.73844e-20	8.15582e-19	ENSMUSG00000040964	1.01788
ENSMUSG00000041660	-0.998991	1.82402	90.23	2.12027e-21	6.55676e-20	ENSMUSG00000019853	1.19087	2.66468	86.1726	1.64898e-20	5.1837e-19	ENSMUSG00000030030	-0.665136	3.81486	105.712	8.52755e-25	2.69435e-23	ENSMUSG00000020668	-0.409202	7.94972	97.485	5.42669e-23	1.74237e-21	ENSMUSG00000021716	0.46435	4.94684	60.9753	5.7795e-15	1.65209e-13	ENSMUSG00000020363	-1.0379	4.46678	77.474	1.34481e-18	3.89344e-17	ENSMUSG00000078580	1.17849	2.47381	99.667	1.80298e-23	5.29015e-22	ENSMUSG00000069520	0.87187	3.99609	84.9606	3.04372e-20	9.04593e-19	ENSMUSG00000059834	-0.769435
ENSMUSG00000058135	-0.512618	7.03054	90.1876	2.16611e-21	6.68444e-20	ENSMUSG00000035203	-0.426382	7.79524	86.1676	1.65318e-20	5.18598e-19	ENSMUSG00000036819	-0.609326	5.20844	105.687	8.63577e-25	2.72281e-23	ENSMUSG00000022504	2.09881	-0.564918	97.3368	5.84833e-23	1.8738e-21	ENSMUSG00000023960	-0.797056	4.96512	60.935	5.89913e-15	1.68154e-13	ENSMUSG00000017493	-1.51784	7.27431	77.456	1.35711e-18	3.91971e-17	ENSMUSG00000023411	0.985681	3.36334	99.5481	1.91458e-23	5.60577e-22	ENSMUSG00000026072	-0.990217	4.25041	84.6925	3.48574e-20	1.03379e-18	ENSMUSG00000028989	-3.02462
ENSMUSG00000028800	0.440264	4.79386	90.1677	2.18807e-21	6.73805e-20	ENSMUSG00000049775	0.43145	8.59628	85.8944	1.89808e-20	5.94176e-19	ENSMUSG00000024164	-3.85646	2.70126	105.386	1.00503e-24	3.15887e-23	ENSMUSG00000032299	0.533209	5.31337	97.1733	6.35159e-23	2.03078e-21	ENSMUSG00000036218	-1.75011	1.44769	60.9322	5.90732e-15	1.68154e-13	ENSMUSG00000030302	2.1859	3.43478	77.4524	1.35959e-18	3.91971e-17	ENSMUSG00000026277	0.447925	6.67196	99.4845	1.977e-23	5.77641e-22	ENSMUSG00000037012	-1.18165	7.76542	84.4596	3.92144e-20	1.16057e-18	ENSMUSG00000046999	2.17908
ENSMUSG00000020180	-0.342818	5.48357	90.1213	2.24001e-21	6.88357e-20	ENSMUSG00000041415	-0.39533	6.92874	85.8666	1.92496e-20	6.01329e-19	ENSMUSG00000043286	2.90235	1.46742	105.384	1.00609e-24	3.15887e-23	ENSMUSG00000068039	-0.390978	7.18644	97.1671	6.37178e-23	2.03297e-21	ENSMUSG00000020363	-1.10763	4.15101	60.9194	5.94598e-15	1.68901e-13	ENSMUSG00000068115	-1.72973	2.96233	77.4207	1.38161e-18	3.97487e-17	ENSMUSG00000017692	-2.98067	3.30041	99.435	2.02709e-23	5.91036e-22	ENSMUSG00000033044	0.843434	7.66875	84.1647	4.55217e-20	1.34442e-18	ENSMUSG00000022964	0.755047
ENSMUSG00000025261	-0.258107	9.09086	90.0001	2.38146e-21	7.30298e-20	ENSMUSG00000050424	2.30391	-0.11882	85.8012	1.9896e-20	6.20225e-19	ENSMUSG00000032377	0.746094	2.97726	105.261	1.0706e-24	3.3544e-23	ENSMUSG00000035486	0.948795	5.75075	97.1102	6.55758e-23	2.08788e-21	ENSMUSG00000005410	1.03818	2.81883	60.9095	5.97589e-15	1.69396e-13	ENSMUSG00000038991	-0.708171	6.18856	77.388	1.40468e-18	4.0328e-17	ENSMUSG00000020585	0.516518	8.82218	99.366	2.09896e-23	6.10713e-22	ENSMUSG00000027122	0.706879	4.34672	84.1254	4.64369e-20	1.36858e-18	ENSMUSG00000024727	1.18778
ENSMUSG00000039809	-0.505136	8.16698	89.9132	2.48838e-21	7.61497e-20	ENSMUSG00000096446	3.41511	-0.620564	85.4161	2.41748e-20	7.52037e-19	ENSMUSG00000006095	-0.650655	5.51927	105.18	1.11545e-24	3.48764e-23	ENSMUSG00000038683	0.393275	5.2359	96.859	7.44431e-23	2.36527e-21	ENSMUSG00000023439	-2.03565	3.33308	60.8364	6.20218e-15	1.75444e-13	ENSMUSG00000054065	-2.61801	-0.165946	77.3568	1.42701e-18	4.08838e-17	ENSMUSG00000050147	-3.89076	-0.368486	99.2831	2.18863e-23	6.35477e-22	ENSMUSG00000029223	-3.02096	1.66851	84.087	4.73484e-20	1.39254e-18	ENSMUSG00000019278	1.42568
ENSMUSG00000022674	0.496131	5.58766	89.7678	2.67821e-21	8.17886e-20	ENSMUSG00000036120	0.588387	3.96249	85.2254	2.66217e-20	8.26436e-19	ENSMUSG00000022300	-0.69502	4.78057	105.145	1.13511e-24	3.54174e-23	ENSMUSG00000038437	-0.450048	7.80633	96.8301	7.55407e-23	2.39516e-21	ENSMUSG00000048416	-0.743882	6.90662	60.8135	6.27453e-15	1.77122e-13	ENSMUSG00000062198	-1.11605	3.52796	77.2453	1.5099e-18	4.31688e-17	ENSMUSG00000031647	1.58362	5.94037	99.1526	2.33778e-23	6.77374e-22	ENSMUSG00000021476	-0.786797	5.87991	84.0539	4.81474e-20	1.41309e-18	ENSMUSG00000054074	1.1961
ENSMUSG00000044442	-0.618884	3.94342	89.6886	2.78758e-21	8.49517e-20	ENSMUSG00000034453	0.457594	4.8491	85.1939	2.70495e-20	8.37975e-19	ENSMUSG00000040423	0.47987	6.45517	104.982	1.23248e-24	3.83756e-23	ENSMUSG00000023120	-5.03036	-1.4996	96.7101	8.02582e-23	2.53946e-21	ENSMUSG00000021250	-3.59816	3.73184	60.7681	6.42112e-15	1.80884e-13	ENSMUSG00000039745	0.856085	4.66719	77.1992	1.54555e-18	4.40963e-17	ENSMUSG00000034109	0.681103	6.04075	99.1256	2.36984e-23	6.85238e-22	ENSMUSG00000042842	-2.35756	4.1687	84.0375	4.85477e-20	1.42188e-18	ENSMUSG00000024922	1.03272
ENSMUSG00000036120	0.488825	4.02149	89.6043	2.90891e-21	8.84659e-20	ENSMUSG00000014075	0.607101	3.81181	85.0896	2.85142e-20	8.8152e-19	ENSMUSG00000073406	-2.02862	2.04476	104.978	1.23527e-24	3.83829e-23	ENSMUSG00000037321	1.17468	2.1236	96.3222	9.76279e-23	3.08266e-21	ENSMUSG00000018362	0.762966	6.83534	60.6488	6.82213e-15	1.91782e-13	ENSMUSG00000069867	2.27612	-0.0742212	77.1809	1.55992e-18	4.44141e-17	ENSMUSG00000020135	-2.37798	2.49453	99.0401	2.4744e-23	7.13989e-22	ENSMUSG00000021203	1.25734	3.16218	84.0114	4.91927e-20	1.43779e-18	ENSMUSG00000033596	-0.615223
ENSMUSG00000001847	-0.347376	7.94376	89.4927	3.07773e-21	9.34064e-20	ENSMUSG00000030032	0.640864	3.86287	85.0449	2.91661e-20	8.99809e-19	ENSMUSG00000028894	-0.470562	5.40794	104.943	1.25715e-24	3.89819e-23	ENSMUSG00000036764	0.820956	4.33276	96.2799	9.97358e-23	3.14271e-21	ENSMUSG00000017493	-1.10152	6.78806	60.5962	7.0069e-15	1.9657e-13	ENSMUSG00000036918	-1.05473	4.45353	77.123	1.60638e-18	4.56425e-17	ENSMUSG00000051817	1.07234	4.31925	98.9959	2.53022e-23	7.28589e-22	ENSMUSG00000026986	1.53948	4.38297	83.978	5.00312e-20	1.45928e-18	ENSMUSG00000040249	0.93337
ENSMUSG00000022620	0.548919	5.8509	89.3742	3.26773e-21	9.89683e-20	ENSMUSG00000000759	-0.481606	5.51629	84.9921	2.99566e-20	9.22292e-19	ENSMUSG00000024999	0.572887	4.57885	104.829	1.33174e-24	4.12099e-23	ENSMUSG00000028188	-1.49813	2.08653	95.9897	1.15485e-22	3.63147e-21	ENSMUSG00000027698	0.709655	7.86707	60.4143	7.68518e-15	2.15153e-13	ENSMUSG00000054408	0.567611	6.73516	77.1179	1.61053e-18	4.56661e-17	ENSMUSG00000054715	0.878426	3.12273	98.9135	2.63778e-23	7.57996e-22	ENSMUSG00000043336	0.751093	5.82538	83.8623	5.30461e-20	1.54402e-18	ENSMUSG00000026295	1.76428
ENSMUSG00000026669	-2.20997	-0.480425	89.3346	3.3337e-21	1.00759e-19	ENSMUSG00000040372	0.990386	4.17092	84.9527	3.05582e-20	9.38102e-19	ENSMUSG00000044165	-3.31582	2.46045	104.802	1.34996e-24	4.16877e-23	ENSMUSG00000095041	-6.21512	9.7673	95.9105	1.20198e-22	3.77188e-21	ENSMUSG00000021694	0.696014	3.03268	60.3919	7.77313e-15	2.17168e-13	ENSMUSG00000022865	0.962722	6.84261	77.1047	1.62129e-18	4.58764e-17	ENSMUSG00000030142	-4.00583	0.870314	98.8901	2.66904e-23	7.654e-22	ENSMUSG00000034758	1.30487	2.75181	83.8504	5.33675e-20	1.55018e-18	ENSMUSG00000028995	-1.27086
ENSMUSG00000045934	0.598963	3.78222	89.2297	3.51537e-21	1.06031e-19	ENSMUSG00000043110	-2.44192	-0.88265	84.9503	3.05957e-20	9.38102e-19	ENSMUSG00000039632	1.10003	2.96561	104.614	1.48424e-24	4.57403e-23	ENSMUSG00000046312	0.628732	5.53947	95.5465	1.44458e-22	4.52389e-21	ENSMUSG00000040855	-0.910565	2.43969	60.3051	8.12369e-15	2.2635e-13	ENSMUSG00000004961	1.89835	0.292294	77.0215	1.69109e-18	4.77533e-17	ENSMUSG00000051235	-1.92736	0.0520958	98.8206	2.76441e-23	7.91122e-22	ENSMUSG00000032456	1.2199	3.97776	83.5952	6.07203e-20	1.76014e-18	ENSMUSG00000073633	1.47474
ENSMUSG00000047767	0.705049	5.18951	89.1755	3.61299e-21	1.08752e-19	ENSMUSG00000050545	0.86278	3.4595	84.5853	3.68e-20	1.12602e-18	ENSMUSG00000028719	-0.422112	6.24842	104.483	1.58523e-24	4.87524e-23	ENSMUSG00000028392	1.46622	0.0656007	95.3588	1.58827e-22	4.96368e-21	ENSMUSG00000038954	-0.657806	2.93164	60.3023	8.13512e-15	2.2635e-13	ENSMUSG00000034292	0.711548	3.82011	76.9989	1.71051e-18	4.81329e-17	ENSMUSG00000044086	0.730509	6.99281	98.8014	2.79138e-23	7.97203e-22	ENSMUSG00000061414	-2.93549	2.13573	83.5299	6.27589e-20	1.81551e-18	ENSMUSG00000032018	1.64307
ENSMUSG00000031762	1.0623	5.50265	89.1685	3.62575e-21	1.08913e-19	ENSMUSG00000029798	-0.877495	3.314	84.4724	3.89621e-20	1.18974e-18	ENSMUSG00000025468	0.548653	6.58589	104.455	1.60823e-24	4.93584e-23	ENSMUSG00000025759	0.800144	4.72011	95.3377	1.60527e-22	5.00655e-21	ENSMUSG00000031712	2.20064	4.42949	60.2338	8.42324e-15	2.33887e-13	ENSMUSG00000000056	0.855038	6.70171	76.9977	1.71153e-18	4.81329e-17	ENSMUSG00000027890	1.72631	4.97822	98.7458	2.87086e-23	8.18224e-22	ENSMUSG00000039782	0.930953	5.95249	83.3829	6.76059e-20	1.95172e-18	ENSMUSG00000031483	0.581068
ENSMUSG00000038180	1.05806	1.97625	89.1237	3.70886e-21	1.11183e-19	ENSMUSG00000029636	0.347118	7.57973	84.4522	3.93622e-20	1.1995e-18	ENSMUSG00000040829	1.85708	-0.652331	104.274	1.76215e-24	5.39722e-23	ENSMUSG00000018451	0.699873	7.89332	95.2396	1.68682e-22	5.25015e-21	ENSMUSG00000020844	-0.691586	3.96678	60.1991	8.57333e-15	2.37569e-13	ENSMUSG00000030706	0.649843	5.74556	76.9632	1.74173e-18	4.88822e-17	ENSMUSG00000026888	-0.773924	7.06946	98.4038	3.41198e-23	9.70465e-22	ENSMUSG00000090100	0.637174	4.91942	83.0694	7.92223e-20	2.28241e-18	ENSMUSG00000028571	-1.0749
ENSMUSG00000037426	-0.322045	6.15515	88.7624	4.45202e-21	1.33189e-19	ENSMUSG00000040365	0.394904	6.06999	84.4077	4.02583e-20	1.22431e-18	ENSMUSG00000047502	1.93703	3.05656	104.176	1.8514e-24	5.65903e-23	ENSMUSG00000015013	-0.443525	5.05179	95.0498	1.8566e-22	5.76681e-21	ENSMUSG00000012519	0.959588	2.22719	60.1624	8.73464e-15	2.41546e-13	ENSMUSG00000027581	2.39559	-0.155741	76.9171	1.7829e-18	4.99359e-17	ENSMUSG00000036904	1.55336	3.53878	98.3329	3.5364e-23	1.00381e-21	ENSMUSG00000022032	-1.55669	5.32326	83.0111	8.15955e-20	2.346e-18	ENSMUSG00000116953	-2.04415
ENSMUSG00000020890	-1.32508	1.80654	88.6909	4.6158e-21	1.37808e-19	ENSMUSG00000068263	-1.11654	2.42541	84.3363	4.17375e-20	1.26672e-18	ENSMUSG00000062580	0.362382	6.54852	104.164	1.86275e-24	5.68213e-23	ENSMUSG00000020258	-0.990268	2.18235	95.0257	1.87934e-22	5.82557e-21	ENSMUSG00000014164	-0.964743	3.47831	60.1232	8.90999e-15	2.45894e-13	ENSMUSG00000058900	1.55084	1.71808	76.9087	1.79048e-18	5.00462e-17	ENSMUSG00000026616	4.92397	3.98272	98.2859	3.62134e-23	1.02583e-21	ENSMUSG00000028621	-2.82247	3.78999	82.9582	8.38059e-20	2.40465e-18	ENSMUSG00000031628	0.755529
ENSMUSG00000039942	1.59861	1.36738	88.6173	4.79077e-21	1.42742e-19	ENSMUSG00000028911	-0.327617	5.81472	84.2885	4.27602e-20	1.29512e-18	ENSMUSG00000038607	0.47146	4.94927	104.09	1.93363e-24	5.8864e-23	ENSMUSG00000051864	0.44996	5.17808	95.0042	1.89985e-22	5.87721e-21	ENSMUSG00000027035	0.940569	4.26081	60.0881	9.07035e-15	2.49812e-13	ENSMUSG00000020774	-2.55841	1.20216	76.8539	1.84085e-18	5.13497e-17	ENSMUSG00000030793	-1.86991	2.38848	98.1569	3.86509e-23	1.09265e-21	ENSMUSG00000039488	-5.02781	-0.165184	82.9079	8.59666e-20	2.46164e-18	ENSMUSG00000090113	2.18695
ENSMUSG00000020297	0.511118	9.28872	88.5069	5.06576e-21	1.50506e-19	ENSMUSG00000110404	1.57849	1.55218	84.1766	4.52506e-20	1.36778e-18	ENSMUSG00000031529	-0.369737	7.50761	104.024	1.99894e-24	6.07289e-23	ENSMUSG00000098022	1.57884	0.145125	94.9608	1.94192e-22	5.99518e-21	ENSMUSG00000038525	-0.979532	2.89951	59.9448	9.75549e-15	2.68138e-13	ENSMUSG00000027742	0.802181	6.69972	76.6707	2.0198e-18	5.62272e-17	ENSMUSG00000028358	1.68723	1.11372	97.7976	4.63417e-23	1.30742e-21	ENSMUSG00000015149	0.654535	6.45175	82.8176	8.99871e-20	2.57155e-18	ENSMUSG00000042453	1.87922
ENSMUSG00000029202	-0.441166	6.43656	88.5045	5.07187e-21	1.50506e-19	ENSMUSG00000051669	1.19492	1.75052	83.9869	4.98061e-20	1.50243e-18	ENSMUSG00000021143	-0.512916	7.29364	103.998	2.02568e-24	6.1417e-23	ENSMUSG00000028614	-0.536697	4.49832	94.9493	1.95325e-22	6.01798e-21	ENSMUSG00000043162	-0.862815	4.60011	59.7213	1.0929e-14	2.99785e-13	ENSMUSG00000040265	1.02017	2.70762	76.6103	2.0825e-18	5.78556e-17	ENSMUSG00000038217	-2.89954	1.37221	97.7494	4.74824e-23	1.33689e-21	ENSMUSG00000027329	1.27637	2.89458	82.7694	9.22052e-20	2.62962e-18	ENSMUSG00000030034	0.770943
ENSMUSG00000075296	-2.60772	1.86544	88.4881	5.11415e-21	1.51455e-19	ENSMUSG00000007777	0.538163	4.0657	83.9341	5.11545e-20	1.54e-18	ENSMUSG00000033021	-0.741754	5.43716	103.935	2.09062e-24	6.32583e-23	ENSMUSG00000028741	-0.492178	4.29112	94.897	2.00549e-22	6.16648e-21	ENSMUSG00000028188	1.10392	2.89145	59.6823	1.11473e-14	3.05158e-13	ENSMUSG00000071324	1.33035	5.34492	76.4652	2.24131e-18	6.21421e-17	ENSMUSG00000043648	2.55641	0.484155	97.625	5.05604e-23	1.42068e-21	ENSMUSG00000030793	-1.78815	2.5761	82.7057	9.52264e-20	2.7103e-18	ENSMUSG00000050373	0.666266
ENSMUSG00000051890	0.433892	4.7761	88.4323	5.26045e-21	1.55474e-19	ENSMUSG00000011263	1.9258	0.034802	83.9163	5.1618e-20	1.55082e-18	ENSMUSG00000021716	0.482166	4.52071	103.892	2.13695e-24	6.45298e-23	ENSMUSG00000056938	0.553177	5.35713	94.8767	2.02616e-22	6.21751e-21	ENSMUSG00000036098	-1.46489	3.61383	59.6091	1.15699e-14	3.16089e-13	ENSMUSG00000027312	0.662293	6.16535	76.4241	2.28839e-18	6.33199e-17	ENSMUSG00000027357	-0.702204	4.3297	97.5571	5.23255e-23	1.46733e-21	ENSMUSG00000057363	0.545195	4.32143	82.6371	9.85889e-20	2.80036e-18	ENSMUSG00000030768	1.57519
ENSMUSG00000020680	0.760767	6.31161	88.38	5.40147e-21	1.59322e-19	ENSMUSG00000023809	-0.516377	5.74101	83.8547	5.32496e-20	1.59663e-18	ENSMUSG00000039981	1.73689	0.0664572	103.553	2.53561e-24	7.64145e-23	ENSMUSG00000051499	0.90824	2.781	94.8396	2.06449e-22	6.3224e-21	ENSMUSG00000045776	0.869585	9.53965	59.5447	1.19545e-14	3.25941e-13	ENSMUSG00000039145	-1.97165	4.48971	76.3674	2.35508e-18	6.50343e-17	ENSMUSG00000038936	-0.829057	6.36425	97.3725	5.74385e-23	1.60747e-21	ENSMUSG00000024308	-0.881948	6.30684	82.6189	9.94987e-20	2.82053e-18	ENSMUSG00000025266	0.914904
ENSMUSG00000042541	0.543208	5.46418	88.364	5.44541e-21	1.60296e-19	ENSMUSG00000040740	1.17669	2.88987	83.4765	6.44775e-20	1.92942e-18	ENSMUSG00000024292	0.965844	2.77067	103.526	2.57038e-24	7.73071e-23	ENSMUSG00000008763	-0.486584	7.18663	94.7324	2.17941e-22	6.66096e-21	ENSMUSG00000031561	-1.19467	2.63059	59.4992	1.22341e-14	3.32896e-13	ENSMUSG00000001761	-1.03969	4.49109	76.3534	2.37181e-18	6.53651e-17	ENSMUSG00000028359	5.39074	4.77071	97.2479	6.11682e-23	1.70842e-21	ENSMUSG00000036264	-4.87169	3.28904	82.56	1.0251e-19	2.90007e-18	ENSMUSG00000002550	-0.670457
ENSMUSG00000021313	-0.315571	8.43566	88.3548	5.47062e-21	1.60716e-19	ENSMUSG00000030549	-2.24765	0.241614	83.3963	6.7147e-20	2.00528e-18	ENSMUSG00000037706	0.399169	8.16786	103.479	2.6315e-24	7.89871e-23	ENSMUSG00000037196	-1.12749	3.16344	94.6239	2.30217e-22	7.02209e-21	ENSMUSG00000014503	-2.81349	2.01316	59.4203	1.27351e-14	3.45835e-13	ENSMUSG00000022856	-1.192	3.01203	76.1685	2.60465e-18	7.16384e-17	ENSMUSG00000032363	1.16427	5.95364	97.1174	6.5336e-23	1.82118e-21	ENSMUSG00000025176	1.42777	0.998027	82.497	1.0583e-19	2.988e-18	ENSMUSG00000032128	-1.96836
ENSMUSG00000074890	1.07738	2.83519	88.3109	5.59354e-21	1.63999e-19	ENSMUSG00000022865	0.526392	6.0284	83.2784	7.12735e-20	2.12426e-18	ENSMUSG00000053216	-3.1121	-0.724248	103.458	2.66017e-24	7.96884e-23	ENSMUSG00000060445	-1.05736	1.71352	94.6145	2.31322e-22	7.04171e-21	ENSMUSG00000021091	-1.92359	5.16632	59.2923	1.35904e-14	3.68324e-13	ENSMUSG00000029189	2.41343	1.7059	76.1341	2.6504e-18	7.2751e-17	ENSMUSG00000091387	2.22832	-0.740253	96.9223	7.21031e-23	2.00579e-21	ENSMUSG00000035878	-2.16166	2.06182	82.4502	1.08364e-19	3.05316e-18	ENSMUSG00000026189	1.03503
ENSMUSG00000053746	1.12785	1.85831	88.2137	5.87516e-21	1.71913e-19	ENSMUSG00000042353	-2.46344	0.200185	83.1751	7.50969e-20	2.23376e-18	ENSMUSG00000041801	-0.649849	4.30033	103.143	3.11862e-24	9.32357e-23	ENSMUSG00000036672	-0.565884	4.13084	94.4374	2.52966e-22	7.68524e-21	ENSMUSG00000024866	-1.1485	3.85295	59.2323	1.40117e-14	3.78987e-13	ENSMUSG00000009145	1.13703	2.53364	75.9583	2.89719e-18	7.93669e-17	ENSMUSG00000033705	1.62482	6.12988	96.417	9.30667e-23	2.58322e-21	ENSMUSG00000095315	-1.99967	0.978294	82.4465	1.0857e-19	3.05316e-18	ENSMUSG00000019312	-0.913258
ENSMUSG00000000276	0.317267	6.94185	87.9807	6.60968e-21	1.93021e-19	ENSMUSG00000042408	0.544829	5.95976	83.0678	7.92863e-20	2.35369e-18	ENSMUSG00000075703	-0.374302	6.38511	103.036	3.29048e-24	9.8178e-23	ENSMUSG00000033715	-2.34726	1.59946	94.4058	2.57037e-22	7.79339e-21	ENSMUSG00000057092	-2.93844	0.33046	59.0928	1.50408e-14	4.06012e-13	ENSMUSG00000037593	2.07123	1.14242	75.9508	2.90825e-18	7.95115e-17	ENSMUSG00000003541	-1.98611	3.6345	96.4135	9.32308e-23	2.58322e-21	ENSMUSG00000057069	2.30168	2.29895	82.4294	1.09514e-19	3.07358e-18	ENSMUSG00000060477	0.674997
ENSMUSG00000015749	0.360023	7.18241	87.9549	6.69644e-21	1.95167e-19	ENSMUSG00000031596	0.742438	5.54244	83.0163	8.13806e-20	2.41106e-18	ENSMUSG00000027981	-0.563334	5.54647	102.838	3.63779e-24	1.08325e-22	ENSMUSG00000053552	0.764526	3.78307	94.3774	2.60749e-22	7.89025e-21	ENSMUSG00000021772	0.512372	5.6529	59.0567	1.53192e-14	4.12707e-13	ENSMUSG00000026113	0.561167	5.47701	75.8755	3.02122e-18	8.2436e-17	ENSMUSG00000034903	-0.792456	6.2532	96.0516	1.1193e-22	3.09518e-21	ENSMUSG00000054237	-0.783974	3.78655	82.1782	1.24354e-19	3.48315e-18	ENSMUSG00000027562	1.10759
ENSMUSG00000110404	1.5753	1.32042	87.8547	7.04438e-21	2.04901e-19	ENSMUSG00000074358	-0.812512	2.51843	82.9047	8.61043e-20	2.54596e-18	ENSMUSG00000020534	-1.45633	0.943503	102.802	3.70392e-24	1.10076e-22	ENSMUSG00000020526	0.556895	4.44962	94.2779	2.74198e-22	8.28078e-21	ENSMUSG00000046442	1.40812	5.31765	59.038	1.54658e-14	4.15491e-13	ENSMUSG00000060147	-0.58978	6.78033	75.8473	3.06467e-18	8.34561e-17	ENSMUSG00000042115	-1.98941	5.16403	95.8961	1.21075e-22	3.34144e-21	ENSMUSG00000053166	3.14092	2.37761	82.0687	1.31439e-19	3.67431e-18	ENSMUSG00000040462	0.961108
ENSMUSG00000035569	-0.283872	8.14316	87.835	7.11499e-21	2.06546e-19	ENSMUSG00000031429	0.534628	3.80917	82.8596	8.80932e-20	2.59962e-18	ENSMUSG00000039531	0.55253	4.36752	102.762	3.77876e-24	1.12078e-22	ENSMUSG00000064141	1.7658	1.19883	94.197	2.85637e-22	8.60919e-21	ENSMUSG00000026885	-1.03823	1.39494	59.0357	1.54838e-14	4.15491e-13	ENSMUSG00000008435	0.76682	5.65268	75.7762	3.17706e-18	8.63458e-17	ENSMUSG00000000889	-6.63897	1.13786	95.596	1.4089e-22	3.87465e-21	ENSMUSG00000018900	-0.600116	4.73713	81.9418	1.40155e-19	3.9102e-18	ENSMUSG00000004268	-0.773825
ENSMUSG00000068686	2.08577	0.706042	87.8172	7.17918e-21	2.07998e-19	ENSMUSG00000074582	-0.320064	6.89395	82.7989	9.08395e-20	2.67538e-18	ENSMUSG00000078580	0.962414	3.01079	102.719	3.86163e-24	1.1431e-22	ENSMUSG00000037710	0.377804	6.01598	94.0592	3.06228e-22	9.21161e-21	ENSMUSG00000003038	0.945562	5.38404	59.0248	1.55699e-14	4.16979e-13	ENSMUSG00000032735	0.826601	6.40594	75.7315	3.24975e-18	8.8147e-17	ENSMUSG00000042810	0.898879	5.73701	95.5951	1.40952e-22	3.87465e-21	ENSMUSG00000024777	0.977653	5.81277	81.8893	1.43924e-19	4.00746e-18	ENSMUSG00000021876	-1.93952
ENSMUSG00000028651	0.610411	3.75382	87.7708	7.34962e-21	2.12517e-19	ENSMUSG00000024327	1.38293	2.474	82.6333	9.87801e-20	2.90351e-18	ENSMUSG00000095041	-6.30507	9.8666	102.711	3.87811e-24	1.14572e-22	ENSMUSG00000051483	-0.67555	5.18644	93.8733	3.36383e-22	1.00988e-20	ENSMUSG00000006218	-2.11331	1.13389	58.8276	1.72109e-14	4.60018e-13	ENSMUSG00000045410	1.15141	4.63306	75.7146	3.2778e-18	8.87328e-17	ENSMUSG00000027245	1.17384	2.06107	95.4053	1.55141e-22	4.25631e-21	ENSMUSG00000055150	1.75603	2.27384	81.5918	1.67309e-19	4.64941e-18	ENSMUSG00000048387	2.68242
ENSMUSG00000030823	-1.3661	1.66133	87.7409	7.46143e-21	2.15326e-19	ENSMUSG00000022704	0.606072	4.86084	82.6012	1.00398e-19	2.94526e-18	ENSMUSG00000032023	1.82427	1.52125	102.622	4.05706e-24	1.19624e-22	ENSMUSG00000044339	1.24449	2.5612	93.8278	3.4421e-22	1.03134e-20	ENSMUSG00000052926	-0.614737	3.94355	58.7222	1.81579e-14	4.84376e-13	ENSMUSG00000046318	-1.64867	2.71531	75.632	3.41779e-18	9.23409e-17	ENSMUSG00000025169	0.815461	3.75825	95.1922	1.72767e-22	4.73055e-21	ENSMUSG00000038623	1.32367	4.72706	81.4539	1.79396e-19	4.97551e-18	ENSMUSG00000092060	-3.05234
ENSMUSG00000002147	0.806611	4.23981	87.6712	7.72915e-21	2.22615e-19	ENSMUSG00000073702	0.353116	7.48267	82.5322	1.03961e-19	3.04381e-18	ENSMUSG00000022601	0.601753	6.45466	102.585	4.13177e-24	1.21587e-22	ENSMUSG00000040552	1.8835	1.15522	93.6562	3.75368e-22	1.1225e-20	ENSMUSG00000040812	-1.50661	0.723591	58.6727	1.86205e-14	4.95745e-13	ENSMUSG00000027305	0.754469	5.30822	75.4697	3.71067e-18	1.00057e-16	ENSMUSG00000033554	0.738535	3.01658	95.015	1.88945e-22	5.16337e-21	ENSMUSG00000014873	0.612878	4.29496	81.3116	1.9279e-19	5.3365e-18	ENSMUSG00000036218	-3.09162
ENSMUSG00000041920	0.592686	4.69953	87.6177	7.94122e-21	2.28275e-19	ENSMUSG00000006154	2.26913	0.761403	82.528	1.04183e-19	3.04434e-18	ENSMUSG00000028293	-0.640328	4.08745	102.541	4.22457e-24	1.24075e-22	ENSMUSG00000025609	-0.440024	7.16616	93.4866	4.08963e-22	1.22057e-20	ENSMUSG00000024098	-0.480398	6.68722	58.5997	1.93245e-14	5.13481e-13	ENSMUSG00000000581	0.535228	5.48398	75.2545	4.13791e-18	1.11239e-16	ENSMUSG00000035765	-0.801509	5.58868	94.9469	1.95562e-22	5.33376e-21	ENSMUSG00000047193	1.36172	3.49327	81.288	1.95109e-19	5.39012e-18	ENSMUSG00000025857	0.73494
ENSMUSG00000078713	0.559815	4.36836	87.5237	8.32751e-21	2.38912e-19	ENSMUSG00000029649	0.441962	6.13431	82.3379	1.147e-19	3.34512e-18	ENSMUSG00000057176	1.0975	2.59528	102.515	4.28214e-24	1.2552e-22	ENSMUSG00000000594	0.707751	6.00277	93.2726	4.55657e-22	1.35727e-20	ENSMUSG00000003662	-0.493127	5.02396	58.572	1.95987e-14	5.19749e-13	ENSMUSG00000033526	0.978227	6.78442	75.2528	4.14152e-18	1.11239e-16	ENSMUSG00000027445	-4.67262	-0.69484	94.8791	2.02377e-22	5.50548e-21	ENSMUSG00000028184	0.64587	6.26101	81.2733	1.96568e-19	5.41982e-18	ENSMUSG00000045467	1.39501
ENSMUSG00000046152	0.671462	3.3749	87.5126	8.37432e-21	2.39786e-19	ENSMUSG00000096795	1.70077	0.086483	82.3332	1.14973e-19	3.34655e-18	ENSMUSG00000021770	0.490138	6.95318	102.433	4.46209e-24	1.3054e-22	ENSMUSG00000024292	0.760905	2.77849	93.2556	4.59599e-22	1.36634e-20	ENSMUSG00000002808	0.854086	4.98024	58.5137	2.01881e-14	5.34334e-13	ENSMUSG00000044647	2.56094	1.03948	75.2313	4.18685e-18	1.12237e-16	ENSMUSG00000020435	1.54981	5.3413	94.8764	2.02648e-22	5.50548e-21	ENSMUSG00000044709	-0.689215	4.26279	81.1576	2.08421e-19	5.73544e-18	ENSMUSG00000041372	-1.17652
ENSMUSG00000035852	1.95291	1.44274	87.4088	8.82559e-21	2.52216e-19	ENSMUSG00000052889	-0.61169	8.47792	82.217	1.21938e-19	3.54238e-18	ENSMUSG00000097638	1.88205	0.561213	102.218	4.9746e-24	1.45251e-22	ENSMUSG00000018809	-0.553712	3.88977	93.2021	4.72179e-22	1.40101e-20	ENSMUSG00000027996	-1.33767	1.77529	58.4973	2.03574e-14	5.37769e-13	ENSMUSG00000029490	-0.919065	3.88316	75.1912	4.27264e-18	1.14314e-16	ENSMUSG00000024691	-1.19002	3.33028	94.819	2.08614e-22	5.65651e-21	ENSMUSG00000024538	0.925636	4.35266	81.0364	2.21593e-19	6.08606e-18	ENSMUSG00000037032	1.16709
ENSMUSG00000040055	0.636343	6.2511	87.3922	8.90015e-21	2.53853e-19	ENSMUSG00000043419	0.458135	7.51354	82.172	1.24742e-19	3.61679e-18	ENSMUSG00000058586	1.07722	3.04509	101.93	5.75075e-24	1.67587e-22	ENSMUSG00000043286	2.71489	1.52025	92.9487	5.36676e-22	1.58929e-20	ENSMUSG00000002771	1.71188	1.69619	58.3416	2.20334e-14	5.80911e-13	ENSMUSG00000020658	0.986748	4.82615	74.9713	4.77615e-18	1.27537e-16	ENSMUSG00000095315	-2.30893	0.840465	94.6315	2.29339e-22	6.20641e-21	ENSMUSG00000024640	1.70842	2.9123	80.9881	2.27077e-19	6.22455e-18	ENSMUSG00000040372	1.51808
ENSMUSG00000047090	0.61769	3.74792	87.2791	9.42409e-21	2.68276e-19	ENSMUSG00000037813	-1.07202	2.2511	82.0228	1.34529e-19	3.893e-18	ENSMUSG00000026494	-0.790538	5.49762	101.436	7.38076e-24	2.14672e-22	ENSMUSG00000034473	0.49401	4.1132	92.9134	5.46331e-22	1.61475e-20	ENSMUSG00000000889	-2.12256	1.73639	58.207	2.35938e-14	6.20846e-13	ENSMUSG00000070034	-2.07749	3.11301	74.7771	5.2697e-18	1.40444e-16	ENSMUSG00000034472	1.80291	3.57706	94.6272	2.29837e-22	6.20781e-21	ENSMUSG00000037161	2.97561	-0.858806	80.9433	2.32293e-19	6.35521e-18	ENSMUSG00000074890	1.13084
ENSMUSG00000023017	-0.386117	6.43831	87.2676	9.47895e-21	2.69316e-19	ENSMUSG00000022537	-0.706703	5.24856	81.9931	1.36562e-19	3.94418e-18	ENSMUSG00000026730	-1.94089	0.327211	101.375	7.61233e-24	2.20979e-22	ENSMUSG00000096199	0.648689	3.35324	92.8467	5.6507e-22	1.6669e-20	ENSMUSG00000005958	-1.52062	3.46813	58.1785	2.39377e-14	6.28678e-13	ENSMUSG00000033096	0.640265	5.87497	74.7694	5.29036e-18	1.40722e-16	ENSMUSG00000041801	-1.28034	2.94832	94.5382	2.4041e-22	6.48084e-21	ENSMUSG00000041351	-1.6237	3.77616	80.7485	2.56346e-19	6.99969e-18	ENSMUSG00000026409	-1.13045
ENSMUSG00000024381	0.317747	7.95552	86.8439	1.17432e-20	3.33002e-19	ENSMUSG00000029490	1.14626	1.92983	81.9127	1.42234e-19	4.10006e-18	ENSMUSG00000045205	-0.578255	5.66026	101.319	7.83034e-24	2.26868e-22	ENSMUSG00000072919	-2.09704	0.574866	92.7796	5.84542e-22	1.72101e-20	ENSMUSG00000060512	1.8345	1.71568	58.0604	2.5419e-14	6.65665e-13	ENSMUSG00000046714	-1.72727	1.60251	74.7063	5.46221e-18	1.45012e-16	ENSMUSG00000041571	1.17962	6.90949	94.2968	2.71584e-22	7.30707e-21	ENSMUSG00000043673	2.00164	0.347898	80.5053	2.89928e-19	7.90137e-18	ENSMUSG00000044763	-0.786988
ENSMUSG00000004567	-0.409523	5.88462	86.7166	1.25239e-20	3.54457e-19	ENSMUSG00000090841	0.384903	7.97311	81.8091	1.49887e-19	4.31235e-18	ENSMUSG00000001289	0.44669	6.72835	101.261	8.06159e-24	2.33118e-22	ENSMUSG00000035112	0.877507	2.80741	92.7301	5.99341e-22	1.76118e-20	ENSMUSG00000028614	0.585627	4.69047	58.0585	2.54441e-14	6.65665e-13	ENSMUSG00000002844	0.677689	5.46269	74.6864	5.51735e-18	1.46194e-16	ENSMUSG00000090210	1.2824	1.00934	94.1725	2.89185e-22	7.76565e-21	ENSMUSG00000067158	-1.35683	4.90249	80.2454	3.30684e-19	8.99472e-18	ENSMUSG00000060860	-0.813955
ENSMUSG00000047037	0.471974	6.44221	86.7047	1.25998e-20	3.55919e-19	ENSMUSG00000040428	-1.21218	2.04123	81.7137	1.57299e-19	4.5169e-18	ENSMUSG00000030243	-0.691783	4.4374	101.249	8.11295e-24	2.34152e-22	ENSMUSG00000010663	-0.459998	7.68167	92.3741	7.17457e-22	2.10422e-20	ENSMUSG00000023064	-0.91284	2.81175	57.8629	2.81034e-14	7.33823e-13	ENSMUSG00000022436	-1.53518	0.963726	74.6056	5.74805e-18	1.52014e-16	ENSMUSG00000055945	-5.34453	-1.27111	94.168	2.89846e-22	7.76844e-21	ENSMUSG00000029250	0.638884	6.36471	80.2272	3.33736e-19	9.06029e-18	ENSMUSG00000021751	1.18492
ENSMUSG00000034898	-0.688617	4.43489	86.6623	1.28728e-20	3.62933e-19	ENSMUSG00000024346	0.356145	5.50719	81.7082	1.57735e-19	4.52074e-18	ENSMUSG00000069270	1.53359	0.827415	101.194	8.34021e-24	2.40249e-22	ENSMUSG00000060739	-1.10098	4.14651	92.3603	7.22475e-22	2.11487e-20	ENSMUSG00000045106	1.91333	0.93296	57.7701	2.9462e-14	7.67821e-13	ENSMUSG00000037406	-1.66248	1.70979	74.5423	5.93522e-18	1.56662e-16	ENSMUSG00000064090	0.960803	2.83417	94.1298	2.95492e-22	7.90456e-21	ENSMUSG00000000884	1.06996	2.76454	80.024	3.69883e-19	1.00223e-17	ENSMUSG00000038268	-1.20846
ENSMUSG00000025925	0.529387	4.09875	86.4216	1.45386e-20	4.09114e-19	ENSMUSG00000031985	-0.338688	5.87507	81.5983	1.6676e-19	4.77022e-18	ENSMUSG00000022696	-0.587501	5.34549	101.048	8.97591e-24	2.58066e-22	ENSMUSG00000031984	-0.449998	4.48275	92.3164	7.38713e-22	2.15826e-20	ENSMUSG00000027611	-1.43321	2.08037	57.7583	2.96392e-14	7.7096e-13	ENSMUSG00000030102	-0.783611	6.32297	74.5342	5.95961e-18	1.57005e-16	ENSMUSG00000029348	-3.20393	-0.324056	94.1217	2.96714e-22	7.92204e-21	ENSMUSG00000022195	0.67071	4.66963	79.9162	3.90639e-19	1.05645e-17	ENSMUSG00000022505	-1.06968
ENSMUSG00000031485	-0.389355	6.02976	86.1106	1.70148e-20	4.77877e-19	ENSMUSG00000036504	0.999394	3.91532	81.472	1.77759e-19	5.07515e-18	ENSMUSG00000039376	3.05452	0.42983	100.938	9.48951e-24	2.72311e-22	ENSMUSG00000045328	1.13018	1.47841	92.2804	7.52254e-22	2.19362e-20	ENSMUSG00000027004	-1.87436	2.80797	57.7393	2.99263e-14	7.7694e-13	ENSMUSG00000026880	-1.34271	5.76173	74.2993	6.71286e-18	1.76511e-16	ENSMUSG00000032456	1.08399	4.07372	93.8901	3.3354e-22	8.88824e-21	ENSMUSG00000098022	2.32337	-1.11897	79.7793	4.18648e-19	1.13003e-17	ENSMUSG00000032377	-1.34217
ENSMUSG00000021492	2.07008	0.000643352	85.9931	1.80562e-20	5.06158e-19	ENSMUSG00000052512	-0.430262	6.62189	81.2873	1.95179e-19	5.56185e-18	ENSMUSG00000044627	0.367157	6.60186	100.923	9.56421e-24	2.73931e-22	ENSMUSG00000020544	0.654985	4.40106	92.1695	7.95615e-22	2.31564e-20	ENSMUSG00000023909	0.730661	4.75872	57.6428	3.14315e-14	8.1446e-13	ENSMUSG00000025105	-2.20658	3.09344	74.2824	6.77058e-18	1.77689e-16	ENSMUSG00000026818	-4.13365	-1.13875	93.8844	3.34496e-22	8.89669e-21	ENSMUSG00000021905	0.665405	5.56388	79.6661	4.43344e-19	1.1944e-17	ENSMUSG00000033083	0.698927
ENSMUSG00000040740	1.12888	2.97225	85.9761	1.82127e-20	5.09573e-19	ENSMUSG00000022565	-0.395461	7.83641	81.1462	2.09618e-19	5.96195e-18	ENSMUSG00000025916	1.67114	-0.264581	100.739	1.04937e-23	2.99979e-22	ENSMUSG00000022814	-0.616052	4.31956	92.0422	8.48459e-22	2.46473e-20	ENSMUSG00000025759	0.554347	4.58497	57.5415	3.30922e-14	8.55859e-13	ENSMUSG00000042271	0.668243	3.85922	74.1999	7.05954e-18	1.8492e-16	ENSMUSG00000050989	-0.849231	5.03996	93.7903	3.50788e-22	9.31224e-21	ENSMUSG00000017491	0.7643	5.04639	79.6342	4.50563e-19	1.21154e-17	ENSMUSG00000026335	0.844215
ENSMUSG00000015968	-0.31509	6.63648	85.9689	1.8279e-20	5.10456e-19	ENSMUSG00000053746	0.954409	1.91134	81.0915	2.15501e-19	6.1176e-18	ENSMUSG00000026817	0.456834	6.88253	100.723	1.05812e-23	3.01906e-22	ENSMUSG00000078495	-9.90547	1.69007	92.03	8.53746e-22	2.47538e-20	ENSMUSG00000055341	-1.41482	0.926938	57.5094	3.36374e-14	8.68306e-13	ENSMUSG00000026193	-1.85495	7.6823	74.1811	7.12686e-18	1.86328e-16	ENSMUSG00000031877	-1.59824	2.18843	93.7405	3.59727e-22	9.53141e-21	ENSMUSG00000055733	1.03718	1.87576	79.628	4.51965e-19	1.213e-17	ENSMUSG00000016946	-0.758446
ENSMUSG00000020846	0.919564	4.72931	85.9131	1.88023e-20	5.24074e-19	ENSMUSG00000069089	0.390976	4.84055	81.0769	2.17103e-19	6.1514e-18	ENSMUSG00000033389	0.365868	7.2799	100.715	1.0623e-23	3.02523e-22	ENSMUSG00000079491	2.16084	2.46056	91.9811	8.75104e-22	2.53249e-20	ENSMUSG00000078552	2.06497	1.0294	57.1988	3.93909e-14	1.01489e-12	ENSMUSG00000079339	-5.38352	0.896045	74.1247	7.33368e-18	1.91371e-16	ENSMUSG00000033590	-1.69954	3.28542	93.6706	3.72654e-22	9.85518e-21	ENSMUSG00000033365	-0.966472	5.88425	79.6164	4.54639e-19	1.21786e-17	ENSMUSG00000037805	-0.944491
ENSMUSG00000020346	0.413719	5.89713	85.7469	2.045e-20	5.6892e-19	ENSMUSG00000038658	-0.365394	6.23431	81.0132	2.24216e-19	6.34091e-18	ENSMUSG00000001569	0.490477	5.27282	100.693	1.07409e-23	3.05302e-22	ENSMUSG00000054459	-0.429626	8.60874	91.7559	9.80535e-22	2.83222e-20	ENSMUSG00000037145	-2.37283	1.16426	57.1395	4.05978e-14	1.04401e-12	ENSMUSG00000021508	-2.86389	3.48684	74.0245	7.71545e-18	2.00952e-16	ENSMUSG00000050447	-4.02894	1.45001	93.6374	3.78957e-22	1.00029e-20	ENSMUSG00000030717	-1.88381	2.88941	79.4386	4.97441e-19	1.32999e-17	ENSMUSG00000040028	-0.870461
ENSMUSG00000031808	0.506866	6.91713	85.5379	2.27302e-20	6.31159e-19	ENSMUSG00000061518	0.480621	7.25374	80.9982	2.25923e-19	6.3771e-18	ENSMUSG00000064280	1.28789	1.88531	100.178	1.3929e-23	3.95172e-22	ENSMUSG00000028453	-0.69226	3.14818	91.6875	1.01506e-21	2.92641e-20	ENSMUSG00000069867	2.08253	-0.0993285	57.0322	4.28737e-14	1.10045e-12	ENSMUSG00000051113	2.34013	1.22092	73.996	7.82766e-18	2.03489e-16	ENSMUSG00000020088	-0.478962	7.20186	93.5265	4.00808e-22	1.05597e-20	ENSMUSG00000068854	-1.32128	3.23166	79.2472	5.48061e-19	1.46149e-17	ENSMUSG00000030359	2.63162
ENSMUSG00000020395	-2.35026	-0.408907	85.523	2.29019e-20	6.34729e-19	ENSMUSG00000035278	0.413481	4.93872	80.9309	2.33747e-19	6.58548e-18	ENSMUSG00000063362	0.547888	5.74143	100.116	1.43711e-23	4.06945e-22	ENSMUSG00000022575	1.04711	1.60085	91.2974	1.23626e-21	3.55738e-20	ENSMUSG00000048503	0.804356	3.89295	56.9877	4.38548e-14	1.12351e-12	ENSMUSG00000053774	0.626274	5.75035	73.9417	8.04579e-18	2.08765e-16	ENSMUSG00000091512	-0.740061	5.54334	93.4724	4.11906e-22	1.08316e-20	ENSMUSG00000082229	2.79648	-1.09346	79.2449	5.48694e-19	1.46149e-17	ENSMUSG00000079550	-2.74859
ENSMUSG00000067158	1.09693	2.34557	85.4612	2.36296e-20	6.53664e-19	ENSMUSG00000024404	0.503279	7.0023	80.8754	2.4041e-19	6.76046e-18	ENSMUSG00000035582	-4.74769	-0.633719	100.099	1.44983e-23	4.09776e-22	ENSMUSG00000026604	-0.77935	4.62771	91.1481	1.3331e-21	3.82884e-20	ENSMUSG00000020019	-0.765794	5.20096	56.9457	4.48002e-14	1.14557e-12	ENSMUSG00000027716	0.939471	3.2489	73.6441	9.35499e-18	2.42278e-16	ENSMUSG00000025887	-1.45857	3.10957	93.3371	4.41039e-22	1.15758e-20	ENSMUSG00000061436	0.825923	6.91145	78.9888	6.2463e-19	1.66062e-17	ENSMUSG00000039765	-1.31206
ENSMUSG00000052906	-0.51056	3.94745	85.439	2.38964e-20	6.598e-19	ENSMUSG00000067158	1.01663	2.26705	80.8467	2.43929e-19	6.84247e-18	ENSMUSG00000020330	1.93346	0.0441169	99.8578	1.63742e-23	4.61924e-22	ENSMUSG00000027329	0.882412	3.4971	90.8351	1.56161e-21	4.47671e-20	ENSMUSG00000027887	1.77017	1.90069	56.9329	4.50934e-14	1.1509e-12	ENSMUSG00000035165	2.43489	0.5027	73.6262	9.44023e-18	2.44026e-16	ENSMUSG00000002329	0.827422	6.25394	93.3126	4.46538e-22	1.1681e-20	ENSMUSG00000078963	-2.40499	0.687056	78.9821	6.2676e-19	1.66315e-17	ENSMUSG00000027787	-0.661969
ENSMUSG00000022665	-0.949332	2.90535	85.1627	2.74797e-20	7.57316e-19	ENSMUSG00000022025	-1.42653	0.263577	80.8441	2.44243e-19	6.84247e-18	ENSMUSG00000029213	-0.411705	5.25605	99.7785	1.70431e-23	4.79891e-22	ENSMUSG00000089872	0.57014	5.76683	90.8291	1.56636e-21	4.4819e-20	ENSMUSG00000046062	0.696305	5.15893	56.8284	4.75538e-14	1.21142e-12	ENSMUSG00000064368	2.66417	9.7359	73.5539	9.79239e-18	2.52655e-16	ENSMUSG00000039057	5.92821	4.14553	93.3118	4.46723e-22	1.1681e-20	ENSMUSG00000031647	1.59932	5.89317	78.777	6.95319e-19	1.84162e-17	ENSMUSG00000001065	-0.9506
ENSMUSG00000031546	-0.594674	3.57077	85.0196	2.95422e-20	8.12632e-19	ENSMUSG00000021013	0.642536	4.96035	80.7209	2.59964e-19	7.26925e-18	ENSMUSG00000059552	0.482296	4.42562	99.7394	1.7383e-23	4.88546e-22	ENSMUSG00000034371	0.794284	3.43636	90.7271	1.6492e-21	4.71009e-20	ENSMUSG00000040618	-0.851443	2.88541	56.7662	4.90839e-14	1.24805e-12	ENSMUSG00000012519	1.05826	2.4454	73.5379	9.87208e-18	2.54234e-16	ENSMUSG00000021555	0.734367	6.07901	93.2201	4.67899e-22	1.22118e-20	ENSMUSG00000020262	0.776725	5.69752	78.7201	7.15643e-19	1.8919e-17	ENSMUSG00000021646	0.667118
ENSMUSG00000042682	0.368026	6.38989	84.9456	3.06695e-20	8.42065e-19	ENSMUSG00000029084	1.36263	3.20082	80.6899	2.64067e-19	7.37018e-18	ENSMUSG00000031171	0.47566	4.47618	99.6429	1.8251e-23	5.11983e-22	ENSMUSG00000064373	0.619773	8.23553	90.5968	1.76141e-21	5.02118e-20	ENSMUSG00000030722	0.664984	3.18242	56.7427	4.96721e-14	1.26065e-12	ENSMUSG00000042985	-2.08152	6.71187	73.508	1.00231e-17	2.57639e-16	ENSMUSG00000025266	0.909596	6.03889	93.1693	4.8008e-22	1.25063e-20	ENSMUSG00000049791	0.67215	6.53578	78.6966	7.24215e-19	1.91098e-17	ENSMUSG00000062691	0.885197
ENSMUSG00000019659	0.468359	4.64391	84.9183	3.10953e-20	8.50851e-19	ENSMUSG00000056211	-0.564216	8.20196	80.0179	3.71042e-19	1.03366e-17	ENSMUSG00000090150	-0.562557	4.53829	99.5207	1.94126e-23	5.43383e-22	ENSMUSG00000068551	-0.527777	4.85857	90.4936	1.85572e-21	5.28016e-20	ENSMUSG00000025150	1.00623	5.05126	56.7332	4.99135e-14	1.26441e-12	ENSMUSG00000046402	-1.70086	4.60809	73.4098	1.05343e-17	2.70276e-16	ENSMUSG00000017417	-1.64998	3.31234	93.0877	5.00281e-22	1.30082e-20	ENSMUSG00000064370	-1.99397	14.1477	78.6872	7.27644e-19	1.91645e-17	ENSMUSG00000037138	-2.18747
ENSMUSG00000027777	0.775298	3.31987	84.9177	3.11054e-20	8.50851e-19	ENSMUSG00000047719	-0.602845	3.75527	79.7277	4.29735e-19	1.19494e-17	ENSMUSG00000030614	-0.61179	4.82077	99.5176	1.94427e-23	5.43383e-22	ENSMUSG00000027981	-0.578357	5.52978	90.4044	1.94134e-21	5.51349e-20	ENSMUSG00000032105	-3.13007	1.2579	56.5937	5.35825e-14	1.35483e-12	ENSMUSG00000033174	0.873824	7.54304	73.3695	1.07516e-17	2.75338e-16	ENSMUSG00000095041	-5.31068	7.28123	93.0548	5.08651e-22	1.32012e-20	ENSMUSG00000039007	-1.1972	5.32589	78.6365	7.46554e-19	1.96259e-17	ENSMUSG00000020268	0.83306
ENSMUSG00000025241	-0.528546	6.36569	84.7464	3.39193e-20	9.26099e-19	ENSMUSG00000040649	0.450049	5.45019	79.6818	4.39839e-19	1.22076e-17	ENSMUSG00000030672	2.11938	1.27093	99.502	1.95964e-23	5.46661e-22	ENSMUSG00000026456	0.655558	4.50258	90.2793	2.06803e-21	5.86235e-20	ENSMUSG00000028427	1.21247	5.01829	56.5598	5.45154e-14	1.37585e-12	ENSMUSG00000026510	-0.676802	4.27667	73.232	1.15269e-17	2.94643e-16	ENSMUSG00000006411	1.73244	0.0553513	92.9331	5.40918e-22	1.40126e-20	ENSMUSG00000043602	1.0791	3.83209	78.5989	7.6091e-19	1.99661e-17	ENSMUSG00000054263	0.781827
ENSMUSG00000024114	2.12222	1.21113	84.5562	3.73446e-20	1.01773e-18	ENSMUSG00000026986	0.890852	4.44635	79.6657	4.43435e-19	1.22845e-17	ENSMUSG00000034729	-0.623168	4.47773	99.0514	2.46036e-23	6.85066e-22	ENSMUSG00000031780	-2.44695	-0.683896	89.7542	2.69669e-21	7.63027e-20	ENSMUSG00000025279	3.48498	1.04229	56.5303	5.53389e-14	1.39405e-12	ENSMUSG00000028716	-2.38507	0.333197	72.9056	1.36004e-17	3.46999e-16	ENSMUSG00000031467	-0.561811	4.89584	92.7416	5.95869e-22	1.54075e-20	ENSMUSG00000027959	0.974108	1.92971	78.5839	7.66734e-19	2.00816e-17	ENSMUSG00000042410	1.06603
ENSMUSG00000090137	1.56628	2.39465	84.5334	3.77781e-20	1.02763e-18	ENSMUSG00000070814	0.372475	4.63418	79.6282	4.5194e-19	1.2497e-17	ENSMUSG00000034218	0.59786	5.67601	98.83	2.75139e-23	7.64682e-22	ENSMUSG00000021245	-1.0978	4.9205	89.6661	2.81943e-21	7.96281e-20	ENSMUSG00000048473	3.00588	0.744247	56.2263	6.45912e-14	1.62411e-12	ENSMUSG00000022956	0.856977	8.72554	72.8014	1.43375e-17	3.65129e-16	ENSMUSG00000032959	-0.746004	7.18669	92.5183	6.67035e-22	1.72157e-20	ENSMUSG00000079442	-0.806199	4.38423	78.3168	8.77725e-19	2.2946e-17	ENSMUSG00000085793	-1.07859
ENSMUSG00000034424	0.496396	4.99109	84.454	3.93265e-20	1.06778e-18	ENSMUSG00000056598	-0.971505	3.00361	79.5781	4.63525e-19	1.27936e-17	ENSMUSG00000021671	-0.442531	5.4779	98.7479	2.86779e-23	7.95561e-22	ENSMUSG00000043648	2.09484	1.44818	89.6295	2.87203e-21	8.09635e-20	ENSMUSG00000036864	-0.998077	1.65472	56.1608	6.67793e-14	1.67602e-12	ENSMUSG00000019923	-0.471536	5.47241	72.7001	1.50928e-17	3.83652e-16	ENSMUSG00000048826	1.8069	1.42294	92.3863	7.13058e-22	1.83695e-20	ENSMUSG00000015804	-0.712629	5.25542	78.2382	9.13369e-19	2.38337e-17	ENSMUSG00000031754	-0.666055
ENSMUSG00000046743	-0.493553	4.84616	84.3875	4.06719e-20	1.10227e-18	ENSMUSG00000019370	0.350349	10.4152	79.3963	5.08199e-19	1.40008e-17	ENSMUSG00000027200	-0.53397	6.64863	98.7039	2.93218e-23	8.1192e-22	ENSMUSG00000113255	0.736749	2.21435	89.5866	2.93511e-21	8.25893e-20	ENSMUSG00000038811	0.691392	3.54517	56.1544	6.69972e-14	1.67839e-12	ENSMUSG00000049957	-0.789359	3.87782	72.6563	1.54317e-17	3.91544e-16	ENSMUSG00000017057	0.969545	6.11588	92.318	7.38086e-22	1.89792e-20	ENSMUSG00000004798	0.51838	6.95988	78.2127	9.25236e-19	2.40988e-17	ENSMUSG00000022956	0.823206
ENSMUSG00000023938	0.514769	5.04755	84.3704	4.10247e-20	1.10978e-18	ENSMUSG00000028309	-0.484795	6.17773	79.3541	5.19189e-19	1.42772e-17	ENSMUSG00000031875	-0.907177	2.68706	98.4563	3.32269e-23	9.1836e-22	ENSMUSG00000044730	0.880521	4.76902	89.5149	3.0434e-21	8.54456e-20	ENSMUSG00000032609	-0.854498	3.67954	56.1301	6.7831e-14	1.69615e-12	ENSMUSG00000052915	0.46488	6.88918	72.5481	1.6301e-17	4.12838e-16	ENSMUSG00000029772	0.731611	5.0345	92.2493	7.64165e-22	1.96072e-20	ENSMUSG00000027950	-2.77631	-0.695954	78.1647	9.47962e-19	2.46453e-17	ENSMUSG00000058402	-1.09394
ENSMUSG00000019945	-1.60189	0.707406	84.1293	4.63448e-20	1.25139e-18	ENSMUSG00000035878	0.870892	2.89638	79.344	5.21855e-19	1.43242e-17	ENSMUSG00000027330	0.709095	4.36892	98.4191	3.38584e-23	9.34093e-22	ENSMUSG00000027875	-1.39427	3.50921	89.512	3.04783e-21	8.54456e-20	ENSMUSG00000042359	-1.09099	5.18441	56.0993	6.89032e-14	1.71979e-12	ENSMUSG00000021638	-2.41925	0.696138	72.442	1.72014e-17	4.34825e-16	ENSMUSG00000062464	3.55942	0.797147	92.2463	7.65323e-22	1.96072e-20	ENSMUSG00000030934	0.750809	7.94491	77.9978	1.03158e-18	2.67698e-17	ENSMUSG00000090137	1.81106
ENSMUSG00000029029	-0.551002	4.26531	84.1166	4.6644e-20	1.25716e-18	ENSMUSG00000050248	-1.0687	3.81423	79.3327	5.24835e-19	1.43654e-17	ENSMUSG00000020689	-1.13575	2.02212	98.2255	3.73355e-23	1.02813e-21	ENSMUSG00000057069	1.22416	3.7966	89.4887	3.08389e-21	8.62834e-20	ENSMUSG00000056209	-1.05348	3.33218	56.0496	7.06651e-14	1.76053e-12	ENSMUSG00000020946	-0.464421	5.90758	72.4384	1.72324e-17	4.34825e-16	ENSMUSG00000008682	-0.775702	8.20543	92.0884	8.28882e-22	2.11966e-20	ENSMUSG00000074825	1.05651	3.5163	77.9455	1.05921e-18	2.74365e-17	ENSMUSG00000022583	3.93529
ENSMUSG00000020018	0.661137	3.92544	83.7659	5.56966e-20	1.4984e-18	ENSMUSG00000006281	-1.35155	3.44253	79.331	5.25281e-19	1.43654e-17	ENSMUSG00000043648	2.04931	1.53934	97.973	4.24126e-23	1.1658e-21	ENSMUSG00000026915	-0.578688	8.02347	89.4854	3.08903e-21	8.62834e-20	ENSMUSG00000078671	0.82958	6.50332	55.9461	7.44859e-14	1.85232e-12	ENSMUSG00000068876	-3.90664	2.4091	72.4143	1.74447e-17	4.39377e-16	ENSMUSG00000021893	-0.611297	5.96801	92.0174	8.59171e-22	2.19309e-20	ENSMUSG00000023805	0.83535	6.26424	77.9344	1.0652e-18	2.7541e-17	ENSMUSG00000028639	1.68681
ENSMUSG00000020069	0.519411	6.00924	83.6058	6.03966e-20	1.62187e-18	ENSMUSG00000036086	-0.723253	3.02669	79.2615	5.44095e-19	1.48527e-17	ENSMUSG00000021939	0.310554	9.07773	97.8218	4.57769e-23	1.25598e-21	ENSMUSG00000030243	-0.73486	4.46518	89.3254	3.34936e-21	9.33841e-20	ENSMUSG00000039167	0.553909	6.17514	55.7956	8.04124e-14	1.99491e-12	ENSMUSG00000015709	-2.41443	0.109277	72.3328	1.81805e-17	4.57071e-16	ENSMUSG00000040613	-1.54432	2.51096	92.0043	8.64868e-22	2.2036e-20	ENSMUSG00000038417	-1.59168	5.39733	77.8839	1.0928e-18	2.8203e-17	ENSMUSG00000075376	-0.917697
ENSMUSG00000020439	0.965514	2.8053	83.4405	6.56627e-20	1.76007e-18	ENSMUSG00000035845	0.692939	3.89789	79.2203	5.55555e-19	1.51379e-17	ENSMUSG00000011171	-1.41659	3.12853	97.5308	5.3026e-23	1.45221e-21	ENSMUSG00000030846	0.386654	7.37053	89.2987	3.3948e-21	9.44782e-20	ENSMUSG00000042757	-1.36697	2.47272	55.7931	8.05135e-14	1.99491e-12	ENSMUSG00000032092	-1.85761	1.89827	72.1264	2.0184e-17	5.06516e-16	ENSMUSG00000055172	-1.09581	4.40229	91.753	9.81988e-22	2.49744e-20	ENSMUSG00000000889	-5.95169	1.37785	77.8628	1.1045e-18	2.84529e-17	ENSMUSG00000028381	-0.838005
ENSMUSG00000028998	0.414767	5.45934	83.2899	7.08613e-20	1.89596e-18	ENSMUSG00000026874	1.70449	0.354545	79.1619	5.72233e-19	1.55639e-17	ENSMUSG00000002814	0.725772	3.357	97.3183	5.90309e-23	1.61373e-21	ENSMUSG00000067149	2.03146	0.0992728	89.2841	3.42002e-21	9.50068e-20	ENSMUSG00000034442	0.562005	5.32565	55.7607	8.18503e-14	2.02434e-12	ENSMUSG00000038576	-2.57145	0.63428	72.0534	2.09453e-17	5.24663e-16	ENSMUSG00000025939	0.711884	4.81489	91.3121	1.2271e-21	3.11512e-20	ENSMUSG00000048920	0.839766	5.80916	77.8522	1.11049e-18	2.85552e-17	ENSMUSG00000032224	0.957894
ENSMUSG00000031600	-0.623486	6.55078	83.1089	7.76571e-20	2.07401e-18	ENSMUSG00000046330	0.457261	6.97039	78.9695	6.30762e-19	1.71246e-17	ENSMUSG00000021470	-0.625639	5.08494	97.2251	6.18764e-23	1.68844e-21	ENSMUSG00000000386	2.99615	1.47974	89.2504	3.47881e-21	9.64643e-20	ENSMUSG00000071072	-0.649725	6.33676	55.7456	8.2484e-14	2.0363e-12	ENSMUSG00000018919	-2.24098	2.12358	72.0313	2.11807e-17	5.29594e-16	ENSMUSG00000046058	-0.99596	2.74452	91.1413	1.33773e-21	3.38981e-20	ENSMUSG00000044080	-0.819599	8.66225	77.8446	1.11476e-18	2.86128e-17	ENSMUSG00000024131	0.863696
ENSMUSG00000008333	0.540058	4.54864	83.0102	8.16298e-20	2.17615e-18	ENSMUSG00000032359	1.00936	3.84976	78.8361	6.74821e-19	1.82875e-17	ENSMUSG00000036214	-1.39531	1.23923	97.0257	6.84319e-23	1.86393e-21	ENSMUSG00000020330	1.47869	-0.0293522	89.1034	3.74702e-21	1.03713e-19	ENSMUSG00000025076	0.911548	4.04863	55.6952	8.46267e-14	2.08541e-12	ENSMUSG00000060512	1.73517	1.53313	71.9924	2.16027e-17	5.39166e-16	ENSMUSG00000047044	-0.799635	3.3443	91.0839	1.37706e-21	3.48313e-20	ENSMUSG00000027580	0.643042	5.67334	77.8094	1.13478e-18	2.90739e-17	ENSMUSG00000022443	0.831407
ENSMUSG00000027130	-0.378072	6.43293	82.969	8.3352e-20	2.21804e-18	ENSMUSG00000044258	-1.78876	0.360477	78.709	7.19664e-19	1.94674e-17	ENSMUSG00000068551	-0.53068	4.85022	97.0162	6.87609e-23	1.86769e-21	ENSMUSG00000079036	0.537182	4.46817	89.0647	3.82114e-21	1.05573e-19	ENSMUSG00000028413	0.588272	7.12089	55.6726	8.56042e-14	2.10568e-12	ENSMUSG00000000058	0.719236	6.65336	71.9371	2.22165e-17	5.5348e-16	ENSMUSG00000027799	0.834972	5.21082	91.0381	1.4093e-21	3.55824e-20	ENSMUSG00000090206	2.45644	-0.984555	77.7768	1.15365e-18	2.95039e-17	ENSMUSG00000043424	-2.75867
ENSMUSG00000037752	-1.07217	2.76592	82.9382	8.46574e-20	2.2487e-18	ENSMUSG00000030543	2.41605	-0.198296	78.6875	7.27554e-19	1.96453e-17	ENSMUSG00000087408	0.550626	5.53431	97.0146	6.88187e-23	1.86769e-21	ENSMUSG00000008206	-0.419153	6.34234	89.0591	3.83193e-21	1.05679e-19	ENSMUSG00000052981	0.776858	3.54508	55.5705	9.01668e-14	2.2139e-12	ENSMUSG00000060636	0.666154	6.4454	71.9166	2.24487e-17	5.58253e-16	ENSMUSG00000021703	-0.881637	4.5947	90.7208	1.65444e-21	4.1696e-20	ENSMUSG00000042268	3.1297	-0.331035	77.7696	1.15787e-18	2.95582e-17	ENSMUSG00000053897	0.711207
ENSMUSG00000071866	0.414075	9.17734	82.9095	8.58952e-20	2.27746e-18	ENSMUSG00000018659	-0.553675	5.29979	78.3584	8.5944e-19	2.31646e-17	ENSMUSG00000021263	0.961114	1.54611	97.0096	6.89911e-23	1.86899e-21	ENSMUSG00000026848	0.475433	5.70785	89.0135	3.92119e-21	1.07946e-19	ENSMUSG00000027520	-2.43792	0.922159	55.4977	9.35698e-14	2.2933e-12	ENSMUSG00000026123	0.542578	7.45939	71.8575	2.31315e-17	5.74196e-16	ENSMUSG00000031990	1.43251	4.64592	90.5819	1.77476e-21	4.46477e-20	ENSMUSG00000041801	-1.59772	3.26007	77.7047	1.19658e-18	3.04913e-17	ENSMUSG00000045730	-1.08727
ENSMUSG00000037990	-0.955573	4.30205	82.7739	9.19967e-20	2.43485e-18	ENSMUSG00000024854	0.849829	2.56452	78.3128	8.79514e-19	2.36629e-17	ENSMUSG00000027962	0.561366	4.9928	96.9775	7.0121e-23	1.89617e-21	ENSMUSG00000049670	-0.484531	5.3809	88.9338	4.08245e-21	1.12183e-19	ENSMUSG00000003458	0.42117	5.73287	55.3519	1.0077e-13	2.46532e-12	ENSMUSG00000044968	-1.02033	3.21271	71.623	2.60509e-17	6.45498e-16	ENSMUSG00000057181	0.591038	5.33554	90.4903	1.85889e-21	4.66798e-20	ENSMUSG00000022096	-1.34242	5.06105	77.5246	1.31082e-18	3.33421e-17	ENSMUSG00000021222	1.05698
ENSMUSG00000054312	0.469174	4.48678	82.7418	9.35032e-20	2.47027e-18	ENSMUSG00000028037	-3.34197	-0.59039	78.2056	9.28559e-19	2.49375e-17	ENSMUSG00000068823	0.325628	8.04719	96.9444	7.1302e-23	1.92464e-21	ENSMUSG00000032657	0.521926	5.44782	88.5946	4.84617e-21	1.3293e-19	ENSMUSG00000028003	-2.71312	0.269126	55.3458	1.01084e-13	2.46855e-12	ENSMUSG00000033405	1.11008	1.91179	71.587	2.65301e-17	6.5619e-16	ENSMUSG00000042215	0.777626	5.29622	90.4286	1.91778e-21	4.8072e-20	ENSMUSG00000007379	1.47272	3.08697	77.4162	1.38477e-18	3.51597e-17	ENSMUSG00000030329	2.47831
ENSMUSG00000090223	-0.896561	3.99625	82.6371	9.85876e-20	2.59992e-18	ENSMUSG00000072694	-0.458109	5.92231	78.202	9.30245e-19	2.49379e-17	ENSMUSG00000026114	1.73862	-0.418127	96.6539	8.25705e-23	2.22481e-21	ENSMUSG00000035725	-0.632703	4.36604	88.3058	5.60798e-21	1.5355e-19	ENSMUSG00000039270	0.539812	5.1592	55.3267	1.02071e-13	2.48819e-12	ENSMUSG00000027792	-0.885593	5.61231	71.5802	2.66211e-17	6.5726e-16	ENSMUSG00000073680	-3.11787	0.0341916	90.2946	2.0521e-21	5.13467e-20	ENSMUSG00000032652	0.592683	5.27291	77.4097	1.3893e-18	3.52113e-17	ENSMUSG00000041921	-0.755738
ENSMUSG00000030543	2.65235	-0.100779	82.6003	1.0044e-19	2.64402e-18	ENSMUSG00000022415	0.341224	9.37	78.1789	9.41193e-19	2.51862e-17	ENSMUSG00000003199	-0.396739	5.9549	96.3813	9.47598e-23	2.54866e-21	ENSMUSG00000069920	-1.56128	1.78653	88.2685	5.7145e-21	1.56186e-19	ENSMUSG00000020218	-1.90417	2.23627	55.2745	1.04819e-13	2.5506e-12	ENSMUSG00000014164	-1.11842	3.52219	71.4122	2.89868e-17	7.14385e-16	ENSMUSG00000037148	-0.587793	5.63327	90.0116	2.36765e-21	5.91361e-20	ENSMUSG00000021747	2.24493	2.43302	77.2581	1.50012e-18	3.79519e-17	ENSMUSG00000024414	-0.689049
ENSMUSG00000028919	0.824989	3.90565	82.436	1.09146e-19	2.86805e-18	ENSMUSG00000025290	0.346252	7.7465	78.1033	9.77924e-19	2.61223e-17	ENSMUSG00000032942	-1.78959	1.13488	96.2599	1.00749e-22	2.70491e-21	ENSMUSG00000004626	-1.25811	4.01529	88.2276	5.83415e-21	1.59171e-19	ENSMUSG00000004814	-1.54486	2.1581	55.2301	1.07212e-13	2.60417e-12	ENSMUSG00000044156	-2.64949	-0.704451	71.3188	3.0392e-17	7.47676e-16	ENSMUSG00000025068	-1.75157	6.08531	89.9475	2.4457e-21	6.09762e-20	ENSMUSG00000039253	0.873804	3.31533	77.2437	1.51114e-18	3.81245e-17	ENSMUSG00000066607	2.16909
ENSMUSG00000028729	-0.450666	5.44688	82.3806	1.12248e-19	2.94429e-18	ENSMUSG00000068748	-0.34885	8.56994	78.071	9.94036e-19	2.65052e-17	ENSMUSG00000078786	-0.780769	3.92743	96.0913	1.09704e-22	2.94007e-21	ENSMUSG00000028284	-0.393668	6.23262	88.0476	6.38996e-21	1.74024e-19	ENSMUSG00000034570	-0.746703	5.146	55.2193	1.07803e-13	2.61383e-12	ENSMUSG00000019977	0.479607	6.1955	71.1595	3.29481e-17	8.09112e-16	ENSMUSG00000060512	-4.83191	1.14952	89.62	2.88591e-21	7.18232e-20	ENSMUSG00000052397	-0.906134	6.69318	77.2421	1.51234e-18	3.81245e-17	ENSMUSG00000028940	2.27745
ENSMUSG00000040479	-0.332087	8.60926	82.3436	1.14373e-19	2.9947e-18	ENSMUSG00000028759	0.28897	7.83651	78.0513	1.00399e-18	2.6723e-17	ENSMUSG00000038059	0.919443	2.26702	96.0744	1.10647e-22	2.96005e-21	ENSMUSG00000027165	-0.608026	4.38584	88.0403	6.4133e-21	1.74348e-19	ENSMUSG00000045868	2.78115	-0.679745	55.1856	1.09668e-13	2.65432e-12	ENSMUSG00000028452	0.595316	8.19155	71.0772	3.43519e-17	8.42081e-16	ENSMUSG00000020255	0.665094	4.27476	89.5923	2.92656e-21	7.27049e-20	ENSMUSG00000056941	0.738592	4.37897	77.2194	1.52981e-18	3.84961e-17	ENSMUSG00000031765	1.64238
ENSMUSG00000031985	-0.32264	5.84624	82.3092	1.16378e-19	3.04177e-18	ENSMUSG00000004032	-1.25665	5.98506	78.0228	1.01858e-18	2.70632e-17	ENSMUSG00000067276	-2.26287	1.3684	96.0096	1.14329e-22	3.05311e-21	ENSMUSG00000020180	-0.504336	5.45312	88.0361	6.42714e-21	1.74413e-19	ENSMUSG00000021732	-1.88769	1.00162	55.1286	1.12894e-13	2.72754e-12	ENSMUSG00000031661	-1.59438	2.35093	71.0037	3.56565e-17	8.72504e-16	ENSMUSG00000039253	0.903366	3.19907	89.5784	2.94725e-21	7.30888e-20	ENSMUSG00000004665	-0.866888	5.66031	77.1883	1.55409e-18	3.90375e-17	ENSMUSG00000044258	-2.35074
ENSMUSG00000059734	0.446969	6.13135	82.0734	1.31123e-19	3.42108e-18	ENSMUSG00000043991	0.463063	7.68116	78.0174	1.02136e-18	2.70886e-17	ENSMUSG00000092558	-0.647185	4.537	95.9921	1.15343e-22	3.07473e-21	ENSMUSG00000021770	0.44325	6.94671	87.9599	6.67964e-21	1.80944e-19	ENSMUSG00000032192	-0.638607	4.7042	55.1136	1.13762e-13	2.74363e-12	ENSMUSG00000027520	-3.02102	1.29426	70.9932	3.5845e-17	8.75561e-16	ENSMUSG00000027508	-0.969455	3.14132	89.4532	3.13979e-21	7.77252e-20	ENSMUSG00000031877	-2.00469	2.74698	77.0487	1.66796e-18	4.18233e-17	ENSMUSG00000094410	-0.859311
ENSMUSG00000042502	0.319973	6.62123	82.0501	1.32683e-19	3.45564e-18	ENSMUSG00000023330	0.687435	2.88611	77.9858	1.03785e-18	2.74771e-17	ENSMUSG00000020562	1.52	0.999195	95.8313	1.25101e-22	3.32892e-21	ENSMUSG00000027327	-0.619606	4.87	87.9157	6.83056e-21	1.84704e-19	ENSMUSG00000031488	-1.39364	2.80197	55.0912	1.15063e-13	2.77007e-12	ENSMUSG00000006218	-2.50959	0.565897	70.9767	3.6146e-17	8.81347e-16	ENSMUSG00000028411	0.759397	4.66409	89.3438	3.31826e-21	8.19975e-20	ENSMUSG00000027187	0.694659	7.71135	76.9807	1.72635e-18	4.32107e-17	ENSMUSG00000071379	-0.930948
ENSMUSG00000042105	0.393283	7.57828	81.8264	1.48579e-19	3.86279e-18	ENSMUSG00000015087	-0.334416	7.11671	77.8347	1.12035e-18	2.95577e-17	ENSMUSG00000015869	0.425311	5.57661	95.744	1.30739e-22	3.4728e-21	ENSMUSG00000024818	-1.5889	1.99815	87.9042	6.87024e-21	1.85448e-19	ENSMUSG00000055745	0.807517	4.12693	54.9706	1.22346e-13	2.94021e-12	ENSMUSG00000045667	-1.37691	3.9638	70.9718	3.62362e-17	8.81982e-16	ENSMUSG00000072704	-0.966396	6.5469	89.2799	3.42719e-21	8.45393e-20	ENSMUSG00000043366	1.79894	1.64704	76.966	1.73923e-18	4.34562e-17	ENSMUSG00000026279	0.702948
ENSMUSG00000034931	-0.401397	5.4374	81.8105	1.49781e-19	3.8841e-18	ENSMUSG00000024668	0.412998	5.33874	77.8346	1.12039e-18	2.95577e-17	ENSMUSG00000030452	0.471616	5.65572	95.6063	1.4016e-22	3.71648e-21	ENSMUSG00000001025	1.14718	3.94883	87.8677	6.99832e-21	1.88571e-19	ENSMUSG00000004043	-0.723033	4.52389	54.9415	1.24174e-13	2.97885e-12	ENSMUSG00000087687	0.817291	4.28737	70.9455	3.67232e-17	8.92256e-16	ENSMUSG00000032372	-1.42407	4.52158	89.0816	3.7885e-21	9.32867e-20	ENSMUSG00000040462	0.597918	5.9016	76.9419	1.76065e-18	4.39135e-17	ENSMUSG00000045215	-1.95659
ENSMUSG00000037085	0.70894	3.65197	81.8086	1.49927e-19	3.8841e-18	ENSMUSG00000052609	0.596709	4.74392	77.8276	1.12438e-18	2.96107e-17	ENSMUSG00000031936	-2.00361	0.385574	95.2649	1.66541e-22	4.40819e-21	ENSMUSG00000055660	-0.664854	4.70181	87.8	7.24178e-21	1.94787e-19	ENSMUSG00000002908	0.834198	3.82207	54.9279	1.25032e-13	2.99414e-12	ENSMUSG00000079553	1.84848	0.718895	70.8656	3.82402e-17	9.27477e-16	ENSMUSG00000007564	0.484511	7.6313	88.7271	4.53219e-21	1.11402e-19	ENSMUSG00000021263	-3.26976	-0.936595	76.9143	1.78543e-18	4.44531e-17	ENSMUSG00000044734	-1.99329
ENSMUSG00000027655	-0.721585	4.21309	81.7329	1.55778e-19	4.02857e-18	ENSMUSG00000037625	0.846481	6.47154	77.7619	1.16242e-18	3.05585e-17	ENSMUSG00000021226	1.67143	2.64546	95.1955	1.72485e-22	4.55748e-21	ENSMUSG00000024772	0.544078	5.9254	87.3683	9.0083e-21	2.41876e-19	ENSMUSG00000031497	1.49933	2.87628	54.8927	1.27294e-13	3.04294e-12	ENSMUSG00000027597	0.634833	4.33977	70.7695	4.01501e-17	9.72085e-16	ENSMUSG00000025323	0.901862	4.29967	88.2962	5.63515e-21	1.3827e-19	ENSMUSG00000004347	1.1313	6.26671	76.9091	1.79009e-18	4.44906e-17	ENSMUSG00000031503	0.6877
ENSMUSG00000059975	-0.513354	4.30887	81.6519	1.62299e-19	4.18983e-18	ENSMUSG00000051851	0.505722	6.26911	77.6325	1.24109e-18	3.25693e-17	ENSMUSG00000020122	-0.755358	4.6307	95.1686	1.7484e-22	4.6116e-21	ENSMUSG00000078779	-1.03922	2.89047	87.3627	9.03391e-21	2.42137e-19	ENSMUSG00000001761	-0.729331	4.02462	54.8782	1.28234e-13	3.06005e-12	ENSMUSG00000044345	-0.790334	5.11364	70.7266	4.1032e-17	9.9169e-16	ENSMUSG00000039899	-1.85823	5.97479	88.2596	5.74028e-21	1.40601e-19	ENSMUSG00000039096	-1.23188	3.91113	76.9007	1.79774e-18	4.46022e-17	ENSMUSG00000020490	3.97612
ENSMUSG00000029486	0.657678	4.37853	81.1905	2.04971e-19	5.28213e-18	ENSMUSG00000029027	-0.715976	3.06431	77.4788	1.34155e-18	3.51438e-17	ENSMUSG00000020988	0.410141	4.7352	95.1486	1.76616e-22	4.65026e-21	ENSMUSG00000022177	1.04194	2.71558	87.2331	9.64554e-21	2.58077e-19	ENSMUSG00000037016	-1.93731	3.36566	54.8645	1.29132e-13	3.07605e-12	ENSMUSG00000048222	0.835617	4.23303	70.5305	4.53199e-17	1.0934e-15	ENSMUSG00000020630	0.666153	3.30148	88.2288	5.83051e-21	1.42561e-19	ENSMUSG00000054226	-0.665209	3.93365	76.7835	1.90766e-18	4.72463e-17	ENSMUSG00000018750	0.655546
ENSMUSG00000002017	0.408308	5.88327	81.1159	2.1286e-19	5.47584e-18	ENSMUSG00000090000	0.378837	5.37126	77.3667	1.41992e-18	3.71317e-17	ENSMUSG00000089798	-2.89561	-0.559179	94.9216	1.98081e-22	5.20632e-21	ENSMUSG00000078490	1.44296	5.1109	87.0004	1.08497e-20	2.89787e-19	ENSMUSG00000048644	-1.63304	0.0796394	54.7821	1.34661e-13	3.20216e-12	ENSMUSG00000031883	2.33171	1.02615	70.4946	4.61523e-17	1.11154e-15	ENSMUSG00000071342	0.846932	6.00871	88.1751	5.99098e-21	1.46228e-19	ENSMUSG00000033032	-0.906067	6.64741	76.7394	1.95072e-18	4.82282e-17	ENSMUSG00000022408	1.98766
ENSMUSG00000064363	-0.4583	10.6741	81.0297	2.22347e-19	5.70989e-18	ENSMUSG00000027997	0.909764	1.97026	77.3552	1.42821e-18	3.72832e-17	ENSMUSG00000015083	-2.51116	-0.215014	94.8238	2.0811e-22	5.46034e-21	ENSMUSG00000069270	1.41434	0.826129	86.9546	1.11039e-20	2.96058e-19	ENSMUSG00000028708	0.529376	4.88393	54.7539	1.36609e-13	3.24278e-12	ENSMUSG00000018849	-2.21595	1.97654	70.4246	4.78209e-17	1.14971e-15	ENSMUSG00000000532	0.697085	4.86008	88.146	6.07981e-21	1.48137e-19	ENSMUSG00000034872	1.61787	3.68513	76.6058	2.08727e-18	5.1514e-17	ENSMUSG00000032369	-0.897173
ENSMUSG00000029623	0.388046	6.51454	80.9609	2.3023e-19	5.90199e-18	ENSMUSG00000028651	0.587947	3.8114	77.1824	1.55877e-18	4.06205e-17	ENSMUSG00000028601	-1.40355	3.41072	94.595	2.33612e-22	6.11875e-21	ENSMUSG00000020692	0.590172	3.78737	86.5588	1.35644e-20	3.6103e-19	ENSMUSG00000009614	-1.07578	3.21003	54.7458	1.3717e-13	3.25043e-12	ENSMUSG00000030849	-2.08973	1.95215	70.4143	4.80713e-17	1.15371e-15	ENSMUSG00000054237	-0.785646	3.75933	87.8777	6.96308e-21	1.69362e-19	ENSMUSG00000025133	1.01131	6.06735	76.5885	2.10559e-18	5.18754e-17	ENSMUSG00000037519	-0.497753
ENSMUSG00000009079	0.31596	8.20107	80.939	2.32793e-19	5.95731e-18	ENSMUSG00000034063	1.01447	2.42084	77.0604	1.65806e-18	4.31327e-17	ENSMUSG00000021245	-1.20378	4.75243	94.471	2.48707e-22	6.50278e-21	ENSMUSG00000015980	-0.74354	2.94699	86.4376	1.44216e-20	3.83179e-19	ENSMUSG00000042453	-0.908736	3.64961	54.7003	1.40385e-13	3.32081e-12	ENSMUSG00000030666	-3.44628	1.11638	70.3105	5.06674e-17	1.2139e-15	ENSMUSG00000027274	0.593366	4.96973	87.8723	6.9819e-21	1.69524e-19	ENSMUSG00000001151	0.9708	6.81829	76.5514	2.1456e-18	5.27691e-17	ENSMUSG00000031609	-0.999081
ENSMUSG00000055341	-1.33931	0.88894	80.8428	2.44406e-19	6.24362e-18	ENSMUSG00000053080	0.550843	5.74152	76.9962	1.71283e-18	4.448e-17	ENSMUSG00000030868	-0.656453	5.8089	94.4664	2.49294e-22	6.50678e-21	ENSMUSG00000023025	-0.447894	5.75639	86.409	1.46316e-20	3.88081e-19	ENSMUSG00000074623	-1.52485	2.32455	54.5818	1.49113e-13	3.52113e-12	ENSMUSG00000031996	0.681415	9.10729	70.273	5.16386e-17	1.23502e-15	ENSMUSG00000041193	2.33996	5.53546	87.7024	7.60832e-21	1.84412e-19	ENSMUSG00000045625	2.88617	2.35179	76.5144	2.18608e-18	5.36711e-17	ENSMUSG00000024766	-2.9674
ENSMUSG00000035203	-0.403735	7.89065	80.7216	2.59872e-19	6.62718e-18	ENSMUSG00000028470	1.21313	3.66537	76.9922	1.71631e-18	4.44929e-17	ENSMUSG00000018809	-0.557388	3.80277	94.1191	2.97093e-22	7.74091e-21	ENSMUSG00000018196	-0.648299	6.15576	86.3963	1.47258e-20	3.89902e-19	ENSMUSG00000023963	-0.990517	2.7207	54.575	1.49623e-13	3.52706e-12	ENSMUSG00000026027	0.709916	5.9305	70.1905	5.38448e-17	1.28555e-15	ENSMUSG00000049676	-2.20802	-0.342937	87.6625	7.76309e-21	1.87837e-19	ENSMUSG00000078580	0.888076	2.51753	76.4248	2.28756e-18	5.6065e-17	ENSMUSG00000064360	2.68029
ENSMUSG00000028609	0.545546	4.22156	80.6513	2.69274e-19	6.85506e-18	ENSMUSG00000035357	-0.693949	4.6382	76.8642	1.83125e-18	4.73294e-17	ENSMUSG00000022761	0.422179	7.14609	93.7456	3.58791e-22	9.33229e-21	ENSMUSG00000034377	-0.693105	7.08684	86.3724	1.49049e-20	3.9396e-19	ENSMUSG00000049047	0.641481	4.40935	54.5547	1.51179e-13	3.55756e-12	ENSMUSG00000015627	-2.36168	1.60212	70.122	5.57479e-17	1.32867e-15	ENSMUSG00000005237	2.69847	0.99744	87.6145	7.95411e-21	1.92125e-19	ENSMUSG00000068039	-0.555916	7.26897	76.3953	2.32207e-18	5.67258e-17	ENSMUSG00000037012	0.756277
ENSMUSG00000030862	1.0819	2.40466	80.6215	2.73373e-19	6.94737e-18	ENSMUSG00000028514	-0.31437	7.24856	76.8633	1.83206e-18	4.73294e-17	ENSMUSG00000029149	1.34756	0.295297	93.6925	3.68549e-22	9.56952e-21	ENSMUSG00000039518	-3.41374	-0.332986	86.2736	1.56687e-20	4.12879e-19	ENSMUSG00000054203	2.37149	3.32444	54.5023	1.55263e-13	3.64734e-12	ENSMUSG00000002908	1.07779	3.84793	70.0774	5.70235e-17	1.35673e-15	ENSMUSG00000041654	1.51982	2.43901	87.265	9.49143e-21	2.28862e-19	ENSMUSG00000039230	0.832794	4.48827	76.3949	2.32256e-18	5.67258e-17	ENSMUSG00000026858	0.651712
ENSMUSG00000061411	-0.50159	5.72407	80.5909	2.77641e-19	7.04364e-18	ENSMUSG00000079469	-0.748976	4.18419	76.8477	1.8466e-18	4.76225e-17	ENSMUSG00000060794	-4.65801	-0.503349	93.5327	3.99548e-22	1.03565e-20	ENSMUSG00000073411	1.74315	4.78734	86.2728	1.56748e-20	4.12879e-19	ENSMUSG00000021559	-0.625016	5.88981	54.4581	1.58795e-13	3.72388e-12	ENSMUSG00000036667	-0.86337	5.45461	70.0195	5.87206e-17	1.39469e-15	ENSMUSG00000031119	0.789628	4.818	87.2072	9.77294e-21	2.35243e-19	ENSMUSG00000053675	8.49658	3.3951	76.3851	2.33408e-18	5.69088e-17	ENSMUSG00000022809	1.59988
ENSMUSG00000066441	-0.749882	4.87251	80.5719	2.80313e-19	7.09918e-18	ENSMUSG00000025499	-0.45848	5.8388	76.789	1.90238e-18	4.89764e-17	ENSMUSG00000034285	0.403362	6.16392	93.5223	4.01651e-22	1.03931e-20	ENSMUSG00000046994	-0.636458	5.34702	86.23	1.60175e-20	4.21178e-19	ENSMUSG00000039579	2.04856	0.150789	54.3906	1.6435e-13	3.84749e-12	ENSMUSG00000037016	-1.40651	3.56077	69.9905	5.959e-17	1.4129e-15	ENSMUSG00000024845	0.774501	5.94718	87.1153	1.02374e-20	2.45997e-19	ENSMUSG00000001323	-0.885957	4.76435	76.0865	2.71514e-18	6.60155e-17	ENSMUSG00000039110	1.05195
ENSMUSG00000029104	-0.282283	7.92303	80.5628	2.81612e-19	7.1198e-18	ENSMUSG00000071073	-0.587661	4.01853	76.739	1.95111e-18	5.01446e-17	ENSMUSG00000036322	2.47129	0.83549	93.1602	4.82281e-22	1.2458e-20	ENSMUSG00000022978	-1.30863	1.69492	86.1626	1.65736e-20	4.35049e-19	ENSMUSG00000029049	-1.33363	1.10377	54.2607	1.75579e-13	4.1033e-12	ENSMUSG00000026211	0.835142	7.76366	69.9601	6.05159e-17	1.43238e-15	ENSMUSG00000027848	-1.06139	4.50032	87.0694	1.0478e-20	2.51346e-19	ENSMUSG00000030271	1.03514	3.07873	76.0851	2.71694e-18	6.60155e-17	ENSMUSG00000046785	-0.717856
ENSMUSG00000066151	-0.367404	5.84859	80.3717	3.10202e-19	7.82914e-18	ENSMUSG00000021548	0.368725	5.5541	76.5877	2.10645e-18	5.40439e-17	ENSMUSG00000022098	-0.789595	6.39783	93.1536	4.83892e-22	1.24781e-20	ENSMUSG00000018574	0.471211	6.04918	85.9634	1.83301e-20	4.80332e-19	ENSMUSG00000022517	-0.630799	7.61416	54.2495	1.76585e-13	4.1197e-12	ENSMUSG00000058396	-1.81535	3.53599	69.9507	6.08038e-17	1.43673e-15	ENSMUSG00000049091	0.757087	5.4717	86.9962	1.08727e-20	2.60157e-19	ENSMUSG00000031015	0.635792	4.93205	76.0394	2.78068e-18	6.74482e-17	ENSMUSG00000025150	3.89527
ENSMUSG00000050052	-0.5709	3.99338	80.3009	3.21526e-19	8.10103e-18	ENSMUSG00000026888	-0.566816	3.92751	76.5507	2.14634e-18	5.49728e-17	ENSMUSG00000025089	-0.411005	5.32096	93.119	4.92428e-22	1.26764e-20	ENSMUSG00000032763	0.92377	5.7294	85.9264	1.86762e-20	4.88561e-19	ENSMUSG00000054385	1.3889	2.29951	54.239	1.77524e-13	4.13452e-12	ENSMUSG00000032184	-0.883862	3.61555	69.8691	6.33726e-17	1.49485e-15	ENSMUSG00000027861	0.603035	10.2001	86.9944	1.08826e-20	2.60157e-19	ENSMUSG00000049353	3.25432	-0.533524	75.9495	2.91017e-18	7.04682e-17	ENSMUSG00000021690	-0.713344
ENSMUSG00000047897	0.884918	2.07113	80.2819	3.24625e-19	8.16511e-18	ENSMUSG00000078532	0.620163	5.02626	76.4258	2.28647e-18	5.84617e-17	ENSMUSG00000027012	-0.377369	7.08213	92.9831	5.27428e-22	1.35542e-20	ENSMUSG00000029447	0.398518	7.63416	85.8702	1.92144e-20	5.01778e-19	ENSMUSG00000018659	-0.864453	4.11079	54.2171	1.79517e-13	4.17377e-12	ENSMUSG00000042541	0.577134	7.07411	69.8557	6.38052e-17	1.50248e-15	ENSMUSG00000068566	-0.661751	7.44474	86.9676	1.10316e-20	2.63267e-19	ENSMUSG00000030276	-1.6562	1.69137	75.8187	3.10939e-18	7.51632e-17	ENSMUSG00000078868	-2.49776
ENSMUSG00000096210	0.676188	7.00035	80.195	3.39227e-19	8.51779e-18	ENSMUSG00000027935	0.950402	3.04597	76.1981	2.5659e-18	6.5494e-17	ENSMUSG00000032553	-0.483267	5.10143	92.8573	5.62035e-22	1.44188e-20	ENSMUSG00000029471	0.533825	8.28954	85.8631	1.9283e-20	5.0271e-19	ENSMUSG00000035199	0.41036	7.07826	54.2117	1.80013e-13	4.17815e-12	ENSMUSG00000020483	0.791334	9.3539	69.768	6.67077e-17	1.56814e-15	ENSMUSG00000027030	-1.2492	6.54277	86.8663	1.16109e-20	2.76618e-19	ENSMUSG00000029388	0.609923	4.67194	75.7397	3.23639e-18	7.80992e-17	ENSMUSG00000032518	1.10097
ENSMUSG00000051048	1.0939	2.76574	80.1536	3.46404e-19	8.68315e-18	ENSMUSG00000071415	0.348878	7.11891	76.1764	2.59425e-18	6.61047e-17	ENSMUSG00000025158	-0.420947	5.4725	92.5977	6.40815e-22	1.64119e-20	ENSMUSG00000007908	0.603995	4.73129	85.6677	2.1286e-20	5.53981e-19	ENSMUSG00000032245	0.777137	4.51207	54.004	2.00087e-13	4.63614e-12	ENSMUSG00000018263	-1.14706	5.74659	69.7359	6.78022e-17	1.59115e-15	ENSMUSG00000025869	0.599159	3.62398	86.6221	1.31368e-20	3.12436e-19	ENSMUSG00000017929	-1.17918	3.61885	75.7029	3.29716e-18	7.943e-17	ENSMUSG00000037780	-2.25656
ENSMUSG00000060301	-0.713845	4.94674	80.0978	3.56336e-19	8.91691e-18	ENSMUSG00000001583	-2.86816	-0.892507	76.1368	2.64678e-18	6.73284e-17	ENSMUSG00000022119	0.505049	6.61034	92.5409	6.59466e-22	1.68607e-20	ENSMUSG00000039183	0.554335	4.52862	85.5207	2.2929e-20	5.95723e-19	ENSMUSG00000042793	2.0264	5.22992	53.8553	2.15812e-13	4.99198e-12	ENSMUSG00000027601	-0.552046	5.53868	69.7223	6.82682e-17	1.59936e-15	ENSMUSG00000041120	-1.10292	3.92936	86.4894	1.40486e-20	3.33102e-19	ENSMUSG00000027272	0.574496	5.9096	75.6079	3.45983e-18	8.32068e-17	ENSMUSG00000093865	2.6447
ENSMUSG00000031577	0.479976	4.84147	79.9944	3.75468e-19	9.37967e-18	ENSMUSG00000002679	0.473523	4.05019	76.0167	2.81274e-18	7.14282e-17	ENSMUSG00000022864	0.579549	4.01874	92.5146	6.68287e-22	1.70572e-20	ENSMUSG00000051663	1.87417	-0.690856	85.4963	2.32131e-20	6.02079e-19	ENSMUSG00000074865	1.20276	2.51921	53.5607	2.50725e-13	5.78971e-12	ENSMUSG00000042670	-0.60223	5.51489	69.6738	6.99694e-17	1.63643e-15	ENSMUSG00000021175	1.80593	0.753446	86.4887	1.40535e-20	3.33102e-19	ENSMUSG00000032840	-0.761663	4.66151	75.5974	3.47826e-18	8.35078e-17	ENSMUSG00000002043	1.14444
ENSMUSG00000050558	1.12001	3.05016	79.9467	3.84649e-19	9.59271e-18	ENSMUSG00000047155	-0.60359	4.65563	75.7504	3.21881e-18	8.16014e-17	ENSMUSG00000027207	0.575322	4.50146	92.4926	6.75774e-22	1.7219e-20	ENSMUSG00000021368	-0.655224	3.49435	85.4458	2.38144e-20	6.16626e-19	ENSMUSG00000030032	1.44966	1.13316	53.5097	2.57316e-13	5.93182e-12	ENSMUSG00000028396	1.02995	6.5639	69.6651	7.02791e-17	1.63968e-15	ENSMUSG00000006010	0.554483	5.54426	86.1762	1.64597e-20	3.89471e-19	ENSMUSG00000002221	0.560345	4.61929	75.4381	3.77042e-18	9.03685e-17	ENSMUSG00000064307	1.18603
ENSMUSG00000029022	0.789465	3.91923	79.8075	4.12732e-19	1.02756e-17	ENSMUSG00000020171	0.486068	4.79358	75.6826	3.33126e-18	8.43091e-17	ENSMUSG00000022677	0.399382	4.9881	92.487	6.77671e-22	1.72381e-20	ENSMUSG00000023953	0.57503	3.13795	85.3932	2.4456e-20	6.32168e-19	ENSMUSG00000032038	-0.596356	4.94614	53.4145	2.70091e-13	6.21575e-12	ENSMUSG00000044206	-2.67776	2.91373	69.6632	7.03471e-17	1.63968e-15	ENSMUSG00000033486	-1.18111	2.85934	86.1551	1.66365e-20	3.92988e-19	ENSMUSG00000030729	0.805659	4.18833	75.3721	3.89851e-18	9.32801e-17	ENSMUSG00000030532	0.890693
ENSMUSG00000001173	0.277648	6.87285	79.7845	4.17552e-19	1.03775e-17	ENSMUSG00000070348	0.502203	5.3277	75.498	3.65773e-18	9.24149e-17	ENSMUSG00000055371	0.514101	5.14935	92.4755	6.81635e-22	1.73006e-20	ENSMUSG00000022106	0.439268	5.01037	85.2938	2.57164e-20	6.6252e-19	ENSMUSG00000040351	-0.546032	4.64228	53.3879	2.73771e-13	6.28979e-12	ENSMUSG00000103409	1.00941	6.26386	69.6327	7.14433e-17	1.66242e-15	ENSMUSG00000025089	-1.39806	2.94659	86.133	1.68235e-20	3.96732e-19	ENSMUSG00000071342	1.0562	5.88759	75.1902	4.27482e-18	1.02111e-16	ENSMUSG00000027883	-1.66653
ENSMUSG00000025260	0.44772	4.34709	79.7813	4.18236e-19	1.03775e-17	ENSMUSG00000024082	0.382837	4.89939	75.4158	3.81319e-18	9.618e-17	ENSMUSG00000020553	-1.37626	0.966989	92.4732	6.82431e-22	1.73006e-20	ENSMUSG00000040899	-4.64482	-0.455272	85.2938	2.57171e-20	6.6252e-19	ENSMUSG00000025060	0.842826	7.98622	53.3521	2.78812e-13	6.38806e-12	ENSMUSG00000026840	-2.28693	1.77813	69.6211	7.18633e-17	1.66936e-15	ENSMUSG00000078763	-4.56664	-0.496699	86.0725	1.7346e-20	4.08363e-19	ENSMUSG00000001604	0.867475	5.97444	75.1395	4.38605e-18	1.04591e-16	ENSMUSG00000033860	-2.30637
ENSMUSG00000038900	1.25934	6.43787	79.4065	5.05608e-19	1.25242e-17	ENSMUSG00000078442	2.85026	-0.475054	75.3754	3.89214e-18	9.80057e-17	ENSMUSG00000058743	1.16668	1.93668	92.3184	7.37955e-22	1.86766e-20	ENSMUSG00000021339	0.426687	6.56753	85.2301	2.6559e-20	6.83053e-19	ENSMUSG00000022322	1.62049	-0.0310586	53.3509	2.7899e-13	6.38806e-12	ENSMUSG00000043587	-1.04012	3.13017	69.6022	7.25543e-17	1.68258e-15	ENSMUSG00000027875	1.9417	4.58905	85.8757	1.91607e-20	4.50326e-19	ENSMUSG00000026277	0.468577	6.72436	75.1307	4.40553e-18	1.04716e-16	ENSMUSG00000028979	1.83852
ENSMUSG00000041120	-0.586613	5.54877	79.2775	5.39707e-19	1.33464e-17	ENSMUSG00000024645	-0.669177	3.94497	75.3054	4.03259e-18	1.01371e-16	ENSMUSG00000043410	1.4756	1.99484	92.3048	7.43027e-22	1.87733e-20	ENSMUSG00000027950	0.414137	6.63169	85.1566	2.75651e-20	7.07737e-19	ENSMUSG00000022629	-0.806372	4.87094	53.3261	2.82526e-13	6.45815e-12	ENSMUSG00000029101	-0.802869	5.34869	69.4198	7.95876e-17	1.84257e-15	ENSMUSG00000018900	-0.628632	4.68498	85.7731	2.01813e-20	4.73218e-19	ENSMUSG00000021893	-0.513084	5.88701	75.1305	4.40615e-18	1.04716e-16	ENSMUSG00000021612	-1.11992
ENSMUSG00000028378	1.72248	1.7055	79.248	5.47823e-19	1.35243e-17	ENSMUSG00000020061	-1.00897	2.73005	75.1347	4.39674e-18	1.1034e-16	ENSMUSG00000034825	-0.465553	7.84694	92.0168	8.5944e-22	2.16781e-20	ENSMUSG00000043733	0.261344	7.96016	85.0537	2.90376e-20	7.44289e-19	ENSMUSG00000042408	0.645314	4.60637	53.2727	2.90312e-13	6.62497e-12	ENSMUSG00000028528	-2.21304	0.533538	69.3529	8.2331e-17	1.90288e-15	ENSMUSG00000022174	0.737535	5.67585	85.771	2.02027e-20	4.73218e-19	ENSMUSG00000055560	-4.39365	-0.634924	75.1159	4.43873e-18	1.05314e-16	ENSMUSG00000028032	0.760841
ENSMUSG00000019539	-0.951104	1.83956	79.2103	5.58372e-19	1.37616e-17	ENSMUSG00000032854	0.706644	5.9184	74.6675	5.57065e-18	1.39565e-16	ENSMUSG00000029464	0.555863	4.28685	91.9327	8.96728e-22	2.25807e-20	ENSMUSG00000037860	1.11743	1.65609	85.0163	2.95921e-20	7.57231e-19	ENSMUSG00000026678	0.690518	9.39934	53.1955	3.01944e-13	6.87886e-12	ENSMUSG00000046491	-1.42281	2.70955	69.3164	8.38678e-17	1.93515e-15	ENSMUSG00000025766	-0.990777	3.70046	85.6764	2.1193e-20	4.95583e-19	ENSMUSG00000032621	0.485612	5.89918	75.0308	4.63423e-18	1.09767e-16	ENSMUSG00000026175	0.725663
ENSMUSG00000050545	0.913493	3.39822	79.1187	5.84895e-19	1.43912e-17	ENSMUSG00000030982	-0.350787	6.04128	74.5915	5.78914e-18	1.44627e-16	ENSMUSG00000047109	-4.88052	-0.847245	91.602	1.05985e-21	2.66436e-20	ENSMUSG00000026867	-0.318961	6.99115	84.98	3.014e-20	7.69959e-19	ENSMUSG00000022151	0.461529	5.12457	53.1706	3.05801e-13	6.95505e-12	ENSMUSG00000030688	-1.72988	6.42845	69.2878	8.50943e-17	1.96016e-15	ENSMUSG00000016087	0.627352	4.76384	85.5308	2.28115e-20	5.32536e-19	ENSMUSG00000016024	-2.56941	2.72881	75.0226	4.65345e-18	1.10038e-16	ENSMUSG00000025068	1.35263
ENSMUSG00000001016	0.329156	6.44754	79.0265	6.1281e-19	1.50528e-17	ENSMUSG00000069867	2.61853	-0.730068	74.5905	5.79204e-18	1.44627e-16	ENSMUSG00000046008	-6.34001	0.456437	91.5825	1.07034e-21	2.68622e-20	ENSMUSG00000039531	0.558174	4.4488	84.9745	3.02245e-20	7.70826e-19	ENSMUSG00000062300	-0.851541	4.55473	53.1155	3.14502e-13	7.14098e-12	ENSMUSG00000041301	-2.22302	0.987779	69.2575	8.64123e-17	1.98719e-15	ENSMUSG00000038880	1.04107	5.8776	85.4929	2.32532e-20	5.4194e-19	ENSMUSG00000045973	-0.487578	6.05974	74.8602	5.05254e-18	1.19275e-16	ENSMUSG00000026238	0.752659
ENSMUSG00000029361	-0.47224	7.22478	78.9838	6.26226e-19	1.53567e-17	ENSMUSG00000078552	1.73799	1.8772	74.5697	5.85343e-18	1.45915e-16	ENSMUSG00000079084	-0.73746	5.86413	91.5705	1.07688e-21	2.69812e-20	ENSMUSG00000019767	1.66252	1.33417	84.967	3.03386e-20	7.72445e-19	ENSMUSG00000117679	0.696946	4.33551	52.9858	3.35969e-13	7.61566e-12	ENSMUSG00000036391	0.631922	5.0462	69.2253	8.78336e-17	2.01651e-15	ENSMUSG00000039835	1.35751	5.53093	85.4238	2.40809e-20	5.60293e-19	ENSMUSG00000033578	-3.2204	1.38782	74.8271	5.13805e-18	1.21092e-16	ENSMUSG00000027490	1.31886
ENSMUSG00000075595	0.349099	6.69266	78.9432	6.39232e-19	1.56495e-17	ENSMUSG00000096145	1.17533	1.47901	74.5638	5.87109e-18	1.46112e-16	ENSMUSG00000031533	0.483569	4.45171	91.2344	1.27619e-21	3.19218e-20	ENSMUSG00000034285	0.388209	6.14511	84.9474	3.06408e-20	7.78838e-19	ENSMUSG00000061894	-0.946277	3.00449	52.9046	3.50151e-13	7.92391e-12	ENSMUSG00000026235	-1.41421	6.62842	69.163	9.0652e-17	2.07774e-15	ENSMUSG00000027309	0.705834	6.84432	85.3918	2.44738e-20	5.68486e-19	ENSMUSG00000031149	-1.37638	1.87995	74.6984	5.48412e-18	1.29032e-16	ENSMUSG00000049439	-0.755573
ENSMUSG00000040687	-0.280705	8.09336	78.8705	6.63172e-19	1.62085e-17	ENSMUSG00000031849	-1.79524	1.69397	74.4757	6.13895e-18	1.52524e-16	ENSMUSG00000032204	-1.76936	1.59864	91.2249	1.28235e-21	3.20224e-20	ENSMUSG00000046637	1.18262	1.99969	84.8835	3.16477e-20	8.03092e-19	ENSMUSG00000021481	-0.699001	4.5361	52.8341	3.6295e-13	8.19989e-12	ENSMUSG00000040703	-1.97373	3.75222	68.9529	1.00841e-16	2.30743e-15	ENSMUSG00000033318	0.984931	4.24336	85.3227	2.53433e-20	5.87703e-19	ENSMUSG00000036995	1.11515	4.78344	74.6775	5.54238e-18	1.30186e-16	ENSMUSG00000037172	-1.39754
ENSMUSG00000002741	0.329694	6.50351	78.748	7.05613e-19	1.72172e-17	ENSMUSG00000010311	-2.18191	-0.745413	74.4387	6.25502e-18	1.55149e-16	ENSMUSG00000031026	-0.53996	5.75395	91.0841	1.37696e-21	3.43278e-20	ENSMUSG00000033808	-0.375509	5.53553	84.7735	3.34571e-20	8.47599e-19	ENSMUSG00000044345	-0.735933	4.81253	52.7294	3.82821e-13	8.63445e-12	ENSMUSG00000036093	-0.877362	6.37339	68.93	1.02021e-16	2.33055e-15	ENSMUSG00000030048	-6.33443	-0.406536	85.2773	2.59326e-20	6.00371e-19	ENSMUSG00000015536	0.654218	5.30637	74.5705	5.85119e-18	1.37211e-16	ENSMUSG00000053684	0.977044
ENSMUSG00000021572	-1.60322	2.29845	78.729	7.12416e-19	1.73544e-17	ENSMUSG00000039018	-0.810723	4.58281	74.296	6.72391e-18	1.66503e-16	ENSMUSG00000020908	-2.18516	0.655807	90.9493	1.47398e-21	3.66856e-20	ENSMUSG00000020072	1.24954	1.39511	84.7633	3.36315e-20	8.50603e-19	ENSMUSG00000027203	-0.601065	4.2308	52.5609	4.17107e-13	9.39218e-12	ENSMUSG00000047298	1.20591	5.56994	68.8666	1.05353e-16	2.40268e-15	ENSMUSG00000031258	2.04062	1.909	85.2112	2.68142e-20	6.1975e-19	ENSMUSG00000028443	0.688873	4.20792	74.5152	6.01725e-18	1.40871e-16	ENSMUSG00000028788	0.708473
ENSMUSG00000034203	0.368607	4.99917	78.6743	7.32423e-19	1.78122e-17	ENSMUSG00000028295	0.692257	3.03287	74.1258	7.32945e-18	1.81198e-16	ENSMUSG00000004415	-1.24355	2.37083	90.7963	1.59253e-21	3.95706e-20	ENSMUSG00000091764	-0.778224	2.5051	84.7464	3.39189e-20	8.56452e-19	ENSMUSG00000027663	-0.601169	3.56685	52.5276	4.24238e-13	9.53692e-12	ENSMUSG00000022025	-2.84904	-0.544501	68.8335	1.07139e-16	2.43936e-15	ENSMUSG00000065999	-8.34281	0.0542894	85.1173	2.81175e-20	6.48798e-19	ENSMUSG00000035234	0.651202	3.5219	74.4652	6.17152e-18	1.44244e-16	ENSMUSG00000027306	1.7811
ENSMUSG00000058402	-0.679035	4.22835	78.6221	7.5202e-19	1.82586e-17	ENSMUSG00000025650	-1.15352	2.75589	74.1171	7.36195e-18	1.817e-16	ENSMUSG00000068105	1.80514	-0.455146	90.7846	1.60196e-21	3.97391e-20	ENSMUSG00000057181	0.373562	6.52869	84.7421	3.39943e-20	8.56938e-19	ENSMUSG00000025993	-1.39856	4.81738	52.5131	4.27377e-13	9.59162e-12	ENSMUSG00000040455	0.647322	4.67196	68.8115	1.08337e-16	2.46256e-15	ENSMUSG00000069835	1.6363	2.90958	85.0824	2.86192e-20	6.59282e-19	ENSMUSG00000026281	0.701468	4.30928	74.2115	7.01788e-18	1.63754e-16	ENSMUSG00000004945	0.762806
ENSMUSG00000021774	0.32689	6.24669	78.6081	7.57386e-19	1.83585e-17	ENSMUSG00000061477	0.411744	7.38968	74.09	7.46367e-18	1.83907e-16	ENSMUSG00000039253	0.521092	5.27505	90.7466	1.63298e-21	4.04418e-20	ENSMUSG00000041205	0.42399	5.78266	84.7169	3.44292e-20	8.66468e-19	ENSMUSG00000031840	-0.81661	5.31053	52.4987	4.30543e-13	9.64673e-12	ENSMUSG00000030494	-1.72865	3.38011	68.7282	1.13012e-16	2.5646e-15	ENSMUSG00000071656	-1.98683	2.06758	84.996	2.98964e-20	6.87568e-19	ENSMUSG00000029141	0.575835	4.57447	74.0848	7.48322e-18	1.74324e-16	ENSMUSG00000001864	0.802952
ENSMUSG00000022897	-0.375743	6.44615	78.5778	7.69073e-19	1.86111e-17	ENSMUSG00000028865	1.08745	1.34989	74.0091	7.7756e-18	1.91277e-16	ENSMUSG00000060012	-0.622564	6.25255	90.6256	1.73596e-21	4.29213e-20	ENSMUSG00000032606	-0.310389	6.26676	84.5922	3.66704e-20	9.21351e-19	ENSMUSG00000016763	-1.6631	0.937491	52.4644	4.38129e-13	9.80053e-12	ENSMUSG00000041817	2.2759	1.18535	68.712	1.13945e-16	2.58151e-15	ENSMUSG00000042842	-3.11307	4.07547	84.7946	3.31019e-20	7.60035e-19	ENSMUSG00000040795	0.99619	4.1031	73.9392	8.05602e-18	1.87359e-16	ENSMUSG00000038305	-1.42675
ENSMUSG00000032249	0.321492	7.67759	78.5518	7.79297e-19	1.88275e-17	ENSMUSG00000021824	-0.364357	5.80652	73.9654	7.94977e-18	1.9524e-16	ENSMUSG00000020333	-0.279508	8.14746	90.5799	1.77655e-21	4.38528e-20	ENSMUSG00000035559	0.670133	3.62301	84.5607	3.72591e-20	9.34602e-19	ENSMUSG00000028351	2.15692	-0.444629	52.4394	4.4373e-13	9.90949e-12	ENSMUSG00000059456	-1.7818	4.17184	68.7009	1.14587e-16	2.59178e-15	ENSMUSG00000000632	2.12948	-0.0446399	84.7419	3.39974e-20	7.79313e-19	ENSMUSG00000016495	-0.722089	4.83403	73.6556	9.30085e-18	2.15954e-16	ENSMUSG00000036990	-0.671547
ENSMUSG00000062190	-0.378002	6.102	78.4922	8.03143e-19	1.93717e-17	ENSMUSG00000031600	-0.583743	6.55237	73.9458	8.02912e-18	1.96865e-16	ENSMUSG00000032667	-0.758253	4.83358	90.557	1.79722e-21	4.429e-20	ENSMUSG00000026102	-0.400497	5.31987	84.3275	4.19234e-20	1.04987e-18	ENSMUSG00000057716	-2.02823	0.0614089	52.3703	4.59615e-13	1.02474e-11	ENSMUSG00000056260	0.709483	4.58276	68.5786	1.21921e-16	2.75314e-15	ENSMUSG00000044938	1.04993	7.28505	84.6935	3.48395e-20	7.97305e-19	ENSMUSG00000007039	-0.990669	4.58661	73.5978	9.57714e-18	2.22004e-16	ENSMUSG00000006715	-1.36656
ENSMUSG00000033845	0.489782	4.79709	78.4426	8.2356e-19	1.98316e-17	ENSMUSG00000037752	-0.908259	2.72663	73.9097	8.17741e-18	2.00172e-16	ENSMUSG00000026707	0.644284	3.16012	90.3039	2.0425e-21	5.02523e-20	ENSMUSG00000042302	-0.296136	6.34503	84.2573	4.34396e-20	1.08606e-18	ENSMUSG00000027296	-1.71079	-0.618482	52.2596	4.86288e-13	1.08243e-11	ENSMUSG00000017778	0.737461	8.853	68.4811	1.28098e-16	2.88787e-15	ENSMUSG00000015217	0.631698	5.74344	84.6402	3.57916e-20	8.1775e-19	ENSMUSG00000024471	2.30015	5.92962	73.483	1.01506e-17	2.34911e-16	ENSMUSG00000049670	1.11447
ENSMUSG00000032336	-0.255978	8.96877	78.4392	8.25001e-19	1.98338e-17	ENSMUSG00000075376	-0.626216	6.66186	73.8799	8.3016e-18	2.0288e-16	ENSMUSG00000034157	-0.437128	6.65529	90.0818	2.2852e-21	5.60458e-20	ENSMUSG00000031258	1.04907	1.83935	84.2474	4.36576e-20	1.08972e-18	ENSMUSG00000047502	-2.21076	-0.318593	52.1568	5.12412e-13	1.13871e-11	ENSMUSG00000063383	-2.34396	-0.354438	68.4733	1.28604e-16	2.89455e-15	ENSMUSG00000028883	-1.86935	2.85643	84.4725	3.89588e-20	8.88657e-19	ENSMUSG00000026649	-3.72235	-0.621568	73.4077	1.05455e-17	2.43651e-16	ENSMUSG00000002769	1.23482
ENSMUSG00000103770	0.957232	2.71831	78.3931	8.44474e-19	2.02688e-17	ENSMUSG00000067194	0.40239	7.97156	73.7219	8.99373e-18	2.19435e-16	ENSMUSG00000003354	-0.898587	2.36567	90.0815	2.28545e-21	5.60458e-20	ENSMUSG00000036046	-0.499331	7.31687	84.1428	4.60291e-20	1.14704e-18	ENSMUSG00000020956	-0.985947	2.35353	52.1338	5.18448e-13	1.15024e-11	ENSMUSG00000035232	-1.45335	2.34339	68.4624	1.29323e-16	2.90596e-15	ENSMUSG00000029061	-1.66008	3.27578	84.4182	4.0044e-20	9.11917e-19	ENSMUSG00000019841	0.838804	5.13717	73.3907	1.06368e-17	2.45358e-16	ENSMUSG00000056174	1.64083
ENSMUSG00000019952	-0.631783	2.79038	78.3373	8.68652e-19	2.0815e-17	ENSMUSG00000037361	0.389671	5.24514	73.6723	9.22239e-18	2.24647e-16	ENSMUSG00000002057	3.21398	-0.90508	89.6114	2.8985e-21	7.08683e-20	ENSMUSG00000027804	-0.388047	6.15364	83.9381	5.10506e-20	1.2701e-18	ENSMUSG00000053768	0.46025	8.33433	52.1147	5.23515e-13	1.15959e-11	ENSMUSG00000032348	-0.702883	5.77666	68.4161	1.32395e-16	2.97015e-15	ENSMUSG00000043602	1.05684	3.77847	84.3085	4.23291e-20	9.62383e-19	ENSMUSG00000071266	1.17785	3.44839	73.2928	1.11776e-17	2.57412e-16	ENSMUSG00000036169	-1.23027
ENSMUSG00000047888	-0.347073	7.51352	78.308	8.81656e-19	2.10922e-17	ENSMUSG00000024925	0.699695	4.06969	73.4725	1.02047e-17	2.48171e-16	ENSMUSG00000022817	-0.556812	5.43937	89.6108	2.89933e-21	7.08683e-20	ENSMUSG00000037224	0.543199	6.40391	83.9061	5.18851e-20	1.28876e-18	ENSMUSG00000031760	-3.84413	0.788262	52.0256	5.47815e-13	1.21144e-11	ENSMUSG00000017718	-1.50907	0.334914	68.2855	1.41459e-16	3.16831e-15	ENSMUSG00000021478	3.81619	1.45675	84.2894	4.27395e-20	9.69566e-19	ENSMUSG00000032959	-0.848878	7.13264	73.2169	1.16156e-17	2.67065e-16	ENSMUSG00000025981	-0.859714
ENSMUSG00000049112	-1.09891	2.79395	78.0977	9.80682e-19	2.33926e-17	ENSMUSG00000094076	1.68134	-0.140809	73.4397	1.03758e-17	2.51921e-16	ENSMUSG00000029676	-0.725039	4.10415	89.6021	2.91221e-21	7.10674e-20	ENSMUSG00000023913	-1.06735	6.74174	83.8211	5.41648e-20	1.3432e-18	ENSMUSG00000038764	0.762239	6.05348	51.9541	5.68127e-13	1.25431e-11	ENSMUSG00000022629	-0.827283	4.71951	68.1938	1.48189e-16	3.31365e-15	ENSMUSG00000001847	-0.592694	7.34778	84.2874	4.27842e-20	9.69566e-19	ENSMUSG00000024948	0.693328	6.42008	73.1625	1.19401e-17	2.74078e-16	ENSMUSG00000034042	0.815158
ENSMUSG00000029512	-0.409101	6.55578	78.0971	9.80995e-19	2.33926e-17	ENSMUSG00000079598	-0.654912	5.10151	73.4302	1.0426e-17	2.52729e-16	ENSMUSG00000029763	0.385144	6.519	89.531	3.01871e-21	7.35468e-20	ENSMUSG00000050050	1.27791	0.408257	83.705	5.74387e-20	1.42207e-18	ENSMUSG00000025271	-1.14182	3.24729	51.942	5.71643e-13	1.26003e-11	ENSMUSG00000025142	0.637182	4.79109	68.1513	1.51423e-16	3.37501e-15	ENSMUSG00000001403	-1.79458	0.682956	84.1298	4.63328e-20	1.04828e-18	ENSMUSG00000030805	0.664297	6.50242	72.8871	1.37283e-17	3.14615e-16	ENSMUSG00000030364	2.2569
ENSMUSG00000021824	-0.432311	5.78241	78.0204	1.01979e-18	2.42784e-17	ENSMUSG00000042632	-0.720094	4.16499	73.3512	1.08516e-17	2.6262e-16	ENSMUSG00000015342	-0.924182	4.81211	89.4776	3.10126e-21	7.54355e-20	ENSMUSG00000090213	-0.521592	4.30176	83.2875	7.09455e-20	1.75363e-18	ENSMUSG00000043300	0.852179	2.89378	51.8574	5.96809e-13	1.31337e-11	ENSMUSG00000018666	0.50864	5.70731	68.1512	1.51424e-16	3.37501e-15	ENSMUSG00000029388	0.502733	4.66065	84.0941	4.7177e-20	1.06565e-18	ENSMUSG00000022181	3.35216	1.55851	72.7557	1.46732e-17	3.35724e-16	ENSMUSG00000032640	-0.908569
ENSMUSG00000041415	-0.33338	6.8837	77.8863	1.09147e-18	2.59428e-17	ENSMUSG00000028010	0.576629	4.02831	73.2854	1.12192e-17	2.71077e-16	ENSMUSG00000031984	-0.499355	4.45328	89.4053	3.21675e-21	7.81182e-20	ENSMUSG00000030858	3.19074	-1.13201	83.2168	7.35301e-20	1.81458e-18	ENSMUSG00000028675	0.617572	6.06523	51.8394	6.02301e-13	1.32331e-11	ENSMUSG00000046020	-0.518661	5.22534	68.1478	1.51688e-16	3.37543e-15	ENSMUSG00000043541	-2.84152	-0.022262	84.0251	4.88522e-20	1.1017e-18	ENSMUSG00000028841	1.61229	3.16861	72.7371	1.48122e-17	3.38355e-16	ENSMUSG00000037622	0.830262
ENSMUSG00000090093	1.82877	1.28379	77.7478	1.17074e-18	2.77818e-17	ENSMUSG00000050860	1.29091	1.16999	73.1655	1.19219e-17	2.87589e-16	ENSMUSG00000029199	0.499533	5.10374	89.3751	3.26623e-21	7.91916e-20	ENSMUSG00000062270	-0.521443	8.02724	83.1633	7.55472e-20	1.86134e-18	ENSMUSG00000093930	0.599382	6.00802	51.7743	6.22622e-13	1.36575e-11	ENSMUSG00000024594	-0.53287	5.42944	68.1272	1.53283e-16	3.40541e-15	ENSMUSG00000007122	3.97259	4.47119	83.9919	4.96799e-20	1.11856e-18	ENSMUSG00000031196	1.41961	2.35113	72.531	1.64425e-17	3.74989e-16	ENSMUSG00000121596	-1.11003
ENSMUSG00000044155	0.456874	4.46784	77.6736	1.21553e-18	2.87982e-17	ENSMUSG00000020019	-0.641449	4.54173	73.1245	1.21724e-17	2.93158e-16	ENSMUSG00000033405	-1.13026	1.29194	89.2996	3.39334e-21	8.21407e-20	ENSMUSG00000075705	0.672339	4.07752	83.1435	7.63075e-20	1.87704e-18	ENSMUSG00000008373	0.523899	4.91347	51.6518	6.62697e-13	1.45131e-11	ENSMUSG00000021866	-0.574176	6.61802	68.1138	1.54328e-16	3.42309e-15	ENSMUSG00000029471	0.788362	4.36241	83.7669	5.56702e-20	1.25141e-18	ENSMUSG00000026586	1.077	6.21695	72.5195	1.6539e-17	3.76583e-16	ENSMUSG00000026042	2.54646
ENSMUSG00000034453	0.422467	4.80149	77.6601	1.2239e-18	2.89499e-17	ENSMUSG00000022897	-0.446585	6.45889	73.1079	1.22754e-17	2.95163e-16	ENSMUSG00000012117	0.433418	6.05172	89.2478	3.48335e-21	8.41838e-20	ENSMUSG00000035878	-1.62083	2.53442	83.0657	7.93692e-20	1.94921e-18	ENSMUSG00000067889	1.23566	0.72291	51.6104	6.76838e-13	1.47989e-11	ENSMUSG00000020523	0.574541	5.77644	68.0502	1.59383e-16	3.52952e-15	ENSMUSG00000033082	1.24094	4.80871	83.728	5.67764e-20	1.27422e-18	ENSMUSG00000040952	-1.01438	6.75149	72.4589	1.70549e-17	3.87704e-16	ENSMUSG00000034258	1.23671
ENSMUSG00000072694	-0.418029	5.94156	77.5835	1.2723e-18	3.00464e-17	ENSMUSG00000030124	-1.4722	0.213381	73.0652	1.25434e-17	3.01123e-16	ENSMUSG00000034473	0.574888	4.05207	89.1992	3.5699e-21	8.61367e-20	ENSMUSG00000039632	1.00671	2.87372	83.0105	8.162e-20	2.00127e-18	ENSMUSG00000038178	0.848858	4.87507	51.5938	6.8258e-13	1.49004e-11	ENSMUSG00000020389	-1.05974	2.07547	67.9712	1.65901e-16	3.66536e-15	ENSMUSG00000015981	-1.94109	0.489318	83.6623	5.86932e-20	1.31512e-18	ENSMUSG00000073987	-0.834694	3.68725	72.4332	1.72784e-17	3.92152e-16	ENSMUSG00000029073	-1.05081
ENSMUSG00000103897	0.934788	3.57491	77.5374	1.30232e-18	3.0706e-17	ENSMUSG00000017670	-0.296275	7.50146	73.0254	1.27992e-17	3.06769e-16	ENSMUSG00000063450	1.18486	6.2319	89.1799	3.60496e-21	8.68431e-20	ENSMUSG00000022696	-0.685655	5.34984	82.9936	8.23207e-20	2.0152e-18	ENSMUSG00000022865	0.880195	6.85731	51.5092	7.1264e-13	1.55317e-11	ENSMUSG00000025216	2.3021	-0.683353	67.9694	1.6605e-16	3.66536e-15	ENSMUSG00000027579	2.12672	-0.0342455	83.4641	6.4883e-20	1.45148e-18	ENSMUSG00000031683	0.765696	4.84649	72.3258	1.82445e-17	4.13415e-16	ENSMUSG00000079042	-1.02115
ENSMUSG00000049957	-0.49994	4.66365	77.497	1.32927e-18	3.1291e-17	ENSMUSG00000002741	0.30397	6.50838	72.9065	1.35937e-17	3.2529e-16	ENSMUSG00000020315	-0.295263	10.2324	89.1744	3.61504e-21	8.69463e-20	ENSMUSG00000110218	-1.84532	1.79564	82.8355	8.91739e-20	2.17947e-18	ENSMUSG00000019923	-0.519051	5.4613	51.4858	7.21161e-13	1.56922e-11	ENSMUSG00000038777	-1.39055	3.20878	67.8727	1.74395e-16	3.8434e-15	ENSMUSG00000022912	-0.73813	4.87708	83.2532	7.2189e-20	1.61234e-18	ENSMUSG00000035126	-2.20667	0.70276	72.2859	1.8617e-17	4.2118e-16	ENSMUSG00000049630	-2.10711
ENSMUSG00000014075	0.650363	3.72813	77.4719	1.34627e-18	3.16406e-17	ENSMUSG00000024325	0.693744	5.15646	72.8379	1.40745e-17	3.36257e-16	ENSMUSG00000035493	0.919785	2.60733	89.1346	3.6884e-21	8.85688e-20	ENSMUSG00000045010	2.28049	0.671662	82.6963	9.56785e-20	2.33471e-18	ENSMUSG00000020706	0.457729	5.26761	51.4498	7.34526e-13	1.59574e-11	ENSMUSG00000031537	-0.576277	5.3409	67.7411	1.86436e-16	4.10219e-15	ENSMUSG00000044005	1.37463	0.396983	83.1067	7.774e-20	1.73354e-18	ENSMUSG00000063558	-2.38452	5.7924	72.2458	1.89995e-17	4.29146e-16	ENSMUSG00000017009	1.03941
ENSMUSG00000036430	0.642156	3.95295	77.448	1.36261e-18	3.19734e-17	ENSMUSG00000011382	-1.13612	3.68358	72.7851	1.44566e-17	3.44833e-16	ENSMUSG00000023960	-0.350841	8.27387	89.1308	3.69543e-21	8.8596e-20	ENSMUSG00000054474	1.47201	2.42628	82.6778	9.65785e-20	2.3529e-18	ENSMUSG00000037300	0.428427	4.48434	51.4131	7.4836e-13	1.6232e-11	ENSMUSG00000036751	0.705931	9.58092	67.6307	1.97176e-16	4.33157e-15	ENSMUSG00000021188	-0.605483	6.59892	83.0575	7.97016e-20	1.77444e-18	ENSMUSG00000092074	-4.00352	-0.0699126	72.1802	1.96413e-17	4.42591e-16	ENSMUSG00000037664	1.39013
ENSMUSG00000017404	0.430724	7.15209	77.4016	1.395e-18	3.26813e-17	ENSMUSG00000041920	0.454721	4.70669	72.7768	1.45176e-17	3.45737e-16	ENSMUSG00000047714	-0.507966	6.5474	88.969	4.01052e-21	9.59966e-20	ENSMUSG00000056763	-0.588877	5.69768	82.6426	9.83152e-20	2.39139e-18	ENSMUSG00000041633	0.813154	4.45365	51.3959	7.54961e-13	1.63491e-11	ENSMUSG00000024440	1.10387	5.08771	67.6084	1.99413e-16	4.37373e-15	ENSMUSG00000022221	-1.42128	1.11942	83.049	8.00446e-20	1.77924e-18	ENSMUSG00000029772	0.705693	5.12858	72.1786	1.96575e-17	4.42591e-16	ENSMUSG00000037361	0.633422
ENSMUSG00000021548	0.393717	5.50394	77.3949	1.39976e-18	3.27405e-17	ENSMUSG00000074754	0.568797	3.55422	72.6794	1.52516e-17	3.62638e-16	ENSMUSG00000037196	-1.04419	3.18431	88.8912	4.17132e-21	9.96865e-20	ENSMUSG00000027071	-2.21949	0.647307	82.5734	1.01819e-19	2.47267e-18	ENSMUSG00000010529	2.15201	-0.8238	51.3538	7.71306e-13	1.66764e-11	ENSMUSG00000041845	-1.08486	2.014	67.5682	2.03521e-16	4.45673e-15	ENSMUSG00000033032	-0.7924	6.56711	83.0429	8.02902e-20	1.78185e-18	ENSMUSG00000043885	-0.586786	4.53723	71.8697	2.29882e-17	5.16759e-16	ENSMUSG00000032288	-0.678246
ENSMUSG00000073616	0.493672	5.41442	77.3528	1.4299e-18	3.33924e-17	ENSMUSG00000060126	0.420964	8.34156	72.6548	1.54431e-17	3.66608e-16	ENSMUSG00000072919	-2.1027	0.457503	88.7814	4.4095e-21	1.05211e-19	ENSMUSG00000063564	-1.20432	4.40174	82.5679	1.021e-19	2.47555e-18	ENSMUSG00000021000	0.571636	6.50551	51.2516	8.1256e-13	1.75405e-11	ENSMUSG00000060206	-0.903725	4.11974	67.5294	2.0757e-16	4.53817e-15	ENSMUSG00000020864	-0.539455	7.31709	83.0385	8.04694e-20	1.78299e-18	ENSMUSG00000025094	-2.23133	-0.0598314	71.8485	2.32366e-17	5.21513e-16	ENSMUSG00000003848	-0.805462
ENSMUSG00000019808	0.727464	2.69469	77.3251	1.45011e-18	3.38107e-17	ENSMUSG00000027546	-0.295626	8.53301	72.6489	1.54896e-17	3.67127e-16	ENSMUSG00000025176	1.78789	1.31574	88.7521	4.47523e-21	1.0661e-19	ENSMUSG00000041939	0.514376	4.1888	82.3482	1.14104e-19	2.76223e-18	ENSMUSG00000040658	1.53679	0.855676	51.1965	8.35681e-13	1.80038e-11	ENSMUSG00000035199	0.516974	7.05284	67.5106	2.09555e-16	4.57428e-15	ENSMUSG00000022195	0.625848	4.65574	82.8692	8.76658e-20	1.93936e-18	ENSMUSG00000002329	0.819184	6.19178	71.7547	2.43686e-17	5.46051e-16	ENSMUSG00000040148	2.63368
ENSMUSG00000024668	0.393534	5.28273	77.1411	1.59169e-18	3.70529e-17	ENSMUSG00000050211	-0.665023	5.56166	72.4169	1.7422e-17	4.12274e-16	ENSMUSG00000020280	0.97794	4.59125	88.7127	4.56519e-21	1.08515e-19	ENSMUSG00000030209	-0.676509	8.73255	82.229	1.21196e-19	2.92925e-18	ENSMUSG00000041488	0.966231	3.45327	51.1942	8.36675e-13	1.80038e-11	ENSMUSG00000091474	1.21719	4.5119	67.4847	2.12326e-16	4.62743e-15	ENSMUSG00000020431	-2.56096	3.14233	82.6763	9.66548e-20	2.13483e-18	ENSMUSG00000024818	-1.26436	2.83983	71.7108	2.49171e-17	5.57455e-16	ENSMUSG00000051043	0.837808
ENSMUSG00000025735	1.19017	1.49331	76.9538	1.75008e-18	4.06755e-17	ENSMUSG00000050063	1.92508	3.4714	72.231	1.91423e-17	4.52268e-16	ENSMUSG00000030770	-0.418881	6.4999	88.7108	4.56967e-21	1.08515e-19	ENSMUSG00000043903	-0.922143	2.3023	82.1678	1.25007e-19	3.0166e-18	ENSMUSG00000015950	1.18948	3.78072	51.1709	8.46633e-13	1.81892e-11	ENSMUSG00000041540	-1.27367	2.26958	67.215	2.43454e-16	5.29743e-15	ENSMUSG00000040829	1.11744	3.11318	82.5365	1.03734e-19	2.28638e-18	ENSMUSG00000062995	-1.34004	3.62515	71.5772	2.66617e-17	5.95543e-16	ENSMUSG00000046546	0.938287
ENSMUSG00000031691	0.374097	7.93663	76.9267	1.77425e-18	4.11598e-17	ENSMUSG00000033233	0.654225	3.63455	72.2211	1.92389e-17	4.53831e-16	ENSMUSG00000069920	-1.69359	1.85004	88.6703	4.66404e-21	1.10581e-19	ENSMUSG00000029075	-2.39453	-0.0724738	82.0595	1.32048e-19	3.18146e-18	ENSMUSG00000026778	-1.75189	2.43877	51.0748	8.89111e-13	1.90716e-11	ENSMUSG00000021646	0.789166	6.17545	67.2	2.45315e-16	5.32951e-15	ENSMUSG00000028576	1.40724	2.70478	82.5345	1.03844e-19	2.28638e-18	ENSMUSG00000034127	-3.13882	1.8253	71.5553	2.69594e-17	6.01044e-16	ENSMUSG00000095098	0.771705
ENSMUSG00000025008	-0.495875	4.1005	76.9241	1.77652e-18	4.11598e-17	ENSMUSG00000053128	-0.871245	2.00098	72.1818	1.96258e-17	4.62228e-16	ENSMUSG00000028145	0.467024	4.23248	88.6109	4.80635e-21	1.13775e-19	ENSMUSG00000026494	-0.694324	5.53089	82.029	1.34104e-19	3.22589e-18	ENSMUSG00000037979	-1.6644	0.885053	51.061	8.95395e-13	1.91761e-11	ENSMUSG00000020183	-1.69353	1.72169	67.1956	2.45863e-16	5.33299e-15	ENSMUSG00000026170	0.981129	4.92861	82.4536	1.08177e-19	2.37803e-18	ENSMUSG00000060512	-4.27107	0.973893	71.5528	2.69931e-17	6.01044e-16	ENSMUSG00000050545	1.65848
ENSMUSG00000025283	0.595361	5.68287	76.8513	1.84329e-18	4.26396e-17	ENSMUSG00000020462	0.420975	6.4983	72.0774	2.06918e-17	4.86566e-16	ENSMUSG00000079036	0.450027	4.40645	88.5659	4.91697e-21	1.16211e-19	ENSMUSG00000026012	-2.31497	-0.847346	82.0136	1.35155e-19	3.24607e-18	ENSMUSG00000047250	-1.27176	4.02137	51.0519	8.9958e-13	1.92354e-11	ENSMUSG00000026678	1.04181	9.32525	67.1357	2.53442e-16	5.48872e-15	ENSMUSG00000027787	0.650916	4.68237	82.3354	1.14844e-19	2.52061e-18	ENSMUSG00000026011	-5.53552	2.34318	71.5366	2.72159e-17	6.0505e-16	ENSMUSG00000032548	0.898998
ENSMUSG00000030330	1.20975	1.26724	76.8385	1.85523e-18	4.28482e-17	ENSMUSG00000029001	0.467995	6.19424	72.0602	2.0873e-17	4.90056e-16	ENSMUSG00000063564	-1.27276	4.30856	88.4628	5.17988e-21	1.22232e-19	ENSMUSG00000038775	1.91757	1.57358	81.9554	1.39191e-19	3.33773e-18	ENSMUSG00000028139	-1.99482	-0.907419	51.0381	9.05892e-13	1.93399e-11	ENSMUSG00000036782	-0.7968	4.91231	67.1032	2.57665e-16	5.57141e-15	ENSMUSG00000036160	0.682878	4.21377	82.2933	1.17321e-19	2.57092e-18	ENSMUSG00000047045	-1.00188	5.34629	71.5318	2.72827e-17	6.05582e-16	ENSMUSG00000031787	0.981268
ENSMUSG00000030717	-0.860426	2.28908	76.7367	1.95339e-18	4.50445e-17	ENSMUSG00000042079	0.428297	5.41535	72.0341	2.11507e-17	4.95797e-16	ENSMUSG00000032363	1.52369	0.472022	88.3878	5.3802e-21	1.2676e-19	ENSMUSG00000040327	0.343547	6.66558	81.8166	1.49317e-19	3.57493e-18	ENSMUSG00000035399	0.609706	3.24156	51.033	9.08247e-13	1.93598e-11	ENSMUSG00000018604	1.01234	3.78874	66.9366	2.80387e-16	6.05319e-15	ENSMUSG00000045658	-0.941781	3.6491	82.1202	1.2806e-19	2.80184e-18	ENSMUSG00000021094	1.14696	5.50625	71.3548	2.9843e-17	6.61372e-16	ENSMUSG00000025158	-0.741923
ENSMUSG00000002345	0.530673	4.08576	76.538	2.16014e-18	4.97339e-17	ENSMUSG00000019302	-0.272611	8.86772	71.986	2.16725e-17	5.07231e-16	ENSMUSG00000025777	0.376968	7.71228	88.3002	5.62389e-21	1.32294e-19	ENSMUSG00000031266	0.472786	4.14881	81.7953	1.50938e-19	3.60808e-18	ENSMUSG00000033526	0.619497	6.97849	51.0179	9.15282e-13	1.94792e-11	ENSMUSG00000055553	0.57911	5.67	66.8588	2.91669e-16	6.28689e-15	ENSMUSG00000015536	0.625958	5.30217	82.1096	1.28744e-19	2.81238e-18	ENSMUSG00000011658	0.823593	4.49007	71.3281	3.0249e-17	6.69319e-16	ENSMUSG00000046312	1.00768
ENSMUSG00000017007	-2.39118	-0.131568	76.4884	2.21513e-18	5.09203e-17	ENSMUSG00000005628	-1.94352	0.379182	71.9545	2.20213e-17	5.14589e-16	ENSMUSG00000098022	1.54912	0.13337	88.2732	5.70109e-21	1.339e-19	ENSMUSG00000030302	-0.45299	9.4577	81.7695	1.52923e-19	3.64981e-18	ENSMUSG00000029095	-0.776307	4.79194	50.9923	9.27267e-13	1.97033e-11	ENSMUSG00000035845	0.714377	3.8394	66.8053	2.99686e-16	6.44957e-15	ENSMUSG00000026274	1.15276	0.88172	82.0826	1.30517e-19	2.84665e-18	ENSMUSG00000023764	-1.35086	4.22812	71.2455	3.15436e-17	6.96872e-16	ENSMUSG00000020911	1.3153
ENSMUSG00000003762	0.556051	4.73785	76.4719	2.23373e-18	5.12676e-17	ENSMUSG00000045319	1.66555	3.72367	71.9427	2.21535e-17	5.16868e-16	ENSMUSG00000046312	0.437892	5.45047	88.1799	5.97644e-21	1.40148e-19	ENSMUSG00000078919	-0.477614	4.1547	81.6584	1.61765e-19	3.85481e-18	ENSMUSG00000024978	0.616423	8.44364	50.9154	9.64322e-13	2.04456e-11	ENSMUSG00000022987	0.865148	4.08468	66.8012	3.00313e-16	6.45298e-15	ENSMUSG00000036639	1.27265	2.19418	82.0438	1.33102e-19	2.8985e-18	ENSMUSG00000015981	-1.73548	0.65331	71.1486	3.31311e-17	7.308e-16	ENSMUSG00000070738	-0.581532
ENSMUSG00000031816	-0.587074	4.69606	76.4463	2.26289e-18	5.18557e-17	ENSMUSG00000061046	0.511014	6.48284	71.837	2.33724e-17	5.44457e-16	ENSMUSG00000020986	0.425627	6.95691	88.1476	6.07486e-21	1.42233e-19	ENSMUSG00000031916	0.506056	4.55399	81.5902	1.67446e-19	3.98396e-18	ENSMUSG00000020577	0.582258	5.88359	50.9136	9.6521e-13	2.04456e-11	ENSMUSG00000047843	-0.957467	5.40951	66.768	3.0542e-16	6.54652e-15	ENSMUSG00000029213	-0.59795	4.92165	81.989	1.36844e-19	2.97534e-18	ENSMUSG00000045962	0.645325	9.55359	71.0715	3.44507e-17	7.58721e-16	ENSMUSG00000031201	-0.65752
ENSMUSG00000035885	0.368601	7.95377	76.3984	2.31837e-18	5.30445e-17	ENSMUSG00000033032	-0.682243	3.93368	71.8267	2.34956e-17	5.46474e-16	ENSMUSG00000020668	-0.357989	8.01685	88.0454	6.39677e-21	1.49537e-19	ENSMUSG00000117145	2.28	-1.31198	81.3649	1.87662e-19	4.45799e-18	ENSMUSG00000040605	-1.03374	4.18556	50.7735	1.03666e-12	2.19249e-11	ENSMUSG00000053414	-1.66793	0.536248	66.7667	3.05618e-16	6.54652e-15	ENSMUSG00000057841	-0.74168	7.32262	81.9407	1.40233e-19	3.04428e-18	ENSMUSG00000017176	-0.64618	4.32363	70.97	3.62705e-17	7.97556e-16	ENSMUSG00000069117	-1.09052
ENSMUSG00000061353	0.846156	6.34686	76.3837	2.33566e-18	5.33304e-17	ENSMUSG00000026926	-0.309726	6.49447	71.7911	2.3923e-17	5.5555e-16	ENSMUSG00000000149	-0.489952	6.52956	87.9125	6.84154e-21	1.59686e-19	ENSMUSG00000028167	1.53057	2.12036	81.3193	1.92043e-19	4.55497e-18	ENSMUSG00000015023	0.51921	4.73754	50.766	1.04062e-12	2.19744e-11	ENSMUSG00000033152	0.758284	4.20519	66.7289	3.1153e-16	6.66277e-15	ENSMUSG00000030666	-7.05948	-0.297454	81.9034	1.42902e-19	3.0974e-18	ENSMUSG00000025580	-0.522146	5.13947	70.9613	3.64309e-17	7.99836e-16	ENSMUSG00000030553	-2.03619
ENSMUSG00000048758	1.35729	6.24055	76.3817	2.33813e-18	5.33304e-17	ENSMUSG00000029430	0.288097	7.34625	71.7361	2.45996e-17	5.70374e-16	ENSMUSG00000037649	0.908564	3.84178	87.8755	6.97082e-21	1.6245e-19	ENSMUSG00000040287	-1.84938	1.27063	81.2032	2.03658e-19	4.82296e-18	ENSMUSG00000002900	-0.505955	6.94312	50.6848	1.08457e-12	2.28404e-11	ENSMUSG00000028788	0.484652	8.39194	66.7245	3.12235e-16	6.66747e-15	ENSMUSG00000053702	0.640905	9.0212	81.5518	1.70726e-19	3.69472e-18	ENSMUSG00000071656	-2.14828	2.53193	70.8986	3.76067e-17	8.24368e-16	ENSMUSG00000041957	0.573361
ENSMUSG00000038213	-0.709193	2.54215	76.23	2.52482e-18	5.74994e-17	ENSMUSG00000036249	-0.60854	4.15667	71.7203	2.47967e-17	5.74054e-16	ENSMUSG00000024169	0.535299	5.39023	87.8464	7.07402e-21	1.646e-19	ENSMUSG00000040033	0.562762	5.72481	80.9337	2.33415e-19	5.51909e-18	ENSMUSG00000073755	1.04082	4.35765	50.684	1.08499e-12	2.28404e-11	ENSMUSG00000031311	-0.438257	6.34547	66.6709	3.20836e-16	6.84052e-15	ENSMUSG00000034445	-0.577535	4.02351	81.5044	1.74871e-19	3.77858e-18	ENSMUSG00000038936	-0.709097	6.24155	70.7806	3.99253e-17	8.73838e-16	ENSMUSG00000068205	1.39907
ENSMUSG00000019897	-0.608874	4.43001	76.2014	2.56154e-18	5.81885e-17	ENSMUSG00000019945	-1.18898	0.710364	71.6999	2.50551e-17	5.79138e-16	ENSMUSG00000001525	-0.382097	8.28573	87.784	7.30064e-21	1.6961e-19	ENSMUSG00000027962	0.507685	5.14642	80.8802	2.39823e-19	5.66182e-18	ENSMUSG00000038801	-1.66414	3.78478	50.6288	1.11595e-12	2.34558e-11	ENSMUSG00000027247	-0.842728	5.1081	66.6249	3.28416e-16	6.99129e-15	ENSMUSG00000026239	0.770381	5.0138	81.2998	1.93951e-19	4.18435e-18	ENSMUSG00000026616	3.92972	4.04773	70.7363	4.08301e-17	8.92257e-16	ENSMUSG00000033152	1.34369
ENSMUSG00000021518	-0.399967	6.22248	76.2003	2.563e-18	5.81885e-17	ENSMUSG00000056895	0.862673	4.08545	71.6004	2.635e-17	6.08126e-16	ENSMUSG00000020475	-2.17793	0.302202	87.5365	8.274e-21	1.91926e-19	ENSMUSG00000031104	-0.582621	3.71593	80.7603	2.54826e-19	6.00672e-18	ENSMUSG00000020642	0.774079	4.44577	50.5725	1.14843e-12	2.4101e-11	ENSMUSG00000021799	1.36318	2.38363	66.6118	3.30609e-16	7.02711e-15	ENSMUSG00000072772	1.39653	2.96872	81.2859	1.95318e-19	4.20734e-18	ENSMUSG00000049285	1.69444	1.32696	70.7236	4.1094e-17	8.96637e-16	ENSMUSG00000046688	-1.9688
ENSMUSG00000030104	-0.383976	4.5531	76.0412	2.77801e-18	6.29725e-17	ENSMUSG00000024073	-0.414887	7.92631	71.434	2.86685e-17	6.60613e-16	ENSMUSG00000054459	-0.556212	8.5763	87.4419	8.67903e-21	2.01011e-19	ENSMUSG00000071647	0.646241	4.58158	80.7428	2.57099e-19	6.05094e-18	ENSMUSG00000034164	-1.38091	0.425593	50.5519	1.16055e-12	2.43178e-11	ENSMUSG00000072494	1.59671	0.977681	66.6068	3.31434e-16	7.03376e-15	ENSMUSG00000022340	1.30163	2.55852	81.1915	2.0487e-19	4.40629e-18	ENSMUSG00000027353	1.18002	2.06687	70.6674	4.22825e-17	9.21145e-16	ENSMUSG00000072662	1.7348
ENSMUSG00000027879	0.308721	6.19306	75.9987	2.83858e-18	6.42465e-17	ENSMUSG00000009145	1.33922	1.12723	71.4113	2.90009e-17	6.67245e-16	ENSMUSG00000048965	0.578004	3.7488	87.4216	8.76876e-21	2.02776e-19	ENSMUSG00000034218	0.525601	5.73429	80.4885	2.92396e-19	6.87108e-18	ENSMUSG00000054021	-0.702978	5.45323	50.5172	1.18123e-12	2.47131e-11	ENSMUSG00000054404	0.715805	7.18174	66.5952	3.33396e-16	7.06449e-15	ENSMUSG00000010453	-0.478408	6.42504	81.1773	2.06348e-19	4.43125e-18	ENSMUSG00000063179	0.724113	5.0354	70.6498	4.26617e-17	9.27973e-16	ENSMUSG00000042246	-1.89705
ENSMUSG00000046378	0.700952	4.51091	75.9794	2.86644e-18	6.47772e-17	ENSMUSG00000058246	1.40227	1.36524	71.1033	3.39009e-17	7.78084e-16	ENSMUSG00000007888	1.10385	1.72236	87.3841	8.93653e-21	2.06338e-19	ENSMUSG00000061132	-1.46878	2.05157	80.4425	2.99294e-19	7.02236e-18	ENSMUSG00000079316	-0.621544	4.22393	50.4497	1.22256e-12	2.55384e-11	ENSMUSG00000000958	-1.48276	3.37736	66.5318	3.44296e-16	7.28425e-15	ENSMUSG00000020838	-3.13264	1.44317	81.1294	2.11414e-19	4.53303e-18	ENSMUSG00000021143	-0.645965	5.87294	70.5684	4.44571e-17	9.6554e-16	ENSMUSG00000023021	0.809814
ENSMUSG00000042751	0.296924	7.77869	75.8573	3.04927e-18	6.88031e-17	ENSMUSG00000066441	-0.599103	4.87587	71.102	3.39226e-17	7.78084e-16	ENSMUSG00000078486	2.26653	0.990167	87.3216	9.2237e-21	2.12641e-19	ENSMUSG00000028445	-0.636451	5.49349	80.3576	3.12434e-19	7.3194e-18	ENSMUSG00000025137	0.607756	5.601	50.2717	1.33864e-12	2.79202e-11	ENSMUSG00000023277	0.916395	7.18048	66.5257	3.45366e-16	7.28917e-15	ENSMUSG00000033365	-1.08743	6.09915	81.1076	2.13758e-19	4.57626e-18	ENSMUSG00000027861	0.848375	10.1591	70.5034	4.5948e-17	9.96388e-16	ENSMUSG00000070644	-1.82921
ENSMUSG00000026380	-1.12558	2.75967	75.7958	3.14568e-18	7.08695e-17	ENSMUSG00000042213	0.844229	3.14618	71.0969	3.40104e-17	7.789e-16	ENSMUSG00000046637	1.09343	1.85484	87.2662	9.48545e-21	2.1834e-19	ENSMUSG00000005150	0.464322	4.54371	80.3351	3.16008e-19	7.39178e-18	ENSMUSG00000033166	0.606638	4.3183	50.2099	1.3815e-12	2.87699e-11	ENSMUSG00000050295	-1.77521	3.61143	66.5244	3.45589e-16	7.28917e-15	ENSMUSG00000028096	0.65076	4.9834	81.0659	2.18314e-19	4.66662e-18	ENSMUSG00000029600	-1.72252	2.7064	70.4927	4.61983e-17	1.00028e-15	ENSMUSG00000025745	0.670679
ENSMUSG00000020946	-0.289412	6.46267	75.7896	3.15559e-18	7.09839e-17	ENSMUSG00000035150	0.477861	6.8599	71.089	3.41468e-17	7.80827e-16	ENSMUSG00000035949	0.291497	6.21216	87.0696	1.04769e-20	2.40793e-19	ENSMUSG00000048668	-0.636358	3.35325	80.2713	3.26382e-19	7.62274e-18	ENSMUSG00000040710	0.76163	4.3353	50.1703	1.40964e-12	2.93111e-11	ENSMUSG00000027375	-1.49648	4.09844	66.4149	3.65338e-16	7.69391e-15	ENSMUSG00000067629	0.809168	3.36337	81.0543	2.196e-19	4.68692e-18	ENSMUSG00000068823	0.587154	9.30326	70.4085	4.82124e-17	1.04229e-15	ENSMUSG00000020434	-1.62412
ENSMUSG00000002679	0.479656	4.03684	75.6748	3.34446e-18	7.51175e-17	ENSMUSG00000093674	0.481933	7.76024	71.0412	3.49838e-17	7.98744e-16	ENSMUSG00000022614	-0.596342	3.72761	86.9585	1.10824e-20	2.5432e-19	ENSMUSG00000040829	1.7055	-0.645783	80.2585	3.28498e-19	7.66043e-18	ENSMUSG00000063652	2.31796	1.95972	50.134	1.43594e-12	2.98122e-11	ENSMUSG00000001911	0.717023	7.20129	66.3412	3.79256e-16	7.97481e-15	ENSMUSG00000116673	-1.68906	0.279724	80.9815	2.27844e-19	4.85544e-18	ENSMUSG00000041429	0.911	2.03194	70.3028	5.08658e-17	1.09797e-15	ENSMUSG00000029486	1.2031
ENSMUSG00000028832	0.388967	7.80956	75.4878	3.67664e-18	8.24522e-17	ENSMUSG00000028718	-1.47628	0.950935	71.0081	3.55764e-17	8.10282e-16	ENSMUSG00000009614	-0.574825	3.71628	86.9482	1.11401e-20	2.55252e-19	ENSMUSG00000026979	1.17444	0.725433	80.2185	3.35214e-19	7.80512e-18	ENSMUSG00000074264	-1.53037	3.77945	50.0975	1.46295e-12	3.03266e-11	ENSMUSG00000046032	0.515257	5.26676	66.1938	4.08699e-16	8.5808e-15	ENSMUSG00000066829	-1.31894	3.17003	80.9066	2.36641e-19	5.03522e-18	ENSMUSG00000027030	-1.0999	6.56178	70.2443	5.23976e-17	1.12931e-15	ENSMUSG00000028076	-1.80185
ENSMUSG00000074884	0.374486	6.48514	75.4767	3.6974e-18	8.27913e-17	ENSMUSG00000020744	-0.541919	5.01499	71.0069	3.55977e-17	8.10282e-16	ENSMUSG00000042350	0.411374	7.14106	86.8683	1.15992e-20	2.65366e-19	ENSMUSG00000037818	0.701128	4.8475	80.1849	3.40961e-19	7.92682e-18	ENSMUSG00000026649	1.49385	-0.362207	50.0727	1.48153e-12	3.06649e-11	ENSMUSG00000036022	-1.15685	3.30184	66.0931	4.30129e-16	9.01698e-15	ENSMUSG00000028803	0.591538	5.31364	80.8347	2.45407e-19	5.21378e-18	ENSMUSG00000036466	3.58246	-0.409522	70.1076	5.61554e-17	1.20845e-15	ENSMUSG00000030616	-0.765396
ENSMUSG00000006289	0.406872	4.6807	75.422	3.80131e-18	8.49886e-17	ENSMUSG00000066442	1.20861	1.80665	70.9517	3.66087e-17	8.32026e-16	ENSMUSG00000031917	-0.454739	4.45943	86.7717	1.21799e-20	2.78229e-19	ENSMUSG00000023032	0.310727	7.54887	80.1532	3.46479e-19	8.04285e-18	ENSMUSG00000029994	-0.658877	5.23934	50.0438	1.50351e-12	3.10725e-11	ENSMUSG00000040187	1.80955	1.47701	66.0594	4.37538e-16	9.15832e-15	ENSMUSG00000031673	-2.05233	4.17968	80.8268	2.46388e-19	5.22664e-18	ENSMUSG00000040548	0.522327	5.91559	69.9347	6.13013e-17	1.31718e-15	ENSMUSG00000026648	-0.927966
ENSMUSG00000024346	0.344363	5.51641	75.2839	4.07672e-18	9.10075e-17	ENSMUSG00000036964	1.23955	2.76828	70.8447	3.86476e-17	8.7703e-16	ENSMUSG00000034377	-0.68319	7.0638	86.5921	1.3338e-20	3.04221e-19	ENSMUSG00000003623	0.646139	5.21409	80.1316	3.50283e-19	8.11879e-18	ENSMUSG00000046714	-1.38785	0.814441	50.0312	1.51324e-12	3.12262e-11	ENSMUSG00000031879	0.759433	4.90824	66.0481	4.40052e-16	9.19696e-15	ENSMUSG00000031613	-2.14468	3.48177	80.7903	2.50982e-19	5.31601e-18	ENSMUSG00000041471	0.686078	3.2104	69.8016	6.55809e-17	1.407e-15	ENSMUSG00000091476	-2.17558
ENSMUSG00000003208	0.72784	3.59155	75.0861	4.50627e-18	1.00444e-16	ENSMUSG00000007880	-0.331349	7.29675	70.7666	4.02082e-17	9.11059e-16	ENSMUSG00000018661	-0.472635	5.44853	86.357	1.50215e-20	3.41651e-19	ENSMUSG00000049091	0.523418	5.19351	80.0425	3.66443e-19	8.47934e-18	ENSMUSG00000020680	0.613006	5.96078	49.9701	1.56108e-12	3.21644e-11	ENSMUSG00000024481	-2.52056	2.10587	65.9548	4.61391e-16	9.6283e-15	ENSMUSG00000063808	0.732382	4.01786	80.6994	2.62799e-19	5.55786e-18	ENSMUSG00000028293	-0.660221	4.1651	69.7932	6.5859e-17	1.41082e-15	ENSMUSG00000074217	-0.97131
ENSMUSG00000002781	0.608536	4.54712	74.5936	5.78311e-18	1.28709e-16	ENSMUSG00000044811	1.27683	1.78063	70.7302	4.09583e-17	9.26651e-16	ENSMUSG00000036632	-0.552647	3.80003	86.3566	1.50246e-20	3.41651e-19	ENSMUSG00000004415	-1.31231	2.43227	80.0398	3.66951e-19	8.47934e-18	ENSMUSG00000055027	0.530677	9.21897	49.9306	1.59278e-12	3.27679e-11	ENSMUSG00000052949	1.6785	3.79918	65.8593	4.84298e-16	1.00816e-14	ENSMUSG00000056494	-3.96292	0.417583	80.6476	2.69783e-19	5.69692e-18	ENSMUSG00000049327	0.737716	7.53597	69.7627	6.68866e-17	1.43066e-15	ENSMUSG00000022452	-0.728733
ENSMUSG00000038155	1.67622	1.02059	74.5769	5.83212e-18	1.29604e-16	ENSMUSG00000028832	0.383557	7.71905	70.6843	4.19224e-17	9.47027e-16	ENSMUSG00000003955	0.505219	4.56698	86.3417	1.51381e-20	3.4371e-19	ENSMUSG00000010342	1.98235	1.49098	79.8501	4.0392e-19	9.31949e-18	ENSMUSG00000054693	0.716121	6.69816	49.9211	1.60055e-12	3.28779e-11	ENSMUSG00000028278	1.09948	7.2104	65.8581	4.84579e-16	1.00816e-14	ENSMUSG00000068036	0.866367	7.26893	80.5751	2.7986e-19	5.90076e-18	ENSMUSG00000038352	-3.26207	1.59793	69.7584	6.70314e-17	1.43159e-15	ENSMUSG00000029084	-1.27078
ENSMUSG00000109179	0.802327	3.54314	74.5587	5.88605e-18	1.30605e-16	ENSMUSG00000071984	-1.51843	3.7776	70.6773	4.20715e-17	9.48961e-16	ENSMUSG00000034435	2.68911	1.44089	86.3162	1.53343e-20	3.4764e-19	ENSMUSG00000025899	0.367776	6.11075	79.6943	4.3706e-19	1.00689e-17	ENSMUSG00000025352	0.999371	2.08333	49.8667	1.64555e-12	3.37513e-11	ENSMUSG00000024065	-1.35392	3.42055	65.8138	4.95608e-16	1.02885e-14	ENSMUSG00000060961	-0.938905	5.25045	80.4943	2.9155e-19	6.13797e-18	ENSMUSG00000034903	-0.604696	6.18559	69.6179	7.19792e-17	1.53494e-15	ENSMUSG00000028970	-3.81202
ENSMUSG00000027709	0.573599	5.44024	74.546	5.92416e-18	1.31252e-16	ENSMUSG00000060301	-0.572512	5.00713	70.5577	4.47001e-17	1.00673e-15	ENSMUSG00000036986	0.483957	4.14414	85.852	1.9392e-20	4.38968e-19	ENSMUSG00000056130	1.53895	-0.310399	79.4265	5.00499e-19	1.1513e-17	ENSMUSG00000064307	1.13063	1.50814	49.6964	1.79471e-12	3.67549e-11	ENSMUSG00000038521	-1.34281	5.42345	65.8121	4.96019e-16	1.02885e-14	ENSMUSG00000024999	0.617864	3.92404	80.4752	2.94383e-19	6.18826e-18	ENSMUSG00000032377	0.996576	5.03862	69.579	7.34127e-17	1.56315e-15	ENSMUSG00000031382	3.06096
ENSMUSG00000053093	1.05593	3.09229	74.4166	6.3254e-18	1.3993e-16	ENSMUSG00000107002	-0.718905	4.30733	70.5543	4.47774e-17	1.00695e-15	ENSMUSG00000021728	0.606313	5.80367	85.8196	1.9712e-20	4.45538e-19	ENSMUSG00000070304	0.507867	8.62368	79.4069	5.05495e-19	1.16104e-17	ENSMUSG00000044080	-0.725347	8.91214	49.6275	1.85893e-12	3.80129e-11	ENSMUSG00000027784	0.730114	6.77243	65.6755	5.31631e-16	1.10105e-14	ENSMUSG00000027544	0.750204	4.70132	80.432	3.00891e-19	6.31553e-18	ENSMUSG00000028832	0.837336	3.91827	69.4981	7.64884e-17	1.62515e-15	ENSMUSG00000020151	-2.94938
ENSMUSG00000028556	-0.340391	5.93821	74.3556	6.52385e-18	1.44104e-16	ENSMUSG00000031760	0.866596	7.54266	70.4697	4.67389e-17	1.04948e-15	ENSMUSG00000036398	0.655358	5.93992	85.8118	1.97904e-20	4.46638e-19	ENSMUSG00000035582	-3.52332	-0.453942	79.0354	6.10084e-19	1.39916e-17	ENSMUSG00000027318	-1.38515	2.36123	49.6174	1.86848e-12	3.81506e-11	ENSMUSG00000026032	0.839128	7.46221	65.6444	5.40095e-16	1.1169e-14	ENSMUSG00000021579	0.614313	7.0865	80.3625	3.11661e-19	6.52451e-18	ENSMUSG00000029730	0.73539	4.10797	69.4964	7.65548e-17	1.62515e-15	ENSMUSG00000037706	-0.568706
ENSMUSG00000022602	-2.08699	6.68577	74.326	6.62261e-18	1.46065e-16	ENSMUSG00000060923	0.642506	4.73066	70.4375	4.75082e-17	1.06515e-15	ENSMUSG00000074781	0.28432	7.27288	85.7926	1.99829e-20	4.50306e-19	ENSMUSG00000048478	0.724252	3.14815	79.0241	6.1357e-19	1.40504e-17	ENSMUSG00000031548	-0.959858	4.94384	49.5541	1.92975e-12	3.93426e-11	ENSMUSG00000035458	0.753516	12.209	65.6346	5.42784e-16	1.12078e-14	ENSMUSG00000047298	-4.04074	5.01169	80.3617	3.11783e-19	6.52451e-18	ENSMUSG00000058979	0.759228	5.02562	69.3915	8.07373e-17	1.71136e-15	ENSMUSG00000040952	-0.819614
ENSMUSG00000063297	-0.452139	7.65893	74.2745	6.79772e-18	1.49703e-16	ENSMUSG00000050103	0.860861	2.75466	70.3801	4.89102e-17	1.09494e-15	ENSMUSG00000032623	-7.74677	0.459408	85.7644	2.02705e-20	4.56102e-19	ENSMUSG00000032623	-8.0008	0.674494	78.9915	6.23768e-19	1.42625e-17	ENSMUSG00000033096	0.76922	5.92469	49.5086	1.97502e-12	4.02051e-11	ENSMUSG00000047446	-0.819767	4.79956	65.6186	5.47192e-16	1.12818e-14	ENSMUSG00000020651	2.48448	-0.878687	80.3347	3.16073e-19	6.60436e-18	ENSMUSG00000022404	0.611224	4.1348	69.3801	8.1205e-17	1.7187e-15	ENSMUSG00000024537	-0.796038
ENSMUSG00000033902	-0.312289	6.50127	74.2463	6.89531e-18	1.51624e-16	ENSMUSG00000036138	-0.72134	4.92656	70.3609	4.93902e-17	1.10403e-15	ENSMUSG00000020526	0.651998	4.4122	85.3741	2.46937e-20	5.54795e-19	ENSMUSG00000050335	1.69199	1.11667	78.9872	6.25144e-19	1.42726e-17	ENSMUSG00000021185	-0.885095	6.03092	49.503	1.98072e-12	4.02608e-11	ENSMUSG00000053398	-1.91433	1.62438	65.5663	5.61903e-16	1.15405e-14	ENSMUSG00000031575	0.461793	5.463	80.2163	3.35589e-19	7.00165e-18	ENSMUSG00000048332	-0.540201	6.63575	69.2252	8.78375e-17	1.85572e-15	ENSMUSG00000027339	-1.078
ENSMUSG00000020523	0.362663	5.37929	74.205	7.04126e-18	1.54602e-16	ENSMUSG00000008333	0.575082	4.57281	70.3155	5.05387e-17	1.12802e-15	ENSMUSG00000035649	0.421601	6.70931	85.3173	2.54124e-20	5.70088e-19	ENSMUSG00000037578	-3.37765	2.15621	78.9541	6.35707e-19	1.4492e-17	ENSMUSG00000029762	-1.70772	2.5883	49.4514	2.03349e-12	4.12716e-11	ENSMUSG00000027131	0.661634	5.3853	65.5658	5.62057e-16	1.15405e-14	ENSMUSG00000092335	-2.7147	-0.319622	79.9058	3.92695e-19	8.18084e-18	ENSMUSG00000022707	0.540054	6.1357	69.2229	8.79418e-17	1.85572e-15	ENSMUSG00000035642	-0.860806
ENSMUSG00000061046	0.599945	6.62646	74.1832	7.11953e-18	1.56088e-16	ENSMUSG00000070034	-1.65167	-0.248823	70.2806	5.1441e-17	1.14644e-15	ENSMUSG00000037578	-3.8703	2.1528	85.2447	2.63629e-20	5.90529e-19	ENSMUSG00000027884	-0.491682	4.99067	78.9075	6.50874e-19	1.48156e-17	ENSMUSG00000052415	-2.64293	-0.0883996	49.3897	2.09839e-12	4.25253e-11	ENSMUSG00000078350	-1.60586	3.60492	65.5651	5.62257e-16	1.15405e-14	ENSMUSG00000031311	-0.697972	6.07826	79.7478	4.25377e-19	8.84848e-18	ENSMUSG00000012117	0.710444	5.30401	69.1938	8.92469e-17	1.88045e-15	ENSMUSG00000048782	-2.10264
ENSMUSG00000029836	0.354508	6.03888	74.1368	7.28867e-18	1.59558e-16	ENSMUSG00000045519	-0.720414	2.88443	70.2518	5.21975e-17	1.16157e-15	ENSMUSG00000089996	-4.22909	-1.38746	85.1554	2.75817e-20	6.16908e-19	ENSMUSG00000051736	-0.990064	3.33289	78.5049	7.9801e-19	1.81378e-17	ENSMUSG00000026455	0.418129	5.14376	49.3846	2.10393e-12	4.2574e-11	ENSMUSG00000029093	-2.05123	3.35117	65.4684	5.90535e-16	1.21029e-14	ENSMUSG00000036854	-0.949759	8.88647	79.7362	4.27884e-19	8.88736e-18	ENSMUSG00000018861	-0.973759	3.12894	69.1055	9.33367e-17	1.96369e-15	ENSMUSG00000027394	0.730035
ENSMUSG00000026676	-1.51366	3.64076	74.0378	7.66353e-18	1.67514e-16	ENSMUSG00000028062	0.425031	5.02961	70.2264	5.28753e-17	1.1749e-15	ENSMUSG00000032494	1.64834	0.538112	85.0009	2.98237e-20	6.66062e-19	ENSMUSG00000027209	-4.41363	-0.483521	78.3987	8.42067e-19	1.91107e-17	ENSMUSG00000022856	-1.06749	2.8259	49.3641	2.12601e-12	4.29568e-11	ENSMUSG00000005611	-1.18791	4.91003	65.4652	5.91504e-16	1.21047e-14	ENSMUSG00000054509	-1.06163	5.70678	79.667	4.43149e-19	9.19072e-18	ENSMUSG00000031171	0.556152	3.92977	68.9617	1.00393e-16	2.109e-15	ENSMUSG00000062488	1.26754
ENSMUSG00000030861	0.373588	6.45611	74.0005	7.80974e-18	1.70457e-16	ENSMUSG00000053093	1.11439	3.35637	70.1706	5.43912e-17	1.20679e-15	ENSMUSG00000006442	-0.522631	4.84362	84.9244	3.09997e-20	6.91297e-19	ENSMUSG00000020079	0.490172	4.70898	78.3933	8.4437e-19	1.91345e-17	ENSMUSG00000002017	0.405605	6.04266	49.3472	2.1444e-12	4.32639e-11	ENSMUSG00000025964	1.03044	2.86394	65.4202	6.05167e-16	1.23659e-14	ENSMUSG00000037145	-6.95468	0.522051	79.6557	4.45688e-19	9.22964e-18	ENSMUSG00000017692	-2.84167	3.36627	68.9401	1.01501e-16	2.12912e-15	ENSMUSG00000040387	1.93702
ENSMUSG00000027522	0.324475	7.12748	73.9878	7.86026e-18	1.71305e-16	ENSMUSG00000020474	0.848465	3.58478	70.1032	5.62817e-17	1.24688e-15	ENSMUSG00000058407	-0.465518	5.3184	84.8874	3.15844e-20	7.03293e-19	ENSMUSG00000002814	0.693119	3.34338	78.3486	8.63698e-19	1.95434e-17	ENSMUSG00000054469	-0.904898	6.64674	49.3019	2.19445e-12	4.4208e-11	ENSMUSG00000001225	-2.35248	3.31693	65.3184	6.37242e-16	1.3002e-14	ENSMUSG00000029311	-0.827064	4.54761	79.5211	4.77097e-19	9.86543e-18	ENSMUSG00000042901	-0.531989	5.14473	68.8936	1.0392e-16	2.17383e-15	ENSMUSG00000020844	0.802151
ENSMUSG00000032202	0.580825	3.84465	73.8876	8.2696e-18	1.79959e-16	ENSMUSG00000020459	0.534083	5.21804	70.06	5.75282e-17	1.27261e-15	ENSMUSG00000097392	-0.493171	6.14585	84.8031	3.29602e-20	7.32841e-19	ENSMUSG00000025742	-0.538771	4.98098	78.2477	9.08973e-19	2.05374e-17	ENSMUSG00000026585	-0.547027	5.107	49.2469	2.25688e-12	4.53979e-11	ENSMUSG00000069769	0.625605	7.75958	65.2886	6.46936e-16	1.31802e-14	ENSMUSG00000023032	1.66892	2.37604	79.4692	4.89805e-19	1.01132e-17	ENSMUSG00000056481	-1.0123	3.92124	68.8906	1.04081e-16	2.17383e-15	ENSMUSG00000006281	-1.06007
ENSMUSG00000021814	-0.412847	6.0032	73.5918	9.60643e-18	2.08741e-16	ENSMUSG00000047037	0.484201	6.40763	70.0342	5.82841e-17	1.28742e-15	ENSMUSG00000016496	-1.16484	1.36605	84.7767	3.34034e-20	7.41594e-19	ENSMUSG00000003929	-0.449685	5.07294	78.242	9.11605e-19	2.05664e-17	ENSMUSG00000022012	-1.79171	1.48927	49.244	2.2602e-12	4.53979e-11	ENSMUSG00000038879	-2.02833	0.102388	65.2284	6.67013e-16	1.35692e-14	ENSMUSG00000037627	2.03136	-0.118671	79.1871	5.64975e-19	1.1648e-17	ENSMUSG00000055541	2.60627	1.17756	68.8903	1.04095e-16	2.17383e-15	ENSMUSG00000026715	2.01385
ENSMUSG00000030032	0.636345	3.89092	73.5098	1.00139e-17	2.17273e-16	ENSMUSG00000034768	-1.18376	1.39104	69.852	6.39265e-17	1.40997e-15	ENSMUSG00000048731	1.24613	1.6146	84.7307	3.41903e-20	7.57943e-19	ENSMUSG00000034729	-0.59603	4.49881	78.2025	9.30008e-19	2.09506e-17	ENSMUSG00000028999	0.802901	4.78633	49.2249	2.28231e-12	4.57743e-11	ENSMUSG00000025871	0.496315	6.8845	65.203	6.75676e-16	1.37251e-14	ENSMUSG00000042476	-1.1174	5.16038	79.161	5.72487e-19	1.17855e-17	ENSMUSG00000029227	0.451949	5.61585	68.8809	1.04593e-16	2.18101e-15	ENSMUSG00000038489	0.871325
ENSMUSG00000040370	0.56724	4.46046	73.3899	1.0641e-17	2.30212e-16	ENSMUSG00000051427	-0.418228	5.088	69.8346	6.44924e-17	1.42035e-15	ENSMUSG00000025078	-0.362378	5.26148	84.5612	3.72496e-20	8.24547e-19	ENSMUSG00000023919	-0.889797	1.99608	78.1862	9.37703e-19	2.10928e-17	ENSMUSG00000044348	1.04915	2.19316	49.2003	2.31121e-12	4.62288e-11	ENSMUSG00000025076	1.13374	4.25187	65.139	6.97961e-16	1.41569e-14	ENSMUSG00000025916	3.93021	0.649834	79.1558	5.74014e-19	1.17995e-17	ENSMUSG00000048965	1.16819	2.00344	68.7789	1.10143e-16	2.29334e-15	ENSMUSG00000009614	1.18597
ENSMUSG00000006262	0.636463	5.97642	73.3898	1.06416e-17	2.30212e-16	ENSMUSG00000026141	-0.883007	4.3824	69.7753	6.646e-17	1.46153e-15	ENSMUSG00000047246	-1.2806	2.0821	84.5007	3.84074e-20	8.48923e-19	ENSMUSG00000020475	-2.55003	0.457123	78.1247	9.67378e-19	2.17283e-17	ENSMUSG00000032249	0.505759	7.21795	49.1998	2.31178e-12	4.62288e-11	ENSMUSG00000038496	-2.2986	-0.432787	65.1276	7.02008e-16	1.4218e-14	ENSMUSG00000022972	0.678131	4.49829	79.0918	5.92901e-19	1.21698e-17	ENSMUSG00000103749	0.909811	1.67553	68.746	1.12001e-16	2.32859e-15	ENSMUSG00000025932	3.29447
ENSMUSG00000040621	-0.803382	2.61448	73.3634	1.07845e-17	2.32961e-16	ENSMUSG00000058297	0.306411	10.0371	69.7384	6.77144e-17	1.48693e-15	ENSMUSG00000091764	-0.718959	2.38485	84.495	3.85194e-20	8.50081e-19	ENSMUSG00000040029	-0.413757	6.1234	77.9544	1.05449e-18	2.365e-17	ENSMUSG00000034681	0.63107	5.34256	49.0955	2.43802e-12	4.86815e-11	ENSMUSG00000055745	0.904887	4.13558	65.0848	7.17433e-16	1.4509e-14	ENSMUSG00000033021	-0.676237	4.85118	78.9214	6.46308e-19	1.32465e-17	ENSMUSG00000092558	-0.67472	3.98838	68.7421	1.1222e-16	2.32972e-15	ENSMUSG00000038172	1.27383
ENSMUSG00000040557	-1.0605	2.47563	73.3599	1.08037e-17	2.33034e-16	ENSMUSG00000027822	0.456941	5.07739	69.6595	7.04777e-17	1.54438e-15	ENSMUSG00000063558	-1.8337	3.79397	84.4922	3.85731e-20	8.50081e-19	ENSMUSG00000040296	0.858353	2.90503	77.8898	1.08955e-18	2.44004e-17	ENSMUSG00000035637	-1.15951	4.12668	49.0303	2.52039e-12	5.02523e-11	ENSMUSG00000032558	-0.898173	3.2118	65.0371	7.35015e-16	1.48428e-14	ENSMUSG00000030351	-2.30994	0.188493	78.8579	6.67418e-19	1.3659e-17	ENSMUSG00000024188	0.558682	5.80225	68.7157	1.13734e-16	2.35768e-15	ENSMUSG00000038976	0.770209
ENSMUSG00000006313	-1.9922	-0.678177	73.2625	1.13502e-17	2.44463e-16	ENSMUSG00000028174	-2.83799	-0.111849	69.6578	7.05378e-17	1.54438e-15	ENSMUSG00000044835	-0.688763	6.1429	84.4131	4.01487e-20	8.83507e-19	ENSMUSG00000058743	1.4575	1.76281	77.8489	1.1123e-18	2.48734e-17	ENSMUSG00000006344	-0.972532	3.1283	49.0021	2.55686e-12	5.09048e-11	ENSMUSG00000061479	-0.639322	4.56907	65.0329	7.36596e-16	1.48529e-14	ENSMUSG00000010080	1.63964	5.95868	78.8454	6.71659e-19	1.37257e-17	ENSMUSG00000063856	-1.34687	6.12052	68.679	1.1587e-16	2.39844e-15	ENSMUSG00000022246	-0.72944
ENSMUSG00000096446	2.50768	-0.654838	73.1906	1.17714e-17	2.53164e-16	ENSMUSG00000078713	0.499416	4.37075	69.6445	7.10175e-17	1.55261e-15	ENSMUSG00000052962	0.439892	4.87191	84.2043	4.46192e-20	9.80446e-19	ENSMUSG00000025980	-0.379402	7.43821	77.7872	1.14764e-18	2.56261e-17	ENSMUSG00000040003	-1.1025	2.25289	48.9817	2.58364e-12	5.13627e-11	ENSMUSG00000054169	-4.03148	0.186615	64.8655	8.01893e-16	1.61459e-14	ENSMUSG00000028293	-0.622695	4.0314	78.7066	7.20537e-19	1.4703e-17	ENSMUSG00000074227	0.822675	4.95905	68.6706	1.16362e-16	2.40509e-15	ENSMUSG00000028973	0.743433
ENSMUSG00000039016	0.324051	5.80903	73.0608	1.25718e-17	2.69981e-16	ENSMUSG00000039976	0.353665	6.55192	69.5996	7.26522e-17	1.58576e-15	ENSMUSG00000033770	4.19641	0.840293	84.1436	4.60105e-20	1.00954e-18	ENSMUSG00000047246	-1.66975	2.38254	77.703	1.19757e-18	2.67021e-17	ENSMUSG00000043230	1.29613	2.1825	48.8881	2.7099e-12	5.37939e-11	ENSMUSG00000025759	0.712183	4.54992	64.8597	8.04268e-16	1.617e-14	ENSMUSG00000041733	-0.90926	7.09416	78.7009	7.2262e-19	1.47239e-17	ENSMUSG00000028018	-2.32774	1.91381	68.6033	1.204e-16	2.48492e-15	ENSMUSG00000028023	1.13028
ENSMUSG00000050621	1.12445	2.28521	73.0133	1.28779e-17	2.76151e-16	ENSMUSG00000054146	2.09773	-0.495859	69.597	7.27463e-17	1.58576e-15	ENSMUSG00000074129	0.835568	4.12693	84.0936	4.71898e-20	1.0339e-18	ENSMUSG00000073795	1.58245	-0.401231	77.6662	1.22015e-18	2.71656e-17	ENSMUSG00000062960	0.675527	7.95108	48.8203	2.80526e-12	5.56055e-11	ENSMUSG00000018339	-1.44423	9.06003	64.7683	8.42438e-16	1.69127e-14	ENSMUSG00000048856	-1.57082	1.46097	78.558	7.76852e-19	1.58058e-17	ENSMUSG00000075470	-0.617637	5.88284	68.5948	1.2092e-16	2.492e-15	ENSMUSG00000073680	-1.30789
ENSMUSG00000026888	-0.606281	3.95022	72.823	1.41815e-17	3.03663e-16	ENSMUSG00000044308	-0.367522	8.11113	69.5536	7.43662e-17	1.61871e-15	ENSMUSG00000022210	-0.565627	3.4239	83.952	5.06942e-20	1.10907e-18	ENSMUSG00000031662	1.09543	0.255745	77.6612	1.22319e-18	2.71937e-17	ENSMUSG00000035941	-0.423587	5.85288	48.8001	2.83427e-12	5.60986e-11	ENSMUSG00000029122	-1.16659	4.17752	64.7392	8.54989e-16	1.71397e-14	ENSMUSG00000070867	-1.68026	5.9843	78.5153	7.93799e-19	1.61271e-17	ENSMUSG00000048915	-0.897247	3.98106	68.5832	1.21634e-16	2.50306e-15	ENSMUSG00000027870	-3.24643
ENSMUSG00000027593	-0.449112	6.06624	72.7459	1.47464e-17	3.15299e-16	ENSMUSG00000045968	1.70299	0.753196	69.4649	7.77884e-17	1.69074e-15	ENSMUSG00000024787	-0.407655	4.7567	83.9193	5.1538e-20	1.12588e-18	ENSMUSG00000044716	0.599151	4.38667	77.5731	1.27898e-18	2.83925e-17	ENSMUSG00000047205	-0.673091	5.95224	48.6685	3.03097e-12	5.99047e-11	ENSMUSG00000035930	-1.96108	2.69953	64.6994	8.72415e-16	1.74497e-14	ENSMUSG00000021552	0.826227	4.73118	78.4876	8.05015e-19	1.63311e-17	ENSMUSG00000027890	1.58796	5.05803	68.5646	1.22789e-16	2.52317e-15	ENSMUSG00000024646	-0.719259
ENSMUSG00000035305	-1.24649	1.9679	72.7056	1.5051e-17	3.21343e-16	ENSMUSG00000057147	-0.715129	3.83391	69.4159	7.97446e-17	1.73074e-15	ENSMUSG00000034151	1.34006	1.14933	83.9041	5.19358e-20	1.13293e-18	ENSMUSG00000020636	1.64067	-0.508096	77.4165	1.38454e-18	3.06912e-17	ENSMUSG00000032803	0.610553	6.94525	48.5607	3.2022e-12	6.31968e-11	ENSMUSG00000014444	-0.824443	6.03723	64.6957	8.74066e-16	1.74497e-14	ENSMUSG00000048915	-1.03243	3.74107	78.4395	8.24843e-19	1.67091e-17	ENSMUSG00000030553	2.31211	0.276768	68.3626	1.36034e-16	2.79128e-15	ENSMUSG00000050088	-0.604
ENSMUSG00000052139	-0.53769	4.18527	72.6978	1.51102e-17	3.2214e-16	ENSMUSG00000038560	1.81732	1.47729	69.3849	8.10082e-17	1.75561e-15	ENSMUSG00000089872	0.604058	5.81234	83.7757	5.54228e-20	1.20724e-18	ENSMUSG00000039523	-0.401866	5.58104	77.3468	1.43424e-18	3.17469e-17	ENSMUSG00000040213	0.893939	5.78975	48.5549	3.2117e-12	6.32923e-11	ENSMUSG00000061451	-1.98145	3.52307	64.6952	8.74259e-16	1.74497e-14	ENSMUSG00000035878	-2.31167	1.84004	78.3604	8.58579e-19	1.73672e-17	ENSMUSG00000078495	-9.11969	2.49465	68.2861	1.41412e-16	2.8974e-15	ENSMUSG00000029066	0.737756
ENSMUSG00000044600	0.388074	6.29866	72.5947	1.59203e-17	3.3857e-16	ENSMUSG00000027746	0.369158	6.03751	69.3455	8.26392e-17	1.78836e-15	ENSMUSG00000028018	-2.31322	3.06051	83.7132	5.72024e-20	1.24419e-18	ENSMUSG00000033703	0.539666	4.8542	77.3166	1.45636e-18	3.21899e-17	ENSMUSG00000052748	0.687303	3.95875	48.4439	3.39867e-12	6.68799e-11	ENSMUSG00000048644	-1.95698	0.343503	64.6889	8.77073e-16	1.74804e-14	ENSMUSG00000019775	-3.26009	0.378995	78.3541	8.61324e-19	1.739e-17	ENSMUSG00000053886	-1.70204	3.76728	68.1432	1.52046e-16	3.11078e-15	ENSMUSG00000020412	0.606078
ENSMUSG00000024600	2.35279	0.207969	72.5939	1.5927e-17	3.3857e-16	ENSMUSG00000041245	-0.403228	5.75786	69.2844	8.52413e-17	1.84148e-15	ENSMUSG00000053774	0.457233	6.56182	83.6478	5.91247e-20	1.28414e-18	ENSMUSG00000038545	0.482813	5.58801	77.3042	1.46551e-18	3.23452e-17	ENSMUSG00000026429	1.05514	1.77406	48.3934	3.48737e-12	6.85261e-11	ENSMUSG00000040687	-0.935221	4.13912	64.6446	8.97037e-16	1.78525e-14	ENSMUSG00000025104	-0.901285	4.3281	78.352	8.62199e-19	1.739e-17	ENSMUSG00000030722	0.977099	3.66224	68.1381	1.52436e-16	3.11425e-15	ENSMUSG00000019471	0.506483
ENSMUSG00000004032	-1.28033	6.16183	72.5407	1.63622e-17	3.47317e-16	ENSMUSG00000020003	-0.529018	4.6217	69.2821	8.53405e-17	1.84148e-15	ENSMUSG00000024799	0.474669	4.43736	83.6441	5.92376e-20	1.28474e-18	ENSMUSG00000066842	-1.47446	4.13653	77.2429	1.51175e-18	3.33175e-17	ENSMUSG00000028466	0.497505	4.79273	48.3796	3.51209e-12	6.8912e-11	ENSMUSG00000031691	0.436485	5.90935	64.4721	9.79107e-16	1.94576e-14	ENSMUSG00000033356	-1.46611	1.10347	78.2979	8.8615e-19	1.78472e-17	ENSMUSG00000021686	0.468732	5.60352	67.9731	1.65745e-16	3.38125e-15	ENSMUSG00000025867	1.14724
ENSMUSG00000008028	1.53509	1.10307	72.4047	1.75299e-17	3.71568e-16	ENSMUSG00000051007	0.506737	5.03519	69.2616	8.62322e-17	1.85804e-15	ENSMUSG00000001445	-0.446869	5.27199	83.5929	6.07916e-20	1.31654e-18	ENSMUSG00000034151	1.4387	1.25053	77.1936	1.54996e-18	3.40657e-17	ENSMUSG00000048498	2.58397	-0.135787	48.3494	3.56654e-12	6.98795e-11	ENSMUSG00000026455	0.518897	5.11405	64.4604	9.8493e-16	1.95451e-14	ENSMUSG00000031171	0.592734	3.82567	78.2911	8.89233e-19	1.78835e-17	ENSMUSG00000054715	0.859197	3.23771	67.9629	1.66605e-16	3.39388e-15	ENSMUSG00000031958	-1.23301
ENSMUSG00000045672	-1.03993	4.7362	72.3084	1.84059e-17	3.89573e-16	ENSMUSG00000073616	0.519481	5.55754	69.2462	8.691e-17	1.86994e-15	ENSMUSG00000110218	-2.06914	1.79655	83.4343	6.58678e-20	1.42442e-18	ENSMUSG00000027890	1.7632	4.43634	77.1933	1.55017e-18	3.40657e-17	ENSMUSG00000014329	-0.81378	5.50496	48.295	3.66686e-12	7.17415e-11	ENSMUSG00000004945	0.553787	6.39567	64.2105	1.11812e-15	2.21561e-14	ENSMUSG00000029830	-7.8422	-0.443395	78.1884	9.36689e-19	1.88107e-17	ENSMUSG00000006435	-1.63083	0.990657	67.8577	1.75731e-16	3.57463e-15	ENSMUSG00000043923	-0.951283
[truncated: 7,407 more rows]
[truncated: 142 more columns]

## Sheet: Data S7B
Supplementary Data S7B. Full list of DE lncRNA genes for the first RNA-Sea dataset. Only the DE genes reaching statistical significance after multiple correction testing (FDR < 0.05) were retained.
Brain																								Heart																								Kidney
Inter-subspecies (FR vs KA)												Inter-species (FR-KA vs SP)												Inter-subspecies (FR vs KA)												Inter-species (FR-KA vs SP)												Inter-subspecies (FR vs KA)
Male						Female						Male						Female						Male						Female						Male						Female						Male
[truncated: 1,382 more rows]
[truncated: 142 more columns]
