# Supplementary material for: Population level analyses reveal contrasting landscapes of gene expression divergence and evolution between male and female transcriptome lineages in the house mouse
Source: Research Square preprint supplement (doi:10.21203/rs.3.rs-6634316/v1), 2025-05-22
Supplement: Supplementary file 3 [file 355c2ca1d128698dda6121dd.xlsx]

## Sheet: Data_S6A
Supplementary Data S6A. Full list of significantly enriched KEGG pathways of sex-specific DE genes. Only KEGG pathways reaching statistical significance (FDR < 0.05) were list. KEGG pathways shared by male- and female-specific DE genes were highlighted in yellow.
Brain																Heart																Kidney																Liver
Inter-subspecies (FR vs KA)								Inter-species (FR-KA vs SP)								Inter-subspecies (FR vs KA)								Inter-species (FR-KA vs SP)								Inter-subspecies (FR vs KA)								Inter-species (FR-KA vs SP)								Inter-subspecies (FR vs KA)
Male-specific DE genes				Female-specific DE genes				Male-specific DE genes				Female-specific DE genes				Male-specific DE genes				Female-specific DE genes				Male-specific DE genes				Female-specific DE genes				Male-specific DE genes				Female-specific DE genes				Male-specific DE genes				Female-specific DE genes				Male-specific DE genes
Pathway_ID	Description	pvalue	FDR	Pathway_ID	Description	pvalue	FDR	Pathway_ID	Description	pvalue	FDR	Pathway_ID	Description	pvalue	FDR	Pathway_ID	Description	pvalue	FDR	Pathway_ID	Description	pvalue	FDR	Pathway_ID	Description	pvalue	FDR	Pathway_ID	Description	pvalue	FDR	Pathway_ID	Description	pvalue	FDR	Pathway_ID	Description	pvalue	FDR	Pathway_ID	Description	pvalue	FDR	Pathway_ID	Description	pvalue	FDR	Pathway_ID	Description
mmu05170	Human immunodeficiency virus 1 infection - Mus musculus (house mouse)	7.46517e-05	0.0182538					mmu05022	Pathways of neurodegeneration - multiple diseases - Mus musculus (house mouse)	6.11157e-07	0.000198626					mmu05166	Human T-cell leukemia virus 1 infection - Mus musculus (house mouse)	3.65226e-06	0.0012089	mmu05020	Prion disease - Mus musculus (house mouse)	3.26501e-18	5.95864e-16	mmu04662	B cell receptor signaling pathway - Mus musculus (house mouse)	1.10029e-06	0.00030924	mmu04120	Ubiquitin mediated proteolysis - Mus musculus (house mouse)	2.32505e-05	0.00753315					mmu04020	Calcium signaling pathway - Mus musculus (house mouse)	0.000350375	0.0415197	mmu04510	Focal adhesion - Mus musculus (house mouse)	2.92014e-07	0.000100453	mmu04150	mTOR signaling pathway - Mus musculus (house mouse)	0.000104923	0.0356737	mmu04611	Platelet activation - Mus musculus (house mouse)
mmu05205	Proteoglycans in cancer - Mus musculus (house mouse)	0.000150032	0.0182538					mmu04810	Regulation of actin cytoskeleton - Mus musculus (house mouse)	5.72733e-06	0.000849949					mmu04213	Longevity regulating pathway - multiple species - Mus musculus (house mouse)	2.6682e-05	0.00441587	mmu05016	Huntington disease - Mus musculus (house mouse)	3.47443e-18	5.95864e-16	mmu00020	Citrate cycle (TCA cycle) - Mus musculus (house mouse)	0.00020208	0.0283976	mmu04144	Endocytosis - Mus musculus (house mouse)	0.000280608	0.0328365					mmu04015	Rap1 signaling pathway - Mus musculus (house mouse)	0.000406467	0.0415197	mmu05205	Proteoglycans in cancer - Mus musculus (house mouse)	1.01444e-06	0.000174484					mmu04510	Focal adhesion - Mus musculus (house mouse)
mmu04142	Lysosome - Mus musculus (house mouse)	0.000162981	0.0182538					mmu04010	MAPK signaling pathway - Mus musculus (house mouse)	7.84568e-06	0.000849949					mmu04068	FoxO signaling pathway - Mus musculus (house mouse)	0.00034846	0.031684	mmu05415	Diabetic cardiomyopathy - Mus musculus (house mouse)	7.37844e-18	8.43601e-16	mmu05020	Prion disease - Mus musculus (house mouse)	0.000389499	0.0301796	mmu04714	Thermogenesis - Mus musculus (house mouse)	0.000336975	0.0328365					mmu01521	EGFR tyrosine kinase inhibitor resistance - Mus musculus (house mouse)	0.000431382	0.0415197	mmu04010	MAPK signaling pathway - Mus musculus (house mouse)	5.66911e-06	0.000575077					mmu04933	AGE-RAGE signaling pathway in diabetic complications - Mus musculus (house mouse)
mmu05031	Amphetamine addiction - Mus musculus (house mouse)	0.000274297	0.0192191					mmu05016	Huntington disease - Mus musculus (house mouse)	3.712e-05	0.003016					mmu04210	Apoptosis - Mus musculus (house mouse)	0.000469359	0.031684	mmu05012	Parkinson disease - Mus musculus (house mouse)	1.4561e-17	1.24861e-15	mmu05010	Alzheimer disease - Mus musculus (house mouse)	0.000557878	0.0301796	mmu04330	Notch signaling pathway - Mus musculus (house mouse)	0.000405389	0.0328365					mmu04611	Platelet activation - Mus musculus (house mouse)	0.000488467	0.0415197	mmu04931	Insulin resistance - Mus musculus (house mouse)	6.68694e-06	0.000575077					mmu04010	MAPK signaling pathway - Mus musculus (house mouse)
mmu04928	ParathyroPathway_ID hormone synthesis, secretion and action - Mus musculus (house mouse)	0.000285998	0.0192191					mmu04014	Ras signaling pathway - Mus musculus (house mouse)	9.06719e-05	0.00589367					mmu04140	Autophagy - animal - Mus musculus (house mouse)	0.000478611	0.031684	mmu00190	OxPathway_IDative phosphorylation - Mus musculus (house mouse)	3.4096e-16	2.33899e-14	mmu05340	Primary immunodeficiency - Mus musculus (house mouse)	0.000583687	0.0301796	mmu04110	Cell cycle - Mus musculus (house mouse)	0.000646704	0.0419064									mmu01212	Fatty acPathway_ID metabolism - Mus musculus (house mouse)	1.19408e-05	0.000696973					mmu00983	Drug metabolism - other enzymes - Mus musculus (house mouse)
mmu04611	Platelet activation - Mus musculus (house mouse)	0.000351913	0.0197071					mmu04370	VEGF signaling pathway - Mus musculus (house mouse)	0.000123861	0.00632769					mmu00640	Propanoate metabolism - Mus musculus (house mouse)	0.000627044	0.0345919	mmu04714	Thermogenesis - Mus musculus (house mouse)	3.92585e-15	1.97098e-13	mmu05017	Spinocerebellar ataxia - Mus musculus (house mouse)	0.000686243	0.0301796													mmu04012	ErbB signaling pathway - Mus musculus (house mouse)	1.21565e-05	0.000696973					mmu04151	PI3K-Akt signaling pathway - Mus musculus (house mouse)
								mmu04015	Rap1 signaling pathway - Mus musculus (house mouse)	0.000142833	0.00632769					mmu04914	Progesterone-mediated oocyte maturation - Mus musculus (house mouse)	0.000891846	0.0421716	mmu05010	Alzheimer disease - Mus musculus (house mouse)	4.02242e-15	1.97098e-13	mmu05014	Amyotrophic lateral sclerosis - Mus musculus (house mouse)	0.000751664	0.0301796													mmu04360	Axon guPathway_IDance - Mus musculus (house mouse)	2.31235e-05	0.00113636					mmu04360	Axon guPathway_IDance - Mus musculus (house mouse)
								mmu04024	cAMP signaling pathway - Mus musculus (house mouse)	0.000155758	0.00632769					mmu04710	Circadian rhythm - Mus musculus (house mouse)	0.00121404	0.0447306	mmu05022	Pathways of neurodegeneration - multiple diseases - Mus musculus (house mouse)	5.01394e-14	2.14973e-12	mmu01200	Carbon metabolism - Mus musculus (house mouse)	0.00125153	0.0404086													mmu00071	Fatty acPathway_ID degradation - Mus musculus (house mouse)	5.47601e-05	0.00219051					mmu05165	Human papillomavirus infection - Mus musculus (house mouse)
								mmu05017	Spinocerebellar ataxia - Mus musculus (house mouse)	0.000255318	0.0092198					mmu04110	Cell cycle - Mus musculus (house mouse)	0.00121624	0.0447306	mmu05014	Amyotrophic lateral sclerosis - Mus musculus (house mouse)	4.97957e-13	1.89777e-11	mmu05415	Diabetic cardiomyopathy - Mus musculus (house mouse)	0.00129398	0.0404086													mmu04151	PI3K-Akt signaling pathway - Mus musculus (house mouse)	5.731e-05	0.00219051					mmu00480	Glutathione metabolism - Mus musculus (house mouse)
								mmu05014	Amyotrophic lateral sclerosis - Mus musculus (house mouse)	0.000289685	0.00936804					mmu05145	Toxoplasmosis - Mus musculus (house mouse)	0.00171484	0.0483444	mmu05208	Chemical carcinogenesis - reactive oxygen species - Mus musculus (house mouse)	2.92876e-11	1.00457e-09	mmu03050	Proteasome - Mus musculus (house mouse)	0.00150241	0.0412725													mmu04152	AMPK signaling pathway - Mus musculus (house mouse)	0.000110871	0.00381397					mmu01522	Endocrine resistance - Mus musculus (house mouse)
								mmu05010	Alzheimer disease - Mus musculus (house mouse)	0.000373232	0.00936804					mmu04919	ThyroPathway_ID hormone signaling pathway - Mus musculus (house mouse)	0.00185191	0.0483444	mmu04932	Non-alcoholic fatty liver disease - Mus musculus (house mouse)	8.49246e-10	2.6481e-08	mmu05230	Central carbon metabolism in cancer - Mus musculus (house mouse)	0.00161535	0.0412725													mmu04928	ParathyroPathway_ID hormone synthesis, secretion and action - Mus musculus (house mouse)	0.000145078	0.00453698					mmu04022	cGMP-PKG signaling pathway - Mus musculus (house mouse)
								mmu05020	Prion disease - Mus musculus (house mouse)	0.000400956	0.00936804					mmu04211	Longevity regulating pathway - Mus musculus (house mouse)	0.00187114	0.0483444	mmu00020	Citrate cycle (TCA cycle) - Mus musculus (house mouse)	3.13927e-07	8.97308e-06	mmu04914	Progesterone-mediated oocyte maturation - Mus musculus (house mouse)	0.00181506	0.0425106													mmu05211	Renal cell carcinoma - Mus musculus (house mouse)	0.000251993	0.00691697					mmu04512	ECM-receptor interaction - Mus musculus (house mouse)
								mmu05415	Diabetic cardiomyopathy - Mus musculus (house mouse)	0.000409084	0.00936804					mmu04137	Mitophagy - animal - Mus musculus (house mouse)	0.00189872	0.0483444	mmu05340	Primary immunodeficiency - Mus musculus (house mouse)	2.68148e-06	7.07499e-05																	mmu04910	Insulin signaling pathway - Mus musculus (house mouse)	0.000265691	0.00691697					mmu05220	Chronic myeloPathway_ID leukemia - Mus musculus (house mouse)
								mmu05218	Melanoma - Mus musculus (house mouse)	0.000410668	0.00936804									mmu04260	Cardiac muscle contraction - Mus musculus (house mouse)	3.30838e-05	0.000810554																	mmu04512	ECM-receptor interaction - Mus musculus (house mouse)	0.000292781	0.00691697					mmu05204	Chemical carcinogenesis - DNA adducts - Mus musculus (house mouse)
								mmu05216	ThyroPathway_ID cancer - Mus musculus (house mouse)	0.000432371	0.00936804									mmu04640	Hematopoietic cell lineage - Mus musculus (house mouse)	3.6247e-05	0.000828849																	mmu04936	Alcoholic liver disease - Mus musculus (house mouse)	0.000301612	0.00691697					mmu05418	FluPathway_ID shear stress and atherosclerosis - Mus musculus (house mouse)
								mmu05213	Endometrial cancer - Mus musculus (house mouse)	0.000469071	0.009528									mmu03050	Proteasome - Mus musculus (house mouse)	4.7872e-05	0.00102626																	mmu04148	Efferocytosis - Mus musculus (house mouse)	0.000365149	0.00743106					mmu04520	Adherens junction - Mus musculus (house mouse)
								mmu04728	Dopaminergic synapse - Mus musculus (house mouse)	0.000927622	0.017565									mmu04820	Cytoskeleton in muscle cells - Mus musculus (house mouse)	0.000194516	0.00392465																	mmu04920	Adipocytokine signaling pathway - Mus musculus (house mouse)	0.000367233	0.00743106					mmu04540	Gap junction - Mus musculus (house mouse)
								mmu05211	Renal cell carcinoma - Mus musculus (house mouse)	0.000972833	0.017565									mmu04723	Retrograde endocannabinoPathway_ID signaling - Mus musculus (house mouse)	0.00021091	0.004019																	mmu00620	Pyruvate metabolism - Mus musculus (house mouse)	0.000422777	0.0077183					mmu05146	Amoebiasis - Mus musculus (house mouse)
								mmu04070	PhosphatPathway_IDylinositol signaling system - Mus musculus (house mouse)	0.00124696	0.0210989									mmu04662	B cell receptor signaling pathway - Mus musculus (house mouse)	0.000230772	0.00416605																	mmu04720	Long-term potentiation - Mus musculus (house mouse)	0.000439957	0.0077183					mmu00040	Pentose and glucuronate interconversions - Mus musculus (house mouse)
								mmu00562	Inositol phosphate metabolism - Mus musculus (house mouse)	0.00129839	0.0210989									mmu01200	Carbon metabolism - Mus musculus (house mouse)	0.000440011	0.00754619																	mmu04014	Ras signaling pathway - Mus musculus (house mouse)	0.000448738	0.0077183					mmu05207	Chemical carcinogenesis - receptor activation - Mus musculus (house mouse)
								mmu05012	Parkinson disease - Mus musculus (house mouse)	0.00162761	0.0251892									mmu05134	Legionellosis - Mus musculus (house mouse)	0.000539286	0.00880834																	mmu05132	Salmonella infection - Mus musculus (house mouse)	0.000506728	0.00809811					mmu05133	Pertussis - Mus musculus (house mouse)
								mmu04720	Long-term potentiation - Mus musculus (house mouse)	0.00194976	0.0285757									mmu00640	Propanoate metabolism - Mus musculus (house mouse)	0.000779841	0.0121584																	mmu05165	Human papillomavirus infection - Mus musculus (house mouse)	0.000573363	0.00809811					mmu05208	Chemical carcinogenesis - reactive oxygen species - Mus musculus (house mouse)
								mmu04360	Axon guPathway_IDance - Mus musculus (house mouse)	0.00202228	0.0285757									mmu01212	Fatty acPathway_ID metabolism - Mus musculus (house mouse)	0.000848334	0.0126512																	mmu05415	Diabetic cardiomyopathy - Mus musculus (house mouse)	0.000580134	0.00809811					mmu04380	Osteoclast differentiation - Mus musculus (house mouse)
								mmu05031	Amphetamine addiction - Mus musculus (house mouse)	0.0025664	0.0333632									mmu04146	Peroxisome - Mus musculus (house mouse)	0.00102772	0.0146878																	mmu04068	FoxO signaling pathway - Mus musculus (house mouse)	0.000595515	0.00809811					mmu04015	Rap1 signaling pathway - Mus musculus (house mouse)
								mmu05230	Central carbon metabolism in cancer - Mus musculus (house mouse)	0.0025664	0.0333632									mmu05414	Dilated cardiomyopathy - Mus musculus (house mouse)	0.00120504	0.0165332																	mmu04916	Melanogenesis - Mus musculus (house mouse)	0.000602221	0.00809811					mmu04218	Cellular senescence - Mus musculus (house mouse)
								mmu04722	Neurotrophin signaling pathway - Mus musculus (house mouse)	0.00285746	0.0357183									mmu01210	2-Oxocarboxylic acPathway_ID metabolism - Mus musculus (house mouse)	0.00199648	0.0263382																	mmu00280	Valine, leucine and isoleucine degradation - Mus musculus (house mouse)	0.000621307	0.00809811					mmu04137	Mitophagy - animal - Mus musculus (house mouse)
								mmu05226	Gastric cancer - Mus musculus (house mouse)	0.00334281	0.0402375									mmu04371	Apelin signaling pathway - Mus musculus (house mouse)	0.00228432	0.0290194																	mmu05230	Central carbon metabolism in cancer - Mus musculus (house mouse)	0.000635607	0.00809811					mmu00982	Drug metabolism - cytochrome P450 - Mus musculus (house mouse)
								mmu04512	ECM-receptor interaction - Mus musculus (house mouse)	0.00386788	0.0444694									mmu04810	Regulation of actin cytoskeleton - Mus musculus (house mouse)	0.00245683	0.0300962																	mmu04934	Cushing syndrome - Mus musculus (house mouse)	0.000706621	0.00868134					mmu05222	Small cell lung cancer - Mus musculus (house mouse)
								mmu04912	GnRH signaling pathway - Mus musculus (house mouse)	0.00431267	0.0444694									mmu00785	Lipoic acPathway_ID metabolism - Mus musculus (house mouse)	0.00320169	0.0378682																	mmu04072	Phospholipase D signaling pathway - Mus musculus (house mouse)	0.000781474	0.00899793					mmu04120	Ubiquitin mediated proteolysis - Mus musculus (house mouse)
								mmu04022	cGMP-PKG signaling pathway - Mus musculus (house mouse)	0.0043176	0.0444694									mmu05410	Hypertrophic cardiomyopathy - Mus musculus (house mouse)	0.00360111	0.0411727																	mmu04261	Adrenergic signaling in cardiomyocytes - Mus musculus (house mouse)	0.000786112	0.00899793					mmu04371	Apelin signaling pathway - Mus musculus (house mouse)
								mmu04144	Endocytosis - Mus musculus (house mouse)	0.00431969	0.0444694									mmu04022	cGMP-PKG signaling pathway - Mus musculus (house mouse)	0.00429206	0.0471822																	mmu01200	Carbon metabolism - Mus musculus (house mouse)	0.00081086	0.00899793
								mmu04270	Vascular smooth muscle contraction - Mus musculus (house mouse)	0.00437853	0.0444694									mmu04010	MAPK signaling pathway - Mus musculus (house mouse)	0.00445198	0.0471822																	mmu04380	Osteoclast differentiation - Mus musculus (house mouse)	0.000853817	0.00902584
								mmu00532	Glycosaminoglycan biosynthesis - chondroitin sulfate / dermatan sulfate - Mus musculus (house mouse)	0.00459508	0.0447679									mmu05412	Arrhythmogenic right ventricular cardiomyopathy - Mus musculus (house mouse)	0.00453939	0.0471822																	mmu00640	Propanoate metabolism - Mus musculus (house mouse)	0.000908172	0.00902584
								mmu04510	Focal adhesion - Mus musculus (house mouse)	0.00468341	0.0447679																													mmu05142	Chagas disease - Mus musculus (house mouse)	0.000918295	0.00902584
								mmu05225	Hepatocellular carcinoma - Mus musculus (house mouse)	0.00538151	0.0499711																													mmu04114	Oocyte meiosis - Mus musculus (house mouse)	0.000918327	0.00902584
																																								mmu04930	Type II diabetes mellitus - Mus musculus (house mouse)	0.00105409	0.00991681
																																								mmu05223	Non-small cell lung cancer - Mus musculus (house mouse)	0.00106663	0.00991681
																																								mmu00630	Glyoxylate and dicarboxylate metabolism - Mus musculus (house mouse)	0.00119789	0.0108441
																																								mmu04071	SphingolipPathway_ID signaling pathway - Mus musculus (house mouse)	0.00131809	0.0116262
																																								mmu05010	Alzheimer disease - Mus musculus (house mouse)	0.00150683	0.0129587
																																								mmu04722	Neurotrophin signaling pathway - Mus musculus (house mouse)	0.00163866	0.0137487
																																								mmu05214	Glioma - Mus musculus (house mouse)	0.00172399	0.0141203
																																								mmu04210	Apoptosis - Mus musculus (house mouse)	0.001866	0.014928
																																								mmu05212	Pancreatic cancer - Mus musculus (house mouse)	0.00200761	0.0156958
																																								mmu05225	Hepatocellular carcinoma - Mus musculus (house mouse)	0.00257467	0.0196819
																																								mmu05020	Prion disease - Mus musculus (house mouse)	0.00266541	0.0199327
																																								mmu04611	Platelet activation - Mus musculus (house mouse)	0.00288037	0.0210819
																																								mmu04664	Fc epsilon RI signaling pathway - Mus musculus (house mouse)	0.00306427	0.0219606
																																								mmu04919	ThyroPathway_ID hormone signaling pathway - Mus musculus (house mouse)	0.0032117	0.0225474
																																								mmu04024	cAMP signaling pathway - Mus musculus (house mouse)	0.00369682	0.025386
																																								mmu04666	Fc gamma R-mediated phagocytosis - Mus musculus (house mouse)	0.00385363	0.025386
																																								mmu05135	Yersinia infection - Mus musculus (house mouse)	0.00390157	0.025386
																																								mmu04974	Protein digestion and absorption - Mus musculus (house mouse)	0.00398061	0.025386
																																								mmu04660	T cell receptor signaling pathway - Mus musculus (house mouse)	0.00398501	0.025386
																																								mmu04926	Relaxin signaling pathway - Mus musculus (house mouse)	0.00437679	0.0272448
																																								mmu04115	p53 signaling pathway - Mus musculus (house mouse)	0.0044352	0.0272448
																																								mmu00020	Citrate cycle (TCA cycle) - Mus musculus (house mouse)	0.00463887	0.0275133
																																								mmu00410	beta-Alanine metabolism - Mus musculus (house mouse)	0.00463887	0.0275133
																																								mmu03320	PPAR signaling pathway - Mus musculus (house mouse)	0.00480636	0.0279429
																																								mmu01250	Biosynthesis of nucleotPathway_IDe sugars - Mus musculus (house mouse)	0.00489348	0.0279429
																																								mmu04066	HIF-1 signaling pathway - Mus musculus (house mouse)	0.00495499	0.0279429
																																								mmu04218	Cellular senescence - Mus musculus (house mouse)	0.00514723	0.0285588
																																								mmu00650	Butanoate metabolism - Mus musculus (house mouse)	0.0052988	0.0289332
																																								mmu04921	Oxytocin signaling pathway - Mus musculus (house mouse)	0.00543723	0.0290018
																																								mmu04015	Rap1 signaling pathway - Mus musculus (house mouse)	0.00548	0.0290018
																																								mmu05100	Bacterial invasion of epithelial cells - Mus musculus (house mouse)	0.00580472	0.0302549
																																								mmu00520	Amino sugar and nucleotPathway_IDe sugar metabolism - Mus musculus (house mouse)	0.00597279	0.0306663
																																								mmu05231	Choline metabolism in cancer - Mus musculus (house mouse)	0.00618529	0.0312903
																																								mmu04064	NF-kappa B signaling pathway - Mus musculus (house mouse)	0.00767343	0.0379573
																																								mmu05215	Prostate cancer - Mus musculus (house mouse)	0.00772387	0.0379573
																																								mmu04933	AGE-RAGE signaling pathway in diabetic complications - Mus musculus (house mouse)	0.0086018	0.0416763
																																								mmu04310	Wnt signaling pathway - Mus musculus (house mouse)	0.00905064	0.043242
																																								mmu05145	Toxoplasmosis - Mus musculus (house mouse)	0.00942468	0.0444122
																																								mmu05210	Colorectal cancer - Mus musculus (house mouse)	0.00964448	0.0448338
																																								mmu04935	Growth hormone synthesis, secretion and action - Mus musculus (house mouse)	0.0101858	0.0467189
[truncated: 78 more columns]

## Sheet: Data_S6B
Supplementary Data S6B. Full list of significantly enriched GO BP terms of sex-specific DE genes. Only GO BP terms reaching statistical significance (FDR < 0.05) were list. GO BP terms shared by male- and female-specific DE genes were highlighted in yellow.
Brain																Heart																Kidney																Liver
Inter-subspecies (FR vs KA)								Inter-species (FR-KA vs SP)								Inter-subspecies (FR vs KA)								Inter-species (FR-KA vs SP)								Inter-subspecies (FR vs KA)								Inter-species (FR-KA vs SP)								Inter-subspecies (FR vs KA)
Male-specific DE genes				Female-specific DE genes				Male-specific DE genes				Female-specific DE genes				Male-specific DE genes				Female-specific DE genes				Male-specific DE genes				Female-specific DE genes				Male-specific DE genes				Female-specific DE genes				Male-specific DE genes				Female-specific DE genes				Male-specific DE genes
GO_ID	Description	pvalue	FDR	GO_ID	Description	pvalue	FDR	GO_ID	Description	pvalue	FDR	GO_ID	Description	pvalue	FDR	GO_ID	Description	pvalue	FDR	GO_ID	Description	pvalue	FDR	GO_ID	Description	pvalue	FDR	GO_ID	Description	pvalue	FDR	GO_ID	Description	pvalue	FDR	GO_ID	Description	pvalue	FDR	GO_ID	Description	pvalue	FDR	GO_ID	Description	pvalue	FDR	GO_ID	Description
GO:0001667	ameboidal-type cell migration	2.32892e-11	1.38035e-07	GO:0016358	dendrite development	2.09563e-07	0.000675557	GO:0007409	axonogenesis	4.98235e-12	2.93261e-08	GO:0070507	regulation of microtubule cytoskeleton organization	1.88728e-06	0.00588968	GO:0000280	nuclear division	2.47991e-11	1.40462e-07	GO:0009060	aerobic respiration	2.33064e-28	1.47227e-24	GO:0042113	B cell activation	2.48616e-14	1.47678e-10	GO:1901987	regulation of cell cycle phase transition	1.58682e-07	0.000641036	GO:0006397	mRNA processing	2.23101e-12	1.40308e-08	GO:0007265	Ras protein signal transduction	5.7557e-08	0.000339654	GO:0042060	wound healing	2.93736e-09	1.79149e-05	GO:0006887	exocytosis	9.50734e-08	0.000584987	GO:0007264	small GTPase mediated signal transduction
GO:0001503	ossification	4.41578e-07	0.00130862	GO:0099173	postsynapse organization	2.3683e-07	0.000675557	GO:0050767	regulation of neurogenesis	3.08169e-08	9.06941e-05	GO:1902903	regulation of supramolecular fiber organization	2.05108e-06	0.00588968	GO:0007059	chromosome segregation	3.40745e-10	9.6499e-07	GO:0045333	cellular respiration	7.88001e-27	2.4889e-23	GO:0050867	positive regulation of cell activation	1.25328e-10	3.72224e-07	GO:0031589	cell-substrate adhesion	2.28615e-07	0.000641036	GO:0008380	RNA splicing	2.3145e-11	7.27794e-08	GO:0006979	response to oxidative stress	1.30461e-07	0.000339654	GO:0099173	postsynapse organization	3.04368e-07	0.000928171	GO:0051402	neuron apoptotic process	2.58064e-07	0.000592895	GO:0042060	wound healing
GO:0048762	mesenchymal cell differentiation	9.37874e-07	0.00185293	GO:0050807	regulation of synapse organization	4.69409e-07	0.00089266	GO:0001667	ameboidal-type cell migration	2.89756e-07	0.000499957	GO:1902904	negative regulation of supramolecular fiber organization	3.94351e-06	0.0075492	GO:0140014	mitotic nuclear division	6.44681e-09	1.21716e-05	GO:0006119	oxidative phosphorylation	1.14438e-25	2.40969e-22	GO:0007059	chromosome segregation	3.97828e-10	6.2103e-07	GO:0007264	small GTPase mediated signal transduction	4.78357e-07	0.000777008	GO:0018394	peptidyl-lysine acetylation	5.07756e-10	1.06443e-06	GO:0071560	cellular response to transforming growth factor beta stimulus	2.20953e-07	0.000339654	GO:0043161	proteasome-mediated ubiquitin-dependent protein catabolic process	7.59924e-07	0.00154493	GO:0048638	regulation of developmental growth	3.76181e-07	0.000592895	GO:0030010	establishment of cell polarity
GO:0060537	muscle tissue development	1.51434e-06	0.00224387	GO:0060996	dendritic spine development	7.51885e-07	0.00107238	GO:0048762	mesenchymal cell differentiation	3.57054e-07	0.000499957	GO:1901880	negative regulation of protein depolymerization	6.57e-06	0.00862861	GO:0140694	non-membrane-bounded organelle assembly	3.07339e-08	3.69881e-05	GO:0015986	proton motive force-driven ATP synthesis	1.12139e-21	1.77096e-18	GO:0051251	positive regulation of lymphocyte activation	4.18202e-10	6.2103e-07	GO:0016032	viral process	5.54214e-07	0.000777008	GO:0006475	internal protein amino acid acetylation	8.51115e-10	1.07053e-06	GO:0034599	cellular response to oxidative stress	2.24379e-07	0.000339654	GO:0034976	response to endoplasmic reticulum stress	1.16749e-06	0.00178014	GO:0070997	neuron death	3.85435e-07	0.000592895	GO:0003018	vascular process in circulatory system
GO:0010634	positive regulation of epithelial cell migration	2.51812e-06	0.00296488	GO:0050803	regulation of synapse structure or activity	9.76801e-07	0.00111453	GO:0042063	gliogenesis	4.247e-07	0.000499957	GO:0043393	regulation of protein binding	7.51228e-06	0.00862861	GO:0098813	nuclear chromosome segregation	3.2652e-08	3.69881e-05	GO:0006754	ATP biosynthetic process	2.42044e-21	2.92952e-18	GO:0046651	lymphocyte proliferation	6.88495e-10	8.17932e-07	GO:0051056	regulation of small GTPase mediated signal transduction	8.21031e-07	0.000920868	GO:0018393	internal peptidyl-lysine acetylation	8.51115e-10	1.07053e-06	GO:0007264	small GTPase mediated signal transduction	3.18666e-07	0.000358412	GO:0016358	dendrite development	2.0983e-06	0.0025595	GO:0009141	nucleoside triphosphate metabolic process	7.08044e-07	0.000871319	GO:0032970	regulation of actin filament-based process
GO:0010631	epithelial cell migration	3.55813e-06	0.00296488	GO:0007585	respiratory gaseous exchange by respiratory system	3.86702e-06	0.00367689	GO:0060485	mesenchyme development	7.59514e-07	0.000745083	GO:0010469	regulation of signaling receptor activity	1.40806e-05	0.012617	GO:0000070	mitotic sister chromatid segregation	5.92507e-08	5.59327e-05	GO:0009145	purine nucleoside triphosphate biosynthetic process	2.78251e-21	2.92952e-18	GO:0032943	mononuclear cell proliferation	1.34853e-09	1.18114e-06	GO:0090287	regulation of cellular response to growth factor stimulus	1.28827e-06	0.00120411	GO:0016573	histone acetylation	1.73989e-09	1.59493e-06	GO:0071559	response to transforming growth factor beta	3.55157e-07	0.000358412	GO:0043087	regulation of GTPase activity	3.0974e-06	0.00314851	GO:0072659	protein localization to plasma membrane	1.47907e-06	0.0011931	GO:1902903	regulation of supramolecular fiber organization
GO:0014033	neural crest cell differentiation	4.21724e-06	0.00296488	GO:0007409	axonogenesis	1.36255e-05	0.0111048	GO:0002040	sprouting angiogenesis	2.27729e-06	0.00158205	GO:0010639	negative regulation of organelle organization	1.74796e-05	0.012617	GO:0051225	spindle assembly	1.76987e-07	0.000140475	GO:0006091	generation of precursor metabolites and energy	3.63341e-21	3.27889e-18	GO:0002696	positive regulation of leukocyte activation	1.39192e-09	1.18114e-06	GO:0007265	Ras protein signal transduction	2.23133e-06	0.00178761	GO:0018205	peptidyl-lysine modification	1.77525e-09	1.59493e-06	GO:0001667	ameboidal-type cell migration	4.72201e-07	0.000408454	GO:0010876	lipid localization	4.05352e-06	0.00353178	GO:0034976	response to endoplasmic reticulum stress	1.53511e-06	0.0011931	GO:0007599	hemostasis
GO:0090132	epithelium migration	4.22324e-06	0.00296488	GO:0099601	regulation of neurotransmitter receptor activity	1.68732e-05	0.0120327	GO:0007269	neurotransmitter secretion	2.41904e-06	0.00158205	GO:0032886	regulation of microtubule-based process	1.91564e-05	0.012617	GO:0007051	spindle organization	1.98411e-07	0.000140475	GO:0015980	energy derivation by oxidation of organic compounds	4.16127e-21	3.28585e-18	GO:0007159	leukocyte cell-cell adhesion	2.28694e-09	1.69805e-06	GO:1901990	regulation of mitotic cell cycle phase transition	2.59068e-06	0.00181607	GO:0016570	histone modification	3.61184e-09	2.83936e-06	GO:0051056	regulation of small GTPase mediated signal transduction	5.93252e-07	0.000413451	GO:0050803	regulation of synapse structure or activity	5.58268e-06	0.00406263	GO:1901214	regulation of neuron death	1.77995e-06	0.0011931	GO:0007265	Ras protein signal transduction
GO:0003151	outflow tract morphogenesis	4.91104e-06	0.00296488	GO:0007269	neurotransmitter secretion	2.35047e-05	0.0128513	GO:0099643	signal release from synapse	2.41904e-06	0.00158205	GO:0051261	protein depolymerization	1.97724e-05	0.012617	GO:0000819	sister chromatid segregation	2.65071e-07	0.000166818	GO:0009206	purine ribonucleoside triphosphate biosynthetic process	1.12283e-20	7.881e-18	GO:0070661	leukocyte proliferation	3.53281e-09	2.33166e-06	GO:0001890	placenta development	3.44678e-06	0.00214773	GO:0009895	negative regulation of catabolic process	8.57619e-09	5.99285e-06	GO:0046578	regulation of Ras protein signal transduction	6.14543e-07	0.000413451	GO:0032963	collagen metabolic process	6.96089e-06	0.00406263	GO:0010821	regulation of mitochondrion organization	1.88422e-06	0.0011931	GO:0022411	cellular component disassembly
GO:0090130	tissue migration	5.00232e-06	0.00296488	GO:0099643	signal release from synapse	2.35047e-05	0.0128513	GO:0001505	regulation of neurotransmitter levels	3.60037e-06	0.00211918	GO:1903818	positive regulation of voltage-gated potassium channel activity	2.21984e-05	0.0127486	GO:1902850	microtubule cytoskeleton organization involved in mitosis	3.98748e-07	0.000225851	GO:0009201	ribonucleoside triphosphate biosynthetic process	2.17525e-20	1.37411e-17	GO:1903037	regulation of leukocyte cell-cell adhesion	4.38608e-09	2.60533e-06	GO:0007178	transmembrane receptor protein serine/threonine kinase signaling pathway	4.96453e-06	0.00278411	GO:0006473	protein acetylation	1.02872e-08	6.46962e-06	GO:0001776	leukocyte homeostasis	8.30851e-07	0.00050308	GO:0010714	positive regulation of collagen metabolic process	7.06921e-06	0.00406263	GO:0043523	regulation of neuron apoptotic process	1.93905e-06	0.0011931	GO:0034248	regulation of amide metabolic process
GO:0014032	neural crest cell development	5.8991e-06	0.00302535	GO:0097061	dendritic spine organization	2.81656e-05	0.0128513	GO:0097485	neuron projection guidance	4.3789e-06	0.00234311	GO:0099601	regulation of neurotransmitter receptor activity	2.4852e-05	0.0128188	GO:1903046	meiotic cell cycle process	4.29393e-06	0.00221098	GO:0009260	ribonucleotide biosynthetic process	3.1467e-20	1.73558e-17	GO:0030098	lymphocyte differentiation	5.16299e-09	2.78802e-06	GO:1901988	negative regulation of cell cycle phase transition	5.99676e-06	0.00305726	GO:0001666	response to hypoxia	1.46476e-08	8.37446e-06	GO:0072001	renal system development	1.01085e-06	0.00054199	GO:0007265	Ras protein signal transduction	7.32726e-06	0.00406263	GO:0010822	positive regulation of mitochondrion organization	2.33651e-06	0.00130696	GO:0072001	renal system development
GO:0034248	regulation of amide metabolic process	6.12523e-06	0.00302535	GO:0048813	dendrite morphogenesis	2.84474e-05	0.0128513	GO:0090287	regulation of cellular response to growth factor stimulus	4.79173e-06	0.00235034	GO:0051494	negative regulation of cytoskeleton organization	2.67848e-05	0.0128188	GO:0070670	response to interleukin-4	9.27727e-06	0.00409246	GO:0046390	ribose phosphate biosynthetic process	3.29697e-20	1.73558e-17	GO:0050864	regulation of B cell activation	7.18832e-09	3.55822e-06	GO:0051701	biological process involved in interaction with host	7.23379e-06	0.00338059	GO:0006401	RNA catabolic process	2.54598e-08	1.1572e-05	GO:0001822	kidney development	1.17215e-06	0.00054199	GO:0050807	regulation of synapse organization	1.13617e-05	0.00532953	GO:0045444	fat cell differentiation	3.31052e-06	0.00162123	GO:0035904	aorta development
GO:2000112	regulation of cellular macromolecule biosynthetic process	7.88353e-06	0.00359428	GO:0106027	neuron projection organization	2.92843e-05	0.0128513	GO:0009100	glycoprotein metabolic process	6.47708e-06	0.00293262	GO:0043242	negative regulation of protein-containing complex disassembly	3.28937e-05	0.0130539	GO:0032652	regulation of interleukin-1 production	9.393e-06	0.00409246	GO:0009142	nucleoside triphosphate biosynthetic process	4.32223e-20	2.10027e-17	GO:0042100	B cell proliferation	8.79608e-09	4.01913e-06	GO:0045786	negative regulation of cell cycle	9.29362e-06	0.00365504	GO:0010563	negative regulation of phosphorus metabolic process	2.57605e-08	1.1572e-05	GO:0032964	collagen biosynthetic process	1.22604e-06	0.00054199	GO:0050890	cognition	1.289e-05	0.00532953	GO:1990778	protein localization to cell periphery	3.42531e-06	0.00162123	GO:0007596	blood coagulation
GO:0060485	mesenchyme development	9.45058e-06	0.00392087	GO:0060997	dendritic spine morphogenesis	3.44529e-05	0.0140396	GO:0009101	glycoprotein biosynthetic process	9.39258e-06	0.00366562	GO:0007409	axonogenesis	3.30949e-05	0.0130539	GO:0007052	mitotic spindle organization	1.21482e-05	0.00476228	GO:0006164	purine nucleotide biosynthetic process	1.15853e-19	5.22747e-17	GO:0050863	regulation of T cell activation	1.48266e-08	6.05881e-06	GO:0010948	negative regulation of cell cycle process	9.32384e-06	0.00365504	GO:0045936	negative regulation of phosphate metabolic process	2.57605e-08	1.1572e-05	GO:1905314	semi-lunar valve development	1.25777e-06	0.00054199	GO:0007599	hemostasis	1.29136e-05	0.00532953	GO:0030104	water homeostasis	3.84217e-06	0.00168863	GO:0032956	regulation of actin cytoskeleton organization
GO:0060562	epithelial tube morphogenesis	9.9229e-06	0.00392087	GO:1905314	semi-lunar valve development	4.34468e-05	0.0160667	GO:0007411	axon guidance	9.61248e-06	0.00366562	GO:0044772	mitotic cell cycle phase transition	3.40951e-05	0.0130539	GO:0010508	positive regulation of autophagy	1.2612e-05	0.00476228	GO:0009152	purine ribonucleotide biosynthetic process	2.03997e-19	8.59101e-17	GO:0098813	nuclear chromosome segregation	1.53e-08	6.05881e-06	GO:0090092	regulation of transmembrane receptor protein serine/threonine kinase signaling pathway	9.96577e-06	0.00365504	GO:0044270	cellular nitrogen compound catabolic process	7.12729e-08	2.98824e-05	GO:0072006	nephron development	1.38085e-06	0.00054199	GO:0032967	positive regulation of collagen biosynthetic process	1.39325e-05	0.00532953	GO:0019319	hexose biosynthetic process	4.74227e-06	0.00194528	GO:0090162	establishment of epithelial cell polarity
GO:0006417	regulation of translation	1.0735e-05	0.00397664	GO:0060998	regulation of dendritic spine development	4.65885e-05	0.0160667	GO:0006836	neurotransmitter transport	9.96432e-06	0.00366562	GO:0016358	dendrite development	4.94724e-05	0.0177575	GO:0006397	mRNA processing	1.41825e-05	0.00502061	GO:0072522	purine-containing compound biosynthetic process	3.22728e-19	1.27417e-16	GO:0002253	activation of immune response	1.84702e-08	6.55647e-06	GO:0044000	movement in host	1.04281e-05	0.00365504	GO:0043543	protein acylation	1.0085e-07	3.80152e-05	GO:0022409	positive regulation of cell-cell adhesion	1.51768e-06	0.00054199	GO:0097193	intrinsic apoptotic signaling pathway	1.43614e-05	0.00532953	GO:0006836	neurotransmitter transport	5.13673e-06	0.00197539	GO:0050817	coagulation
GO:0006486	protein glycosylation	1.34545e-05	0.00443027	GO:0099175	regulation of postsynapse organization	4.78761e-05	0.0160667	GO:1903358	regulation of Golgi organization	1.15474e-05	0.00399812	GO:1901879	regulation of protein depolymerization	5.82273e-05	0.0196706	GO:0010506	regulation of autophagy	1.86145e-05	0.0062019	GO:0042776	proton motive force-driven mitochondrial ATP synthesis	6.99534e-19	2.59939e-16	GO:0050670	regulation of lymphocyte proliferation	1.87643e-08	6.55647e-06	GO:0062012	regulation of small molecule metabolic process	1.33196e-05	0.00389078	GO:0042326	negative regulation of phosphorylation	1.0276e-07	3.80152e-05	GO:0072073	kidney epithelium development	1.52169e-06	0.00054199	GO:0007264	small GTPase mediated signal transduction	1.5238e-05	0.00532953	GO:0010563	negative regulation of phosphorus metabolic process	5.81669e-06	0.00198834	GO:0003007	heart morphogenesis
GO:0043413	macromolecule glycosylation	1.34545e-05	0.00443027	GO:0006486	protein glycosylation	8.04923e-05	0.0241689	GO:0010631	epithelial cell migration	1.7308e-05	0.00537192	GO:0022411	cellular component disassembly	6.77777e-05	0.0216249	GO:0032612	interleukin-1 production	1.99402e-05	0.00627451	GO:0009165	nucleotide biosynthetic process	1.84987e-18	6.49201e-16	GO:0002443	leukocyte mediated immunity	2.10858e-08	6.95832e-06	GO:0044851	hair cycle phase	1.36544e-05	0.00389078	GO:0051348	negative regulation of transferase activity	1.23773e-07	4.23107e-05	GO:0032635	interleukin-6 production	1.66997e-06	0.000546322	GO:0007611	learning or memory	1.57291e-05	0.00532953	GO:0045936	negative regulation of phosphate metabolic process	5.81669e-06	0.00198834	GO:0051495	positive regulation of cytoskeleton organization
GO:0090497	mesenchymal cell migration	1.46745e-05	0.00457768	GO:0043413	macromolecule glycosylation	8.04923e-05	0.0241689	GO:0050770	regulation of axonogenesis	1.80333e-05	0.00537192	GO:0007411	axon guidance	7.97463e-05	0.0225515	GO:0051783	regulation of nuclear division	2.22938e-05	0.00664589	GO:1901293	nucleoside phosphate biosynthetic process	5.33397e-18	1.77341e-15	GO:0032944	regulation of mononuclear cell proliferation	3.03945e-08	9.50227e-06	GO:0019058	viral life cycle	1.43756e-05	0.00389078	GO:0071456	cellular response to hypoxia	1.27827e-07	4.23107e-05	GO:0062197	cellular response to chemical stress	1.71431e-06	0.000546322	GO:0001666	response to hypoxia	1.74768e-05	0.00541284	GO:0009144	purine nucleoside triphosphate metabolic process	6.60634e-06	0.00213941	GO:1901653	cellular response to peptide
GO:0034329	cell junction assembly	1.67166e-05	0.00495396	GO:0070085	glycosylation	9.3629e-05	0.0267077	GO:0050769	positive regulation of neurogenesis	1.82532e-05	0.00537192	GO:0051656	establishment of organelle localization	7.996e-05	0.0225515	GO:0031331	positive regulation of cellular catabolic process	2.47848e-05	0.00701906	GO:0042113	B cell activation	6.60974e-17	2.08769e-14	GO:0030888	regulation of B cell proliferation	3.26528e-08	9.69789e-06	GO:0043903	regulation of biological process involved in symbiotic interaction	1.45001e-05	0.00389078	GO:0046700	heterocycle catabolic process	1.41381e-07	4.44573e-05	GO:0048872	homeostasis of number of cells	2.24477e-06	0.000679604	GO:0036503	ERAD pathway	1.77499e-05	0.00541284	GO:0042326	negative regulation of phosphorylation	7.14428e-06	0.00214947	GO:0031647	regulation of protein stability
GO:0042063	gliogenesis	2.01082e-05	0.0054551	GO:0031346	positive regulation of cell projection organization	0.000130021	0.034452	GO:0090132	epithelium migration	2.02574e-05	0.00567787	GO:0097485	neuron projection guidance	8.60001e-05	0.0225515	GO:0042060	wound healing	2.99458e-05	0.00797364	GO:0009144	purine nucleoside triphosphate metabolic process	2.64012e-16	7.58244e-14	GO:0022409	positive regulation of cell-cell adhesion	4.33908e-08	1.22734e-05	GO:0045444	fat cell differentiation	1.45696e-05	0.00389078	GO:0000375	RNA splicing, via transesterification reactions	1.72634e-07	4.72041e-05	GO:0005996	monosaccharide metabolic process	2.50636e-06	0.000722668	GO:0006869	lipid transport	1.88216e-05	0.00544513	GO:0009199	ribonucleoside triphosphate metabolic process	7.33606e-06	0.00214947	GO:0003229	ventricular cardiac muscle tissue development
GO:0006397	mRNA processing	2.02484e-05	0.0054551	GO:0006066	alcohol metabolic process	0.000132856	0.034452	GO:0051962	positive regulation of nervous system development	2.16126e-05	0.00578236	GO:0050767	regulation of neurogenesis	8.63892e-05	0.0225515	GO:0071353	cellular response to interleukin-4	3.7652e-05	0.00797364	GO:0046034	ATP metabolic process	2.64071e-16	7.58244e-14	GO:1903039	positive regulation of leukocyte cell-cell adhesion	5.01906e-08	1.2969e-05	GO:0071498	cellular response to fluid shear stress	1.8561e-05	0.00468237	GO:0000377	RNA splicing, via transesterification reactions with bulged adenosine as nucleophile	1.72634e-07	4.72041e-05	GO:0050867	positive regulation of cell activation	2.7388e-06	0.00073404	GO:0030323	respiratory tube development	1.96414e-05	0.00544513	GO:2001233	regulation of apoptotic signaling pathway	9.29631e-06	0.00260001	GO:0051090	regulation of DNA-binding transcription factor activity
GO:0071560	cellular response to transforming growth factor beta stimulus	2.12387e-05	0.00547311	GO:0003184	pulmonary valve morphogenesis	0.000144641	0.0345634	GO:0090130	tissue migration	2.36629e-05	0.00605565	GO:0051098	regulation of binding	0.000145169	0.0346903	GO:0006605	protein targeting	3.78242e-05	0.00797364	GO:0009205	purine ribonucleoside triphosphate metabolic process	6.79386e-16	1.86595e-13	GO:0050870	positive regulation of T cell activation	5.02166e-08	1.2969e-05	GO:0044848	biological phase	2.0465e-05	0.00468237	GO:0000398	mRNA splicing, via spliceosome	1.72634e-07	4.72041e-05	GO:0000302	response to reactive oxygen species	2.78826e-06	0.00073404	GO:0097061	dendritic spine organization	2.10378e-05	0.00557868	GO:0003014	renal system process	9.88881e-06	0.00262303	GO:0048771	tissue remodeling
GO:0003007	heart morphogenesis	2.2971e-05	0.00567289	GO:0003002	regionalization	0.000148632	0.0345634	GO:0010717	regulation of epithelial to mesenchymal transition	3.13254e-05	0.00673175	GO:0031111	negative regulation of microtubule polymerization or depolymerization	0.000146085	0.0346903	GO:0002831	regulation of response to biotic stimulus	3.78593e-05	0.00797364	GO:0009199	ribonucleoside triphosphate metabolic process	1.13021e-15	2.9748e-13	GO:0050851	antigen receptor-mediated signaling pathway	5.49903e-08	1.36101e-05	GO:0017015	regulation of transforming growth factor beta receptor signaling pathway	2.08491e-05	0.00468237	GO:0034504	protein localization to nucleus	2.27365e-07	5.91596e-05	GO:0046579	positive regulation of Ras protein signal transduction	2.9428e-06	0.000742443	GO:0061041	regulation of wound healing	2.54967e-05	0.00646344	GO:0046364	monosaccharide biosynthetic process	1.05448e-05	0.00262303	GO:0060840	artery development
GO:0043406	positive regulation of MAP kinase activity	2.95109e-05	0.0068765	GO:0051963	regulation of synapse assembly	0.000151461	0.0345634	GO:0001837	epithelial to mesenchymal transition	3.14724e-05	0.00673175	GO:0033673	negative regulation of kinase activity	0.000165024	0.0346903	GO:0006914	autophagy	3.78593e-05	0.00797364	GO:0002757	immune response-activating signaling pathway	1.29325e-15	3.26779e-13	GO:0070663	regulation of leukocyte proliferation	5.74851e-08	1.36585e-05	GO:0046718	viral entry into host cell	2.15411e-05	0.00468237	GO:1901216	positive regulation of neuron death	2.35171e-07	5.91596e-05	GO:0051057	positive regulation of small GTPase mediated signal transduction	3.20747e-06	0.000776849	GO:0030198	extracellular matrix organization	2.64938e-05	0.00646344	GO:0071900	regulation of protein serine/threonine kinase activity	1.06575e-05	0.00262303	GO:0051056	regulation of small GTPase mediated signal transduction
GO:0071559	response to transforming growth factor beta	3.05628e-05	0.0068765	GO:0046165	alcohol biosynthetic process	0.000186844	0.039695	GO:0034329	cell junction assembly	3.19561e-05	0.00673175	GO:0033572	transferrin transport	0.00016572	0.0346903	GO:0061919	process utilizing autophagic mechanism	3.78593e-05	0.00797364	GO:0002764	immune response-regulating signaling pathway	1.34719e-15	3.27314e-13	GO:0045621	positive regulation of lymphocyte differentiation	7.51888e-08	1.67992e-05	GO:0007179	transforming growth factor beta receptor signaling pathway	2.17086e-05	0.00468237	GO:0034655	nucleobase-containing compound catabolic process	2.88558e-07	6.975e-05	GO:0050670	regulation of lymphocyte proliferation	3.65911e-06	0.000822531	GO:0016050	vesicle organization	2.97204e-05	0.00663937	GO:0001505	regulation of neurotransmitter levels	1.4282e-05	0.00337988	GO:0007162	negative regulation of cell adhesion
GO:0048864	stem cell development	3.13254e-05	0.0068765	GO:0003179	heart valve morphogenesis	0.000187864	0.039695	GO:0050807	regulation of synapse organization	3.27499e-05	0.00673175	GO:0060717	chorion development	0.00016572	0.0346903	GO:0045786	negative regulation of cell cycle	3.88172e-05	0.00797364	GO:0019693	ribose phosphate metabolic process	1.53053e-15	3.50007e-13	GO:0002757	immune response-activating signaling pathway	7.63599e-08	1.67992e-05	GO:0051098	regulation of binding	2.85893e-05	0.00582812	GO:0006470	protein dephosphorylation	2.99451e-07	6.975e-05	GO:0030198	extracellular matrix organization	4.00996e-06	0.000822531	GO:0030324	lung development	3.15092e-05	0.00663937	GO:0006338	chromatin remodeling	1.49806e-05	0.00341392	GO:0001822	kidney development
GO:0007517	muscle organ development	3.54499e-05	0.00750398	GO:2000311	regulation of AMPA receptor activity	0.000205431	0.0418566	GO:0048638	regulation of developmental growth	3.27946e-05	0.00673175	GO:0045879	negative regulation of smoothened signaling pathway	0.000173116	0.0346903	GO:0140013	meiotic nuclear division	3.94177e-05	0.00797364	GO:0009259	ribonucleotide metabolic process	1.5514e-15	3.50007e-13	GO:0045619	regulation of lymphocyte differentiation	8.24709e-08	1.74432e-05	GO:1903844	regulation of cellular response to transforming growth factor beta stimulus	2.9099e-05	0.00582812	GO:1901361	organic cyclic compound catabolic process	3.23502e-07	7.26608e-05	GO:0072210	metanephric nephron development	4.04426e-06	0.000822531	GO:0043062	extracellular structure organization	3.15694e-05	0.00663937	GO:0031346	positive regulation of cell projection organization	1.65058e-05	0.00353409	GO:1902003	regulation of amyloid-beta formation
GO:0001755	neural crest cell migration	4.11308e-05	0.00789692	GO:0007015	actin filament organization	0.00022878	0.0434153	GO:0002042	cell migration involved in sprouting angiogenesis	3.3167e-05	0.00673175	GO:0031110	regulation of microtubule polymerization or depolymerization	0.000175252	0.0346903	GO:0048066	developmental pigmentation	4.52988e-05	0.00884732	GO:0009141	nucleoside triphosphate metabolic process	1.82672e-15	3.97911e-13	GO:0030183	B cell differentiation	8.51606e-08	1.74432e-05	GO:0044409	entry into host	3.69924e-05	0.00715357	GO:0031330	negative regulation of cellular catabolic process	3.89923e-07	8.45596e-05	GO:0032675	regulation of interleukin-6 production	4.07243e-06	0.000822531	GO:0045229	external encapsulating structure organization	3.15694e-05	0.00663937	GO:0072583	clathrin-dependent endocytosis	1.66567e-05	0.00353409	GO:0007163	establishment or maintenance of cell polarity
GO:1901861	regulation of muscle tissue development	4.12414e-05	0.00789692	GO:0001764	neuron migration	0.000229657	0.0434153	GO:1902903	regulation of supramolecular fiber organization	3.52875e-05	0.00673497	GO:0048732	gland development	0.000181213	0.0346903	GO:0009615	response to virus	4.78547e-05	0.00903497	GO:0009150	purine ribonucleotide metabolic process	2.63672e-15	5.55204e-13	GO:0072594	establishment of protein localization to organelle	1.54386e-07	3.05684e-05	GO:0044403	biological process involved in symbiotic interaction	4.20754e-05	0.00786529	GO:0006631	fatty acid metabolic process	4.32529e-07	9.06726e-05	GO:0070663	regulation of leukocyte proliferation	4.0753e-06	0.000822531	GO:0060541	respiratory system development	3.31475e-05	0.00670407	GO:0099003	vesicle-mediated transport in synapse	2.20421e-05	0.00452083	GO:0050767	regulation of neurogenesis
GO:0033674	positive regulation of kinase activity	4.13033e-05	0.00789692	GO:1901617	organic hydroxy compound biosynthetic process	0.000243762	0.0434153	GO:0043542	endothelial cell migration	3.54713e-05	0.00673497	GO:0050770	regulation of axonogenesis	0.000195252	0.036172	GO:0071900	regulation of protein serine/threonine kinase activity	5.14032e-05	0.00914149	GO:0033108	mitochondrial respiratory chain complex assembly	1.09154e-14	2.22428e-12	GO:0140014	mitotic nuclear division	1.66192e-07	3.18445e-05	GO:0043547	positive regulation of GTPase activity	4.53181e-05	0.00795761	GO:0002181	cytoplasmic translation	5.05937e-07	0.00010264	GO:0003177	pulmonary valve development	4.3602e-06	0.000851645	GO:0022604	regulation of cell morphogenesis	3.40755e-05	0.00670407	GO:0043087	regulation of GTPase activity	2.32212e-05	0.00460903	GO:0035909	aorta morphogenesis
GO:0003002	regionalization	4.32972e-05	0.00801945	GO:0051775	response to redox state	0.000251031	0.0434153	GO:0043534	blood vessel endothelial cell migration	3.99517e-05	0.00691768	GO:0032092	positive regulation of protein binding	0.000208733	0.0373077	GO:0051092	positive regulation of NF-kappaB transcription factor activity	5.16468e-05	0.00914149	GO:0019646	aerobic electron transport chain	2.09032e-14	4.12643e-12	GO:0002764	immune response-regulating signaling pathway	2.03559e-07	3.77856e-05	GO:0071559	response to transforming growth factor beta	4.54072e-05	0.00795761	GO:0034976	response to endoplasmic reticulum stress	5.4957e-07	0.000108008	GO:0043062	extracellular structure organization	4.79133e-06	0.000879136	GO:0006820	monoatomic anion transport	3.86808e-05	0.00737231	GO:0019318	hexose metabolic process	2.40596e-05	0.00462622	GO:0006643	membrane lipid metabolic process
GO:0070085	glycosylation	4.80172e-05	0.00852588	GO:0009101	glycoprotein biosynthetic process	0.000251131	0.0434153	GO:0051588	regulation of neurotransmitter transport	3.99517e-05	0.00691768	GO:1901379	regulation of potassium ion transmembrane transport	0.000225389	0.0373077	GO:0090307	mitotic spindle assembly	5.58788e-05	0.00959083	GO:0042773	ATP synthesis coupled electron transport	2.8848e-14	5.5222e-12	GO:0045582	positive regulation of T cell differentiation	2.35713e-07	4.24283e-05	GO:0033045	regulation of sister chromatid segregation	4.78988e-05	0.00813989	GO:1901653	cellular response to peptide	6.03909e-07	0.00011509	GO:0045229	external encapsulating structure organization	4.79133e-06	0.000879136	GO:0007409	axonogenesis	4.05476e-05	0.00749393	GO:0001558	regulation of cell growth	2.5365e-05	0.00472942	GO:0030168	platelet activation
GO:0006487	protein N-linked glycosylation	5.00884e-05	0.00852588	GO:0007264	small GTPase mediated signal transduction	0.000291662	0.0479437	GO:0031346	positive regulation of cell projection organization	3.99594e-05	0.00691768	GO:0051961	negative regulation of nervous system development	0.000228066	0.0373077	GO:0010639	negative regulation of organelle organization	6.41069e-05	0.0106794	GO:0030098	lymphocyte differentiation	5.72711e-14	1.06406e-11	GO:0034767	positive regulation of monoatomic ion transmembrane transport	3.03974e-07	5.31061e-05	GO:0052372	modulation by symbiont of entry into host	5.42948e-05	0.00895545	GO:0001933	negative regulation of protein phosphorylation	7.21144e-07	0.00013339	GO:0032944	regulation of mononuclear cell proliferation	5.463e-06	0.000896356	GO:0006979	response to oxidative stress	4.27834e-05	0.00767459	GO:0005996	monosaccharide metabolic process	2.91609e-05	0.00522707	GO:0007266	Rho protein signal transduction
GO:0007411	axon guidance	5.16637e-05	0.00852588	GO:0010633	negative regulation of epithelial cell migration	0.000296294	0.0479437	GO:0010594	regulation of endothelial cell migration	4.13725e-05	0.00695768	GO:1901987	regulation of cell cycle phase transition	0.000231105	0.0373077	GO:0072594	establishment of protein localization to organelle	9.08889e-05	0.0147084	GO:0042775	mitochondrial ATP synthesis coupled electron transport	6.86621e-14	1.23925e-11	GO:1904064	positive regulation of cation transmembrane transport	3.60918e-07	6.03785e-05	GO:0046578	regulation of Ras protein signal transduction	5.86201e-05	0.00939261	GO:0044282	small molecule catabolic process	9.04594e-07	0.000162543	GO:0044262	cellular carbohydrate metabolic process	5.52031e-06	0.000896356	GO:0051056	regulation of small GTPase mediated signal transduction	4.54199e-05	0.0077747	GO:0051098	regulation of binding	2.98962e-05	0.00522707	GO:0048144	fibroblast proliferation
GO:0009799	specification of symmetry	5.17853e-05	0.00852588	GO:0021987	cerebral cortex development	0.000302537	0.0479437	GO:0000966	RNA 5'-end processing	4.89456e-05	0.00783939	GO:0051348	negative regulation of transferase activity	0.000233863	0.0373077	GO:0090141	positive regulation of mitochondrial fission	9.35049e-05	0.0147114	GO:0002253	activation of immune response	1.23988e-13	2.17564e-11	GO:0000819	sister chromatid segregation	3.6593e-07	6.03785e-05	GO:0030336	negative regulation of cell migration	6.28116e-05	0.00978466	GO:0016311	dephosphorylation	9.45656e-07	0.000163456	GO:0003184	pulmonary valve morphogenesis	5.5918e-06	0.000896356	GO:1903034	regulation of response to wounding	4.73983e-05	0.0077747	GO:0045926	negative regulation of growth	3.22298e-05	0.00522707	GO:1902004	positive regulation of amyloid-beta formation
GO:0045860	positive regulation of protein kinase activity	5.38652e-05	0.00854921	GO:0034329	cell junction assembly	0.000318279	0.0490753	GO:0002064	epithelial cell development	4.92792e-05	0.00783939	GO:0007026	negative regulation of microtubule depolymerization	0.000244981	0.0380251	GO:0022411	cellular component disassembly	9.76504e-05	0.0149455	GO:0010257	NADH dehydrogenase complex assembly	3.7945e-13	6.30786e-11	GO:0002274	myeloid leukocyte activation	4.72384e-07	7.30855e-05	GO:0031099	regeneration	6.69405e-05	0.00988665	GO:0051604	protein maturation	9.61656e-07	0.000163456	GO:0030214	hyaluronan catabolic process	5.5918e-06	0.000896356	GO:0031589	cell-substrate adhesion	4.82254e-05	0.0077747	GO:0008637	apoptotic mitochondrial changes	3.27187e-05	0.00522707	GO:0001667	ameboidal-type cell migration
GO:0010001	glial cell differentiation	5.56657e-05	0.00854921					GO:0007030	Golgi organization	5.53837e-05	0.00837563	GO:0051962	positive regulation of nervous system development	0.000278639	0.0421111	GO:0032651	regulation of interleukin-1 beta production	0.00010027	0.0149455	GO:0032981	mitochondrial respiratory chain complex I assembly	3.7945e-13	6.30786e-11	GO:0002429	immune response-activating cell surface receptor signaling pathway	4.74894e-07	7.30855e-05	GO:0050792	regulation of viral process	6.69922e-05	0.00988665	GO:0036293	response to decreased oxygen levels	1.06219e-06	0.000175792	GO:0010714	positive regulation of collagen metabolic process	5.62536e-06	0.000896356	GO:0040013	negative regulation of locomotion	4.84405e-05	0.0077747	GO:0045746	negative regulation of Notch signaling pathway	3.28243e-05	0.00522707	GO:0048145	regulation of fibroblast proliferation
GO:0097485	neuron projection guidance	5.62543e-05	0.00854921					GO:0010595	positive regulation of endothelial cell migration	5.58166e-05	0.00837563	GO:0048149	behavioral response to ethanol	0.000288495	0.0424827	GO:0043473	pigmentation	0.000114403	0.0164003	GO:0032943	mononuclear cell proliferation	6.4219e-13	1.04018e-10	GO:0044772	mitotic cell cycle phase transition	4.79854e-07	7.30855e-05	GO:0043542	endothelial cell migration	7.70448e-05	0.0105334	GO:0019439	aromatic compound catabolic process	1.20839e-06	0.000194861	GO:0019318	hexose metabolic process	5.80688e-06	0.000901556	GO:0007596	blood coagulation	5.15797e-05	0.00788635	GO:0008593	regulation of Notch signaling pathway	3.33371e-05	0.00522707	GO:0051098	regulation of binding
GO:0043087	regulation of GTPase activity	6.21136e-05	0.00920369					GO:0042060	wound healing	5.6919e-05	0.00837563	GO:0006469	negative regulation of protein kinase activity	0.000342337	0.0488676	GO:0034341	response to type II interferon	0.000115821	0.0164003	GO:0022904	respiratory electron transport chain	6.87202e-13	1.08526e-10	GO:0002460	adaptive immune response based on somatic recombination of immune receptors built from immunoglobulin superfamily domains	5.0696e-07	7.44554e-05	GO:0061082	myeloid leukocyte cytokine production	7.77405e-05	0.0105334	GO:0022411	cellular component disassembly	1.5928e-06	0.000250429	GO:0005976	polysaccharide metabolic process	6.53561e-06	0.00096874	GO:0030433	ubiquitin-dependent ERAD pathway	5.17223e-05	0.00788635	GO:0050728	negative regulation of inflammatory response	3.39806e-05	0.00522707	GO:0006979	response to oxidative stress
GO:0021915	neural tube development	6.80389e-05	0.00973899					GO:0050803	regulation of synapse structure or activity	6.06622e-05	0.00870872	GO:0000041	transition metal ion transport	0.000363906	0.0488676	GO:0010822	positive regulation of mitochondrion organization	0.000121242	0.0167491	GO:0070661	leukocyte proliferation	1.01009e-12	1.55628e-10	GO:0010563	negative regulation of phosphorus metabolic process	5.26453e-07	7.44554e-05	GO:0044784	metaphase/anaphase transition of cell cycle	7.97902e-05	0.0105334	GO:0032386	regulation of intracellular transport	1.7444e-06	0.000267573	GO:0003176	aortic valve development	6.55959e-06	0.00096874	GO:0061045	negative regulation of wound healing	5.41404e-05	0.00805372	GO:0090199	regulation of release of cytochrome c from mitochondria	3.65406e-05	0.00544523	GO:0140694	non-membrane-bounded organelle assembly
GO:0048754	branching morphogenesis of an epithelial tube	6.90126e-05	0.00973899					GO:0043535	regulation of blood vessel endothelial cell migration	6.5747e-05	0.00921397	GO:0021954	central nervous system neuron development	0.000363906	0.0488676	GO:1901617	organic hydroxy compound biosynthetic process	0.000139123	0.01818	GO:0046651	lymphocyte proliferation	1.53148e-12	2.30342e-10	GO:0045936	negative regulation of phosphate metabolic process	5.26453e-07	7.44554e-05	GO:0071560	cellular response to transforming growth factor beta stimulus	8.2868e-05	0.0105334	GO:0006402	mRNA catabolic process	2.04641e-06	0.000306425	GO:0006109	regulation of carbohydrate metabolic process	6.98934e-06	0.00100398	GO:0051650	establishment of vesicle localization	5.55903e-05	0.00807251	GO:0032102	negative regulation of response to external stimulus	3.85364e-05	0.00544523	GO:0045765	regulation of angiogenesis
GO:0010632	regulation of epithelial cell migration	7.57457e-05	0.0103844					GO:0007015	actin filament organization	7.08088e-05	0.00928831	GO:0031346	positive regulation of cell projection organization	0.00037263	0.0488676	GO:1903008	organelle disassembly	0.000140277	0.01818	GO:0050853	B cell receptor signaling pathway	1.6363e-12	2.40385e-10	GO:0045580	regulation of T cell differentiation	6.75292e-07	9.32846e-05	GO:0010563	negative regulation of phosphorus metabolic process	8.39233e-05	0.0105334	GO:2001020	regulation of response to DNA damage stimulus	2.12865e-06	0.000307191	GO:0003180	aortic valve morphogenesis	7.12981e-06	0.00100398	GO:0071692	protein localization to extracellular region	5.78432e-05	0.00820431	GO:0009205	purine ribonucleoside triphosphate metabolic process	3.89388e-05	0.00544523	GO:1901652	response to peptide
GO:0021532	neural tube patterning	7.70902e-05	0.0103844					GO:0042391	regulation of membrane potential	7.39349e-05	0.00928831	GO:0050768	negative regulation of neurogenesis	0.000374399	0.0488676	GO:2001251	negative regulation of chromosome organization	0.000141229	0.01818	GO:0050851	antigen receptor-mediated signaling pathway	6.10285e-12	8.76175e-10	GO:0000070	mitotic sister chromatid segregation	8.7102e-07	0.000111334	GO:0045936	negative regulation of phosphate metabolic process	8.39233e-05	0.0105334	GO:0016485	protein processing	2.29105e-06	0.000307191	GO:0030212	hyaluronan metabolic process	7.72827e-06	0.00106351	GO:0006091	generation of precursor metabolites and energy	6.09455e-05	0.00830595	GO:0045055	regulated exocytosis	3.89388e-05	0.00544523	GO:0046467	membrane lipid biosynthetic process
GO:0061448	connective tissue development	8.08215e-05	0.0105035					GO:0090050	positive regulation of cell migration involved in sprouting angiogenesis	7.39541e-05	0.00928831	GO:0001894	tissue homeostasis	0.000396184	0.0494628	GO:0007249	I-kappaB kinase/NF-kappaB signaling	0.000149814	0.0188566	GO:0002429	immune response-activating cell surface receptor signaling pathway	9.74829e-12	1.36844e-09	GO:0018108	peptidyl-tyrosine phosphorylation	8.71546e-07	0.000111334	GO:0001892	embryonic placenta development	8.45228e-05	0.0105334	GO:0071900	regulation of protein serine/threonine kinase activity	2.30726e-06	0.000307191	GO:0002253	activation of immune response	8.01965e-06	0.00107909	GO:0016525	negative regulation of angiogenesis	6.16338e-05	0.00830595	GO:0043434	response to peptide hormone	4.00388e-05	0.00547464	GO:0021533	cell differentiation in hindbrain
GO:0043547	positive regulation of GTPase activity	8.5261e-05	0.0105035					GO:0046928	regulation of neurotransmitter secretion	7.52964e-05	0.00928831	GO:0060249	anatomical structure homeostasis	0.000396184	0.0494628	GO:0031349	positive regulation of defense response	0.000162536	0.019972	GO:0022900	electron transport chain	1.09424e-11	1.50268e-09	GO:0034764	positive regulation of transmembrane transport	8.79684e-07	0.000111334	GO:0051983	regulation of chromosome segregation	8.8281e-05	0.0107427	GO:0051403	stress-activated MAPK cascade	2.32311e-06	0.000307191	GO:1903039	positive regulation of leukocyte cell-cell adhesion	8.26958e-06	0.00108853	GO:0150104	transport across blood-brain barrier	6.26453e-05	0.00830595	GO:0140029	exocytic process	4.33827e-05	0.00579359	GO:0034470	ncRNA processing
GO:0150115	cell-substrate junction organization	8.64546e-05	0.0105035					GO:0007264	small GTPase mediated signal transduction	7.53086e-05	0.00928831					GO:0045088	regulation of innate immune response	0.000165829	0.019972	GO:0002697	regulation of immune effector process	1.80567e-11	2.42689e-09	GO:0002449	lymphocyte mediated immunity	8.9349e-07	0.000111334	GO:0003174	mitral valve development	9.19492e-05	0.0107427	GO:0016072	rRNA metabolic process	2.33694e-06	0.000307191	GO:0042098	T cell proliferation	8.83512e-06	0.00113823	GO:0035592	establishment of protein localization to extracellular region	6.78733e-05	0.00868044	GO:0014706	striated muscle tissue development	4.51956e-05	0.00579359	GO:0051057	positive regulation of small GTPase mediated signal transduction
GO:0007389	pattern specification process	8.78482e-05	0.0105035					GO:0010632	regulation of epithelial cell migration	7.57457e-05	0.00928831					GO:0003012	muscle system process	0.000169254	0.019972	GO:0050867	positive regulation of cell activation	2.06665e-11	2.71979e-09	GO:0050853	B cell receptor signaling pathway	8.99669e-07	0.000111334	GO:0003188	heart valve formation	9.19492e-05	0.0107427	GO:0044843	cell cycle G1/S phase transition	2.3446e-06	0.000307191	GO:0042129	regulation of T cell proliferation	9.05724e-06	0.00114253	GO:0060425	lung morphogenesis	6.83163e-05	0.00868044	GO:0099504	synaptic vesicle cycle	4.64435e-05	0.00579359	GO:0003205	cardiac chamber development
GO:0033622	integrin activation	8.82539e-05	0.0105035					GO:0031503	protein-containing complex localization	7.90722e-05	0.00949835					GO:0019884	antigen processing and presentation of exogenous antigen	0.000180038	0.0208109	GO:0010563	negative regulation of phosphorus metabolic process	4.65583e-11	5.88218e-09	GO:0018212	peptidyl-tyrosine modification	1.04688e-06	0.000126908	GO:0044772	mitotic cell cycle phase transition	9.48566e-05	0.0108397	GO:0007032	endosome organization	2.39389e-06	0.000307249	GO:0006112	energy reserve metabolic process	1.03437e-05	0.00124087	GO:0090263	positive regulation of canonical Wnt signaling pathway	7.20151e-05	0.00868855	GO:2000677	regulation of transcription regulatory region DNA binding	4.67425e-05	0.00579359	GO:0071900	regulation of protein serine/threonine kinase activity
GO:0099504	synaptic vesicle cycle	8.97492e-05	0.0105035					GO:0044772	mitotic cell cycle phase transition	8.67604e-05	0.0102134					GO:0051321	meiotic cell cycle	0.000186697	0.021149	GO:0045936	negative regulation of phosphate metabolic process	4.65583e-11	5.88218e-09	GO:1902105	regulation of leukocyte differentiation	1.1107e-06	0.000131951	GO:0001558	regulation of cell growth	9.78111e-05	0.0108397	GO:0043087	regulation of GTPase activity	2.57074e-06	0.000321725	GO:0006909	phagocytosis	1.03577e-05	0.00124087	GO:0006734	NADH metabolic process	7.20909e-05	0.00868855	GO:2001234	negative regulation of apoptotic signaling pathway	4.70794e-05	0.00579359	GO:0010631	epithelial cell migration
GO:0007179	transforming growth factor beta receptor signaling pathway	9.0379e-05	0.0105035					GO:0001764	neuron migration	9.91763e-05	0.0114461					GO:0002478	antigen processing and presentation of exogenous peptide antigen	0.000196301	0.021801	GO:0042326	negative regulation of phosphorylation	6.56187e-11	8.12771e-09	GO:0032640	tumor necrosis factor production	1.26505e-06	0.000147342	GO:0048820	hair follicle maturation	9.8578e-05	0.0108397	GO:0099504	synaptic vesicle cycle	2.609e-06	0.000321725	GO:1903510	mucopolysaccharide metabolic process	1.04516e-05	0.00124087	GO:0050817	coagulation	7.26914e-05	0.00868855	GO:0050891	multicellular organismal-level water homeostasis	4.82031e-05	0.00581556	GO:0018205	peptidyl-lysine modification
GO:0007044	cell-substrate junction assembly	0.000101512	0.0114027					GO:0051932	synaptic transmission, GABAergic	0.0001053	0.0118561					GO:0032611	interleukin-1 beta production	0.00020425	0.0222475	GO:0002768	immune response-regulating cell surface receptor signaling pathway	7.53891e-11	9.15832e-09	GO:1902107	positive regulation of leukocyte differentiation	1.387e-06	0.000155449	GO:2001233	regulation of apoptotic signaling pathway	0.000103405	0.0109882	GO:0034248	regulation of amide metabolic process	3.08622e-06	0.000373255	GO:1903037	regulation of leukocyte cell-cell adhesion	1.06778e-05	0.00124335	GO:0006084	acetyl-CoA metabolic process	7.40785e-05	0.00868855	GO:0007269	neurotransmitter secretion	5.02825e-05	0.00583752	GO:0040013	negative regulation of locomotion
GO:1901888	regulation of cell junction assembly	0.000101964	0.0114027					GO:0099072	regulation of postsynaptic membrane neurotransmitter receptor levels	0.00010799	0.0118561					GO:0098780	response to mitochondrial depolarisation	0.000253115	0.0267189	GO:0007159	leukocyte cell-cell adhesion	8.00069e-11	9.53591e-09	GO:1903708	positive regulation of hemopoiesis	1.387e-06	0.000155449	GO:0046596	regulation of viral entry into host cell	0.000105403	0.0109882	GO:1902808	positive regulation of cell cycle G1/S phase transition	3.49507e-06	0.000414726	GO:0034614	cellular response to reactive oxygen species	1.10537e-05	0.00126284	GO:0015698	inorganic anion transport	7.55766e-05	0.00869701	GO:0099643	signal release from synapse	5.02825e-05	0.00583752	GO:0090075	relaxation of muscle
GO:0007178	transmembrane receptor protein serine/threonine kinase signaling pathway	0.000106661	0.0117071					GO:0048880	sensory system development	0.000108772	0.0118561					GO:0033047	regulation of mitotic sister chromatid segregation	0.000254736	0.0267189	GO:0002699	positive regulation of immune effector process	1.04684e-10	1.22461e-08	GO:0002768	immune response-regulating cell surface receptor signaling pathway	1.44326e-06	0.000155872	GO:1901653	cellular response to peptide	0.000105807	0.0109882	GO:0043967	histone H4 acetylation	3.89407e-06	0.000453515	GO:0033002	muscle cell proliferation	1.17632e-05	0.001319	GO:2000181	negative regulation of blood vessel morphogenesis	8.39319e-05	0.00947964	GO:0017157	regulation of exocytosis	5.6122e-05	0.00639479	GO:0097242	amyloid-beta clearance
GO:0009855	determination of bilateral symmetry	0.000125366	0.0135099					GO:0033002	muscle cell proliferation	0.000111119	0.0118917					GO:1903034	regulation of response to wounding	0.000269462	0.0277497	GO:1903037	regulation of leukocyte cell-cell adhesion	2.33269e-10	2.6792e-08	GO:0005996	monosaccharide metabolic process	1.44326e-06	0.000155872	GO:0002181	cytoplasmic translation	0.000109977	0.0110795	GO:0071559	response to transforming growth factor beta	4.47526e-06	0.000510654	GO:0010631	epithelial cell migration	1.23225e-05	0.00135659	GO:0106027	neuron projection organization	8.64204e-05	0.00958324	GO:0010506	regulation of autophagy	5.96108e-05	0.00666882	GO:1901342	regulation of vasculature development
GO:0048562	embryonic organ morphogenesis	0.000134021	0.0139788					GO:0010001	glial cell differentiation	0.000120086	0.0126219					GO:0051090	regulation of DNA-binding transcription factor activity	0.000295415	0.0298791	GO:0002460	adaptive immune response based on somatic recombination of immune receptors built from immunoglobulin superfamily domains	3.2759e-10	3.67989e-08	GO:0032680	regulation of tumor necrosis factor production	1.52483e-06	0.000161741	GO:0051656	establishment of organelle localization	0.000110637	0.0110795	GO:0034470	ncRNA processing	4.54709e-06	0.000510654	GO:0032967	positive regulation of collagen biosynthetic process	1.28869e-05	0.00137569	GO:0016482	cytosolic transport	9.16381e-05	0.00998038	GO:0022406	membrane docking	6.33786e-05	0.00696373	GO:0001945	lymph vessel development
GO:0003015	heart process	0.000134435	0.0139788					GO:0001654	eye development	0.000133292	0.0137642					GO:0006979	response to oxidative stress	0.000304602	0.0302678	GO:0050864	regulation of B cell activation	3.32047e-10	3.67989e-08	GO:0043270	positive regulation of monoatomic ion transport	1.61878e-06	0.000168693	GO:0090100	positive regulation of transmembrane receptor protein serine/threonine kinase signaling pathway	0.000117681	0.0115782	GO:0042254	ribosome biogenesis	5.05891e-06	0.000549635	GO:0031349	positive regulation of defense response	1.29504e-05	0.00137569	GO:2001242	regulation of intrinsic apoptotic signaling pathway	9.50664e-05	0.0100569	GO:0048738	cardiac muscle tissue development	6.70084e-05	0.00723338	GO:0007409	axonogenesis
GO:0003230	cardiac atrium development	0.00013726	0.0140266					GO:0042692	muscle cell differentiation	0.000138777	0.0140834					GO:0016032	viral process	0.000317924	0.0310469	GO:0032970	regulation of actin filament-based process	4.00742e-10	4.36464e-08	GO:0002263	cell activation involved in immune response	1.70478e-06	0.000174593	GO:1901991	negative regulation of mitotic cell cycle phase transition	0.000122771	0.0116739	GO:0022613	ribonucleoprotein complex biogenesis	5.06898e-06	0.000549635	GO:0051054	positive regulation of DNA metabolic process	1.3396e-05	0.0013985	GO:0010232	vascular transport	9.70982e-05	0.0100569	GO:0002064	epithelial cell development	6.89315e-05	0.00731268	GO:0090132	epithelium migration
GO:0043405	regulation of MAP kinase activity	0.00014727	0.0147944					GO:0010976	positive regulation of neuron projection development	0.000149064	0.0147042					GO:0015980	energy derivation by oxidation of organic compounds	0.000346098	0.0332254	GO:0042098	T cell proliferation	4.46584e-10	4.78148e-08	GO:0006913	nucleocytoplasmic transport	1.78659e-06	0.000176873	GO:0019080	viral gene expression	0.000123446	0.0116739	GO:0006914	autophagy	5.49355e-06	0.000575816	GO:0032965	regulation of collagen biosynthetic process	1.36514e-05	0.00140101	GO:1901343	negative regulation of vasculature development	9.75778e-05	0.0100569	GO:0140056	organelle localization by membrane tethering	7.06862e-05	0.00737173	GO:0007159	leukocyte cell-cell adhesion
GO:0034504	protein localization to nucleus	0.000154368	0.015249					GO:0046390	ribose phosphate biosynthetic process	0.000149889	0.0147042					GO:0010821	regulation of mitochondrion organization	0.000354708	0.0334458	GO:0051251	positive regulation of lymphocyte activation	6.62584e-10	6.94446e-08	GO:0051169	nuclear transport	1.78659e-06	0.000176873	GO:0043062	extracellular structure organization	0.000125457	0.0116739	GO:0061919	process utilizing autophagic mechanism	5.49355e-06	0.000575816	GO:0090132	epithelium migration	1.45553e-05	0.00146887	GO:0019674	NAD metabolic process	0.000100219	0.0100569	GO:0060485	mesenchyme development	7.37732e-05	0.00756544	GO:0050770	regulation of axonogenesis
GO:0051216	cartilage development	0.000163353	0.0158721					GO:1990138	neuron projection extension	0.000155799	0.0150333					GO:0010948	negative regulation of cell cycle process	0.000360204	0.0334458	GO:0002696	positive regulation of leukocyte activation	6.70591e-10	6.94446e-08	GO:0071706	tumor necrosis factor superfamily cytokine production	1.81911e-06	0.00017714	GO:0000075	cell cycle checkpoint signaling	0.000126981	0.0116739	GO:0032872	regulation of stress-activated MAPK cascade	6.29561e-06	0.000649067	GO:0006027	glycosaminoglycan catabolic process	1.50321e-05	0.00149212	GO:0099175	regulation of postsynapse organization	0.000100585	0.0100569	GO:0006094	gluconeogenesis	7.85356e-05	0.00792179	GO:0090130	tissue migration
GO:0016052	carbohydrate catabolic process	0.000175071	0.0167362					GO:0150063	visual system development	0.000159338	0.0151268					GO:2001233	regulation of apoptotic signaling pathway	0.000375607	0.0343135	GO:0051250	negative regulation of lymphocyte activation	7.03911e-10	7.17195e-08	GO:1903555	regulation of tumor necrosis factor superfamily cytokine production	2.20274e-06	0.000208262	GO:0032868	response to insulin	0.000133812	0.011959	GO:0043409	negative regulation of MAPK cascade	6.7542e-06	0.000685116	GO:0090130	tissue migration	1.71564e-05	0.0016631	GO:0060999	positive regulation of dendritic spine development	0.000105392	0.0103675	GO:0071456	cellular response to hypoxia	8.01364e-05	0.00795289	GO:0055010	ventricular cardiac muscle tissue morphogenesis
GO:0048483	autonomic nervous system development	0.000178543	0.0167972					GO:0048588	developmental cell growth	0.000164515	0.0153388					GO:0000266	mitochondrial fission	0.000398452	0.0358228	GO:0050863	regulation of T cell activation	8.21333e-10	8.2355e-08	GO:0050730	regulation of peptidyl-tyrosine phosphorylation	2.20884e-06	0.000208262	GO:0008380	RNA splicing	0.000134347	0.011959	GO:0071824	protein-DNA complex subunit organization	7.24612e-06	0.000723347	GO:0002696	positive regulation of leukocyte activation	1.73039e-05	0.0016631	GO:0044262	cellular carbohydrate metabolic process	0.000109941	0.0106433	GO:0014883	transition between fast and slow fiber	8.1915e-05	0.00800036	GO:0048844	artery morphogenesis
GO:0001843	neural tube closure	0.000189632	0.0175617					GO:0043010	camera-type eye development	0.000166783	0.0153388					GO:0019882	antigen processing and presentation	0.00041052	0.036331	GO:0002695	negative regulation of leukocyte activation	8.85975e-10	8.74485e-08	GO:1903706	regulation of hemopoiesis	2.30121e-06	0.000213581	GO:2000045	regulation of G1/S transition of mitotic cell cycle	0.000139646	0.0119788	GO:0031396	regulation of protein ubiquitination	7.4306e-06	0.000730173	GO:0005977	glycogen metabolic process	1.82392e-05	0.00167655	GO:0009306	protein secretion	0.000112436	0.0107148	GO:0071695	anatomical structure maturation	8.91159e-05	0.00842026	GO:2000112	regulation of cellular macromolecule biosynthetic process
GO:0060606	tube closure	0.000214672	0.0193535					GO:0019081	viral translation	0.000181967	0.0162281					GO:1903706	regulation of hemopoiesis	0.000435523	0.0378333	GO:0001933	negative regulation of protein phosphorylation	9.5755e-10	9.30592e-08	GO:0002366	leukocyte activation involved in immune response	2.76562e-06	0.000252735	GO:0042640	anagen	0.000140239	0.0119788	GO:0051098	regulation of binding	7.71741e-06	0.000745717	GO:0006073	cellular glucan metabolic process	1.82392e-05	0.00167655	GO:0006790	sulfur compound metabolic process	0.000119529	0.0112155	GO:0021700	developmental maturation	9.06153e-05	0.00842026	GO:0071375	cellular response to peptide hormone stimulus
GO:0099003	vesicle-mediated transport in synapse	0.000217106	0.0193535					GO:1904862	inhibitory synapse assembly	0.000181967	0.0162281					GO:0015868	purine ribonucleotide transport	0.000447534	0.0378333	GO:0030217	T cell differentiation	1.44644e-09	1.38442e-07	GO:0000280	nuclear division	2.86914e-06	0.000258223	GO:2000146	negative regulation of cell motility	0.00014158	0.0119788	GO:0000724	double-strand break repair via homologous recombination	7.82594e-06	0.000745717	GO:0048659	smooth muscle cell proliferation	1.82745e-05	0.00167655	GO:0034375	high-density lipoprotein particle remodeling	0.000129309	0.0119493	GO:0006006	glucose metabolic process	9.13616e-05	0.00842026	GO:0071276	cellular response to cadmium ion
GO:0033628	regulation of cell adhesion mediated by integrin	0.000219295	0.0193535					GO:1901342	regulation of vasculature development	0.000191033	0.0166322					GO:0051503	adenine nucleotide transport	0.000447534	0.0378333	GO:0032944	regulation of mononuclear cell proliferation	2.62899e-09	2.4787e-07	GO:0042326	negative regulation of phosphorylation	3.01116e-06	0.00026696	GO:0070936	protein K48-linked ubiquitination	0.000143113	0.0119788	GO:0070997	neuron death	7.9749e-06	0.000748569	GO:0014706	striated muscle tissue development	1.88538e-05	0.00169483	GO:0060996	dendritic spine development	0.000132042	0.0120197	GO:0046034	ATP metabolic process	9.16882e-05	0.00842026	GO:2001044	regulation of integrin-mediated signaling pathway
GO:0009100	glycoprotein metabolic process	0.000222041	0.0193535					GO:0001558	regulation of cell growth	0.000194908	0.0166322					GO:0051651	maintenance of location in cell	0.000454562	0.0378624	GO:0050866	negative regulation of cell activation	2.81705e-09	2.61696e-07	GO:0050866	negative regulation of cell activation	3.08258e-06	0.000269272	GO:1902099	regulation of metaphase/anaphase transition of cell cycle	0.000151009	0.0121656	GO:0090150	establishment of protein localization to membrane	8.28397e-06	0.000766145	GO:0048660	regulation of smooth muscle cell proliferation	1.90343e-05	0.00169483	GO:0036293	response to decreased oxygen levels	0.000134609	0.0120732	GO:0042692	muscle cell differentiation	9.85275e-05	0.00891529	GO:1901214	regulation of neuron death
GO:0030900	forebrain development	0.000238614	0.0204966					GO:0099173	postsynapse organization	0.000194975	0.0166322					GO:0007088	regulation of mitotic nuclear division	0.000481009	0.0392543	GO:0070663	regulation of leukocyte proliferation	2.89918e-09	2.65422e-07	GO:0046364	monosaccharide biosynthetic process	3.18818e-06	0.00027446	GO:0043087	regulation of GTPase activity	0.000151319	0.0121656	GO:0032874	positive regulation of stress-activated MAPK cascade	9.33403e-06	0.000846582	GO:0050870	positive regulation of T cell activation	1.93135e-05	0.00169483	GO:0046496	nicotinamide nucleotide metabolic process	0.000138032	0.0122008	GO:0001836	release of cytochrome c from mitochondria	0.000102918	0.00917764	GO:1902991	regulation of amyloid precursor protein catabolic process
GO:0042326	negative regulation of phosphorylation	0.000244894	0.0207355					GO:0060541	respiratory system development	0.000201495	0.0169428					GO:0051607	defense response to virus	0.000485134	0.0392543	GO:0006120	mitochondrial electron transport, NADH to ubiquinone	3.27436e-09	2.95487e-07	GO:1901987	regulation of cell cycle phase transition	3.31185e-06	0.000281034	GO:0071375	cellular response to peptide hormone stimulus	0.00015258	0.0121656	GO:0043405	regulation of MAP kinase activity	9.42782e-06	0.000846582	GO:0010712	regulation of collagen metabolic process	1.97222e-05	0.00170597	GO:0070633	transepithelial transport	0.000147443	0.0128465	GO:1903076	regulation of protein localization to plasma membrane	0.000106568	0.0092411	GO:0048880	sensory system development
GO:0031331	positive regulation of cellular catabolic process	0.000267519	0.0222096					GO:0040013	negative regulation of locomotion	0.0002084	0.0172767					GO:0043122	regulation of I-kappaB kinase/NF-kappaB signaling	0.000492138	0.0392602	GO:0007162	negative regulation of cell adhesion	4.24968e-09	3.78102e-07	GO:0006909	phagocytosis	3.43218e-06	0.000285649	GO:0001837	epithelial to mesenchymal transition	0.000158034	0.0121656	GO:0070302	regulation of stress-activated protein kinase signaling cascade	9.55753e-06	0.000846582	GO:0002260	lymphocyte homeostasis	2.14073e-05	0.00181698	GO:0019216	regulation of lipid metabolic process	0.000157031	0.0133348	GO:0009165	nucleotide biosynthetic process	0.000107069	0.0092411	GO:0050678	regulation of epithelial cell proliferation
GO:1901862	negative regulation of muscle tissue development	0.000269797	0.0222096					GO:0050678	regulation of epithelial cell proliferation	0.000219156	0.0174429					GO:0007015	actin filament organization	0.000500396	0.0393645	GO:0050670	regulation of lymphocyte proliferation	8.56127e-09	7.51133e-07	GO:0032465	regulation of cytokinesis	3.46242e-06	0.000285649	GO:0048511	rhythmic process	0.000158085	0.0121656	GO:0007015	actin filament organization	9.98256e-06	0.000871949	GO:0060348	bone development	2.16504e-05	0.00181698	GO:0022612	gland morphogenesis	0.00015742	0.0133348	GO:0003205	cardiac chamber development	0.000108136	0.0092411	GO:0001654	eye development
GO:0010959	regulation of metal ion transport	0.000280234	0.0224164					GO:0035088	establishment or maintenance of apical/basal cell polarity	0.000219295	0.0174429					GO:0140546	defense response to symbiont	0.000514285	0.0399029	GO:0030183	B cell differentiation	1.15684e-08	1.00106e-06	GO:0019318	hexose metabolic process	4.11246e-06	0.000334631	GO:0035150	regulation of tube size	0.000158362	0.0121656	GO:0031098	stress-activated protein kinase signaling cascade	1.06839e-05	0.000920425	GO:0044042	glucan metabolic process	2.19058e-05	0.00181698	GO:2000112	regulation of cellular macromolecule biosynthetic process	0.000160973	0.0134163	GO:0003231	cardiac ventricle development	0.000109916	0.00926458	GO:0003206	cardiac chamber morphogenesis
GO:0048511	rhythmic process	0.000287831	0.0224164					GO:0061245	establishment or maintenance of bipolar cell polarity	0.000219295	0.0174429					GO:0051988	regulation of attachment of spindle microtubules to kinetochore	0.000567808	0.0423235	GO:0046631	alpha-beta T cell activation	1.25323e-08	1.06982e-06	GO:0002697	regulation of immune effector process	4.39139e-06	0.000352498	GO:0018210	peptidyl-threonine modification	0.000161767	0.0122097	GO:0006364	rRNA processing	1.10349e-05	0.00093782	GO:0072009	nephron epithelium development	2.22757e-05	0.00182269	GO:0010712	regulation of collagen metabolic process	0.000162782	0.0134163	GO:0051099	positive regulation of binding	0.000119768	0.00995857	GO:1903034	regulation of response to wounding
GO:0060037	pharyngeal system development	0.000289928	0.0224164					GO:0060041	retina development in camera-type eye	0.00024679	0.0189522					GO:1903311	regulation of mRNA metabolic process	0.000577269	0.0423235	GO:0032956	regulation of actin cytoskeleton organization	1.67477e-08	1.4106e-06	GO:0002695	negative regulation of leukocyte activation	5.11158e-06	0.000404837	GO:0001764	neuron migration	0.000164083	0.0122097	GO:0031647	regulation of protein stability	1.22046e-05	0.000990512	GO:0032963	collagen metabolic process	2.57165e-05	0.00207618	GO:0016053	organic acid biosynthetic process	0.000165388	0.0134215	GO:0045786	negative regulation of cell cycle	0.00012961	0.0106283	GO:0034341	response to type II interferon
GO:0045765	regulation of angiogenesis	0.000289935	0.0224164					GO:0030336	negative regulation of cell migration	0.000251547	0.0189522					GO:0015865	purine nucleotide transport	0.000581593	0.0423235	GO:0002700	regulation of production of molecular mediator of immune response	1.76817e-08	1.46968e-06	GO:0006457	protein folding	5.6074e-06	0.000438262	GO:0034446	substrate adhesion-dependent cell spreading	0.000165467	0.0122097	GO:0016054	organic acid catabolic process	1.23552e-05	0.000990512	GO:1901136	carbohydrate derivative catabolic process	2.6874e-05	0.00212195	GO:0008360	regulation of cell shape	0.000167246	0.0134215	GO:1903320	regulation of protein modification by small protein conjugation or removal	0.000131278	0.0106283	GO:0043123	positive regulation of I-kappaB kinase/NF-kappaB signaling
GO:0014706	striated muscle tissue development	0.000291221	0.0224164					GO:0034332	adherens junction organization	0.000252813	0.0189522					GO:2000679	positive regulation of transcription regulatory region DNA binding	0.000581593	0.0423235	GO:0140053	mitochondrial gene expression	2.01059e-08	1.64947e-06	GO:0016064	immunoglobulin mediated immune response	5.97571e-06	0.000460983	GO:0002931	response to ischemia	0.000169861	0.0123712	GO:0046395	carboxylic acid catabolic process	1.23552e-05	0.000990512	GO:0050863	regulation of T cell activation	2.69844e-05	0.00212195	GO:0071456	cellular response to hypoxia	0.000174059	0.0137868	GO:0048278	vesicle docking	0.000135528	0.0108299	GO:0036303	lymph vessel morphogenesis
GO:1903311	regulation of mRNA metabolic process	0.000310284	0.0235776					GO:0043536	positive regulation of blood vessel endothelial cell migration	0.000252813	0.0189522					GO:0046634	regulation of alpha-beta T cell activation	0.000587117	0.0423235	GO:0050727	regulation of inflammatory response	2.17908e-08	1.76478e-06	GO:0007051	spindle organization	6.83928e-06	0.000520838	GO:1902806	regulation of cell cycle G1/S phase transition	0.000175682	0.0126311	GO:0071560	cellular response to transforming growth factor beta stimulus	1.23552e-05	0.000990512	GO:0042692	muscle cell differentiation	2.7414e-05	0.0021281	GO:0035633	maintenance of blood-brain barrier	0.000188415	0.0147326	GO:0009135	purine nucleoside diphosphate metabolic process	0.000144408	0.0112474	GO:0150063	visual system development
GO:0001841	neural tube formation	0.000324244	0.0243265					GO:0001958	endochondral ossification	0.00025759	0.0189522					GO:0002821	positive regulation of adaptive immune response	0.000590317	0.0423235	GO:0032543	mitochondrial translation	2.38462e-08	1.90679e-06	GO:0042692	muscle cell differentiation	7.69015e-06	0.000578221	GO:0007091	metaphase/anaphase transition of mitotic cell cycle	0.000193196	0.0136449	GO:0009100	glycoprotein metabolic process	1.24484e-05	0.000990512	GO:0042060	wound healing	2.82433e-05	0.00216473	GO:0019362	pyridine nucleotide metabolic process	0.000195278	0.0147909	GO:0009179	purine ribonucleoside diphosphate metabolic process	0.000144408	0.0112474	GO:0034976	response to endoplasmic reticulum stress
GO:0006402	mRNA catabolic process	0.000328683	0.0243513					GO:0036075	replacement ossification	0.00025759	0.0189522					GO:0070997	neuron death	0.000601798	0.0426073	GO:0032635	interleukin-6 production	2.69478e-08	2.12787e-06	GO:0051225	spindle assembly	8.23106e-06	0.000611156	GO:0018107	peptidyl-threonine phosphorylation	0.000194648	0.0136449	GO:0045017	glycerolipid biosynthetic process	1.25999e-05	0.000990512	GO:0010634	positive regulation of epithelial cell migration	3.02811e-05	0.0022919	GO:0005996	monosaccharide metabolic process	0.000195688	0.0147909	GO:1904375	regulation of protein localization to cell periphery	0.000148528	0.0114237	GO:1903828	negative regulation of protein localization
GO:0051048	negative regulation of secretion	0.000333859	0.0244294					GO:0007611	learning or memory	0.000266785	0.0192027					GO:0008608	attachment of spindle microtubules to kinetochore	0.000620462	0.0433863	GO:0002702	positive regulation of production of molecular mediator of immune response	2.94246e-08	2.29476e-06	GO:0051146	striated muscle cell differentiation	8.52957e-06	0.000625501	GO:0090288	negative regulation of cellular response to growth factor stimulus	0.000207983	0.0143996	GO:0070304	positive regulation of stress-activated protein kinase signaling cascade	1.31626e-05	0.000996668	GO:0030203	glycosaminoglycan metabolic process	3.08616e-05	0.002307	GO:0033674	positive regulation of kinase activity	0.000196436	0.0147909	GO:1901293	nucleoside phosphate biosynthetic process	0.00015128	0.0114917	GO:1904951	positive regulation of establishment of protein localization
GO:0050731	positive regulation of peptidyl-tyrosine phosphorylation	0.000352644	0.0254893					GO:0031331	positive regulation of cellular catabolic process	0.000267519	0.0192027					GO:0016052	carbohydrate catabolic process	0.000640335	0.0436971	GO:0002263	cell activation involved in immune response	3.40697e-08	2.62461e-06	GO:0019724	B cell mediated immunity	8.65174e-06	0.000626724	GO:0000209	protein polyubiquitination	0.000212507	0.0145334	GO:0031589	cell-substrate adhesion	1.31722e-05	0.000996668	GO:0010632	regulation of epithelial cell migration	3.31351e-05	0.00244674	GO:0032964	collagen biosynthetic process	0.00019918	0.0148146	GO:1902807	negative regulation of cell cycle G1/S phase transition	0.000160856	0.0118977	GO:0032868	response to insulin
GO:0030509	BMP signaling pathway	0.00036602	0.0261374					GO:0009152	purine ribonucleotide biosynthetic process	0.000284634	0.0199104					GO:0033135	regulation of peptidyl-serine phosphorylation	0.000640335	0.0436971	GO:0032675	regulation of interleukin-6 production	3.68209e-08	2.80238e-06	GO:0001659	temperature homeostasis	9.56937e-06	0.000684844	GO:0031334	positive regulation of protein-containing complex assembly	0.000222601	0.0150403	GO:0006979	response to oxidative stress	1.34092e-05	0.000996668	GO:0043536	positive regulation of blood vessel endothelial cell migration	3.46427e-05	0.00252725	GO:0006631	fatty acid metabolic process	0.000211516	0.0155426	GO:0014733	regulation of skeletal muscle adaptation	0.000162058	0.0118977	GO:0045787	positive regulation of cell cycle
GO:0009953	dorsal/ventral pattern formation	0.000373413	0.0263277					GO:0006493	protein O-linked glycosylation	0.000286592	0.0199104					GO:0000959	mitochondrial RNA metabolic process	0.000663215	0.0441936	GO:0072593	reactive oxygen species metabolic process	4.60157e-08	3.46049e-06	GO:0120161	regulation of cold-induced thermogenesis	9.79066e-06	0.000692339	GO:0034405	response to fluid shear stress	0.00023471	0.0154605	GO:0006913	nucleocytoplasmic transport	1.34706e-05	0.000996668	GO:0043255	regulation of carbohydrate biosynthetic process	3.78024e-05	0.00266504	GO:0007266	Rho protein signal transduction	0.000219606	0.0157851	GO:0035265	organ growth	0.000162426	0.0118977	GO:2001046	positive regulation of integrin-mediated signaling pathway
GO:1901342	regulation of vasculature development	0.000379213	0.0263277					GO:0015824	proline transport	0.000287527	0.0199104					GO:0016601	Rac protein signal transduction	0.000663215	0.0441936	GO:0051495	positive regulation of cytoskeleton organization	5.06334e-08	3.76295e-06	GO:0007052	mitotic spindle organization	1.09634e-05	0.000766152	GO:0032869	cellular response to insulin stimulus	0.000237362	0.0154605	GO:0051169	nuclear transport	1.34706e-05	0.000996668	GO:0051146	striated muscle cell differentiation	3.78519e-05	0.00266504	GO:0048308	organelle inheritance	0.000222581	0.0157851	GO:0032535	regulation of cellular component size	0.000167345	0.0121138	GO:0050772	positive regulation of axonogenesis
GO:0001763	morphogenesis of a branching structure	0.000382011	0.0263277					GO:2000146	negative regulation of cell motility	0.000304314	0.0201442					GO:0002833	positive regulation of response to biotic stimulus	0.000676662	0.0445653	GO:0002443	leukocyte mediated immunity	5.17778e-08	3.80326e-06	GO:0043409	negative regulation of MAPK cascade	1.17215e-05	0.000809598	GO:0030198	extracellular matrix organization	0.000239694	0.0154605	GO:0000725	recombinational repair	1.45124e-05	0.00106126	GO:0051251	positive regulation of lymphocyte activation	3.78519e-05	0.00266504	GO:0048313	Golgi inheritance	0.000222581	0.0157851	GO:0048193	Golgi vesicle transport	0.000174894	0.012513	GO:1905952	regulation of lipid localization
GO:0009101	glycoprotein biosynthetic process	0.000412443	0.0279489					GO:0035296	regulation of tube diameter	0.000305387	0.0201442					GO:0044843	cell cycle G1/S phase transition	0.000708059	0.0460971	GO:2000377	regulation of reactive oxygen species metabolic process	6.11113e-08	4.43257e-06	GO:1990845	adaptive thermogenesis	1.23833e-05	0.00084548	GO:0007519	skeletal muscle tissue development	0.000239848	0.0154605	GO:0032200	telomere organization	1.48845e-05	0.00107596	GO:0033034	positive regulation of myeloid cell apoptotic process	4.01419e-05	0.00279379	GO:0034250	positive regulation of amide metabolic process	0.000237697	0.0164335	GO:0050905	neuromuscular process	0.000177193	0.0125318	GO:0110011	regulation of basement membrane organization
GO:1903522	regulation of blood circulation	0.000414965	0.0279489					GO:0097746	blood vessel diameter maintenance	0.000305387	0.0201442					GO:0006091	generation of precursor metabolites and energy	0.000745	0.0473533	GO:0001818	negative regulation of cytokine production	6.17487e-08	4.43257e-06	GO:0016358	dendrite development	1.31997e-05	0.00089098	GO:0045923	positive regulation of fatty acid metabolic process	0.000246458	0.0157061	GO:0062012	regulation of small molecule metabolic process	1.52887e-05	0.00109262	GO:0018158	protein oxidation	4.17744e-05	0.00285675	GO:0046394	carboxylic acid biosynthetic process	0.00024665	0.0164335	GO:0007030	Golgi organization	0.000189109	0.0132226	GO:0032869	cellular response to insulin stimulus
GO:0014020	primary neural tube formation	0.000435006	0.0284857					GO:0008544	epidermis development	0.000307496	0.0201442					GO:1990403	embryonic brain development	0.000745673	0.0473533	GO:0032930	positive regulation of superoxide anion generation	9.002e-08	6.38939e-06	GO:0032467	positive regulation of cytokinesis	1.35436e-05	0.000903918	GO:0006405	RNA export from nucleus	0.00025228	0.0158901	GO:1901987	regulation of cell cycle phase transition	1.58181e-05	0.00111776	GO:0050731	positive regulation of peptidyl-tyrosine phosphorylation	4.24792e-05	0.00285675	GO:0022411	cellular component disassembly	0.000247158	0.0164335	GO:0046031	ADP metabolic process	0.000195795	0.0132926	GO:0071346	cellular response to type II interferon
GO:0060411	cardiac septum morphogenesis	0.000438042	0.0284857					GO:0016079	synaptic vesicle exocytosis	0.000308015	0.0201442					GO:0002764	immune response-regulating signaling pathway	0.000778458	0.0473533	GO:0002366	leukocyte activation involved in immune response	9.74332e-08	6.83873e-06	GO:0106106	cold-induced thermogenesis	1.42856e-05	0.00094285	GO:0060538	skeletal muscle organ development	0.000255013	0.0158901	GO:0034599	cellular response to oxidative stress	1.60715e-05	0.00112304	GO:0021700	developmental maturation	4.28459e-05	0.00285675	GO:0000302	response to reactive oxygen species	0.000248625	0.0164335	GO:1903305	regulation of regulated secretory pathway	0.00019592	0.0132926	GO:0070997	neuron death
GO:0009991	response to extracellular stimulus	0.000438054	0.0284857					GO:0035150	regulation of tube size	0.000334492	0.0216354					GO:0031577	spindle checkpoint signaling	0.000778493	0.0473533	GO:0022409	positive regulation of cell-cell adhesion	9.88575e-08	6.86245e-06	GO:0030217	T cell differentiation	1.54739e-05	0.00101005	GO:0045787	positive regulation of cell cycle	0.000266574	0.0163822	GO:0000723	telomere maintenance	1.65585e-05	0.00114066	GO:0046777	protein autophosphorylation	4.29338e-05	0.00285675	GO:0048813	dendrite morphogenesis	0.000248625	0.0164335	GO:0048640	negative regulation of developmental growth	0.00019962	0.0132926	GO:0043542	endothelial cell migration
GO:0090630	activation of GTPase activity	0.000451549	0.0284857					GO:0031589	cell-substrate adhesion	0.000342324	0.0219013					GO:0032607	interferon-alpha production	0.000786052	0.0473533	GO:0006909	phagocytosis	1.00578e-07	6.90598e-06	GO:0030522	intracellular receptor signaling pathway	1.57134e-05	0.00101454	GO:0045229	external encapsulating structure organization	0.000269079	0.0163822	GO:0051568	histone H3-K4 methylation	1.68416e-05	0.00114066	GO:0007159	leukocyte cell-cell adhesion	4.62312e-05	0.00304271	GO:1903350	response to dopamine	0.000251764	0.0164335	GO:0035313	wound healing, spreading of epidermal cells	0.000203025	0.0132926	GO:0070371	ERK1 and ERK2 cascade
GO:0030198	extracellular matrix organization	0.000454626	0.0284857					GO:0106027	neuron projection organization	0.000346171	0.0219093					GO:0090140	regulation of mitochondrial fission	0.000786052	0.0473533	GO:0002831	regulation of response to biotic stimulus	1.06072e-07	7.2049e-06	GO:1902307	positive regulation of sodium ion transmembrane transport	1.84955e-05	0.00118132	GO:0022613	ribonucleoprotein complex biogenesis	0.000271674	0.0163822	GO:0140694	non-membrane-bounded organelle assembly	1.68677e-05	0.00114066	GO:0002757	immune response-activating signaling pathway	4.78661e-05	0.00311644	GO:1903351	cellular response to dopamine	0.000251764	0.0164335	GO:2000369	regulation of clathrin-dependent endocytosis	0.000203025	0.0132926	GO:0034205	amyloid-beta formation
GO:0071772	response to BMP	0.000456579	0.0284857					GO:0009260	ribonucleotide biosynthetic process	0.000351221	0.0219363					GO:0007127	meiosis I	0.000791297	0.0473533	GO:1902105	regulation of leukocyte differentiation	1.12355e-07	7.55048e-06	GO:0051250	negative regulation of lymphocyte activation	1.96367e-05	0.00122572	GO:0042326	negative regulation of phosphorylation	0.000292517	0.017261	GO:0003181	atrioventricular valve morphogenesis	1.76164e-05	0.00116959	GO:0046651	lymphocyte proliferation	5.00042e-05	0.00322101	GO:0006635	fatty acid beta-oxidation	0.00025328	0.0164335	GO:0015850	organic hydroxy compound transport	0.000203821	0.0132926	GO:0046686	response to cadmium ion
GO:0071773	cellular response to BMP stimulus	0.000456579	0.0284857					GO:0001936	regulation of endothelial cell proliferation	0.000358612	0.0219363					GO:0051402	neuron apoptotic process	0.000794238	0.0473533	GO:0032928	regulation of superoxide anion generation	1.44523e-07	9.60999e-06	GO:0140694	non-membrane-bounded organelle assembly	2.00842e-05	0.00122572	GO:1905456	regulation of lymphoid progenitor cell differentiation	0.000293431	0.017261	GO:0065004	protein-DNA complex assembly	1.77477e-05	0.00116959	GO:0001659	temperature homeostasis	5.23859e-05	0.00333044	GO:0001667	ameboidal-type cell migration	0.000263797	0.0169358	GO:0045445	myoblast differentiation	0.000209415	0.0132926	GO:0071711	basement membrane organization
GO:0060047	heart contraction	0.000472981	0.0289021					GO:0022604	regulation of cell morphogenesis	0.000360317	0.0219363					GO:0140053	mitochondrial gene expression	0.000813032	0.0474744	GO:0048872	homeostasis of number of cells	1.53443e-07	1.00969e-05	GO:0006914	autophagy	2.01681e-05	0.00122572	GO:1901652	response to peptide	0.000297684	0.017261	GO:1900087	positive regulation of G1/S transition of mitotic cell cycle	1.78535e-05	0.00116959	GO:0002764	immune response-regulating signaling pathway	5.31559e-05	0.00333044	GO:0031396	regulation of protein ubiquitination	0.000273702	0.0170906	GO:0003206	cardiac chamber morphogenesis	0.000210725	0.0132926	GO:0043087	regulation of GTPase activity
GO:0010595	positive regulation of endothelial cell migration	0.000473005	0.0289021					GO:0048675	axon extension	0.000361506	0.0219363					GO:2000045	regulation of G1/S transition of mitotic cell cycle	0.000813032	0.0474744	GO:1903038	negative regulation of leukocyte cell-cell adhesion	1.59542e-07	1.039e-05	GO:0061919	process utilizing autophagic mechanism	2.01681e-05	0.00122572	GO:0006364	rRNA processing	0.000298886	0.017261	GO:0003171	atrioventricular valve development	1.82874e-05	0.00117022	GO:0021924	cell proliferation in external granule layer	5.41743e-05	0.00333044	GO:0071868	cellular response to monoamine stimulus	0.000274616	0.0170906	GO:0050767	regulation of neurogenesis	0.000211687	0.0132926	GO:0001974	blood vessel remodeling
GO:0006664	glycolipid metabolic process	0.000479363	0.0289917					GO:0009914	hormone transport	0.000367077	0.0220471					GO:0031668	cellular response to extracellular stimulus	0.000850276	0.0490782	GO:0050868	negative regulation of T cell activation	1.82094e-07	1.17376e-05	GO:0033044	regulation of chromosome organization	2.02223e-05	0.00122572	GO:0010631	epithelial cell migration	0.000301636	0.017261	GO:0036294	cellular response to decreased oxygen levels	1.83828e-05	0.00117022	GO:0021930	cerebellar granule cell precursor proliferation	5.41743e-05	0.00333044	GO:0071870	cellular response to catecholamine stimulus	0.000274616	0.0170906	GO:2001020	regulation of response to DNA damage stimulus	0.000212749	0.0132926	GO:0048762	mesenchymal cell differentiation
GO:0045599	negative regulation of fat cell differentiation	0.000504923	0.0298399					GO:0030324	lung development	0.000377244	0.0222046					GO:0002757	immune response-activating signaling pathway	0.000857828	0.0490782	GO:1903039	positive regulation of leukocyte cell-cell adhesion	2.57134e-07	1.62904e-05	GO:0019319	hexose biosynthetic process	2.29994e-05	0.00137996	GO:0045930	negative regulation of mitotic cell cycle	0.000307123	0.0173975	GO:0099003	vesicle-mediated transport in synapse	1.84214e-05	0.00117022	GO:0033630	positive regulation of cell adhesion mediated by integrin	5.48611e-05	0.00333044	GO:0072524	pyridine-containing compound metabolic process	0.000286203	0.0175012	GO:0043524	negative regulation of neuron apoptotic process	0.000215941	0.0132926	GO:0072593	reactive oxygen species metabolic process
GO:0043062	extracellular structure organization	0.000515963	0.0298399					GO:0072522	purine-containing compound biosynthetic process	0.000377244	0.0222046									GO:0043254	regulation of protein-containing complex assembly	2.57882e-07	1.62904e-05	GO:0051235	maintenance of location	2.32777e-05	0.00138269	GO:0010759	positive regulation of macrophage chemotaxis	0.000310509	0.0174134	GO:0033673	negative regulation of kinase activity	2.08209e-05	0.0013071	GO:0035025	positive regulation of Rho protein signal transduction	5.50032e-05	0.00333044	GO:1904950	negative regulation of establishment of protein localization	0.000291692	0.0175012	GO:0031396	regulation of protein ubiquitination	0.000216034	0.0132926	GO:0043254	regulation of protein-containing complex assembly
GO:0045229	external encapsulating structure organization	0.000515963	0.0298399					GO:0006887	exocytosis	0.000399404	0.0230949									GO:0032760	positive regulation of tumor necrosis factor production	3.14854e-07	1.96924e-05	GO:0002710	negative regulation of T cell mediated immunity	2.76763e-05	0.00162769	GO:0090132	epithelium migration	0.000337658	0.0187484	GO:1902806	regulation of cell cycle G1/S phase transition	2.09918e-05	0.0013071	GO:0050900	leukocyte migration	5.68637e-05	0.00340901	GO:0014911	positive regulation of smooth muscle cell migration	0.000293601	0.0175012	GO:0097193	intrinsic apoptotic signaling pathway	0.000221282	0.0134434	GO:0060485	mesenchyme development
GO:0048002	antigen processing and presentation of peptide antigen	0.000516123	0.0298399					GO:0046879	hormone secretion	0.000400217	0.0230949									GO:0031589	cell-substrate adhesion	3.2666e-07	2.02305e-05	GO:0031349	positive regulation of defense response	2.82663e-05	0.0016461	GO:0032963	collagen metabolic process	0.000360984	0.0197995	GO:2000112	regulation of cellular macromolecule biosynthetic process	2.3932e-05	0.00145656	GO:0070665	positive regulation of leukocyte proliferation	5.78388e-05	0.00342121	GO:0001778	plasma membrane repair	0.000294466	0.0175012	GO:0048762	mesenchymal cell differentiation	0.000225617	0.0134434	GO:0046785	microtubule polymerization
GO:0150116	regulation of cell-substrate junction organization	0.000518562	0.0298399					GO:0090049	regulation of cell migration involved in sprouting angiogenesis	0.000410492	0.0232181									GO:1902903	regulation of supramolecular fiber organization	3.80269e-07	2.33219e-05	GO:0031346	positive regulation of cell projection organization	2.95159e-05	0.00170218	GO:0030071	regulation of mitotic metaphase/anaphase transition	0.000363649	0.0197995	GO:1902115	regulation of organelle assembly	2.39736e-05	0.00145656	GO:0001959	regulation of cytokine-mediated signaling pathway	5.81973e-05	0.00342121	GO:0034248	regulation of amide metabolic process	0.000298243	0.0175012	GO:0006090	pyruvate metabolic process	0.000226297	0.0134434	GO:1904705	regulation of vascular associated smooth muscle cell proliferation
GO:0001837	epithelial to mesenchymal transition	0.000527567	0.0300662					GO:0060560	developmental growth involved in morphogenesis	0.000412443	0.0232181									GO:0050870	positive regulation of T cell activation	4.02691e-07	2.44596e-05	GO:0070665	positive regulation of leukocyte proliferation	3.05652e-05	0.00174574	GO:0090130	tissue migration	0.000377458	0.0200301	GO:0006417	regulation of translation	2.41146e-05	0.00145656	GO:0003179	heart valve morphogenesis	6.09456e-05	0.00354833	GO:0050708	regulation of protein secretion	0.00029843	0.0175012	GO:0010948	negative regulation of cell cycle process	0.00022752	0.0134434	GO:0046165	alcohol biosynthetic process
GO:0001649	osteoblast differentiation	0.000536428	0.0301522					GO:0051017	actin filament bundle assembly	0.000414186	0.0232181									GO:0002758	innate immune response-activating signaling pathway	4.28265e-07	2.57653e-05	GO:0010803	regulation of tumor necrosis factor-mediated signaling pathway	3.11871e-05	0.00176187	GO:0035296	regulation of tube diameter	0.0003786	0.0200301	GO:0140241	translation at synapse	2.45501e-05	0.00145656	GO:0002768	immune response-regulating cell surface receptor signaling pathway	6.18645e-05	0.00355645	GO:0062014	negative regulation of small molecule metabolic process	0.000301427	0.0175086	GO:1901215	negative regulation of neuron death	0.000229409	0.0134434	GO:0034329	cell junction assembly
GO:0035050	embryonic heart tube development	0.000544338	0.0301522					GO:0006164	purine nucleotide biosynthetic process	0.000432868	0.0236543									GO:0018108	peptidyl-tyrosine phosphorylation	4.50296e-07	2.68351e-05	GO:0010948	negative regulation of cell cycle process	3.16321e-05	0.00176187	GO:0097746	blood vessel diameter maintenance	0.0003786	0.0200301	GO:0140242	translation at postsynapse	2.45501e-05	0.00145656	GO:0044282	small molecule catabolic process	6.22599e-05	0.00355645	GO:0009165	nucleotide biosynthetic process	0.000320683	0.0183316	GO:0009185	ribonucleoside diphosphate metabolic process	0.000238265	0.0138258	GO:0002011	morphogenesis of an epithelial sheet
GO:1903509	liposaccharide metabolic process	0.000544338	0.0301522					GO:0006486	protein glycosylation	0.000435443	0.0236543									GO:0031349	positive regulation of defense response	4.68858e-07	2.76571e-05	GO:0044839	cell cycle G2/M phase transition	3.17374e-05	0.00176187	GO:0048525	negative regulation of viral process	0.000397132	0.0204848	GO:0051402	neuron apoptotic process	2.4843e-05	0.00146017	GO:0035265	organ growth	6.44202e-05	0.00364546	GO:0009100	glycoprotein metabolic process	0.000326052	0.0183316	GO:0009262	deoxyribonucleotide metabolic process	0.00024043	0.0138258	GO:0110020	regulation of actomyosin structure organization
GO:0008380	RNA splicing	0.000551993	0.0302932					GO:0043413	macromolecule glycosylation	0.000435443	0.0236543									GO:0033673	negative regulation of kinase activity	4.72846e-07	2.76571e-05	GO:0006006	glucose metabolic process	3.212e-05	0.0017666	GO:0061081	positive regulation of myeloid leukocyte cytokine production involved in immune response	0.000400723	0.0204848	GO:1903320	regulation of protein modification by small protein conjugation or removal	2.83547e-05	0.00165114	GO:0007179	transforming growth factor beta receptor signaling pathway	6.69223e-05	0.00375198	GO:0051090	regulation of DNA-binding transcription factor activity	0.00032732	0.0183316	GO:1901652	response to peptide	0.00024572	0.0139992	GO:0033157	regulation of intracellular protein transport
GO:0006110	regulation of glycolytic process	0.000562055	0.0305624					GO:0048663	neuron fate commitment	0.000438042	0.0236543									GO:1903557	positive regulation of tumor necrosis factor superfamily cytokine production	4.97828e-07	2.88512e-05	GO:0045017	glycerolipid biosynthetic process	3.29133e-05	0.00179362	GO:0006936	muscle contraction	0.000401722	0.0204848	GO:0043525	positive regulation of neuron apoptotic process	2.87321e-05	0.00165776	GO:0070661	leukocyte proliferation	6.75818e-05	0.0037542	GO:0030336	negative regulation of cell migration	0.000335025	0.0183316	GO:0048469	cell maturation	0.000257617	0.0144912	GO:0043277	apoptotic cell clearance
GO:0060972	left/right pattern formation	0.000603298	0.0323544					GO:0099116	tRNA 5'-end processing	0.000449325	0.0240429									GO:0042060	wound healing	5.41219e-07	3.10807e-05	GO:0042098	T cell proliferation	3.94448e-05	0.00213002	GO:0001503	ossification	0.000401805	0.0204848	GO:0016197	endosomal transport	2.94684e-05	0.00168479	GO:0046885	regulation of hormone biosynthetic process	6.8243e-05	0.00375647	GO:0010001	glial cell differentiation	0.000347908	0.0183316	GO:0043409	negative regulation of MAPK cascade	0.000259448	0.0144912	GO:0006801	superoxide metabolic process
GO:0060070	canonical Wnt signaling pathway	0.000605929	0.0323544					GO:0032965	regulation of collagen biosynthetic process	0.000470645	0.0246369									GO:0090322	regulation of superoxide metabolic process	5.61424e-07	3.19506e-05	GO:0090307	mitotic spindle assembly	4.17542e-05	0.00220779	GO:0043434	response to peptide hormone	0.000414646	0.0209489	GO:0042177	negative regulation of protein catabolic process	2.97888e-05	0.00168777	GO:0002831	regulation of response to biotic stimulus	7.24173e-05	0.00391562	GO:1990778	protein localization to cell periphery	0.000349169	0.0183316	GO:1902806	regulation of cell cycle G1/S phase transition	0.00026142	0.0144912	GO:0070373	negative regulation of ERK1 and ERK2 cascade
GO:0006836	neurotransmitter transport	0.000624728	0.032434					GO:0007179	transforming growth factor beta receptor signaling pathway	0.000472918	0.0246369									GO:0018212	peptidyl-tyrosine modification	5.75037e-07	3.24331e-05	GO:0006094	gluconeogenesis	4.20001e-05	0.00220779	GO:0030509	BMP signaling pathway	0.000442081	0.0221356	GO:0007254	JNK cascade	3.06196e-05	0.00171934	GO:0042063	gliogenesis	7.24277e-05	0.00391562	GO:0098739	import across plasma membrane	0.000354528	0.0183316	GO:0006914	autophagy	0.000268769	0.0146348	GO:0031346	positive regulation of cell projection organization
GO:0007623	circadian rhythm	0.000624728	0.032434					GO:0030323	respiratory tube development	0.000472981	0.0246369									GO:0061082	myeloid leukocyte cytokine production	6.9513e-07	3.88596e-05	GO:0050871	positive regulation of B cell activation	4.20001e-05	0.00220779	GO:0046831	regulation of RNA export from nucleus	0.000455138	0.0221949	GO:0007596	blood coagulation	3.0976e-05	0.00172397	GO:0048738	cardiac muscle tissue development	7.34516e-05	0.00393584	GO:0050878	regulation of body fluid levels	0.000356868	0.0183316	GO:0061919	process utilizing autophagic mechanism	0.000268769	0.0146348	GO:1902993	positive regulation of amyloid precursor protein catabolic process
GO:1903828	negative regulation of protein localization	0.000630705	0.032434					GO:0010712	regulation of collagen metabolic process	0.000504923	0.02607									GO:0016032	viral process	7.24157e-07	4.01272e-05	GO:0001933	negative regulation of protein phosphorylation	5.13561e-05	0.00267592	GO:0097048	dendritic cell apoptotic process	0.000455138	0.0221949	GO:0033299	secretion of lysosomal enzymes	3.19356e-05	0.00176178	GO:0032943	mononuclear cell proliferation	7.72045e-05	0.00407342	GO:0060562	epithelial tube morphogenesis	0.000363772	0.0183316	GO:0010631	epithelial cell migration	0.000276057	0.0148998	GO:0006399	tRNA metabolic process
GO:0010464	regulation of mesenchymal cell proliferation	0.000632184	0.032434					GO:0034446	substrate adhesion-dependent cell spreading	0.000510043	0.0261053									GO:0032102	negative regulation of response to external stimulus	8.01597e-07	4.4032e-05	GO:0050852	T cell receptor signaling pathway	5.27743e-05	0.00272591	GO:2000668	regulation of dendritic cell apoptotic process	0.000455138	0.0221949	GO:1901214	regulation of neuron death	3.29642e-05	0.0017921	GO:0060562	epithelial tube morphogenesis	7.73646e-05	0.00407342	GO:0015980	energy derivation by oxidation of organic compounds	0.000363974	0.0183316	GO:0045446	endothelial cell differentiation	0.000284061	0.0151985	GO:0030336	negative regulation of cell migration
GO:0001838	embryonic epithelial tube formation	0.000635546	0.032434					GO:0061572	actin filament bundle organization	0.00054178	0.0271149									GO:0070665	positive regulation of leukocyte proliferation	8.12341e-07	4.42375e-05	GO:0050854	regulation of antigen receptor-mediated signaling pathway	5.36874e-05	0.00274917	GO:0040013	negative regulation of locomotion	0.000479406	0.0229412	GO:0042060	wound healing	3.33132e-05	0.0017921	GO:0002495	antigen processing and presentation of peptide antigen via MHC class II	7.96779e-05	0.00415466	GO:0060998	regulation of dendritic spine development	0.000374656	0.0183316	GO:0040013	negative regulation of locomotion	0.000288447	0.0153001	GO:0034250	positive regulation of amide metabolic process
GO:0006109	regulation of carbohydrate metabolic process	0.000652762	0.032434					GO:0032963	collagen metabolic process	0.000543021	0.0271149									GO:0050730	regulation of peptidyl-tyrosine phosphorylation	8.33336e-07	4.4993e-05	GO:0050807	regulation of synapse organization	5.46283e-05	0.00277344	GO:0008333	endosome to lysosome transport	0.000481266	0.0229412	GO:0071375	cellular response to peptide hormone stimulus	3.33868e-05	0.0017921	GO:0060759	regulation of response to cytokine stimulus	8.11339e-05	0.00415466	GO:0006814	sodium ion transport	0.000378174	0.0183316	GO:1902175	regulation of oxidative stress-induced intrinsic apoptotic signaling pathway	0.000294694	0.0154979	GO:0001946	lymphangiogenesis
GO:0045732	positive regulation of protein catabolic process	0.000652762	0.032434					GO:0055001	muscle cell development	0.00054363	0.0271149									GO:0043087	regulation of GTPase activity	8.7407e-07	4.67924e-05	GO:0007264	small GTPase mediated signal transduction	5.68132e-05	0.00285992	GO:0007041	lysosomal transport	0.000482714	0.0229412	GO:2001233	regulation of apoptotic signaling pathway	3.36251e-05	0.0017921	GO:0030336	negative regulation of cell migration	8.15267e-05	0.00415466	GO:0016236	macroautophagy	0.000378174	0.0183316	GO:0001946	lymphangiogenesis	0.000302099	0.0157527	GO:2000136	regulation of cell proliferation involved in heart morphogenesis
GO:0048041	focal adhesion assembly	0.000653659	0.032434					GO:0045664	regulation of neuron differentiation	0.000548194	0.0271149									GO:0032946	positive regulation of mononuclear cell proliferation	8.81909e-07	4.68153e-05	GO:1901988	negative regulation of cell cycle phase transition	5.78821e-05	0.00288924	GO:0033044	regulation of chromosome organization	0.000519599	0.0244867	GO:0006644	phospholipid metabolic process	3.51668e-05	0.00185852	GO:0051153	regulation of striated muscle cell differentiation	8.18419e-05	0.00415466	GO:0030048	actin filament-based movement	0.000379171	0.0183316	GO:0009132	nucleoside diphosphate metabolic process	0.000305246	0.015783	GO:0060348	bone development
GO:0007409	axonogenesis	0.00065667	0.032434					GO:0045765	regulation of angiogenesis	0.000568249	0.0278726									GO:0035710	CD4-positive, alpha-beta T cell activation	8.89685e-07	4.68345e-05	GO:0007098	centrosome cycle	5.95274e-05	0.00294661	GO:0018023	peptidyl-lysine trimethylation	0.000528522	0.0246996	GO:1901652	response to peptide	3.68998e-05	0.00193386	GO:0090091	positive regulation of extracellular matrix disassembly	8.23384e-05	0.00415466	GO:0046578	regulation of Ras protein signal transduction	0.000380465	0.0183316	GO:0044843	cell cycle G1/S phase transition	0.000308805	0.015834	GO:0007369	gastrulation
GO:2000573	positive regulation of DNA biosynthetic process	0.000682275	0.0334202					GO:0032964	collagen biosynthetic process	0.000593794	0.0288849									GO:0007007	inner mitochondrial membrane organization	9.17315e-07	4.78899e-05	GO:0016051	carbohydrate biosynthetic process	6.34001e-05	0.00311237	GO:0010801	negative regulation of peptidyl-threonine phosphorylation	0.000560744	0.025723	GO:0060155	platelet dense granule organization	3.78412e-05	0.0019668	GO:0021534	cell proliferation in hindbrain	8.39923e-05	0.00419346	GO:0007015	actin filament organization	0.000381589	0.0183316	GO:0035051	cardiocyte differentiation	0.000317433	0.0160918	GO:0006913	nucleocytoplasmic transport
GO:0045787	positive regulation of cell cycle	0.000709749	0.034481					GO:0048709	oligodendrocyte differentiation	0.000605242	0.0292005									GO:0045577	regulation of B cell differentiation	9.64306e-07	4.99305e-05	GO:0022411	cellular component disassembly	6.51584e-05	0.00317247	GO:1900037	regulation of cellular response to hypoxia	0.000560744	0.025723	GO:0062197	cellular response to chemical stress	3.84652e-05	0.00198111	GO:0042102	positive regulation of T cell proliferation	8.44924e-05	0.00419346	GO:1903035	negative regulation of response to wounding	0.000387577	0.0183316	GO:0090132	epithelium migration	0.000319065	0.0160918	GO:0051169	nuclear transport
GO:0045444	fat cell differentiation	0.000724866	0.0349291					GO:0038179	neurotrophin signaling pathway	0.000632184	0.0302523									GO:1990542	mitochondrial transmembrane transport	9.73447e-07	4.9994e-05	GO:0099175	regulation of postsynapse organization	6.70442e-05	0.00322503	GO:0051090	regulation of DNA-binding transcription factor activity	0.00056418	0.025723	GO:2000300	regulation of synaptic vesicle exocytosis	3.87465e-05	0.00198111	GO:0050764	regulation of phagocytosis	8.5801e-05	0.00420119	GO:0006914	autophagy	0.000389437	0.0183316	GO:0009123	nucleoside monophosphate metabolic process	0.00034452	0.0172344	GO:0002040	sprouting angiogenesis
GO:0072175	epithelial tube formation	0.000733602	0.035065					GO:0035090	maintenance of apical/basal cell polarity	0.000691286	0.0325513									GO:2000379	positive regulation of reactive oxygen species metabolic process	1.14131e-06	5.81424e-05	GO:0070997	neuron death	6.7324e-05	0.00322503	GO:0085029	extracellular matrix assembly	0.000576785	0.0260856	GO:0016050	vesicle organization	4.03686e-05	0.0020474	GO:0018108	peptidyl-tyrosine phosphorylation	8.6036e-05	0.00420119	GO:0061919	process utilizing autophagic mechanism	0.000389437	0.0183316	GO:1905475	regulation of protein localization to membrane	0.000347884	0.0172624	GO:0010563	negative regulation of phosphorus metabolic process
GO:0031076	embryonic camera-type eye development	0.000775473	0.0360086					GO:2001280	positive regulation of unsaturated fatty acid biosynthetic process	0.000691286	0.0325513									GO:0022411	cellular component disassembly	1.19567e-06	6.04246e-05	GO:0030852	regulation of granulocyte differentiation	6.85009e-05	0.00325516	GO:0031102	neuron projection regeneration	0.000615659	0.0276209	GO:2001234	negative regulation of apoptotic signaling pathway	4.08188e-05	0.00205368	GO:0033674	positive regulation of kinase activity	9.0988e-05	0.00440746	GO:0090317	negative regulation of intracellular protein transport	0.000393773	0.0183316	GO:1900180	regulation of protein localization to nucleus	0.000366762	0.0179706	GO:0045936	negative regulation of phosphate metabolic process
GO:0003209	cardiac atrium morphogenesis	0.000776269	0.0360086					GO:0051146	striated muscle cell differentiation	0.000728424	0.0334986									GO:0032680	regulation of tumor necrosis factor production	1.43213e-06	7.17995e-05	GO:0008654	phospholipid biosynthetic process	6.94008e-05	0.00327175	GO:0016072	rRNA metabolic process	0.000627618	0.027934	GO:0097193	intrinsic apoptotic signaling pathway	4.14789e-05	0.00207032	GO:0060326	cell chemotaxis	9.69142e-05	0.00465726	GO:0021954	central nervous system neuron development	0.000394563	0.0183316	GO:0090130	tissue migration	0.000368	0.0179706	GO:0009223	pyrimidine deoxyribonucleotide catabolic process
GO:0061138	morphogenesis of a branching epithelium	0.000781139	0.0360086					GO:0050890	cognition	0.000731562	0.0334986									GO:0045058	T cell selection	1.52588e-06	7.58974e-05	GO:0050671	positive regulation of lymphocyte proliferation	7.0548e-05	0.00329965	GO:0030038	contractile actin filament bundle assembly	0.000653313	0.0286233	GO:0046328	regulation of JNK cascade	4.21734e-05	0.00208841	GO:0018212	peptidyl-tyrosine modification	9.98162e-05	0.00475895	GO:0008361	regulation of cell size	0.00039624	0.0183316	GO:0043433	negative regulation of DNA-binding transcription factor activity	0.000380175	0.0183034	GO:0048845	venous blood vessel morphogenesis
GO:0006826	iron ion transport	0.000789978	0.0360086					GO:0010762	regulation of fibroblast migration	0.000732829	0.0334986									GO:0090257	regulation of muscle system process	1.58541e-06	7.82424e-05	GO:0032411	positive regulation of transporter activity	7.53988e-05	0.00348899	GO:0043149	stress fiber assembly	0.000653313	0.0286233	GO:0009411	response to UV	4.34034e-05	0.00211947	GO:0006091	generation of precursor metabolites and energy	0.000102607	0.00482514	GO:1903649	regulation of cytoplasmic transport	0.000397971	0.0183316	GO:0042391	regulation of membrane potential	0.000380764	0.0183034	GO:0019748	secondary metabolic process
GO:0048016	inositol phosphate-mediated signaling	0.000789978	0.0360086					GO:0002181	cytoplasmic translation	0.00073417	0.0334986									GO:0002833	positive regulation of response to biotic stimulus	1.65795e-06	8.11882e-05	GO:0045577	regulation of B cell differentiation	7.5771e-05	0.00348899	GO:0003179	heart valve morphogenesis	0.000667205	0.0290053	GO:0036465	synaptic vesicle recycling	4.34745e-05	0.00211947	GO:0034976	response to endoplasmic reticulum stress	0.000103555	0.00482514	GO:0006828	manganese ion transport	0.000405143	0.0183316	GO:0032092	positive regulation of protein binding	0.000402003	0.0191746	GO:0019693	ribose phosphate metabolic process
GO:0061035	regulation of cartilage development	0.000805977	0.0360086					GO:0045216	cell-cell junction organization	0.000781139	0.0353676									GO:0032640	tumor necrosis factor production	1.77407e-06	8.62064e-05	GO:0001558	regulation of cell growth	8.04505e-05	0.00366769	GO:0003183	mitral valve morphogenesis	0.000675837	0.0291546	GO:0046890	regulation of lipid biosynthetic process	4.53754e-05	0.00218211	GO:0044264	cellular polysaccharide metabolic process	0.000104392	0.00482514	GO:0015911	long-chain fatty acid import across plasma membrane	0.000405143	0.0183316	GO:0090335	regulation of brown fat cell differentiation	0.000406851	0.0192566	GO:0046578	regulation of Ras protein signal transduction
GO:0014911	positive regulation of smooth muscle cell migration	0.000811499	0.0360086					GO:0048713	regulation of oligodendrocyte differentiation	0.000789978	0.0354141									GO:0051924	regulation of calcium ion transport	1.80428e-06	8.70047e-05	GO:0032414	positive regulation of ion transmembrane transporter activity	8.15703e-05	0.00366769	GO:1903900	regulation of viral life cycle	0.000698439	0.0297015	GO:0006260	DNA replication	4.54534e-05	0.00218211	GO:0120162	positive regulation of cold-induced thermogenesis	0.000104392	0.00482514	GO:0045741	positive regulation of epidermal growth factor-activated receptor activity	0.000405143	0.0183316	GO:0048814	regulation of dendrite morphogenesis	0.000415256	0.0192793	GO:0048732	gland development
GO:0051893	regulation of focal adhesion assembly	0.000811499	0.0360086					GO:0006403	RNA localization	0.000800217	0.0354141									GO:0045619	regulation of lymphocyte differentiation	1.85221e-06	8.86396e-05	GO:0050727	regulation of inflammatory response	8.21217e-05	0.00366769	GO:0007249	I-kappaB kinase/NF-kappaB signaling	0.000699108	0.0297015	GO:0007599	hemostasis	4.62606e-05	0.00218747	GO:0033628	regulation of cell adhesion mediated by integrin	0.000107412	0.00492626	GO:0016055	Wnt signaling pathway	0.000405422	0.0183316	GO:0071375	cellular response to peptide hormone stimulus	0.000416418	0.0192793	GO:0001889	liver development
GO:0090109	regulation of cell-substrate junction assembly	0.000811499	0.0360086					GO:0009266	response to temperature stimulus	0.000800217	0.0354141									GO:0110053	regulation of actin filament organization	2.05972e-06	9.78289e-05	GO:1904062	regulation of monoatomic cation transmembrane transport	8.21217e-05	0.00366769	GO:0031032	actomyosin structure organization	0.000706872	0.0298055	GO:0050817	coagulation	4.62606e-05	0.00218747	GO:0009132	nucleoside diphosphate metabolic process	0.000108207	0.00492626	GO:0031346	positive regulation of cell projection organization	0.000405422	0.0183316	GO:0042770	signal transduction in response to DNA damage	0.00042045	0.0192793	GO:0003231	cardiac ventricle development
GO:0030510	regulation of BMP signaling pathway	0.000814097	0.0360086					GO:0010634	positive regulation of epithelial cell migration	0.000833504	0.036612									GO:1902905	positive regulation of supramolecular fiber organization	2.18351e-06	0.000102934	GO:1901990	regulation of mitotic cell cycle phase transition	8.48255e-05	0.00376018	GO:0071695	anatomical structure maturation	0.000751417	0.0312737	GO:0007160	cell-matrix adhesion	4.78531e-05	0.00224588	GO:0007178	transmembrane receptor protein serine/threonine kinase signaling pathway	0.000110307	0.00496548	GO:1905952	regulation of lipid localization	0.000407713	0.0183316	GO:0045669	positive regulation of osteoblast differentiation	0.000422986	0.0192793	GO:0031032	actomyosin structure organization
GO:0007368	determination of left/right symmetry	0.000823128	0.0360828					GO:0110053	regulation of actin filament organization	0.00087478	0.0381404									GO:0043368	positive T cell selection	2.25281e-06	0.000105415	GO:0071900	regulation of protein serine/threonine kinase activity	9.00622e-05	0.00396274	GO:0071248	cellular response to metal ion	0.000752844	0.0312737	GO:0051353	positive regulation of oxidoreductase activity	5.03331e-05	0.00234478	GO:0060537	muscle tissue development	0.00011074	0.00496548	GO:0016054	organic acid catabolic process	0.000408772	0.0183316	GO:0072527	pyrimidine-containing compound metabolic process	0.000425179	0.0192793	GO:0032388	positive regulation of intracellular transport
GO:0043266	regulation of potassium ion transport	0.00082795	0.0360828					GO:0048839	inner ear development	0.000899002	0.0388171									GO:0002367	cytokine production involved in immune response	2.30291e-06	0.000106232	GO:0032613	interleukin-10 production	9.33287e-05	0.00407627	GO:0045933	positive regulation of muscle contraction	0.000775625	0.0319026	GO:0045444	fat cell differentiation	5.21806e-05	0.00241297	GO:0002429	immune response-activating cell surface receptor signaling pathway	0.000111529	0.00496548	GO:0046395	carboxylic acid catabolic process	0.000408772	0.0183316	GO:0072522	purine-containing compound biosynthetic process	0.000426131	0.0192793	GO:0050769	positive regulation of neurogenesis
GO:0043542	endothelial cell migration	0.000840408	0.0362076					GO:0051302	regulation of cell division	0.000903489	0.0388171									GO:1903555	regulation of tumor necrosis factor superfamily cytokine production	2.30391e-06	0.000106232	GO:0032946	positive regulation of mononuclear cell proliferation	9.74782e-05	0.00419614	GO:0051099	positive regulation of binding	0.00077936	0.0319026	GO:0032768	regulation of monooxygenase activity	5.45749e-05	0.00250527	GO:0050671	positive regulation of lymphocyte proliferation	0.000113698	0.00502513	GO:0051224	negative regulation of protein transport	0.000427514	0.0190322	GO:0060560	developmental growth involved in morphogenesis	0.000448904	0.019951	GO:2000146	negative regulation of cell motility
GO:0033627	cell adhesion mediated by integrin	0.000843032	0.0362076					GO:0002029	desensitization of G protein-coupled receptor signaling pathway	0.000916122	0.0390746									GO:0022408	negative regulation of cell-cell adhesion	2.33074e-06	0.00010649	GO:0002275	myeloid cell activation involved in immune response	9.7808e-05	0.00419614	GO:0000910	cytokinesis	0.000810675	0.0327069	GO:0042176	regulation of protein catabolic process	5.54166e-05	0.00250672	GO:0120161	regulation of cold-induced thermogenesis	0.000118076	0.00518081	GO:0001894	tissue homeostasis	0.000442302	0.0192307	GO:0010632	regulation of epithelial cell migration	0.000451356	0.019951	GO:0035296	regulation of tube diameter
GO:0022613	ribonucleoprotein complex biogenesis	0.000860129	0.0366762					GO:0051496	positive regulation of stress fiber assembly	0.000930108	0.0393857									GO:0007015	actin filament organization	2.34321e-06	0.00010649	GO:0045786	negative regulation of cell cycle	9.83081e-05	0.00419614	GO:0010594	regulation of endothelial cell migration	0.000810675	0.0327069	GO:0014909	smooth muscle cell migration	5.54874e-05	0.00250672	GO:0001782	B cell homeostasis	0.000119363	0.0051996	GO:0060249	anatomical structure homeostasis	0.000442302	0.0192307	GO:0046640	regulation of alpha-beta T cell proliferation	0.000459528	0.019951	GO:0097746	blood vessel diameter maintenance
GO:0021543	pallium development	0.000872028	0.0369179					GO:0048562	embryonic organ morphogenesis	0.000946761	0.0398045									GO:0042692	muscle cell differentiation	2.57407e-06	0.000116146	GO:0050803	regulation of synapse structure or activity	9.88988e-05	0.00419614	GO:1904893	negative regulation of receptor signaling pathway via STAT	0.000830317	0.0331784	GO:0043523	regulation of neuron apoptotic process	5.58023e-05	0.00250672	GO:0006790	sulfur compound metabolic process	0.000124344	0.00537789	GO:1903828	negative regulation of protein localization	0.000442668	0.0192307	GO:2000045	regulation of G1/S transition of mitotic cell cycle	0.000460353	0.019951	GO:1904950	negative regulation of establishment of protein localization
GO:0046700	heterocycle catabolic process	0.000882965	0.0371158					GO:0031032	actomyosin structure organization	0.000959899	0.0400707									GO:0006816	calcium ion transport	2.67997e-06	0.000119682	GO:0043299	leukocyte degranulation	0.000102944	0.0043368	GO:0006914	autophagy	0.000840108	0.0331784	GO:0032970	regulation of actin filament-based process	5.98367e-05	0.00266889	GO:0010675	regulation of cellular carbohydrate metabolic process	0.000127494	0.00547501	GO:1901293	nucleoside phosphate biosynthetic process	0.000444585	0.0192307	GO:0070059	intrinsic apoptotic signaling pathway in response to endoplasmic reticulum stress	0.000462178	0.019951	GO:1903531	negative regulation of secretion by cell
GO:0001933	negative regulation of protein phosphorylation	0.000894515	0.0373366					GO:0010719	negative regulation of epithelial to mesenchymal transition	0.000967966	0.0401229									GO:0002221	pattern recognition receptor signaling pathway	2.69034e-06	0.000119682	GO:0006898	receptor-mediated endocytosis	0.000103999	0.00435039	GO:0061919	process utilizing autophagic mechanism	0.000840108	0.0331784	GO:0009062	fatty acid catabolic process	6.09089e-05	0.00268132	GO:0006029	proteoglycan metabolic process	0.000132901	0.00562368	GO:0009152	purine ribonucleotide biosynthetic process	0.000448675	0.0192709	GO:0007219	Notch signaling pathway	0.000465965	0.019951	GO:0035150	regulation of tube size
GO:0002821	positive regulation of adaptive immune response	0.000910422	0.037522					GO:0061158	3'-UTR-mediated mRNA destabilization	0.000977091	0.0402179									GO:0071706	tumor necrosis factor superfamily cytokine production	2.81194e-06	0.000124217	GO:0032675	regulation of interleukin-6 production	0.000107697	0.00447356	GO:0008286	insulin receptor signaling pathway	0.000863529	0.0338648	GO:0032259	methylation	6.09681e-05	0.00268132	GO:0051098	regulation of binding	0.000133557	0.00562368	GO:0198738	cell-cell signaling by wnt	0.000457152	0.0194591	GO:0002828	regulation of type 2 immune response	0.000466917	0.019951	GO:0006631	fatty acid metabolic process
GO:0006401	RNA catabolic process	0.000917861	0.037522					GO:0050779	RNA destabilization	0.0009948	0.040382									GO:0010810	regulation of cell-substrate adhesion	2.88453e-06	0.000126539	GO:0032611	interleukin-1 beta production	0.000111681	0.00460683	GO:0003170	heart valve development	0.000923021	0.0359466	GO:0000082	G1/S transition of mitotic cell cycle	6.15038e-05	0.00268609	GO:0032350	regulation of hormone metabolic process	0.000133742	0.00562368	GO:0071867	response to monoamine	0.000462628	0.0194591	GO:2000108	positive regulation of leukocyte apoptotic process	0.000466917	0.019951	GO:0044272	sulfur compound biosynthetic process
GO:0042176	regulation of protein catabolic process	0.000917949	0.037522					GO:0061014	positive regulation of mRNA catabolic process	0.0009948	0.040382									GO:0042129	regulation of T cell proliferation	2.92265e-06	0.000126709	GO:0045089	positive regulation of innate immune response	0.000114322	0.00468005	GO:0030323	respiratory tube development	0.000953057	0.0361821	GO:0051588	regulation of neurotransmitter transport	6.34145e-05	0.00275044	GO:0090287	regulation of cellular response to growth factor stimulus	0.000137399	0.00573759	GO:0071869	response to catecholamine	0.000462628	0.0194591	GO:0000082	G1/S transition of mitotic cell cycle	0.000474134	0.0201197	GO:0021697	cerebellar cortex formation
GO:0061351	neural precursor cell proliferation	0.000959899	0.0389679					GO:0043161	proteasome-mediated ubiquitin-dependent protein catabolic process	0.00101702	0.0410011									GO:0002218	activation of innate immune response	2.92852e-06	0.000126709	GO:0006813	potassium ion transport	0.000115032	0.00468005	GO:0046777	protein autophosphorylation	0.000953057	0.0361821	GO:0019216	regulation of lipid metabolic process	6.43139e-05	0.00277035	GO:0010906	regulation of glucose metabolic process	0.000143444	0.00594901	GO:0051648	vesicle localization	0.00046754	0.019531	GO:0006898	receptor-mediated endocytosis	0.000482108	0.0202284	GO:0030220	platelet formation
GO:0051895	negative regulation of focal adhesion assembly	0.000977091	0.0391298					GO:0045055	regulated exocytosis	0.0010331	0.0413488									GO:0062012	regulation of small molecule metabolic process	3.06007e-06	0.0001315	GO:0034765	regulation of monoatomic ion transmembrane transport	0.000118946	0.00477987	GO:0031346	positive regulation of cell projection organization	0.000957058	0.0361821	GO:0051656	establishment of organelle localization	6.47745e-05	0.0027712	GO:0045834	positive regulation of lipid metabolic process	0.00014674	0.00604429	GO:2000146	negative regulation of cell motility	0.000476551	0.019772	GO:0006904	vesicle docking involved in exocytosis	0.000483272	0.0202284	GO:0061323	cell proliferation involved in heart morphogenesis
GO:0150118	negative regulation of cell-substrate junction organization	0.000977091	0.0391298					GO:0071560	cellular response to transforming growth factor beta stimulus	0.00103969	0.0413488									GO:0014066	regulation of phosphatidylinositol 3-kinase signaling	3.11703e-06	0.000133042	GO:0048872	homeostasis of number of cells	0.000119094	0.00477987	GO:0032465	regulation of cytokinesis	0.000959073	0.0361821	GO:0031123	RNA 3'-end processing	6.65909e-05	0.00280071	GO:0032946	positive regulation of mononuclear cell proliferation	0.000157482	0.00639047	GO:0097006	regulation of plasma lipoprotein particle levels	0.000506746	0.0206719	GO:0045598	regulation of fat cell differentiation	0.000493556	0.0205192	GO:1990874	vascular associated smooth muscle cell proliferation
GO:0021537	telencephalon development	0.00101035	0.0401902					GO:0050805	negative regulation of synaptic transmission	0.00106428	0.0420427									GO:0045088	regulation of innate immune response	3.28694e-06	0.000139353	GO:0031023	microtubule organizing center organization	0.000120183	0.0047912	GO:0006465	signal peptide processing	0.000967781	0.0361821	GO:0046330	positive regulation of JNK cascade	6.65909e-05	0.00280071	GO:0002504	antigen processing and presentation of peptide or polysaccharide antigen via MHC class II	0.000157961	0.00639047	GO:0098656	monoatomic anion transmembrane transport	0.000508851	0.0206719	GO:0043161	proteasome-mediated ubiquitin-dependent protein catabolic process	0.000498301	0.0205394	GO:0006066	alcohol metabolic process
GO:0021953	central nervous system neuron differentiation	0.00103456	0.0405898					GO:0070085	glycosylation	0.00111896	0.0439078									GO:0001763	morphogenesis of a branching structure	3.40572e-06	0.000143426	GO:0050868	negative regulation of T cell activation	0.000130302	0.00512924	GO:0042541	hemoglobin biosynthetic process	0.000967781	0.0361821	GO:0032770	positive regulation of monooxygenase activity	6.68003e-05	0.00280071	GO:0072593	reactive oxygen species metabolic process	0.000158721	0.00639047	GO:0044272	sulfur compound biosynthetic process	0.000510554	0.0206719	GO:0030308	negative regulation of cell growth	0.000500717	0.0205394	GO:0032386	regulation of intracellular transport
GO:0001558	regulation of cell growth	0.00104258	0.0405898					GO:0044331	cell-cell adhesion mediated by cadherin	0.00114239	0.0443719									GO:0031334	positive regulation of protein-containing complex assembly	3.49259e-06	0.00014611	GO:0002831	regulation of response to biotic stimulus	0.00013039	0.00512924	GO:0046782	regulation of viral transcription	0.000981427	0.0363154	GO:0050680	negative regulation of epithelial cell proliferation	6.75454e-05	0.0028132	GO:0043542	endothelial cell migration	0.000159366	0.00639047	GO:0042063	gliogenesis	0.000511846	0.0206719	GO:0021915	neural tube development	0.000506707	0.0206475	GO:0070372	regulation of ERK1 and ERK2 cascade
GO:1990928	response to amino acid starvation	0.00104541	0.0405898					GO:0090092	regulation of transmembrane receptor protein serine/threonine kinase signaling pathway	0.0011496	0.0443719									GO:0050671	positive regulation of lymphocyte proliferation	3.55804e-06	0.000147869	GO:0002699	positive regulation of immune effector process	0.000131507	0.00513917	GO:0034470	ncRNA processing	0.000984296	0.0363154	GO:0003183	mitral valve morphogenesis	6.83119e-05	0.0028143	GO:0106106	cold-induced thermogenesis	0.000165007	0.00652485	GO:0071900	regulation of protein serine/threonine kinase activity	0.000515292	0.0206719	GO:0050922	negative regulation of chemotaxis	0.000514489	0.0208266	GO:0033674	positive regulation of kinase activity
GO:0051962	positive regulation of nervous system development	0.00104779	0.0405898					GO:0014855	striated muscle cell proliferation	0.0011534	0.0443719									GO:0006801	superoxide metabolic process	3.64835e-06	0.000150631	GO:1904951	positive regulation of establishment of protein localization	0.000134489	0.00522132	GO:0043161	proteasome-mediated ubiquitin-dependent protein catabolic process	0.000996613	0.0364601	GO:0000027	ribosomal large subunit assembly	6.84669e-05	0.0028143	GO:0001894	tissue homeostasis	0.00016595	0.00652485	GO:0006821	chloride transport	0.000518577	0.0206719	GO:0090092	regulation of transmembrane receptor protein serine/threonine kinase signaling pathway	0.000520396	0.0209281	GO:0001960	negative regulation of cytokine-mediated signaling pathway
GO:0043470	regulation of carbohydrate catabolic process	0.00109254	0.0420488					GO:0022401	negative adaptation of signaling pathway	0.00116923	0.0446888									GO:0045089	positive regulation of innate immune response	4.09097e-06	0.000167809	GO:0046634	regulation of alpha-beta T cell activation	0.000135727	0.0052352	GO:0010810	regulation of cell-substrate adhesion	0.00100122	0.0364601	GO:0009101	glycoprotein biosynthetic process	7.0851e-05	0.00289339	GO:0060249	anatomical structure homeostasis	0.00016595	0.00652485	GO:0048754	branching morphogenesis of an epithelial tube	0.000529203	0.0209585	GO:0043393	regulation of protein binding	0.000527363	0.0209988	GO:0001837	epithelial to mesenchymal transition
GO:0061626	pharyngeal arch artery morphogenesis	0.00111316	0.0421363					GO:0007416	synapse assembly	0.00119917	0.045492									GO:0050871	positive regulation of B cell activation	4.18429e-06	0.00017053	GO:0045056	transcytosis	0.000144642	0.00554307	GO:0014009	glial cell proliferation	0.00101866	0.0365094	GO:0008654	phospholipid biosynthetic process	7.20154e-05	0.00290945	GO:0003170	heart valve development	0.000170529	0.00665001	GO:0043405	regulation of MAP kinase activity	0.000541683	0.0213143	GO:2000116	regulation of cysteine-type endopeptidase activity	0.000530536	0.0209988	GO:0043523	regulation of neuron apoptotic process
GO:0086013	membrane repolarization during cardiac muscle cell action potential	0.00111316	0.0421363					GO:0060537	muscle tissue development	0.00121245	0.045492									GO:0072538	T-helper 17 type immune response	4.45406e-06	0.000180361	GO:0042129	regulation of T cell proliferation	0.000146255	0.00556893	GO:1990845	adaptive thermogenesis	0.00102248	0.0365094	GO:0043414	macromolecule methylation	7.21696e-05	0.00290945	GO:0035924	cellular response to vascular endothelial growth factor stimulus	0.00017133	0.00665001	GO:0009914	hormone transport	0.00055367	0.0216464	GO:0016311	dephosphorylation	0.000532393	0.0209988	GO:0061008	hepaticobiliary system development
GO:0014812	muscle cell migration	0.00112383	0.0421363					GO:0030512	negative regulation of transforming growth factor beta receptor signaling pathway	0.00121343	0.045492									GO:0016311	dephosphorylation	4.98449e-06	0.000200554	GO:0007265	Ras protein signal transduction	0.000148051	0.00560142	GO:0003171	atrioventricular valve development	0.00103184	0.0365094	GO:0140236	translation at presynapse	7.35279e-05	0.00294533	GO:0043535	regulation of blood vessel endothelial cell migration	0.000177744	0.00685503	GO:0006103	2-oxoglutarate metabolic process	0.000567177	0.0217221	GO:0031348	negative regulation of defense response	0.000538706	0.0211125	GO:0035924	cellular response to vascular endothelial growth factor stimulus
GO:0048863	stem cell differentiation	0.00112953	0.0421363					GO:0061387	regulation of extent of cell growth	0.00123962	0.0461798									GO:0042100	B cell proliferation	5.18924e-06	0.000207471	GO:0032651	regulation of interleukin-1 beta production	0.000152556	0.00569179	GO:0072698	protein localization to microtubule cytoskeleton	0.00103606	0.0365094	GO:0006302	double-strand break repair	7.51805e-05	0.00299247	GO:0050730	regulation of peptidyl-tyrosine phosphorylation	0.000182461	0.00699242	GO:1902001	fatty acid transmembrane transport	0.000567177	0.0217221	GO:0009260	ribonucleotide biosynthetic process	0.000547173	0.0213086	GO:1904356	regulation of telomere maintenance via telomere lengthening
GO:0002456	T cell mediated immunity	0.00113036	0.0421363					GO:0050772	positive regulation of axonogenesis	0.00124816	0.0462054									GO:0006469	negative regulation of protein kinase activity	5.22284e-06	0.000207501	GO:0002703	regulation of leukocyte mediated immunity	0.000152709	0.00569179	GO:0006406	mRNA export from nucleus	0.00105005	0.0365094	GO:0018107	peptidyl-threonine phosphorylation	7.81278e-05	0.00309022	GO:0002833	positive regulation of response to biotic stimulus	0.000190102	0.00717488	GO:0006164	purine nucleotide biosynthetic process	0.000569164	0.0217221	GO:0043547	positive regulation of GTPase activity	0.000556811	0.0214511	GO:1902905	positive regulation of supramolecular fiber organization
GO:0007369	gastrulation	0.00115257	0.0424302					GO:0050953	sensory perception of light stimulus	0.00128278	0.0471903									GO:1900076	regulation of cellular response to insulin stimulus	5.32073e-06	0.000210069	GO:0022408	negative regulation of cell-cell adhesion	0.000153314	0.00569179	GO:0001818	negative regulation of cytokine production	0.0010536	0.0365094	GO:0072329	monocarboxylic acid catabolic process	8.09812e-05	0.00318307	GO:0010950	positive regulation of endopeptidase activity	0.00019075	0.00717488	GO:0048732	gland development	0.000571361	0.0217221	GO:0055001	muscle cell development	0.0005603	0.0214511	GO:0043434	response to peptide hormone
GO:0035148	tube formation	0.00115257	0.0424302					GO:2001233	regulation of apoptotic signaling pathway	0.00129531	0.0473551									GO:0090199	regulation of release of cytochrome c from mitochondria	5.49621e-06	0.000215649	GO:0051170	import into nucleus	0.000156366	0.00576904	GO:0071772	response to BMP	0.00105466	0.0365094	GO:0035304	regulation of protein dephosphorylation	8.4386e-05	0.00329629	GO:0002697	regulation of immune effector process	0.000190777	0.00717488	GO:0009895	negative regulation of catabolic process	0.000577122	0.0217221	GO:0010718	positive regulation of epithelial to mesenchymal transition	0.000562679	0.0214511	GO:0055008	cardiac muscle tissue morphogenesis
GO:0048596	embryonic camera-type eye morphogenesis	0.00116923	0.0427779					GO:0016055	Wnt signaling pathway	0.00132053	0.047702									GO:0019722	calcium-mediated signaling	5.89405e-06	0.000229831	GO:0032612	interleukin-1 production	0.000159463	0.00581218	GO:0071773	cellular response to BMP stimulus	0.00105466	0.0365094	GO:0051341	regulation of oxidoreductase activity	8.71208e-05	0.00338211	GO:0006022	aminoglycan metabolic process	0.000209096	0.00778076	GO:0022617	extracellular matrix disassembly	0.00058766	0.0217221	GO:0009259	ribonucleotide metabolic process	0.000564779	0.0214511	GO:0043524	negative regulation of neuron apoptotic process
GO:0043543	protein acylation	0.00118162	0.0429662					GO:0099175	regulation of postsynapse organization	0.00132909	0.047702									GO:0060537	muscle tissue development	6.04474e-06	0.000234261	GO:0030890	positive regulation of B cell proliferation	0.000161371	0.00581218	GO:0010717	regulation of epithelial to mesenchymal transition	0.00108412	0.0372992	GO:0006650	glycerophospholipid metabolic process	8.77919e-05	0.00338726	GO:0006026	aminoglycan catabolic process	0.000210327	0.00778076	GO:0033866	nucleoside bisphosphate biosynthetic process	0.00058766	0.0217221	GO:0001933	negative regulation of protein phosphorylation	0.000579729	0.0218839	GO:1903706	regulation of hemopoiesis
GO:0033157	regulation of intracellular protein transport	0.00120201	0.0432716					GO:0036303	lymph vessel morphogenesis	0.00133609	0.047702									GO:0060562	epithelial tube morphogenesis	6.36853e-06	0.000245305	GO:0046635	positive regulation of alpha-beta T cell activation	0.000161449	0.00581218	GO:0051962	positive regulation of nervous system development	0.0011062	0.0378267	GO:0050999	regulation of nitric-oxide synthase activity	8.88243e-05	0.00340619	GO:2000146	negative regulation of cell motility	0.000210742	0.00778076	GO:0034030	ribonucleoside bisphosphate biosynthetic process	0.00058766	0.0217221	GO:0046390	ribose phosphate biosynthetic process	0.000586343	0.0219986	GO:0030198	extracellular matrix organization
GO:0001894	tissue homeostasis	0.00122531	0.0432716					GO:0051098	regulation of binding	0.00134928	0.047702									GO:0030225	macrophage differentiation	6.42054e-06	0.00024581	GO:1904029	regulation of cyclin-dependent protein kinase activity	0.000161449	0.00581218	GO:0042060	wound healing	0.00111863	0.0380197	GO:0035264	multicellular organism growth	9.06156e-05	0.00345383	GO:0007266	Rho protein signal transduction	0.000223406	0.00818473	GO:0034033	purine nucleoside bisphosphate biosynthetic process	0.00058766	0.0217221	GO:0009394	2'-deoxyribonucleotide metabolic process	0.000600738	0.0222671	GO:0042063	gliogenesis
GO:0051091	positive regulation of DNA-binding transcription factor activity	0.00122531	0.0432716					GO:0006029	proteoglycan metabolic process	0.00136401	0.047702									GO:0046632	alpha-beta T cell differentiation	6.53374e-06	0.000248636	GO:0050672	negative regulation of lymphocyte proliferation	0.000181971	0.00651151	GO:0016485	protein processing	0.00112668	0.0380629	GO:0009259	ribonucleotide metabolic process	9.35229e-05	0.00353435	GO:0018209	peptidyl-serine modification	0.000225157	0.00818473	GO:0032387	negative regulation of intracellular transport	0.000602408	0.022133	GO:0019692	deoxyribose phosphate metabolic process	0.000600738	0.0222671	GO:1905954	positive regulation of lipid localization
GO:0060249	anatomical structure homeostasis	0.00122531	0.0432716					GO:0042490	mechanoreceptor differentiation	0.00136401	0.047702									GO:0046626	regulation of insulin receptor signaling pathway	6.75396e-06	0.000255478	GO:0032760	positive regulation of tumor necrosis factor production	0.000186119	0.00662004	GO:0021700	developmental maturation	0.00115904	0.0389214	GO:0061709	reticulophagy	9.38523e-05	0.00353435	GO:0007029	endoplasmic reticulum organization	0.000227091	0.00818473	GO:0099515	actin filament-based transport	0.000614924	0.0224413	GO:0072331	signal transduction by p53 class mediator	0.000617129	0.022508	GO:0008286	insulin receptor signaling pathway
GO:0050678	regulation of epithelial cell proliferation	0.00123199	0.0432716					GO:0071559	response to transforming growth factor beta	0.00136483	0.047702									GO:0051222	positive regulation of protein transport	7.81185e-06	0.000293438	GO:0030225	macrophage differentiation	0.00018898	0.00668179	GO:0008217	regulation of blood pressure	0.00118879	0.0396449	GO:0006469	negative regulation of protein kinase activity	9.62809e-05	0.00360423	GO:0033627	cell adhesion mediated by integrin	0.000227091	0.00818473	GO:0072593	reactive oxygen species metabolic process	0.000620202	0.0224413	GO:0009151	purine deoxyribonucleotide metabolic process	0.00061783	0.022508	GO:0090322	regulation of superoxide metabolic process
GO:1900180	regulation of protein localization to nucleus	0.00123383	0.0432716					GO:0015931	nucleobase-containing compound transport	0.00136963	0.047702									GO:0002449	lymphocyte mediated immunity	7.87494e-06	0.000293438	GO:0050764	regulation of phagocytosis	0.000194825	0.00684769	GO:0007093	mitotic cell cycle checkpoint signaling	0.00119472	0.0396449	GO:0044242	cellular lipid catabolic process	9.88919e-05	0.00368007	GO:0014074	response to purine-containing compound	0.000239228	0.00852073	GO:2000377	regulation of reactive oxygen species metabolic process	0.000621837	0.0224413	GO:0007431	salivary gland development	0.000619939	0.022508	GO:0044557	relaxation of smooth muscle
GO:0014910	regulation of smooth muscle cell migration	0.00124816	0.0433355					GO:0032535	regulation of cellular component size	0.00140465	0.0486341									GO:0045061	thymic T cell selection	7.89686e-06	0.000293438	GO:0002367	cytokine production involved in immune response	0.000203785	0.00712047	GO:0072594	establishment of protein localization to organelle	0.0012382	0.0408462	GO:0035303	regulation of dephosphorylation	0.000102078	0.00377627	GO:0048661	positive regulation of smooth muscle cell proliferation	0.000239228	0.00852073	GO:0006520	amino acid metabolic process	0.000658439	0.0235419	GO:0006979	response to oxidative stress	0.000621869	0.022508	GO:0050679	positive regulation of epithelial cell proliferation
GO:0006644	phospholipid metabolic process	0.00125131	0.0433355					GO:0198738	cell-cell signaling by wnt	0.00145255	0.0489321									GO:0031647	regulation of protein stability	8.02084e-06	0.000296302	GO:0032945	negative regulation of mononuclear cell proliferation	0.0002084	0.0072365	GO:0030511	positive regulation of transforming growth factor beta receptor signaling pathway	0.00126987	0.0411247	GO:0007064	mitotic sister chromatid cohesion	0.000105757	0.0038669	GO:0003012	muscle system process	0.000249327	0.00868325	GO:0009150	purine ribonucleotide metabolic process	0.00066324	0.0235419	GO:0003012	muscle system process	0.000631087	0.0226688	GO:0032204	regulation of telomere maintenance
GO:0002062	chondrocyte differentiation	0.00125759	0.0433355					GO:0014904	myotube cell development	0.00146047	0.0489321									GO:0019058	viral life cycle	8.22961e-06	0.000301833	GO:0002833	positive regulation of response to biotic stimulus	0.000209542	0.0072365	GO:1903846	positive regulation of cellular response to transforming growth factor beta stimulus	0.00126987	0.0411247	GO:0010839	negative regulation of keratinocyte proliferation	0.000105757	0.0038669	GO:0002066	columnar/cuboidal epithelial cell development	0.000249527	0.00868325	GO:0034329	cell junction assembly	0.000663913	0.0235419	GO:0019693	ribose phosphate metabolic process	0.000633679	0.0226688	GO:0035089	establishment of apical/basal cell polarity
GO:0006091	generation of precursor metabolites and energy	0.00126723	0.0434153					GO:0033866	nucleoside bisphosphate biosynthetic process	0.00146619	0.0489321									GO:0006084	acetyl-CoA metabolic process	8.26613e-06	0.000301833	GO:0032652	regulation of interleukin-1 production	0.000219029	0.00752042	GO:1905523	positive regulation of macrophage migration	0.00126987	0.0411247	GO:0032438	melanosome organization	0.000106999	0.00388968	GO:0042446	hormone biosynthetic process	0.000249527	0.00868325	GO:0007254	JNK cascade	0.000668645	0.0235726	GO:0048608	reproductive structure development	0.000668785	0.0235222	GO:0006939	smooth muscle contraction
GO:0007160	cell-matrix adhesion	0.00128566	0.0437938					GO:0034030	ribonucleoside bisphosphate biosynthetic process	0.00146619	0.0489321									GO:0050732	negative regulation of peptidyl-tyrosine phosphorylation	8.68464e-06	0.000315293	GO:0046822	regulation of nucleocytoplasmic transport	0.00022422	0.00765442	GO:0050767	regulation of neurogenesis	0.00127598	0.0411247	GO:0009416	response to light stimulus	0.000110944	0.00400992	GO:1903053	regulation of extracellular matrix organization	0.000249527	0.00868325	GO:0003018	vascular process in circulatory system	0.000674206	0.0236321	GO:1901987	regulation of cell cycle phase transition	0.000668878	0.0235222	GO:0043062	extracellular structure organization
GO:1901796	regulation of signal transduction by p53 class mediator	0.00130669	0.0442556					GO:0034033	purine nucleoside bisphosphate biosynthetic process	0.00146619	0.0489321									GO:0006790	sulfur compound metabolic process	9.36786e-06	0.000338153	GO:0006111	regulation of gluconeogenesis	0.000227465	0.00772082	GO:2001234	negative regulation of apoptotic signaling pathway	0.00128354	0.0411319	GO:0000956	nuclear-transcribed mRNA catabolic process	0.000114317	0.00410824	GO:0048705	skeletal system morphogenesis	0.000253704	0.00877815	GO:1902414	protein localization to cell junction	0.00068758	0.0239632	GO:0030968	endoplasmic reticulum unfolded protein response	0.00067237	0.0235222	GO:0045229	external encapsulating structure organization
GO:0003283	atrial septum development	0.00133609	0.0449942					GO:0051235	maintenance of location	0.0014726	0.0489321									GO:0009615	response to virus	9.6249e-06	0.000343506	GO:0006470	protein dephosphorylation	0.000231346	0.00780794	GO:0090101	negative regulation of transmembrane receptor protein serine/threonine kinase signaling pathway	0.00129263	0.0411879	GO:0019693	ribose phosphate metabolic process	0.000128948	0.00460771	GO:1900120	regulation of receptor binding	0.000263299	0.00902972	GO:2001233	regulation of apoptotic signaling pathway	0.000727968	0.0251142	GO:0060419	heart growth	0.000672829	0.0235222	GO:0046390	ribose phosphate biosynthetic process
GO:0043038	amino acid activation	0.00137296	0.0457729					GO:0042634	regulation of hair cycle	0.00147507	0.0489321									GO:0051235	maintenance of location	9.6249e-06	0.000343506	GO:0006606	protein import into nucleus	0.000234653	0.0078748	GO:0030490	maturation of SSU-rRNA	0.00130424	0.0413229	GO:0003174	mitral valve development	0.000130857	0.00464949	GO:1901298	regulation of hydrogen peroxide-mediated programmed cell death	0.000265945	0.00902972	GO:1903320	regulation of protein modification by small protein conjugation or removal	0.000728842	0.0251142	GO:0007265	Ras protein signal transduction	0.000681971	0.023669	GO:0000209	protein polyubiquitination
GO:0061307	cardiac neural crest cell differentiation involved in heart development	0.00137465	0.0457729					GO:0002066	columnar/cuboidal epithelial cell development	0.00147977	0.0489321									GO:0046634	regulation of alpha-beta T cell activation	9.85686e-06	0.000349808	GO:1903557	positive regulation of tumor necrosis factor superfamily cytokine production	0.000237559	0.00792753	GO:0045185	maintenance of protein location	0.00132111	0.0413899	GO:1902903	regulation of supramolecular fiber organization	0.000131623	0.00465045	GO:0032885	regulation of polysaccharide biosynthetic process	0.00026694	0.00902972	GO:1903426	regulation of reactive oxygen species biosynthetic process	0.000742528	0.025442	GO:0035272	exocrine system development	0.00068472	0.023669	GO:0003012	muscle system process
GO:0016331	morphogenesis of embryonic epithelium	0.00145895	0.0478242																	GO:0010935	regulation of macrophage cytokine production	1.01442e-05	0.000356005	GO:0019693	ribose phosphate metabolic process	0.000239557	0.00794955	GO:2000117	negative regulation of cysteine-type endopeptidase activity	0.00132111	0.0413899	GO:0018210	peptidyl-threonine modification	0.000133621	0.00469463	GO:0035850	epithelial cell differentiation involved in kidney development	0.00026694	0.00902972	GO:0050770	regulation of axonogenesis	0.000754609	0.0257064	GO:0060537	muscle tissue development	0.000700111	0.0240658	GO:0043217	myelin maintenance
GO:0006687	glycosphingolipid metabolic process	0.00146047	0.0478242																	GO:0042554	superoxide anion generation	1.01442e-05	0.000356005	GO:0007033	vacuole organization	0.000247492	0.00816723	GO:0032239	regulation of nucleobase-containing compound transport	0.00134394	0.0416879	GO:0006338	chromatin remodeling	0.000141132	0.00493098	GO:0070167	regulation of biomineral tissue development	0.00027246	0.00916525	GO:0042554	superoxide anion generation	0.000760439	0.0257064	GO:0051146	striated muscle cell differentiation	0.00072855	0.0249043	GO:0006909	phagocytosis
GO:0060412	ventricular septum morphogenesis	0.00146047	0.0478242																	GO:0043281	regulation of cysteine-type endopeptidase activity involved in apoptotic process	1.04416e-05	0.000362906	GO:0043161	proteasome-mediated ubiquitin-dependent protein catabolic process	0.000252746	0.00827546	GO:0051647	nucleus localization	0.00135109	0.0416879	GO:0048753	pigment granule organization	0.000146438	0.00506016	GO:0032102	negative regulation of response to external stimulus	0.000277958	0.00929854	GO:0045833	negative regulation of lipid metabolic process	0.000762888	0.0257064	GO:0061138	morphogenesis of a branching epithelium	0.000736007	0.0250202	GO:0006417	regulation of translation
GO:0006446	regulation of translational initiation	0.00147977	0.04819																	GO:1903706	regulation of hemopoiesis	1.04557e-05	0.000362906	GO:0000079	regulation of cyclin-dependent protein serine/threonine kinase activity	0.000253558	0.00827546	GO:0010632	regulation of epithelial cell migration	0.00136036	0.0416879	GO:1905168	positive regulation of double-strand break repair via homologous recombination	0.000146438	0.00506016	GO:0030099	myeloid cell differentiation	0.000285322	0.00949245	GO:0016570	histone modification	0.000772762	0.025896	GO:0046620	regulation of organ growth	0.000755394	0.0255381	GO:0045860	positive regulation of protein kinase activity
GO:0010563	negative regulation of phosphorus metabolic process	0.0015228	0.0490525																	GO:0030888	regulation of B cell proliferation	1.06059e-05	0.000366106	GO:0032635	interleukin-6 production	0.000257467	0.00835712	GO:0048762	mesenchymal cell differentiation	0.00136036	0.0416879	GO:0045787	positive regulation of cell cycle	0.000148582	0.00510618	GO:0032881	regulation of polysaccharide metabolic process	0.00029266	0.00968338	GO:0035384	thioester biosynthetic process	0.000797553	0.026152	GO:0043583	ear development	0.000784815	0.0263878	GO:0043409	negative regulation of MAPK cascade
GO:0045936	negative regulation of phosphate metabolic process	0.0015228	0.0490525																	GO:0002819	regulation of adaptive immune response	1.06855e-05	0.000366848	GO:0007249	I-kappaB kinase/NF-kappaB signaling	0.000266561	0.00854792	GO:0090068	positive regulation of cell cycle process	0.00143319	0.0436812	GO:0009260	ribonucleotide biosynthetic process	0.000153218	0.00523689	GO:0019221	cytokine-mediated signaling pathway	0.0002948	0.00970115	GO:0046823	negative regulation of nucleocytoplasmic transport	0.000797553	0.026152	GO:0071902	positive regulation of protein serine/threonine kinase activity	0.000789557	0.026403	GO:0051897	positive regulation of protein kinase B signaling
GO:0014909	smooth muscle cell migration	0.00155436	0.0497984																	GO:0042063	gliogenesis	1.08999e-05	0.000372187	GO:0045930	negative regulation of mitotic cell cycle	0.000266561	0.00854792	GO:0090630	activation of GTPase activity	0.00145495	0.0441048	GO:0050678	regulation of epithelial cell proliferation	0.000156284	0.00529988	GO:0071695	anatomical structure maturation	0.000307716	0.0100296	GO:0071616	acyl-CoA biosynthetic process	0.000797553	0.026152	GO:0043502	regulation of muscle adaptation	0.000809877	0.0269361	GO:0014812	muscle cell migration
																				GO:1904951	positive regulation of establishment of protein localization	1.10084e-05	0.000373873	GO:0043266	regulation of potassium ion transport	0.000267662	0.00854792	GO:0016570	histone modification	0.00147015	0.044137	GO:0040029	epigenetic regulation of gene expression	0.000156746	0.00529988	GO:0071674	mononuclear cell migration	0.000308232	0.0100296	GO:0097062	dendritic spine maintenance	0.000797553	0.026152	GO:0061448	connective tissue development	0.000821819	0.026998	GO:0061041	regulation of wound healing
																				GO:0001776	leukocyte homeostasis	1.11156e-05	0.000375493	GO:0000086	G2/M transition of mitotic cell cycle	0.000279325	0.00885294	GO:0003330	regulation of extracellular matrix constituent secretion	0.00149537	0.044137	GO:0006310	DNA recombination	0.000158531	0.00533156	GO:0016525	negative regulation of angiogenesis	0.000309749	0.0100296	GO:1901890	positive regulation of cell junction assembly	0.000804899	0.0262517	GO:0001837	epithelial to mesenchymal transition	0.000827156	0.026998	GO:0051168	nuclear export
																				GO:0001667	ameboidal-type cell migration	1.1314e-05	0.000380161	GO:0007162	negative regulation of cell adhesion	0.000281692	0.00885294	GO:0022027	interkinetic nuclear migration	0.00149537	0.044137	GO:0031331	positive regulation of cellular catabolic process	0.000162357	0.00543119	GO:0040013	negative regulation of locomotion	0.000320485	0.0102674	GO:0030177	positive regulation of Wnt signaling pathway	0.000819137	0.026574	GO:0007588	excretion	0.000828298	0.026998	GO:1902105	regulation of leukocyte differentiation
																				GO:0002639	positive regulation of immunoglobulin production	1.16439e-05	0.000389177	GO:0051100	negative regulation of binding	0.000282224	0.00885294	GO:1903054	negative regulation of extracellular matrix organization	0.00149537	0.044137	GO:0003018	vascular process in circulatory system	0.000164294	0.00546689	GO:0050890	cognition	0.000320485	0.0102674	GO:0016331	morphogenesis of embryonic epithelium	0.000828293	0.0267037	GO:0006941	striated muscle contraction	0.000829291	0.026998	GO:0034109	homotypic cell-cell adhesion
																				GO:0002285	lymphocyte activation involved in immune response	1.21152e-05	0.000401655	GO:0043405	regulation of MAP kinase activity	0.000283175	0.00885294	GO:1903297	regulation of hypoxia-induced intrinsic apoptotic signaling pathway	0.00149537	0.044137	GO:0045834	positive regulation of lipid metabolic process	0.000165518	0.00547388	GO:0048762	mesenchymal cell differentiation	0.000332106	0.0105837	GO:0050730	regulation of peptidyl-tyrosine phosphorylation	0.000837299	0.0267037	GO:0036303	lymph vessel morphogenesis	0.000853938	0.0276541	GO:0061138	morphogenesis of a branching epithelium
																				GO:0061138	morphogenesis of a branching epithelium	1.21444e-05	0.000401655	GO:0097581	lamellipodium organization	0.000284688	0.00885364	GO:0031668	cellular response to extracellular stimulus	0.00151521	0.0444883	GO:0000303	response to superoxide	0.000166244	0.00547388	GO:0009743	response to carbohydrate	0.0003439	0.0109022	GO:0072594	establishment of protein localization to organelle	0.000840135	0.0267037	GO:0051962	positive regulation of nervous system development	0.000869362	0.0279532	GO:0006520	amino acid metabolic process
																				GO:0062013	positive regulation of small molecule metabolic process	1.24429e-05	0.000409383	GO:0014066	regulation of phosphatidylinositol 3-kinase signaling	0.000288982	0.00894037	GO:0050886	endocrine process	0.00154667	0.0447706	GO:2001022	positive regulation of response to DNA damage stimulus	0.000169287	0.00552252	GO:0046939	nucleotide phosphorylation	0.000346035	0.0109127	GO:0050994	regulation of lipid catabolic process	0.000840648	0.0267037	GO:0061458	reproductive system development	0.000872259	0.0279532	GO:0006936	muscle contraction
																				GO:0050678	regulation of epithelial cell proliferation	1.30577e-05	0.000427385	GO:0050869	negative regulation of B cell activation	0.000299514	0.00921819	GO:0030204	chondroitin sulfate metabolic process	0.00154877	0.0447706	GO:0046474	glycerophospholipid biosynthetic process	0.000170356	0.00552252	GO:0032755	positive regulation of interleukin-6 production	0.000351417	0.0109372	GO:0042308	negative regulation of protein import into nucleus	0.0008524	0.0269367	GO:0042491	inner ear auditory receptor cell differentiation	0.000883633	0.028035	GO:0001936	regulation of endothelial cell proliferation
																				GO:0006644	phospholipid metabolic process	1.34188e-05	0.000436942	GO:0045787	positive regulation of cell cycle	0.000302056	0.00924851	GO:0048011	neurotrophin TRK receptor signaling pathway	0.00154877	0.0447706	GO:2000045	regulation of G1/S transition of mitotic cell cycle	0.000170356	0.00552252	GO:0006814	sodium ion transport	0.000352088	0.0109372	GO:0000209	protein polyubiquitination	0.000859655	0.027026	GO:0001667	ameboidal-type cell migration	0.000883925	0.028035	GO:0006790	sulfur compound metabolic process
																				GO:0010632	regulation of epithelial cell migration	1.35877e-05	0.000440171	GO:0051898	negative regulation of protein kinase B signaling	0.00030568	0.00931148	GO:0071456	cellular response to hypoxia	0.00168971	0.0485944	GO:0009150	purine ribonucleotide metabolic process	0.000171938	0.00554522	GO:0007611	learning or memory	0.000352883	0.0109372	GO:0046879	hormone secretion	0.000906532	0.0283535	GO:0050769	positive regulation of neurogenesis	0.000898944	0.0283651	GO:0000723	telomere maintenance
																				GO:0046635	positive regulation of alpha-beta T cell activation	1.37543e-05	0.000443295	GO:0120162	positive regulation of cold-induced thermogenesis	0.000308806	0.00935871	GO:0030324	lung development	0.00171719	0.0491327	GO:0034968	histone lysine methylation	0.000175849	0.00564241	GO:0045765	regulation of angiogenesis	0.000354037	0.0109372	GO:0090596	sensory organ morphogenesis	0.000932896	0.0289791	GO:2000134	negative regulation of G1/S transition of mitotic cell cycle	0.000911836	0.0286252	GO:0090316	positive regulation of intracellular protein transport
																				GO:0033674	positive regulation of kinase activity	1.42662e-05	0.00045746	GO:0046631	alpha-beta T cell activation	0.00032369	0.00971069	GO:0021575	hindbrain morphogenesis	0.00177163	0.0499262	GO:0061912	selective autophagy	0.000179122	0.00571827	GO:0010594	regulation of endothelial cell migration	0.000364658	0.0111512	GO:0010976	positive regulation of neuron projection development	0.000936035	0.0289791	GO:0001763	morphogenesis of a branching structure	0.000947351	0.0295891	GO:0003208	cardiac ventricle morphogenesis
																				GO:0044272	sulfur compound biosynthetic process	1.5427e-05	0.000490022	GO:0048813	dendrite morphogenesis	0.00032369	0.00971069	GO:0030199	collagen fibril organization	0.00177163	0.0499262	GO:0016358	dendrite development	0.0001819	0.00577763	GO:0050851	antigen receptor-mediated signaling pathway	0.000364658	0.0111512	GO:0048489	synaptic vesicle transport	0.000941071	0.0289878	GO:0032259	methylation	0.000956082	0.029711	GO:0001935	endothelial cell proliferation
																				GO:0050777	negative regulation of immune response	1.54368e-05	0.000490022	GO:1904427	positive regulation of calcium ion transmembrane transport	0.000326412	0.00974314	GO:0044380	protein localization to cytoskeleton	0.00177163	0.0499262	GO:0043484	regulation of RNA splicing	0.000186677	0.00587417	GO:0032970	regulation of actin filament-based process	0.000366488	0.0111512	GO:0003014	renal system process	0.000962655	0.0295037	GO:0001649	osteoblast differentiation	0.000965833	0.0298632	GO:0051402	neuron apoptotic process
																				GO:0032609	type II interferon production	1.56428e-05	0.000494079	GO:0032984	protein-containing complex disassembly	0.000336309	0.00998836					GO:0046889	positive regulation of lipid biosynthetic process	0.000186808	0.00587417	GO:0006516	glycoprotein catabolic process	0.000387565	0.0117335	GO:0050731	positive regulation of peptidyl-tyrosine phosphorylation	0.000994784	0.0303359	GO:0010639	negative regulation of organelle organization	0.000981725	0.0302028	GO:0070507	regulation of microtubule cytoskeleton organization
																				GO:0002718	regulation of cytokine production involved in immune response	1.57691e-05	0.000495588	GO:0010906	regulation of glucose metabolic process	0.000338019	0.00998921					GO:0001763	morphogenesis of a branching structure	0.000194601	0.0060614	GO:2000181	negative regulation of blood vessel morphogenesis	0.000397888	0.0119465	GO:0050773	regulation of dendrite development	0.00101493	0.0305011	GO:0006816	calcium ion transport	0.0009926	0.0303477	GO:0060761	negative regulation of response to cytokine stimulus
																				GO:0050854	regulation of antigen receptor-mediated signaling pathway	1.64932e-05	0.000515779	GO:0051222	positive regulation of protein transport	0.000350474	0.010306					GO:0071453	cellular response to oxygen levels	0.00019469	0.0060614	GO:0009620	response to fungus	0.000398547	0.0119465	GO:0032386	regulation of intracellular transport	0.0010152	0.0305011	GO:0010823	negative regulation of mitochondrion organization	0.000996299	0.0303477	GO:0002042	cell migration involved in sprouting angiogenesis
																				GO:0007264	small GTPase mediated signal transduction	1.70619e-05	0.000530936	GO:0010804	negative regulation of tumor necrosis factor-mediated signaling pathway	0.000363897	0.0105863					GO:0006413	translational initiation	0.000196169	0.00607738	GO:0046365	monosaccharide catabolic process	0.000419181	0.0124564	GO:0046883	regulation of hormone secretion	0.0010152	0.0305011	GO:0061687	detoxification of inorganic compound	0.00101978	0.0309098	GO:0010883	regulation of lipid storage
																				GO:0016482	cytosolic transport	1.75012e-05	0.000541936	GO:0030889	negative regulation of B cell proliferation	0.000363897	0.0105863					GO:0001885	endothelial cell development	0.000198802	0.00612875	GO:0051147	regulation of muscle cell differentiation	0.000419942	0.0124564	GO:0032535	regulation of cellular component size	0.00102224	0.0305619	GO:0032088	negative regulation of NF-kappaB transcription factor activity	0.00104628	0.0315576	GO:0036344	platelet morphogenesis
																				GO:0003012	muscle system process	1.94159e-05	0.000596532	GO:0046486	glycerolipid metabolic process	0.000365353	0.0105863					GO:0046390	ribose phosphate biosynthetic process	0.000208054	0.0063827	GO:1990874	vascular associated smooth muscle cell proliferation	0.000428152	0.0124564	GO:0043543	protein acylation	0.00107719	0.0320476	GO:0016570	histone modification	0.00105503	0.0316663	GO:0034614	cellular response to reactive oxygen species
																				GO:0006099	tricarboxylic acid cycle	1.94532e-05	0.000596532	GO:0033674	positive regulation of kinase activity	0.00037277	0.0107488					GO:0033157	regulation of intracellular protein transport	0.000224386	0.00685031	GO:1901570	fatty acid derivative biosynthetic process	0.000429714	0.0124564	GO:0072522	purine-containing compound biosynthetic process	0.00109787	0.0324405	GO:0070972	protein localization to endoplasmic reticulum	0.00106696	0.0318691	GO:0072329	monocarboxylic acid catabolic process
																				GO:0043367	CD4-positive, alpha-beta T cell differentiation	1.97805e-05	0.000603639	GO:0030851	granulocyte differentiation	0.000375508	0.0107754					GO:0000380	alternative mRNA splicing, via spliceosome	0.00022863	0.0069305	GO:1903522	regulation of blood circulation	0.000430099	0.0124564	GO:0018107	peptidyl-threonine phosphorylation	0.00110103	0.0324405	GO:0051101	regulation of DNA binding	0.00108334	0.0320488	GO:0006403	RNA localization
																				GO:0007416	synapse assembly	2.01628e-05	0.000612347	GO:0030853	negative regulation of granulocyte differentiation	0.000381746	0.0109018					GO:0016079	synaptic vesicle exocytosis	0.000229217	0.0069305	GO:0018105	peptidyl-serine phosphorylation	0.000430961	0.0124564	GO:0050667	homocysteine metabolic process	0.00111408	0.0325108	GO:0016050	vesicle organization	0.0010834	0.0320488	GO:0032984	protein-containing complex disassembly
																				GO:1903900	regulation of viral life cycle	2.27362e-05	0.000679197	GO:0090068	positive regulation of cell cycle process	0.000392721	0.0111615					GO:0060445	branching involved in salivary gland morphogenesis	0.000233522	0.00702689	GO:0006924	activation-induced cell death of T cells	0.000434072	0.0124564	GO:0098883	synapse pruning	0.00111408	0.0325108	GO:1903321	negative regulation of protein modification by small protein conjugation or removal	0.0011019	0.0324401	GO:0062197	cellular response to chemical stress
																				GO:0010934	macrophage cytokine production	2.28106e-05	0.000679197	GO:0046578	regulation of Ras protein signal transduction	0.000397151	0.0112275					GO:0015849	organic acid transport	0.000238714	0.00713383	GO:0021936	regulation of cerebellar granule cell precursor proliferation	0.000434072	0.0124564	GO:0045765	regulation of angiogenesis	0.00112038	0.0325391	GO:0045667	regulation of osteoblast differentiation	0.00111008	0.0325252	GO:0007044	cell-substrate junction assembly
																				GO:0006914	autophagy	2.28573e-05	0.000679197	GO:0002704	negative regulation of leukocyte mediated immunity	0.000398823	0.0112275					GO:0007435	salivary gland morphogenesis	0.000240479	0.00713383	GO:0050667	homocysteine metabolic process	0.000434072	0.0124564	GO:0007009	plasma membrane organization	0.00113008	0.0326653	GO:0007264	small GTPase mediated signal transduction	0.00111603	0.0325448	GO:0001763	morphogenesis of a branching structure
																				GO:0061919	process utilizing autophagic mechanism	2.28573e-05	0.000679197	GO:1902850	microtubule cytoskeleton organization involved in mitosis	0.000411086	0.0115182					GO:1903421	regulation of synaptic vesicle recycling	0.000240479	0.00713383	GO:0034284	response to monosaccharide	0.000446635	0.0127216	GO:0009062	fatty acid catabolic process	0.00113837	0.0327497	GO:0001666	response to hypoxia	0.00113323	0.0328903	GO:0009259	ribonucleotide metabolic process
																				GO:0007229	integrin-mediated signaling pathway	2.29015e-05	0.000679197	GO:0002285	lymphocyte activation involved in immune response	0.000414095	0.011548					GO:0014812	muscle cell migration	0.000243332	0.00718457	GO:0007162	negative regulation of cell adhesion	0.000448325	0.0127216	GO:0099518	vesicle cytoskeletal trafficking	0.00115458	0.0328314	GO:0060420	regulation of heart growth	0.00115723	0.032966	GO:0048048	embryonic eye morphogenesis
																				GO:1903715	regulation of aerobic respiration	2.61177e-05	0.000770959	GO:0006816	calcium ion transport	0.00044385	0.0123183					GO:0046928	regulation of neurotransmitter secretion	0.000245009	0.00720029	GO:1901343	negative regulation of vasculature development	0.000449615	0.0127216	GO:0001941	postsynaptic membrane organization	0.00115602	0.0328314	GO:0007350	blastoderm segmentation	0.00115726	0.032966	GO:0031670	cellular response to nutrient
																				GO:0090201	negative regulation of release of cytochrome c from mitochondria	2.82276e-05	0.000829366	GO:0060998	regulation of dendritic spine development	0.000445865	0.0123183					GO:0060996	dendritic spine development	0.000247908	0.00725159	GO:0046683	response to organophosphorus	0.000455104	0.012817	GO:0048013	ephrin receptor signaling pathway	0.0011584	0.0328314	GO:0048791	calcium ion-regulated exocytosis of neurotransmitter	0.00115726	0.032966	GO:0045932	negative regulation of muscle contraction
																				GO:0042102	positive regulation of T cell proliferation	2.89609e-05	0.000846973	GO:0002573	myeloid leukocyte differentiation	0.000449752	0.0123682					GO:0015711	organic anion transport	0.000249337	0.00725963	GO:2000377	regulation of reactive oxygen species metabolic process	0.000463049	0.0129677	GO:0044282	small molecule catabolic process	0.00116432	0.0328314	GO:2000561	regulation of CD4-positive, alpha-beta T cell proliferation	0.00115726	0.032966	GO:0034599	cellular response to oxidative stress
																				GO:0072350	tricarboxylic acid metabolic process	2.95744e-05	0.000858517	GO:0042306	regulation of protein import into nucleus	0.000460927	0.0126171					GO:0009314	response to radiation	0.000252886	0.00732903	GO:1901342	regulation of vasculature development	0.000465785	0.0129677	GO:2001243	negative regulation of intrinsic apoptotic signaling pathway	0.00116813	0.0328314	GO:0051090	regulation of DNA-binding transcription factor activity	0.00117357	0.0330545	GO:0010876	lipid localization
																				GO:0045926	negative regulation of growth	2.96275e-05	0.000858517	GO:0032743	positive regulation of interleukin-2 production	0.000469669	0.012739					GO:0000305	response to oxygen radical	0.000254254	0.00733489	GO:0052548	regulation of endopeptidase activity	0.000466878	0.0129677	GO:1903428	positive regulation of reactive oxygen species biosynthetic process	0.00119035	0.0328512	GO:0051153	regulation of striated muscle cell differentiation	0.00117604	0.0330545	GO:0045198	establishment of epithelial cell apical/basal polarity
																				GO:0046638	positive regulation of alpha-beta T cell differentiation	3.0636e-05	0.000883689	GO:0043267	negative regulation of potassium ion transport	0.000469669	0.012739					GO:0071450	cellular response to oxygen radical	0.000258532	0.00739049	GO:0001958	endochondral ossification	0.000472887	0.0130151	GO:0006637	acyl-CoA metabolic process	0.00119441	0.0328512	GO:0050919	negative chemotaxis	0.00119881	0.0330545	GO:0006665	sphingolipid metabolic process
																				GO:0002703	regulation of leukocyte mediated immunity	3.21311e-05	0.0009226	GO:0046474	glycerophospholipid biosynthetic process	0.00047999	0.0129597					GO:0071451	cellular response to superoxide	0.000258532	0.00739049	GO:0036075	replacement ossification	0.000472887	0.0130151	GO:0035383	thioester metabolic process	0.00119441	0.0328512	GO:2000516	positive regulation of CD4-positive, alpha-beta T cell activation	0.00119881	0.0330545	GO:0045637	regulation of myeloid cell differentiation
																				GO:0060759	regulation of response to cytokine stimulus	3.30501e-05	0.000940127	GO:0051056	regulation of small GTPase mediated signal transduction	0.000487532	0.0131038					GO:1902275	regulation of chromatin organization	0.00027705	0.00788402	GO:0034341	response to type II interferon	0.000476219	0.0130475	GO:0045727	positive regulation of translation	0.00119504	0.0328512	GO:0030307	positive regulation of cell growth	0.00120255	0.0330545	GO:0032535	regulation of cellular component size
																				GO:0051348	negative regulation of transferase activity	3.30861e-05	0.000940127	GO:0006839	mitochondrial transport	0.000497095	0.0133006					GO:0043506	regulation of JUN kinase activity	0.000298859	0.00845423	GO:0009135	purine nucleoside diphosphate metabolic process	0.000507086	0.0137072	GO:0060070	canonical Wnt signaling pathway	0.00120002	0.0328512	GO:0043491	protein kinase B signaling	0.00120255	0.0330545	GO:1903320	regulation of protein modification by small protein conjugation or removal
																				GO:0050852	T cell receptor signaling pathway	3.33807e-05	0.000940127	GO:0000910	cytokinesis	0.000503432	0.0134098					GO:0070482	response to oxygen levels	0.000299776	0.00845423	GO:0009179	purine ribonucleoside diphosphate metabolic process	0.000507086	0.0137072	GO:0072330	monocarboxylic acid biosynthetic process	0.00120529	0.0328512	GO:0009636	response to toxic substance	0.00120325	0.0330545	GO:0031396	regulation of protein ubiquitination
																				GO:0045017	glycerolipid biosynthetic process	3.34824e-05	0.000940127	GO:0070664	negative regulation of leukocyte proliferation	0.000506334	0.0134269					GO:0060491	regulation of cell projection assembly	0.000306022	0.00859183	GO:0061326	renal tubule development	0.000507086	0.0137072	GO:0009259	ribonucleotide metabolic process	0.00120654	0.0328512	GO:0014855	striated muscle cell proliferation	0.00120335	0.0330545	GO:0006940	regulation of smooth muscle contraction
																				GO:1903169	regulation of calcium ion transmembrane transport	3.34856e-05	0.000940127	GO:0018027	peptidyl-lysine dimethylation	0.000511595	0.0135061					GO:0018022	peptidyl-lysine methylation	0.000310466	0.00867787	GO:0050866	negative regulation of cell activation	0.000517084	0.0139153	GO:0006417	regulation of translation	0.00122038	0.0328743	GO:0090257	regulation of muscle system process	0.00122734	0.0330981	GO:0050435	amyloid-beta metabolic process
																				GO:0032868	response to insulin	3.38415e-05	0.000945915	GO:0032409	regulation of transporter activity	0.000514341	0.0135185					GO:1903311	regulation of mRNA metabolic process	0.00031538	0.00874053	GO:0050832	defense response to fungus	0.000524842	0.0140616	GO:0018108	peptidyl-tyrosine phosphorylation	0.00122138	0.0328743	GO:0030336	negative regulation of cell migration	0.00123028	0.0330981	GO:0032964	collagen biosynthetic process
																				GO:0061097	regulation of protein tyrosine kinase activity	3.50955e-05	0.000976644	GO:0002762	negative regulation of myeloid leukocyte differentiation	0.000536262	0.0140326					GO:0007179	transforming growth factor beta receptor signaling pathway	0.000315488	0.00874053	GO:0043467	regulation of generation of precursor metabolites and energy	0.000546779	0.0145848	GO:0019395	fatty acid oxidation	0.00123923	0.0328743	GO:2000514	regulation of CD4-positive, alpha-beta T cell activation	0.00123588	0.0330981	GO:0051962	positive regulation of nervous system development
																				GO:0042391	regulation of membrane potential	3.69089e-05	0.0010226	GO:0006109	regulation of carbohydrate metabolic process	0.000549882	0.0142894					GO:0009152	purine ribonucleotide biosynthetic process	0.000324677	0.00895567	GO:0051017	actin filament bundle assembly	0.000570895	0.0151032	GO:0030038	contractile actin filament bundle assembly	0.00123923	0.0328743	GO:0042551	neuron maturation	0.00123721	0.0330981	GO:0030258	lipid modification
																				GO:0010631	epithelial cell migration	3.7941e-05	0.00104067	GO:0070588	calcium ion transmembrane transport	0.000553502	0.0142894					GO:0006352	DNA-templated transcription initiation	0.000327299	0.008964	GO:0030167	proteoglycan catabolic process	0.000571202	0.0151032	GO:0043149	stress fiber assembly	0.00123923	0.0328743	GO:0050775	positive regulation of dendrite morphogenesis	0.00123721	0.0330981	GO:0046777	protein autophosphorylation
																				GO:0045860	positive regulation of protein kinase activity	3.80001e-05	0.00104067	GO:0006644	phospholipid metabolic process	0.000553584	0.0142894					GO:1990144	intrinsic apoptotic signaling pathway in response to hypoxia	0.00032783	0.008964	GO:0062013	positive regulation of small molecule metabolic process	0.000576716	0.0151499	GO:1902774	late endosome to lysosome transport	0.00123973	0.0328743	GO:1903078	positive regulation of protein localization to plasma membrane	0.00123721	0.0330981	GO:0031929	TOR signaling
																				GO:0030308	negative regulation of cell growth	3.8055e-05	0.00104067	GO:1901976	regulation of cell cycle checkpoint	0.000555698	0.0142894					GO:0010639	negative regulation of organelle organization	0.000334595	0.00910939	GO:0009749	response to glucose	0.000577971	0.0151499	GO:0001763	morphogenesis of a branching structure	0.00126957	0.0334799	GO:0006882	intracellular zinc ion homeostasis	0.00125705	0.0334833	GO:0060562	epithelial tube morphogenesis
																				GO:0043467	regulation of generation of precursor metabolites and energy	3.83907e-05	0.00104532	GO:0045926	negative regulation of growth	0.000558671	0.0143039					GO:0072659	protein localization to plasma membrane	0.000343953	0.0092889	GO:0072080	nephron tubule development	0.00058438	0.0152518	GO:0070391	response to lipoteichoic acid	0.00128452	0.0334799	GO:0006349	regulation of gene expression by genomic imprinting	0.00130338	0.0344193	GO:0018108	peptidyl-tyrosine phosphorylation
																				GO:0051258	protein polymerization	3.89777e-05	0.00105675	GO:0032543	mitochondrial translation	0.000585643	0.0149301					GO:0046942	carboxylic acid transport	0.000346574	0.0092889	GO:0045860	positive regulation of protein kinase activity	0.000595161	0.0154004	GO:0071223	cellular response to lipoteichoic acid	0.00128452	0.0334799	GO:0060340	positive regulation of type I interferon-mediated signaling pathway	0.00130338	0.0344193	GO:0050919	negative chemotaxis
																				GO:0042176	regulation of protein catabolic process	3.96633e-05	0.00107074	GO:0046390	ribose phosphate biosynthetic process	0.000603018	0.0153074					GO:0000184	nuclear-transcribed mRNA catabolic process, nonsense-mediated decay	0.000348384	0.0092889	GO:0050727	regulation of inflammatory response	0.000595161	0.0154004	GO:0150172	regulation of phosphatidylcholine metabolic process	0.00128452	0.0334799	GO:0033044	regulation of chromosome organization	0.00132931	0.0345561	GO:0098751	bone cell development
																				GO:0006085	acetyl-CoA biosynthetic process	4.0587e-05	0.00109068	GO:0051057	positive regulation of small GTPase mediated signal transduction	0.000610227	0.0154245					GO:0046365	monosaccharide catabolic process	0.000348384	0.0092889	GO:0030595	leukocyte chemotaxis	0.000605539	0.0156023	GO:0070997	neuron death	0.0012963	0.0334899	GO:0045927	positive regulation of growth	0.00133234	0.0345561	GO:0043405	regulation of MAP kinase activity
																				GO:0014706	striated muscle tissue development	4.07473e-05	0.00109068	GO:0000075	cell cycle checkpoint signaling	0.000618395	0.0155209					GO:0001823	mesonephros development	0.000349977	0.0092889	GO:0072010	glomerular epithelium development	0.000615871	0.0156029	GO:0043254	regulation of protein-containing complex assembly	0.00130039	0.0334899	GO:0014888	striated muscle adaptation	0.00133655	0.0345561	GO:1903037	regulation of leukocyte cell-cell adhesion
																				GO:0001558	regulation of cell growth	4.19423e-05	0.00111677	GO:1903038	negative regulation of leukocyte cell-cell adhesion	0.00061927	0.0155209					GO:0033059	cellular pigmentation	0.000350051	0.0092889	GO:0072087	renal vesicle development	0.000615871	0.0156029	GO:0009260	ribonucleotide biosynthetic process	0.00130996	0.0334899	GO:0040029	epigenetic regulation of gene expression	0.00134143	0.0345561	GO:0051222	positive regulation of protein transport
																				GO:0043161	proteasome-mediated ubiquitin-dependent protein catabolic process	4.21988e-05	0.00111677	GO:1901214	regulation of neuron death	0.000636925	0.0158964					GO:0046486	glycerolipid metabolic process	0.000354105	0.00935701	GO:0090030	regulation of steroid hormone biosynthetic process	0.000615871	0.0156029	GO:1904951	positive regulation of establishment of protein localization	0.00131992	0.0334899	GO:1901361	organic cyclic compound catabolic process	0.0013421	0.0345561	GO:0002064	epithelial cell development
																				GO:0008654	phospholipid biosynthetic process	4.25322e-05	0.00111677	GO:0002700	regulation of production of molecular mediator of immune response	0.00064403	0.0160064					GO:0034644	cellular response to UV	0.000358109	0.00942322	GO:1904424	regulation of GTP binding	0.000615871	0.0156029	GO:0032965	regulation of collagen biosynthetic process	0.00132058	0.0334899	GO:0010634	positive regulation of epithelial cell migration	0.00134226	0.0345561	GO:0009131	pyrimidine nucleoside monophosphate catabolic process
																				GO:0032869	cellular response to insulin stimulus	4.25322e-05	0.00111677	GO:0009144	purine nucleoside triphosphate metabolic process	0.000647688	0.0160224					GO:0051650	establishment of vesicle localization	0.000372992	0.00970592	GO:0043491	protein kinase B signaling	0.000623352	0.0157266	GO:0090630	activation of GTPase activity	0.00132579	0.0334899	GO:0048639	positive regulation of developmental growth	0.00137048	0.0351357	GO:0009178	pyrimidine deoxyribonucleoside monophosphate catabolic process
																				GO:0051146	striated muscle cell differentiation	4.26059e-05	0.00111677	GO:0045088	regulation of innate immune response	0.000650066	0.0160224					GO:1905039	carboxylic acid transmembrane transport	0.0003756	0.00970592	GO:1901568	fatty acid derivative metabolic process	0.000638196	0.0160343	GO:0018210	peptidyl-threonine modification	0.00132883	0.0334899	GO:0055017	cardiac muscle tissue growth	0.00138519	0.0353655	GO:0021684	cerebellar granular layer formation
																				GO:0048754	branching morphogenesis of an epithelial tube	4.30575e-05	0.00111901	GO:0032412	regulation of monoatomic ion transmembrane transporter activity	0.00066352	0.0162195					GO:0046034	ATP metabolic process	0.000375953	0.00970592	GO:0010934	macrophage cytokine production	0.000643998	0.0160803	GO:0034440	lipid oxidation	0.00132883	0.0334899	GO:0046633	alpha-beta T cell proliferation	0.00141839	0.0360633	GO:0021707	cerebellar granule cell differentiation
																				GO:1901214	regulation of neuron death	4.31886e-05	0.00111901	GO:0043124	negative regulation of I-kappaB kinase/NF-kappaB signaling	0.000669845	0.0162195					GO:0006661	phosphatidylinositol biosynthetic process	0.000377762	0.00970592	GO:0050729	positive regulation of inflammatory response	0.000645335	0.0160803	GO:0045862	positive regulation of proteolysis	0.00135292	0.0338842	GO:0051222	positive regulation of protein transport	0.00144959	0.0364805	GO:0033299	secretion of lysosomal enzymes
																				GO:0008154	actin polymerization or depolymerization	4.32228e-05	0.00111901	GO:0050856	regulation of T cell receptor signaling pathway	0.000669845	0.0162195					GO:0014910	regulation of smooth muscle cell migration	0.000377762	0.00970592	GO:0051091	positive regulation of DNA-binding transcription factor activity	0.000660659	0.0163946	GO:0006913	nucleocytoplasmic transport	0.00136115	0.0338842	GO:0050873	brown fat cell differentiation	0.00145422	0.0364805	GO:0060312	regulation of blood vessel remodeling
																				GO:0055074	calcium ion homeostasis	4.49616e-05	0.00115597	GO:0010959	regulation of metal ion transport	0.000670912	0.0162195					GO:0065005	protein-lipid complex assembly	0.000378113	0.00970592	GO:0032956	regulation of actin cytoskeleton organization	0.000663608	0.0164006	GO:0051169	nuclear transport	0.00136115	0.0338842	GO:0048259	regulation of receptor-mediated endocytosis	0.00145957	0.0364805	GO:0061687	detoxification of inorganic compound
																				GO:0032479	regulation of type I interferon production	4.51075e-05	0.00115597	GO:0050731	positive regulation of peptidyl-tyrosine phosphorylation	0.000671715	0.0162195					GO:0044772	mitotic cell cycle phase transition	0.00038718	0.00989828	GO:0072028	nephron morphogenesis	0.000671818	0.01641	GO:0046777	protein autophosphorylation	0.00138656	0.0339861	GO:0072001	renal system development	0.00146062	0.0364805	GO:0050890	cognition
																				GO:0001836	release of cytochrome c from mitochondria	4.51992e-05	0.00115597	GO:0048015	phosphatidylinositol-mediated signaling	0.00068574	0.0164911					GO:0001822	kidney development	0.000389438	0.0099157	GO:0010172	embryonic body morphogenesis	0.000674831	0.01641	GO:0051403	stress-activated MAPK cascade	0.00138656	0.0339861	GO:0006890	retrograde vesicle-mediated transport, Golgi to endoplasmic reticulum	0.00146982	0.0364805	GO:0061162	establishment of monopolar cell polarity
																				GO:0090132	epithelium migration	4.60649e-05	0.00117335	GO:0002698	negative regulation of immune effector process	0.00070119	0.0167909					GO:0090313	regulation of protein targeting to membrane	0.000395709	0.0100347	GO:0010421	hydrogen peroxide-mediated programmed cell death	0.000674831	0.01641	GO:0050995	negative regulation of lipid catabolic process	0.00138802	0.0339861	GO:0009150	purine ribonucleotide metabolic process	0.00147037	0.0364805	GO:0090257	regulation of muscle system process
																				GO:0010038	response to metal ion	4.66538e-05	0.00118358	GO:0002819	regulation of adaptive immune response	0.00070386	0.0167909					GO:0042770	signal transduction in response to DNA damage	0.000401163	0.0101322	GO:0032026	response to magnesium ion	0.000674831	0.01641	GO:0060004	reflex	0.00138802	0.0339861	GO:0090101	negative regulation of transmembrane receptor protein serine/threonine kinase signaling pathway	0.00148512	0.0366986	GO:0000302	response to reactive oxygen species
																				GO:0002888	positive regulation of myeloid leukocyte mediated immunity	4.76405e-05	0.00119423	GO:0030032	lamellipodium assembly	0.000725171	0.0171506					GO:0072331	signal transduction by p53 class mediator	0.000415795	0.0104597	GO:0045926	negative regulation of growth	0.000682949	0.0164811	GO:0018212	peptidyl-tyrosine modification	0.0013931	0.0339861	GO:0042759	long-chain fatty acid biosynthetic process	0.00154063	0.037918	GO:1904358	positive regulation of telomere maintenance via telomere lengthening
																				GO:0035384	thioester biosynthetic process	4.76405e-05	0.00119423	GO:0046579	positive regulation of Ras protein signal transduction	0.000725171	0.0171506					GO:0051006	positive regulation of lipoprotein lipase activity	0.000419257	0.0104631	GO:0009185	ribonucleoside diphosphate metabolic process	0.000689745	0.0164811	GO:0051222	positive regulation of protein transport	0.00140275	0.0340852	GO:0016079	synaptic vesicle exocytosis	0.00155038	0.038006	GO:0006672	ceramide metabolic process
																				GO:0071616	acyl-CoA biosynthetic process	4.76405e-05	0.00119423	GO:0043255	regulation of carbohydrate biosynthetic process	0.0007276	0.0171506					GO:1990264	peptidyl-tyrosine dephosphorylation involved in inactivation of protein kinase activity	0.000419257	0.0104631	GO:0032652	regulation of interleukin-1 production	0.000689745	0.0164811	GO:0009060	aerobic respiration	0.00141728	0.0343015	GO:0006520	amino acid metabolic process	0.00155992	0.0380881	GO:0008347	glial cell migration
																				GO:0014812	muscle cell migration	4.80926e-05	0.00120079	GO:0032653	regulation of interleukin-10 production	0.000733966	0.0172322					GO:0042180	cellular ketone metabolic process	0.000421501	0.0104775	GO:0032835	glomerulus development	0.000691362	0.0164811	GO:0015711	organic anion transport	0.0014539	0.0350489	GO:0046329	negative regulation of JNK cascade	0.0015716	0.0382215	GO:0046889	positive regulation of lipid biosynthetic process
																				GO:0048771	tissue remodeling	4.8805e-05	0.0012043	GO:0042176	regulation of protein catabolic process	0.000738756	0.0172764					GO:0006091	generation of precursor metabolites and energy	0.000427666	0.0105536	GO:0048286	lung alveolus development	0.000691362	0.0164811	GO:0046686	response to cadmium ion	0.00146916	0.035124	GO:2000117	negative regulation of cysteine-type endopeptidase activity	0.00159873	0.0387084	GO:0018212	peptidyl-tyrosine modification
																				GO:1902107	positive regulation of leukocyte differentiation	4.8805e-05	0.0012043	GO:0002260	lymphocyte homeostasis	0.000751239	0.0174995					GO:1903825	organic acid transmembrane transport	0.000427918	0.0105536	GO:0045088	regulation of innate immune response	0.000716249	0.016941	GO:1901342	regulation of vasculature development	0.00146961	0.035124	GO:0055022	negative regulation of cardiac muscle tissue growth	0.00161049	0.0387084	GO:0043244	regulation of protein-containing complex disassembly
																				GO:1903708	positive regulation of hemopoiesis	4.8805e-05	0.0012043	GO:0006164	purine nucleotide biosynthetic process	0.000758213	0.0175929					GO:0017157	regulation of exocytosis	0.000432339	0.010621	GO:0045862	positive regulation of proteolysis	0.000716249	0.016941	GO:0036294	cellular response to decreased oxygen levels	0.0014743	0.035124	GO:0061117	negative regulation of heart growth	0.00161049	0.0387084	GO:0031113	regulation of microtubule polymerization
																				GO:0033627	cell adhesion mediated by integrin	4.96566e-05	0.00121602	GO:0016050	vesicle organization	0.000764657	0.0176734					GO:0120032	regulation of plasma membrane bounded cell projection assembly	0.000435477	0.0106518	GO:0055017	cardiac muscle tissue growth	0.000719331	0.0169477	GO:0062012	regulation of small molecule metabolic process	0.00148559	0.0352554	GO:0008154	actin polymerization or depolymerization	0.00162527	0.0389116	GO:1990138	neuron projection extension
																				GO:0010721	negative regulation of cell development	4.96648e-05	0.00121602	GO:1901021	positive regulation of calcium ion transmembrane transporter activity	0.00080283	0.0184838					GO:0010506	regulation of autophagy	0.00043698	0.0106518	GO:2001056	positive regulation of cysteine-type endopeptidase activity	0.000730151	0.01696	GO:0009266	response to temperature stimulus	0.00149846	0.0354229	GO:0036294	cellular response to decreased oxygen levels	0.00163398	0.0389686	GO:0051048	negative regulation of secretion
																				GO:0010959	regulation of metal ion transport	5.17984e-05	0.00126336	GO:0006650	glycerophospholipid metabolic process	0.000837419	0.0192057					GO:0010507	negative regulation of autophagy	0.000440334	0.0106921	GO:0032623	interleukin-2 production	0.000735034	0.01696	GO:0048545	response to steroid hormone	0.001514	0.0356521	GO:1903201	regulation of oxidative stress-induced cell death	0.00164194	0.0390072	GO:0006664	glycolipid metabolic process
																				GO:0014065	phosphatidylinositol 3-kinase signaling	5.36022e-05	0.00129734	GO:0002820	negative regulation of adaptive immune response	0.000846305	0.0193348					GO:0009165	nucleotide biosynthetic process	0.000444227	0.0107452	GO:1904705	regulation of vascular associated smooth muscle cell proliferation	0.000735034	0.01696	GO:0015849	organic acid transport	0.00153617	0.0357808	GO:0098754	detoxification	0.00168611	0.0399025	GO:0055072	iron ion homeostasis
																				GO:0045621	positive regulation of lymphocyte differentiation	5.36022e-05	0.00129734	GO:0043162	ubiquitin-dependent protein catabolic process via the multivesicular body sorting pathway	0.000853511	0.0193573					GO:1903533	regulation of protein targeting	0.000452532	0.0109041	GO:0009746	response to hexose	0.000741969	0.01696	GO:0031331	positive regulation of cellular catabolic process	0.0015365	0.0357808	GO:0060038	cardiac muscle cell proliferation	0.00170206	0.0400585	GO:0032200	telomere organization
																				GO:0090130	tissue migration	5.57628e-05	0.00133989	GO:0060999	positive regulation of dendritic spine development	0.000853805	0.0193573					GO:0016236	macroautophagy	0.000465499	0.0111556	GO:0010952	positive regulation of peptidase activity	0.000741969	0.01696	GO:0032970	regulation of actin filament-based process	0.00153706	0.0357808	GO:1901988	negative regulation of cell cycle phase transition	0.00170572	0.0400585	GO:1901617	organic hydroxy compound biosynthetic process
																				GO:0050792	regulation of viral process	5.57845e-05	0.00133989	GO:0048511	rhythmic process	0.000866108	0.0194821					GO:0051648	vesicle localization	0.000466518	0.0111556	GO:0001657	ureteric bud development	0.000743398	0.01696	GO:1902903	regulation of supramolecular fiber organization	0.00155972	0.0360553	GO:0032984	protein-containing complex disassembly	0.00172656	0.0403423	GO:0007229	integrin-mediated signaling pathway
																				GO:0045059	positive thymic T cell selection	5.60427e-05	0.00134099	GO:0010765	positive regulation of sodium ion transport	0.000869151	0.0194821					GO:1900180	regulation of protein localization to nucleus	0.000476483	0.0113508	GO:0036503	ERAD pathway	0.000743398	0.01696	GO:0001892	embryonic placenta development	0.00156068	0.0360553	GO:2000563	positive regulation of CD4-positive, alpha-beta T cell proliferation	0.00173092	0.0403423	GO:0014910	regulation of smooth muscle cell migration
																				GO:0044282	small molecule catabolic process	5.68273e-05	0.00135463	GO:1901381	positive regulation of potassium ion transmembrane transport	0.000869151	0.0194821					GO:0006612	protein targeting to membrane	0.000480122	0.0113943	GO:0046031	ADP metabolic process	0.000743398	0.01696	GO:0006414	translational elongation	0.00158138	0.0363957	GO:0051588	regulation of neurotransmitter transport	0.00177115	0.041124	GO:0045747	positive regulation of Notch signaling pathway
																				GO:0043457	regulation of cellular respiration	5.72848e-05	0.00136041	GO:0002312	B cell activation involved in immune response	0.000883249	0.0196877					GO:0062013	positive regulation of small molecule metabolic process	0.000492401	0.0116418	GO:0002819	regulation of adaptive immune response	0.000745064	0.01696	GO:0045333	cellular respiration	0.0015902	0.0364611	GO:0006089	lactate metabolic process	0.00180402	0.0417298	GO:0060560	developmental growth involved in morphogenesis
																				GO:1901888	regulation of cell junction assembly	5.76005e-05	0.00136278	GO:0048017	inositol lipid-mediated signaling	0.000886897	0.0196877					GO:0061572	actin filament bundle organization	0.000505296	0.0119019	GO:0061572	actin filament bundle organization	0.000748589	0.0169764	GO:0035024	negative regulation of Rho protein signal transduction	0.00160624	0.0366909	GO:0016485	protein processing	0.00182407	0.0420356	GO:0031668	cellular response to extracellular stimulus
																				GO:0031348	negative regulation of defense response	5.82821e-05	0.00137376	GO:0098659	inorganic cation import across plasma membrane	0.000891579	0.0196877					GO:0050807	regulation of synapse organization	0.000509391	0.0119536	GO:0033500	carbohydrate homeostasis	0.00075212	0.0169929	GO:0050714	positive regulation of protein secretion	0.00167539	0.0379866	GO:0030258	lipid modification	0.00185368	0.0423641	GO:0110053	regulation of actin filament organization
																				GO:0009895	negative regulation of catabolic process	5.88346e-05	0.00138163	GO:0099587	inorganic ion import across plasma membrane	0.000891579	0.0196877					GO:0006282	regulation of DNA repair	0.000516865	0.0120839	GO:1902882	regulation of response to oxidative stress	0.000759779	0.0170496	GO:0061351	neural precursor cell proliferation	0.0016767	0.0379866	GO:0003018	vascular process in circulatory system	0.00185748	0.0423641	GO:0045986	negative regulation of smooth muscle contraction
																				GO:0030522	intracellular receptor signaling pathway	5.98884e-05	0.00140117	GO:0010876	lipid localization	0.000904095	0.0198408					GO:0031397	negative regulation of protein ubiquitination	0.000522515	0.0121707	GO:0001503	ossification	0.000765357	0.0170496	GO:0030522	intracellular receptor signaling pathway	0.00168165	0.0379866	GO:2001242	regulation of intrinsic apoptotic signaling pathway	0.00185898	0.0423641	GO:0060841	venous blood vessel development
																				GO:0008064	regulation of actin polymerization or depolymerization	6.07953e-05	0.00141714	GO:0030099	myeloid cell differentiation	0.000905196	0.0198408					GO:0016052	carbohydrate catabolic process	0.000528265	0.0122593	GO:0050708	regulation of protein secretion	0.000765754	0.0170496	GO:0060711	labyrinthine layer development	0.00170016	0.038167	GO:0048017	inositol lipid-mediated signaling	0.00189978	0.0431342	GO:0042692	muscle cell differentiation
																				GO:0031116	positive regulation of microtubule polymerization	6.7044e-05	0.00155705	GO:0009165	nucleotide biosynthetic process	0.000909832	0.0198691					GO:0045911	positive regulation of DNA recombination	0.00053069	0.0122703	GO:0001656	metanephros development	0.000765893	0.0170496	GO:0038128	ERBB2 signaling pathway	0.00170841	0.038167	GO:0034599	cellular response to oxidative stress	0.00191422	0.0433023	GO:0032006	regulation of TOR signaling
																				GO:0014068	positive regulation of phosphatidylinositol 3-kinase signaling	6.74805e-05	0.00156145	GO:0040015	negative regulation of multicellular organism growth	0.000923117	0.0200121					GO:0071478	cellular response to radiation	0.000534275	0.0122703	GO:0033013	tetrapyrrole metabolic process	0.000772956	0.0171438	GO:1900038	negative regulation of cellular response to hypoxia	0.00170841	0.038167	GO:0010906	regulation of glucose metabolic process	0.00193152	0.0434154	GO:0050878	regulation of body fluid levels
																				GO:1904062	regulation of monoatomic cation transmembrane transport	6.79335e-05	0.00156619	GO:2000651	positive regulation of sodium ion transmembrane transporter activity	0.000923117	0.0200121					GO:0045055	regulated exocytosis	0.000535029	0.0122703	GO:0036230	granulocyte activation	0.00077915	0.0171647	GO:0045860	positive regulation of protein kinase activity	0.00173176	0.0382798	GO:0003091	renal water homeostasis	0.00194061	0.0434154	GO:0010038	response to metal ion
																				GO:2000116	regulation of cysteine-type endopeptidase activity	7.02519e-05	0.00160797	GO:0010639	negative regulation of organelle organization	0.000939761	0.0202988					GO:0009048	dosage compensation by inactivation of X chromosome	0.000536546	0.0122703	GO:0006006	glucose metabolic process	0.000779568	0.0171647	GO:1905954	positive regulation of lipid localization	0.00173902	0.0382798	GO:1905209	positive regulation of cardiocyte differentiation	0.00194061	0.0434154	GO:2000811	negative regulation of anoikis
																				GO:0007265	Ras protein signal transduction	7.08163e-05	0.00160797	GO:0045591	positive regulation of regulatory T cell differentiation	0.000947734	0.0203969					GO:0035306	positive regulation of dephosphorylation	0.000542076	0.0123519	GO:0002699	positive regulation of immune effector process	0.000787363	0.0172735	GO:0015749	monosaccharide transmembrane transport	0.00174647	0.0382798	GO:0001961	positive regulation of cytokine-mediated signaling pathway	0.00197915	0.0434154	GO:1903432	regulation of TORC1 signaling
																				GO:0071900	regulation of protein serine/threonine kinase activity	7.11369e-05	0.00160797	GO:0032623	interleukin-2 production	0.000959006	0.020565					GO:0061615	glycolytic process through fructose-6-phosphate	0.000548335	0.0124063	GO:0031099	regeneration	0.000802161	0.0174256	GO:0030050	vesicle transport along actin filament	0.00175221	0.0382798	GO:0003229	ventricular cardiac muscle tissue development	0.00198401	0.0434154	GO:0051224	negative regulation of protein transport
																				GO:0010594	regulation of endothelial cell migration	7.1497e-05	0.00160797	GO:0021782	glial cell development	0.000985572	0.0210586					GO:0006479	protein methylation	0.000550383	0.0124063	GO:0003018	vascular process in circulatory system	0.000802536	0.0174256	GO:1900037	regulation of cellular response to hypoxia	0.00175221	0.0382798	GO:0010770	positive regulation of cell morphogenesis involved in differentiation	0.00198401	0.0434154	GO:0051258	protein polymerization
																				GO:0061081	positive regulation of myeloid leukocyte cytokine production involved in immune response	7.17825e-05	0.00160797	GO:0030518	intracellular steroid hormone receptor signaling pathway	0.00100294	0.0213529					GO:0008213	protein alkylation	0.000550383	0.0124063	GO:0051090	regulation of DNA-binding transcription factor activity	0.000803527	0.0174256	GO:1900227	positive regulation of NLRP3 inflammasome complex assembly	0.00175221	0.0382798	GO:0001841	neural tube formation	0.00198525	0.0434154	GO:0050922	negative regulation of chemotaxis
																				GO:0002886	regulation of myeloid leukocyte mediated immunity	7.20347e-05	0.00160797	GO:0048144	fibroblast proliferation	0.00102112	0.0216623					GO:1903035	negative regulation of response to wounding	0.000554645	0.0124577	GO:0032663	regulation of interleukin-2 production	0.000807763	0.0174256	GO:0006801	superoxide metabolic process	0.00177306	0.0382798	GO:0060047	heart contraction	0.00199692	0.0434154	GO:0006937	regulation of muscle contraction
																				GO:0042093	T-helper cell differentiation	7.20347e-05	0.00160797	GO:0001782	B cell homeostasis	0.0010521	0.0219371					GO:0009299	mRNA transcription	0.00056749	0.0127009	GO:1990845	adaptive thermogenesis	0.000812762	0.0174256	GO:0061138	morphogenesis of a branching epithelium	0.00178591	0.0382798	GO:0043414	macromolecule methylation	0.00200588	0.0434154	GO:0046890	regulation of lipid biosynthetic process
																				GO:0002082	regulation of oxidative phosphorylation	7.22911e-05	0.00160797	GO:0002335	mature B cell differentiation	0.0010521	0.0219371					GO:0050803	regulation of synapse structure or activity	0.000569931	0.0127103	GO:1901605	alpha-amino acid metabolic process	0.000813215	0.0174256	GO:0001738	morphogenesis of a polarized epithelium	0.00179	0.0382798	GO:0007626	locomotory behavior	0.00200737	0.0434154	GO:1903509	liposaccharide metabolic process
																				GO:0033522	histone H2A ubiquitination	7.22911e-05	0.00160797	GO:0033089	positive regulation of T cell differentiation in thymus	0.00105992	0.0219371					GO:0007431	salivary gland development	0.000573415	0.0127428	GO:0046883	regulation of hormone secretion	0.000814442	0.0174256	GO:0006688	glycosphingolipid biosynthetic process	0.00179304	0.0382798	GO:0002070	epithelial cell maturation	0.00201801	0.0434154	GO:0019439	aromatic compound catabolic process
																				GO:0090382	phagosome maturation	7.22911e-05	0.00160797	GO:0043301	negative regulation of leukocyte degranulation	0.00105992	0.0219371					GO:0071825	protein-lipid complex subunit organization	0.000587501	0.0130098	GO:0000096	sulfur amino acid metabolic process	0.000840254	0.0178517	GO:0050796	regulation of insulin secretion	0.00180375	0.0382798	GO:0016082	synaptic vesicle priming	0.00201801	0.0434154	GO:1903036	positive regulation of response to wounding
																				GO:0031346	positive regulation of cell projection organization	7.47477e-05	0.00165678	GO:0045588	positive regulation of gamma-delta T cell differentiation	0.00105992	0.0219371					GO:0051054	positive regulation of DNA metabolic process	0.000600206	0.0132445	GO:0010574	regulation of vascular endothelial growth factor production	0.000840254	0.0178517	GO:0009309	amine biosynthetic process	0.00180449	0.0382798	GO:0035739	CD4-positive, alpha-beta T cell proliferation	0.00201801	0.0434154	GO:0061339	establishment or maintenance of monopolar cell polarity
																				GO:0032535	regulation of cellular component size	7.5302e-05	0.00166323	GO:0046645	positive regulation of gamma-delta T cell activation	0.00105992	0.0219371					GO:1903305	regulation of regulated secretory pathway	0.000606222	0.0133305	GO:0062012	regulation of small molecule metabolic process	0.000846637	0.017921	GO:0014037	Schwann cell differentiation	0.00180449	0.0382798	GO:0048843	negative regulation of axon extension involved in axon guidance	0.00201801	0.0434154	GO:1904353	regulation of telomere capping
																				GO:0006637	acyl-CoA metabolic process	7.85923e-05	0.00172384	GO:0051231	spindle elongation	0.00105992	0.0219371					GO:0030522	intracellular receptor signaling pathway	0.000612273	0.0134151	GO:0032677	regulation of interleukin-8 production	0.000849435	0.017921	GO:0042401	biogenic amine biosynthetic process	0.00180449	0.0382798	GO:0048841	regulation of axon extension involved in axon guidance	0.00203933	0.0437213	GO:2000737	negative regulation of stem cell differentiation
																				GO:0035383	thioester metabolic process	7.85923e-05	0.00172384	GO:0006929	substrate-dependent cell migration	0.0010901	0.0224833					GO:0061013	regulation of mRNA catabolic process	0.000614335	0.0134151	GO:0061760	antifungal innate immune response	0.000860694	0.0180955	GO:0060997	dendritic spine morphogenesis	0.0018076	0.0382798	GO:0007015	actin filament organization	0.00209451	0.0447482	GO:0003151	outflow tract morphogenesis
																				GO:1903522	regulation of blood circulation	7.98338e-05	0.00174502	GO:0034248	regulation of amide metabolic process	0.00109686	0.0225445					GO:0046488	phosphatidylinositol metabolic process	0.000625581	0.0136134	GO:0060047	heart contraction	0.000863867	0.0180994	GO:0045017	glycerolipid biosynthetic process	0.00181729	0.0383517	GO:0001838	embryonic epithelial tube formation	0.00214884	0.0457503	GO:0035966	response to topologically incorrect protein
																				GO:0050767	regulation of neurogenesis	8.0177e-05	0.00174648	GO:0140053	mitochondrial gene expression	0.00110823	0.022627					GO:0019430	removal of superoxide radicals	0.000636423	0.0137688	GO:0061333	renal tubule morphogenesis	0.000870995	0.0181674	GO:0015850	organic hydroxy compound transport	0.00196577	0.0413421	GO:1903524	positive regulation of blood circulation	0.00216246	0.0458364	GO:0048675	axon extension
																				GO:0016574	histone ubiquitination	8.09839e-05	0.00175799	GO:0097242	amyloid-beta clearance	0.00110849	0.022627					GO:1901293	nucleoside phosphate biosynthetic process	0.000637098	0.0137688	GO:0030858	positive regulation of epithelial cell differentiation	0.000873114	0.0181674	GO:2001234	negative regulation of apoptotic signaling pathway	0.00201588	0.0422503	GO:1990138	neuron projection extension	0.00216779	0.0458364	GO:0044242	cellular lipid catabolic process
																				GO:0050821	protein stabilization	8.13743e-05	0.00175972	GO:0043268	positive regulation of potassium ion transport	0.00113476	0.0230838					GO:0061138	morphogenesis of a branching epithelium	0.000641031	0.0138063	GO:0060485	mesenchyme development	0.000876868	0.018183	GO:0031503	protein-containing complex localization	0.00204975	0.0424275	GO:0009142	nucleoside triphosphate biosynthetic process	0.00218034	0.0458422	GO:0007030	Golgi organization
																				GO:1902106	negative regulation of leukocyte differentiation	8.16208e-05	0.00175972	GO:0032663	regulation of interleukin-2 production	0.00114306	0.0231732					GO:0006887	exocytosis	0.000645821	0.013862	GO:0033622	integrin activation	0.000894361	0.0184824	GO:0021782	glial cell development	0.00205158	0.0424275	GO:0022604	regulation of cell morphogenesis	0.00218754	0.0458422	GO:0051101	regulation of DNA binding
																				GO:1901652	response to peptide	8.30305e-05	0.00178403	GO:1901293	nucleoside phosphate biosynthetic process	0.00118237	0.0238886					GO:0070372	regulation of ERK1 and ERK2 cascade	0.000649809	0.0139002	GO:0001649	osteoblast differentiation	0.000909187	0.0187249	GO:0048009	insulin-like growth factor receptor signaling pathway	0.00205697	0.0424275	GO:0002702	positive regulation of production of molecular mediator of immune response	0.00219041	0.0458422	GO:2000630	positive regulation of miRNA metabolic process
																				GO:0032755	positive regulation of interleukin-6 production	8.35706e-05	0.0017881	GO:0006090	pyruvate metabolic process	0.00119927	0.024148					GO:1903828	negative regulation of protein localization	0.000674457	0.0143785	GO:0042119	neutrophil activation	0.000923852	0.0188185	GO:0071526	semaphorin-plexin signaling pathway	0.00205697	0.0424275	GO:1904951	positive regulation of establishment of protein localization	0.00220986	0.0460925	GO:0002262	myeloid cell homeostasis
																				GO:0044743	protein transmembrane import into intracellular organelle	8.41877e-05	0.0017881	GO:0032410	negative regulation of transporter activity	0.00121914	0.0244651					GO:1902017	regulation of cilium assembly	0.000697284	0.0147643	GO:1905332	positive regulation of morphogenesis of an epithelium	0.000923852	0.0188185	GO:0050771	negative regulation of axonogenesis	0.00206215	0.0424275	GO:0042307	positive regulation of protein import into nucleus	0.00228093	0.0472543	GO:0045017	glycerolipid biosynthetic process
																				GO:0050869	negative regulation of B cell activation	8.41877e-05	0.0017881	GO:0072593	reactive oxygen species metabolic process	0.00122642	0.0245284					GO:0150115	cell-substrate junction organization	0.000698459	0.0147643	GO:0002702	positive regulation of production of molecular mediator of immune response	0.000928434	0.0188185	GO:0046486	glycerolipid metabolic process	0.00206607	0.0424275	GO:0060412	ventricular septum morphogenesis	0.00228093	0.0472543	GO:0051091	positive regulation of DNA-binding transcription factor activity
																				GO:0002698	negative regulation of immune effector process	8.43523e-05	0.0017881	GO:2000514	regulation of CD4-positive, alpha-beta T cell activation	0.00125322	0.0249251					GO:0033674	positive regulation of kinase activity	0.000699598	0.0147643	GO:0014902	myotube differentiation	0.000928434	0.0188185	GO:0098661	inorganic anion transmembrane transport	0.0020844	0.0426603	GO:0000209	protein polyubiquitination	0.00230314	0.0473524	GO:0050821	protein stabilization
																				GO:2000514	regulation of CD4-positive, alpha-beta T cell activation	8.70383e-05	0.00183887	GO:0032365	intracellular lipid transport	0.00126537	0.0249251					GO:0035296	regulation of tube diameter	0.000706493	0.0148104	GO:0042445	hormone metabolic process	0.000929272	0.0188185	GO:0019318	hexose metabolic process	0.00212605	0.0427168	GO:0007009	plasma membrane organization	0.00230674	0.0473524	GO:0043010	camera-type eye development
																				GO:0032606	type I interferon production	9.01385e-05	0.00188984	GO:0048873	homeostasis of number of cells within a tissue	0.00126537	0.0249251					GO:0097746	blood vessel diameter maintenance	0.000706493	0.0148104	GO:0055001	muscle cell development	0.000955922	0.0192937	GO:0007064	mitotic sister chromatid cohesion	0.00212919	0.0427168	GO:0002696	positive regulation of leukocyte activation	0.00230875	0.0473524	GO:0008202	steroid metabolic process
																				GO:0002294	CD4-positive, alpha-beta T cell differentiation involved in immune response	9.01468e-05	0.00188984	GO:0090224	regulation of spindle organization	0.00126537	0.0249251					GO:0032956	regulation of actin cytoskeleton organization	0.000715503	0.0149495	GO:1903531	negative regulation of secretion by cell	0.00096809	0.0194744	GO:0055064	chloride ion homeostasis	0.00212919	0.0427168	GO:0051346	negative regulation of hydrolase activity	0.00233935	0.047594	GO:0071902	positive regulation of protein serine/threonine kinase activity
																				GO:0051607	defense response to virus	9.03488e-05	0.00188984	GO:0071805	potassium ion transmembrane transport	0.00126724	0.0249251					GO:0003158	endothelium development	0.000723307	0.0150625	GO:0032637	interleukin-8 production	0.000978555	0.0194913	GO:0150146	cell junction disassembly	0.00212919	0.0427168	GO:0022411	cellular component disassembly	0.00234088	0.047594	GO:2000377	regulation of reactive oxygen species metabolic process
																				GO:0032147	activation of protein kinase activity	9.13744e-05	0.00190499	GO:0014065	phosphatidylinositol 3-kinase signaling	0.00127527	0.0250002					GO:0051017	actin filament bundle assembly	0.000727473	0.0150859	GO:0021940	positive regulation of cerebellar granule cell precursor proliferation	0.000978589	0.0194913	GO:1902993	positive regulation of amyloid precursor protein catabolic process	0.00212919	0.0427168	GO:0001843	neural tube closure	0.00234373	0.047594	GO:0010714	positive regulation of collagen metabolic process
																				GO:0030832	regulation of actin filament length	9.17167e-05	0.00190584	GO:0051168	nuclear export	0.00130969	0.0255907					GO:0042147	retrograde transport, endosome to Golgi	0.000729229	0.0150859	GO:0072102	glomerulus morphogenesis	0.000978589	0.0194913	GO:1904353	regulation of telomere capping	0.00212919	0.0427168	GO:0035966	response to topologically incorrect protein	0.00240852	0.0483209	GO:0032922	circadian regulation of gene expression
																				GO:0071806	protein transmembrane transport	9.25561e-05	0.00191697	GO:0072522	purine-containing compound biosynthetic process	0.00133123	0.0256545					GO:0016073	snRNA metabolic process	0.000736015	0.0151268	GO:0045664	regulation of neuron differentiation	0.000998977	0.0198321	GO:0006109	regulation of carbohydrate metabolic process	0.00214642	0.0428702	GO:0050773	regulation of dendrite development	0.00240852	0.0483209	GO:0031589	cell-substrate adhesion
																				GO:0016050	vesicle organization	9.29286e-05	0.0019184	GO:0051928	positive regulation of calcium ion transport	0.00133706	0.0256545					GO:1902041	regulation of extrinsic apoptotic signaling pathway via death domain receptors	0.000736015	0.0151268	GO:0097468	programmed cell death in response to reactive oxygen species	0.00100728	0.0199317	GO:0051656	establishment of organelle localization	0.00215089	0.0428702	GO:0032868	response to insulin	0.00241099	0.0483209	GO:0050867	positive regulation of cell activation
																				GO:0016579	protein deubiquitination	9.45554e-05	0.00194562	GO:0002823	negative regulation of adaptive immune response based on somatic recombination of immune receptors built from immunoglobulin superfamily domains	0.00133887	0.0256545					GO:0016482	cytosolic transport	0.000747461	0.015269	GO:0006520	amino acid metabolic process	0.00103422	0.0202755	GO:0018206	peptidyl-methionine modification	0.00217139	0.0429154	GO:0003158	endothelium development	0.00241879	0.0483209	GO:0009219	pyrimidine deoxyribonucleotide metabolic process
																				GO:2000516	positive regulation of CD4-positive, alpha-beta T cell activation	9.79099e-05	0.00200811	GO:0007080	mitotic metaphase plate congression	0.00133887	0.0256545					GO:0071827	plasma lipoprotein particle organization	0.000747791	0.015269	GO:0010563	negative regulation of phosphorus metabolic process	0.00103471	0.0202755	GO:0019693	ribose phosphate metabolic process	0.00217528	0.0429154	GO:0009791	post-embryonic development	0.00241879	0.0483209	GO:2000757	negative regulation of peptidyl-lysine acetylation
																				GO:0140546	defense response to symbiont	9.94397e-05	0.00203288	GO:0042307	positive regulation of protein import into nucleus	0.00133887	0.0256545					GO:0043966	histone H3 acetylation	0.000758516	0.0154379	GO:0045936	negative regulation of phosphate metabolic process	0.00103471	0.0202755	GO:0032102	negative regulation of response to external stimulus	0.00218054	0.0429154	GO:0008361	regulation of cell size	0.00243048	0.0483973	GO:0006986	response to unfolded protein
																				GO:0042407	cristae formation	9.99689e-05	0.00203711	GO:0046638	positive regulation of alpha-beta T cell differentiation	0.00133887	0.0256545					GO:0071897	DNA biosynthetic process	0.000762256	0.015464	GO:1903706	regulation of hemopoiesis	0.00104934	0.0203987	GO:0006650	glycerophospholipid metabolic process	0.00218131	0.0429154	GO:0044851	hair cycle phase	0.00244181	0.0484659	GO:0014909	smooth muscle cell migration
																				GO:0051056	regulation of small GTPase mediated signal transduction	0.000104965	0.00213205	GO:0033673	negative regulation of kinase activity	0.00134721	0.0256909					GO:0006164	purine nucleotide biosynthetic process	0.000775676	0.0156856	GO:0072163	mesonephric epithelium development	0.0010511	0.0203987	GO:0035966	response to topologically incorrect protein	0.00220401	0.0432023	GO:1903532	positive regulation of secretion by cell	0.00246022	0.0486445	GO:0002246	wound healing involved in inflammatory response
																				GO:0061484	hematopoietic stem cell homeostasis	0.000107187	0.0021702	GO:0044091	membrane biogenesis	0.00134942	0.0256909					GO:0035150	regulation of tube size	0.000787749	0.0158787	GO:0072164	mesonephric tubule development	0.0010511	0.0203987	GO:0060560	developmental growth involved in morphogenesis	0.00221772	0.0432023	GO:0006470	protein dephosphorylation	0.00247089	0.0486445	GO:0060352	cell adhesion molecule production
																				GO:0002753	cytosolic pattern recognition receptor signaling pathway	0.000107789	0.00217474	GO:0016311	dephosphorylation	0.00136552	0.0259143					GO:0043434	response to peptide hormone	0.000801642	0.0160523	GO:0007613	memory	0.00105646	0.0203993	GO:1900271	regulation of long-term synaptic potentiation	0.00223146	0.0432023	GO:0050678	regulation of epithelial cell proliferation	0.0025315	0.0486445	GO:1902915	negative regulation of protein polyubiquitination
																				GO:0050900	leukocyte migration	0.000108325	0.00217474	GO:0099173	postsynapse organization	0.00140072	0.0264136					GO:0030705	cytoskeleton-dependent intracellular transport	0.000803308	0.0160523	GO:0051100	negative regulation of binding	0.00105944	0.0203993	GO:0030073	insulin secretion	0.00223264	0.0432023	GO:0046928	regulation of neurotransmitter secretion	0.00254583	0.0486445	GO:0032835	glomerulus development
																				GO:0010001	glial cell differentiation	0.000108444	0.00217474	GO:1903320	regulation of protein modification by small protein conjugation or removal	0.00140072	0.0264136					GO:0072001	renal system development	0.000804019	0.0160523	GO:0048015	phosphatidylinositol-mediated signaling	0.00106123	0.0203993	GO:0009408	response to heat	0.00223839	0.0432023	GO:0044319	wound healing, spreading of cells	0.00255445	0.0486445	GO:0032271	regulation of protein polymerization
																				GO:0033077	T cell differentiation in thymus	0.000108916	0.00217729	GO:1990778	protein localization to cell periphery	0.00143621	0.026914					GO:0001657	ureteric bud development	0.000808591	0.0160925	GO:0030168	platelet activation	0.00109033	0.0208922	GO:0030148	sphingolipid biosynthetic process	0.00223839	0.0432023	GO:0090505	epiboly involved in wound healing	0.00255445	0.0486445	GO:0001780	neutrophil homeostasis
																				GO:0002822	regulation of adaptive immune response based on somatic recombination of immune receptors built from immunoglobulin superfamily domains	0.000109779	0.00218762	GO:0030336	negative regulation of cell migration	0.00143632	0.026914					GO:0043393	regulation of protein binding	0.000811538	0.0161002	GO:0043550	regulation of lipid kinase activity	0.00109602	0.020935	GO:0046942	carboxylic acid transport	0.00226942	0.0436371	GO:0048705	skeletal system morphogenesis	0.00257885	0.0486445	GO:0010875	positive regulation of cholesterol efflux
																				GO:0002293	alpha-beta T cell differentiation involved in immune response	0.000112187	0.00222158	GO:0009150	purine ribonucleotide metabolic process	0.00146268	0.0273217					GO:0042157	lipoprotein metabolic process	0.000820999	0.0162367	GO:0003015	heart process	0.00111347	0.0212014	GO:0007212	dopamine receptor signaling pathway	0.00229308	0.0436371	GO:0010976	positive regulation of neuron projection development	0.0025841	0.0486445	GO:0032816	positive regulation of natural killer cell activation
																				GO:0046637	regulation of alpha-beta T cell differentiation	0.000112187	0.00222158	GO:0022898	regulation of transmembrane transporter activity	0.00148412	0.0276353					GO:0061365	positive regulation of triglyceride lipase activity	0.000828024	0.0163243	GO:0055006	cardiac cell development	0.0011184	0.0212286	GO:0034381	plasma lipoprotein particle clearance	0.00229308	0.0436371	GO:0032873	negative regulation of stress-activated MAPK cascade	0.00259672	0.0486445	GO:0042178	xenobiotic catabolic process
																				GO:0034341	response to type II interferon	0.000112905	0.00222881	GO:0045576	mast cell activation	0.00149689	0.0277861					GO:0007224	smoothened signaling pathway	0.000836529	0.0164076	GO:0006919	activation of cysteine-type endopeptidase activity involved in apoptotic process	0.00112386	0.0212656	GO:0051084	'de novo' post-translational protein folding	0.00229308	0.0436371	GO:0070303	negative regulation of stress-activated protein kinase signaling cascade	0.00259672	0.0486445	GO:0051642	centrosome localization
																				GO:0030099	myeloid cell differentiation	0.000114192	0.0022472	GO:1901019	regulation of calcium ion transmembrane transporter activity	0.00153306	0.0282807					GO:0007584	response to nutrient	0.000837471	0.0164076	GO:0038084	vascular endothelial growth factor signaling pathway	0.00113576	0.0213572	GO:0048661	positive regulation of smooth muscle cell proliferation	0.00229669	0.0436371	GO:1905207	regulation of cardiocyte differentiation	0.00260446	0.0486445	GO:0042987	amyloid precursor protein catabolic process
																				GO:0032608	interferon-beta production	0.000115702	0.00225583	GO:1901379	regulation of potassium ion transmembrane transport	0.00153306	0.0282807					GO:0033044	regulation of chromosome organization	0.000849031	0.0165825	GO:1901031	regulation of response to reactive oxygen species	0.00113576	0.0213572	GO:0015914	phospholipid transport	0.00231251	0.0436657	GO:0060606	tube closure	0.00261132	0.0486445	GO:0003148	outflow tract septum morphogenesis
																				GO:0032648	regulation of interferon-beta production	0.000115702	0.00225583	GO:1903169	regulation of calcium ion transmembrane transport	0.00158049	0.0290653					GO:0043487	regulation of RNA stability	0.000877126	0.0170782	GO:0031214	biomineral tissue development	0.00115274	0.0216094	GO:0019915	lipid storage	0.00231251	0.0436657	GO:0048562	embryonic organ morphogenesis	0.00261717	0.0486445	GO:0022604	regulation of cell morphogenesis
																				GO:0051148	negative regulation of muscle cell differentiation	0.000115702	0.00225583	GO:2000379	positive regulation of reactive oxygen species metabolic process	0.00161939	0.0296888					GO:0032204	regulation of telomere maintenance	0.000890769	0.0172371	GO:0051250	negative regulation of lymphocyte activation	0.00115753	0.0216322	GO:0002573	myeloid leukocyte differentiation	0.00233543	0.0439624	GO:1901653	cellular response to peptide	0.00261717	0.0486445	GO:0048193	Golgi vesicle transport
																				GO:0060349	bone morphogenesis	0.000117516	0.00228415	GO:2000377	regulation of reactive oxygen species metabolic process	0.00163789	0.0299357					GO:1900182	positive regulation of protein localization to nucleus	0.000890769	0.0172371	GO:2000310	regulation of NMDA receptor activity	0.00116554	0.0216476	GO:0001659	temperature homeostasis	0.00234946	0.0439825	GO:0016051	carbohydrate biosynthetic process	0.00261754	0.0486445	GO:1902895	positive regulation of miRNA transcription
																				GO:0097553	calcium ion transmembrane import into cytosol	0.000118427	0.0022948	GO:2000146	negative regulation of cell motility	0.00164528	0.0299363					GO:0036119	response to platelet-derived growth factor	0.000896846	0.0173014	GO:0043280	positive regulation of cysteine-type endopeptidase activity involved in apoptotic process	0.00117132	0.0216476	GO:0001890	placenta development	0.00235093	0.0439825	GO:0046578	regulation of Ras protein signal transduction	0.00262222	0.0486445	GO:0035023	regulation of Rho protein signal transduction
																				GO:0003015	heart process	0.000119595	0.00231034	GO:0032649	regulation of type II interferon production	0.00164801	0.0299363					GO:0009060	aerobic respiration	0.000906048	0.0174255	GO:0010595	positive regulation of endothelial cell migration	0.00117532	0.0216476	GO:0008277	regulation of G protein-coupled receptor signaling pathway	0.00236127	0.0440409	GO:0036465	synaptic vesicle recycling	0.00262565	0.0486445	GO:2000278	regulation of DNA biosynthetic process
																				GO:0044242	cellular lipid catabolic process	0.000120006	0.00231121	GO:0001959	regulation of cytokine-mediated signaling pathway	0.00167219	0.0300476					GO:0061951	establishment of protein localization to plasma membrane	0.000916824	0.017579	GO:0020027	hemoglobin metabolic process	0.00117623	0.0216476	GO:0098657	import into cell	0.00239264	0.0444109	GO:1900407	regulation of cellular response to oxidative stress	0.00262565	0.0486445	GO:0000097	sulfur amino acid biosynthetic process
																				GO:0051962	positive regulation of nervous system development	0.000123699	0.0023751	GO:0002702	positive regulation of production of molecular mediator of immune response	0.00167219	0.0300476					GO:0051168	nuclear export	0.000934787	0.0178689	GO:0045606	positive regulation of epidermal cell differentiation	0.00117623	0.0216476	GO:0048488	synaptic vesicle endocytosis	0.00239567	0.0444109	GO:0006986	response to unfolded protein	0.00265049	0.0486445	GO:0006244	pyrimidine nucleotide catabolic process
																				GO:0071346	cellular response to type II interferon	0.000125218	0.00239697	GO:0009895	negative regulation of catabolic process	0.00167437	0.0300476					GO:0007549	dosage compensation	0.000946036	0.0179568	GO:0002700	regulation of production of molecular mediator of immune response	0.00119584	0.0218736	GO:0006656	phosphatidylcholine biosynthetic process	0.00241501	0.0446337	GO:0030330	DNA damage response, signal transduction by p53 class mediator	0.00266437	0.0486445	GO:1902287	semaphorin-plexin signaling pathway involved in axon guidance
																				GO:0097191	extrinsic apoptotic signaling pathway	0.000126896	0.00241912	GO:0032386	regulation of intracellular transport	0.00167437	0.0300476					GO:1903008	organelle disassembly	0.000946535	0.0179568	GO:0010517	regulation of phospholipase activity	0.00119935	0.0218736	GO:0090150	establishment of protein localization to membrane	0.00244822	0.0450699	GO:0035315	hair cell differentiation	0.00266437	0.0486445	GO:2000232	regulation of rRNA processing
																				GO:0070588	calcium ion transmembrane transport	0.000127141	0.00241912	GO:0050766	positive regulation of phagocytosis	0.00168497	0.0301149					GO:0031398	positive regulation of protein ubiquitination	0.000947952	0.0179568	GO:0045912	negative regulation of carbohydrate metabolic process	0.00119935	0.0218736	GO:0033157	regulation of intracellular protein transport	0.00245339	0.0450699	GO:0070231	T cell apoptotic process	0.00266437	0.0486445	GO:0008033	tRNA processing
																				GO:0002274	myeloid leukocyte activation	0.000128371	0.0024352	GO:0006869	lipid transport	0.00168826	0.0301149					GO:1901796	regulation of signal transduction by p53 class mediator	0.000959504	0.0181211	GO:0042303	molting cycle	0.00121093	0.0219526	GO:0006644	phospholipid metabolic process	0.00249301	0.0452509	GO:0001503	ossification	0.0026659	0.0486445	GO:0045638	negative regulation of myeloid cell differentiation
																				GO:0032271	regulation of protein polymerization	0.000130072	0.00245244	GO:0045724	positive regulation of cilium assembly	0.00171891	0.0304786					GO:2001242	regulation of intrinsic apoptotic signaling pathway	0.000975297	0.0182991	GO:0042633	hair cycle	0.00121093	0.0219526	GO:2000116	regulation of cysteine-type endopeptidase activity	0.00250171	0.0452509	GO:0043500	muscle adaptation	0.00266694	0.0486445	GO:0150115	cell-substrate junction organization
																				GO:0019932	second-messenger-mediated signaling	0.000130238	0.00245244	GO:0050858	negative regulation of antigen receptor-mediated signaling pathway	0.00171891	0.0304786					GO:0001558	regulation of cell growth	0.000981311	0.0182991	GO:0098657	import into cell	0.00123021	0.0222356	GO:1990138	neuron projection extension	0.00251422	0.0452509	GO:0001974	blood vessel remodeling	0.00271088	0.0486445	GO:0006605	protein targeting
																				GO:0007249	I-kappaB kinase/NF-kappaB signaling	0.000130445	0.00245244	GO:0060996	dendritic spine development	0.00174721	0.0308881					GO:0051000	positive regulation of nitric-oxide synthase activity	0.00098348	0.0182991	GO:0051897	positive regulation of protein kinase B signaling	0.00124361	0.0224109	GO:0015693	magnesium ion transport	0.00251546	0.0452509	GO:0051591	response to cAMP	0.00271088	0.0486445	GO:0045766	positive regulation of angiogenesis
																				GO:0008637	apoptotic mitochondrial changes	0.000131988	0.00246678	GO:0042492	gamma-delta T cell differentiation	0.00178296	0.0314267					GO:0080182	histone H3-K4 trimethylation	0.00098348	0.0182991	GO:1904950	negative regulation of establishment of protein localization	0.00125516	0.0224153	GO:0042416	dopamine biosynthetic process	0.00251546	0.0452509	GO:1901605	alpha-amino acid metabolic process	0.00271635	0.0486445	GO:1904018	positive regulation of vasculature development
																				GO:0038127	ERBB signaling pathway	0.000131988	0.00246678	GO:0120163	negative regulation of cold-induced thermogenesis	0.0017975	0.0315892					GO:1903232	melanosome assembly	0.00098348	0.0182991	GO:0000271	polysaccharide biosynthetic process	0.00126058	0.0224153	GO:1902950	regulation of dendritic spine maintenance	0.00251546	0.0452509	GO:0044262	cellular carbohydrate metabolic process	0.00271898	0.0486445	GO:0043393	regulation of protein binding
																				GO:0048738	cardiac muscle tissue development	0.000132409	0.00246733	GO:0001818	negative regulation of cytokine production	0.00182839	0.0319165					GO:0001837	epithelial to mesenchymal transition	0.000987849	0.0183161	GO:0010761	fibroblast migration	0.00126058	0.0224153	GO:0016042	lipid catabolic process	0.00252106	0.0452509	GO:0009215	purine deoxyribonucleoside triphosphate metabolic process	0.00274776	0.0486445	GO:0010721	negative regulation of cell development
																				GO:0006839	mitochondrial transport	0.000134494	0.00249882	GO:0045860	positive regulation of protein kinase activity	0.00182995	0.0319165					GO:1990778	protein localization to cell periphery	0.000990215	0.0183161	GO:0086003	cardiac muscle cell contraction	0.00126058	0.0224153	GO:0000041	transition metal ion transport	0.00252259	0.0452509	GO:0030388	fructose 1,6-bisphosphate metabolic process	0.00274776	0.0486445	GO:0009247	glycolipid biosynthetic process
																				GO:0007006	mitochondrial membrane organization	0.00013873	0.00256494	GO:0048738	cardiac muscle tissue development	0.00183282	0.0319165					GO:0032869	cellular response to insulin stimulus	0.00102641	0.01893	GO:0016052	carbohydrate catabolic process	0.00126236	0.0224153	GO:0045834	positive regulation of lipid metabolic process	0.00255698	0.0457212	GO:0048312	intracellular distribution of mitochondria	0.00274776	0.0486445	GO:0043433	negative regulation of DNA-binding transcription factor activity
																				GO:0002287	alpha-beta T cell activation involved in immune response	0.000138865	0.00256494	GO:0043300	regulation of leukocyte degranulation	0.00183761	0.0319165					GO:0007269	neurotransmitter secretion	0.00104302	0.0191241	GO:0043281	regulation of cysteine-type endopeptidase activity involved in apoptotic process	0.00129125	0.0227881	GO:1904659	glucose transmembrane transport	0.00256381	0.0457212	GO:0060453	regulation of gastric acid secretion	0.00274776	0.0486445	GO:0031109	microtubule polymerization or depolymerization
																				GO:0002720	positive regulation of cytokine production involved in immune response	0.000150997	0.00278089	GO:0045132	meiotic chromosome segregation	0.00186614	0.0323174					GO:0099643	signal release from synapse	0.00104302	0.0191241	GO:0002040	sprouting angiogenesis	0.00129623	0.0227881	GO:0070371	ERK1 and ERK2 cascade	0.00258323	0.0459333	GO:0060525	prostate glandular acinus development	0.00274776	0.0486445	GO:0008380	RNA splicing
																				GO:0045582	positive regulation of T cell differentiation	0.00015412	0.00282196	GO:0072659	protein localization to plasma membrane	0.00187193	0.0323235					GO:0034446	substrate adhesion-dependent cell spreading	0.00105995	0.019378	GO:0032612	interleukin-1 production	0.00129623	0.0227881	GO:0072329	monocarboxylic acid catabolic process	0.00260679	0.0462175	GO:1901030	positive regulation of mitochondrial outer membrane permeabilization involved in apoptotic signaling pathway	0.00274776	0.0486445	GO:0030148	sphingolipid biosynthetic process
																				GO:1903707	negative regulation of hemopoiesis	0.00015412	0.00282196	GO:0002637	regulation of immunoglobulin production	0.00189236	0.0325816					GO:0006898	receptor-mediated endocytosis	0.00106672	0.0194453	GO:0043254	regulation of protein-containing complex assembly	0.00129841	0.0227881	GO:0043547	positive regulation of GTPase activity	0.00262454	0.0463972	GO:0006892	post-Golgi vesicle-mediated transport	0.00275365	0.0486445	GO:0070252	actin-mediated cell contraction
																				GO:0048015	phosphatidylinositol-mediated signaling	0.000154918	0.00282837	GO:0040013	negative regulation of locomotion	0.00191106	0.0328084					GO:0050878	regulation of body fluid levels	0.00107941	0.0194514	GO:0001818	negative regulation of cytokine production	0.00131698	0.0229807	GO:1903532	positive regulation of secretion by cell	0.00264682	0.046656	GO:0048732	gland development	0.00275429	0.0486445	GO:0002686	negative regulation of leukocyte migration
																				GO:0006470	protein dephosphorylation	0.000156629	0.00285137	GO:0050900	leukocyte migration	0.00193857	0.0331848					GO:0000469	cleavage involved in rRNA processing	0.00107943	0.0194514	GO:0042593	glucose homeostasis	0.00131698	0.0229807	GO:0061098	positive regulation of protein tyrosine kinase activity	0.00266938	0.0467831	GO:0034504	protein localization to nucleus	0.00276776	0.0486445	GO:0001704	formation of primary germ layer
																				GO:0051282	regulation of sequestering of calcium ion	0.000160177	0.00290758	GO:1905475	regulation of protein localization to membrane	0.00196368	0.0335118					GO:0071480	cellular response to gamma radiation	0.00107943	0.0194514	GO:0016051	carbohydrate biosynthetic process	0.00135736	0.0235641	GO:0071825	protein-lipid complex subunit organization	0.00266938	0.0467831	GO:2000146	negative regulation of cell motility	0.00276776	0.0486445	GO:0003179	heart valve morphogenesis
																				GO:0002292	T cell differentiation involved in immune response	0.000161362	0.00291914	GO:1902305	regulation of sodium ion transmembrane transport	0.00196896	0.0335118					GO:1900242	regulation of synaptic vesicle endocytosis	0.00107943	0.0194514	GO:0002065	columnar/cuboidal epithelial cell differentiation	0.00135984	0.0235641	GO:0046390	ribose phosphate biosynthetic process	0.00268355	0.0468612	GO:0060044	negative regulation of cardiac muscle cell proliferation	0.00277193	0.0486445	GO:0019216	regulation of lipid metabolic process
																				GO:0034329	cell junction assembly	0.000161738	0.00291914	GO:2000112	regulation of cellular macromolecule biosynthetic process	0.00198206	0.0336383					GO:0110053	regulation of actin filament organization	0.00109746	0.0197197	GO:1901987	regulation of cell cycle phase transition	0.00136651	0.0235641	GO:0008637	apoptotic mitochondrial changes	0.00268943	0.0468612	GO:0098693	regulation of synaptic vesicle cycle	0.00277193	0.0486445	GO:0009260	ribonucleotide biosynthetic process
																				GO:0090150	establishment of protein localization to membrane	0.000162625	0.00292679	GO:0048145	regulation of fibroblast proliferation	0.00199214	0.0337132					GO:0009123	nucleoside monophosphate metabolic process	0.00110251	0.019754	GO:0097529	myeloid leukocyte migration	0.00137233	0.0235641	GO:0043491	protein kinase B signaling	0.00271756	0.0468612	GO:0001822	kidney development	0.00277494	0.0486445	GO:0061842	microtubule organizing center localization
																				GO:0006874	intracellular calcium ion homeostasis	0.00016639	0.00298605	GO:0043401	steroid hormone mediated signaling pathway	0.00205811	0.0347306					GO:0050821	protein stabilization	0.00110925	0.0198184	GO:0048017	inositol lipid-mediated signaling	0.00137298	0.0235641	GO:0048771	tissue remodeling	0.00271756	0.0468612	GO:0003208	cardiac ventricle morphogenesis	0.00279361	0.0488326	GO:0022612	gland morphogenesis
																				GO:0008286	insulin receptor signaling pathway	0.00016915	0.00302354	GO:0009141	nucleoside triphosphate metabolic process	0.00206793	0.0347735					GO:0060998	regulation of dendritic spine development	0.0011274	0.0200856	GO:0055007	cardiac muscle cell differentiation	0.00137376	0.0235641	GO:0031663	lipopolysaccharide-mediated signaling pathway	0.00272474	0.0468612	GO:0048839	inner ear development	0.00281681	0.0490987	GO:0044282	small molecule catabolic process
																				GO:0045579	positive regulation of B cell differentiation	0.000169437	0.00302354	GO:0007416	synapse assembly	0.00208593	0.0347735					GO:1902622	regulation of neutrophil migration	0.00114232	0.020294	GO:0050672	negative regulation of lymphocyte proliferation	0.00142308	0.0243411	GO:0007626	locomotory behavior	0.00274258	0.0468612					GO:0060537	muscle tissue development
																				GO:0038061	NIK/NF-kappaB signaling	0.000172045	0.00306143	GO:0031396	regulation of protein ubiquitination	0.00208593	0.0347735					GO:0006506	GPI anchor biosynthetic process	0.00118679	0.0209179	GO:0006949	syncytium formation	0.00145216	0.0246342	GO:0033143	regulation of intracellular steroid hormone receptor signaling pathway	0.00274461	0.0468612					GO:0002761	regulation of myeloid leukocyte differentiation
																				GO:0002440	production of molecular mediator of immune response	0.000172815	0.00306502	GO:0001776	leukocyte homeostasis	0.00209267	0.0347735					GO:0035066	positive regulation of histone acetylation	0.00118679	0.0209179	GO:0010715	regulation of extracellular matrix disassembly	0.00145244	0.0246342	GO:2000379	positive regulation of reactive oxygen species metabolic process	0.00274461	0.0468612					GO:0003272	endocardial cushion formation
																				GO:0050708	regulation of protein secretion	0.000173217	0.00306502	GO:0007030	Golgi organization	0.00209267	0.0347735					GO:0090068	positive regulation of cell cycle process	0.00118742	0.0209179	GO:0072088	nephron epithelium morphogenesis	0.00145725	0.0246342	GO:0032872	regulation of stress-activated MAPK cascade	0.00274535	0.0468612					GO:0005996	monosaccharide metabolic process
																				GO:0046636	negative regulation of alpha-beta T cell activation	0.000175826	0.00310249	GO:0007064	mitotic sister chromatid cohesion	0.00209578	0.0347735					GO:0061045	negative regulation of wound healing	0.00119143	0.02093	GO:0001823	mesonephros development	0.00146162	0.0246342	GO:0007613	memory	0.00275355	0.0468612					GO:0019915	lipid storage
																				GO:0043547	positive regulation of GTPase activity	0.000179822	0.00316416	GO:0006469	negative regulation of protein kinase activity	0.00210795	0.0348735					GO:0045923	positive regulation of fatty acid metabolic process	0.001198	0.0209723	GO:0006165	nucleoside diphosphate phosphorylation	0.00146162	0.0246342	GO:2001244	positive regulation of intrinsic apoptotic signaling pathway	0.00275835	0.0468612					GO:0050709	negative regulation of protein secretion
																				GO:0009062	fatty acid catabolic process	0.000180981	0.00317572	GO:0010675	regulation of cellular carbohydrate metabolic process	0.00211354	0.0348735					GO:0043488	regulation of mRNA stability	0.00120051	0.0209723	GO:0014013	regulation of gliogenesis	0.0014687	0.0246342	GO:0006457	protein folding	0.0027734	0.046986					GO:0019395	fatty acid oxidation
																				GO:0032386	regulation of intracellular transport	0.000188885	0.00330522	GO:0009259	ribonucleotide metabolic process	0.00213036	0.0350536					GO:1902624	positive regulation of neutrophil migration	0.00123169	0.0213828	GO:0033559	unsaturated fatty acid metabolic process	0.0014687	0.0246342	GO:0051961	negative regulation of nervous system development	0.00278119	0.0469875					GO:0043491	protein kinase B signaling
																				GO:0001959	regulation of cytokine-mediated signaling pathway	0.000194589	0.00338628	GO:0002218	activation of innate immune response	0.00215675	0.0352924					GO:0072163	mesonephric epithelium development	0.00123421	0.0213828	GO:0030856	regulation of epithelial cell differentiation	0.00150197	0.0251227	GO:0006458	'de novo' protein folding	0.0028255	0.0474731					GO:0009062	fatty acid catabolic process
																				GO:0008360	regulation of cell shape	0.000194589	0.00338628	GO:1903828	negative regulation of protein localization	0.00215675	0.0352924					GO:0072164	mesonephric tubule development	0.00123421	0.0213828	GO:2000116	regulation of cysteine-type endopeptidase activity	0.00152132	0.0253763	GO:0060674	placenta blood vessel development	0.0028255	0.0474731					GO:0010712	regulation of collagen metabolic process
																				GO:0006936	muscle contraction	0.000198976	0.00344377	GO:0007093	mitotic cell cycle checkpoint signaling	0.00216966	0.0353863					GO:0010970	transport along microtubule	0.001247	0.021545	GO:0051962	positive regulation of nervous system development	0.00156371	0.0260099	GO:0008645	hexose transmembrane transport	0.00285661	0.0478639					GO:0045601	regulation of endothelial cell differentiation
																				GO:0002532	production of molecular mediator involved in inflammatory response	0.000200004	0.00344377	GO:0044262	cellular carbohydrate metabolic process	0.00217441	0.0353863					GO:0009991	response to extracellular stimulus	0.00125804	0.0216761	GO:0033625	positive regulation of integrin activation	0.0015679	0.0260099	GO:0034260	negative regulation of GTPase activity	0.00288386	0.048188					GO:1901216	positive regulation of neuron death
																				GO:0051147	regulation of muscle cell differentiation	0.000200035	0.00344377	GO:0002718	regulation of cytokine production involved in immune response	0.00218576	0.0354738					GO:0006643	membrane lipid metabolic process	0.00127723	0.0218564	GO:0071800	podosome assembly	0.00157564	0.0260669	GO:0006665	sphingolipid metabolic process	0.00293562	0.0489191					GO:0042326	negative regulation of phosphorylation
																				GO:0030041	actin filament polymerization	0.000200073	0.00344377	GO:0022604	regulation of cell morphogenesis	0.00219493	0.0355256					GO:0048754	branching morphogenesis of an epithelial tube	0.00127723	0.0218564	GO:0060048	cardiac muscle contraction	0.00158048	0.0260758	GO:0050678	regulation of epithelial cell proliferation	0.00296077	0.0492036					GO:0046942	carboxylic acid transport
																				GO:0034765	regulation of monoatomic ion transmembrane transport	0.000206344	0.00354205	GO:0002456	T cell mediated immunity	0.00222533	0.0358224					GO:0009081	branched-chain amino acid metabolic process	0.0012824	0.0218564	GO:0032945	negative regulation of mononuclear cell proliferation	0.00159995	0.026254	GO:0048593	camera-type eye morphogenesis	0.00298004	0.0493893					GO:0000266	mitochondrial fission
																				GO:0016053	organic acid biosynthetic process	0.000208199	0.00356421	GO:0055007	cardiac muscle cell differentiation	0.00222533	0.0358224					GO:0150105	protein localization to cell-cell junction	0.0012824	0.0218564	GO:1901992	positive regulation of mitotic cell cycle phase transition	0.00159995	0.026254	GO:1901605	alpha-amino acid metabolic process	0.00299682	0.0495328					GO:0043534	blood vessel endothelial cell migration
																				GO:0007173	epidermal growth factor receptor signaling pathway	0.000213056	0.00362769	GO:0046637	regulation of alpha-beta T cell differentiation	0.00223844	0.0359361					GO:0031124	mRNA 3'-end processing	0.0013097	0.0222014	GO:0002443	leukocyte mediated immunity	0.0016149	0.0262621									GO:0043954	cellular component maintenance
																				GO:0090263	positive regulation of canonical Wnt signaling pathway	0.000213056	0.00362769	GO:0120032	regulation of plasma membrane bounded cell projection assembly	0.0022612	0.0361479					GO:0035065	regulation of histone acetylation	0.0013097	0.0222014	GO:0002262	myeloid cell homeostasis	0.00161819	0.0262621									GO:0060411	cardiac septum morphogenesis
																				GO:0051208	sequestering of calcium ion	0.000214848	0.00364838	GO:0051348	negative regulation of transferase activity	0.00226381	0.0361479					GO:2000756	regulation of peptidyl-lysine acetylation	0.00131925	0.0223032	GO:0006081	cellular aldehyde metabolic process	0.00162127	0.0262621									GO:0016197	endosomal transport
																				GO:0062125	regulation of mitochondrial gene expression	0.000221538	0.00375188	GO:0051896	regulation of protein kinase B signaling	0.00228181	0.0363377					GO:0032102	negative regulation of response to external stimulus	0.00133267	0.0224695	GO:0050854	regulation of antigen receptor-mediated signaling pathway	0.00162127	0.0262621									GO:0051896	regulation of protein kinase B signaling
																				GO:0048017	inositol lipid-mediated signaling	0.00022561	0.00381064	GO:0032755	positive regulation of interleukin-6 production	0.00232904	0.0369907					GO:0007249	I-kappaB kinase/NF-kappaB signaling	0.00134157	0.0225592	GO:1903034	regulation of response to wounding	0.00162214	0.0262621									GO:0006914	autophagy
																				GO:0006937	regulation of muscle contraction	0.000226976	0.00382349	GO:0010506	regulation of autophagy	0.00238566	0.037735					GO:0010565	regulation of cellular ketone metabolic process	0.00138207	0.0231007	GO:0010959	regulation of metal ion transport	0.00163491	0.0263983									GO:0061919	process utilizing autophagic mechanism
																				GO:0007160	cell-matrix adhesion	0.000227692	0.00382535	GO:0060099	regulation of phagocytosis, engulfment	0.00239114	0.037735					GO:0031056	regulation of histone modification	0.00138207	0.0231007	GO:0019320	hexose catabolic process	0.00165073	0.0264213									GO:0002181	cytoplasmic translation
																				GO:0051656	establishment of organelle localization	0.000233471	0.00391203	GO:0030048	actin filament-based movement	0.00239497	0.037735					GO:0003279	cardiac septum development	0.00138479	0.0231007	GO:0090218	positive regulation of lipid kinase activity	0.00165073	0.0264213									GO:0048268	clathrin coat assembly
																				GO:0050688	regulation of defense response to virus	0.000237902	0.00395895	GO:0043271	negative regulation of monoatomic ion transport	0.00241366	0.0379289					GO:0006367	transcription initiation at RNA polymerase II promoter	0.00139015	0.0231287	GO:0022411	cellular component disassembly	0.00165379	0.0264213									GO:0090136	epithelial cell-cell adhesion
																				GO:0051279	regulation of release of sequestered calcium ion into cytosol	0.000237902	0.00395895	GO:0016197	endosomal transport	0.00245363	0.0384553					GO:0071482	cellular response to light stimulus	0.00141126	0.023395	GO:0044772	mitotic cell cycle phase transition	0.00165379	0.0264213									GO:0099550	trans-synaptic signaling, modulating synaptic transmission
																				GO:0072659	protein localization to plasma membrane	0.000238151	0.00395895	GO:1901991	negative regulation of mitotic cell cycle phase transition	0.00246133	0.0384745					GO:0070828	heterochromatin organization	0.00141359	0.023395	GO:1905330	regulation of morphogenesis of an epithelium	0.00166742	0.026569									GO:1902001	fatty acid transmembrane transport
																				GO:0043405	regulation of MAP kinase activity	0.00023961	0.00397275	GO:0032609	type II interferon production	0.00249409	0.0387298					GO:0070371	ERK1 and ERK2 cascade	0.00142078	0.0234294	GO:0014068	positive regulation of phosphatidylinositol 3-kinase signaling	0.00167303	0.0265885									GO:1902285	semaphorin-plexin signaling pathway involved in neuron projection guidance
																				GO:0032715	negative regulation of interleukin-6 production	0.000242148	0.00400432	GO:0002369	T cell cytokine production	0.00249722	0.0387298					GO:0071902	positive regulation of protein serine/threonine kinase activity	0.00142312	0.0234294	GO:0035051	cardiocyte differentiation	0.00170015	0.0269487									GO:1904355	positive regulation of telomere capping
																				GO:0019216	regulation of lipid metabolic process	0.000242874	0.00400584	GO:1990573	potassium ion import across plasma membrane	0.00249722	0.0387298					GO:0014911	positive regulation of smooth muscle cell migration	0.00145276	0.0236527	GO:0030316	osteoclast differentiation	0.00174147	0.0275315									GO:0007009	plasma membrane organization
																				GO:0031345	negative regulation of cell projection organization	0.000248922	0.0040949	GO:1902115	regulation of organelle assembly	0.00255615	0.0395405					GO:0050854	regulation of antigen receptor-mediated signaling pathway	0.00145276	0.0236527	GO:0006096	glycolytic process	0.00179498	0.0282302									GO:0007100	mitotic centrosome separation
																				GO:0019318	hexose metabolic process	0.000251039	0.00411899	GO:0030308	negative regulation of cell growth	0.00259639	0.0398685					GO:0009083	branched-chain amino acid catabolic process	0.00146678	0.0236527	GO:0048814	regulation of dendrite morphogenesis	0.00179498	0.0282302									GO:0009222	pyrimidine ribonucleotide catabolic process
																				GO:0070997	neuron death	0.00025488	0.00417118	GO:0001779	natural killer cell differentiation	0.0026042	0.0398685					GO:0034377	plasma lipoprotein particle assembly	0.00146678	0.0236527	GO:0014015	positive regulation of gliogenesis	0.00185884	0.0290085									GO:0021683	cerebellar granular layer morphogenesis
																				GO:0034763	negative regulation of transmembrane transport	0.000257915	0.00420995	GO:0006099	tricarboxylic acid cycle	0.0026042	0.0398685					GO:0036120	cellular response to platelet-derived growth factor stimulus	0.00146678	0.0236527	GO:0035023	regulation of Rho protein signal transduction	0.00185884	0.0290085									GO:0042994	cytoplasmic sequestering of transcription factor
																				GO:0005996	monosaccharide metabolic process	0.000259052	0.00421761	GO:0090322	regulation of superoxide metabolic process	0.0026042	0.0398685					GO:0042772	DNA damage response, signal transduction resulting in transcription	0.00146678	0.0236527	GO:1900407	regulation of cellular response to oxidative stress	0.00185884	0.0290085									GO:1905522	negative regulation of macrophage migration
																				GO:0014741	negative regulation of muscle hypertrophy	0.000260514	0.00421965	GO:0070373	negative regulation of ERK1 and ERK2 cascade	0.00262078	0.0399921					GO:0061620	glycolytic process through glucose-6-phosphate	0.00146678	0.0236527	GO:0060419	heart growth	0.00187116	0.0291256									GO:1990535	neuron projection maintenance
																				GO:0031112	positive regulation of microtubule polymerization or depolymerization	0.000260514	0.00421965	GO:0045185	maintenance of protein location	0.00262575	0.0399921					GO:1900037	regulation of cellular response to hypoxia	0.00146678	0.0236527	GO:0009914	hormone transport	0.0019001	0.0293096									GO:0015849	organic acid transport
																				GO:0001894	tissue homeostasis	0.00027013	0.00435309	GO:1902904	negative regulation of supramolecular fiber organization	0.00265269	0.0401007					GO:0034063	stress granule assembly	0.00147102	0.0236605	GO:0010460	positive regulation of heart rate	0.00190234	0.0293096									GO:0072594	establishment of protein localization to organelle
																				GO:0060249	anatomical structure homeostasis	0.00027013	0.00435309	GO:0042753	positive regulation of circadian rhythm	0.00265312	0.0401007					GO:0048193	Golgi vesicle transport	0.0014798	0.023737	GO:0060907	positive regulation of macrophage cytokine production	0.00190234	0.0293096									GO:1903008	organelle disassembly
																				GO:0042058	regulation of epidermal growth factor receptor signaling pathway	0.000271983	0.0043718	GO:1904031	positive regulation of cyclin-dependent protein kinase activity	0.00265312	0.0401007					GO:0007183	SMAD protein complex assembly	0.0014871	0.023737	GO:1903055	positive regulation of extracellular matrix organization	0.00190234	0.0293096									GO:0006869	lipid transport
																				GO:0060314	regulation of ryanodine-sensitive calcium-release channel activity	0.00027486	0.00439567	GO:0031398	positive regulation of protein ubiquitination	0.00273623	0.0411064					GO:0072711	cellular response to hydroxyurea	0.0014871	0.023737	GO:0060993	kidney morphogenesis	0.00191195	0.0293828									GO:0001959	regulation of cytokine-mediated signaling pathway
																				GO:1904754	positive regulation of vascular associated smooth muscle cell migration	0.00027486	0.00439567	GO:0021700	developmental maturation	0.00273749	0.0411064					GO:0042304	regulation of fatty acid biosynthetic process	0.0014934	0.0237772	GO:0120254	olefinic compound metabolic process	0.00193421	0.0296365									GO:1905039	carboxylic acid transmembrane transport
																				GO:1990778	protein localization to cell periphery	0.000276806	0.00441562	GO:0050767	regulation of neurogenesis	0.00274043	0.0411064					GO:1903322	positive regulation of protein modification by small protein conjugation or removal	0.00150237	0.0238597	GO:0042180	cellular ketone metabolic process	0.00193824	0.0296365									GO:0034103	regulation of tissue remodeling
																				GO:0050714	positive regulation of protein secretion	0.000279095	0.0044368	GO:0060491	regulation of cell projection assembly	0.00277927	0.0415841					GO:0051100	negative regulation of binding	0.0015319	0.0242674	GO:1901215	negative regulation of neuron death	0.00194377	0.0296366									GO:2000736	regulation of stem cell differentiation
																				GO:0043280	positive regulation of cysteine-type endopeptidase activity involved in apoptotic process	0.000279539	0.0044368	GO:0003012	muscle system process	0.00283218	0.0422692					GO:0035307	positive regulation of protein dephosphorylation	0.00155751	0.0244901	GO:0071900	regulation of protein serine/threonine kinase activity	0.00195182	0.0296366									GO:1904707	positive regulation of vascular associated smooth muscle cell proliferation
																				GO:0046394	carboxylic acid biosynthetic process	0.000284244	0.00450017	GO:0002221	pattern recognition receptor signaling pathway	0.00284371	0.0422926					GO:0006505	GPI anchor metabolic process	0.00156514	0.0244901	GO:0051224	negative regulation of protein transport	0.00195293	0.0296366									GO:0021953	central nervous system neuron differentiation
																				GO:0060828	regulation of canonical Wnt signaling pathway	0.000287477	0.00453998	GO:0044242	cellular lipid catabolic process	0.00285428	0.0422926					GO:0035335	peptidyl-tyrosine dephosphorylation	0.00156514	0.0244901	GO:0052547	regulation of peptidase activity	0.00198182	0.0298267									GO:0010893	positive regulation of steroid biosynthetic process
																				GO:0050920	regulation of chemotaxis	0.00028901	0.00455281	GO:0042752	regulation of circadian rhythm	0.00286404	0.0422926					GO:0061842	microtubule organizing center localization	0.00156514	0.0244901	GO:0006757	ATP generation from ADP	0.0020096	0.0298267									GO:0031110	regulation of microtubule polymerization or depolymerization
																				GO:0051963	regulation of synapse assembly	0.00028991	0.00455562	GO:0046824	positive regulation of nucleocytoplasmic transport	0.00286847	0.0422926					GO:0006090	pyruvate metabolic process	0.00156544	0.0244901	GO:1901361	organic cyclic compound catabolic process	0.00201639	0.0298267									GO:0006694	steroid biosynthetic process
																				GO:0019751	polyol metabolic process	0.000292685	0.00458782	GO:0002440	production of molecular mediator of immune response	0.00286935	0.0422926					GO:1902287	semaphorin-plexin signaling pathway involved in axon guidance	0.00157227	0.024536	GO:2000249	regulation of actin cytoskeleton reorganization	0.00201964	0.0298267									GO:0000303	response to superoxide
																				GO:0034764	positive regulation of transmembrane transport	0.000296534	0.00463664	GO:0051781	positive regulation of cell division	0.002938	0.0431973					GO:0072522	purine-containing compound biosynthetic process	0.0015979	0.0248742	GO:0010573	vascular endothelial growth factor production	0.00202933	0.0298267									GO:0045056	transcytosis
																				GO:0044403	biological process involved in symbiotic interaction	0.000304946	0.0047564	GO:0051651	maintenance of location in cell	0.00296422	0.0434279					GO:0043547	positive regulation of GTPase activity	0.00161097	0.0249763	GO:0033687	osteoblast proliferation	0.00202933	0.0298267									GO:0071800	podosome assembly
																				GO:0046633	alpha-beta T cell proliferation	0.000306342	0.00476074	GO:0046883	regulation of hormone secretion	0.00297561	0.0434279					GO:0031346	positive regulation of cell projection organization	0.0016124	0.0249763	GO:0006491	N-glycan processing	0.00203298	0.0298267									GO:0072529	pyrimidine-containing compound catabolic process
																				GO:0043122	regulation of I-kappaB kinase/NF-kappaB signaling	0.000306731	0.00476074	GO:0051402	neuron apoptotic process	0.00297561	0.0434279					GO:0032388	positive regulation of intracellular transport	0.00162478	0.0251062	GO:0033623	regulation of integrin activation	0.00203298	0.0298267									GO:1901984	negative regulation of protein acetylation
																				GO:1904752	regulation of vascular associated smooth muscle cell migration	0.00030982	0.00478698	GO:0046879	hormone secretion	0.00300771	0.0437888					GO:0120161	regulation of cold-induced thermogenesis	0.00164001	0.0252177	GO:0051131	chaperone-mediated protein complex assembly	0.00203298	0.0298267									GO:0010543	regulation of platelet activation
																				GO:1901184	regulation of ERBB signaling pathway	0.000309938	0.00478698	GO:0002758	innate immune response-activating signaling pathway	0.00301886	0.0438436					GO:1904019	epithelial cell apoptotic process	0.00164001	0.0252177	GO:0061318	renal filtration cell differentiation	0.00203298	0.0298267									GO:0007015	actin filament organization
																				GO:0016485	protein processing	0.000311414	0.00479805	GO:0001935	endothelial cell proliferation	0.0030771	0.0445804					GO:0022618	ribonucleoprotein complex assembly	0.00165446	0.0253779	GO:0072077	renal vesicle morphogenesis	0.00203298	0.0298267									GO:0030193	regulation of blood coagulation
																				GO:0002637	regulation of immunoglobulin production	0.00031562	0.00485102	GO:0032720	negative regulation of tumor necrosis factor production	0.0030988	0.0447856					GO:0090559	regulation of membrane permeability	0.00166556	0.025486	GO:0072112	podocyte differentiation	0.00203298	0.0298267									GO:0050994	regulation of lipid catabolic process
																				GO:0051259	protein complex oligomerization	0.000317004	0.00486047	GO:0007006	mitochondrial membrane organization	0.00311953	0.0449757					GO:0009205	purine ribonucleoside triphosphate metabolic process	0.00170143	0.0259716	GO:0072311	glomerular epithelial cell differentiation	0.00203298	0.0298267									GO:0051348	negative regulation of transferase activity
																				GO:0019724	B cell mediated immunity	0.000331441	0.00506952	GO:0002283	neutrophil activation involved in immune response	0.00314295	0.0450945					GO:0043161	proteasome-mediated ubiquitin-dependent protein catabolic process	0.00171762	0.0261553	GO:0009314	response to radiation	0.00203443	0.0298267									GO:1901293	nucleoside phosphate biosynthetic process
																				GO:0006086	acetyl-CoA biosynthetic process from pyruvate	0.000344716	0.00524716	GO:1905153	regulation of membrane invagination	0.00314295	0.0450945					GO:0060999	positive regulation of dendritic spine development	0.00174021	0.0263715	GO:0043534	blood vessel endothelial cell migration	0.00206443	0.0301745									GO:0007611	learning or memory
																				GO:0030836	positive regulation of actin filament depolymerization	0.000344716	0.00524716	GO:0002313	mature B cell differentiation involved in immune response	0.003163	0.0452729					GO:0070897	transcription preinitiation complex assembly	0.00174021	0.0263715	GO:0010763	positive regulation of fibroblast migration	0.0020731	0.0301745									GO:2000116	regulation of cysteine-type endopeptidase activity
																				GO:0071692	protein localization to extracellular region	0.000347774	0.0052722	GO:0032677	regulation of interleukin-8 production	0.00323383	0.0461753					GO:0009199	ribonucleoside triphosphate metabolic process	0.00174912	0.0264428	GO:0032352	positive regulation of hormone metabolic process	0.0020731	0.0301745									GO:1903825	organic acid transmembrane transport
																				GO:0030808	regulation of nucleotide biosynthetic process	0.000352203	0.0052722	GO:0007091	metaphase/anaphase transition of mitotic cell cycle	0.00327422	0.0463577					GO:0003281	ventricular septum development	0.00179002	0.0269473	GO:0001935	endothelial cell proliferation	0.00210012	0.0304945									GO:0048588	developmental cell growth
																				GO:0033866	nucleoside bisphosphate biosynthetic process	0.000352203	0.0052722	GO:0032413	negative regulation of ion transmembrane transporter activity	0.00328601	0.0463577					GO:0006353	DNA-templated transcription termination	0.00179106	0.0269473	GO:0030282	bone mineralization	0.00210552	0.0304998									GO:0048146	positive regulation of fibroblast proliferation
																				GO:0034030	ribonucleoside bisphosphate biosynthetic process	0.000352203	0.0052722	GO:0002639	positive regulation of immunoglobulin production	0.00328788	0.0463577					GO:0051099	positive regulation of binding	0.00180089	0.0270306	GO:0002275	myeloid cell activation involved in immune response	0.00212714	0.0307395									GO:0044270	cellular nitrogen compound catabolic process
																				GO:0034033	purine nucleoside bisphosphate biosynthetic process	0.000352203	0.0052722	GO:0032757	positive regulation of interleukin-8 production	0.00328788	0.0463577					GO:0060562	epithelial tube morphogenesis	0.00181403	0.0271454	GO:0002218	activation of innate immune response	0.00215686	0.0309802									GO:0046700	heterocycle catabolic process
																				GO:1900371	regulation of purine nucleotide biosynthetic process	0.000352203	0.0052722	GO:0061001	regulation of dendritic spine morphogenesis	0.00328788	0.0463577					GO:1901989	positive regulation of cell cycle phase transition	0.00182347	0.0271454	GO:1903828	negative regulation of protein localization	0.00215686	0.0309802									GO:0032370	positive regulation of lipid transport
																				GO:1904738	vascular associated smooth muscle cell migration	0.000352203	0.0052722	GO:0009266	response to temperature stimulus	0.00331568	0.0463577					GO:0034620	cellular response to unfolded protein	0.00182422	0.0271454	GO:1905517	macrophage migration	0.00215915	0.0309802									GO:0060415	muscle tissue morphogenesis
																				GO:0002224	toll-like receptor signaling pathway	0.000353075	0.00527276	GO:0032928	regulation of superoxide anion generation	0.00331752	0.0463577					GO:0009451	RNA modification	0.00183291	0.0271454	GO:0002460	adaptive immune response based on somatic recombination of immune receptors built from immunoglobulin superfamily domains	0.00217246	0.0310975									GO:0031023	microtubule organizing center organization
																				GO:0002705	positive regulation of leukocyte mediated immunity	0.00035795	0.00533295	GO:0009155	purine deoxyribonucleotide catabolic process	0.00334025	0.0463577					GO:0045814	negative regulation of gene expression, epigenetic	0.0018404	0.0271454	GO:0016311	dephosphorylation	0.00218004	0.0311324									GO:0060395	SMAD protein signal transduction
																				GO:0030100	regulation of endocytosis	0.000363069	0.00538221	GO:0045586	regulation of gamma-delta T cell differentiation	0.00334025	0.0463577					GO:0031507	heterochromatin formation	0.00184264	0.0271454	GO:0061005	cell differentiation involved in kidney development	0.00226938	0.032332									GO:0006835	dicarboxylic acid transport
																				GO:0032649	regulation of type II interferon production	0.000363812	0.00538221	GO:0046459	short-chain fatty acid metabolic process	0.00334025	0.0463577					GO:2001243	negative regulation of intrinsic apoptotic signaling pathway	0.00184264	0.0271454	GO:0045089	positive regulation of innate immune response	0.00227775	0.0323751									GO:0034620	cellular response to unfolded protein
																				GO:0034440	lipid oxidation	0.000363812	0.00538221	GO:0046643	regulation of gamma-delta T cell activation	0.00334025	0.0463577					GO:0010332	response to gamma radiation	0.00184707	0.0271454	GO:0043405	regulation of MAP kinase activity	0.00230227	0.032647									GO:0032967	positive regulation of collagen biosynthetic process
																				GO:0030595	leukocyte chemotaxis	0.000366593	0.00541067	GO:1901978	positive regulation of cell cycle checkpoint	0.00334025	0.0463577					GO:0036503	ERAD pathway	0.00184739	0.0271454	GO:0051048	negative regulation of secretion	0.00232238	0.0328552									GO:0009152	purine ribonucleotide biosynthetic process
																				GO:0006650	glycerophospholipid metabolic process	0.000372306	0.00548219	GO:2000516	positive regulation of CD4-positive, alpha-beta T cell activation	0.0033823	0.046532					GO:0010569	regulation of double-strand break repair via homologous recombination	0.00186234	0.0272378	GO:0046889	positive regulation of lipid biosynthetic process	0.0023623	0.0333079									GO:0000375	RNA splicing, via transesterification reactions
																				GO:0046578	regulation of Ras protein signal transduction	0.00037329	0.00548389	GO:0044270	cellular nitrogen compound catabolic process	0.00338817	0.046532					GO:0042733	embryonic digit morphogenesis	0.00186234	0.0272378	GO:0006521	regulation of cellular amino acid metabolic process	0.00238162	0.0333079									GO:0000377	RNA splicing, via transesterification reactions with bulged adenosine as nucleophile
																				GO:0002260	lymphocyte homeostasis	0.000375804	0.00550217	GO:0046700	heterocycle catabolic process	0.00338817	0.046532					GO:0006446	regulation of translational initiation	0.00191623	0.0278963	GO:0035791	platelet-derived growth factor receptor-beta signaling pathway	0.00238162	0.0333079									GO:0000398	mRNA splicing, via spliceosome
																				GO:0046467	membrane lipid biosynthetic process	0.000376276	0.00550217	GO:0002455	humoral immune response mediated by circulating immunoglobulin	0.00339981	0.046532					GO:0043407	negative regulation of MAP kinase activity	0.00191623	0.0278963	GO:0097421	liver regeneration	0.00238162	0.0333079									GO:0006695	cholesterol biosynthetic process
																				GO:0001562	response to protozoan	0.000378519	0.00552199	GO:0030520	intracellular estrogen receptor signaling pathway	0.00339981	0.046532					GO:0032535	regulation of cellular component size	0.00193967	0.0281722	GO:0048535	lymph node development	0.00238739	0.0333079									GO:0034113	heterotypic cell-cell adhesion
																				GO:0070371	ERK1 and ERK2 cascade	0.00037938	0.00552199	GO:1902743	regulation of lamellipodium organization	0.00339981	0.046532					GO:0071826	ribonucleoprotein complex subunit organization	0.00195243	0.0282289	GO:0090077	foam cell differentiation	0.00238739	0.0333079									GO:0072527	pyrimidine-containing compound metabolic process
																				GO:0002820	negative regulation of adaptive immune response	0.000384765	0.00558749	GO:1903322	positive regulation of protein modification by small protein conjugation or removal	0.00349288	0.0476959					GO:0048488	synaptic vesicle endocytosis	0.00195704	0.0282289	GO:0070374	positive regulation of ERK1 and ERK2 cascade	0.0023999	0.0334055									GO:1902653	secondary alcohol biosynthetic process
																				GO:0048545	response to steroid hormone	0.000391304	0.00566942	GO:1903556	negative regulation of tumor necrosis factor superfamily cytokine production	0.00351789	0.0479272					GO:0060260	regulation of transcription initiation by RNA polymerase II	0.00195704	0.0282289	GO:0010935	regulation of macrophage cytokine production	0.00241434	0.0334527									GO:0048015	phosphatidylinositol-mediated signaling
																				GO:0014909	smooth muscle cell migration	0.000397563	0.00574693	GO:0002822	regulation of adaptive immune response based on somatic recombination of immune receptors built from immunoglobulin superfamily domains	0.00354055	0.0480205					GO:0034067	protein localization to Golgi apparatus	0.00197044	0.0283551	GO:0042554	superoxide anion generation	0.00241434	0.0334527									GO:1901657	glycosyl compound metabolic process
																				GO:0006066	alcohol metabolic process	0.000399563	0.00576264	GO:0070585	protein localization to mitochondrion	0.00354719	0.0480205					GO:0000070	mitotic sister chromatid segregation	0.00197481	0.0283551	GO:0055021	regulation of cardiac muscle tissue growth	0.00243015	0.0335184									GO:0042542	response to hydrogen peroxide
																				GO:0046777	protein autophosphorylation	0.000415875	0.00596357	GO:0051302	regulation of cell division	0.00354899	0.0480205					GO:0016042	lipid catabolic process	0.0019795	0.0283552	GO:0060191	regulation of lipase activity	0.00243015	0.0335184									GO:0014037	Schwann cell differentiation
																				GO:0060047	heart contraction	0.000415875	0.00596357	GO:0007613	memory	0.00356967	0.0481905					GO:0045931	positive regulation of mitotic cell cycle	0.00198833	0.0283552	GO:0001892	embryonic placenta development	0.00244654	0.0336678									GO:0009914	hormone transport
																				GO:0006941	striated muscle contraction	0.000416326	0.00596357	GO:0032637	interleukin-8 production	0.00363614	0.0489766					GO:0046822	regulation of nucleocytoplasmic transport	0.00198833	0.0283552	GO:0022617	extracellular matrix disassembly	0.00247402	0.0338775									GO:0045806	negative regulation of endocytosis
																				GO:0050855	regulation of B cell receptor signaling pathway	0.000417751	0.00597043	GO:0006405	RNA export from nucleus	0.00366699	0.0492803					GO:0006378	mRNA polyadenylation	0.00202147	0.0286976	GO:1900274	regulation of phospholipase C activity	0.00247402	0.0338775									GO:0071526	semaphorin-plexin signaling pathway
																				GO:0046474	glycerophospholipid biosynthetic process	0.000422393	0.00602315									GO:2000758	positive regulation of peptidyl-lysine acetylation	0.00202147	0.0286976	GO:0061082	myeloid leukocyte cytokine production	0.00247857	0.0338775									GO:0051100	negative regulation of binding
																				GO:0060048	cardiac muscle contraction	0.000426262	0.00606463									GO:0005996	monosaccharide metabolic process	0.00202729	0.0287154	GO:0009141	nucleoside triphosphate metabolic process	0.00249436	0.0340166									GO:0060759	regulation of response to cytokine stimulus
																				GO:1903532	positive regulation of secretion by cell	0.000428052	0.00607642									GO:0045860	positive regulation of protein kinase activity	0.00203501	0.02876	GO:0002718	regulation of cytokine production involved in immune response	0.00250184	0.0340229									GO:0061326	renal tubule development
																				GO:0048524	positive regulation of viral process	0.000432342	0.00612356									GO:1990138	neuron projection extension	0.00206368	0.0290997	GO:0002821	positive regulation of adaptive immune response	0.00250606	0.0340229									GO:0016054	organic acid catabolic process
																				GO:0010692	regulation of alkaline phosphatase activity	0.000438198	0.00619261									GO:0033627	cell adhesion mediated by integrin	0.00207404	0.0291804	GO:1903532	positive regulation of secretion by cell	0.00251271	0.0340368									GO:0046395	carboxylic acid catabolic process
																				GO:0019221	cytokine-mediated signaling pathway	0.000442078	0.00623115									GO:0019217	regulation of fatty acid metabolic process	0.0021085	0.029522	GO:0061041	regulation of wound healing	0.00253199	0.0342214									GO:0050708	regulation of protein secretion
																				GO:1901653	cellular response to peptide	0.000442898	0.00623115									GO:0007229	integrin-mediated signaling pathway	0.00211241	0.029522	GO:0061448	connective tissue development	0.00255925	0.0344907									GO:2000573	positive regulation of DNA biosynthetic process
																				GO:0019217	regulation of fatty acid metabolic process	0.000445763	0.00624428									GO:0010586	miRNA metabolic process	0.00211241	0.029522	GO:0032409	regulation of transporter activity	0.002569	0.0344907									GO:0019430	removal of superoxide radicals
																				GO:0032273	positive regulation of protein polymerization	0.000445808	0.00624428									GO:0018027	peptidyl-lysine dimethylation	0.00212073	0.0295726	GO:0050769	positive regulation of neurogenesis	0.002569	0.0344907									GO:0021702	cerebellar Purkinje cell differentiation
																				GO:0043542	endothelial cell migration	0.000448277	0.00626497									GO:0043254	regulation of protein-containing complex assembly	0.0021976	0.0305768	GO:0003300	cardiac muscle hypertrophy	0.00261884	0.0349275									GO:0030730	sequestering of triglyceride
																				GO:0048260	positive regulation of receptor-mediated endocytosis	0.000458275	0.00639056									GO:0031668	cellular response to extracellular stimulus	0.0022276	0.0309257	GO:0042310	vasoconstriction	0.00261884	0.0349275									GO:0033194	response to hydroperoxide
																				GO:0006631	fatty acid metabolic process	0.000465413	0.00647581									GO:0010876	lipid localization	0.00224922	0.0311572	GO:0055013	cardiac muscle cell development	0.00261884	0.0349275									GO:0045655	regulation of monocyte differentiation
																				GO:0010634	positive regulation of epithelial cell migration	0.00048228	0.00668106									GO:0045598	regulation of fat cell differentiation	0.002278	0.0314175	GO:0070301	cellular response to hydrogen peroxide	0.00263185	0.0350163									GO:0070486	leukocyte aggregation
																				GO:0016064	immunoglobulin mediated immune response	0.00048228	0.00668106									GO:0106106	cold-induced thermogenesis	0.002278	0.0314175	GO:0030324	lung development	0.00263706	0.0350163									GO:1900221	regulation of amyloid-beta clearance
																				GO:0071375	cellular response to peptide hormone stimulus	0.000486395	0.00672333									GO:0042255	ribosome assembly	0.00229813	0.0316257	GO:0050798	activated T cell proliferation	0.0026613	0.0351838									GO:0048041	focal adhesion assembly
																				GO:0045807	positive regulation of endocytosis	0.000488442	0.00673687									GO:0009141	nucleoside triphosphate metabolic process	0.00232053	0.0318642	GO:1902895	positive regulation of miRNA transcription	0.0026613	0.0351838									GO:0048596	embryonic camera-type eye morphogenesis
																				GO:0007189	adenylate cyclase-activating G protein-coupled receptor signaling pathway	0.000492312	0.00676349									GO:0032231	regulation of actin filament bundle assembly	0.00237288	0.0323948	GO:0003323	type B pancreatic cell development	0.0026837	0.035249									GO:0048745	smooth muscle tissue development
																				GO:0046627	negative regulation of insulin receptor signaling pathway	0.000493584	0.00676349									GO:0006735	NADH regeneration	0.00239616	0.0323948	GO:0010743	regulation of macrophage derived foam cell differentiation	0.0026837	0.035249									GO:0003279	cardiac septum development
																				GO:2000249	regulation of actin cytoskeleton reorganization	0.000493584	0.00676349									GO:0051004	regulation of lipoprotein lipase activity	0.00239616	0.0323948	GO:0030325	adrenal gland development	0.0026837	0.035249									GO:0061387	regulation of extent of cell growth
																				GO:0030705	cytoskeleton-dependent intracellular transport	0.000497478	0.00678741									GO:0061621	canonical glycolysis	0.00239616	0.0323948	GO:0002720	positive regulation of cytokine production involved in immune response	0.00273813	0.03579									GO:0006611	protein export from nucleus
																				GO:0031032	actomyosin structure organization	0.000497478	0.00678741									GO:0061718	glucose catabolic process to pyruvate	0.00239616	0.0323948	GO:0043547	positive regulation of GTPase activity	0.0027442	0.03579									GO:0010656	negative regulation of muscle cell apoptotic process
																				GO:0032620	interleukin-17 production	0.000500694	0.00680189									GO:0071816	tail-anchored membrane protein insertion into ER membrane	0.00239616	0.0323948	GO:0014812	muscle cell migration	0.00274823	0.03579									GO:0007411	axon guidance
																				GO:0072583	clathrin-dependent endocytosis	0.000500694	0.00680189									GO:1902285	semaphorin-plexin signaling pathway involved in neuron projection guidance	0.00239616	0.0323948	GO:0046034	ATP metabolic process	0.00274853	0.03579									GO:0000305	response to oxygen radical
																				GO:0045580	regulation of T cell differentiation	0.000501959	0.00680446									GO:0003007	heart morphogenesis	0.00240037	0.0323948	GO:0050852	T cell receptor signaling pathway	0.00277115	0.0359534									GO:1904263	positive regulation of TORC1 signaling
																				GO:0034767	positive regulation of monoatomic ion transmembrane transport	0.000513707	0.0069488									GO:0006754	ATP biosynthetic process	0.00241499	0.0325222	GO:1901862	negative regulation of muscle tissue development	0.00277295	0.0359534									GO:2001224	positive regulation of neuron migration
																				GO:0071901	negative regulation of protein serine/threonine kinase activity	0.00051866	0.0070008									GO:0045723	positive regulation of fatty acid biosynthetic process	0.00244898	0.0328393	GO:0014033	neural crest cell differentiation	0.00278633	0.0359863									GO:0002685	regulation of leukocyte migration
																				GO:0008016	regulation of heart contraction	0.000529674	0.00712999									GO:0050860	negative regulation of T cell receptor signaling pathway	0.00244898	0.0328393	GO:0070997	neuron death	0.00279191	0.0359863									GO:0072073	kidney epithelium development
																				GO:0060560	developmental growth involved in morphogenesis	0.000530488	0.00712999									GO:0030330	DNA damage response, signal transduction by p53 class mediator	0.0024597	0.0328431	GO:0043392	negative regulation of DNA binding	0.00279332	0.0359863									GO:0001666	response to hypoxia
																				GO:0042177	negative regulation of protein catabolic process	0.00053421	0.00716477									GO:0097006	regulation of plasma lipoprotein particle levels	0.0024597	0.0328431	GO:0060350	endochondral bone morphogenesis	0.00283567	0.0364544									GO:0007098	centrosome cycle
																				GO:0044000	movement in host	0.000545819	0.00730496									GO:0046831	regulation of RNA export from nucleus	0.00248077	0.0329147	GO:0033028	myeloid cell apoptotic process	0.00286856	0.0367428									GO:0007584	response to nutrient
																				GO:0006913	nucleocytoplasmic transport	0.000548138	0.00730503									GO:0072710	response to hydroxyurea	0.00248077	0.0329147	GO:0010038	response to metal ion	0.00287025	0.0367428									GO:0030968	endoplasmic reticulum unfolded protein response
																				GO:0051169	nuclear transport	0.000548138	0.00730503									GO:0090239	regulation of histone H4 acetylation	0.00248077	0.0329147	GO:0043552	positive regulation of phosphatidylinositol 3-kinase activity	0.00296416	0.037865									GO:0046579	positive regulation of Ras protein signal transduction
																				GO:0002262	myeloid cell homeostasis	0.000551249	0.00733104									GO:0032922	circadian regulation of gene expression	0.00258238	0.0341907	GO:0002068	glandular epithelial cell development	0.00299258	0.0380674									GO:1900046	regulation of hemostasis
																				GO:0009306	protein secretion	0.000552576	0.00733324									GO:0019320	hexose catabolic process	0.0026171	0.0345776	GO:0033032	regulation of myeloid cell apoptotic process	0.00299258	0.0380674									GO:0051496	positive regulation of stress fiber assembly
																				GO:0050769	positive regulation of neurogenesis	0.000560112	0.00740316									GO:0090087	regulation of peptide transport	0.0026561	0.0350193	GO:0032412	regulation of monoatomic ion transmembrane transporter activity	0.00301353	0.0382536									GO:0097485	neuron projection guidance
																				GO:0072089	stem cell proliferation	0.000560188	0.00740316									GO:0035967	cellular response to topologically incorrect protein	0.00268488	0.0353248	GO:0034308	primary alcohol metabolic process	0.00307762	0.0389039									GO:0001938	positive regulation of endothelial cell proliferation
																				GO:0006081	cellular aldehyde metabolic process	0.0005626	0.00741951									GO:1902369	negative regulation of RNA catabolic process	0.00272711	0.0358054	GO:0072078	nephron tubule morphogenesis	0.00307762	0.0389039									GO:0006213	pyrimidine nucleoside metabolic process
																				GO:0006109	regulation of carbohydrate metabolic process	0.000570006	0.00748592									GO:0009144	purine nucleoside triphosphate metabolic process	0.00276189	0.0360413	GO:0032651	regulation of interleukin-1 beta production	0.00309502	0.0390423									GO:0031953	negative regulation of protein autophosphorylation
																				GO:0007033	vacuole organization	0.000570006	0.00748592									GO:0061028	establishment of endothelial barrier	0.00276377	0.0360413	GO:0002920	regulation of humoral immune response	0.00310604	0.0390533									GO:0051299	centrosome separation
																				GO:0010614	negative regulation of cardiac muscle hypertrophy	0.0005773	0.00756599									GO:1903321	negative regulation of protein modification by small protein conjugation or removal	0.00276509	0.0360413	GO:0090257	regulation of muscle system process	0.00310878	0.0390533									GO:0014068	positive regulation of phosphatidylinositol 3-kinase signaling
																				GO:0006942	regulation of striated muscle contraction	0.000583077	0.00761012									GO:1901990	regulation of mitotic cell cycle phase transition	0.002768	0.0360413	GO:0061180	mammary gland epithelium development	0.0031801	0.0398418									GO:0008210	estrogen metabolic process
																				GO:0050848	regulation of calcium-mediated signaling	0.000583077	0.00761012									GO:0051090	regulation of DNA-binding transcription factor activity	0.00278106	0.0361366	GO:0003007	heart morphogenesis	0.00319452	0.0398418									GO:0061384	heart trabecula morphogenesis
																				GO:0070129	regulation of mitochondrial translation	0.000584766	0.00761642									GO:0016571	histone methylation	0.00280467	0.0363681	GO:1901990	regulation of mitotic cell cycle phase transition	0.00319513	0.0398418									GO:0046718	viral entry into host cell
																				GO:0061572	actin filament bundle organization	0.000588093	0.007644									GO:0006836	neurotransmitter transport	0.0028734	0.0371828	GO:0030323	respiratory tube development	0.00320603	0.0398418									GO:0007160	cell-matrix adhesion
																				GO:0035592	establishment of protein localization to extracellular region	0.000591856	0.00767712									GO:0001667	ameboidal-type cell migration	0.00290317	0.0373405	GO:0060711	labyrinthine layer development	0.00321761	0.0398418									GO:0048754	branching morphogenesis of an epithelial tube
																				GO:0035306	positive regulation of dephosphorylation	0.000594672	0.00769783									GO:0042273	ribosomal large subunit biogenesis	0.0029034	0.0373405	GO:0070527	platelet aggregation	0.00321761	0.0398418									GO:0085029	extracellular matrix assembly
																				GO:0043434	response to peptide hormone	0.000608593	0.00786192									GO:0060261	positive regulation of transcription initiation by RNA polymerase II	0.0029034	0.0373405	GO:1903409	reactive oxygen species biosynthetic process	0.00321761	0.0398418									GO:2000249	regulation of actin cytoskeleton reorganization
																				GO:0019395	fatty acid oxidation	0.000616827	0.00793849									GO:0009185	ribonucleoside diphosphate metabolic process	0.00296337	0.0380339	GO:0000768	syncytium formation by plasma membrane fusion	0.00323367	0.0398776									GO:1902850	microtubule cytoskeleton organization involved in mitosis
																				GO:0010936	negative regulation of macrophage cytokine production	0.000617033	0.00793849									GO:1903115	regulation of actin filament-based movement	0.00298674	0.0382296	GO:0140253	cell-cell fusion	0.00323367	0.0398776									GO:0050764	regulation of phagocytosis
																				GO:0042119	neutrophil activation	0.000619395	0.00794642									GO:0003205	cardiac chamber development	0.00299094	0.0382296	GO:0022612	gland morphogenesis	0.00324755	0.0399672									GO:0009165	nucleotide biosynthetic process
																				GO:0010823	negative regulation of mitochondrion organization	0.000620166	0.00794642									GO:0007178	transmembrane receptor protein serine/threonine kinase signaling pathway	0.00299685	0.0382296	GO:0022404	molting cycle process	0.00326922	0.0400711									GO:0071692	protein localization to extracellular region
																				GO:0050764	regulation of phagocytosis	0.000627479	0.00802203									GO:0061614	miRNA transcription	0.00302162	0.0383537	GO:0022405	hair cycle process	0.00326922	0.0400711									GO:0048017	inositol lipid-mediated signaling
																				GO:0050728	negative regulation of inflammatory response	0.000628606	0.00802203									GO:0008286	insulin receptor signaling pathway	0.00302901	0.0383537	GO:0002695	negative regulation of leukocyte activation	0.00330345	0.0404089									GO:0030516	regulation of axon extension
																				GO:0051283	negative regulation of sequestering of calcium ion	0.000634139	0.00807633									GO:0031532	actin cytoskeleton reorganization	0.00303098	0.0383537	GO:0009100	glycoprotein metabolic process	0.00332539	0.0404692									GO:0048661	positive regulation of smooth muscle cell proliferation
																				GO:0043647	inositol phosphate metabolic process	0.0006357	0.00807749									GO:0045446	endothelial cell differentiation	0.00303098	0.0383537	GO:0046879	hormone secretion	0.00335189	0.0404692									GO:1901361	organic cyclic compound catabolic process
																				GO:0060996	dendritic spine development	0.000637203	0.00807749									GO:0007033	vacuole organization	0.00310091	0.0390062	GO:0051896	regulation of protein kinase B signaling	0.00337201	0.0404692									GO:0007249	I-kappaB kinase/NF-kappaB signaling
																				GO:0055117	regulation of cardiac muscle contraction	0.000638067	0.00807749									GO:0010921	regulation of phosphatase activity	0.00310115	0.0390062	GO:0051924	regulation of calcium ion transport	0.00338473	0.0404692									GO:0051236	establishment of RNA localization
																				GO:0046931	pore complex assembly	0.000648324	0.00819092									GO:0140238	presynaptic endocytosis	0.00310115	0.0390062	GO:0030501	positive regulation of bone mineralization	0.00338845	0.0404692									GO:0071466	cellular response to xenobiotic stimulus
																				GO:1900542	regulation of purine nucleotide metabolic process	0.000651869	0.00821928									GO:2000142	regulation of DNA-templated transcription initiation	0.00314718	0.0393937	GO:0055023	positive regulation of cardiac muscle tissue growth	0.00338845	0.0404692									GO:0051251	positive regulation of lymphocyte activation
																				GO:0033631	cell-cell adhesion mediated by integrin	0.000671976	0.00843722									GO:2000781	positive regulation of double-strand break repair	0.00314718	0.0393937	GO:0019216	regulation of lipid metabolic process	0.00339356	0.0404692									GO:0008361	regulation of cell size
																				GO:1901881	positive regulation of protein depolymerization	0.000671976	0.00843722									GO:0008589	regulation of smoothened signaling pathway	0.00315793	0.0393937	GO:0071706	tumor necrosis factor superfamily cytokine production	0.00342041	0.0404692									GO:0010833	telomere maintenance via telomere lengthening
																				GO:0060070	canonical Wnt signaling pathway	0.000673161	0.00843722									GO:0006937	regulation of muscle contraction	0.00316272	0.0393937	GO:0030449	regulation of complement activation	0.00342332	0.0404692									GO:0048384	retinoic acid receptor signaling pathway
																				GO:0071354	cellular response to interleukin-6	0.000698804	0.00869399									GO:0006605	protein targeting	0.00317818	0.0393937	GO:0032042	mitochondrial DNA metabolic process	0.00342332	0.0404692									GO:0034655	nucleobase-containing compound catabolic process
																				GO:0072539	T-helper 17 cell differentiation	0.000698804	0.00869399									GO:0009126	purine nucleoside monophosphate metabolic process	0.00318206	0.0393937	GO:0045684	positive regulation of epidermis development	0.00342332	0.0404692									GO:0071559	response to transforming growth factor beta
																				GO:1901185	negative regulation of ERBB signaling pathway	0.000698804	0.00869399									GO:0043631	RNA polyadenylation	0.00318206	0.0393937	GO:0070168	negative regulation of biomineral tissue development	0.00342332	0.0404692									GO:0032368	regulation of lipid transport
																				GO:0051701	biological process involved in interaction with host	0.000699152	0.00869399									GO:1904707	positive regulation of vascular associated smooth muscle cell proliferation	0.00318206	0.0393937	GO:1903975	regulation of glial cell migration	0.00342332	0.0404692									GO:0033673	negative regulation of kinase activity
																				GO:0006635	fatty acid beta-oxidation	0.00070511	0.00875084									GO:0006487	protein N-linked glycosylation	0.00325289	0.0401914	GO:0032147	activation of protein kinase activity	0.00343151	0.0404692									GO:0022408	negative regulation of cell-cell adhesion
																				GO:0002444	myeloid leukocyte mediated immunity	0.000710412	0.00879935									GO:0060485	mesenchyme development	0.00328	0.0404269	GO:0070664	negative regulation of leukocyte proliferation	0.00343151	0.0404692									GO:0009306	protein secretion
																				GO:0002573	myeloid leukocyte differentiation	0.000728151	0.00900143									GO:0031639	plasminogen activation	0.00328481	0.0404269	GO:0019229	regulation of vasoconstriction	0.00345096	0.0404692									GO:0031331	positive regulation of cellular catabolic process
																				GO:0046486	glycerolipid metabolic process	0.000731872	0.00900493									GO:0043516	regulation of DNA damage response, signal transduction by p53 class mediator	0.00332409	0.0408114	GO:0016558	protein import into peroxisome matrix	0.00346359	0.0404692									GO:0032231	regulation of actin filament bundle assembly
																				GO:0044091	membrane biogenesis	0.000732162	0.00900493									GO:0015804	neutral amino acid transport	0.00334583	0.0408114	GO:0034116	positive regulation of heterotypic cell-cell adhesion	0.00346359	0.0404692									GO:0010718	positive regulation of epithelial to mesenchymal transition
																				GO:0060348	bone development	0.00073271	0.00900493									GO:0043666	regulation of phosphoprotein phosphatase activity	0.00334583	0.0408114	GO:0034309	primary alcohol biosynthetic process	0.00346359	0.0404692									GO:0002827	positive regulation of T-helper 1 type immune response
																				GO:0010970	transport along microtubule	0.000734926	0.00901462									GO:0048762	mesenchymal cell differentiation	0.00335361	0.0408114	GO:0043144	sno(s)RNA processing	0.00346359	0.0404692									GO:0003184	pulmonary valve morphogenesis
																				GO:0002312	B cell activation involved in immune response	0.000760313	0.00928994									GO:0007059	chromosome segregation	0.00335498	0.0408114	GO:0046886	positive regulation of hormone biosynthetic process	0.00346359	0.0404692									GO:1905664	regulation of calcium ion import across plasma membrane
																				GO:0006140	regulation of nucleotide metabolic process	0.000760313	0.00928994									GO:0019221	cytokine-mediated signaling pathway	0.00335498	0.0408114	GO:0071340	skeletal muscle acetylcholine-gated channel clustering	0.00346359	0.0404692									GO:0035855	megakaryocyte development
																				GO:0050680	negative regulation of epithelial cell proliferation	0.000770388	0.00938357									GO:0050858	negative regulation of antigen receptor-mediated signaling pathway	0.00337566	0.0409836	GO:0072224	metanephric glomerulus development	0.00346359	0.0404692									GO:1903306	negative regulation of regulated secretory pathway
																				GO:1900078	positive regulation of cellular response to insulin stimulus	0.000770947	0.00938357									GO:0071214	cellular response to abiotic stimulus	0.00339057	0.0410064	GO:0071692	protein localization to extracellular region	0.00346879	0.0404692									GO:0046320	regulation of fatty acid oxidation
																				GO:0010565	regulation of cellular ketone metabolic process	0.000785853	0.00952828									GO:0104004	cellular response to environmental stimulus	0.00339057	0.0410064	GO:0009615	response to virus	0.00350012	0.0407562									GO:0048147	negative regulation of fibroblast proliferation
																				GO:0070646	protein modification by small protein removal	0.000785853	0.00952828									GO:0060425	lung morphogenesis	0.00341153	0.0411806	GO:0051092	positive regulation of NF-kappaB transcription factor activity	0.00352141	0.0409254									GO:0090224	regulation of spindle organization
																				GO:0043409	negative regulation of MAPK cascade	0.000796741	0.00964178									GO:0032868	response to insulin	0.0034795	0.0419031	GO:0043087	regulation of GTPase activity	0.00352818	0.0409255									GO:0001894	tissue homeostasis
																				GO:0010464	regulation of mesenchymal cell proliferation	0.000806979	0.00972514									GO:2001236	regulation of extrinsic apoptotic signaling pathway	0.00348471	0.0419031	GO:0071902	positive regulation of protein serine/threonine kinase activity	0.00354267	0.0410151									GO:0060249	anatomical structure homeostasis
																				GO:0035850	epithelial cell differentiation involved in kidney development	0.000806979	0.00972514									GO:0099159	regulation of modification of postsynaptic structure	0.00351599	0.0421813	GO:0051482	positive regulation of cytosolic calcium ion concentration involved in phospholipase C-activating G protein-coupled signaling pathway	0.00359318	0.0415071									GO:0035592	establishment of protein localization to extracellular region
																				GO:0042147	retrograde transport, endosome to Golgi	0.000812152	0.00972514									GO:2000144	positive regulation of DNA-templated transcription initiation	0.00352126	0.0421813	GO:0042531	positive regulation of tyrosine phosphorylation of STAT protein	0.00360854	0.0415071									GO:0050818	regulation of coagulation
																				GO:0051881	regulation of mitochondrial membrane potential	0.000812152	0.00972514									GO:0030323	respiratory tube development	0.00355362	0.042488	GO:2000378	negative regulation of reactive oxygen species metabolic process	0.00360854	0.0415071									GO:0014706	striated muscle tissue development
																				GO:0010876	lipid localization	0.000812292	0.00972514									GO:0006006	glucose metabolic process	0.00358723	0.0427444	GO:0043406	positive regulation of MAP kinase activity	0.00361259	0.0415071									GO:0010717	regulation of epithelial to mesenchymal transition
																				GO:0032660	regulation of interleukin-17 production	0.000814405	0.00972514									GO:1901983	regulation of protein acetylation	0.00358865	0.0427444	GO:0002886	regulation of myeloid leukocyte mediated immunity	0.00367592	0.0418465									GO:0051492	regulation of stress fiber assembly
																				GO:0036230	granulocyte activation	0.000814405	0.00972514									GO:2000628	regulation of miRNA metabolic process	0.00361996	0.0429329	GO:0008347	glial cell migration	0.00367592	0.0418465									GO:0034440	lipid oxidation
																				GO:0030177	positive regulation of Wnt signaling pathway	0.000819042	0.00976206									GO:0006029	proteoglycan metabolic process	0.00362089	0.0429329	GO:0043113	receptor clustering	0.00367592	0.0418465									GO:1903707	negative regulation of hemopoiesis
																				GO:0097107	postsynaptic density assembly	0.000828184	0.00985242									GO:0000075	cell cycle checkpoint signaling	0.00362496	0.0429329	GO:0042326	negative regulation of phosphorylation	0.0036908	0.0418465									GO:0008654	phospholipid biosynthetic process
																				GO:0051604	protein maturation	0.000832512	0.0098853									GO:1903034	regulation of response to wounding	0.00365412	0.0431969	GO:1901214	regulation of neuron death	0.0036908	0.0418465									GO:0097581	lamellipodium organization
																				GO:0016054	organic acid catabolic process	0.00083936	0.00992929									GO:0045216	cell-cell junction organization	0.00367946	0.0434148	GO:0010171	body morphogenesis	0.0036925	0.0418465									GO:0044403	biological process involved in symbiotic interaction
																				GO:0046395	carboxylic acid catabolic process	0.00083936	0.00992929									GO:0019318	hexose metabolic process	0.00369154	0.0434758	GO:0046622	positive regulation of organ growth	0.0036925	0.0418465									GO:0090150	establishment of protein localization to membrane
																				GO:0051017	actin filament bundle assembly	0.000841864	0.00994029									GO:0018026	peptidyl-lysine monomethylation	0.00380957	0.0445323	GO:0060099	regulation of phagocytosis, engulfment	0.00369742	0.0418465									GO:0016042	lipid catabolic process
																				GO:0034620	cellular response to unfolded protein	0.000852306	0.0100448									GO:0033523	histone H2B ubiquitination	0.00380957	0.0445323	GO:1902105	regulation of leukocyte differentiation	0.00371486	0.0419654									GO:1903039	positive regulation of leukocyte cell-cell adhesion
																				GO:0048705	skeletal system morphogenesis	0.000873943	0.0102806									GO:0045050	protein insertion into ER membrane by stop-transfer membrane-anchor sequence	0.00380957	0.0445323	GO:0043393	regulation of protein binding	0.00373876	0.0420784									GO:0006164	purine nucleotide biosynthetic process
																				GO:0099173	postsynapse organization	0.000878391	0.0103137									GO:1903297	regulation of hypoxia-induced intrinsic apoptotic signaling pathway	0.00380957	0.0445323	GO:0048469	cell maturation	0.00373876	0.0420784									GO:0031669	cellular response to nutrient levels
																				GO:1902893	regulation of miRNA transcription	0.000923071	0.0108183									GO:0097191	extrinsic apoptotic signaling pathway	0.00384371	0.0448481	GO:0043434	response to peptide hormone	0.00378843	0.0425583									GO:0043161	proteasome-mediated ubiquitin-dependent protein catabolic process
																				GO:0043372	positive regulation of CD4-positive, alpha-beta T cell differentiation	0.000948801	0.0110992									GO:0009120	deoxyribonucleoside metabolic process	0.00390083	0.0452626	GO:0050766	positive regulation of phagocytosis	0.00386062	0.043289									GO:0019217	regulation of fatty acid metabolic process
																				GO:0065002	intracellular protein transmembrane transport	0.000952848	0.0111049									GO:0010457	centriole-centriole cohesion	0.00390083	0.0452626	GO:0014897	striated muscle hypertrophy	0.00388917	0.0435285									GO:0043547	positive regulation of GTPase activity
																				GO:0034109	homotypic cell-cell adhesion	0.000953324	0.0111049									GO:1905668	positive regulation of protein localization to endosome	0.00390083	0.0452626	GO:0050767	regulation of neurogenesis	0.0039204	0.0437971									GO:0032233	positive regulation of actin filament bundle assembly
																				GO:0007188	adenylate cyclase-modulating G protein-coupled receptor signaling pathway	0.00095573	0.0111049									GO:0010948	negative regulation of cell cycle process	0.00397546	0.0460376	GO:0008637	apoptotic mitochondrial changes	0.00393649	0.0438959									GO:0061082	myeloid leukocyte cytokine production
																				GO:0198738	cell-cell signaling by wnt	0.000956319	0.0111049									GO:1901988	negative regulation of cell cycle phase transition	0.00398226	0.0460376	GO:0006694	steroid biosynthetic process	0.00402963	0.0448519									GO:0097006	regulation of plasma lipoprotein particle levels
																				GO:0016197	endosomal transport	0.000961525	0.0111449									GO:0009161	ribonucleoside monophosphate metabolic process	0.0040242	0.046352	GO:0140056	organelle localization by membrane tethering	0.00403724	0.0448541									GO:0060412	ventricular septum morphogenesis
																				GO:0009914	hormone transport	0.000968098	0.0112005									GO:2000059	negative regulation of ubiquitin-dependent protein catabolic process	0.0040242	0.046352	GO:0009306	protein secretion	0.00404691	0.0448792									GO:0033108	mitochondrial respiratory chain complex assembly
																				GO:0050817	coagulation	0.000983948	0.0113631									GO:0006635	fatty acid beta-oxidation	0.0040874	0.0468394	GO:0050714	positive regulation of protein secretion	0.0040841	0.0451263									GO:0050996	positive regulation of lipid catabolic process
																				GO:1904861	excitatory synapse assembly	0.00101596	0.0117113									GO:0043968	histone H2A acetylation	0.0040963	0.0468394	GO:1903555	regulation of tumor necrosis factor superfamily cytokine production	0.0040841	0.0451263
																				GO:0090630	activation of GTPase activity	0.00102493	0.0117932									GO:0045048	protein insertion into ER membrane	0.0040963	0.0468394	GO:0010565	regulation of cellular ketone metabolic process	0.00412747	0.0454397
																				GO:0051928	positive regulation of calcium ion transport	0.00102872	0.0118153									GO:1905244	regulation of modification of synaptic structure	0.0040963	0.0468394	GO:0045667	regulation of osteoblast differentiation	0.00412747	0.0454397
																				GO:1903115	regulation of actin filament-based movement	0.00103159	0.0118267									GO:0033209	tumor necrosis factor-mediated signaling pathway	0.00413811	0.0471454	GO:0001960	negative regulation of cytokine-mediated signaling pathway	0.0041659	0.0457796
																				GO:0043383	negative T cell selection	0.0010357	0.0118297									GO:0070373	negative regulation of ERK1 and ERK2 cascade	0.00413811	0.0471454	GO:0048701	embryonic cranial skeleton morphogenesis	0.00417398	0.0457852
																				GO:0032570	response to progesterone	0.00103746	0.0118297									GO:0022604	regulation of cell morphogenesis	0.00414556	0.0471454	GO:0035296	regulation of tube diameter	0.00421986	0.0461214
																				GO:1904889	regulation of excitatory synapse assembly	0.00103746	0.0118297									GO:0006403	RNA localization	0.00421294	0.0478253	GO:0097746	blood vessel diameter maintenance	0.00421986	0.0461214
																				GO:0010803	regulation of tumor necrosis factor-mediated signaling pathway	0.00104	0.0118373									GO:0001503	ossification	0.00424946	0.0481529	GO:0035592	establishment of protein localization to extracellular region	0.0042343	0.0461958
																				GO:0030833	regulation of actin filament polymerization	0.001045	0.0118728									GO:0099175	regulation of postsynapse organization	0.00432272	0.0487191	GO:0019439	aromatic compound catabolic process	0.00426272	0.0462756
																				GO:0001666	response to hypoxia	0.00104969	0.0119046									GO:0051642	centrosome localization	0.00432734	0.0487191	GO:0006636	unsaturated fatty acid biosynthetic process	0.00428433	0.0462756
																				GO:0097529	myeloid leukocyte migration	0.00105301	0.0119209									GO:0090314	positive regulation of protein targeting to membrane	0.00432946	0.0487191	GO:0033238	regulation of amine metabolic process	0.00428433	0.0462756
																				GO:0032729	positive regulation of type II interferon production	0.00106355	0.0120186									GO:0000302	response to reactive oxygen species	0.00433041	0.0487191	GO:0071604	transforming growth factor beta production	0.00428433	0.0462756
																				GO:1903008	organelle disassembly	0.00107074	0.0120784									GO:0090276	regulation of peptide hormone secretion	0.00435199	0.0488744	GO:1903670	regulation of sprouting angiogenesis	0.00428433	0.0462756
																				GO:0045620	negative regulation of lymphocyte differentiation	0.0010899	0.0122725									GO:0098876	vesicle-mediated transport to the plasma membrane	0.00440192	0.0493136	GO:0014032	neural crest cell development	0.00430917	0.0462756
																				GO:0051926	negative regulation of calcium ion transport	0.00110241	0.0123914									GO:0008630	intrinsic apoptotic signaling pathway in response to DNA damage	0.00442536	0.0493136	GO:0051384	response to glucocorticoid	0.00430917	0.0462756
																				GO:0043271	negative regulation of monoatomic ion transport	0.00113169	0.0126978									GO:0043473	pigmentation	0.00442536	0.0493136	GO:0034440	lipid oxidation	0.00431022	0.0462756
																				GO:0019068	virion assembly	0.00114898	0.0128235									GO:0010837	regulation of keratinocyte proliferation	0.0044303	0.0493136	GO:0150063	visual system development	0.0043104	0.0462756
																				GO:0042059	negative regulation of epidermal growth factor receptor signaling pathway	0.00114898	0.0128235									GO:0042789	mRNA transcription by RNA polymerase II	0.0044303	0.0493136	GO:0031334	positive regulation of protein-containing complex assembly	0.00435	0.0466181
																				GO:0070584	mitochondrion morphogenesis	0.00114898	0.0128235									GO:0043244	regulation of protein-containing complex disassembly	0.00449126	0.0499038	GO:0015980	energy derivation by oxidation of organic compounds	0.00436836	0.0467322
																				GO:1903034	regulation of response to wounding	0.00116475	0.0129636													GO:0008544	epidermis development	0.0043817	0.0467563
																				GO:1901605	alpha-amino acid metabolic process	0.00116564	0.0129636													GO:0002221	pattern recognition receptor signaling pathway	0.00438606	0.0467563
																				GO:0006979	response to oxidative stress	0.00117391	0.0130326													GO:0009225	nucleotide-sugar metabolic process	0.00443795	0.0468967
																				GO:0014743	regulation of muscle hypertrophy	0.00118285	0.0130839													GO:0044273	sulfur compound catabolic process	0.00443795	0.0468967
																				GO:0031343	positive regulation of cell killing	0.00118474	0.0130839													GO:0044319	wound healing, spreading of cells	0.00443795	0.0468967
																				GO:0043502	regulation of muscle adaptation	0.00118474	0.0130839													GO:0090505	epiboly involved in wound healing	0.00443795	0.0468967
																				GO:1904427	positive regulation of calcium ion transmembrane transport	0.00120466	0.0132807													GO:1903205	regulation of hydrogen peroxide-induced cell death	0.00443795	0.0468967
																				GO:1902414	protein localization to cell junction	0.00120835	0.0132832													GO:0051149	positive regulation of muscle cell differentiation	0.00453125	0.0477991
																				GO:0072594	establishment of protein localization to organelle	0.00120909	0.0132832													GO:0035150	regulation of tube size	0.00453941	0.047802
																				GO:0032231	regulation of actin filament bundle assembly	0.00121602	0.0133001													GO:0071887	leukocyte apoptotic process	0.00456079	0.0479437
																				GO:0034766	negative regulation of monoatomic ion transmembrane transport	0.00121602	0.0133001													GO:0055123	digestive system development	0.0046394	0.0485396
																				GO:0051209	release of sequestered calcium ion into cytosol	0.00121695	0.0133001													GO:0010762	regulation of fibroblast migration	0.00465121	0.0485396
																				GO:0043370	regulation of CD4-positive, alpha-beta T cell differentiation	0.00123996	0.0135282													GO:0050856	regulation of T cell receptor signaling pathway	0.00465121	0.0485396
																				GO:0048588	developmental cell growth	0.00124309	0.013539													GO:0014896	muscle hypertrophy	0.00469378	0.0485396
																				GO:0051651	maintenance of location in cell	0.00125927	0.0136916													GO:1902893	regulation of miRNA transcription	0.00470724	0.0485396
																				GO:2001056	positive regulation of cysteine-type endopeptidase activity	0.00126651	0.0137009													GO:0046620	regulation of organ growth	0.00471277	0.0485396
																				GO:0002053	positive regulation of mesenchymal cell proliferation	0.00126829	0.0137009													GO:0006816	calcium ion transport	0.00474725	0.0485396
																				GO:0070741	response to interleukin-6	0.00126829	0.0137009													GO:0051216	cartilage development	0.00475312	0.0485396
																				GO:0006898	receptor-mediated endocytosis	0.00127097	0.0137009													GO:0099111	microtubule-based transport	0.00475312	0.0485396
																				GO:0043270	positive regulation of monoatomic ion transport	0.00127097	0.0137009													GO:0034109	homotypic cell-cell adhesion	0.00479923	0.0485396
																				GO:0043523	regulation of neuron apoptotic process	0.00127735	0.0137462													GO:0007131	reciprocal meiotic recombination	0.00480772	0.0485396
																				GO:0006887	exocytosis	0.00129158	0.0138757													GO:0010677	negative regulation of cellular carbohydrate metabolic process	0.00480772	0.0485396
																				GO:0048010	vascular endothelial growth factor receptor signaling pathway	0.00129538	0.0138929													GO:0070169	positive regulation of biomineral tissue development	0.00480772	0.0485396
																				GO:0019915	lipid storage	0.0013	0.0138953													GO:0140527	reciprocal homologous recombination	0.00480772	0.0485396
																				GO:0048708	astrocyte differentiation	0.0013	0.0138953													GO:0016064	immunoglobulin mediated immune response	0.00481824	0.0485396
																				GO:0016055	Wnt signaling pathway	0.00130619	0.0139379													GO:0002283	neutrophil activation involved in immune response	0.0048321	0.0485396
																				GO:0061614	miRNA transcription	0.00131066	0.013962													GO:0019886	antigen processing and presentation of exogenous peptide antigen via MHC class II	0.0048321	0.0485396
																				GO:0001773	myeloid dendritic cell activation	0.0013223	0.0140274													GO:0090050	positive regulation of cell migration involved in sprouting angiogenesis	0.0048321	0.0485396
																				GO:0010821	regulation of mitochondrion organization	0.00132347	0.0140274													GO:0090594	inflammatory response to wounding	0.0048321	0.0485396
																				GO:0034614	cellular response to reactive oxygen species	0.00132347	0.0140274													GO:1905153	regulation of membrane invagination	0.0048321	0.0485396
																				GO:0051154	negative regulation of striated muscle cell differentiation	0.00132664	0.0140375													GO:0007018	microtubule-based movement	0.00484177	0.0485396
																				GO:1901222	regulation of NIK/NF-kappaB signaling	0.00133864	0.0141408													GO:0002758	innate immune response-activating signaling pathway	0.00484951	0.0485396
																				GO:0033630	positive regulation of cell adhesion mediated by integrin	0.00135829	0.0143006													GO:0008016	regulation of heart contraction	0.00484951	0.0485396
																				GO:0097398	cellular response to interleukin-17	0.00135829	0.0143006													GO:0033690	positive regulation of osteoblast proliferation	0.00485797	0.0485396
																				GO:0030323	respiratory tube development	0.00137512	0.0144537													GO:0035733	hepatic stellate cell activation	0.00485797	0.0485396
																				GO:0072330	monocarboxylic acid biosynthetic process	0.00137926	0.0144731													GO:0045916	negative regulation of complement activation	0.00485797	0.0485396
																				GO:0007596	blood coagulation	0.00138662	0.0145181													GO:0072283	metanephric renal vesicle morphogenesis	0.00485797	0.0485396
																				GO:0032602	chemokine production	0.00138815	0.0145181													GO:0086014	atrial cardiac muscle cell action potential	0.00485797	0.0485396
																				GO:0048638	regulation of developmental growth	0.00142154	0.0148428													GO:0086026	atrial cardiac muscle cell to AV node cell signaling	0.00485797	0.0485396
																				GO:2000630	positive regulation of miRNA metabolic process	0.00142576	0.0148622													GO:0086066	atrial cardiac muscle cell to AV node cell communication	0.00485797	0.0485396
																				GO:0008088	axo-dendritic transport	0.00146014	0.0151955													GO:0070588	calcium ion transmembrane transport	0.00488125	0.0486918
																				GO:0016042	lipid catabolic process	0.00147352	0.0153096													GO:0048771	tissue remodeling	0.00496996	0.0494259
																				GO:0006643	membrane lipid metabolic process	0.0014772	0.0153227													GO:0048864	stem cell development	0.00498249	0.0494259
																				GO:0034599	cellular response to oxidative stress	0.00149634	0.0154958													GO:0070252	actin-mediated cell contraction	0.00498249	0.0494259
																				GO:0045927	positive regulation of growth	0.00150693	0.0155798													GO:0009144	purine nucleoside triphosphate metabolic process	0.00498749	0.0494259
																				GO:0071709	membrane assembly	0.00152648	0.0157562													GO:0002703	regulation of leukocyte mediated immunity	0.00500724	0.0495406
																				GO:0051260	protein homooligomerization	0.00153409	0.0158089													GO:0045823	positive regulation of heart contraction	0.00507486	0.0499465
																				GO:0009083	branched-chain amino acid catabolic process	0.00154586	0.015859													GO:0061081	positive regulation of myeloid leukocyte cytokine production involved in immune response	0.00507486	0.0499465
																				GO:0030150	protein import into mitochondrial matrix	0.00154586	0.015859													GO:1904707	positive regulation of vascular associated smooth muscle cell proliferation	0.00507486	0.0499465
																				GO:0030148	sphingolipid biosynthetic process	0.00154648	0.015859													GO:0008202	steroid metabolic process	0.00508127	0.0499465
																				GO:0046639	negative regulation of alpha-beta T cell differentiation	0.00156434	0.0160161
																				GO:0010976	positive regulation of neuron projection development	0.00157469	0.0160595
																				GO:0010595	positive regulation of endothelial cell migration	0.00158129	0.0160595
																				GO:0033865	nucleoside bisphosphate metabolic process	0.00158129	0.0160595
																				GO:0033875	ribonucleoside bisphosphate metabolic process	0.00158129	0.0160595
																				GO:0034032	purine nucleoside bisphosphate metabolic process	0.00158129	0.0160595
																				GO:0014911	positive regulation of smooth muscle cell migration	0.00158602	0.0160817
																				GO:0002701	negative regulation of production of molecular mediator of immune response	0.00161325	0.0162535
																				GO:0030890	positive regulation of B cell proliferation	0.00161325	0.0162535
																				GO:0099068	postsynapse assembly	0.00161325	0.0162535
																				GO:1900077	negative regulation of cellular response to insulin stimulus	0.00161325	0.0162535
																				GO:0010832	negative regulation of myotube differentiation	0.00164872	0.0165317
																				GO:0032048	cardiolipin metabolic process	0.00164872	0.0165317
																				GO:0032604	granulocyte macrophage colony-stimulating factor production	0.00164872	0.0165317
																				GO:0035335	peptidyl-tyrosine dephosphorylation	0.00167104	0.0167255
																				GO:0035307	positive regulation of protein dephosphorylation	0.00167599	0.0167255
																				GO:0097106	postsynaptic density organization	0.00167599	0.0167255
																				GO:0042832	defense response to protozoan	0.00170113	0.016853
																				GO:0050766	positive regulation of phagocytosis	0.00170171	0.016853
																				GO:0072384	organelle transport along microtubule	0.00170171	0.016853
																				GO:2000628	regulation of miRNA metabolic process	0.00170171	0.016853
																				GO:0010811	positive regulation of cell-substrate adhesion	0.00170211	0.016853
																				GO:0001952	regulation of cell-matrix adhesion	0.00176391	0.0174103
																				GO:0006090	pyruvate metabolic process	0.00176391	0.0174103
																				GO:0007409	axonogenesis	0.00177167	0.0174596
																				GO:0035418	protein localization to synapse	0.00178131	0.0175274
																				GO:0051153	regulation of striated muscle cell differentiation	0.00179917	0.0176738
																				GO:0090276	regulation of peptide hormone secretion	0.00180179	0.0176738
																				GO:0018209	peptidyl-serine modification	0.00182371	0.017827
																				GO:1904064	positive regulation of cation transmembrane transport	0.00182603	0.017827
																				GO:0006626	protein targeting to mitochondrion	0.0018287	0.017827
																				GO:0010611	regulation of cardiac muscle hypertrophy	0.0018287	0.017827
																				GO:0010883	regulation of lipid storage	0.00186635	0.0181354
																				GO:0007599	hemostasis	0.00187042	0.0181354
																				GO:0032388	positive regulation of intracellular transport	0.00187042	0.0181354
																				GO:0030324	lung development	0.00187182	0.0181354
																				GO:0034504	protein localization to nucleus	0.00187704	0.0181582
																				GO:2001169	regulation of ATP biosynthetic process	0.0018953	0.018305
																				GO:0060760	positive regulation of response to cytokine stimulus	0.00189802	0.018305
																				GO:0060326	cell chemotaxis	0.00191881	0.0184773
																				GO:0030258	lipid modification	0.00198927	0.0191083
																				GO:0033628	regulation of cell adhesion mediated by integrin	0.00199341	0.0191083
																				GO:0045214	sarcomere organization	0.00199341	0.0191083
																				GO:0040013	negative regulation of locomotion	0.00199864	0.0191294
																				GO:1901215	negative regulation of neuron death	0.00200524	0.0191636
																				GO:0010675	regulation of cellular carbohydrate metabolic process	0.00202083	0.0192834
																				GO:0002237	response to molecule of bacterial origin	0.00207579	0.0197676
																				GO:0001974	blood vessel remodeling	0.00208203	0.0197676
																				GO:0032480	negative regulation of type I interferon production	0.00209348	0.0197676
																				GO:0046641	positive regulation of alpha-beta T cell proliferation	0.00209348	0.0197676
																				GO:0060907	positive regulation of macrophage cytokine production	0.00209348	0.0197676
																				GO:0090200	positive regulation of release of cytochrome c from mitochondria	0.00209348	0.0197676
																				GO:0140374	antiviral innate immune response	0.00209348	0.0197676
																				GO:0010830	regulation of myotube differentiation	0.00209805	0.0197812
																				GO:0042886	amide transport	0.00211499	0.0199111
																				GO:0030072	peptide hormone secretion	0.00213524	0.0200421
																				GO:0030111	regulation of Wnt signaling pathway	0.00213524	0.0200421
																				GO:0055001	muscle cell development	0.00214293	0.0200844
																				GO:0007568	aging	0.00214665	0.0200895
																				GO:0051647	nucleus localization	0.00216472	0.0201213
																				GO:0070372	regulation of ERK1 and ERK2 cascade	0.00216603	0.0201213
																				GO:0050796	regulation of insulin secretion	0.0021684	0.0201213
																				GO:0002092	positive regulation of receptor internalization	0.00217234	0.0201213
																				GO:0010043	response to zinc ion	0.00217234	0.0201213
																				GO:2000272	negative regulation of signaling receptor activity	0.00217234	0.0201213
																				GO:2000515	negative regulation of CD4-positive, alpha-beta T cell activation	0.00217234	0.0201213
																				GO:0043299	leukocyte degranulation	0.00222934	0.0205926
																				GO:0043116	negative regulation of vascular permeability	0.00223301	0.0205926
																				GO:0071625	vocalization behavior	0.00223301	0.0205926
																				GO:2001233	regulation of apoptotic signaling pathway	0.00224443	0.0206677
																				GO:0045687	positive regulation of glial cell differentiation	0.00226695	0.0208447
																				GO:0002062	chondrocyte differentiation	0.00231029	0.0212123
																				GO:0002790	peptide secretion	0.00232459	0.0212531
																				GO:0034644	cellular response to UV	0.00232482	0.0212531
																				GO:0050672	negative regulation of lymphocyte proliferation	0.00232482	0.0212531
																				GO:0002685	regulation of leukocyte migration	0.00233259	0.0212555
																				GO:0050679	positive regulation of epithelial cell proliferation	0.00233259	0.0212555
																				GO:0006661	phosphatidylinositol biosynthetic process	0.00234312	0.0212555
																				GO:0014910	regulation of smooth muscle cell migration	0.00234312	0.0212555
																				GO:0030168	platelet activation	0.00234312	0.0212555
																				GO:0002275	myeloid cell activation involved in immune response	0.00234527	0.0212555
																				GO:0060491	regulation of cell projection assembly	0.00238541	0.0215883
																				GO:0010633	negative regulation of epithelial cell migration	0.00240157	0.0216725
																				GO:0030968	endoplasmic reticulum unfolded protein response	0.00240157	0.0216725
																				GO:0042088	T-helper 1 type immune response	0.0024448	0.0219997
																				GO:0046640	regulation of alpha-beta T cell proliferation	0.0024448	0.0219997
																				GO:0050731	positive regulation of peptidyl-tyrosine phosphorylation	0.00249421	0.0224124
																				GO:1990874	vascular associated smooth muscle cell proliferation	0.00250986	0.0224303
																				GO:0001574	ganglioside biosynthetic process	0.0025104	0.0224303
																				GO:0002295	T-helper cell lineage commitment	0.0025104	0.0224303
																				GO:0070206	protein trimerization	0.0025104	0.0224303
																				GO:0046883	regulation of hormone secretion	0.00252158	0.0224984
																				GO:1901890	positive regulation of cell junction assembly	0.00256346	0.0228174
																				GO:0001909	leukocyte mediated cytotoxicity	0.00256456	0.0228174
																				GO:0072001	renal system development	0.00257106	0.0228431
																				GO:0019233	sensory perception of pain	0.00257774	0.0228702
																				GO:0042761	very long-chain fatty acid biosynthetic process	0.00258587	0.0228747
																				GO:0072540	T-helper 17 cell lineage commitment	0.00258587	0.0228747
																				GO:0050857	positive regulation of antigen receptor-mediated signaling pathway	0.00258911	0.0228747
																				GO:0033028	myeloid cell apoptotic process	0.00260373	0.0229717
																				GO:0006986	response to unfolded protein	0.00260873	0.0229838
																				GO:0032945	negative regulation of mononuclear cell proliferation	0.0026679	0.0233949
																				GO:0045685	regulation of glial cell differentiation	0.0026679	0.0233949
																				GO:0002791	regulation of peptide secretion	0.00267565	0.0233949
																				GO:0060541	respiratory system development	0.00267565	0.0233949
																				GO:0002534	cytokine production involved in inflammatory response	0.00267762	0.0233949
																				GO:0070534	protein K63-linked ubiquitination	0.00267762	0.0233949
																				GO:0051961	negative regulation of nervous system development	0.00271665	0.0237032
																				GO:0034113	heterotypic cell-cell adhesion	0.00273627	0.0238414
																				GO:0046628	positive regulation of insulin receptor signaling pathway	0.00275761	0.0239613
																				GO:2000316	regulation of T-helper 17 type immune response	0.00275761	0.0239613
																				GO:0099560	synaptic membrane adhesion	0.00278896	0.0242003
																				GO:0010639	negative regulation of organelle organization	0.00281783	0.0244173
																				GO:0034655	nucleobase-containing compound catabolic process	0.0028532	0.02469
																				GO:0030048	actin filament-based movement	0.0028798	0.024886
																				GO:0022604	regulation of cell morphogenesis	0.00294703	0.0254322
																				GO:0046488	phosphatidylinositol metabolic process	0.00296102	0.0255173
																				GO:0045682	regulation of epidermis development	0.00297278	0.0255173
																				GO:0052548	regulation of endopeptidase activity	0.00297492	0.0255173
																				GO:0046596	regulation of viral entry into host cell	0.00297709	0.0255173
																				GO:0061005	cell differentiation involved in kidney development	0.00297709	0.0255173
																				GO:0002381	immunoglobulin production involved in immunoglobulin-mediated immune response	0.00299399	0.0256274
																				GO:0016358	dendrite development	0.00303445	0.0259152
																				GO:0045913	positive regulation of carbohydrate metabolic process	0.00303581	0.0259152
																				GO:0070664	negative regulation of leukocyte proliferation	0.0030483	0.0259797
																				GO:0006401	RNA catabolic process	0.0030516	0.0259797
																				GO:0043393	regulation of protein binding	0.00305691	0.0259899
																				GO:0090087	regulation of peptide transport	0.00311666	0.0264623
																				GO:0046629	gamma-delta T cell activation	0.00313855	0.0265767
																				GO:0050849	negative regulation of calcium-mediated signaling	0.00313855	0.0265767
																				GO:0060350	endochondral bone morphogenesis	0.00315762	0.0267024
																				GO:0031331	positive regulation of cellular catabolic process	0.00321723	0.0271181
																				GO:0099111	microtubule-based transport	0.00321774	0.0271181
																				GO:0046879	hormone secretion	0.00321966	0.0271181
																				GO:0043500	muscle adaptation	0.00322866	0.0271577
																				GO:0031503	protein-containing complex localization	0.00324404	0.0272508
																				GO:0120032	regulation of plasma membrane bounded cell projection assembly	0.00326464	0.0273874
																				GO:0050729	positive regulation of inflammatory response	0.00329073	0.0275369
																				GO:0006900	vesicle budding from membrane	0.00329553	0.0275369
																				GO:1904705	regulation of vascular associated smooth muscle cell proliferation	0.00329553	0.0275369
																				GO:0006520	amino acid metabolic process	0.00335978	0.0280366
																				GO:0061448	connective tissue development	0.00337051	0.0280891
																				GO:0043154	negative regulation of cysteine-type endopeptidase activity involved in apoptotic process	0.00339183	0.0282295
																				GO:0061640	cytoskeleton-dependent cytokinesis	0.00346307	0.0287629
																				GO:0097396	response to interleukin-17	0.00346957	0.0287629
																				GO:1901223	negative regulation of NIK/NF-kappaB signaling	0.00346957	0.0287629
																				GO:1903035	negative regulation of response to wounding	0.00348069	0.0288172
																				GO:0032984	protein-containing complex disassembly	0.00351481	0.0290507
																				GO:0072073	kidney epithelium development	0.00351809	0.0290507
																				GO:0032615	interleukin-12 production	0.00352426	0.0290636
																				GO:0032958	inositol phosphate biosynthetic process	0.0035798	0.0293985
																				GO:0050858	negative regulation of antigen receptor-mediated signaling pathway	0.0035798	0.0293985
																				GO:0090502	RNA phosphodiester bond hydrolysis, endonucleolytic	0.0035798	0.0293985
																				GO:0048284	organelle fusion	0.00358422	0.0293985
																				GO:0002823	negative regulation of adaptive immune response based on somatic recombination of immune receptors built from immunoglobulin superfamily domains	0.00360067	0.0293985
																				GO:0008089	anterograde axonal transport	0.00360067	0.0293985
																				GO:1902895	positive regulation of miRNA transcription	0.00360067	0.0293985
																				GO:0071559	response to transforming growth factor beta	0.00360209	0.0293985
																				GO:0032957	inositol trisphosphate metabolic process	0.0036803	0.0299482
																				GO:2001267	regulation of cysteine-type endopeptidase activity involved in apoptotic signaling pathway	0.0036803	0.0299482
																				GO:0036293	response to decreased oxygen levels	0.00368367	0.0299482
																				GO:0046513	ceramide biosynthetic process	0.0037067	0.0300967
																				GO:0006605	protein targeting	0.00373419	0.030281
																				GO:0015833	peptide transport	0.00377037	0.0305352
																				GO:0060997	dendritic spine morphogenesis	0.0038368	0.0310333
																				GO:0002456	T cell mediated immunity	0.00389014	0.0314026
																				GO:0045923	positive regulation of fatty acid metabolic process	0.00391407	0.0314026
																				GO:0070374	positive regulation of ERK1 and ERK2 cascade	0.0039142	0.0314026
																				GO:2001236	regulation of extrinsic apoptotic signaling pathway	0.00394528	0.0314026
																				GO:0000244	spliceosomal tri-snRNP complex assembly	0.00394707	0.0314026
																				GO:0001731	formation of translation preinitiation complex	0.00394707	0.0314026
																				GO:0002934	desmosome organization	0.00394707	0.0314026
																				GO:0003330	regulation of extracellular matrix constituent secretion	0.00394707	0.0314026
																				GO:0006646	phosphatidylethanolamine biosynthetic process	0.00394707	0.0314026
																				GO:0032594	protein transport within lipid bilayer	0.00394707	0.0314026
																				GO:0033504	floor plate development	0.00394707	0.0314026
																				GO:1903044	protein localization to membrane raft	0.00394707	0.0314026
																				GO:1904238	pericyte cell differentiation	0.00394707	0.0314026
																				GO:0055088	lipid homeostasis	0.00395676	0.0314401
																				GO:0051402	neuron apoptotic process	0.00400074	0.0317496
																				GO:0043406	positive regulation of MAP kinase activity	0.0040344	0.0319189
																				GO:0048259	regulation of receptor-mediated endocytosis	0.0040344	0.0319189
																				GO:0021554	optic nerve development	0.0040625	0.0319189
																				GO:0030497	fatty acid elongation	0.0040625	0.0319189
																				GO:0045060	negative thymic T cell selection	0.0040625	0.0319189
																				GO:0046174	polyol catabolic process	0.0040625	0.0319189
																				GO:0060073	micturition	0.0040625	0.0319189
																				GO:0070207	protein homotrimerization	0.0040625	0.0319189
																				GO:0002687	positive regulation of leukocyte migration	0.00411883	0.0323213
																				GO:0006006	glucose metabolic process	0.00412898	0.0323607
																				GO:0043277	apoptotic cell clearance	0.00420421	0.0329095
																				GO:1990138	neuron projection extension	0.00422218	0.0330093
																				GO:0010880	regulation of release of sequestered calcium ion into cytosol by sarcoplasmic reticulum	0.00430535	0.0336179
																				GO:0045581	negative regulation of T cell differentiation	0.00432663	0.0336744
																				GO:0019080	viral gene expression	0.00433212	0.0336744
																				GO:0051170	import into nucleus	0.00433293	0.0336744
																				GO:0051098	regulation of binding	0.0043339	0.0336744
																				GO:0002832	negative regulation of response to biotic stimulus	0.00434924	0.0337106
																				GO:0072329	monocarboxylic acid catabolic process	0.00434924	0.0337106
																				GO:0002027	regulation of heart rate	0.00435486	0.0337128
																				GO:0060441	epithelial tube branching involved in lung morphogenesis	0.00444221	0.0342959
																				GO:0098698	postsynaptic specialization assembly	0.00444221	0.0342959
																				GO:0071560	cellular response to transforming growth factor beta stimulus	0.00444647	0.0342959
																				GO:0019079	viral genome replication	0.00449683	0.0345999
																				GO:0045931	positive regulation of mitotic cell cycle	0.00449683	0.0345999
																				GO:0000910	cytokinesis	0.00454347	0.0349161
																				GO:0032069	regulation of nuclease activity	0.0045688	0.0350208
																				GO:1905207	regulation of cardiocyte differentiation	0.0045688	0.0350208
																				GO:0010922	positive regulation of phosphatase activity	0.0045848	0.0350208
																				GO:0031295	T cell costimulation	0.0045848	0.0350208
																				GO:0050687	negative regulation of defense response to virus	0.0045848	0.0350208
																				GO:2001238	positive regulation of extrinsic apoptotic signaling pathway	0.00464537	0.0354406
																				GO:0050807	regulation of synapse organization	0.00470827	0.0358771
																				GO:0043124	negative regulation of I-kappaB kinase/NF-kappaB signaling	0.00474492	0.0360694
																				GO:0050856	regulation of T cell receptor signaling pathway	0.00474492	0.0360694
																				GO:0072009	nephron epithelium development	0.00477186	0.0362306
																				GO:0042180	cellular ketone metabolic process	0.00480052	0.0363608
																				GO:0045664	regulation of neuron differentiation	0.00480052	0.0363608
																				GO:0014013	regulation of gliogenesis	0.00482827	0.0365272
																				GO:0030101	natural killer cell activation	0.00489386	0.0369349
																				GO:0048661	positive regulation of smooth muscle cell proliferation	0.00489386	0.0369349
																				GO:0048813	dendrite morphogenesis	0.00492316	0.0371117
																				GO:0006606	protein import into nucleus	0.0049748	0.0374562
																				GO:0046890	regulation of lipid biosynthetic process	0.00498545	0.0374918
																				GO:0044262	cellular carbohydrate metabolic process	0.0049946	0.0375146
																				GO:1901216	positive regulation of neuron death	0.00500289	0.0375146
																				GO:0019439	aromatic compound catabolic process	0.0050063	0.0375146
																				GO:0030239	myofibril assembly	0.00504151	0.0377337
																				GO:0050803	regulation of synapse structure or activity	0.00507337	0.0379106
																				GO:0044270	cellular nitrogen compound catabolic process	0.00508566	0.0379106
																				GO:0046700	heterocycle catabolic process	0.00508566	0.0379106
																				GO:1904063	negative regulation of cation transmembrane transport	0.00508915	0.0379106
																				GO:0090287	regulation of cellular response to growth factor stimulus	0.00510527	0.0379858
																				GO:0018105	peptidyl-serine phosphorylation	0.00513247	0.0380475
																				GO:0006919	activation of cysteine-type endopeptidase activity involved in apoptotic process	0.00514027	0.0380475
																				GO:0001782	B cell homeostasis	0.00515229	0.0380475
																				GO:0002347	response to tumor cell	0.00515229	0.0380475
																				GO:0032228	regulation of synaptic transmission, GABAergic	0.00515229	0.0380475
																				GO:0043535	regulation of blood vessel endothelial cell migration	0.00515338	0.0380475
																				GO:0043300	regulation of leukocyte degranulation	0.00516673	0.0380475
																				GO:0099084	postsynaptic specialization organization	0.00516673	0.0380475
																				GO:1904888	cranial skeletal system development	0.00518615	0.0380475
																				GO:0007029	endoplasmic reticulum organization	0.00518795	0.0380475
																				GO:0014015	positive regulation of gliogenesis	0.00518795	0.0380475
																				GO:0009100	glycoprotein metabolic process	0.00520534	0.0380475
																				GO:0032496	response to lipopolysaccharide	0.00520866	0.0380475
																				GO:0006123	mitochondrial electron transport, cytochrome c to oxygen	0.00522196	0.0380475
																				GO:0010867	positive regulation of triglyceride biosynthetic process	0.00522196	0.0380475
																				GO:0032695	negative regulation of interleukin-12 production	0.00522196	0.0380475
																				GO:0042492	gamma-delta T cell differentiation	0.00522196	0.0380475
																				GO:1905874	regulation of postsynaptic density organization	0.00522196	0.0380475
																				GO:0033157	regulation of intracellular protein transport	0.00525169	0.0382199
																				GO:0071902	positive regulation of protein serine/threonine kinase activity	0.00525799	0.0382218
																				GO:0051650	establishment of vesicle localization	0.00536623	0.0389638
																				GO:0016570	histone modification	0.00542492	0.0393447
																				GO:0010950	positive regulation of endopeptidase activity	0.00544014	0.0393914
																				GO:0050921	positive regulation of chemotaxis	0.00544476	0.0393914
																				GO:0002204	somatic recombination of immunoglobulin genes involved in immune response	0.00548124	0.0393914
																				GO:0002208	somatic diversification of immunoglobulins involved in immune response	0.00548124	0.0393914
																				GO:0006911	phagocytosis, engulfment	0.00548124	0.0393914
																				GO:0043407	negative regulation of MAP kinase activity	0.00548124	0.0393914
																				GO:0045190	isotype switching	0.00548124	0.0393914
																				GO:1903053	regulation of extracellular matrix organization	0.00548124	0.0393914
																				GO:0001822	kidney development	0.0054934	0.0394339
																				GO:0140694	non-membrane-bounded organelle assembly	0.00551263	0.0394388
																				GO:0033032	regulation of myeloid cell apoptotic process	0.00551906	0.0394388
																				GO:0046677	response to antibiotic	0.00551906	0.0394388
																				GO:1904037	positive regulation of epithelial cell apoptotic process	0.00551906	0.0394388
																				GO:0051216	cartilage development	0.00554926	0.0396098
																				GO:0032611	interleukin-1 beta production	0.00562513	0.0400608
																				GO:0046889	positive regulation of lipid biosynthetic process	0.00562513	0.0400608
																				GO:0006665	sphingolipid metabolic process	0.00568111	0.0404139
																				GO:0001954	positive regulation of cell-matrix adhesion	0.00570209	0.0405063
																				GO:0071526	semaphorin-plexin signaling pathway	0.00571166	0.0405063
																				GO:0050768	negative regulation of neurogenesis	0.00571333	0.0405063
																				GO:0072091	regulation of stem cell proliferation	0.00574453	0.0406516
																				GO:0035303	regulation of dephosphorylation	0.00575717	0.0406516
																				GO:0009081	branched-chain amino acid metabolic process	0.00577888	0.0406516
																				GO:0019076	viral release from host cell	0.00577888	0.0406516
																				GO:0034405	response to fluid shear stress	0.00577888	0.0406516
																				GO:0035891	exit from host cell	0.00577888	0.0406516
																				GO:0043371	negative regulation of CD4-positive, alpha-beta T cell differentiation	0.00577888	0.0406516
																				GO:0000038	very long-chain fatty acid metabolic process	0.00579887	0.0407016
																				GO:0007097	nuclear migration	0.00579887	0.0407016
																				GO:0055002	striated muscle cell development	0.00584292	0.0409653
																				GO:1905897	regulation of response to endoplasmic reticulum stress	0.00591646	0.0411914
																				GO:0032740	positive regulation of interleukin-17 production	0.00592081	0.0411914
																				GO:0034104	negative regulation of tissue remodeling	0.00592081	0.0411914
																				GO:0051560	mitochondrial calcium ion homeostasis	0.00592081	0.0411914
																				GO:0060571	morphogenesis of an epithelial fold	0.00592081	0.0411914
																				GO:0071108	protein K48-linked deubiquitination	0.00592081	0.0411914
																				GO:0090208	positive regulation of triglyceride metabolic process	0.00592081	0.0411914
																				GO:0006809	nitric oxide biosynthetic process	0.00593409	0.0412383
																				GO:0001508	action potential	0.0059935	0.0415597
																				GO:0008643	carbohydrate transport	0.0059935	0.0415597
																				GO:0048639	positive regulation of developmental growth	0.00600463	0.0415824
																				GO:0006402	mRNA catabolic process	0.00600993	0.0415824
																				GO:0003205	cardiac chamber development	0.00602363	0.0416139
																				GO:0006465	signal peptide processing	0.00608036	0.0416139
																				GO:0014004	microglia differentiation	0.00608036	0.0416139
																				GO:0032645	regulation of granulocyte macrophage colony-stimulating factor production	0.00608036	0.0416139
																				GO:0032688	negative regulation of interferon-beta production	0.00608036	0.0416139
																				GO:0045586	regulation of gamma-delta T cell differentiation	0.00608036	0.0416139
																				GO:0046643	regulation of gamma-delta T cell activation	0.00608036	0.0416139
																				GO:0048711	positive regulation of astrocyte differentiation	0.00608036	0.0416139
																				GO:0099151	regulation of postsynaptic density assembly	0.00608036	0.0416139
																				GO:2001138	regulation of phospholipid transport	0.00608036	0.0416139
																				GO:0010596	negative regulation of endothelial cell migration	0.00613332	0.0417886
																				GO:0048701	embryonic cranial skeleton morphogenesis	0.00613332	0.0417886
																				GO:1901861	regulation of muscle tissue development	0.00613332	0.0417886
																				GO:1903170	negative regulation of calcium ion transmembrane transport	0.00613332	0.0417886
																				GO:0035967	cellular response to topologically incorrect protein	0.00613896	0.0417886
																				GO:0045732	positive regulation of protein catabolic process	0.00619189	0.0421035
																				GO:0021700	developmental maturation	0.00621934	0.0422447
																				GO:0048873	homeostasis of number of cells within a tissue	0.00626293	0.0424495
																				GO:0061098	positive regulation of protein tyrosine kinase activity	0.00626293	0.0424495
																				GO:0051058	negative regulation of small GTPase mediated signal transduction	0.00643443	0.0435185
																				GO:1900015	regulation of cytokine production involved in inflammatory response	0.00643443	0.0435185
																				GO:0070585	protein localization to mitochondrion	0.00646791	0.0436943
																				GO:0043487	regulation of RNA stability	0.00648111	0.0436943
																				GO:0002357	defense response to tumor cell	0.00651576	0.0436943
																				GO:0051469	vesicle fusion with vacuole	0.00651576	0.0436943
																				GO:0061763	multivesicular body-lysosome fusion	0.00651576	0.0436943
																				GO:0070327	thyroid hormone transport	0.00651576	0.0436943
																				GO:0075522	IRES-dependent viral translational initiation	0.00651576	0.0436943
																				GO:1903265	positive regulation of tumor necrosis factor-mediated signaling pathway	0.00651576	0.0436943
																				GO:0046165	alcohol biosynthetic process	0.0065378	0.0437957
																				GO:0051047	positive regulation of secretion	0.00662551	0.0443362
																				GO:0007032	endosome organization	0.00663269	0.0443373
																				GO:0007040	lysosome organization	0.00670301	0.0447127
																				GO:0080171	lytic vacuole organization	0.00670301	0.0447127
																				GO:0032481	positive regulation of type I interferon production	0.00674474	0.0448289
																				GO:0022406	membrane docking	0.00676785	0.0448289
																				GO:0034103	regulation of tissue remodeling	0.00676785	0.0448289
																				GO:0060998	regulation of dendritic spine development	0.00676785	0.0448289
																				GO:0045453	bone resorption	0.00678547	0.0448289
																				GO:0051965	positive regulation of synapse assembly	0.00678547	0.0448289
																				GO:1903578	regulation of ATP metabolic process	0.00678547	0.0448289
																				GO:0019432	triglyceride biosynthetic process	0.00679139	0.0448289
																				GO:0032232	negative regulation of actin filament bundle assembly	0.00679139	0.0448289
																				GO:0032633	interleukin-4 production	0.00679139	0.0448289
																				GO:0007030	Golgi organization	0.00681433	0.0449333
																				GO:0046854	phosphatidylinositol phosphate biosynthetic process	0.00682927	0.0449849
																				GO:0032412	regulation of monoatomic ion transmembrane transporter activity	0.00688135	0.0452807
																				GO:0002761	regulation of myeloid leukocyte differentiation	0.00689501	0.0453234
																				GO:0048525	negative regulation of viral process	0.00706699	0.0464056
																				GO:0006625	protein targeting to peroxisome	0.00720141	0.0467536
																				GO:0030889	negative regulation of B cell proliferation	0.00720141	0.0467536
																				GO:0035457	cellular response to interferon-alpha	0.00720141	0.0467536
																				GO:0035518	histone H2A monoubiquitination	0.00720141	0.0467536
																				GO:0042026	protein refolding	0.00720141	0.0467536
																				GO:0043373	CD4-positive, alpha-beta T cell lineage commitment	0.00720141	0.0467536
																				GO:0045623	negative regulation of T-helper cell differentiation	0.00720141	0.0467536
																				GO:0072662	protein localization to peroxisome	0.00720141	0.0467536
																				GO:0072663	establishment of protein localization to peroxisome	0.00720141	0.0467536
																				GO:0099150	regulation of postsynaptic specialization assembly	0.00720141	0.0467536
																				GO:0140467	integrated stress response signaling	0.00720141	0.0467536
																				GO:0052372	modulation by symbiont of entry into host	0.00723934	0.0469211
																				GO:0031294	lymphocyte costimulation	0.00724948	0.0469211
																				GO:0045746	negative regulation of Notch signaling pathway	0.00724948	0.0469211
																				GO:0045765	regulation of angiogenesis	0.00742048	0.0479066
																				GO:0051494	negative regulation of cytoskeleton organization	0.00743891	0.0479066
																				GO:0006367	transcription initiation at RNA polymerase II promoter	0.00743967	0.0479066
																				GO:0009408	response to heat	0.00743967	0.0479066
																				GO:0031960	response to corticosteroid	0.00743967	0.0479066
																				GO:0001778	plasma membrane repair	0.00756109	0.0485894
																				GO:0061099	negative regulation of protein tyrosine kinase activity	0.00756109	0.0485894
																				GO:2001057	reactive nitrogen species metabolic process	0.00758584	0.0486828
																				GO:0010866	regulation of triglyceride biosynthetic process	0.00760644	0.0486828
																				GO:0014808	release of sequestered calcium ion into cytosol by sarcoplasmic reticulum	0.00760644	0.0486828
																				GO:0051457	maintenance of protein location in nucleus	0.00760644	0.0486828
																				GO:0007422	peripheral nervous system development	0.00775572	0.0495437
																				GO:0048193	Golgi vesicle transport	0.00775664	0.0495437
																				GO:0071383	cellular response to steroid hormone stimulus	0.00783315	0.0499818
[truncated: 78 more columns]
