# Supplementary material for: Population level analyses reveal contrasting landscapes of gene expression divergence and evolution between male and female transcriptome lineages in the house mouse
Source: Research Square preprint supplement (doi:10.21203/rs.3.rs-6634316/v1), 2025-05-22
Supplement: Supplementary file 4 [file 361559292c1a14ea198134ed.xlsx]

## Sheet: Data S1A
Supplementary Data S1A. Summary information of RNA-Seq data for inter-subspecies and inter-species comparison analysis. These transcriptomic sequencing datasets were retrieved from Xie et al 2024 eLife. The mapping rate info from each RNA-seq dataset was extracted from the STAR alignment output files.
Species	Subspecies	Geographic_location	Study_accession	Sequence_Platform	Read_Length(bp)	Individual_ID	Sample_gender	Somatic organ															Gonadal organ
								Brain			Heart			Kidney			Liver			Mammary gland			Epididymis			Uterus			Testis			Ovary			Vas_Deferens			Oviduct
								Sample_accession	Sequenced_read_pairs(*)	Mapping rate	Sample_accession	Sequenced_read_pairs	Mapping rate	Sample_accession	Sequenced_read_pairs	Mapping rate	Sample_accession	Sequenced_read_pairs	Mapping rate	Sample_accession	Sequenced_read_pairs	Mapping rate	Sample_accession	Sequenced_read_pairs	Mapping rate	Sample_accession	Sequenced_read_pairs	Mapping rate	Sample_accession	Sequenced_read_pairs	Mapping rate	Sample_accession	Sequenced_read_pairs	Mapping rate	Sample_accession	Sequenced_read_pairs	Mapping rate	Sample_accession	Sequenced_read_pairs	Mapping rate
Mus musculus	M.m.dom	France (FR)	PRJEB50011	Illumina NovaSeq 6000	2*150	DOM62	Male	ERS4361135	27200000	0.9777	ERS4361136	32200000	0.9734	ERS4361138	27600000	0.9779	ERS4361137	31900000	0.8305	ERS9451931	49746280	0.9753	ERS9452732	112332300	0.9782	-	-	-	ERS4361139	34200000	0.98	-	-	-	ERS9452772	69000000	0.9727	-	-	-
Mus musculus	M.m.dom	France (FR)	PRJEB50011	Illumina NovaSeq 6000	2*150	DOM63	Male	ERS4361140	22800000	0.9746	ERS4361141	30500000	0.9731	ERS4361143	29700000	0.9785	ERS4361142	27000000	0.8391	ERS9451932	61464980	0.9686	ERS9452733	59163730	0.9778	-	-	-	ERS4361144	36800000	0.98	-	-	-	ERS9452773	76100000	0.9764	-	-	-
Mus musculus	M.m.dom	France (FR)	PRJEB50011	Illumina NovaSeq 6000	2*150	DOM64	Male	ERS4361145	22100000	0.9717	ERS4361146	40500000	0.9719	ERS4361148	31700000	0.9794	ERS4361147	26000000	0.8626	ERS9451933	74835950	0.9649	ERS9452734	51291030	0.9762	-	-	-	ERS4361149	31400000	0.9821	-	-	-	ERS9452774	89700000	0.9563	-	-	-
Mus musculus	M.m.dom	France (FR)	PRJEB50011	Illumina NovaSeq 6000	2*150	DOM65	Male	ERS4361150	27700000	0.9747	ERS4361151	28700000	0.9631	ERS4361153	25900000	0.977	ERS4361152	28600000	0.878	ERS9451934	77368380	0.9765	ERS9452735	60775660	0.9753	-	-	-	ERS4361154	36000000	0.9799	-	-	-	ERS9452775	71300000	0.9566	-	-	-
Mus musculus	M.m.dom	France (FR)	PRJEB50011	Illumina NovaSeq 6000	2*150	DOM66	Male	ERS4361155	28600000	0.9747	ERS4361156	25300000	0.9766	ERS4361158	24500000	0.9738	ERS4361157	25200000	0.8494	ERS9451935	76873490	0.9761	ERS9452736	71489820	0.9761	-	-	-	ERS4361159	32600000	0.98	-	-	-	ERS9452776	81200000	0.9562	-	-	-
Mus musculus	M.m.dom	France (FR)	PRJEB50011	Illumina NovaSeq 6000	2*150	DOM67	Male	ERS4361160	28000000	0.9651	ERS4361161	24800000	0.9776	ERS4361163	21800000	0.9716	ERS4361162	25000000	0.8436	ERS9451936	76986050	0.9733	ERS9452737	59673660	0.9761	-	-	-	ERS4361164	37500000	0.978	-	-	-	ERS9452777	87700000	0.9744	-	-	-
Mus musculus	M.m.dom	France (FR)	PRJEB50011	Illumina NovaSeq 6000	2*150	DOM68	Male	ERS4361165	21600000	0.9744	ERS4361166	28400000	0.9801	ERS4361168	25000000	0.9755	ERS4361167	27000000	0.8618	ERS9451937	68582880	0.9616	ERS9452738	57794720	0.9755	-	-	-	ERS4361169	41800000	0.9797	-	-	-	ERS9452778	102000000	0.9742	-	-	-
Mus musculus	M.m.dom	France (FR)	PRJEB50011	Illumina NovaSeq 6000	2*150	DOM69	Male	ERS4361170	24600000	0.9684	ERS4361171	24300000	0.9782	ERS4361173	27200000	0.97	ERS4361172	31200000	0.8922	ERS9451938	101218400	0.9844	ERS9452739	58196500	0.9738	-	-	-	ERS4361174	32200000	0.9799	-	-	-	ERS9452779	63800000	0.9617	-	-	-
Mus musculus	M.m.dom	France (FR)	PRJEB50011	Illumina NovaSeq 6000	2*150	DOM70	Male	ERS4361175	32500000	0.9721	ERS4361176	22900000	0.9807	ERS4361178	22900000	0.9733	ERS4361177	32600000	0.8547	ERS9451939	99441070	0.9787	ERS9452740	58013830	0.9791	-	-	-	ERS4361179	42300000	0.9792	-	-	-	ERS9452780	86600000	0.9644	-	-	-
Mus musculus	M.m.dom	France (FR)	PRJEB50011	Illumina NovaSeq 6000	2*150	DOM11	Female	ERS9451447	62056760	0.9605	ERS9451556	72345900	0.9705	ERS9451664	51851620	0.9786	ERS9451773	70287490	0.92	ERS9451880	84624230	0.9739	-	-	-	ERS9452506	62100000	0.9818	-	-	-	ERS9452116	65191390	0.9815	-	-	-	ERS9452312	49262090	0.9766
Mus musculus	M.m.dom	France (FR)	PRJEB50011	Illumina NovaSeq 6000	2*150	DOM12	Female	ERS9451448	54513660	0.9732	ERS9451557	78077780	0.9624	ERS9451665	59280780	0.978	ERS9451774	52440930	0.9485	ERS9451881	73159640	0.978	-	-	-	ERS9452507	86500000	0.9788	-	-	-	ERS9452117	87221610	0.9787	-	-	-	ERS9452313	69180600	0.9789
Mus musculus	M.m.dom	France (FR)	PRJEB50011	Illumina NovaSeq 6000	2*150	DOM13	Female	ERS9451449	69806770	0.9661	ERS9451558	44566910	0.9718	ERS9451666	91943970	0.9752	ERS9451775	76996920	0.9481	ERS9451882	66685390	0.9732	-	-	-	ERS9452508	81700000	0.9813	-	-	-	ERS9452118	85062350	0.9814	-	-	-	ERS9452314	65435500	0.9783
Mus musculus	M.m.dom	France (FR)	PRJEB50011	Illumina NovaSeq 6000	2*150	DOM14	Female	ERS9451450	61357360	0.9725	ERS9451559	46090710	0.972	ERS9451667	68184230	0.9769	ERS9451776	73641260	0.9438	ERS9451883	65535840	0.9685	-	-	-	ERS9452509	55900000	0.9837	-	-	-	ERS9452119	55959110	0.9794	-	-	-	ERS9452315	60793960	0.9749
Mus musculus	M.m.dom	France (FR)	PRJEB50011	Illumina NovaSeq 6000	2*150	DOM15	Female	ERS9451451	76294110	0.9744	ERS9451560	54193060	0.9771	ERS9451668	55059340	0.9787	ERS9451777	54380480	0.9143	ERS9451884	48511280	0.9555	-	-	-	ERS9452510	57800000	0.9805	-	-	-	ERS9452120	78656070	0.9743	-	-	-	ERS9452316	84764480	0.9782
Mus musculus	M.m.dom	France (FR)	PRJEB50011	Illumina NovaSeq 6000	2*150	DOM16	Female	ERS9451452	57522240	0.9764	ERS9451561	60478350	0.9756	ERS9451669	65097510	0.9769	ERS9451778	50716470	0.9283	ERS9451885	36053320	0.9807	-	-	-	ERS9452511	100000000	0.9825	-	-	-	ERS9452121	58231050	0.9795	-	-	-	ERS9452317	72056810	0.9802
Mus musculus	M.m.dom	France (FR)	PRJEB50011	Illumina NovaSeq 6000	2*150	DOM17	Female	ERS9451453	80890950	0.9726	ERS9451562	66669900	0.9792	ERS9451670	77640890	0.9758	ERS9451779	64967390	0.9419	ERS9451886	39725820	0.9767	-	-	-	ERS9452512	64900000	0.9773	-	-	-	ERS9452122	54065830	0.9815	-	-	-	ERS9452318	59481950	0.971
Mus musculus	M.m.dom	France (FR)	PRJEB50011	Illumina NovaSeq 6000	2*150	DOM18	Female	ERS9451454	61800480	0.9715	ERS9451563	59018000	0.9777	ERS9451671	57523840	0.977	ERS9451780	81401300	0.915	ERS9451887	50032170	0.9707	-	-	-	ERS9452513	71300000	0.9794	-	-	-	ERS9452123	50178320	0.9813	-	-	-	ERS9452319	78182390	0.9745
Mus musculus	M.m.dom	France (FR)	PRJEB50011	Illumina NovaSeq 6000	2*150	DOM19	Female	ERS9451455	54266640	0.9665	ERS9451564	77899030	0.9753	ERS9451672	56847160	0.9677	ERS9451781	45726380	0.9292	ERS9451888	116707200	0.9827	-	-	-	ERS9452514	49200000	0.9807	-	-	-	ERS9452124	67640950	0.9799	-	-	-	ERS9452320	78131320	0.9812
Mus musculus	M.m.mus	Kazakhstan (KA)	PRJEB50011	Illumina NovaSeq 6000	2*150	MUS61	Male	ERS9451507	37500000	0.9735	ERS9451615	51500000	0.9722	ERS9451724	13200000	0.9779	ERS9451831	31500000	0.8305	ERS9451990	79619030	0.9592	ERS9452741	88046480	0.9643	-	-	-	ERS9452701	17100000	0.98	-	-	-	ERS9452781	44400000	0.9696	-	-	-
Mus musculus	M.m.mus	Kazakhstan (KA)	PRJEB50011	Illumina NovaSeq 6000	2*150	MUS62	Male	ERS9451508	23500000	0.9792	ERS9451616	17700000	0.9795	ERS9451725	44900000	0.9785	ERS9451832	31100000	0.8391	ERS9451991	75823350	0.9617	ERS9452742	56315050	0.9627	-	-	-	ERS9452702	22900000	0.98	-	-	-	ERS9452782	43800000	0.9677	-	-	-
Mus musculus	M.m.mus	Kazakhstan (KA)	PRJEB50011	Illumina NovaSeq 6000	2*150	MUS63	Male	ERS9451509	42200000	0.9786	ERS9451617	82300000	0.972	ERS9451726	43300000	0.9794	ERS9451833	45000000	0.8626	ERS9451992	86467180	0.9614	ERS9452743	77869420	0.9652	-	-	-	ERS9452703	12700000	0.9821	-	-	-	ERS9452783	59400000	0.9578	-	-	-
Mus musculus	M.m.mus	Kazakhstan (KA)	PRJEB50011	Illumina NovaSeq 6000	2*150	MUS64	Male	ERS9451510	24800000	0.975	ERS9451618	54300000	0.9793	ERS9451727	49000000	0.977	ERS9451834	50600000	0.878	ERS9451993	65179450	0.9627	ERS9452744	51049370	0.9533	-	-	-	ERS9452704	17700000	0.9799	-	-	-	ERS9452784	38800000	0.9653	-	-	-
Mus musculus	M.m.mus	Kazakhstan (KA)	PRJEB50011	Illumina NovaSeq 6000	2*150	MUS65	Male	ERS9451511	47300000	0.9678	ERS9451619	45700000	0.9698	ERS9451728	46300000	0.9738	ERS9451835	49600000	0.8494	ERS9451994	101399200	0.9581	ERS9452745	59182870	0.9573	-	-	-	ERS9452705	13400000	0.98	-	-	-	ERS9452785	80100000	0.9633	-	-	-
Mus musculus	M.m.mus	Kazakhstan (KA)	PRJEB50011	Illumina NovaSeq 6000	2*150	MUS66	Male	ERS9451512	29200000	0.979	ERS9451620	40300000	0.9596	ERS9451729	12600000	0.9716	ERS9451836	42100000	0.8436	ERS9451995	38081000	0.9763	ERS9452746	71301760	0.9605	-	-	-	ERS9452706	12100000	0.978	-	-	-	ERS9452786	63700000	0.9665	-	-	-
Mus musculus	M.m.mus	Kazakhstan (KA)	PRJEB50011	Illumina NovaSeq 6000	2*150	MUS67	Male	ERS9451513	29300000	0.9764	ERS9451621	56000000	0.9689	ERS9451730	63000000	0.9755	ERS9451837	36800000	0.8618	ERS9451996	94414020	0.9584	ERS9452747	99700290	0.9678	-	-	-	ERS9452707	33800000	0.9797	-	-	-	ERS9452787	54200000	0.965	-	-	-
Mus musculus	M.m.mus	Kazakhstan (KA)	PRJEB50011	Illumina NovaSeq 6000	2*150	MUS68	Male	ERS9451514	33400000	0.978	ERS9451622	44900000	0.9374	ERS9451731	36400000	0.97	ERS9451838	51000000	0.8922	ERS9451997	54216600	0.9657	ERS9452748	68202730	0.9638	-	-	-	ERS9452708	50300000	0.9799	-	-	-	ERS9452788	71900000	0.9636	-	-	-
Mus musculus	M.m.mus	Kazakhstan (KA)	PRJEB50011	Illumina NovaSeq 6000	2*150	MUS69	Male	ERS9451515	27400000	0.9744	ERS9451623	45200000	0.9712	ERS9451732	54700000	0.9733	ERS9451839	14000000	0.8547	ERS9451998	129362900	0.9725	ERS9452749	72279130	0.9633	-	-	-	ERS9452709	80400000	0.9792	-	-	-	ERS9452789	60400000	0.9576	-	-	-
Mus musculus	M.m.mus	Kazakhstan (KA)	PRJEB50011	Illumina NovaSeq 6000	2*150	MUS11	Female	ERS9451497	97378970	0.9766	ERS9451606	120887400	0.9668	ERS9451714	90301470	0.9717	ERS9451821	162652700	0.9013	ERS9451940	90536510	0.9581	-	-	-	ERS9452556	72100000	0.9636	-	-	-	ERS9452166	98822930	0.964	-	-	-	ERS9452362	40042070	0.9575
Mus musculus	M.m.mus	Kazakhstan (KA)	PRJEB50011	Illumina NovaSeq 6000	2*150	MUS12	Female	ERS9451498	91625310	0.9757	ERS9451607	60521680	0.9801	ERS9451715	109704100	0.9657	ERS9451822	68405790	0.9231	ERS9451941	90524490	0.9605	-	-	-	ERS9452557	75700000	0.9624	-	-	-	ERS9452167	49395680	0.9657	-	-	-	ERS9452363	73044120	0.9619
Mus musculus	M.m.mus	Kazakhstan (KA)	PRJEB50011	Illumina NovaSeq 6000	2*150	MUS13	Female	ERS9451499	63104990	0.9779	ERS9451608	54460720	0.9704	ERS9451716	126658600	0.9652	ERS9451823	102494600	0.8779	ERS9451942	49307670	0.9656	-	-	-	ERS9452558	84900000	0.9596	-	-	-	ERS9452168	95102880	0.9614	-	-	-	ERS9452364	83441650	0.9416
Mus musculus	M.m.mus	Kazakhstan (KA)	PRJEB50011	Illumina NovaSeq 6000	2*150	MUS16	Female	ERS9451500	80073360	0.9728	ERS9451609	67319600	0.9727	ERS9451717	67440290	0.9752	ERS9451824	77749910	0.931	ERS9451945	69074310	0.9625	-	-	-	ERS9452561	33700000	0.9569	-	-	-	ERS9452171	79661030	0.9693	-	-	-	ERS9452367	33455580	0.9508
Mus musculus	M.m.mus	Kazakhstan (KA)	PRJEB50011	Illumina NovaSeq 6000	2*150	MUS17	Female	ERS9451501	69771870	0.975	ERS9451610	77806260	0.9707	ERS9451718	103324000	0.9668	ERS9451825	144179000	0.9215	ERS9451946	52260590	0.9409	-	-	-	ERS9452562	68800000	0.9385	-	-	-	ERS9452172	74582020	0.9657	-	-	-	ERS9452368	36584660	0.9423
Mus musculus	M.m.mus	Kazakhstan (KA)	PRJEB50011	Illumina NovaSeq 6000	2*150	MUS18	Female	ERS9451502	78884660	0.9704	ERS9451611	78555960	0.9741	ERS9451719	64220710	0.9674	ERS9451826	64845550	0.9522	ERS9451947	63247970	0.9663	-	-	-	ERS9452563	58900000	0.9602	-	-	-	ERS9452173	96712430	0.9614	-	-	-	ERS9452369	33249020	0.9531
Mus musculus	M.m.mus	Kazakhstan (KA)	PRJEB50011	Illumina NovaSeq 6000	2*150	MUS22	Female	ERS9451503	96415740	0.9769	ERS9451612	86603000	0.9766	ERS9451720	48325520	0.9779	ERS9451827	113016500	0.9651	ERS9451950	83804080	0.9602	-	-	-	ERS9452566	94800000	0.9675	-	-	-	ERS9452176	85220600	0.963	-	-	-	ERS9452372	59816530	0.9437
Mus musculus	M.m.mus	Kazakhstan (KA)	PRJEB50011	Illumina NovaSeq 6000	2*150	MUS24	Female	ERS9451504	63075690	0.9713	ERS9451613	27481520	0.9777	ERS9451721	73390320	0.9296	ERS9451828	115102000	0.9556	ERS9451952	88934080	0.9609	-	-	-	ERS9452568	89400000	0.9548	-	-	-	ERS9452178	83874120	0.9682	-	-	-	ERS9452374	96278780	0.9734
Mus musculus	M.m.mus	Kazakhstan (KA)	PRJEB50011	Illumina NovaSeq 6000	2*150	MUS26	Female	ERS9451505	79969860	0.9689	ERS9451614	108724100	0.9692	ERS9451722	113336100	0.9685	ERS9451829	70238070	0.9086	ERS9451954	100444400	0.9815	-	-	-	ERS9452570	74100000	0.9716	-	-	-	ERS9452180	93843780	0.9704	-	-	-	ERS9452376	66766950	0.9715
Mus spretus	-	Spain (SP)	PRJEB50011	Illumina NovaSeq 6000	2*150	SPR1	Male	ERS9451526	47700000	0.9654	ERS9451634	59700000	0.9695	ERS9451743	32300000	0.9725	ERS9451850	51600000	0.8621	ERS9452046	49193910	0.9545	ERS9452751	98085400	0.9635	-	-	-	ERS9452711	14600000	0.9704	-	-	-	ERS9452791	78900000	0.9517	-	-	-
Mus spretus	-	Spain (SP)	PRJEB50011	Illumina NovaSeq 6000	2*150	SPR3	Male	ERS9451527	29900000	0.9652	ERS9451635	40800000	0.9616	ERS9451744	63400000	0.9636	ERS9451851	42500000	0.888	ERS9452047	98728140	0.9578	ERS9452752	117910200	0.9638	-	-	-	ERS9452712	24300000	0.9657	-	-	-	ERS9452792	60900000	0.9686	-	-	-
Mus spretus	-	Spain (SP)	PRJEB50011	Illumina NovaSeq 6000	2*150	SPR61	Male	ERS9451528	26400000	0.9693	ERS9451636	39700000	0.953	ERS9451745	72900000	0.963	ERS9451852	35800000	0.8927	ERS9452048	98897380	0.9426	ERS9452753	101690500	0.9637	-	-	-	ERS9452713	19300000	0.9683	-	-	-	ERS9452793	83300000	0.9652	-	-	-
Mus spretus	-	Spain (SP)	PRJEB50011	Illumina NovaSeq 6000	2*150	SPR62	Male	ERS9451529	43000000	0.9703	ERS9451637	45200000	0.9557	ERS9451746	50800000	0.9689	ERS9451853	27700000	0.8556	ERS9452049	84397630	0.9605	ERS9452754	53873320	0.9551	-	-	-	ERS9452714	29500000	0.9672	-	-	-	ERS9452794	94900000	0.953	-	-	-
Mus spretus	-	Spain (SP)	PRJEB50011	Illumina NovaSeq 6000	2*150	SPR63	Male	ERS9451530	41000000	0.9616	ERS9451638	39000000	0.9652	ERS9451747	42700000	0.9601	ERS9451854	39000000	0.893	ERS9452050	74444960	0.9581	ERS9452755	112768200	0.9592	-	-	-	ERS9452715	92500000	0.9412	-	-	-	ERS9452795	80200000	0.9608	-	-	-
Mus spretus	-	Spain (SP)	PRJEB50011	Illumina NovaSeq 6000	2*150	SPR64	Male	ERS9451531	41100000	0.9697	ERS9451639	51500000	0.9696	ERS9451748	52800000	0.9649	ERS9451855	53800000	0.8611	ERS9452051	53237390	0.9445	ERS9452756	114871700	0.9568	-	-	-	ERS9452716	31300000	0.9658	-	-	-	ERS9452796	95400000	0.9692	-	-	-
Mus spretus	-	Spain (SP)	PRJEB50011	Illumina NovaSeq 6000	2*150	SPR65	Male	ERS9451532	35700000	0.9639	ERS9451640	45900000	0.9654	ERS9451749	106000000	0.9725	ERS9451856	67100000	0.8756	ERS9452052	92865840	0.9579	ERS9452757	77667110	0.957	-	-	-	ERS9452717	36300000	0.9686	-	-	-	ERS9452797	93600000	0.9632	-	-	-
Mus spretus	-	Spain (SP)	PRJEB50011	Illumina NovaSeq 6000	2*150	SPR68	Male	ERS9451533	48100000	0.9704	ERS9451641	36300000	0.9555	ERS9451750	43200000	0.9688	ERS9451857	52800000	0.8342	ERS9452053	40146260	0.9368	ERS9452758	68938120	0.9517	-	-	-	ERS9452718	31900000	0.9731	-	-	-	ERS9452798	77100000	0.9592	-	-	-
Mus spretus	-	Spain (SP)	PRJEB50011	Illumina NovaSeq 6000	2*150	SPR69	Male	ERS9451534	37500000	0.9556	ERS9451642	41300000	0.9674	ERS9451751	53400000	0.9756	ERS9451858	31500000	0.8741	ERS9452054	87682910	0.9481	ERS9452759	78753050	0.9629	-	-	-	ERS9452719	49700000	0.936	-	-	-	ERS9452799	93200000	0.9718	-	-	-
Mus spretus	-	Spain (SP)	PRJEB50011	Illumina NovaSeq 6000	2*150	SPR13	Female	ERS9451517	80077330	0.9653	ERS9451625	68757620	0.9527	ERS9451734	103938300	0.9735	ERS9451841	95579350	0.9293	ERS9452001	84310560	0.9614	-	-	-	ERS9452606	77000000	0.9727	-	-	-	ERS9452217	52061180	0.9492	-	-	-	ERS9452413	96255120	0.959
Mus spretus	-	Spain (SP)	PRJEB50011	Illumina NovaSeq 6000	2*150	SPR22	Female	ERS9451518	53500470	0.9703	ERS9451626	97503910	0.968	ERS9451735	78421670	0.977	ERS9451842	87004440	0.883	ERS9452005	27060030	0.9512	-	-	-	ERS9452610	87600000	0.9676	-	-	-	ERS9452221	49366850	0.9639	-	-	-	ERS9452417	80493920	0.9629
Mus spretus	-	Spain (SP)	PRJEB50011	Illumina NovaSeq 6000	2*150	SPR30	Female	ERS9451519	95312470	0.9614	ERS9451627	73057390	0.9232	ERS9451736	71068880	0.9769	ERS9451843	75972660	0.8671	ERS9452011	57789910	0.946	-	-	-	ERS9452616	99100000	0.9596	-	-	-	ERS9452227	82272610	0.9598	-	-	-	ERS9452423	80989420	0.9603
Mus spretus	-	Spain (SP)	PRJEB50011	Illumina NovaSeq 6000	2*150	SPR36	Female	ERS9451520	71162890	0.9652	ERS9451628	77979420	0.9718	ERS9451737	107065800	0.9764	ERS9451844	100995300	0.8847	ERS9452017	71286160	0.9535	-	-	-	ERS9452622	67600000	0.9614	-	-	-	ERS9452233	72681080	0.959	-	-	-	ERS9452429	77415870	0.9461
Mus spretus	-	Spain (SP)	PRJEB50011	Illumina NovaSeq 6000	2*150	SPR39	Female	ERS9451521	79875450	0.963	ERS9451629	95525740	0.9702	ERS9451738	126664800	0.9697	ERS9451845	73077180	0.9239	ERS9452020	54481660	0.947	-	-	-	ERS9452625	136000000	0.9506	-	-	-	ERS9452236	71652690	0.9564	-	-	-	ERS9452432	94447250	0.9576
Mus spretus	-	Spain (SP)	PRJEB50011	Illumina NovaSeq 6000	2*150	SPR42	Female	ERS9451522	103909000	0.9707	ERS9451630	73943230	0.9708	ERS9451739	146822600	0.9665	ERS9451846	25723760	0.9497	ERS9452023	48626370	0.9458	-	-	-	ERS9452628	91400000	0.9598	-	-	-	ERS9452239	84099350	0.9662	-	-	-	ERS9452435	79907840	0.9657
Mus spretus	-	Spain (SP)	PRJEB50011	Illumina NovaSeq 6000	2*150	SPR46	Female	ERS9451523	89361150	0.9656	ERS9451631	95679120	0.9583	ERS9451740	86071060	0.9621	ERS9451847	6431032	0.9241	ERS9452026	71116480	0.9534	-	-	-	ERS9452631	99800000	0.9497	-	-	-	ERS9452242	87967900	0.945	-	-	-	ERS9452438	84212270	0.9625
Mus spretus	-	Spain (SP)	PRJEB50011	Illumina NovaSeq 6000	2*150	SPR72	Female	ERS9451524	52527940	0.9567	ERS9451632	78907640	0.9629	ERS9451741	56910130	0.9649	ERS9451848	72575180	0.9264	ERS9452037	107111700	0.954	-	-	-	ERS9452642	72900000	0.9564	-	-	-	ERS9452253	94865950	0.9606	-	-	-	ERS9452449	72949650	0.9607
Mus spretus	-	Spain (SP)	PRJEB50011	Illumina NovaSeq 6000	2*150	SPR74	Female	ERS9451525	61150240	0.9685	ERS9451633	75649710	0.9664	ERS9451742	122832400	0.973	ERS9451849	73897870	0.9137	ERS9452039	48879410	0.9519	-	-	-	ERS9452644	73000000	0.9663	-	-	-	ERS9452255	66617150	0.963	-	-	-	ERS9452451	32497990	0.9567

## Sheet: Data S1B
Supplementary Data S1B. Summary information of RNA-Seq data for intra-subspecies comparison analysis. These transcriptomic sequencing datasets were retrieved from Harr et al 2016 Sci Data. The mapping rate info from each RNA-seq dataset was extracted from the STAR alignment output files.
Species	Subspecies	Geographic_location	Study_accession	Sequence_Platform	Read_Length (bp)	Individual_ID	Sample_gender	Brain			Gut			Heart			Kidney			Liver			Lung			Muscle			Spleen			Thyroid			Testis
								Sample_accession	Sequenced_read_pairs(*)	Mapping rate	Sample_accession	Sequenced_read_pairs(*)	Mapping rate	Sample_accession	Sequenced_read_pairs	Mapping rate	Sample_accession	Sequenced_read_pairs	Mapping rate	Sample_accession	Sequenced_read_pairs	Mapping rate	Sample_accession	Sequenced_read_pairs	Mapping rate	Sample_accession	Sequenced_read_pairs	Mapping rate	Sample_accession	Sequenced_read_pairs	Mapping rate	Sample_accession	Sequenced_read_pairs	Mapping rate	Sample_accession	Sequenced_read_pairs	Mapping rate
Mus musculus	M.m.dom	France (FR)	PRJEB11897	Illumina HiSeq 2000	2*100	14	Male	ERS986056	24863510	0.9743	-	-	-	ERS986071	21130440	0.9751	ERS986080	27457750	0.9708	ERS986088	28896490	0.7774	ERS986097	26076530	0.9678	ERS986101	26984520	0.9669	ERS986110	24916810	0.9568	ERS986059	23395050	0.953	ERS986118	16662929	0.9799
Mus musculus	M.m.dom	France (FR)	PRJEB11897	Illumina HiSeq 2000	2*100	15b	Male	ERS986057	21659720	0.981	ERS986065	22950270	0.9727	ERS986072	28309460	0.9764	ERS986081	26800840	0.9663	ERS986090	24315200	0.8642	-	-	-	ERS986102	23352860	0.957	ERS986111	26205050	0.9596	ERS986044	21519690	0.9462	ERS985990	15249090	0.9814
Mus musculus	M.m.dom	France (FR)	PRJEB11897	Illumina HiSeq 2000	2*100	16b	Male	ERS986058	28911660	0.9793	ERS986066	21621650	0.9657	ERS986073	24953780	0.9736	ERS986082	25452310	0.9625	ERS986091	27348990	0.8399	-	-	-	ERS986103	28919850	0.9679	ERS986112	27433600	0.9646	ERS986029	23436500	0.95	ERS985991	17841214	0.9793
Mus musculus	M.m.dom	France (FR)	PRJEB11897	Illumina HiSeq 2000	2*100	18b	Male	ERS986060	29890250	0.9784	ERS986067	25451450	0.9557	ERS986075	25943140	0.9696	ERS986083	27955930	0.9708	ERS986092	27022670	0.7593	ERS986098	29008760	0.9647	ERS986105	26562830	0.9698	ERS986113	24735570	0.9583	ERS985984	21139590	0.9494	ERS986005	16066352	0.977
Mus musculus	M.m.dom	France (FR)	PRJEB11897	Illumina HiSeq 2000	2*100	B2C	Male	ERS986061	26749840	0.981	ERS986068	25289380	0.971	ERS986076	24247000	0.959	ERS986084	29772270	0.9725	ERS986093	27147800	0.813	-	-	-	ERS986106	25523640	0.968	ERS986114	27243930	0.9641	ERS985969	20352640	0.9492	ERS986119	16835895	0.9797
Mus musculus	M.m.dom	France (FR)	PRJEB11897	Illumina HiSeq 2000	2*100	C12	Male	ERS986062	28498450	0.9803	ERS986069	21624320	0.9609	ERS986077	24773230	0.9705	ERS986085	24510940	0.958	ERS986094	27565760	0.8213	ERS986099	26892510	0.9647	ERS986107	26255260	0.9677	ERS986115	24010690	0.9631	ERS985954	22560660	0.9431	ERS986104	16128822	0.9771
Mus musculus	M.m.dom	France (FR)	PRJEB11897	Illumina HiSeq 2000	2*100	E1b	Male	ERS986063	27245260	0.9839	ERS986070	26684000	0.9669	ERS986078	24905800	0.9666	ERS986086	32260580	0.9729	ERS986095	29423880	0.8827	ERS986100	26900210	0.9677	ERS986108	27917900	0.9685	ERS986116	24841660	0.9634	ERS985939	23973540	0.9467	ERS986089	16188645	0.9805
Mus musculus	M.m.dom	France (FR)	PRJEB11897	Illumina HiSeq 2000	2*100	F1B	Male	ERS986064	27721600	0.9779	-	-	-	ERS986079	30355040	0.9734	ERS986087	28907310	0.9684	ERS986096	25262970	0.864	-	-	-	ERS986109	26873580	0.9702	ERS986117	25173100	0.9627	ERS986014	34215540	0.948	ERS986074	17146138	0.9819
Mus musculus	M.m.dom	Germany (GE)	PRJEB11897	Illumina HiSeq 2000	2*100	tp1	Male	ERS985899	22099890	0.9693	ERS985907	22690790	0.9752	ERS985912	27260380	0.9686	ERS985920	25261030	0.9679	ERS985989	26387640	0.8519	ERS985997	27285820	0.9714	ERS986004	25384200	0.9797	ERS986010	29612130	0.959	ERS985937	22697400	0.9545	ERS985929	10919445	0.959
Mus musculus	M.m.dom	Germany (GE)	PRJEB11897	Illumina HiSeq 2000	2*100	tp121	Male	ERS985900	24780890	0.9667	ERS985908	25028030	0.9599	ERS985913	26006840	0.9657	ERS985921	20470710	0.9583	ERS986120	56667350	0.8638	ERS985998	29604620	0.9695	-	-	-	ERS986011	25605810	0.9633	ERS985938	20827280	0.952	ERS985930	9188862	0.9633
Mus musculus	M.m.dom	Germany (GE)	PRJEB11897	Illumina HiSeq 2000	2*100	tp172	Male	ERS985901	28154830	0.9677	-	-	-	ERS985914	24438090	0.969	ERS985922	23169650	0.9575	ERS986121	46203250	0.9545	ERS986000	29943000	0.9674	ERS986122	38271440	0.9783	ERS986012	27223940	0.9584	ERS985940	21902950	0.9464	ERS985931	9884943	0.9584
Mus musculus	M.m.dom	Germany (GE)	PRJEB11897	Illumina HiSeq 2000	2*100	tp3a2	Male	ERS985902	28228990	0.963	-	-	-	ERS985915	27354780	0.9677	ERS985923	22307580	0.9705	ERS985992	31022460	0.9196	ERS986001	29424950	0.9644	ERS986006	29473940	0.9762	ERS986013	28139870	0.9672	ERS985941	24035150	0.952	ERS985932	9643170	0.9672
Mus musculus	M.m.dom	Germany (GE)	PRJEB11897	Illumina HiSeq 2000	2*100	tp4a	Male	ERS985903	24674320	0.9688	ERS985910	22684830	0.9735	ERS985916	24738170	0.9689	ERS985985	28596300	0.9711	ERS985993	30120660	0.8577	-	-	-	ERS986007	30567980	0.9759	ERS985925	20840400	0.9573	ERS985942	19553720	0.9494	ERS985933	9679626	0.9573
Mus musculus	M.m.dom	Germany (GE)	PRJEB11897	Illumina HiSeq 2000	2*100	tp51	Male	ERS985904	28302220	0.9675	-	-	-	ERS985917	29052660	0.9723	ERS985986	29964700	0.9723	ERS985994	26276310	0.9191	ERS986002	28080550	0.9738	ERS986008	30204160	0.9774	ERS985926	19542360	0.965	ERS985999	29779620	0.9551	ERS985934	8763737	0.965
Mus musculus	M.m.dom	Germany (GE)	PRJEB11897	Illumina HiSeq 2000	2*100	tp710	Male	ERS985905	26792290	0.9612	-	-	-	ERS985918	23416940	0.9748	ERS985987	26249100	0.9701	ERS985995	27417620	0.8391	-	-	-	ERS986009	24819220	0.9764	ERS985927	17320060	0.9597	ERS985943	21820330	0.9515	ERS985935	9885580	0.9597
Mus musculus	M.m.dom	Germany (GE)	PRJEB11897	Illumina HiSeq 2000	2*100	tp81	Male	ERS985906	27324910	0.9637	ERS985911	24247670	0.9602	ERS985919	24006120	0.9707	ERS985988	30756950	0.9705	ERS985996	25941480	0.8389	ERS986003	29400950	0.9789	ERS985924	21973950	0.9686	ERS985928	18063910	0.9685	ERS985944	23119860	0.9434	ERS985936	8272166	0.9685
Mus musculus	M.m.dom	Iran (IR)	PRJEB11897	Illumina HiSeq 2000	2*100	02FC_1	Male	ERS985945	19740890	0.9692	ERS985953	17508060	0.9532	ERS985962	22580150	0.9662	ERS985971	19893190	0.9613	ERS985979	16853090	0.8496	ERS986018	23506680	0.9646	ERS986026	26130550	0.9728	ERS986034	23141460	0.964	ERS986048	24683150	0.9446	ERS986039	14837639	0.9733
Mus musculus	M.m.dom	Iran (IR)	PRJEB11897	Illumina HiSeq 2000	2*100	05F1C1	Male	ERS985946	22378460	0.9642	ERS985955	24130820	0.9581	ERS985963	21987710	0.968	ERS985972	19051820	0.9634	ERS985980	21120010	0.9266	ERS986019	24987380	0.9712	ERS986027	24403760	0.9763	-	-	-	ERS986049	28414140	0.9545	ERS986040	17275482	0.9806
Mus musculus	M.m.dom	Iran (IR)	PRJEB11897	Illumina HiSeq 2000	2*100	07F1C1	Male	ERS985947	20133970	0.9662	ERS985956	18232540	0.9517	ERS985964	18725070	0.9642	ERS985973	19766110	0.9603	ERS985981	23126420	0.9066	ERS986020	21159870	0.9712	ERS986028	25044900	0.9749	-	-	-	ERS986050	26282990	0.9485	ERS986041	17540940	0.9763
Mus musculus	M.m.dom	Iran (IR)	PRJEB11897	Illumina HiSeq 2000	2*100	08F1_A	Male	ERS985948	21155710	0.9629	ERS985957	20965070	0.9555	ERS985965	22074290	0.9618	ERS985974	20872300	0.9603	ERS985982	19927130	0.8526	ERS986021	25984580	0.9746	ERS986030	23219160	0.9777	ERS986035	22010360	0.9693	ERS986051	22873020	0.955	ERS986042	18127439	0.9691
Mus musculus	M.m.dom	Iran (IR)	PRJEB11897	Illumina HiSeq 2000	2*100	131	Male	ERS985949	17988330	0.97	ERS985958	21960770	0.949	ERS985966	22090230	0.9622	ERS985975	18406230	0.9649	ERS985983	19116370	0.8365	ERS986022	27143590	0.9694	ERS986031	28950600	0.9837	ERS986036	21876790	0.9658	ERS986052	25612940	0.9471	ERS986043	14797006	0.9815
Mus musculus	M.m.dom	Iran (IR)	PRJEB11897	Illumina HiSeq 2000	2*100	132	Male	ERS985950	21657380	0.967	ERS985959	22327780	0.9596	ERS985967	21506430	0.9658	ERS985976	17584160	0.9638	ERS986015	25345110	0.8924	ERS986023	26609730	0.9729	ERS986032	19760120	0.9776	ERS986037	17888760	0.9644	ERS986053	21563510	0.9506	ERS986045	17269311	0.9833
Mus musculus	M.m.dom	Iran (IR)	PRJEB11897	Illumina HiSeq 2000	2*100	IR121	Male	ERS985951	19033730	0.9658	ERS985960	19616780	0.9608	ERS985968	20424000	0.9659	ERS985977	20697360	0.9645	ERS986016	28614950	0.9117	ERS986024	28182670	0.9713	-	-	-	ERS985909	23380340	0.9633	ERS986054	24377160	0.9464	ERS986046	14808662	0.983
Mus musculus	M.m.dom	Iran (IR)	PRJEB11897	Illumina HiSeq 2000	2*100	IR122	Male	ERS985952	20526680	0.9656	ERS985961	23101420	0.9597	ERS985970	19316090	0.9661	ERS985978	21288680	0.9686	ERS986017	27732260	0.9221	ERS986025	23541360	0.974	ERS986033	27488840	0.9756	ERS986038	23095590	0.9693	ERS986055	30747260	0.9504	ERS986047	17194670	0.9833
