# Supplementary material for: Population level analyses reveal contrasting landscapes of gene expression divergence and evolution between male and female transcriptome lineages in the house mouse
Source: Research Square preprint supplement (doi:10.21203/rs.3.rs-6634316/v1), 2025-05-22
Supplement: Supplementary file 5 [file 46c85cce35181cb73422f07a.xlsx]

## Sheet: Data_S5
Supplementary Data S5. Statistics on the chromosomal distributions of gene categories with different expression patterns. The statistical significance (p-value) between two groups was computed using Fisher's exact test, and the signicant tests were highlighted in yellow. The symbol preceeding the p-value marks the excess pattern, i.e., "Up" and "Down" indicating the over-representation and under-…
Gene type	Tissue	DE gene pattern	Statistics on Autosomes			Statistics on chromosome X			Statistics on chromosome Y
			p-value (non-DE genes VS all DE genes)	p-value (both-sex DE genes VS sex-specific DE genes)	p-value (male-specific DE genesVS female-specific DE genes)	p-value (non-DE genes VS all DE genes)	p-value (both-sex DE genes VS sex-specific DE genes)	p-value (female-specific DE genesVS male-specific DE genes)	p-value (non-DE genes VS male-specific DE genes)
Protein-coding genes	Brain	Inter-subspecies	(Down) 1.64 x 10-23	0.95	0.56	(Up) 2.6x 10-10	0.76	0.38	(Up) 3.7 x 10-6
		Inter-species	(Down) 1.60 x 10-23	(Up) 0.05	0.46	(Up) 4.5 x 10-10	(Down) 0.09	0.58	(Up) 3.7 x 10-6
	Heart	Inter-subspecies	(Down) 7.53 x 10-25	0.5	0.59	(Up) 2.6 x 10-11	0.5	0.59	(Up) 1.8 x 10-7
		Inter-species	(Down) 2.79 x 10-20	0.67	0.22	(Up) 1.8 x 10-8	0.5	0.35	(Up) 8.4 x 10-6
	Kidney	Inter-subspecies	(Down) 6.17 x 10-31	(Up) 0.06	0.05	(Up) 2.0 x 10-15	0.1	0.09	(Up) 7.4 x 10-10
		Inter-species	(Down) 2.06 x 10-34	0.28	0.68	(Up) 1.4 x 10-16	0.4	0.45	(Up) 2.8 x 10-8
	Liver	Inter-subspecies	(Down) 1.13 x 10-21	0.17	0.39	(Up) 1.7 x 10-11	0.2	0.29	(Up) 1.2 x 10-6
		Inter-species	(Down) 2.50 x 10-23	0.21	0.69	(Up) 1.4 x 10-11	0.32	0.48	(Up) 9.2 x 10-5
	Mammary	Inter-subspecies	(Down) 1.13 x 10-21	0.47	0.12	(Up) 0.0004	0.6	0.05	(Up) 0.001
		Inter-species	(Down) 2.99 x 10-19	(Up) 0.03	0.46	(Up) 2.1 x 10-9	(Down) 0.03	0.35	(Up) 1.4 x 10-7
	Epi-Ute	Inter-subspecies	(Down) 4.49 x 10-22	0.48	0.08	(Up) 1.5 x 10-8	0.48	0.08	(Up) 1.5 x 10-32
		Inter-species	(Down) 3.03 x 10-35	(Up) 0.02	0.57	(Up) 1.0 x 10-16	(Down) 0.03	0.52	(Up) 3.3 x 10-27
	Tes-Ova	Inter-subspecies	(Down) 2.50 x 10-17	(Up) 4.6 x 10-6	0.24	(Up) 4.6 x 10-7	(Down) 4.2 x 10-5	0.63	(Up) 1.4 x 10-10
		Inter-species	(Down) 3.79 x 10-17	(Up) 0.0001	0.61	(Up) 4.6 x 10-7	(Down) 0.003	0.6	(Up) 2.1 x 10-8
	Vas-Ovi	Inter-subspecies	(Down) 2.12 x 10-37	0.2	0.48	(Up) 2.2 x 10-18	0.24	0.57	(Up) 2.8 x 10-18
		Inter-species	(Down) 1.20 x 10-32	0.1	0.45	(Up) 2.0 x 10-13	0.15	0.61	(Up) 8.7 x 10-16
lncRNA genes	Brain	Inter-subspecies	(Down) 3.66 x 10-15	(Up) 0.003	0.06	0.27	(UP) 0.003	0.06	(Up) 5.2 x 10-5
		Inter-species	(Down) 3.46 x 10-18	0.57	0.57	0.26	0.71	1	(Up) 0.0002
	Heart	Inter-subspecies	(Down) 5.08 x 10-14	0.6	1	0.51	0.41	1	(Up) 0.003
		Inter-species	(Down) 2.25 x 10-14	0.15	0.59	0.81	0.08	0.21	(Up) 0.002
	Kidney	Inter-subspecies	(Down) 6.95 x 10-16	0.68	0.35	1	0.39	0.74	(Up) 0.0002
		Inter-species	(Down) 3.70 x 10-20	1	0.51	0.84	0.7	0.73	(Up) 0.0002
	Liver	Inter-subspecies	(Down) 4.15 x 10-11	0.55	0.63	0.56	0.35	0.26	(Up) 0.007
		Inter-species	(Down) 5.34 x 10-13	0.45	0.08	1	0.61	0.25	(Up) 0.008
	Mammary	Inter-subspecies	(Down) 8.61 x 10-14	0.51	1	0.81	0.37	0.7	(Up) 0.0002
		Inter-species	(Down) 4.03 x 10-18	0.69	0.76	0.83	1	0.52	(Up) 3.43 x 10-6
	Epi-Ute	Inter-subspecies	(Down) 5.80 x 10-27	0.31	0.5	0.19	0.29	0.49	(Up) 1.23 x 10-24
		Inter-species	(Down) 7.81 x 10-29	0.72	0.83	0.93	0.58	0.65	(Up) 4.58 x 10-24
	Tes-Ova	Inter-subspecies	(Down) 2.63 x 10-55	1	(Up) 0.003	(Up) 0.02	0.81	(Down) 0.0002	(Up) 3.06 x 10-50
		Inter-species	(Down) 2.26 x 10-71	0.84	(Up) 0.0004	(Up) 0.0004	1	(Down) 1.6 x 10-5	(Up) 9.85 x 10-60
	Vas-Ovi	Inter-subspecies	(Down) 4.28 x 10-23	0.84	1	1	0.69	1	(Up) 7.67 x 10-13
		Inter-species	(Down) 7.91 x 10-29	0.25	0.51	0.86	0.18	0.36	(Up) 1.42 x 10-13
