# Supplementary material for: Population level analyses reveal contrasting landscapes of gene expression divergence and evolution between male and female transcriptome lineages in the house mouse
Source: Research Square preprint supplement (doi:10.21203/rs.3.rs-6634316/v1), 2025-05-22
Supplement: Supplementary file 6 [file 6a898cbd96427d010e96e2a6.xlsx]

## Sheet: Data S8A
Supplementary Data S8A. Full list of DE protein-coding genes for the second RNA-Seq dataset. Only the DE genes reaching statistical significance after multiple correction testing (FDR < 0.05) were retained.
Brain												Gut												Heart												Kidney												Liver
FR vs GE						FR-GE vs IR						FR vs GE						FR-GE vs IR						FR vs GE						FR-GE vs IR						FR vs GE						FR-GE vs IR						FR vs GE
Geneid	logFC	logCPM	LR	PValue	FDR	Geneid	logFC	logCPM	LR	PValue	FDR	Geneid	logFC	logCPM	LR	PValue	FDR	Geneid	logFC	logCPM	LR	PValue	FDR	Geneid	logFC	logCPM	LR	PValue	FDR	Geneid	logFC	logCPM	LR	PValue	FDR	Geneid	logFC	logCPM	LR	PValue	FDR	Geneid	logFC	logCPM	LR	PValue	FDR	Geneid	logFC
ENSMUSG00000074264	-2.55041	3.80522	293.103	1.04839e-65	1.46827e-61	ENSMUSG00000033590	-0.794579	3.40452	98.4523	3.32942e-23	4.72145e-19	ENSMUSG00000054676	3.09886	8.63733	110.992	5.94098e-26	8.05062e-22	ENSMUSG00000074445	9.88178	4.65478	257.551	5.8652e-58	7.83238e-54	ENSMUSG00000057003	5.75788	0.418664	163.407	2.03814e-37	2.5438e-33	ENSMUSG00000060311	-6.45652	0.624466	468.968	5.3738e-104	6.8618e-100	ENSMUSG00000087119	-5.33331	0.8425	236.881	1.88262e-53	2.48261e-49	ENSMUSG00000047586	6.79137	4.33106	253.733	3.98715e-57	5.31686e-53	ENSMUSG00000027762	-3.50065
ENSMUSG00000044894	0.413027	6.1897	94.7597	2.14957e-22	1.50524e-18	ENSMUSG00000068617	1.25601	2.5182	80.512	2.88947e-19	2.04878e-15	ENSMUSG00000087119	-7.35616	0.642636	93.2552	4.59687e-22	3.11461e-18	ENSMUSG00000060311	-5.70689	1.02124	176.092	3.45733e-40	2.30846e-36	ENSMUSG00000087119	-4.62747	0.446902	147.758	5.35809e-34	3.34372e-30	ENSMUSG00000036925	-5.04003	1.08394	162.594	3.06903e-37	1.95942e-33	ENSMUSG00000095677	3.0977	0.674234	98.6506	3.01223e-23	1.98611e-19	ENSMUSG00000054871	-1.70263	3.5224	131.006	2.46897e-30	1.64619e-26	ENSMUSG00000029228	-4.21553
ENSMUSG00000045128	0.327498	6.89523	66.3572	3.76187e-16	1.75616e-12	ENSMUSG00000028657	0.434283	6.91571	75.8114	3.12098e-18	1.47529e-14	ENSMUSG00000026818	-7.64417	2.39895	68.4913	1.27442e-16	5.75654e-13	ENSMUSG00000070390	3.73659	2.82653	129.503	5.26273e-30	2.34262e-26	ENSMUSG00000074264	-1.82712	3.02734	93.9006	3.31769e-22	1.38027e-18	ENSMUSG00000064156	-4.47534	0.167215	125.434	4.08963e-29	1.74068e-25	ENSMUSG00000029369	-1.57966	5.90219	89.2141	3.54319e-21	1.55747e-17	ENSMUSG00000074445	5.31619	0.630506	89.2698	3.44484e-21	1.53123e-17	ENSMUSG00000001774	-0.81212
ENSMUSG00000027981	-0.623369	4.32426	65.2417	6.62528e-16	2.31968e-12	ENSMUSG00000022194	-0.44023	6.22146	64.2714	1.08407e-15	3.84331e-12	ENSMUSG00000073125	-3.67359	0.742416	51.461	7.30319e-13	2.47414e-09	ENSMUSG00000064156	-5.37318	1.03164	104.436	1.62329e-24	5.41935e-21	ENSMUSG00000091405	-3.3172	1.0878	79.9953	3.75295e-19	1.17101e-15	ENSMUSG00000056666	-2.92317	7.03114	81.8418	1.47427e-19	4.70623e-16	ENSMUSG00000079037	-1.36673	7.72051	86.8819	1.152e-20	3.38478e-17	ENSMUSG00000096852	-5.28839	8.6441	82.266	1.18954e-19	3.96562e-16	ENSMUSG00000030707	1.38613
ENSMUSG00000030647	0.395623	6.10961	62.3321	2.90163e-15	8.12746e-12	ENSMUSG00000056666	-2.34073	5.19788	61.0353	5.60598e-15	1.58997e-11	ENSMUSG00000046230	-0.82324	5.84958	44.6258	2.38522e-11	6.46441e-08	ENSMUSG00000036925	-5.42497	1.58126	102.847	3.6211e-24	9.67123e-21	ENSMUSG00000024766	-1.60896	3.38835	73.7977	8.6547e-18	2.16039e-14	ENSMUSG00000020256	-2.6716	3.59253	78.5987	7.60979e-19	1.94339e-15	ENSMUSG00000067212	1.31429	5.05949	86.6683	1.28338e-20	3.38478e-17	ENSMUSG00000049971	-1.35732	4.90893	72.7543	1.4684e-17	3.91623e-14	ENSMUSG00000091405	-3.13704
ENSMUSG00000073664	-0.863647	5.01598	60.1112	8.96472e-15	2.09252e-11	ENSMUSG00000044519	-1.19783	2.59249	56.1152	6.83466e-14	1.61537e-10	ENSMUSG00000091405	-3.3272	1.67	41.0831	1.45891e-10	3.29495e-07	ENSMUSG00000028972	-5.27446	0.62419	98.5925	3.10196e-23	6.90393e-20	ENSMUSG00000001774	-0.906721	5.59287	67.2075	2.44377e-16	5.08346e-13	ENSMUSG00000068823	0.564848	9.3546	75.8137	3.11735e-18	6.63425e-15	ENSMUSG00000034006	-1.21504	6.29922	83.7599	5.58671e-20	1.22787e-16	ENSMUSG00000011382	-1.26207	5.13726	68.8435	1.06593e-16	2.36903e-13	ENSMUSG00000019997	-2.14328
ENSMUSG00000022708	-0.641124	6.73698	59.2591	1.38221e-14	2.7654e-11	ENSMUSG00000030890	-0.967474	1.45266	55.2639	1.05389e-13	2.13502e-10	ENSMUSG00000095677	3.25518	1.36046	39.834	2.76488e-10	5.35242e-07	ENSMUSG00000029919	2.4745	3.94042	83.7	5.75848e-20	1.09855e-16	ENSMUSG00000023034	-2.73006	5.71181	64.9268	7.77312e-16	1.34183e-12	ENSMUSG00000051154	0.963772	5.5366	67.0793	2.60799e-16	4.75735e-13	ENSMUSG00000024966	-0.672006	6.51555	72.5848	1.6001e-17	3.01437e-14	ENSMUSG00000037280	-2.99766	1.12921	58.4991	2.03385e-14	3.87449e-11	ENSMUSG00000032080	2.60698
ENSMUSG00000007836	0.352449	7.82855	58.9891	1.58547e-14	2.77557e-11	ENSMUSG00000021519	-0.484719	3.87941	53.6232	2.42874e-13	4.30525e-10	ENSMUSG00000037216	1.81957	2.33884	36.0229	1.95011e-09	3.30324e-06	ENSMUSG00000026246	4.84693	0.701701	67.4023	2.21393e-16	3.69561e-13	ENSMUSG00000031647	-0.870899	4.50363	64.7275	8.60082e-16	1.34183e-12	ENSMUSG00000022820	0.525979	5.70494	65.8775	4.79836e-16	7.65878e-13	ENSMUSG00000008348	-1.38646	6.59282	70.9782	3.61186e-17	5.95371e-14	ENSMUSG00000017707	0.627363	8.79176	54.8035	1.332e-13	2.22028e-10	ENSMUSG00000066361	-1.72319
ENSMUSG00000025825	0.347458	6.29456	57.5917	3.22577e-14	4.96507e-11	ENSMUSG00000031672	0.45649	7.4381	52.818	3.65934e-13	5.7659e-10	ENSMUSG00000021120	-1.43975	3.72221	35.068	3.18396e-09	4.79399e-06	ENSMUSG00000032425	2.21046	4.33903	56.0621	7.0216e-14	1.04185e-10	ENSMUSG00000007836	0.472779	7.26489	62.5543	2.59195e-15	3.59445e-12	ENSMUSG00000035268	0.671906	7.38164	64.7743	8.39874e-16	1.19159e-12	ENSMUSG00000026701	-0.755656	7.87447	65.4455	5.97447e-16	8.75393e-13	ENSMUSG00000027907	1.26839	5.46337	53.8268	2.18963e-13	2.79749e-10	ENSMUSG00000032115	-0.80017
ENSMUSG00000028842	-0.552498	5.92116	57.406	3.54521e-14	4.96507e-11	ENSMUSG00000011256	-0.584916	4.76971	50.7318	1.05889e-12	1.50161e-09	ENSMUSG00000054417	2.62783	1.43813	33.7301	6.33133e-09	8.57959e-06	ENSMUSG00000095041	-1.42973	7.75966	53.5646	2.50231e-13	3.34159e-10	ENSMUSG00000007279	1.05689	4.14825	55.9428	7.46092e-14	9.31198e-11	ENSMUSG00000028657	0.659776	6.28752	64.2687	1.08555e-15	1.38613e-12	ENSMUSG00000019970	-1.8099	7.17647	64.7531	8.4895e-16	1.11951e-12	ENSMUSG00000040717	-0.645258	4.18838	53.7452	2.28255e-13	2.79749e-10	ENSMUSG00000021928	0.834573
ENSMUSG00000045555	1.60071	0.840577	56.9904	4.37938e-14	5.57574e-11	ENSMUSG00000079429	-1.68841	2.13949	50.3811	1.2661e-12	1.61035e-09	ENSMUSG00000004032	-1.05089	4.50901	32.7776	1.03329e-08	1.27292e-05	ENSMUSG00000054474	-1.60813	5.29736	53.1055	3.161e-13	3.83745e-10	ENSMUSG00000006715	-0.911042	4.58668	54.6993	1.4046e-13	1.59371e-10	ENSMUSG00000049940	-0.650287	6.21014	63.3058	1.76984e-15	2.05446e-12	ENSMUSG00000055401	0.730888	4.13911	63.8354	1.35258e-15	1.6215e-12	ENSMUSG00000028064	0.71884	7.2889	53.7237	2.30764e-13	2.79749e-10	ENSMUSG00000050323	-0.822482
ENSMUSG00000062647	0.499425	7.25899	54.9138	1.25934e-13	1.46976e-10	ENSMUSG00000039218	-0.376163	9.75257	50.1894	1.396e-12	1.61035e-09	ENSMUSG00000033902	-1.27187	4.70862	31.9944	1.54616e-08	1.746e-05	ENSMUSG00000049971	-1.94011	2.66469	50.7921	1.02686e-12	1.14272e-09	ENSMUSG00000004032	-0.47841	5.36215	54.055	1.94953e-13	2.02767e-10	ENSMUSG00000031382	1.14047	6.64774	62.7945	2.29437e-15	2.4414e-12	ENSMUSG00000052336	1.64289	2.46388	61.8505	3.70541e-15	4.07194e-12	ENSMUSG00000084174	5.5234	0.260593	53.1284	3.12448e-13	3.47208e-10	ENSMUSG00000029657	-1.8054
ENSMUSG00000075296	-2.20102	2.42855	52.968	3.39028e-13	3.65238e-10	ENSMUSG00000042156	-0.381405	6.39185	50.0797	1.47624e-12	1.61035e-09	ENSMUSG00000027843	-1.58732	4.53935	30.6919	3.0242e-08	3.15238e-05	ENSMUSG00000061292	-4.30284	5.16807	48.2898	3.67662e-12	3.72185e-09	ENSMUSG00000049038	-0.835481	3.77744	53.6955	2.34096e-13	2.2475e-10	ENSMUSG00000027940	-0.90439	5.51937	60.9476	5.86147e-15	5.75731e-12	ENSMUSG00000024942	0.629095	5.44063	61.437	4.57142e-15	4.63718e-12	ENSMUSG00000057411	0.775477	4.69688	52.9107	3.49069e-13	3.58064e-10	ENSMUSG00000034429	0.942838
ENSMUSG00000067212	1.53177	2.29106	52.7687	3.75235e-13	3.75369e-10	ENSMUSG00000028378	-1.62917	0.957474	49.5139	1.96973e-12	1.98826e-09	ENSMUSG00000015806	-0.970216	6.11765	29.8436	4.68334e-08	4.53314e-05	ENSMUSG00000027907	1.48312	5.43527	48.1732	3.9019e-12	3.72185e-09	ENSMUSG00000023176	1.54122	3.14482	52.8105	3.67339e-13	3.27483e-10	ENSMUSG00000029516	-1.93461	3.15261	56.3944	5.92983e-14	5.40843e-11	ENSMUSG00000005621	-0.521617	6.08355	56.8631	4.67227e-14	4.40095e-11	ENSMUSG00000056666	-1.475	7.56359	52.2515	4.8829e-13	4.65096e-10	ENSMUSG00000078689	-4.81938
ENSMUSG00000059146	-0.423938	7.49741	50.7122	1.06953e-12	9.98586e-10	ENSMUSG00000068823	0.289893	7.92062	49.3854	2.10308e-12	1.98826e-09	ENSMUSG00000005447	0.84602	5.07252	29.0879	6.91676e-08	6.2486e-05	ENSMUSG00000044783	-1.43757	7.82162	47.4499	5.64266e-12	5.02347e-09	ENSMUSG00000027981	-0.917517	3.65565	52.3668	4.60454e-13	3.83129e-10	ENSMUSG00000032643	-0.980177	3.89245	54.0292	1.97531e-13	1.68151e-10	ENSMUSG00000003316	-0.661563	8.51378	55.7016	8.43491e-14	7.41541e-11	ENSMUSG00000024575	-1.751	4.83605	51.1254	8.66497e-13	7.70316e-10	ENSMUSG00000066357	0.767396
ENSMUSG00000019970	-1.12502	6.50989	49.4605	2.02404e-12	1.77167e-09	ENSMUSG00000095041	-1.87816	7.92952	48.6393	3.07645e-12	2.72669e-09	ENSMUSG00000038141	0.892647	5.33634	27.1359	1.89639e-07	0.000160613	ENSMUSG00000026470	1.82109	6.38567	46.1895	1.07349e-11	8.9596e-09	ENSMUSG00000046667	-1.02819	2.61246	51.682	6.52571e-13	5.09046e-10	ENSMUSG00000027792	0.976215	5.48841	47.603	5.21894e-12	4.16504e-09	ENSMUSG00000028527	-1.03523	9.4183	52.0034	5.5405e-13	4.53279e-10	ENSMUSG00000024940	-0.67564	5.74198	50.9504	9.47291e-13	7.89508e-10	ENSMUSG00000072849	-3.50641
ENSMUSG00000011171	0.836173	2.57157	47.9973	4.26803e-12	3.5161e-09	ENSMUSG00000029213	0.548568	5.16001	48.3709	3.5277e-12	2.94273e-09	ENSMUSG00000029499	1.59671	1.27917	26.3798	2.80457e-07	0.000218326	ENSMUSG00000019966	0.708696	5.81742	42.7001	6.38106e-11	5.01251e-08	ENSMUSG00000021270	-0.965756	7.02188	50.9636	9.40966e-13	6.90835e-10	ENSMUSG00000029836	0.560114	4.6485	47.4315	5.69597e-12	4.27835e-09	ENSMUSG00000055150	1.5397	0.927178	51.8989	5.84344e-13	4.53279e-10	ENSMUSG00000078161	-2.64529	1.60296	49.8095	1.69423e-12	1.32897e-09	ENSMUSG00000011960	-0.66132
ENSMUSG00000048581	0.800964	3.02826	47.8334	4.64019e-12	3.61033e-09	ENSMUSG00000040913	-0.439967	4.34666	48.1237	4.00167e-12	3.15265e-09	ENSMUSG00000033213	-1.14709	5.02362	26.2842	2.94687e-07	0.000218326	ENSMUSG00000029445	2.51385	2.19225	42.118	8.59291e-11	6.37498e-08	ENSMUSG00000028410	-1.34551	6.21817	50.0501	1.49872e-12	1.03919e-09	ENSMUSG00000023473	1.80928	1.41041	46.3461	9.91058e-12	6.89152e-09	ENSMUSG00000023944	-0.494727	10.215	51.5104	7.12191e-13	5.21759e-10	ENSMUSG00000053303	1.64618	5.46107	49.5939	1.89098e-12	1.39494e-09	ENSMUSG00000070305	-1.08188
ENSMUSG00000040383	-0.411687	5.37142	46.9503	7.28105e-12	5.3669e-09	ENSMUSG00000066613	1.15617	2.64127	47.8812	4.52853e-12	3.37995e-09	ENSMUSG00000113255	-2.00816	1.3413	26.2107	3.06117e-07	0.000218326	ENSMUSG00000033444	0.693982	7.39453	40.3432	2.13043e-10	1.49736e-07	ENSMUSG00000036617	0.504517	6.47936	49.3999	2.08761e-12	1.37134e-09	ENSMUSG00000062647	0.618573	7.8906	46.2792	1.02544e-11	6.89152e-09	ENSMUSG00000001493	0.99671	2.33721	51.4012	7.52937e-13	5.22578e-10	ENSMUSG00000075044	3.33686	2.57706	49.486	1.9979e-12	1.39494e-09	ENSMUSG00000099032	4.50249
ENSMUSG00000048279	-0.465916	6.84188	46.7897	7.90257e-12	5.53377e-09	ENSMUSG00000029439	-0.340759	6.76371	47.7514	4.83841e-12	3.43067e-09	ENSMUSG00000026414	1.2743	1.7691	25.8839	3.62573e-07	0.000245661	ENSMUSG00000026944	-1.78197	6.13983	39.9725	2.57558e-10	1.71971e-07	ENSMUSG00000046470	0.869122	5.47981	49.1496	2.37165e-12	1.48003e-09	ENSMUSG00000022678	0.424128	5.38245	45.798	1.31095e-11	8.36979e-09	ENSMUSG00000113902	-0.562001	5.36098	51.2598	8.09138e-13	5.33505e-10	ENSMUSG00000051154	0.465094	6.09879	49.3956	2.09215e-12	1.39494e-09	ENSMUSG00000000440	1.89596
ENSMUSG00000043165	0.672144	3.95821	46.1096	1.1182e-11	7.45732e-09	ENSMUSG00000024442	-0.424531	5.82114	46.1478	1.09658e-11	7.32268e-09	ENSMUSG00000017418	-1.27338	5.55799	25.6066	4.18607e-07	0.000270121	ENSMUSG00000073409	3.73645	1.50052	39.1684	3.88784e-10	2.4723e-07	ENSMUSG00000090877	-4.48398	4.30188	48.6127	3.11846e-12	1.8534e-09	ENSMUSG00000044573	0.576134	3.88105	43.8916	3.47084e-11	2.05322e-08	ENSMUSG00000045930	1.15102	3.24972	50.8532	9.95378e-13	6.07875e-10	ENSMUSG00000029213	0.473722	5.2043	48.1591	3.92999e-12	2.49554e-09	ENSMUSG00000024937	0.81464
ENSMUSG00000091405	-2.38459	2.22065	45.8077	1.30448e-11	8.3042e-09	ENSMUSG00000036880	0.605392	4.42625	46.0786	1.13602e-11	7.32268e-09	ENSMUSG00000052794	1.28305	1.83743	24.9076	6.01461e-07	0.000370473	ENSMUSG00000056666	-2.77856	9.51991	37.4236	9.50658e-10	5.7705e-07	ENSMUSG00000019763	0.83271	4.96443	47.9712	4.32529e-12	2.45382e-09	ENSMUSG00000031458	0.529876	3.65545	43.8543	3.53754e-11	2.05322e-08	ENSMUSG00000110221	-1.35767	2.44519	50.8166	1.01412e-12	6.07875e-10	ENSMUSG00000062647	0.716683	8.0059	47.4116	5.75408e-12	3.48776e-09	ENSMUSG00000067212	1.31548
ENSMUSG00000038880	0.493409	4.16094	45.173	1.80373e-11	1.09831e-08	ENSMUSG00000031382	1.40528	1.13624	43.9837	3.31116e-11	2.04154e-08	ENSMUSG00000002289	-2.42553	5.88818	24.1048	9.12322e-07	0.000537516	ENSMUSG00000022587	-1.97277	6.84212	37.0527	1.14976e-09	6.67563e-07	ENSMUSG00000091971	-5.22687	3.17757	47.8462	4.61008e-12	2.50167e-09	ENSMUSG00000028910	0.656274	4.52646	42.706	6.3618e-11	3.42651e-08	ENSMUSG00000028073	-0.848598	5.9574	50.0441	1.50331e-12	8.61922e-10	ENSMUSG00000028657	0.429918	6.84557	46.7248	8.16876e-12	4.73611e-09	ENSMUSG00000026786	2.06868
ENSMUSG00000096014	0.409866	4.98819	44.6712	2.33063e-11	1.36002e-08	ENSMUSG00000074627	-1.32323	0.724695	43.2303	4.86601e-11	2.8752e-08	ENSMUSG00000054000	1.17825	2.10821	23.4821	1.26079e-06	0.000711874	ENSMUSG00000046613	-1.04491	2.13668	36.85	1.27574e-09	7.09842e-07	ENSMUSG00000028034	-0.526413	5.9009	46.9628	7.23456e-12	3.76227e-09	ENSMUSG00000095041	-1.38674	5.54536	42.682	6.4403e-11	3.42651e-08	ENSMUSG00000041193	1.94585	3.58566	48.9354	2.64532e-12	1.45349e-09	ENSMUSG00000022587	-1.18263	6.5521	45.9472	1.21486e-11	6.75009e-09	ENSMUSG00000020593	-3.09657
ENSMUSG00000049086	0.55282	3.40297	44.3865	2.69542e-11	1.49985e-08	ENSMUSG00000038517	-0.35846	6.64726	42.9453	5.6293e-11	3.19317e-08	ENSMUSG00000075420	1.07478	3.78158	23.3653	1.33977e-06	0.000719829	ENSMUSG00000019998	0.548174	6.66197	35.567	2.46425e-09	1.31631e-06	ENSMUSG00000058927	-2.47617	1.55902	46.6455	8.50633e-12	4.2467e-09	ENSMUSG00000023267	2.19339	0.904985	40.3578	2.11455e-10	1.08003e-07	ENSMUSG00000037458	-0.560418	7.19666	46.3556	9.86266e-12	5.20235e-09	ENSMUSG00000068823	0.382671	8.08168	45.7706	1.32944e-11	7.09124e-09	ENSMUSG00000021589	-0.782363
ENSMUSG00000004035	-1.2855	4.77561	44.3229	2.78444e-11	1.49985e-08	ENSMUSG00000027940	-0.522511	6.43965	42.2266	8.12861e-11	4.43353e-08	ENSMUSG00000073664	-0.635649	5.82627	23.2524	1.42074e-06	0.000719829	ENSMUSG00000051817	-0.788914	3.14222	35.4357	2.63609e-09	1.35394e-06	ENSMUSG00000022893	-1.08671	5.53105	46.5186	9.07544e-12	4.35656e-09	ENSMUSG00000040112	0.370657	6.20858	39.2915	3.65024e-10	1.79269e-07	ENSMUSG00000024399	1.61126	0.679129	45.5633	1.47784e-11	7.49548e-09	ENSMUSG00000027940	-0.657626	6.35216	45.3891	1.61529e-11	8.28458e-09	ENSMUSG00000051747	-2.90229
ENSMUSG00000026879	-0.592529	6.34766	43.9716	3.33176e-11	1.7282e-08	ENSMUSG00000040424	1.12934	5.56808	41.4744	1.19424e-10	6.27243e-08	ENSMUSG00000028470	0.683763	4.67751	23.2342	1.43424e-06	0.000719829	ENSMUSG00000031633	0.950195	6.32591	35.0718	3.17769e-09	1.54653e-06	ENSMUSG00000037720	-0.504829	5.40036	46.3384	9.94927e-12	4.59914e-09	ENSMUSG00000032537	0.942827	5.65621	39.0299	4.1736e-10	1.9738e-07	ENSMUSG00000036896	1.08383	2.97319	45.3042	1.68686e-11	8.23874e-09	ENSMUSG00000042453	-1.50214	2.88265	45.2298	1.75218e-11	8.65383e-09	ENSMUSG00000024430	-1.50093
ENSMUSG00000043872	-0.615157	3.67356	43.8738	3.50248e-11	1.75187e-08	ENSMUSG00000030409	-0.713823	5.04527	40.8718	1.62551e-10	8.23263e-08	ENSMUSG00000015659	-0.975065	2.91637	22.936	1.67486e-06	0.000810573	ENSMUSG00000038141	1.21329	4.91682	35.0324	3.24269e-09	1.54653e-06	ENSMUSG00000043099	0.667257	4.61438	46.1279	1.1078e-11	4.938e-09	ENSMUSG00000028990	-0.504759	5.33482	37.8577	7.60986e-10	3.47037e-07	ENSMUSG00000028710	0.598996	4.92139	44.9647	2.00621e-11	9.44854e-09	ENSMUSG00000005364	-2.78897	2.44077	44.5445	2.48635e-11	1.18412e-08	ENSMUSG00000027199	0.834423
ENSMUSG00000055633	0.488247	4.06721	43.7151	3.79835e-11	1.8037e-08	ENSMUSG00000116895	-1.76001	-0.0732534	40.2642	2.21833e-10	1.08477e-07	ENSMUSG00000023571	1.47248	5.48351	22.4799	2.12354e-06	0.000992281	ENSMUSG00000028601	-0.697644	4.71347	33.0156	9.14218e-09	4.20982e-06	ENSMUSG00000040350	1.19117	3.95413	46.0501	1.15268e-11	4.96091e-09	ENSMUSG00000066613	2.1252	0.368121	37.0166	1.17125e-09	5.09638e-07	ENSMUSG00000036887	0.930355	3.55523	44.8918	2.08231e-11	9.46877e-09	ENSMUSG00000021591	1.01298	5.48751	44.1251	3.08043e-11	1.41647e-08	ENSMUSG00000024810	-2.04256
ENSMUSG00000016756	2.50444	1.65301	43.6817	3.8637e-11	1.8037e-08	ENSMUSG00000051550	-0.465295	4.94084	40.1702	2.32767e-10	1.10029e-07	ENSMUSG00000062647	0.765827	8.69213	22.1997	2.45714e-06	0.00110989	ENSMUSG00000022244	-0.722709	4.67423	32.1955	1.39415e-08	6.20582e-06	ENSMUSG00000067212	1.47208	4.18823	45.9453	1.21603e-11	5.05909e-09	ENSMUSG00000034533	1.91006	1.99527	36.9103	1.23689e-09	5.09638e-07	ENSMUSG00000005107	-1.43936	5.53591	43.5348	4.16477e-11	1.83069e-08	ENSMUSG00000095041	-1.34813	6.87173	42.4184	7.3692e-11	3.27561e-08	ENSMUSG00000074623	-2.85029
ENSMUSG00000019158	0.423295	4.54762	42.2749	7.93037e-11	3.58274e-08	ENSMUSG00000059326	-0.577912	5.2782	39.0702	4.08845e-10	1.87027e-07	ENSMUSG00000033857	1.0735	4.52074	21.9896	2.74131e-06	0.00119831	ENSMUSG00000042460	0.666859	6.11067	31.9473	1.58415e-08	6.82409e-06	ENSMUSG00000007379	0.996382	2.46685	45.7731	1.32774e-11	5.34563e-09	ENSMUSG00000060212	-2.66829	0.745599	36.9097	1.23728e-09	5.09638e-07	ENSMUSG00000014550	-0.755713	5.5778	43.3234	4.64005e-11	1.97382e-08	ENSMUSG00000022821	0.572239	8.45929	42.2203	8.15496e-11	3.50795e-08	ENSMUSG00000030207	-0.750117
ENSMUSG00000026556	0.475649	4.95699	42.0191	9.03883e-11	3.9559e-08	ENSMUSG00000043962	-0.220682	7.11361	38.8777	4.51213e-10	1.98476e-07	ENSMUSG00000026227	0.790614	4.18153	21.8627	2.92876e-06	0.00124024	ENSMUSG00000018661	-0.710835	5.60798	31.4919	2.00269e-08	8.35749e-06	ENSMUSG00000020108	-1.30975	5.77323	45.1922	1.78615e-11	6.96655e-09	ENSMUSG00000040612	-1.28663	2.40345	36.7912	1.31484e-09	5.24661e-07	ENSMUSG00000029447	-0.409149	7.62948	43.1482	5.07457e-11	2.06626e-08	ENSMUSG00000035268	0.705649	5.32141	42.0837	8.74486e-11	3.64415e-08	ENSMUSG00000004098	4.11505
ENSMUSG00000066151	-0.284572	5.77631	41.3581	1.26745e-10	5.25448e-08	ENSMUSG00000043411	-0.286077	7.3883	38.8321	4.61865e-10	1.98476e-07	ENSMUSG00000029390	0.834535	5.85084	21.5925	3.37167e-06	0.00138453	ENSMUSG00000038843	1.15141	2.60351	31.3904	2.11027e-08	8.53954e-06	ENSMUSG00000021094	0.720602	5.01134	45.1123	1.86057e-11	7.03692e-09	ENSMUSG00000038583	0.55387	10.6253	36.5088	1.51982e-09	5.88078e-07	ENSMUSG00000048581	0.760034	3.28984	43.1115	5.17075e-11	2.06626e-08	ENSMUSG00000073409	3.78158	0.990924	41.0492	1.48443e-10	5.99844e-08	ENSMUSG00000025877	1.22211
ENSMUSG00000060802	0.563072	5.09891	41.3455	1.27563e-10	5.25448e-08	ENSMUSG00000015224	0.592268	4.50332	38.0977	6.72882e-10	2.80651e-07	ENSMUSG00000038143	-1.38363	3.55398	21.4162	3.69627e-06	0.00147318	ENSMUSG00000027165	1.00572	2.33099	30.7299	2.96553e-08	1.16476e-05	ENSMUSG00000033054	-0.567829	4.05572	44.9415	2.03008e-11	7.4522e-09	ENSMUSG00000029213	0.573427	4.85208	36.262	1.72498e-09	6.4783e-07	ENSMUSG00000020038	-1.67898	2.25881	43.033	5.38231e-11	2.08754e-08	ENSMUSG00000025576	-1.65983	0.489051	40.969	1.54663e-10	6.06596e-08	ENSMUSG00000005107	-0.939323
ENSMUSG00000031760	0.485741	7.12345	41.167	1.39763e-10	5.53542e-08	ENSMUSG00000020740	-0.482065	6.83304	37.8775	7.53296e-10	3.05214e-07	ENSMUSG00000023087	-1.41216	6.55827	21.1865	4.16694e-06	0.00161332	ENSMUSG00000079429	-1.48243	4.70952	30.5896	3.18801e-08	1.21636e-05	ENSMUSG00000034522	0.910127	4.82118	44.3293	2.77533e-11	9.89682e-09	ENSMUSG00000034586	-0.955906	2.85978	35.6963	2.30599e-09	8.41291e-07	ENSMUSG00000039936	1.15577	2.65379	41.6669	1.08226e-10	4.07766e-08	ENSMUSG00000041881	0.373018	6.27139	38.4371	5.65477e-10	2.14652e-07	ENSMUSG00000021772	0.572332
ENSMUSG00000030432	0.259177	7.11386	41.132	1.42289e-10	5.53542e-08	ENSMUSG00000080316	-0.613841	5.6223	37.5154	9.06958e-10	3.55896e-07	ENSMUSG00000032239	0.66445	5.02478	20.8077	5.07775e-06	0.00186574	ENSMUSG00000020607	1.09232	6.34429	30.3722	3.56596e-08	1.28869e-05	ENSMUSG00000059796	-0.388232	7.18311	43.9335	3.39725e-11	1.17781e-08	ENSMUSG00000092416	1.57362	3.33462	35.4953	2.55671e-09	9.0685e-07	ENSMUSG00000029657	-1.17029	7.32747	40.3044	2.17323e-10	7.96067e-08	ENSMUSG00000059406	-2.45159	3.07721	38.3893	5.79488e-10	2.14652e-07	ENSMUSG00000023087	-4.22853
ENSMUSG00000060212	-0.324112	7.00004	40.898	1.60386e-10	6.07081e-08	ENSMUSG00000042249	-0.31423	7.16419	37.4694	9.28578e-10	3.55896e-07	ENSMUSG00000030532	1.24648	3.27613	20.8015	5.09425e-06	0.00186574	ENSMUSG00000004451	0.580888	6.07621	30.3697	3.57059e-08	1.28869e-05	ENSMUSG00000001891	-0.628178	7.95246	43.6191	3.98928e-11	1.31689e-08	ENSMUSG00000002428	0.55071	4.28151	35.4156	2.6635e-09	9.19197e-07	ENSMUSG00000025347	-0.65698	7.8042	40.1895	2.30489e-10	8.21476e-08	ENSMUSG00000022026	-1.34927	4.53559	38.1307	6.61619e-10	2.38451e-07	ENSMUSG00000042510	-2.44907
ENSMUSG00000021250	-2.26009	4.53214	40.4426	2.02483e-10	7.316e-08	ENSMUSG00000022545	-0.305363	5.01448	37.398	9.63202e-10	3.59452e-07	ENSMUSG00000001774	-0.916391	5.88864	20.5491	5.81212e-06	0.00207263	ENSMUSG00000032315	-4.07735	5.52775	29.8845	4.58576e-08	1.61153e-05	ENSMUSG00000063558	-1.37397	6.23343	43.6092	4.00945e-11	1.31689e-08	ENSMUSG00000029402	0.828015	3.82346	35.0025	3.29283e-09	1.10648e-06	ENSMUSG00000052974	2.75813	1.94936	40.1272	2.37957e-10	8.25775e-08	ENSMUSG00000046330	0.614925	6.75049	38.008	7.04569e-10	2.47248e-07	ENSMUSG00000047045	1.0633
ENSMUSG00000036814	0.684348	4.16834	40.4306	2.0373e-10	7.316e-08	ENSMUSG00000002428	0.411442	4.65762	37.327	9.9892e-10	3.63223e-07	ENSMUSG00000051390	0.648361	5.32909	20.4782	6.03143e-06	0.00209569	ENSMUSG00000025396	-1.75383	7.39445	29.8178	4.7462e-08	1.62515e-05	ENSMUSG00000053907	-0.754816	7.63286	42.8132	6.02233e-11	1.9273e-08	ENSMUSG00000042793	-1.08141	4.42037	34.9119	3.44974e-09	1.12948e-06	ENSMUSG00000047861	-0.531349	4.84434	39.0237	4.18689e-10	1.38361e-07	ENSMUSG00000002668	0.639766	3.64444	37.6172	8.60806e-10	2.9433e-07	ENSMUSG00000030830	1.27246
ENSMUSG00000047843	0.446264	4.89863	40.3352	2.13925e-10	7.49003e-08	ENSMUSG00000068917	-0.34856	5.35574	37.1584	1.08912e-09	3.86122e-07	ENSMUSG00000060336	-3.42385	1.8415	20.3324	6.50884e-06	0.00220503	ENSMUSG00000066613	1.55437	0.7237	29.5454	5.4622e-08	1.82356e-05	ENSMUSG00000040136	0.501803	6.22535	42.7198	6.31696e-11	1.97105e-08	ENSMUSG00000040687	-0.638923	4.08172	34.7943	3.66437e-09	1.16976e-06	ENSMUSG00000038298	-0.511313	9.73441	39.0191	4.19688e-10	1.38361e-07	ENSMUSG00000029223	2.56477	2.32585	37.4964	9.15805e-10	3.05307e-07	ENSMUSG00000031431	-1.63746
ENSMUSG00000033701	0.402349	5.69056	40.1641	2.33505e-10	7.97617e-08	ENSMUSG00000067158	-1.01578	1.62228	36.6517	1.41239e-09	4.88516e-07	ENSMUSG00000029657	-1.808	6.19914	20.2724	6.71611e-06	0.00221976	ENSMUSG00000032226	0.882611	6.6651	28.7606	8.18995e-08	2.66753e-05	ENSMUSG00000040794	1.38389	1.93211	42.2982	7.8364e-11	2.38552e-08	ENSMUSG00000002688	-0.709235	3.09642	34.5132	4.23362e-09	1.31851e-06	ENSMUSG00000091405	-2.28547	0.720181	38.7227	4.88495e-10	1.54864e-07	ENSMUSG00000029084	0.702199	3.11226	37.4453	9.40117e-10	3.05767e-07	ENSMUSG00000033917	-1.10305
ENSMUSG00000037868	-2.6585	2.98557	38.9816	4.27814e-10	1.42655e-07	ENSMUSG00000039834	-0.338933	5.11985	36.2874	1.7026e-09	5.74871e-07	ENSMUSG00000085957	1.64747	1.35123	20.129	7.23893e-06	0.00233559	ENSMUSG00000067370	-0.653421	4.29253	28.1939	1.09752e-07	3.48958e-05	ENSMUSG00000024042	-1.10156	6.06418	42.1989	8.24446e-11	2.40906e-08	ENSMUSG00000073409	3.88093	0.500219	34.4534	4.36576e-09	1.32729e-06	ENSMUSG00000030707	1.00341	3.28474	38.6797	4.99383e-10	1.54864e-07	ENSMUSG00000028494	1.43167	5.93721	36.7499	1.34298e-09	4.26395e-07	ENSMUSG00000024561	-1.50618
ENSMUSG00000005628	-1.77692	0.351831	38.4059	5.74582e-10	1.8714e-07	ENSMUSG00000073889	0.892355	4.16094	36.0691	1.90438e-09	6.28048e-07	ENSMUSG00000091764	-1.72758	1.57666	19.941	7.98703e-06	0.00247055	ENSMUSG00000031007	0.657282	6.83953	28.0692	1.17053e-07	3.63517e-05	ENSMUSG00000042895	-0.875389	5.64482	42.1859	8.29978e-11	2.40906e-08	ENSMUSG00000046351	0.51765	4.10927	34.2441	4.86143e-09	1.44362e-06	ENSMUSG00000024766	-2.07426	4.26244	38.6579	5.04978e-10	1.54864e-07	ENSMUSG00000066512	-2.62251	2.30092	36.3265	1.6688e-09	5.17521e-07	ENSMUSG00000026390	3.17943
ENSMUSG00000033826	1.65353	1.50358	38.3456	5.92625e-10	1.8863e-07	ENSMUSG00000071054	-0.251833	7.41085	35.8725	2.10663e-09	6.78957e-07	ENSMUSG00000057342	0.780562	6.73122	19.9327	8.02186e-06	0.00247055	ENSMUSG00000028017	-1.4019	1.20652	27.9881	1.22063e-07	3.68106e-05	ENSMUSG00000041193	1.56886	4.82659	41.9139	9.53804e-11	2.66201e-08	ENSMUSG00000024537	0.43088	4.51403	34.1016	5.23079e-09	1.5031e-06	ENSMUSG00000051615	0.56656	4.39277	38.6025	5.19535e-10	1.55707e-07	ENSMUSG00000026944	-0.537114	7.14318	35.7181	2.28034e-09	6.83597e-07	ENSMUSG00000024737	1.68562
ENSMUSG00000054640	-0.489945	7.72057	38.2536	6.21218e-10	1.93337e-07	ENSMUSG00000040721	-0.401107	6.67832	35.7153	2.28359e-09	7.19634e-07	ENSMUSG00000023232	0.747096	6.31475	19.8831	8.23238e-06	0.00247904	ENSMUSG00000032513	-0.700487	5.07555	27.957	1.24044e-07	3.68106e-05	ENSMUSG00000038894	-1.89441	5.18485	41.9017	9.59781e-11	2.66201e-08	ENSMUSG00000028089	0.597545	4.30589	34.0771	5.29716e-09	1.5031e-06	ENSMUSG00000024357	0.741961	5.32108	38.4281	5.68087e-10	1.66475e-07	ENSMUSG00000066613	1.32329	1.32368	35.6956	2.30685e-09	6.83597e-07	ENSMUSG00000034116	1.35066
ENSMUSG00000029710	0.627432	3.26975	38.0422	6.92316e-10	2.1078e-07	ENSMUSG00000078867	-2.07718	0.942715	35.5168	2.52861e-09	7.79526e-07	ENSMUSG00000016344	0.757262	5.53785	19.835	8.44219e-06	0.00248696	ENSMUSG00000041638	-0.476995	6.37311	27.6033	1.48926e-07	4.32339e-05	ENSMUSG00000020326	-0.642267	9.72327	41.8524	9.84324e-11	2.67073e-08	ENSMUSG00000004032	0.757101	5.17312	33.2643	8.04478e-09	2.23313e-06	ENSMUSG00000030364	3.3521	4.74727	38.1629	6.50773e-10	1.8656e-07	ENSMUSG00000057132	-1.38492	1.31374	35.5498	2.48612e-09	7.20704e-07	ENSMUSG00000022971	0.58162
ENSMUSG00000027297	0.486465	4.24329	37.9178	7.37889e-10	2.19875e-07	ENSMUSG00000034681	-0.287055	5.70927	35.4025	2.68148e-09	8.09064e-07	ENSMUSG00000019970	-2.22723	8.53605	19.6116	9.48921e-06	0.00273592	ENSMUSG00000032038	-5.53172	6.7131	27.2629	1.77589e-07	5.04581e-05	ENSMUSG00000022865	-0.681531	5.54731	41.6461	1.09386e-10	2.90478e-08	ENSMUSG00000028247	0.436222	5.65457	32.799	1.02196e-08	2.77647e-06	ENSMUSG00000091649	1.7057	0.449152	37.735	8.10362e-10	2.27367e-07	ENSMUSG00000071178	1.52018	3.18523	35.0439	3.22352e-09	9.14589e-07	ENSMUSG00000021824	-0.793299
ENSMUSG00000035898	-0.433872	4.81902	37.7969	7.85048e-10	2.2445e-07	ENSMUSG00000022544	-0.843249	2.37255	35.3246	2.79081e-09	8.2451e-07	ENSMUSG00000038224	1.7391	0.447857	19.3292	1.10012e-05	0.00310577	ENSMUSG00000040829	-0.857891	2.31946	26.9167	2.12411e-07	5.90946e-05	ENSMUSG00000071302	-0.683855	4.29753	41.4492	1.20971e-10	3.1455e-08	ENSMUSG00000064181	0.58632	6.06664	32.731	1.05833e-08	2.81539e-06	ENSMUSG00000006930	1.50604	2.90402	37.1155	1.11337e-09	3.05874e-07	ENSMUSG00000072662	-1.73185	3.64077	34.9593	3.36676e-09	9.35329e-07	ENSMUSG00000049940	0.614298
ENSMUSG00000022537	0.648276	5.72943	37.7963	7.85293e-10	2.2445e-07	ENSMUSG00000042625	-0.396127	6.90785	34.895	3.47977e-09	1.00707e-06	ENSMUSG00000045868	-4.99061	3.19692	19.0814	1.2526e-05	0.00346407	ENSMUSG00000079299	3.28189	2.97089	26.6372	2.45467e-07	6.65732e-05	ENSMUSG00000032265	-1.00229	4.82882	41.3905	1.24661e-10	3.1753e-08	ENSMUSG00000068452	-1.26981	0.807087	32.6831	1.08475e-08	2.82677e-06	ENSMUSG00000034744	0.505502	5.27081	37.0466	1.15342e-09	3.10412e-07	ENSMUSG00000053693	-1.39531	0.523777	34.7893	3.67391e-09	9.99828e-07	ENSMUSG00000055435	0.563062
ENSMUSG00000032115	-0.289054	7.18759	37.7215	8.15982e-10	2.27804e-07	ENSMUSG00000060216	-0.274841	5.53462	34.8228	3.6112e-09	1.02421e-06	ENSMUSG00000030431	0.690515	5.35241	19.0244	1.29055e-05	0.00349764	ENSMUSG00000029720	-0.922835	1.84674	26.6076	2.49263e-07	6.65732e-05	ENSMUSG00000026672	-0.72872	6.9106	41.3253	1.28889e-10	3.21733e-08	ENSMUSG00000022309	0.994646	5.8806	32.5009	1.19136e-08	3.0425e-06	ENSMUSG00000026784	-0.60442	4.90004	37.0029	1.17951e-09	3.11085e-07	ENSMUSG00000041040	0.523951	5.38993	34.5676	4.11704e-09	1.09801e-06	ENSMUSG00000004032	-0.851883
ENSMUSG00000020212	-0.618312	3.01244	37.6882	8.3005e-10	2.27804e-07	ENSMUSG00000023764	-0.434369	5.08996	34.6513	3.94381e-09	1.09661e-06	ENSMUSG00000045193	0.739011	5.42087	18.7923	1.45754e-05	0.00387277	ENSMUSG00000032666	0.74432	4.92519	26.5585	2.55678e-07	6.69474e-05	ENSMUSG00000052748	-0.850012	3.25747	41.1891	1.38189e-10	3.34113e-08	ENSMUSG00000019945	0.979853	4.2484	31.9141	1.61147e-08	4.02455e-06	ENSMUSG00000030357	-0.483262	8.14806	36.7339	1.35403e-09	3.50109e-07	ENSMUSG00000040537	-0.742869	2.84734	33.5886	6.80914e-09	1.78039e-06	ENSMUSG00000029136	-0.790067
ENSMUSG00000058006	-0.401691	6.31248	37.6515	8.45825e-10	2.27804e-07	ENSMUSG00000039410	1.04369	4.21153	34.4487	4.37634e-09	1.15666e-06	ENSMUSG00000070661	0.793794	6.09074	18.3715	1.81755e-05	0.00473647	ENSMUSG00000092416	1.06572	3.18603	25.7059	3.97601e-07	0.000102107	ENSMUSG00000019916	-0.661382	5.97884	41.1748	1.39202e-10	3.34113e-08	ENSMUSG00000049985	-1.51832	0.401485	31.8812	1.63894e-08	4.02455e-06	ENSMUSG00000071647	0.34831	5.38602	36.5084	1.52013e-09	3.81876e-07	ENSMUSG00000025610	1.10319	5.52428	33.0298	9.07556e-09	2.32736e-06	ENSMUSG00000004552	2.85063
ENSMUSG00000022602	-2.1297	7.15733	37.5353	8.97741e-10	2.37168e-07	ENSMUSG00000028603	0.386502	6.15336	34.4431	4.38893e-09	1.15666e-06	ENSMUSG00000038880	0.720605	4.38568	18.2224	1.96555e-05	0.00502551	ENSMUSG00000054091	-0.579534	5.98255	25.5913	4.21936e-07	0.000105026	ENSMUSG00000045237	-0.662899	3.41313	41.0141	1.51132e-10	3.53242e-08	ENSMUSG00000054203	-2.04801	0.84165	31.7437	1.75919e-08	4.23833e-06	ENSMUSG00000096727	0.841191	2.55506	36.4641	1.55503e-09	3.81876e-07	ENSMUSG00000078867	-2.10844	-0.0124039	32.9593	9.41088e-09	2.36781e-06	ENSMUSG00000032786	-2.14154
ENSMUSG00000040794	0.405235	7.3882	37.4993	9.14463e-10	2.37168e-07	ENSMUSG00000022476	0.464912	5.24686	34.4362	4.40447e-09	1.15666e-06	ENSMUSG00000052595	-0.690377	6.50265	18.1294	2.06389e-05	0.00517921	ENSMUSG00000030228	2.57663	1.15301	25.5787	4.24699e-07	0.000105026	ENSMUSG00000028173	-0.567931	5.87486	40.9923	1.52833e-10	3.53242e-08	ENSMUSG00000064341	0.574329	14.0046	31.684	1.8141e-08	4.28966e-06	ENSMUSG00000089678	0.636856	6.52519	36.4532	1.56376e-09	3.81876e-07	ENSMUSG00000022817	-0.453082	7.53218	32.9186	9.60987e-09	2.3731e-06	ENSMUSG00000028655	-2.7329
ENSMUSG00000021730	-0.332259	6.51575	37.191	1.07106e-09	2.7273e-07	ENSMUSG00000075232	0.393883	5.57638	34.2595	4.82318e-09	1.24359e-06	ENSMUSG00000025958	-0.532698	5.68298	17.695	2.59312e-05	0.00638898	ENSMUSG00000026484	0.60017	4.3419	25.523	4.37147e-07	0.000106139	ENSMUSG00000028035	-0.868399	6.86527	40.6409	1.82935e-10	4.15128e-08	ENSMUSG00000091537	0.349793	5.31642	31.6305	1.86475e-08	4.32927e-06	ENSMUSG00000030870	-0.44657	6.09106	36.4072	1.60109e-09	3.83884e-07	ENSMUSG00000045629	0.728218	6.15844	32.0297	1.51831e-08	3.68121e-06	ENSMUSG00000040006	-0.789321
ENSMUSG00000053560	-0.761248	3.25331	37.0528	1.1497e-09	2.87529e-07	ENSMUSG00000053137	-0.382242	5.43435	34.1502	5.1018e-09	1.29194e-06	ENSMUSG00000038524	0.796439	2.72186	17.5393	2.81435e-05	0.00681023	ENSMUSG00000005198	-0.478798	7.80767	25.232	5.08309e-07	0.000121213	ENSMUSG00000028341	-3.3012	4.29204	40.3066	2.1707e-10	4.83794e-08	ENSMUSG00000043811	2.21084	2.65024	30.84	2.80199e-08	6.38903e-06	ENSMUSG00000000673	-0.485841	7.58505	35.9798	1.99372e-09	4.69485e-07	ENSMUSG00000028125	-0.823733	4.83554	31.939	1.59093e-08	3.7884e-06	ENSMUSG00000028573	-0.768193
ENSMUSG00000071076	0.375958	6.50685	36.7709	1.32861e-09	3.26443e-07	ENSMUSG00000051166	-0.413286	7.02889	33.9701	5.59646e-09	1.39234e-06	ENSMUSG00000019158	0.880129	4.64082	17.3212	3.15652e-05	0.0075042	ENSMUSG00000091476	-2.11182	2.02076	25.1092	5.41739e-07	0.000122925	ENSMUSG00000041798	-3.01761	2.67905	39.7426	2.89729e-10	6.34406e-08	ENSMUSG00000025766	0.85354	4.00894	30.6944	3.02041e-08	6.76626e-06	ENSMUSG00000063704	0.753992	4.56649	35.883	2.09529e-09	4.7965e-07	ENSMUSG00000025144	0.47054	5.50854	31.8303	1.68244e-08	3.93603e-06	ENSMUSG00000037031	0.845633
ENSMUSG00000001774	-0.464064	6.00592	36.0554	1.91786e-09	4.63098e-07	ENSMUSG00000063511	-0.426803	8.93113	33.7152	6.37988e-09	1.53414e-06	ENSMUSG00000028034	-0.597516	6.27664	17.1906	3.38098e-05	0.00789925	ENSMUSG00000006019	-0.545449	4.12741	25.1064	5.42526e-07	0.000122925	ENSMUSG00000024357	0.659301	3.82184	39.0446	4.14238e-10	8.91397e-08	ENSMUSG00000020961	-1.29114	2.84304	30.5548	3.24561e-08	7.14539e-06	ENSMUSG00000038642	1.11291	2.88957	35.8697	2.10963e-09	4.7965e-07	ENSMUSG00000035916	3.20717	3.61986	31.5707	1.92311e-08	4.42149e-06	ENSMUSG00000090210	-1.76315
ENSMUSG00000008683	-0.407683	6.72735	35.6279	2.3884e-09	5.66941e-07	ENSMUSG00000020743	-0.57313	4.33987	33.7144	6.38278e-09	1.53414e-06	ENSMUSG00000030423	0.820144	4.14845	17.1233	3.503e-05	0.00804562	ENSMUSG00000071180	0.628034	5.71395	25.1044	5.43102e-07	0.000122925	ENSMUSG00000051495	-0.55818	6.60554	38.9369	4.37723e-10	9.2597e-08	ENSMUSG00000058486	-0.435796	4.16007	30.403	3.50993e-08	7.4762e-06	ENSMUSG00000033715	-1.164	9.11092	35.8301	2.15291e-09	4.81194e-07	ENSMUSG00000004035	-1.50288	4.2486	31.3358	2.17038e-08	4.90544e-06	ENSMUSG00000057069	-0.972785
ENSMUSG00000020308	0.321795	5.63146	35.5117	2.53522e-09	5.91762e-07	ENSMUSG00000078185	0.398937	4.10762	33.2917	7.93201e-09	1.87393e-06	ENSMUSG00000074194	-1.47611	3.50943	17.0393	3.66136e-05	0.00826919	ENSMUSG00000003308	-0.471829	6.02659	24.6132	7.00707e-07	0.000155954	ENSMUSG00000029657	-1.12223	6.49785	38.8449	4.58862e-10	9.5451e-08	ENSMUSG00000004267	-0.917462	2.59118	30.4013	3.51298e-08	7.4762e-06	ENSMUSG00000028150	-0.825817	5.47971	35.7743	2.21552e-09	4.86934e-07	ENSMUSG00000022445	3.18169	6.34031	31.1667	2.36788e-08	5.26262e-06	ENSMUSG00000033715	-0.786463
ENSMUSG00000044927	0.6015	4.87829	35.4311	2.64239e-09	6.06667e-07	ENSMUSG00000024501	0.249214	6.33303	33.2604	8.06078e-09	1.87393e-06	ENSMUSG00000020307	0.484395	5.7362	16.8156	4.11938e-05	0.0091511	ENSMUSG00000040365	-0.427849	5.78483	24.5723	7.15727e-07	0.000156686	ENSMUSG00000074221	-0.827002	4.89115	38.3496	5.91394e-10	1.20739e-07	ENSMUSG00000044349	-3.08513	3.45337	30.3524	3.60266e-08	7.54137e-06	ENSMUSG00000001774	-0.752825	5.67145	35.5689	2.46184e-09	5.32202e-07	ENSMUSG00000024158	0.474024	7.91291	31.054	2.50954e-08	5.48603e-06	ENSMUSG00000024357	0.683854
ENSMUSG00000047888	-0.474377	7.12232	35.2411	2.91304e-09	6.58018e-07	ENSMUSG00000093803	-0.37569	5.86109	33.0528	8.96909e-09	2.04079e-06	ENSMUSG00000049882	0.857152	3.53808	16.7538	4.2558e-05	0.00930167	ENSMUSG00000054752	0.663357	4.14932	24.2138	8.62125e-07	0.000185691	ENSMUSG00000054580	-0.975755	3.52923	38.3222	5.99777e-10	1.20739e-07	ENSMUSG00000019782	0.468353	4.68176	30.1507	3.9975e-08	8.23292e-06	ENSMUSG00000021270	-0.648125	8.22389	35.1731	3.01669e-09	6.41631e-07	ENSMUSG00000026893	-0.580791	4.2077	30.9872	2.5974e-08	5.5865e-06	ENSMUSG00000024855	1.1749
ENSMUSG00000067825	-0.405396	4.69494	35.1661	3.02743e-09	6.73003e-07	ENSMUSG00000024942	-0.358309	4.99041	33.0277	9.08555e-09	2.04079e-06	ENSMUSG00000090877	-2.77984	3.88809	16.7175	4.33787e-05	0.00933054	ENSMUSG00000034681	-0.554003	4.58924	24.0717	9.28144e-07	0.000196737	ENSMUSG00000018678	0.521068	4.50186	37.9006	7.44427e-10	1.47479e-07	ENSMUSG00000038141	1.48281	3.41532	30.0202	4.27562e-08	8.66593e-06	ENSMUSG00000031816	0.518722	4.16988	35.1326	3.07998e-09	6.44694e-07	ENSMUSG00000058589	-2.36287	2.85133	30.4911	3.3541e-08	7.06363e-06	ENSMUSG00000046404	-1.29036
ENSMUSG00000042256	-1.02785	1.96179	34.8629	3.53758e-09	7.74123e-07	ENSMUSG00000027971	0.437146	4.32362	33.0012	9.21024e-09	2.04079e-06	ENSMUSG00000020108	-0.743894	5.27495	16.6678	4.45309e-05	0.00942873	ENSMUSG00000029213	0.668798	4.46893	24.0398	9.43645e-07	0.000196897	ENSMUSG00000066705	1.08151	4.67834	37.6771	8.34775e-10	1.60384e-07	ENSMUSG00000028261	0.507381	6.09214	29.6632	5.14015e-08	1.02554e-05	ENSMUSG00000028459	1.41246	1.68051	35.0167	3.26885e-09	6.73537e-07	ENSMUSG00000060703	0.778512	5.32847	30.4703	3.39012e-08	7.06363e-06	ENSMUSG00000050423	-3.85241
ENSMUSG00000006542	-2.48894	1.0588	34.3977	4.49265e-09	9.67994e-07	ENSMUSG00000020758	-0.611128	5.06438	32.6549	1.1006e-08	2.40117e-06	ENSMUSG00000046822	0.476984	5.18344	16.2834	5.45383e-05	0.01137	ENSMUSG00000116138	-0.575269	4.20498	23.8206	1.05743e-06	0.000217245	ENSMUSG00000025538	0.812552	3.05404	37.676	8.35265e-10	1.60384e-07	ENSMUSG00000036208	-0.767427	2.93373	29.2598	6.32939e-08	1.24216e-05	ENSMUSG00000019916	-0.567084	6.00915	34.9337	3.41119e-09	6.88708e-07	ENSMUSG00000004610	0.398993	5.49689	30.2985	3.70416e-08	7.59923e-06	ENSMUSG00000032698	0.985385
ENSMUSG00000058546	0.292115	5.57617	34.3212	4.67252e-09	9.91495e-07	ENSMUSG00000002625	-0.383204	7.43398	32.5014	1.19104e-08	2.52002e-06	ENSMUSG00000071637	-1.2586	4.82115	16.2125	5.6618e-05	0.0116247	ENSMUSG00000061589	-0.4118	6.95177	23.2308	1.43676e-06	0.000288772	ENSMUSG00000021431	-0.48757	4.61479	37.2722	1.02741e-09	1.92533e-07	ENSMUSG00000051000	-0.455368	6.10006	29.2322	6.42043e-08	1.24216e-05	ENSMUSG00000001750	0.504022	4.99402	34.9134	3.44693e-09	6.88708e-07	ENSMUSG00000010663	0.635072	7.42366	29.7266	4.97466e-08	1.00511e-05	ENSMUSG00000022885	0.700875
ENSMUSG00000037843	0.370218	6.81729	34.1179	5.1871e-09	1.08426e-06	ENSMUSG00000092416	1.3083	4.0913	32.483	1.20239e-08	2.52002e-06	ENSMUSG00000024357	0.815391	3.85188	16.1672	5.79901e-05	0.011653	ENSMUSG00000038599	-0.854914	3.83413	23.2147	1.44883e-06	0.000288772	ENSMUSG00000003617	-0.85599	7.16159	37.2605	1.03355e-09	1.92533e-07	ENSMUSG00000022476	2.20855	4.65194	29.0406	7.08767e-08	1.35078e-05	ENSMUSG00000040557	-0.844905	5.72009	34.5788	4.09343e-09	7.98909e-07	ENSMUSG00000067369	0.638214	5.44149	29.6558	5.15973e-08	1.02089e-05	ENSMUSG00000057425	-1.57257
ENSMUSG00000029390	0.579899	4.28928	33.8656	5.90528e-09	1.21623e-06	ENSMUSG00000003665	-0.730025	1.85596	32.4733	1.20839e-08	2.52002e-06	ENSMUSG00000027827	-1.47038	0.752627	16.0854	6.0549e-05	0.011653	ENSMUSG00000034645	-1.77002	1.60165	23.0697	1.56234e-06	0.00030526	ENSMUSG00000063694	-0.432605	8.9757	37.1695	1.08296e-09	1.9877e-07	ENSMUSG00000030979	0.463873	4.77011	28.6907	8.49125e-08	1.59448e-05	ENSMUSG00000027597	-0.632012	7.26227	34.5664	4.11965e-09	7.98909e-07	ENSMUSG00000033533	-1.2574	8.86987	29.6386	5.2059e-08	1.02089e-05	ENSMUSG00000018899	0.805551
ENSMUSG00000040055	-0.368595	5.70099	33.6019	6.76253e-09	1.3726e-06	ENSMUSG00000056228	-0.450167	3.85655	32.3644	1.27804e-08	2.62664e-06	ENSMUSG00000048047	-0.579591	4.82721	16.0837	6.06026e-05	0.011653	ENSMUSG00000093445	-1.27043	0.946311	23.0453	1.58225e-06	0.00030526	ENSMUSG00000040250	-0.445999	4.83267	37.0246	1.16649e-09	2.11e-07	ENSMUSG00000006221	-0.328587	11.4233	28.6184	8.81388e-08	1.63108e-05	ENSMUSG00000046879	1.2375	4.48357	33.9174	5.75016e-09	1.09895e-06	ENSMUSG00000024953	0.391361	10.2867	29.5431	5.46865e-08	1.05688e-05	ENSMUSG00000015854	1.15293
ENSMUSG00000036372	0.440663	4.05867	33.4722	7.22889e-09	1.44629e-06	ENSMUSG00000019945	1.18131	1.23384	32.1267	1.44437e-08	2.92608e-06	ENSMUSG00000037416	-0.517086	5.83598	16.0791	6.07524e-05	0.011653	ENSMUSG00000042099	-0.916316	2.59662	23.0237	1.60013e-06	0.00030526	ENSMUSG00000056216	-0.428279	4.8262	36.8328	1.28704e-09	2.29479e-07	ENSMUSG00000028961	-0.403021	5.38382	28.3872	9.93219e-08	1.81177e-05	ENSMUSG00000044641	-0.450368	6.43922	33.6111	6.73082e-09	1.26799e-06	ENSMUSG00000020740	-0.689426	5.14524	29.4662	5.68992e-08	1.08393e-05	ENSMUSG00000037458	-0.877503
ENSMUSG00000096054	-0.422689	9.35727	33.4127	7.45363e-09	1.47026e-06	ENSMUSG00000043323	-0.269082	6.53776	31.8051	1.70445e-08	3.40435e-06	ENSMUSG00000028070	0.60215	4.85348	16.0696	6.10552e-05	0.011653	ENSMUSG00000029098	-0.542967	6.30567	22.7179	1.87615e-06	0.000346249	ENSMUSG00000066278	0.691568	4.15726	36.7014	1.37682e-09	2.4203e-07	ENSMUSG00000026307	0.426339	4.63408	28.3434	1.01593e-07	1.8271e-05	ENSMUSG00000029390	0.687373	5.42703	33.576	6.85318e-09	1.27286e-06	ENSMUSG00000022829	-0.873258	3.0732	29.4227	5.81929e-08	1.09296e-05	ENSMUSG00000052748	-0.678254
ENSMUSG00000025142	0.309705	5.08161	32.85	9.95533e-09	1.93645e-06	ENSMUSG00000042647	0.964826	1.65555	31.6309	1.86439e-08	3.67206e-06	ENSMUSG00000031534	0.686222	3.66249	15.9235	6.59561e-05	0.0124135	ENSMUSG00000042208	0.767658	2.98505	22.6929	1.9007e-06	0.000346249	ENSMUSG00000029330	-1.07985	4.22961	36.6664	1.40176e-09	2.42991e-07	ENSMUSG00000029001	-1.53267	2.23225	28.2659	1.05743e-07	1.87531e-05	ENSMUSG00000060032	0.606205	6.51341	33.5049	7.10833e-09	1.2905e-06	ENSMUSG00000054204	2.89013	1.41108	29.374	5.96715e-08	1.10517e-05	ENSMUSG00000066278	0.712415
ENSMUSG00000038900	0.690035	6.71716	32.5845	1.14122e-08	2.18942e-06	ENSMUSG00000035112	-0.615447	3.12346	31.5422	1.95152e-08	3.79102e-06	ENSMUSG00000043866	0.493818	5.82309	15.8416	6.88721e-05	0.0127847	ENSMUSG00000022604	0.732188	2.21236	22.673	1.92049e-06	0.000346249	ENSMUSG00000005483	-1.55239	5.0211	36.337	1.6598e-09	2.8378e-07	ENSMUSG00000022019	0.573462	4.80288	28.2091	1.08891e-07	1.90469e-05	ENSMUSG00000029470	0.373194	5.85147	33.4952	7.1439e-09	1.2905e-06	ENSMUSG00000047502	-0.761911	4.40742	29.339	6.07617e-08	1.10994e-05	ENSMUSG00000022772	-0.555876
ENSMUSG00000027574	0.558304	4.23213	32.3549	1.28432e-08	2.43065e-06	ENSMUSG00000031754	0.24358	5.536	31.5092	1.98493e-08	3.80382e-06	ENSMUSG00000091971	-2.86502	2.14566	15.7997	7.04142e-05	0.0128164	ENSMUSG00000035208	2.28535	0.793171	22.667	1.92649e-06	0.000346249	ENSMUSG00000027088	-0.478405	4.6501	36.2827	1.70676e-09	2.87363e-07	ENSMUSG00000055493	0.46193	5.42636	28.1657	1.11358e-07	1.92153e-05	ENSMUSG00000007836	0.406413	7.31449	33.221	8.22562e-09	1.46583e-06	ENSMUSG00000040706	-1.49624	4.43706	29.0513	7.04872e-08	1.2702e-05	ENSMUSG00000028211	-1.23127
ENSMUSG00000038538	-0.424024	6.13942	32.2766	1.33712e-08	2.49685e-06	ENSMUSG00000011751	-0.287556	8.62469	31.2444	2.27497e-08	4.30152e-06	ENSMUSG00000020961	0.669087	5.40696	15.7858	7.09345e-05	0.0128164	ENSMUSG00000041058	0.637935	4.94589	22.649	1.94464e-06	0.000346249	ENSMUSG00000044786	-0.729426	5.13037	36.2384	1.74596e-09	2.87363e-07	ENSMUSG00000021591	0.787253	4.50229	27.5767	1.50987e-07	2.52086e-05	ENSMUSG00000029516	1.70232	3.31341	33.1383	8.58312e-09	1.50914e-06	ENSMUSG00000064310	2.07657	2.35865	28.9567	7.40155e-08	1.316e-05	ENSMUSG00000028410	-0.795459
ENSMUSG00000021967	0.380494	4.68857	32.1114	1.45583e-08	2.68275e-06	ENSMUSG00000039765	0.587519	5.00195	30.7782	2.89268e-08	5.39751e-06	ENSMUSG00000058927	-3.08065	0.266776	15.7539	7.21376e-05	0.0128623	ENSMUSG00000031982	-0.820316	2.56198	22.5626	2.03407e-06	0.000349387	ENSMUSG00000031703	-0.484815	5.89539	36.2341	1.74983e-09	2.87363e-07	ENSMUSG00000017754	-0.850617	5.38616	27.5746	1.5115e-07	2.52086e-05	ENSMUSG00000118662	0.61177	4.44976	32.942	9.4948e-09	1.63661e-06	ENSMUSG00000021710	0.432849	5.32292	28.9201	7.54254e-08	1.32342e-05	ENSMUSG00000029417	2.02199
ENSMUSG00000052584	0.296705	5.65831	32.0099	1.53392e-08	2.78309e-06	ENSMUSG00000022994	-0.24269	6.14271	30.5918	3.1843e-08	5.86449e-06	ENSMUSG00000067925	1.12416	1.96425	15.6239	7.72705e-05	0.0135986	ENSMUSG00000075520	0.888399	7.26738	22.561	2.03577e-06	0.000349387	ENSMUSG00000036138	0.510612	5.88478	35.6165	2.40238e-09	3.87464e-07	ENSMUSG00000029723	-0.513997	7.9187	27.5636	1.52014e-07	2.52086e-05	ENSMUSG00000090877	-2.17704	5.46145	32.9295	9.55629e-09	1.63661e-06	ENSMUSG00000052087	-1.51344	3.19908	28.489	9.42344e-08	1.63197e-05	ENSMUSG00000087141	-0.912599
ENSMUSG00000021303	0.734645	5.86496	31.9896	1.55003e-08	2.78309e-06	ENSMUSG00000047909	-0.40669	5.38056	30.566	3.22698e-08	5.86691e-06	ENSMUSG00000017291	-0.563499	6.69608	15.4905	8.292e-05	0.0144058	ENSMUSG00000007603	-0.445845	5.21567	22.5563	2.04075e-06	0.000349387	ENSMUSG00000038403	0.554416	8.05418	35.6011	2.42145e-09	3.87464e-07	ENSMUSG00000019889	0.624836	5.22398	27.4901	1.579e-07	2.58491e-05	ENSMUSG00000059555	0.685687	4.21885	32.8632	9.88784e-09	1.67168e-06	ENSMUSG00000026188	1.7619	3.16541	28.3942	9.89637e-08	1.6919e-05	ENSMUSG00000026490	-0.58882
ENSMUSG00000061601	-0.376325	8.16215	31.919	1.6074e-08	2.84957e-06	ENSMUSG00000038141	1.28586	5.25805	30.4844	3.36565e-08	5.97094e-06	ENSMUSG00000029199	0.519695	4.87078	15.3709	8.83398e-05	0.0151531	ENSMUSG00000027239	-2.43162	3.27966	22.1862	2.47446e-06	0.000418278	ENSMUSG00000056025	-2.1797	0.803077	35.546	2.49104e-09	3.93552e-07	ENSMUSG00000029502	0.276732	6.30536	27.4511	1.61117e-07	2.60418e-05	ENSMUSG00000035615	1.05201	1.48317	32.7091	1.07036e-08	1.78669e-06	ENSMUSG00000027967	-1.66862	3.10027	28.2285	1.07804e-07	1.8197e-05	ENSMUSG00000079263	-2.24156
ENSMUSG00000004263	0.357246	4.45834	31.733	1.76888e-08	3.09665e-06	ENSMUSG00000041975	-0.495148	3.38491	30.4828	3.36842e-08	5.97094e-06	ENSMUSG00000007989	-1.34834	0.810502	15.2288	9.52397e-05	0.0161324	ENSMUSG00000035545	-0.617395	7.73614	22.0695	2.62957e-06	0.000438942	ENSMUSG00000069917	-3.43096	4.67828	35.3659	2.73224e-09	4.26264e-07	ENSMUSG00000023963	0.698905	2.89645	27.2762	1.76367e-07	2.81504e-05	ENSMUSG00000020609	-2.98312	7.62443	32.6144	1.12378e-08	1.85241e-06	ENSMUSG00000001313	0.797287	3.63256	28.2027	1.09254e-07	1.82113e-05	ENSMUSG00000026042	2.33447
ENSMUSG00000045903	-1.09316	3.80316	31.69	1.80853e-08	3.12697e-06	ENSMUSG00000043463	0.33733	4.94412	30.4585	3.41084e-08	5.9715e-06	ENSMUSG00000029725	0.746051	4.07322	15.1934	9.70397e-05	0.0161331	ENSMUSG00000042275	-0.64695	2.88997	21.7817	3.05501e-06	0.000493433	ENSMUSG00000029392	-0.615647	7.50621	35.0417	3.22716e-09	4.97262e-07	ENSMUSG00000015290	0.311059	6.5577	27.2273	1.80887e-07	2.84685e-05	ENSMUSG00000032115	-0.594586	6.95223	32.4783	1.2053e-08	1.95673e-06	ENSMUSG00000024127	-0.437387	7.45217	28.024	1.1982e-07	1.97259e-05	ENSMUSG00000033543	-0.477926
ENSMUSG00000046229	0.419054	4.61582	31.5599	1.93381e-08	3.30281e-06	ENSMUSG00000063415	-0.487022	4.31556	30.3574	3.5934e-08	6.21439e-06	ENSMUSG00000024766	-1.94839	3.45449	15.1821	9.76247e-05	0.0161331	ENSMUSG00000062980	0.636362	4.68944	21.779	3.05931e-06	0.000493433	ENSMUSG00000021327	-0.615926	5.86272	34.9499	3.383e-09	5.14917e-07	ENSMUSG00000031286	-0.835762	2.18197	27.2068	1.82819e-07	2.84685e-05	ENSMUSG00000028195	-1.05678	4.58483	32.46	1.21674e-08	1.95673e-06	ENSMUSG00000032265	-0.704414	4.05283	27.7737	1.36365e-07	2.21759e-05	ENSMUSG00000019659	0.509552
ENSMUSG00000060032	0.393886	4.8275	31.4826	2.01238e-08	3.39559e-06	ENSMUSG00000074129	-0.37504	4.38726	30.1437	4.01189e-08	6.85454e-06	ENSMUSG00000110185	-0.691003	4.53287	15.1104	0.000101402	0.0164909	ENSMUSG00000024614	0.603213	5.07049	21.7743	3.06687e-06	0.000493433	ENSMUSG00000032377	-0.669686	4.33773	34.4804	4.30572e-09	6.47466e-07	ENSMUSG00000026535	1.76218	2.50877	26.9854	2.04995e-07	3.15371e-05	ENSMUSG00000022537	1.27083	2.48184	32.3134	1.31203e-08	2.08017e-06	ENSMUSG00000038677	-1.13242	3.10372	27.5522	1.52909e-07	2.4498e-05	ENSMUSG00000053907	-0.66599
ENSMUSG00000019054	0.228503	6.49971	31.2252	2.29758e-08	3.83067e-06	ENSMUSG00000034449	-0.697545	2.99633	30.0468	4.21736e-08	7.1198e-06	ENSMUSG00000031431	-1.32404	6.77442	15.0952	0.000102224	0.0164909	ENSMUSG00000020151	1.04056	6.26609	21.6081	3.34433e-06	0.000531668	ENSMUSG00000029994	-0.732631	5.03471	34.1598	5.07681e-09	7.5433e-07	ENSMUSG00000026158	0.736197	4.71966	26.952	2.08569e-07	3.17049e-05	ENSMUSG00000044249	-1.93223	4.0217	32.2942	1.32505e-08	2.08017e-06	ENSMUSG00000040433	-0.399407	5.76804	27.5345	1.54318e-07	2.4498e-05	ENSMUSG00000031628	-0.67636
ENSMUSG00000074656	0.278981	5.65275	31.1347	2.40732e-08	3.94078e-06	ENSMUSG00000021495	-0.35969	7.0197	30.0156	4.28584e-08	7.1503e-06	ENSMUSG00000022708	-0.863559	5.16015	15.0628	0.000103993	0.0165789	ENSMUSG00000055817	-0.518275	5.66418	21.4628	3.60761e-06	0.000556684	ENSMUSG00000045377	0.561741	4.64928	34.1065	5.21774e-09	7.66148e-07	ENSMUSG00000032425	0.920144	3.86108	26.6308	2.46282e-07	3.69973e-05	ENSMUSG00000014361	-0.662556	6.08092	32.0293	1.51861e-08	2.35599e-06	ENSMUSG00000022372	1.23221	1.33358	27.4191	1.63809e-07	2.56987e-05	ENSMUSG00000033904	-0.682652
ENSMUSG00000015804	-0.555489	6.07523	31.1246	2.4199e-08	3.94078e-06	ENSMUSG00000021709	0.276982	6.49293	29.8857	4.58279e-08	7.5568e-06	ENSMUSG00000032372	-2.46548	3.78643	14.9524	0.000110256	0.017373	ENSMUSG00000030306	0.592668	3.90636	21.4574	3.61775e-06	0.000556684	ENSMUSG00000067925	0.654223	4.82144	34.0377	5.40545e-09	7.84481e-07	ENSMUSG00000022587	-0.826164	6.58629	26.45	2.70447e-07	4.01551e-05	ENSMUSG00000038884	0.882896	3.48729	31.8305	1.68232e-08	2.54355e-06	ENSMUSG00000040594	1.07601	0.948858	27.342	1.70471e-07	2.64329e-05	ENSMUSG00000025981	-2.29327
ENSMUSG00000046667	-0.574148	3.31126	30.9332	2.67063e-08	4.2991e-06	ENSMUSG00000039087	-0.491089	6.39743	29.7899	4.81484e-08	7.80227e-06	ENSMUSG00000024780	-1.06955	5.85408	14.8013	0.000119452	0.0186056	ENSMUSG00000037971	-0.531859	3.89144	21.4243	3.68076e-06	0.000556684	ENSMUSG00000052316	1.47172	5.84812	33.9484	5.65945e-09	8.02856e-07	ENSMUSG00000039901	-0.437481	4.83294	26.3982	2.77804e-07	4.07733e-05	ENSMUSG00000049882	0.87214	2.7674	31.8202	1.69124e-08	2.54355e-06	ENSMUSG00000025036	-0.476781	5.92526	27.2382	1.7987e-07	2.75697e-05	ENSMUSG00000060032	0.735616
ENSMUSG00000061080	-0.232463	8.51316	30.8888	2.73239e-08	4.34853e-06	ENSMUSG00000045589	0.232577	8.55666	29.7792	4.84169e-08	7.80227e-06	ENSMUSG00000028039	1.25532	1.21434	14.7063	0.000125626	0.019345	ENSMUSG00000029836	0.633373	4.49566	21.4143	3.70011e-06	0.000556684	ENSMUSG00000027397	-0.701134	5.0019	33.9479	5.66071e-09	8.02856e-07	ENSMUSG00000006519	-0.560679	5.10542	26.3201	2.89266e-07	4.19732e-05	ENSMUSG00000060216	0.511661	3.61941	31.8118	1.69855e-08	2.54355e-06	ENSMUSG00000078495	1.52195	0.966276	26.9423	2.09623e-07	3.17651e-05	ENSMUSG00000020010	1.65361
ENSMUSG00000033306	-0.726636	3.98765	30.7918	2.87242e-08	4.52003e-06	ENSMUSG00000039763	0.477057	3.42989	29.7534	4.90646e-08	7.8178e-06	ENSMUSG00000034320	-0.904999	8.48584	14.683	0.000127186	0.0193651	ENSMUSG00000046959	-1.80085	1.19294	21.4091	3.71012e-06	0.000556684	ENSMUSG00000038900	0.705216	7.06888	33.8489	5.95613e-09	8.35264e-07	ENSMUSG00000064351	0.47982	15.7904	26.2069	3.06725e-07	4.40065e-05	ENSMUSG00000018920	0.565006	4.86391	31.7912	1.71666e-08	2.54355e-06	ENSMUSG00000092416	0.960106	3.23536	26.7603	2.30321e-07	3.45093e-05	ENSMUSG00000040127	1.07763
ENSMUSG00000037029	-0.321071	5.02863	30.5534	3.248e-08	5.05425e-06	ENSMUSG00000022323	-0.547908	5.26054	29.6678	5.12804e-08	8.08008e-06	ENSMUSG00000048087	1.28902	4.41642	14.6612	0.000128671	0.0193735	ENSMUSG00000033253	-0.457591	5.89762	21.3027	3.92181e-06	0.00058191	ENSMUSG00000079442	0.477929	4.72598	33.5549	6.92799e-09	9.60759e-07	ENSMUSG00000049858	0.574642	4.5771	26.1591	3.14405e-07	4.46071e-05	ENSMUSG00000073988	-1.23155	4.69183	31.6626	1.83422e-08	2.68755e-06	ENSMUSG00000028750	-0.888289	2.65824	26.7031	2.3724e-07	3.51511e-05	ENSMUSG00000027375	1.37416
ENSMUSG00000021076	0.273763	6.69903	30.3195	3.66418e-08	5.63921e-06	ENSMUSG00000044176	-1.51485	2.18593	29.3492	6.04421e-08	9.32875e-06	ENSMUSG00000011960	-0.516059	5.76194	14.5967	0.000133146	0.0198271	ENSMUSG00000054385	1.38203	6.76117	21.2502	4.03072e-06	0.000591497	ENSMUSG00000048087	1.02761	2.50649	33.0237	9.10437e-09	1.2487e-06	ENSMUSG00000021711	0.344841	4.76723	26.1166	3.2141e-07	4.50999e-05	ENSMUSG00000027506	0.505099	7.10417	31.3917	2.10881e-08	3.05592e-06	ENSMUSG00000024180	0.42362	8.60413	26.6666	2.41765e-07	3.54279e-05	ENSMUSG00000021619	0.87732
ENSMUSG00000024190	-0.923947	5.13835	30.283	3.73379e-08	5.68388e-06	ENSMUSG00000073755	-0.302703	6.44577	29.3467	6.05208e-08	9.32875e-06	ENSMUSG00000027082	-0.776314	4.62728	14.5416	0.000137101	0.020194	ENSMUSG00000000204	2.20386	2.6624	21.1913	4.15643e-06	0.000603315	ENSMUSG00000032340	0.36731	6.87511	32.6787	1.0872e-08	1.47493e-06	ENSMUSG00000021747	0.944374	1.63243	26.0928	3.25399e-07	4.51633e-05	ENSMUSG00000031671	-0.548306	4.72661	31.1555	2.3816e-08	3.41371e-06	ENSMUSG00000022323	0.758896	9.48752	26.54	2.58142e-07	3.74166e-05	ENSMUSG00000024131	4.2099
ENSMUSG00000027424	0.581701	2.45974	30.0962	4.11146e-08	6.1915e-06	ENSMUSG00000028927	0.334888	6.30573	29.1777	6.60356e-08	1.00694e-05	ENSMUSG00000048329	0.831306	4.08213	14.4115	0.000146901	0.021323	ENSMUSG00000044566	-1.32799	0.623328	21.0633	4.44362e-06	0.000638065	ENSMUSG00000001376	-0.452655	4.5479	32.5354	1.17043e-08	1.57076e-06	ENSMUSG00000020899	0.733201	4.4994	26.0086	3.39903e-07	4.66691e-05	ENSMUSG00000078502	-1.79893	0.401607	31.1196	2.42606e-08	3.44005e-06	ENSMUSG00000026678	0.62305	5.48065	26.4111	2.75946e-07	3.95671e-05	ENSMUSG00000050627	0.561319
ENSMUSG00000048612	0.701062	3.05443	30.0548	4.20007e-08	6.25766e-06	ENSMUSG00000062647	0.553924	7.10511	29.047	7.06434e-08	1.06574e-05	ENSMUSG00000089774	-1.2189	3.20231	14.3986	0.000147912	0.021323	ENSMUSG00000030032	-0.938529	2.41958	20.7085	5.34769e-06	0.000759713	ENSMUSG00000038384	0.464697	5.81431	32.3575	1.28259e-08	1.70298e-06	ENSMUSG00000032186	-0.913226	2.79834	25.8293	3.72989e-07	5.02103e-05	ENSMUSG00000066150	-0.413489	7.70762	30.7125	2.99234e-08	4.19787e-06	ENSMUSG00000027896	0.698404	5.85605	26.3677	2.82224e-07	4.00368e-05	ENSMUSG00000022148	1.17284
ENSMUSG00000063488	-0.62337	3.30894	30.0237	4.26798e-08	6.29191e-06	ENSMUSG00000022974	-0.397049	5.97012	28.9666	7.36369e-08	1.09921e-05	ENSMUSG00000030016	-0.501813	5.47998	14.3731	0.000149927	0.0213266	ENSMUSG00000037709	-1.72606	6.59901	20.6426	5.53503e-06	0.00077805	ENSMUSG00000024935	-1.31237	1.52098	32.1462	1.42993e-08	1.87862e-06	ENSMUSG00000019088	-0.478637	4.18985	25.8263	3.73559e-07	5.02103e-05	ENSMUSG00000009013	-0.556237	5.9524	30.3777	3.55598e-08	4.93608e-06	ENSMUSG00000041765	0.413441	5.81466	26.2373	3.01941e-07	4.2383e-05	ENSMUSG00000004952	1.22985
ENSMUSG00000063235	0.365652	4.29633	29.6931	5.06136e-08	7.38379e-06	ENSMUSG00000021311	-0.337181	4.7313	28.8499	7.82094e-08	1.1553e-05	ENSMUSG00000096255	1.95828	2.80558	14.329	0.000153479	0.0213266	ENSMUSG00000019877	0.431075	6.70667	20.4212	6.21366e-06	0.000864044	ENSMUSG00000035139	-0.520543	4.95356	32.026	1.52124e-08	1.97778e-06	ENSMUSG00000048371	-0.491873	5.81682	25.7356	3.91547e-07	5.20798e-05	ENSMUSG00000030871	-0.447469	3.98499	30.3564	3.59516e-08	4.93848e-06	ENSMUSG00000026986	-0.80954	3.49374	26.1556	3.14974e-07	4.37519e-05	ENSMUSG00000020482	-0.784206
ENSMUSG00000024383	-0.472603	5.21979	29.2414	6.38996e-08	9.22592e-06	ENSMUSG00000024743	-0.176548	8.8415	28.8181	7.95036e-08	1.15766e-05	ENSMUSG00000026773	-1.50842	5.97008	14.3227	0.000154	0.0213266	ENSMUSG00000062729	-0.638355	4.83755	20.4021	6.27619e-06	0.000864044	ENSMUSG00000027217	1.43654	4.4745	31.8971	1.62561e-08	2.09168e-06	ENSMUSG00000038005	0.726556	4.35354	25.6762	4.03777e-07	5.29958e-05	ENSMUSG00000031431	-1.52959	6.14576	30.1995	3.89806e-08	5.29935e-06	ENSMUSG00000024304	-1.433	2.25212	26.1109	3.22352e-07	4.4315e-05	ENSMUSG00000028212	-1.40171
ENSMUSG00000090129	-1.30393	0.866474	29.2205	6.45922e-08	9.23076e-06	ENSMUSG00000037999	0.276727	6.46033	28.8039	8.00903e-08	1.15766e-05	ENSMUSG00000037190	0.71576	3.28366	14.3198	0.000154232	0.0213266	ENSMUSG00000054545	-1.29052	3.55646	20.3705	6.38056e-06	0.000869448	ENSMUSG00000042359	-0.763419	5.51163	31.7024	1.79696e-08	2.28856e-06	ENSMUSG00000038302	0.541602	5.45521	25.6621	4.06734e-07	5.29958e-05	ENSMUSG00000052794	0.780155	2.75277	30.1345	4.03101e-08	5.42418e-06	ENSMUSG00000037938	0.451817	3.45097	25.8826	3.6283e-07	4.93707e-05	ENSMUSG00000050069	-1.2941
ENSMUSG00000060586	1.2794	0.907771	29.0889	6.91325e-08	9.77981e-06	ENSMUSG00000025735	-0.727829	2.85872	28.7684	8.15725e-08	1.15766e-05	ENSMUSG00000040170	-1.1233	4.4886	14.2485	0.00016019	0.0217239	ENSMUSG00000027132	0.650433	3.30354	20.3239	6.53775e-06	0.00088187	ENSMUSG00000019797	-0.375085	5.7384	31.5751	1.91879e-08	2.41903e-06	ENSMUSG00000020331	1.70229	5.1923	25.6269	4.14221e-07	5.31515e-05	ENSMUSG00000040543	0.749828	3.22737	29.9024	4.54339e-08	6.05189e-06	ENSMUSG00000042647	0.936479	5.39465	25.855	3.68053e-07	4.95757e-05	ENSMUSG00000028339	1.33228
ENSMUSG00000076431	0.485973	5.27855	28.935	7.48473e-08	1.04824e-05	ENSMUSG00000037071	0.39978	7.93884	28.7669	8.16345e-08	1.15766e-05	ENSMUSG00000056116	-1.5752	4.6205	14.2471	0.000160312	0.0217239	ENSMUSG00000014956	0.52512	7.80014	20.2765	6.70197e-06	0.000892544	ENSMUSG00000031939	-0.64888	3.84409	31.2193	2.30468e-08	2.87647e-06	ENSMUSG00000020902	0.81235	7.9246	25.6175	4.16254e-07	5.31515e-05	ENSMUSG00000039768	-0.35587	6.61836	29.7169	4.99976e-08	6.59318e-06	ENSMUSG00000029998	0.326777	7.06636	25.6904	4.00823e-07	5.34498e-05	ENSMUSG00000051506	1.10884
ENSMUSG00000040537	-0.333105	8.36231	28.8613	7.77497e-08	1.07441e-05	ENSMUSG00000024614	0.352044	6.15964	28.5877	8.95505e-08	1.25734e-05	ENSMUSG00000038451	0.687584	4.21463	14.2283	0.000161919	0.0217244	ENSMUSG00000022194	-0.511427	5.6507	20.2627	6.75056e-06	0.000892544	ENSMUSG00000001627	-0.707468	5.18359	31.1287	2.41474e-08	2.97423e-06	ENSMUSG00000031805	-0.424264	5.81545	25.2719	4.97922e-07	6.29502e-05	ENSMUSG00000020287	0.558071	3.57732	29.3669	5.98931e-08	7.8199e-06	ENSMUSG00000056671	1.15179	0.763866	25.565	4.27727e-07	5.64727e-05	ENSMUSG00000063047	-0.757742
ENSMUSG00000054280	-0.32198	6.08401	28.8489	7.82508e-08	1.07441e-05	ENSMUSG00000022983	-0.224695	5.85665	28.5348	9.20293e-08	1.27948e-05	ENSMUSG00000020806	0.510736	4.98701	14.1471	0.000169056	0.0224596	ENSMUSG00000022231	0.779908	5.81456	20.1018	7.34282e-06	0.000961334	ENSMUSG00000001542	-0.85389	4.26519	31.1159	2.43067e-08	2.97423e-06	ENSMUSG00000021996	0.32593	6.18356	25.2483	5.04029e-07	6.30975e-05	ENSMUSG00000034522	0.608959	4.6411	29.31	6.16771e-08	7.97388e-06	ENSMUSG00000054545	-1.03513	1.8334	25.3017	4.90285e-07	6.40976e-05	ENSMUSG00000047230	0.881441
ENSMUSG00000024357	0.512187	4.26733	28.785	8.08768e-08	1.09969e-05	ENSMUSG00000019432	-0.20029	7.66737	28.4336	9.69689e-08	1.33506e-05	ENSMUSG00000030157	-0.839615	5.84184	14.1174	0.000171745	0.0225952	ENSMUSG00000026358	1.16042	2.77647	20.0579	7.51337e-06	0.000968837	ENSMUSG00000015656	-0.617876	9.29279	30.8559	2.77921e-08	3.3677e-06	ENSMUSG00000039518	-1.59446	0.635572	25.1977	5.17445e-07	6.41482e-05	ENSMUSG00000026819	-1.52416	6.72407	29.2457	6.37571e-08	8.16276e-06	ENSMUSG00000038623	-0.781549	2.27081	25.2741	4.97343e-07	6.4389e-05	ENSMUSG00000069208	-1.35189
ENSMUSG00000024091	0.262737	6.97424	28.7367	8.29168e-08	1.11659e-05	ENSMUSG00000037813	0.648928	2.87358	28.3447	1.01525e-07	1.38436e-05	ENSMUSG00000020893	-1.46475	5.877	14.0462	0.000178372	0.0232415	ENSMUSG00000042498	1.17093	0.599006	20.0498	7.54524e-06	0.000968837	ENSMUSG00000058756	0.499811	6.90159	30.7179	2.98397e-08	3.54622e-06	ENSMUSG00000032925	-0.600405	3.34755	25.0651	5.54267e-07	6.80522e-05	ENSMUSG00000095567	-0.448165	5.93026	28.8186	7.94833e-08	1.00783e-05	ENSMUSG00000031521	-0.575202	4.67897	25.0094	5.70511e-07	7.31516e-05	ENSMUSG00000030474	1.54325
ENSMUSG00000036160	-0.343869	4.59874	28.5508	9.12708e-08	1.21738e-05	ENSMUSG00000027881	-0.435543	6.34675	28.3122	1.03241e-07	1.39434e-05	ENSMUSG00000020482	-0.581544	4.87171	13.9355	0.000189187	0.024416	ENSMUSG00000025094	0.950859	2.0285	19.9504	7.94757e-06	0.00101078	ENSMUSG00000032041	1.04157	3.78029	30.7008	3.01044e-08	3.54622e-06	ENSMUSG00000096687	0.63208	3.27001	25.0002	5.73257e-07	6.97135e-05	ENSMUSG00000059772	0.639384	3.09708	28.711	8.40258e-08	1.05528e-05	ENSMUSG00000068762	-1.59174	0.462454	24.9016	6.03337e-07	7.66238e-05	ENSMUSG00000090264	-2.18947
ENSMUSG00000078570	0.44	4.30244	28.4101	9.81509e-08	1.2968e-05	ENSMUSG00000071281	0.435805	3.47855	28.2064	1.09044e-07	1.45882e-05	ENSMUSG00000111375	0.887093	2.14024	13.8692	0.000195982	0.0249945	ENSMUSG00000015488	-0.461141	5.79728	19.9068	8.13095e-06	0.0010198	ENSMUSG00000000948	-1.32231	2.50356	30.6999	3.01177e-08	3.54622e-06	ENSMUSG00000028420	0.628791	5.1813	24.9139	5.99498e-07	7.22169e-05	ENSMUSG00000040383	-0.470826	5.13118	28.6644	8.60713e-08	1.07078e-05	ENSMUSG00000020899	0.761627	5.27822	24.7809	6.42319e-07	8.08049e-05	ENSMUSG00000040264	1.81776
ENSMUSG00000024026	0.750768	6.77564	28.3729	1.00055e-07	1.29923e-05	ENSMUSG00000029836	0.377543	5.30627	28.1781	1.1065e-07	1.46648e-05	ENSMUSG00000063362	-0.707615	5.15656	13.8561	0.000197359	0.0249945	ENSMUSG00000041354	-0.576197	5.37465	19.8974	8.17125e-06	0.0010198	ENSMUSG00000020072	-1.47482	1.29773	30.6164	3.14429e-08	3.66765e-06	ENSMUSG00000042797	1.10286	0.934332	24.7195	6.63105e-07	7.91326e-05	ENSMUSG00000037747	-0.512743	5.91371	28.6445	8.69612e-08	1.07174e-05	ENSMUSG00000042116	1.05396	5.71479	24.7389	6.56449e-07	8.18108e-05	ENSMUSG00000061759	-0.605308
ENSMUSG00000027523	0.173915	10.5775	28.3703	1.0019e-07	1.29923e-05	ENSMUSG00000040940	-0.405778	6.46555	28.0564	1.17829e-07	1.54716e-05	ENSMUSG00000102802	-0.577193	6.22964	13.7713	0.000206471	0.0259063	ENSMUSG00000074194	1.47173	3.02137	19.8131	8.53965e-06	0.00105591	ENSMUSG00000029447	-0.408201	6.74424	30.4801	3.37311e-08	3.89813e-06	ENSMUSG00000053702	0.424242	8.45091	24.5797	7.12977e-07	8.38778e-05	ENSMUSG00000000093	0.377754	6.63424	28.5362	9.1965e-08	1.12291e-05	ENSMUSG00000020151	2.64023	3.378	24.5505	7.23871e-07	8.9378e-05	ENSMUSG00000011263	0.603315
ENSMUSG00000028845	1.12725	0.795077	28.2625	1.05926e-07	1.36101e-05	ENSMUSG00000045180	0.276313	6.50092	28.0202	1.20057e-07	1.56195e-05	ENSMUSG00000025188	0.587018	4.86453	13.6923	0.000215339	0.0267712	ENSMUSG00000057969	-0.487752	6.19667	19.6414	9.34235e-06	0.00114457	ENSMUSG00000041734	0.475544	4.16925	30.3347	3.63558e-08	4.1629e-06	ENSMUSG00000030917	0.693665	4.54333	24.5716	7.16006e-07	8.38778e-05	ENSMUSG00000041477	0.537789	3.58679	28.4874	9.43083e-08	1.12727e-05	ENSMUSG00000021376	-0.494836	6.85649	24.4897	7.47077e-07	9.1397e-05	ENSMUSG00000041378	0.765175
ENSMUSG00000006315	0.246589	5.36603	28.0443	1.18567e-07	1.50957e-05	ENSMUSG00000022885	0.396195	4.30783	27.892	1.28282e-07	1.65379e-05	ENSMUSG00000001751	0.740906	4.77428	13.429	0.000247765	0.0305224	ENSMUSG00000052423	-0.449377	5.24012	19.5887	9.60331e-06	0.00115937	ENSMUSG00000045092	-0.623373	6.18114	30.1662	3.96557e-08	4.49948e-06	ENSMUSG00000025757	0.561432	6.15617	24.4941	7.45364e-07	8.65232e-05	ENSMUSG00000070780	-0.449215	8.43113	28.469	9.52096e-08	1.12727e-05	ENSMUSG00000078502	2.94376	0.0840804	24.4609	7.58326e-07	9.19298e-05	ENSMUSG00000059555	0.993643
ENSMUSG00000043445	0.238114	6.73023	27.9092	1.27147e-07	1.59452e-05	ENSMUSG00000052752	-0.301789	5.86909	27.6983	1.41785e-07	1.8114e-05	ENSMUSG00000036902	-1.15581	2.38149	13.366	0.000256223	0.03128	ENSMUSG00000054604	0.390641	6.61171	19.5821	9.63683e-06	0.00115937	ENSMUSG00000036206	-0.484712	4.6907	30.019	4.27842e-08	4.81072e-06	ENSMUSG00000003849	-0.553999	5.49314	24.4647	7.56819e-07	8.70615e-05	ENSMUSG00000022707	-0.360505	5.65157	28.4676	9.5281e-08	1.12727e-05	ENSMUSG00000024131	-0.429184	9.12855	24.2714	8.36701e-07	9.9745e-05	ENSMUSG00000039220	-1.10164
ENSMUSG00000074925	-0.520082	5.92458	27.8999	1.27755e-07	1.59452e-05	ENSMUSG00000009207	0.34023	5.51023	27.6564	1.4489e-07	1.82417e-05	ENSMUSG00000052369	0.782644	3.41388	13.2937	0.0002663	0.0321785	ENSMUSG00000020740	-0.704916	5.59933	19.4918	1.01032e-05	0.00120463	ENSMUSG00000015749	-0.444351	6.9183	29.9395	4.45743e-08	4.96725e-06	ENSMUSG00000042208	0.569647	3.67445	24.4391	7.66977e-07	8.74422e-05	ENSMUSG00000021928	0.647401	3.41098	28.4582	9.57417e-08	1.12727e-05	ENSMUSG00000010358	0.749703	3.15175	24.269	8.37753e-07	9.9745e-05	ENSMUSG00000032392	-0.479653
ENSMUSG00000059361	0.309132	6.58855	27.8863	1.28654e-07	1.59452e-05	ENSMUSG00000030534	-0.365942	4.67153	27.6377	1.46303e-07	1.82417e-05	ENSMUSG00000028443	0.80006	3.40383	13.2794	0.000268332	0.0321785	ENSMUSG00000017868	-0.780282	4.43509	19.4363	1.04012e-05	0.00122919	ENSMUSG00000029422	-0.378457	5.88859	29.8484	4.67181e-08	5.16008e-06	ENSMUSG00000071708	0.569783	6.31585	24.3358	8.0919e-07	9.14384e-05	ENSMUSG00000004098	1.91853	2.92791	28.3993	9.87022e-08	1.15185e-05	ENSMUSG00000039395	-1.62358	3.02472	24.1811	8.76878e-07	0.000103479	ENSMUSG00000034902	0.466712
ENSMUSG00000103088	0.689611	3.69769	27.8416	1.31662e-07	1.61455e-05	ENSMUSG00000035278	-0.303014	5.15636	27.6332	1.46644e-07	1.82417e-05	ENSMUSG00000036639	0.851845	3.67242	13.2144	0.000277801	0.0330218	ENSMUSG00000041075	-0.506023	4.79577	19.3526	1.08669e-05	0.00127295	ENSMUSG00000034723	-0.560597	6.98251	29.7341	4.95542e-08	5.42532e-06	ENSMUSG00000046245	-1.38904	0.998305	24.2284	8.55595e-07	9.58342e-05	ENSMUSG00000001467	-0.747927	9.22908	28.3431	1.01609e-07	1.17537e-05	ENSMUSG00000071711	0.386278	6.59136	24.0153	9.55747e-07	0.000111103	ENSMUSG00000033826	1.75966
ENSMUSG00000003380	0.260985	7.1612	27.8282	1.32576e-07	1.61455e-05	ENSMUSG00000034997	0.470458	4.6819	27.4777	1.58917e-07	1.95966e-05	ENSMUSG00000058921	-0.770237	5.44514	13.1513	0.000287327	0.0338571	ENSMUSG00000078193	1.1325	0.626714	19.325	1.10252e-05	0.00128026	ENSMUSG00000028763	0.404124	9.77186	29.7086	5.02116e-08	5.44949e-06	ENSMUSG00000007950	0.324837	5.54761	24.1993	8.68617e-07	9.64467e-05	ENSMUSG00000028410	-0.780637	8.03942	28.0369	1.19022e-07	1.36482e-05	ENSMUSG00000063590	-1.12708	6.47835	24.0105	9.58142e-07	0.000111103	ENSMUSG00000048368	-1.95211
ENSMUSG00000005575	0.226865	7.30817	27.7321	1.3933e-07	1.68216e-05	ENSMUSG00000014195	-0.166116	7.21914	27.3148	1.72887e-07	2.11355e-05	ENSMUSG00000015943	0.679784	3.05837	13.1195	0.000292236	0.0341387	ENSMUSG00000024070	0.427847	4.43382	19.3037	1.11492e-05	0.0012835	ENSMUSG00000039221	-0.600428	4.89591	29.6611	5.1456e-08	5.52103e-06	ENSMUSG00000018659	-0.542343	4.3041	24.0234	9.51726e-07	0.000104764	ENSMUSG00000074063	-1.21547	5.86961	27.9137	1.26846e-07	1.43104e-05	ENSMUSG00000025197	2.36047	3.352	23.9743	9.76311e-07	0.000112234	ENSMUSG00000028599	-1.44276
ENSMUSG00000034640	-0.718345	4.02926	27.6541	1.45061e-07	1.7364e-05	ENSMUSG00000028248	-0.307593	7.87929	27.234	1.80264e-07	2.18489e-05	ENSMUSG00000028059	0.533623	6.55893	13.0829	0.00029801	0.0345157	ENSMUSG00000026621	-2.66806	2.71015	19.2678	1.13607e-05	0.00129668	ENSMUSG00000038545	0.419012	5.21604	29.6499	5.17555e-08	5.52103e-06	ENSMUSG00000034786	-0.731722	2.28996	23.9395	9.94093e-07	0.000108092	ENSMUSG00000117621	-1.67539	2.61734	27.9107	1.27043e-07	1.43104e-05	ENSMUSG00000032425	1.06966	4.48108	23.8593	1.03639e-06	0.000118122	ENSMUSG00000025920	0.624349
ENSMUSG00000117286	-0.37028	4.96719	27.5936	1.49674e-07	1.77643e-05	ENSMUSG00000043162	0.764244	4.02226	27.186	1.84792e-07	2.21524e-05	ENSMUSG00000075296	-1.51904	0.514206	13.0397	0.000304951	0.0350203	ENSMUSG00000069495	0.523974	5.04359	19.2335	1.15663e-05	0.00130896	ENSMUSG00000024778	-1.13501	3.5261	29.5674	5.40066e-08	5.71234e-06	ENSMUSG00000078867	-1.92341	0.224691	23.9303	9.98893e-07	0.000108092	ENSMUSG00000063694	-0.376741	7.99847	27.8954	1.28053e-07	1.43104e-05	ENSMUSG00000024588	0.392792	7.2657	23.6774	1.13913e-06	0.000128732	ENSMUSG00000038608	0.901036
ENSMUSG00000043903	-0.571633	2.65724	27.4814	1.58611e-07	1.86668e-05	ENSMUSG00000037833	-1.10391	0.500493	27.1745	1.85892e-07	2.21524e-05	ENSMUSG00000026941	-0.902941	2.46649	13.0041	0.000310803	0.0353923	ENSMUSG00000032637	-0.443592	7.54075	19.2043	1.17449e-05	0.00131799	ENSMUSG00000016319	-0.405352	8.24859	29.538	5.4831e-08	5.75081e-06	ENSMUSG00000024413	0.867442	6.39818	23.8581	1.03703e-06	0.000110687	ENSMUSG00000031517	-0.765212	6.9252	27.6096	1.48437e-07	1.64491e-05	ENSMUSG00000074170	0.638215	4.79067	23.4478	1.28351e-06	0.000142911	ENSMUSG00000024026	0.949718
ENSMUSG00000002265	-0.277016	9.43134	27.4106	1.64529e-07	1.92019e-05	ENSMUSG00000031808	-0.272612	7.32446	27.1503	1.88231e-07	2.22442e-05	ENSMUSG00000022235	1.03361	6.52051	12.8783	0.000332423	0.0375311	ENSMUSG00000074577	-0.845	2.12579	19.1774	1.19115e-05	0.00132555	ENSMUSG00000005442	0.400533	6.57615	29.5059	5.57461e-08	5.79806e-06	ENSMUSG00000035545	-0.30588	7.61153	23.8522	1.04021e-06	0.000110687	ENSMUSG00000042015	0.523084	4.55853	27.5238	1.55175e-07	1.69279e-05	ENSMUSG00000071657	0.357099	5.8296	23.444	1.28603e-06	0.000142911	ENSMUSG00000090877	-2.27197
ENSMUSG00000028341	-0.955677	5.16406	27.3658	1.68381e-07	1.9489e-05	ENSMUSG00000046330	0.442121	6.35545	27.1283	1.9039e-07	2.23134e-05	ENSMUSG00000033909	-0.515893	5.56263	12.8587	0.000335905	0.0375311	ENSMUSG00000113450	1.20417	0.822659	19.1224	1.22596e-05	0.00134989	ENSMUSG00000056091	-0.442401	6.00379	29.4227	5.81912e-08	6.00235e-06	ENSMUSG00000079487	-0.292747	5.85053	23.7068	1.12185e-06	0.000118387	ENSMUSG00000030917	0.54974	4.34371	27.518	1.55638e-07	1.69279e-05	ENSMUSG00000070645	1.07017	7.55134	23.3892	1.32318e-06	0.00014512	ENSMUSG00000003283	1.36901
ENSMUSG00000086158	1.00531	1.75084	27.3449	1.70214e-07	1.95397e-05	ENSMUSG00000021606	-0.324192	5.48119	27.0656	1.96669e-07	2.28604e-05	ENSMUSG00000030814	0.745265	3.8934	12.8477	0.000337893	0.0375311	ENSMUSG00000046330	0.549558	7.37798	19.1111	1.23323e-05	0.00134989	ENSMUSG00000052336	2.03103	3.0504	29.3882	5.92374e-08	6.06018e-06	ENSMUSG00000075327	-0.431977	3.37278	23.5266	1.23197e-06	0.000127789	ENSMUSG00000068240	1.05638	1.03942	27.506	1.56609e-07	1.69279e-05	ENSMUSG00000052085	-0.41345	6.8475	23.3827	1.32768e-06	0.00014512	ENSMUSG00000057074	2.10498
ENSMUSG00000047466	-0.280727	5.67474	27.0428	1.99005e-07	2.26591e-05	ENSMUSG00000109179	-0.62384	3.11882	26.9497	2.08824e-07	2.38669e-05	ENSMUSG00000022111	0.556342	4.25828	12.8172	0.000343441	0.0378372	ENSMUSG00000014786	-0.702906	2.54414	19.0344	1.28385e-05	0.00139386	ENSMUSG00000048920	0.339149	5.99572	29.3546	6.02739e-08	6.11608e-06	ENSMUSG00000067786	-1.16131	2.31259	23.514	1.2401e-06	0.000127789	ENSMUSG00000091971	-2.40641	3.82498	27.4397	1.62072e-07	1.73759e-05	ENSMUSG00000027371	0.514126	5.56	23.2634	1.41263e-06	0.00015315	ENSMUSG00000063704	2.22387
ENSMUSG00000022674	0.378887	4.8146	26.9623	2.07466e-07	2.34319e-05	ENSMUSG00000041130	-0.367365	6.31485	26.9358	2.10324e-07	2.38669e-05	ENSMUSG00000052137	-0.815266	2.92169	12.8014	0.000346358	0.0378508	ENSMUSG00000023031	-3.82504	5.2987	18.9081	1.37171e-05	0.00147725	ENSMUSG00000069763	-1.07287	3.16906	29.3207	6.13385e-08	6.17392e-06	ENSMUSG00000075054	0.762776	5.24101	23.5126	1.24096e-06	0.000127789	ENSMUSG00000024251	-0.4982	4.40574	27.4213	1.63615e-07	1.73999e-05	ENSMUSG00000075284	-0.411288	4.1382	23.1481	1.49989e-06	0.000161299	ENSMUSG00000037029	-0.453426
ENSMUSG00000045991	-0.664675	3.18663	26.8666	2.17993e-07	2.44239e-05	ENSMUSG00000020092	-0.419354	3.90546	26.9353	2.10377e-07	2.38669e-05	ENSMUSG00000026956	0.993221	5.11511	12.7602	0.000354081	0.0383852	ENSMUSG00000026939	-0.572302	2.88531	18.8853	1.38816e-05	0.00148299	ENSMUSG00000025127	-1.57225	1.01642	29.0956	6.88941e-08	6.87894e-06	ENSMUSG00000042453	-1.09448	2.52333	23.4785	1.26317e-06	0.000129036	ENSMUSG00000036905	0.880524	2.97829	27.2603	1.77825e-07	1.87598e-05	ENSMUSG00000050708	0.498273	9.71365	22.998	1.62171e-06	0.000173004	ENSMUSG00000022601	-0.506241
ENSMUSG00000023845	-0.435625	7.24491	26.7733	2.28775e-07	2.54286e-05	ENSMUSG00000071708	0.188401	6.60498	26.8122	2.24215e-07	2.52348e-05	ENSMUSG00000020792	0.576165	5.68995	12.7403	0.000357858	0.0384868	ENSMUSG00000002881	0.531369	5.3488	18.8104	1.44377e-05	0.00153017	ENSMUSG00000032946	-0.573893	5.40245	29.0137	7.18688e-08	7.119e-06	ENSMUSG00000026078	0.399302	5.49114	23.2962	1.38876e-06	0.000140739	ENSMUSG00000078771	1.28096	0.359697	27.1938	1.84048e-07	1.92622e-05	ENSMUSG00000015476	-0.862618	1.72343	22.9687	1.64664e-06	0.000173254	ENSMUSG00000117679	-0.855238
ENSMUSG00000026078	-0.466503	4.66095	26.7573	2.30675e-07	2.54378e-05	ENSMUSG00000028773	0.32543	5.19712	26.6981	2.37854e-07	2.65591e-05	ENSMUSG00000056025	-1.31926	3.98787	12.6329	0.000379012	0.0401656	ENSMUSG00000015095	-0.41656	5.56664	18.5921	1.61893e-05	0.0017023	ENSMUSG00000031700	-0.615612	5.35236	28.9628	7.37833e-08	7.2511e-06	ENSMUSG00000040843	0.331667	5.11976	23.268	1.40924e-06	0.000141689	ENSMUSG00000027293	0.354208	5.73225	26.9716	2.06469e-07	2.14387e-05	ENSMUSG00000053119	0.222732	6.57882	22.9647	1.65004e-06	0.000173254	ENSMUSG00000017747	0.557273
ENSMUSG00000069662	0.331607	7.82357	26.7157	2.35699e-07	2.57888e-05	ENSMUSG00000053929	-0.321624	5.60596	26.6543	2.43314e-07	2.69566e-05	ENSMUSG00000029446	-0.7639	3.21393	12.631	0.000379397	0.0401656	ENSMUSG00000063406	0.710326	4.26623	18.5146	1.68608e-05	0.00175906	ENSMUSG00000035011	0.403139	6.23258	28.8271	7.91355e-08	7.71633e-06	ENSMUSG00000069515	-2.24239	4.11403	23.082	1.55233e-06	0.000154858	ENSMUSG00000030790	-0.839743	3.39765	26.9424	2.09612e-07	2.1595e-05	ENSMUSG00000046688	1.49198	2.83756	22.9037	1.70323e-06	0.00017711	ENSMUSG00000071637	-1.06871
ENSMUSG00000056666	-0.77325	3.82509	26.6058	2.49488e-07	2.70858e-05	ENSMUSG00000042644	-0.687052	3.91047	26.6244	2.47099e-07	2.71636e-05	ENSMUSG00000060032	0.468229	6.06476	12.5753	0.000390886	0.0407766	ENSMUSG00000033987	-0.94459	2.31397	18.4899	1.70809e-05	0.00176224	ENSMUSG00000024968	0.75359	4.49117	28.7356	8.29654e-08	7.98886e-06	ENSMUSG00000048126	-0.685339	5.70643	23.0147	1.60769e-06	0.000158267	ENSMUSG00000040339	1.322	4.97707	26.843	2.20673e-07	2.25583e-05	ENSMUSG00000020453	-0.285286	5.21581	22.8924	1.71332e-06	0.00017711	ENSMUSG00000021701	0.968826
ENSMUSG00000039278	0.251789	9.57717	26.5287	2.5965e-07	2.7947e-05	ENSMUSG00000024830	-0.472438	5.10971	26.5318	2.59242e-07	2.82793e-05	ENSMUSG00000032350	-0.621131	7.38351	12.5738	0.000391186	0.0407766	ENSMUSG00000040195	0.549821	4.1226	18.4757	1.72088e-05	0.00176224	ENSMUSG00000079484	-1.26587	2.42802	28.7299	8.32107e-08	7.98886e-06	ENSMUSG00000021948	-0.626589	4.6551	23.0104	1.6113e-06	0.000158267	ENSMUSG00000040234	-0.61171	7.12043	26.7694	2.29233e-07	2.32531e-05	ENSMUSG00000024537	0.441641	4.19794	22.8678	1.7353e-06	0.000177775	ENSMUSG00000026360	1.06272
ENSMUSG00000038370	0.352248	7.10732	26.5034	2.63069e-07	2.7947e-05	ENSMUSG00000024811	0.213455	7.23505	26.4652	2.68327e-07	2.90469e-05	ENSMUSG00000030954	1.10428	2.09453	12.5117	0.000404414	0.041627	ENSMUSG00000090223	1.22702	1.42193	18.467	1.72873e-05	0.00176224	ENSMUSG00000029096	0.465088	7.06969	28.6773	8.54981e-08	8.14581e-06	ENSMUSG00000036073	0.525894	4.84607	22.9822	1.63509e-06	0.000158624	ENSMUSG00000022583	-2.8382	1.08306	26.7146	2.35835e-07	2.37401e-05	ENSMUSG00000020326	0.503779	7.41307	22.8427	1.75813e-06	0.000177775	ENSMUSG00000029622	0.603021
ENSMUSG00000049791	-0.510055	4.19242	26.501	2.63406e-07	2.7947e-05	ENSMUSG00000056004	0.247977	5.93588	26.4222	2.74368e-07	2.94759e-05	ENSMUSG00000035778	3.62803	6.37737	12.5067	0.000405488	0.041627	ENSMUSG00000034401	0.679237	1.79251	18.3515	1.83671e-05	0.00185814	ENSMUSG00000026034	-0.686063	6.52576	28.6267	8.77649e-08	8.29844e-06	ENSMUSG00000063334	0.340298	4.5996	22.9767	1.63978e-06	0.000158624	ENSMUSG00000027679	-0.409679	6.28206	26.6768	2.40489e-07	2.38932e-05	ENSMUSG00000032064	-0.551403	4.23957	22.841	1.75975e-06	0.000177775	ENSMUSG00000021149	-0.528119
ENSMUSG00000023034	-1.31948	6.27771	26.4716	2.67448e-07	2.81625e-05	ENSMUSG00000051557	-0.489835	4.36268	26.3052	2.91496e-07	3.10805e-05	ENSMUSG00000033863	-0.651239	5.94823	12.4822	0.000410857	0.0418089	ENSMUSG00000047368	0.348613	5.26128	18.3273	1.86025e-05	0.0018678	ENSMUSG00000059555	0.925222	3.13388	28.5533	9.11566e-08	8.55433e-06	ENSMUSG00000020740	-0.510976	5.05698	22.8566	1.74553e-06	0.000167584	ENSMUSG00000059714	0.342516	5.33918	26.6729	2.40979e-07	2.38932e-05	ENSMUSG00000029804	0.829971	6.21715	22.7751	1.82107e-06	0.000182586	ENSMUSG00000039156	-0.977185
ENSMUSG00000045817	0.44489	4.90675	26.3863	2.79519e-07	2.92139e-05	ENSMUSG00000035545	-0.503783	8.62588	26.2684	2.97116e-07	3.14433e-05	ENSMUSG00000036027	1.71041	3.51805	12.4666	0.000414289	0.0418089	ENSMUSG00000018752	-1.23784	1.12647	18.1867	2.00275e-05	0.00199588	ENSMUSG00000095041	-0.919832	4.90527	28.5019	9.36064e-08	8.71867e-06	ENSMUSG00000042213	0.8087	2.76995	22.8164	1.78241e-06	0.000169848	ENSMUSG00000028743	-0.659355	8.60631	26.5946	2.50946e-07	2.45893e-05	ENSMUSG00000028580	-0.294755	6.55205	22.6827	1.91078e-06	0.000190151	ENSMUSG00000028145	-0.896855
ENSMUSG00000025993	0.543491	3.45529	26.3109	2.90648e-07	3.01521e-05	ENSMUSG00000002147	-0.395573	3.96373	26.2523	2.99591e-07	3.14703e-05	ENSMUSG00000027177	-0.513812	6.35176	12.4566	0.000416515	0.0418089	ENSMUSG00000029454	-0.664597	2.95671	18.1268	2.06675e-05	0.00204341	ENSMUSG00000020288	-0.766612	4.69296	28.4657	9.53747e-08	8.81756e-06	ENSMUSG00000063320	0.568191	3.99858	22.7998	1.79782e-06	0.000170047	ENSMUSG00000020803	-0.474395	6.75851	26.5871	2.51918e-07	2.45893e-05	ENSMUSG00000043673	-0.813426	1.58545	22.6434	1.95032e-06	0.000192649	ENSMUSG00000038387	0.510532
ENSMUSG00000061111	0.251961	5.8455	26.2799	2.95349e-07	3.04145e-05	ENSMUSG00000035673	-0.370825	5.01741	26.2121	3.05894e-07	3.18962e-05	ENSMUSG00000038056	-0.606751	6.69718	12.4303	0.00042242	0.0420898	ENSMUSG00000035133	0.615779	6.83835	18.1136	2.08105e-05	0.00204341	ENSMUSG00000064360	-2.96279	3.0686	28.4042	9.84512e-08	9.03507e-06	ENSMUSG00000052921	-0.26601	6.42067	22.6846	1.90893e-06	0.000177322	ENSMUSG00000050856	-0.559492	6.96474	26.5622	2.55182e-07	2.45893e-05	ENSMUSG00000031565	-0.307621	6.34646	22.5589	2.03799e-06	0.000199828	ENSMUSG00000022219	0.362251
ENSMUSG00000040345	1.20014	0.322306	26.242	3.01196e-07	3.07902e-05	ENSMUSG00000037326	-0.36751	6.08322	26.1864	3.09996e-07	3.20767e-05	ENSMUSG00000005575	0.500681	6.88998	12.3808	0.000433774	0.0425499	ENSMUSG00000075232	0.647298	4.428	18.0619	2.13836e-05	0.00208435	ENSMUSG00000055172	0.696044	3.99759	28.2855	1.04675e-07	9.53611e-06	ENSMUSG00000094686	-0.965237	3.72631	22.6736	1.91986e-06	0.000177322	ENSMUSG00000019158	0.47193	4.47002	26.5601	2.55459e-07	2.45893e-05	ENSMUSG00000041954	-0.977178	1.26702	22.5186	2.0812e-06	0.000202576	ENSMUSG00000014542	0.719319
ENSMUSG00000020255	-0.34959	5.47928	26.2106	3.06135e-07	3.10683e-05	ENSMUSG00000013662	0.185834	6.65648	26.1731	3.12149e-07	3.20767e-05	ENSMUSG00000038393	-0.670641	8.15487	12.3808	0.000433778	0.0425499	ENSMUSG00000026004	0.63623	3.07976	18.0351	2.16875e-05	0.00209866	ENSMUSG00000003934	0.724287	7.51561	28.1446	1.12582e-07	1.01821e-05	ENSMUSG00000021646	-0.380447	6.31265	22.6733	1.92015e-06	0.000177322	ENSMUSG00000029811	1.47076	2.52261	26.4386	2.72055e-07	2.5997e-05	ENSMUSG00000023572	0.293348	5.71896	22.4365	2.17212e-06	0.000209893	ENSMUSG00000039936	1.16063
ENSMUSG00000017418	-0.450956	4.72192	26.1437	3.16922e-07	3.19316e-05	ENSMUSG00000037243	-0.540905	5.36909	26.1468	3.1642e-07	3.21092e-05	ENSMUSG00000031604	-0.829751	6.83639	12.3693	0.000436457	0.0425499	ENSMUSG00000059326	-0.69934	4.4664	17.9553	2.26149e-05	0.00215752	ENSMUSG00000020386	-0.323656	6.70266	28.1299	1.13439e-07	1.01858e-05	ENSMUSG00000019804	0.244812	6.89917	22.6506	1.94296e-06	0.000177322	ENSMUSG00000041594	-0.452728	4.924	26.3699	2.81898e-07	2.67438e-05	ENSMUSG00000028447	0.274739	5.51858	22.3011	2.33079e-06	0.000223605	ENSMUSG00000070709	0.897893
ENSMUSG00000055296	-0.442205	6.52742	26.1094	3.22607e-07	3.22722e-05	ENSMUSG00000016356	-0.907596	2.46541	26.1433	3.16993e-07	3.21092e-05	ENSMUSG00000026489	0.811194	4.70429	12.3494	0.000441137	0.0426989	ENSMUSG00000055926	-0.969693	1.06691	17.955	2.26189e-05	0.00215752	ENSMUSG00000031974	-0.381781	6.24438	28.0045	1.21035e-07	1.07902e-05	ENSMUSG00000061723	-2.66097	2.05278	22.6494	1.94417e-06	0.000177322	ENSMUSG00000025017	1.09679	1.49453	26.3083	2.91038e-07	2.74137e-05	ENSMUSG00000041536	-1.86868	0.425134	22.2612	2.3797e-06	0.000226666	ENSMUSG00000003316	0.404037
ENSMUSG00000038056	-0.477341	6.94852	26.0215	3.37638e-07	3.35363e-05	ENSMUSG00000027206	0.221764	6.28009	26.0792	3.2769e-07	3.29572e-05	ENSMUSG00000047423	0.550453	4.70948	12.2592	0.000462962	0.0444936	ENSMUSG00000020576	-0.548841	5.48792	17.9115	2.31423e-05	0.00217481	ENSMUSG00000038412	-0.449404	6.67506	27.8643	1.30127e-07	1.15185e-05	ENSMUSG00000030095	-0.356665	5.12268	22.6352	1.95859e-06	0.00017737	ENSMUSG00000017390	-0.790941	4.22968	26.2878	2.94148e-07	2.75102e-05	ENSMUSG00000015804	0.39532	6.64632	22.2459	2.39864e-06	0.00022685	ENSMUSG00000041483	-0.826528
ENSMUSG00000034460	-1.00804	1.42594	25.9807	3.4485e-07	3.40114e-05	ENSMUSG00000041797	0.52865	3.44187	26.0312	3.35947e-07	3.33372e-05	ENSMUSG00000029452	-1.83089	2.01509	12.2208	0.000472584	0.0448734	ENSMUSG00000035206	-0.349924	5.20907	17.9045	2.32269e-05	0.00217481	ENSMUSG00000020719	-0.441772	9.45663	27.7449	1.38411e-07	1.20989e-05	ENSMUSG00000021360	0.654635	3.19916	22.5175	2.08236e-06	0.000185981	ENSMUSG00000045466	0.681955	2.88295	26.2508	2.99824e-07	2.78436e-05	ENSMUSG00000034424	0.463671	6.72607	22.0497	2.65683e-06	0.000249499	ENSMUSG00000028988	0.613734
ENSMUSG00000038467	0.251681	7.4585	25.9054	3.58558e-07	3.51161e-05	ENSMUSG00000024188	-0.212748	6.93607	26.0299	3.36169e-07	3.33372e-05	ENSMUSG00000033671	-0.492082	6.90414	12.2171	0.000473536	0.0448734	ENSMUSG00000029571	0.417705	5.39296	17.8995	2.32887e-05	0.00217481	ENSMUSG00000036902	-1.37225	1.53594	27.742	1.38622e-07	1.20989e-05	ENSMUSG00000029408	-0.463424	4.49342	22.5171	2.0828e-06	0.000185981	ENSMUSG00000058761	-0.576663	5.66945	26.1759	3.1168e-07	2.87422e-05	ENSMUSG00000033676	1.1126	6.81458	22.0136	2.70732e-06	0.000252462	ENSMUSG00000037343	-0.554947
ENSMUSG00000033054	-0.416011	4.83254	25.8577	3.67526e-07	3.57445e-05	ENSMUSG00000074182	-0.372232	4.00667	26.0135	3.39042e-07	3.33886e-05	ENSMUSG00000030465	-0.727137	4.73206	12.1739	0.000484633	0.0450133	ENSMUSG00000022211	-0.974619	0.923992	17.8739	2.3604e-05	0.00218894	ENSMUSG00000071172	-0.532124	6.84241	27.7176	1.40379e-07	1.21671e-05	ENSMUSG00000053012	0.376887	5.34333	22.4873	2.11533e-06	0.000187574	ENSMUSG00000005483	-1.12253	5.7689	26.1263	3.19795e-07	2.92857e-05	ENSMUSG00000026972	-0.375594	4.77451	21.9677	2.77281e-06	0.000256774	ENSMUSG00000074622	-2.31243
ENSMUSG00000029135	-0.877404	5.61655	25.8336	3.7215e-07	3.59446e-05	ENSMUSG00000040229	0.639287	2.85467	25.9814	3.44722e-07	3.37138e-05	ENSMUSG00000074968	-3.93104	2.34595	12.1657	0.000486767	0.0450133	ENSMUSG00000002625	-0.49983	5.43492	17.7479	2.52195e-05	0.00231195	ENSMUSG00000034462	0.518079	5.54362	27.671	1.43803e-07	1.2378e-05	ENSMUSG00000027848	-0.498126	4.61971	22.4657	2.13931e-06	0.000188392	ENSMUSG00000061232	0.654472	7.21737	26.0341	3.35442e-07	3.05067e-05	ENSMUSG00000030556	-0.611593	4.81731	21.9424	2.80955e-06	0.000258382	ENSMUSG00000022537	1.18789
ENSMUSG00000036131	2.32256	2.21248	25.6805	4.02874e-07	3.86455e-05	ENSMUSG00000053411	-0.298186	6.38761	25.9156	3.56676e-07	3.4644e-05	ENSMUSG00000041763	-0.521831	5.90513	12.1635	0.000487328	0.0450133	ENSMUSG00000040913	-0.649908	3.24612	17.7436	2.52767e-05	0.00231195	ENSMUSG00000041476	-0.409483	7.84762	27.6003	1.49155e-07	1.27494e-05	ENSMUSG00000044496	-0.278794	5.96002	22.4437	2.164e-06	0.000189261	ENSMUSG00000070003	0.519023	4.75895	26.0102	3.39622e-07	3.06753e-05	ENSMUSG00000027346	-0.596112	5.3155	21.692	3.20131e-06	0.000292393	ENSMUSG00000032415	1.1936
ENSMUSG00000037652	-0.27362	6.38814	25.4428	4.55704e-07	4.34159e-05	ENSMUSG00000027165	0.372033	4.16881	25.897	3.60134e-07	3.47419e-05	ENSMUSG00000020308	0.558252	4.45344	12.152	0.000490341	0.0450133	ENSMUSG00000051034	0.85568	1.00058	17.722	2.55655e-05	0.00232246	ENSMUSG00000024561	-0.67337	5.73066	27.5866	1.50217e-07	1.27494e-05	ENSMUSG00000054320	-1.14116	1.06686	22.1642	2.503e-06	0.00021742	ENSMUSG00000052914	0.521771	4.70849	25.9746	3.45942e-07	3.10336e-05	ENSMUSG00000087260	0.349928	6.28716	21.6193	3.32494e-06	0.00030162	ENSMUSG00000073643	-0.415832
ENSMUSG00000031974	-0.347636	5.17772	25.1892	5.19712e-07	4.90374e-05	ENSMUSG00000028809	-0.272595	7.50259	25.8367	3.71564e-07	3.56024e-05	ENSMUSG00000046997	2.31732	1.05579	12.1472	0.000491622	0.0450133	ENSMUSG00000032295	-0.426575	5.27541	17.6248	2.69054e-05	0.00242766	ENSMUSG00000020178	0.689142	3.84847	27.5742	1.51182e-07	1.27494e-05	ENSMUSG00000014226	0.404029	5.91777	22.1277	2.55098e-06	0.000220091	ENSMUSG00000066877	0.494585	4.8656	25.9475	3.50832e-07	3.12596e-05	ENSMUSG00000044700	-0.248927	5.38643	21.5239	3.49445e-06	0.000314855	ENSMUSG00000052751	0.533896
ENSMUSG00000023460	0.267206	6.43374	25.1696	5.25041e-07	4.90374e-05	ENSMUSG00000026860	-0.238371	7.75	25.8124	3.76254e-07	3.58098e-05	ENSMUSG00000063838	0.50054	6.37466	12.1339	0.000495145	0.0450316	ENSMUSG00000028093	-0.512627	7.15553	17.5498	2.79875e-05	0.00250836	ENSMUSG00000025981	-1.34959	5.34517	27.5497	1.53112e-07	1.28254e-05	ENSMUSG00000014453	-1.08151	3.17439	22.1003	2.58768e-06	0.000221759	ENSMUSG00000022820	-0.495905	5.54687	25.8671	3.65754e-07	3.22836e-05	ENSMUSG00000020592	0.450503	3.94808	21.455	3.62225e-06	0.000324081	ENSMUSG00000052137	-0.729529
ENSMUSG00000035877	-0.291562	6.46073	25.1689	5.25213e-07	4.90374e-05	ENSMUSG00000024511	0.457134	5.04779	25.7531	3.87997e-07	3.66812e-05	ENSMUSG00000039607	-0.638801	3.41925	12.0983	0.000504682	0.045593	ENSMUSG00000047417	-0.399792	6.1348	17.4876	2.89181e-05	0.00257449	ENSMUSG00000095990	-2.0582	0.948843	27.5148	1.55895e-07	1.29715e-05	ENSMUSG00000014503	0.9912	3.21709	22.0633	2.63811e-06	0.000224574	ENSMUSG00000029482	-0.555978	8.31924	25.8594	3.6722e-07	3.22836e-05	ENSMUSG00000045482	-0.328554	6.91437	21.4428	3.64545e-06	0.000324081	ENSMUSG00000039275	-0.561911
ENSMUSG00000048827	0.802035	1.56785	25.1026	5.43592e-07	5.04173e-05	ENSMUSG00000040785	0.212174	9.92689	25.6538	4.08496e-07	3.83635e-05	ENSMUSG00000031860	1.52404	1.44182	12.0371	0.000521525	0.0467406	ENSMUSG00000053886	0.469165	4.97914	17.4448	2.95779e-05	0.00261578	ENSMUSG00000075232	-0.782685	5.66889	27.4767	1.58999e-07	1.31421e-05	ENSMUSG00000050296	-1.28315	4.19113	22.0391	2.6715e-06	0.00022591	ENSMUSG00000040829	0.797006	3.73953	25.7543	3.87769e-07	3.38643e-05	ENSMUSG00000067786	-0.906777	2.21144	21.0963	4.36766e-06	0.000385713	ENSMUSG00000024042	-1.26886
ENSMUSG00000076437	0.514554	3.68201	24.8026	6.35129e-07	5.82461e-05	ENSMUSG00000063564	-0.477587	4.46959	25.5536	4.30255e-07	4.01411e-05	ENSMUSG00000074445	1.16532	5.50223	12.0272	0.000524284	0.0467406	ENSMUSG00000031896	-4.0195	3.6467	17.3724	3.07256e-05	0.00267438	ENSMUSG00000031835	0.289248	6.13998	27.4121	1.64396e-07	1.34989e-05	ENSMUSG00000041926	-0.389689	4.58167	21.9623	2.78058e-06	0.000233587	ENSMUSG00000029273	-0.562487	9.03606	25.7259	3.9351e-07	3.41396e-05	ENSMUSG00000020601	-0.686621	6.96241	20.9863	4.62575e-06	0.000405818	ENSMUSG00000027346	-1.76173
ENSMUSG00000060657	-0.329736	7.40939	24.799	6.36319e-07	5.82461e-05	ENSMUSG00000037364	-0.305494	7.07548	25.5112	4.39817e-07	4.0765e-05	ENSMUSG00000037411	-1.37177	0.681839	12.0035	0.000530995	0.0468295	ENSMUSG00000032583	-0.435684	6.08647	17.3575	3.09667e-05	0.00267438	ENSMUSG00000046546	0.479588	5.49616	27.3537	1.69436e-07	1.38218e-05	ENSMUSG00000034652	-0.761406	2.34821	21.9017	2.86984e-06	0.00023951	ENSMUSG00000026921	0.484715	5.4935	25.6225	4.15168e-07	3.57831e-05	ENSMUSG00000019761	-0.672986	3.3874	20.946	4.72424e-06	0.00041175	ENSMUSG00000024766	-1.78253
ENSMUSG00000033020	0.286402	4.90456	24.6363	6.92334e-07	6.29619e-05	ENSMUSG00000030741	-0.205157	6.11022	25.4951	4.43507e-07	4.08401e-05	ENSMUSG00000038400	0.719107	5.2748	11.9879	0.000535482	0.0468295	ENSMUSG00000078964	-2.3638	1.16242	17.3566	3.09823e-05	0.00267438	ENSMUSG00000020608	-0.503537	6.07013	27.1041	1.9279e-07	1.56248e-05	ENSMUSG00000055137	1.39446	0.909842	21.8725	2.91386e-06	0.000241604	ENSMUSG00000021756	-0.443298	8.18108	25.5903	4.22161e-07	3.61496e-05	ENSMUSG00000062545	2.25352	3.46102	20.9314	4.76019e-06	0.000412189	ENSMUSG00000026848	-0.490126
ENSMUSG00000030335	-0.308487	5.08092	24.5552	7.22123e-07	6.52473e-05	ENSMUSG00000001249	-1.04504	2.04557	25.4167	4.61906e-07	4.22599e-05	ENSMUSG00000036097	-0.513997	4.77152	11.9814	0.000537332	0.0468295	ENSMUSG00000025007	-0.737034	7.65371	17.353	3.10415e-05	0.00267438	ENSMUSG00000025190	-0.394225	9.90358	27.0858	1.94627e-07	1.56719e-05	ENSMUSG00000031781	0.518682	6.23563	21.733	3.1336e-06	0.000256115	ENSMUSG00000059022	1.43587	3.34669	25.5581	4.2926e-07	3.65203e-05	ENSMUSG00000028357	-0.468176	7.99091	20.8857	4.87524e-06	0.000419428	ENSMUSG00000022025	-1.37794
ENSMUSG00000046982	0.449217	5.85704	24.4305	7.70395e-07	6.91627e-05	ENSMUSG00002076083	-0.416592	5.82675	25.2732	4.97568e-07	4.52309e-05	ENSMUSG00000046667	-0.976535	2.15857	11.968	0.000541208	0.0468295	ENSMUSG00000040570	0.909966	4.23859	17.2927	3.2041e-05	0.00272927	ENSMUSG00000109336	0.350459	5.35176	27.0638	1.96845e-07	1.57489e-05	ENSMUSG00000018920	-0.884063	3.80897	21.7305	3.13767e-06	0.000256115	ENSMUSG00000022234	-0.35761	7.0299	25.4959	4.43332e-07	3.74758e-05	ENSMUSG00000036093	0.353728	6.45196	20.7845	5.1397e-06	0.000436941	ENSMUSG00000057440	-0.69389
ENSMUSG00000024073	-0.313238	7.24624	24.3832	7.89523e-07	7.04285e-05	ENSMUSG00000041354	-0.46749	5.70587	25.2374	5.06898e-07	4.57069e-05	ENSMUSG00000024298	-0.640678	6.63497	11.9634	0.00054256	0.0468295	ENSMUSG00000021751	-1.84517	3.74997	17.29	3.20874e-05	0.00272927	ENSMUSG00000014226	-0.372305	6.0239	27.0194	2.01424e-07	1.60126e-05	ENSMUSG00000035311	0.503561	5.797	21.7235	3.14903e-06	0.000256115	ENSMUSG00000025937	-0.607698	9.61677	25.4826	4.46399e-07	3.74946e-05	ENSMUSG00000067656	2.00064	0.38251	20.7716	5.17434e-06	0.000436941	ENSMUSG00000021789	-1.80381
ENSMUSG00000020018	0.544197	2.38973	24.3567	8.0047e-07	7.09531e-05	ENSMUSG00000023911	0.411901	3.55084	25.2285	5.09252e-07	4.57069e-05	ENSMUSG00000025326	-0.460088	5.77394	11.9331	0.000551462	0.0472966	ENSMUSG00000052485	-1.04736	3.79229	17.2231	3.32377e-05	0.00280922	ENSMUSG00000034708	0.35382	6.63847	26.9947	2.04019e-07	1.60742e-05	ENSMUSG00000039680	0.440871	4.11215	21.7094	3.17227e-06	0.000256371	ENSMUSG00000067369	-0.360299	5.61898	25.4481	4.54453e-07	3.79296e-05	ENSMUSG00000090817	0.911011	6.26783	20.766	5.18962e-06	0.000436941	ENSMUSG00000032064	0.698377
ENSMUSG00000041911	0.838388	4.1817	24.328	8.12509e-07	7.15672e-05	ENSMUSG00000028030	0.346443	4.92715	25.2028	5.16073e-07	4.60279e-05	ENSMUSG00000037857	-0.453646	6.20306	11.884	0.000566167	0.0479708	ENSMUSG00000028024	0.924891	10.6584	17.1639	3.42898e-05	0.00287991	ENSMUSG00000054206	-0.731498	2.72969	26.9875	2.04775e-07	1.60742e-05	ENSMUSG00000029108	0.335971	7.01085	21.6581	3.25837e-06	0.000260126	ENSMUSG00000021079	-0.391338	5.05716	25.3741	4.72217e-07	3.91643e-05	ENSMUSG00000034342	-0.464657	6.0497	20.751	5.23056e-06	0.000436941	ENSMUSG00000022462	-1.19092
ENSMUSG00000032562	0.252918	7.68162	24.2575	8.42762e-07	7.32544e-05	ENSMUSG00000021361	0.469157	4.94989	25.1653	5.26213e-07	4.64903e-05	ENSMUSG00000066798	-0.464328	4.87881	11.8686	0.00057088	0.0479708	ENSMUSG00000021710	0.483014	5.01564	17.1252	3.49941e-05	0.00292069	ENSMUSG00000058318	0.357062	4.75083	26.9435	2.09491e-07	1.63416e-05	ENSMUSG00000031482	0.412678	4.20299	21.6574	3.25947e-06	0.000260126	ENSMUSG00000055319	-0.295258	5.51023	25.0945	5.45896e-07	4.4992e-05	ENSMUSG00000073421	-1.55476	6.17957	20.7465	5.24263e-06	0.000436941	ENSMUSG00000001627	-0.949344
ENSMUSG00000033792	-0.513903	3.0415	24.2377	8.51498e-07	7.32544e-05	ENSMUSG00000023952	-0.293862	6.45516	25.1594	5.27814e-07	4.64903e-05	ENSMUSG00000047888	-0.48408	6.36539	11.862	0.000572904	0.0479708	ENSMUSG00000040312	-0.633223	3.79874	17.0977	3.5506e-05	0.00294501	ENSMUSG00000028603	-0.330571	7.80895	26.808	2.24701e-07	1.74192e-05	ENSMUSG00000029223	1.24482	2.87635	21.6103	3.34057e-06	0.000264942	ENSMUSG00000052316	2.99995	1.86472	25.0548	5.57225e-07	4.56405e-05	ENSMUSG00000027201	-0.55486	4.35273	20.6621	5.47892e-06	0.000453797	ENSMUSG00000064262	0.840753
ENSMUSG00000024780	-0.295002	7.08356	24.2376	8.51525e-07	7.32544e-05	ENSMUSG00000033253	-0.285179	6.47144	25.0899	5.47178e-07	4.7761e-05	ENSMUSG00000022788	-0.645913	6.19425	11.8601	0.000573483	0.0479708	ENSMUSG00000027351	0.552068	4.601	17.0234	3.69225e-05	0.0030436	ENSMUSG00000036611	0.634383	4.97411	26.7931	2.26446e-07	1.74461e-05	ENSMUSG00000002147	-0.259267	6.34486	21.5438	3.45836e-06	0.000272591	ENSMUSG00000045636	-0.468862	7.73478	25.023	5.66495e-07	4.61134e-05	ENSMUSG00000049313	-0.434384	7.20472	20.5368	5.84945e-06	0.000481497	ENSMUSG00000089774	-1.06319
ENSMUSG00000072941	0.516769	3.54542	24.2248	8.5723e-07	7.32544e-05	ENSMUSG00000047361	0.571289	2.89214	25.0836	5.48977e-07	4.7761e-05							ENSMUSG00000024766	1.86502	2.89776	16.9824	3.77283e-05	0.00307351	ENSMUSG00000068874	0.428806	6.50209	26.7636	2.29926e-07	1.76056e-05	ENSMUSG00000020102	-1.59743	3.7689	21.5216	3.49864e-06	0.000274075	ENSMUSG00000028214	-0.880642	2.95141	24.9976	5.74026e-07	4.64397e-05	ENSMUSG00000026927	0.268305	6.19208	20.5156	5.91467e-06	0.000483878	ENSMUSG00000022831	0.998237
ENSMUSG00000049036	0.344292	4.01969	24.2234	8.57816e-07	7.32544e-05	ENSMUSG00000032298	-0.475667	3.66744	25.0201	5.67363e-07	4.88878e-05							ENSMUSG00000028357	-0.812352	1.80844	16.9687	3.8002e-05	0.00307351	ENSMUSG00000063229	-0.378821	9.50688	26.7307	2.33876e-07	1.77988e-05	ENSMUSG00000047443	3.29982	0.4518	21.4496	3.63258e-06	0.000282832	ENSMUSG00000025980	-0.370175	9.28973	24.9694	5.82472e-07	4.66278e-05	ENSMUSG00000063406	0.479373	4.84972	20.4439	6.14064e-06	0.000499302	ENSMUSG00000049957	-0.788271
ENSMUSG00000050201	1.38508	0.566336	24.2036	8.66719e-07	7.35661e-05	ENSMUSG00000022752	0.255813	7.79905	25.0151	5.68823e-07	4.88878e-05							ENSMUSG00000022947	-2.36125	2.30186	16.9614	3.8147e-05	0.00307351	ENSMUSG00000040183	-0.999555	2.56954	26.6498	2.43881e-07	1.84477e-05	ENSMUSG00000022704	0.624571	3.73829	21.4175	3.69394e-06	0.000285866	ENSMUSG00000038250	-0.452712	4.69751	24.9663	5.83422e-07	4.66278e-05	ENSMUSG00000047735	-0.57329	6.68505	20.3939	6.3029e-06	0.000509389	ENSMUSG00000039246	-0.783866
ENSMUSG00000063694	-0.209497	6.33754	24.1759	8.79245e-07	7.41797e-05	ENSMUSG00000043923	-0.414453	3.93274	24.9762	5.80422e-07	4.95841e-05							ENSMUSG00000020594	0.363315	7.12145	16.9585	3.8206e-05	0.00307351	ENSMUSG00000035172	0.485397	4.90887	26.6321	2.46125e-07	1.85053e-05	ENSMUSG00000057411	0.42754	4.09474	21.3545	3.81724e-06	0.000293628	ENSMUSG00000036751	-0.416133	8.33259	24.9335	5.93427e-07	4.71417e-05	ENSMUSG00000039929	-0.406465	3.81256	20.3665	6.39378e-06	0.000513621	ENSMUSG00000044468	-1.16277
ENSMUSG00000021488	-0.27319	7.67637	24.026	9.50453e-07	7.97071e-05	ENSMUSG00000024160	-0.415861	3.71661	24.8418	6.22322e-07	5.28452e-05							ENSMUSG00000033847	3.60768	3.34678	16.9463	3.84515e-05	0.00307474	ENSMUSG00000054252	-0.651457	3.79358	26.4606	2.68967e-07	2.01017e-05	ENSMUSG00000029838	-0.977273	2.00585	21.3198	3.8869e-06	0.000297197	ENSMUSG00000048826	0.620638	4.37776	24.7334	6.58334e-07	5.19049e-05	ENSMUSG00000026715	-1.28868	2.01514	20.2781	6.69618e-06	0.000534692	ENSMUSG00000027502	0.482723
ENSMUSG00000045193	0.401976	6.63092	23.9796	9.73639e-07	8.11655e-05	ENSMUSG00000026958	-0.277237	5.04182	24.8232	6.2836e-07	5.30403e-05							ENSMUSG00000006676	-0.327227	6.8838	16.9127	3.91392e-05	0.0031111	ENSMUSG00000032712	-0.789069	4.5696	26.4472	2.70836e-07	2.01208e-05	ENSMUSG00000057497	0.37426	4.8778	21.2589	4.01247e-06	0.000304972	ENSMUSG00000034220	-0.915586	5.27703	24.7192	6.63202e-07	5.19049e-05	ENSMUSG00000009145	-0.456044	4.54443	20.266	6.73892e-06	0.000534901	ENSMUSG00000027359	-0.689092
ENSMUSG00000027375	-0.302124	7.49382	23.9507	9.8832e-07	8.19019e-05	ENSMUSG00000070808	-0.266988	5.41741	24.7703	6.45844e-07	5.41936e-05							ENSMUSG00000039745	-0.723329	5.40911	16.8909	3.95903e-05	0.00312834	ENSMUSG00000006782	0.513623	3.4017	26.425	2.73977e-07	2.02338e-05	ENSMUSG00000024421	-0.825063	2.62765	21.1184	4.31773e-06	0.000326232	ENSMUSG00000031938	-0.467917	9.68823	24.7134	6.65195e-07	5.19049e-05	ENSMUSG00000038312	0.282348	5.50925	20.2305	6.86487e-06	0.000541675	ENSMUSG00000019916	-1.23167
ENSMUSG00000003352	0.317985	7.79026	23.9046	1.0123e-06	8.30343e-05	ENSMUSG00000031483	0.188889	5.96819	24.6978	6.70609e-07	5.59406e-05							ENSMUSG00000005268	0.486364	6.93674	16.878	3.98601e-05	0.00313113	ENSMUSG00000042508	-0.413998	4.57074	26.4044	2.76911e-07	2.03302e-05	ENSMUSG00000039218	-0.276474	8.55359	21.0259	4.53107e-06	0.000340336	ENSMUSG00000024901	0.785855	1.69259	24.671	6.79983e-07	5.27467e-05	ENSMUSG00000042662	-0.642856	4.60968	20.1992	6.9783e-06	0.000547386	ENSMUSG00000006777	-2.0989
ENSMUSG00000047669	0.426431	3.99619	23.9005	1.01444e-06	8.30343e-05	ENSMUSG00000034892	0.254125	7.00778	24.6254	6.96289e-07	5.77431e-05							ENSMUSG00000063268	-0.453118	5.78105	16.8541	4.03652e-05	0.00315226	ENSMUSG00000028229	-0.442409	5.03462	26.3155	2.89952e-07	2.10808e-05	ENSMUSG00000040907	-1.80081	1.26399	20.9263	4.77296e-06	0.000356409	ENSMUSG00000066735	-0.358003	5.33401	24.6425	6.90122e-07	5.32201e-05	ENSMUSG00000001467	0.805313	8.99337	20.1363	7.21131e-06	0.000560958	ENSMUSG00000036887	0.927067
ENSMUSG00000036138	0.599757	5.51625	23.888	1.02105e-06	8.30343e-05	ENSMUSG00000040112	0.333638	4.60373	24.6031	7.04366e-07	5.80734e-05							ENSMUSG00000007029	-0.758791	6.29724	16.8281	4.09231e-05	0.00317725	ENSMUSG00000021508	1.52322	5.39458	26.3118	2.90514e-07	2.10808e-05	ENSMUSG00000020091	0.295176	7.34873	20.8682	4.91983e-06	0.00036524	ENSMUSG00000021416	-0.812798	7.72753	24.6262	6.95978e-07	5.33597e-05	ENSMUSG00000028247	0.440642	4.3974	20.13	7.23545e-06	0.000560958	ENSMUSG00000046245	3.9434
ENSMUSG00000037408	-0.310806	4.31966	23.8793	1.0257e-06	8.30343e-05	ENSMUSG00000036760	-0.262797	7.22061	24.5836	7.11545e-07	5.83262e-05							ENSMUSG00000042632	-0.583208	5.55073	16.8088	4.13418e-05	0.00319121	ENSMUSG00000028842	-0.508755	4.58349	26.1909	3.09282e-07	2.22588e-05	ENSMUSG00000029007	0.411739	5.97935	20.8305	5.01787e-06	0.000370365	ENSMUSG00000021772	0.407484	5.05719	24.6056	7.03479e-07	5.3623e-05	ENSMUSG00000060733	-0.601967	7.10198	20.092	7.38045e-06	0.000568892	ENSMUSG00000046470	0.808931
ENSMUSG00000020108	-0.549462	5.64777	23.8259	1.05454e-06	8.48783e-05	ENSMUSG00000036699	0.333227	6.6768	24.5578	7.2115e-07	5.87737e-05							ENSMUSG00000069835	-1.41166	1.20129	16.7631	4.23485e-05	0.00322768	ENSMUSG00000059811	-0.374192	5.69982	26.1844	3.10314e-07	2.22588e-05	ENSMUSG00000023960	0.384571	4.78266	20.7979	5.10398e-06	0.000374556	ENSMUSG00000030034	0.493298	4.17919	24.5792	7.13175e-07	5.40497e-05	ENSMUSG00000021311	-0.374516	5.43863	20.0615	7.49916e-06	0.00057472	ENSMUSG00000022704	-0.680032
ENSMUSG00000047485	-0.307035	5.56935	23.7884	1.07528e-06	8.60528e-05	ENSMUSG00000066191	-0.349508	4.4499	24.4954	7.4487e-07	6.036e-05							ENSMUSG00000030031	0.72718	2.10697	16.756	4.25086e-05	0.00322768	ENSMUSG00000024097	-0.409922	5.72343	26.0168	3.38466e-07	2.41394e-05	ENSMUSG00000041607	-0.933659	3.36349	20.659	5.48791e-06	0.000400429	ENSMUSG00000028405	-0.466166	9.16123	24.4947	7.45164e-07	5.61513e-05	ENSMUSG00000015013	0.274762	4.90647	19.9241	8.0577e-06	0.000607679	ENSMUSG00000034158	-0.442929
ENSMUSG00000034832	-0.280599	6.61204	23.7541	1.09464e-06	8.71047e-05	ENSMUSG00000025086	0.42444	4.6427	24.4378	7.67479e-07	6.18387e-05							ENSMUSG00000025650	-1.18742	2.2456	16.7447	4.2762e-05	0.00322768	ENSMUSG00000020309	-0.499123	3.96947	25.9893	3.43323e-07	2.41991e-05	ENSMUSG00000041734	-0.466364	4.36071	20.5789	5.72228e-06	0.000415158	ENSMUSG00000027035	-0.436686	6.89445	24.4733	7.53475e-07	5.64122e-05	ENSMUSG00000012187	0.891578	6.61924	19.9154	8.0946e-06	0.000607679	ENSMUSG00000030302	2.24821
ENSMUSG00000055373	-0.493208	7.00999	23.6969	1.12764e-06	8.92235e-05	ENSMUSG00000038593	-0.348577	4.34979	24.4201	7.74554e-07	6.20562e-05							ENSMUSG00000025626	0.545442	3.99269	16.7438	4.27812e-05	0.00322768	ENSMUSG00000017493	0.51677	6.6009	25.9834	3.44372e-07	2.41991e-05	ENSMUSG00000025893	0.45196	3.34804	20.4467	6.13154e-06	0.000442337	ENSMUSG00000021037	-0.379068	6.19015	24.4638	7.57182e-07	5.64122e-05	ENSMUSG00000026304	0.430264	5.86912	19.9091	8.12149e-06	0.000607679	ENSMUSG00000018666	0.335011
ENSMUSG00000043467	-0.472995	4.53855	23.6347	1.16471e-06	9.1639e-05	ENSMUSG00000040710	0.378312	3.92078	24.4083	7.79335e-07	6.20885e-05							ENSMUSG00000047507	-0.881625	2.4414	16.7329	4.3028e-05	0.00322806	ENSMUSG00000020889	0.814982	7.49214	25.9792	3.4512e-07	2.41991e-05	ENSMUSG00000031119	-0.417801	5.48526	20.3263	6.52978e-06	0.00046842	ENSMUSG00000020572	-0.457767	7.19269	24.4357	7.68335e-07	5.66637e-05	ENSMUSG00000026090	-1.00098	1.2666	19.9079	8.12647e-06	0.000607679	ENSMUSG00000044359	1.0169
ENSMUSG00000020397	-0.327653	3.87502	23.5752	1.20125e-06	9.35189e-05	ENSMUSG00000024245	-0.270062	6.0896	24.3605	7.9892e-07	6.32932e-05							ENSMUSG00000035896	-3.4476	3.82992	16.7184	4.33575e-05	0.00323462	ENSMUSG00000029655	-0.469985	5.07044	25.8758	3.64113e-07	2.53883e-05	ENSMUSG00000019846	-0.344968	6.76153	20.2988	6.62414e-06	0.000472534	ENSMUSG00000025041	-0.417962	6.75124	24.4319	7.6982e-07	5.66637e-05	ENSMUSG00000020836	-0.809811	2.38318	19.9007	8.15707e-06	0.000607679	ENSMUSG00000078453	0.722767
ENSMUSG00000037216	0.979729	2.22609	23.5741	1.20196e-06	9.35189e-05	ENSMUSG00000026456	0.388426	4.25751	24.3116	8.19435e-07	6.45578e-05							ENSMUSG00000027610	0.464913	6.33594	16.686	4.4106e-05	0.00327218	ENSMUSG00000021314	1.25088	1.23761	25.8434	3.70263e-07	2.56736e-05	ENSMUSG00000009210	-1.37375	0.553305	20.2422	6.82322e-06	0.000483312	ENSMUSG00000022772	-0.503419	5.13327	24.4229	7.73448e-07	5.66637e-05	ENSMUSG00000037649	-1.28381	3.2932	19.8806	8.24333e-06	0.000610693	ENSMUSG00000024621	0.796794
ENSMUSG00000020307	0.252104	5.21704	23.4856	1.25854e-06	9.73804e-05	ENSMUSG00000059003	0.417887	7.4282	24.2949	8.26565e-07	6.47597e-05							ENSMUSG00000032253	0.598062	5.01013	16.6217	4.56259e-05	0.00334232	ENSMUSG00000045045	0.639049	4.48437	25.636	4.12278e-07	2.8429e-05	ENSMUSG00000029376	0.559697	2.82965	20.2344	6.85093e-06	0.000483312	ENSMUSG00000075702	0.758946	4.75505	24.3841	7.8916e-07	5.74953e-05	ENSMUSG00000021509	-0.578854	6.05703	19.8084	8.5605e-06	0.000630687	ENSMUSG00000046169	1.53061
ENSMUSG00000069833	-0.552877	5.39563	23.4561	1.27794e-06	9.83381e-05	ENSMUSG00000047767	-0.3614	4.62918	24.2775	8.34092e-07	6.49905e-05							ENSMUSG00000027809	-0.456868	6.91034	16.6171	4.57379e-05	0.00334232	ENSMUSG00000026021	-0.413773	5.18162	25.536	4.342e-07	2.97761e-05	ENSMUSG00000029528	-0.256396	6.38796	20.2094	6.94109e-06	0.000486982	ENSMUSG00000005374	-0.441235	4.60939	24.373	7.93723e-07	5.751e-05	ENSMUSG00000029480	-0.295851	4.30914	19.7602	8.77928e-06	0.000643251	ENSMUSG00000006219	1.18309
ENSMUSG00000050856	-0.334657	6.07384	23.4222	1.30072e-06	9.94475e-05	ENSMUSG00000034820	-0.234489	6.6514	24.1478	8.92157e-07	6.91349e-05							ENSMUSG00000026335	0.606094	5.70781	16.6137	4.58194e-05	0.00334232	ENSMUSG00000024664	0.438217	5.81677	25.469	4.49555e-07	3.06607e-05	ENSMUSG00000029752	-0.78957	1.78476	20.1717	7.07934e-06	0.000493968	ENSMUSG00000045193	0.663784	6.13917	24.1965	8.69907e-07	6.26856e-05	ENSMUSG00000090145	1.62807	1.57487	19.7001	9.05979e-06	0.000659633	ENSMUSG00000029446	-0.599536
ENSMUSG00000048967	0.654225	3.23354	23.4135	1.30656e-06	9.94475e-05	ENSMUSG00000027358	0.627945	2.21768	24.0972	9.15954e-07	7.05932e-05							ENSMUSG00000066324	0.406009	6.4968	16.604	4.60526e-05	0.00334232	ENSMUSG00000024613	0.371306	4.93367	25.4339	4.57795e-07	3.10529e-05	ENSMUSG00000052151	-0.819445	1.40579	20.1265	7.24839e-06	0.000503015	ENSMUSG00000047221	-0.724936	4.06843	24.1599	8.86594e-07	6.35409e-05	ENSMUSG00000069094	0.339581	5.13062	19.6912	9.1018e-06	0.000659633	ENSMUSG00000026434	-0.499014
ENSMUSG00000056895	0.377307	3.88831	23.3792	1.3301e-06	0.000100692	ENSMUSG00000034780	0.282936	5.60093	24.0041	9.6132e-07	7.32668e-05							ENSMUSG00000058135	-1.27101	7.96991	16.5887	4.64272e-05	0.00334308	ENSMUSG00000059920	-0.408574	4.85507	25.4214	4.60781e-07	3.10731e-05	ENSMUSG00000068686	-1.97263	1.42794	20.1129	7.30023e-06	0.000503873	ENSMUSG00000074358	0.474523	3.63621	24.131	9.00015e-07	6.4154e-05	ENSMUSG00000027890	-0.581082	4.03939	19.6698	9.20457e-06	0.000663476	ENSMUSG00000062198	-0.811465
ENSMUSG00000066842	-0.942498	3.20995	23.2568	1.41746e-06	0.000106728	ENSMUSG00000033276	-0.515485	3.29523	23.9966	9.65045e-07	7.32668e-05							ENSMUSG00000038884	-0.758548	3.36344	16.5831	4.65637e-05	0.00334308	ENSMUSG00000113255	-1.77283	0.890085	25.4118	4.63071e-07	3.10731e-05	ENSMUSG00000015804	0.345788	5.13979	20.0961	7.36454e-06	0.000504306	ENSMUSG00000021364	-1.47092	6.64459	24.1191	9.0557e-07	6.4203e-05	ENSMUSG00000038593	-0.344053	4.18291	19.5633	9.73216e-06	0.00069492	ENSMUSG00000063362	-0.432995
ENSMUSG00000054499	-0.369709	5.03163	23.2155	1.44824e-06	0.000108463	ENSMUSG00000093904	0.234847	8.141	23.9861	9.7033e-07	7.32668e-05							ENSMUSG00000026708	0.567481	3.70365	16.5669	4.69644e-05	0.00335381	ENSMUSG00000018042	0.298532	6.57012	25.3285	4.83502e-07	3.22705e-05	ENSMUSG00000041841	0.349479	6.43197	20.0888	7.39286e-06	0.000504306	ENSMUSG00000020593	-0.80359	6.64868	24.0422	9.42451e-07	6.64605e-05	ENSMUSG00000028392	-0.556147	5.94116	19.5607	9.74541e-06	0.00069492	ENSMUSG00000029623	0.353559
ENSMUSG00000031958	0.445424	4.16988	23.1966	1.46256e-06	0.000108953	ENSMUSG00000038534	-0.353258	4.54798	23.9842	9.7131e-07	7.32668e-05							ENSMUSG00000025757	0.523726	4.63806	16.5228	4.80677e-05	0.00341434	ENSMUSG00000076437	0.504834	3.47922	25.2961	4.91691e-07	3.2552e-05	ENSMUSG00000046442	0.689005	4.65032	20.0801	7.42662e-06	0.000504306	ENSMUSG00000030199	-0.513798	6.2705	23.9707	9.7811e-07	6.86081e-05	ENSMUSG00000022516	0.344359	5.0238	19.5506	9.79714e-06	0.00069492	ENSMUSG00000021594	-0.650017
ENSMUSG00000079523	0.31894	6.93663	23.0186	1.6044e-06	0.000118237	ENSMUSG00000078877	5.24428	0.917542	23.9469	9.9028e-07	7.43025e-05							ENSMUSG00000058704	0.403401	4.23807	16.5001	4.86484e-05	0.0034373	ENSMUSG00000050211	1.10626	3.07538	25.2882	4.9373e-07	3.2552e-05	ENSMUSG00000035493	-0.611778	4.5451	20.0704	7.46448e-06	0.000504306	ENSMUSG00000018846	-0.606255	7.13789	23.9416	9.93036e-07	6.92866e-05	ENSMUSG00000022962	-0.367253	5.4806	19.536	9.872e-06	0.000696524	ENSMUSG00000034918	-2.4789
ENSMUSG00000059921	-0.37675	5.5932	23.0173	1.60549e-06	0.000118237	ENSMUSG00000025280	-0.670496	5.58918	23.8602	1.03591e-06	7.73172e-05							ENSMUSG00000032373	1.61313	4.85304	16.4794	4.91806e-05	0.00345662	ENSMUSG00000041124	-0.373181	5.98255	25.2712	4.98084e-07	3.2552e-05	ENSMUSG00000022701	0.625819	2.31807	20.0544	7.52696e-06	0.000505851	ENSMUSG00000004018	0.624989	2.68908	23.9036	1.0128e-06	7.02938e-05	ENSMUSG00000034255	-0.338336	5.7183	19.4897	1.01142e-05	0.000709086	ENSMUSG00000043068	1.21788
ENSMUSG00000003531	0.367961	5.00802	23.0089	1.61251e-06	0.000118237	ENSMUSG00000040236	-0.232308	5.14013	23.8053	1.06589e-06	7.91384e-05							ENSMUSG00000021684	0.736226	3.54248	16.4323	5.04197e-05	0.00352419	ENSMUSG00000005373	-0.463497	5.28654	25.2631	5.00187e-07	3.2552e-05	ENSMUSG00000051234	0.29671	5.85808	19.9804	7.82393e-06	0.000523056	ENSMUSG00000039376	1.45639	1.30671	23.829	1.05286e-06	7.25381e-05	ENSMUSG00000035443	0.36901	4.20135	19.4784	1.01743e-05	0.000709086	ENSMUSG00000026112	-0.376008
ENSMUSG00000041881	0.23043	5.54054	22.959	1.65492e-06	0.000120715	ENSMUSG00000064293	0.283492	5.60522	23.7651	1.0884e-06	8.03887e-05							ENSMUSG00000037465	0.586652	5.20499	16.4219	5.06949e-05	0.00352419	ENSMUSG00000039958	-0.743886	3.58513	25.2609	5.00761e-07	3.2552e-05	ENSMUSG00000028165	0.387527	6.6567	19.9678	7.87573e-06	0.000523777	ENSMUSG00000040548	-0.413804	7.37966	23.823	1.05614e-06	7.25381e-05	ENSMUSG00000024143	0.352678	5.72839	19.4718	1.02096e-05	0.000709086	ENSMUSG00000021257	0.548045
ENSMUSG00000048546	-0.532835	5.59833	22.8456	1.75549e-06	0.000127387	ENSMUSG00000029402	0.428386	4.03774	23.7416	1.10173e-06	8.09517e-05							ENSMUSG00000074261	-0.505704	6.40957	16.413	5.09337e-05	0.00352419	ENSMUSG00000034158	-0.592154	6.18294	25.2267	5.09728e-07	3.29633e-05	ENSMUSG00000039285	0.319004	6.34007	19.9449	7.97048e-06	0.000527332	ENSMUSG00000027887	-0.572747	6.57045	23.7987	1.06957e-06	7.30798e-05	ENSMUSG00000033634	-1.23054	5.59079	19.4565	1.02915e-05	0.000711073	ENSMUSG00000036896	0.886255
ENSMUSG00000028125	-0.770372	2.82154	22.7812	1.81536e-06	0.000131052	ENSMUSG00000031983	0.259858	6.78217	23.6898	1.13181e-06	8.27329e-05							ENSMUSG00000024507	-0.73037	8.35652	16.3668	5.21919e-05	0.00359263	ENSMUSG00000040006	-0.501291	6.29558	25.1981	5.17333e-07	3.31893e-05	ENSMUSG00000053985	0.858581	2.53899	19.8087	8.55935e-06	0.000562824	ENSMUSG00000032244	-0.406564	5.62299	23.7865	1.07637e-06	7.31653e-05	ENSMUSG00000050854	-0.566808	4.73278	19.4117	1.0536e-05	0.000723933	ENSMUSG00000028300	-0.661766
ENSMUSG00000004892	0.246538	8.42805	22.5686	2.02776e-06	0.00014421	ENSMUSG00000020888	-0.413366	4.96443	23.6711	1.14286e-06	8.29028e-05							ENSMUSG00000021918	-0.614622	3.64395	16.3162	5.36025e-05	0.00367081	ENSMUSG00000051817	0.622288	5.25127	25.1936	5.18542e-07	3.31893e-05	ENSMUSG00000027805	0.414832	5.16548	19.793	8.62971e-06	0.000562824	ENSMUSG00000026188	1.24857	3.54357	23.7744	1.08311e-06	7.32459e-05	ENSMUSG00000025127	-0.548034	5.34001	19.3998	1.0602e-05	0.000723933	ENSMUSG00000049866	0.96215
ENSMUSG00000053929	0.25329	5.48415	22.5679	2.02849e-06	0.00014421	ENSMUSG00000052298	0.268496	7.166	23.6623	1.1481e-06	8.29028e-05							ENSMUSG00000029469	0.966329	1.96216	16.2246	5.62575e-05	0.00383297	ENSMUSG00000027424	0.520074	4.21699	25.1812	5.21898e-07	3.32337e-05	ENSMUSG00000062151	-2.30834	0.818513	19.7822	8.67862e-06	0.000562824	ENSMUSG00000005882	-0.385683	6.24522	23.7247	1.11149e-06	7.4782e-05	ENSMUSG00000060317	1.16982	6.4513	19.3928	1.06405e-05	0.000723933	ENSMUSG00000052934	-1.04486
ENSMUSG00000016940	0.248108	5.88914	22.565	2.03149e-06	0.00014421	ENSMUSG00000020926	-0.353434	8.08538	23.6563	1.15167e-06	8.29028e-05							ENSMUSG00000032092	-0.54931	4.32649	16.2012	5.6958e-05	0.003861	ENSMUSG00000033364	-0.427534	3.96486	25.094	5.46036e-07	3.45943e-05	ENSMUSG00000015749	0.436427	6.80306	19.7735	8.71815e-06	0.000562824	ENSMUSG00000040209	0.525308	5.93232	23.6491	1.15601e-06	7.73826e-05	ENSMUSG00000014907	-0.380324	4.32611	19.2211	1.16418e-05	0.000788035	ENSMUSG00000039633	-0.997915
ENSMUSG00000051146	0.208297	7.38308	22.5492	2.04826e-06	0.00014421	ENSMUSG00000001380	0.208345	6.55871	23.6342	1.16497e-06	8.34365e-05							ENSMUSG00000046314	0.628753	4.11333	16.1322	5.90716e-05	0.00398405	ENSMUSG00000053286	-0.342935	4.87518	25.0714	5.52454e-07	3.48241e-05	ENSMUSG00000002846	0.29882	5.6073	19.7678	8.74431e-06	0.000562824	ENSMUSG00000001751	0.371691	6.07126	23.5947	1.18916e-06	7.91995e-05	ENSMUSG00000079547	-1.48118	2.67559	19.1933	1.18128e-05	0.000794322	ENSMUSG00000001751	0.607344
ENSMUSG00000025949	-0.331929	6.11813	22.5484	2.0491e-06	0.00014421	ENSMUSG00000023473	-0.355286	7.56716	23.586	1.19453e-06	8.46179e-05							ENSMUSG00000073542	0.597315	3.34787	16.0975	6.01637e-05	0.00403732	ENSMUSG00000023927	0.426053	5.20261	25.0404	5.61423e-07	3.52117e-05	ENSMUSG00000027427	0.296601	4.24882	19.7619	8.7714e-06	0.000562824	ENSMUSG00000037211	0.687647	4.87656	23.5264	1.2321e-06	8.13921e-05	ENSMUSG00000028937	0.582661	4.15801	19.1867	1.18538e-05	0.000794322	ENSMUSG00000032010	-3.38782
ENSMUSG00000057469	-0.29938	5.1578	22.4754	2.12854e-06	0.000149051	ENSMUSG00000069631	-0.28656	5.31353	23.5828	1.1965e-06	8.46179e-05							ENSMUSG00000003200	-0.331964	6.13879	16.0794	6.07414e-05	0.0040557	ENSMUSG00000020534	-0.904504	3.20816	24.9938	5.75141e-07	3.58917e-05	ENSMUSG00000035372	0.544167	3.1718	19.7111	9.00762e-06	0.000575091	ENSMUSG00000092212	-1.38553	1.6848	23.5228	1.23443e-06	8.13921e-05	ENSMUSG00000001380	0.281861	5.74593	19.0263	1.28929e-05	0.000856558	ENSMUSG00000093803	0.39832
ENSMUSG00000030393	-0.405094	4.04659	22.4059	2.20694e-06	0.000153772	ENSMUSG00000072572	-0.861365	2.25649	23.5782	1.19937e-06	8.46179e-05							ENSMUSG00000070808	-0.373673	5.59845	16.0215	6.26277e-05	0.00416085	ENSMUSG00000073664	-0.488973	5.87323	24.9452	5.89841e-07	3.66259e-05	ENSMUSG00000038976	-0.316027	6.61069	19.3668	1.07868e-05	0.000685257	ENSMUSG00000029136	-0.505706	3.96158	23.5067	1.24477e-06	8.16658e-05	ENSMUSG00000060177	3.68333	2.63106	19.0196	1.29386e-05	0.000856558	ENSMUSG00000033060	-0.604688
ENSMUSG00000037234	-0.337298	6.43787	22.3949	2.2196e-06	0.000153888	ENSMUSG00000022682	0.202836	6.0542	23.5599	1.21082e-06	8.50033e-05							ENSMUSG00000027665	0.397384	5.76372	15.9971	6.34403e-05	0.00419397	ENSMUSG00000025105	1.41998	0.735945	24.8991	6.04101e-07	3.73256e-05	ENSMUSG00000061288	-0.492198	3.87866	19.354	1.08589e-05	0.000686422	ENSMUSG00000054263	-0.597721	7.21524	23.4771	1.26408e-06	8.25217e-05	ENSMUSG00000041571	0.696278	5.21282	19.0142	1.29752e-05	0.000856558	ENSMUSG00000059772	0.710999
ENSMUSG00000007989	-0.496477	6.80847	22.3556	2.2655e-06	0.000156297	ENSMUSG00000031706	-0.345985	5.53544	23.5098	1.24277e-06	8.65947e-05							ENSMUSG00000020549	-0.493305	4.27024	15.9843	6.38714e-05	0.00420167	ENSMUSG00000023353	0.326169	6.23106	24.8303	6.26059e-07	3.84918e-05	ENSMUSG00000071984	-0.801636	4.74295	19.3058	1.11368e-05	0.000700523	ENSMUSG00000028261	-0.486321	5.69265	23.452	1.28069e-06	8.31946e-05	ENSMUSG00000037971	-0.423956	4.98882	19.0011	1.30641e-05	0.000858177	ENSMUSG00000026640	0.685613
ENSMUSG00000024241	-0.293123	6.32831	22.2839	2.3517e-06	0.000161449	ENSMUSG00000090659	0.883639	1.70187	23.5053	1.2457e-06	8.65947e-05							ENSMUSG00000048970	0.493267	5.16798	15.8901	6.71288e-05	0.00439431	ENSMUSG00000046658	0.56193	4.01017	24.6246	6.96576e-07	4.26175e-05	ENSMUSG00000015013	0.317508	4.53447	19.2728	1.1331e-05	0.000709243	ENSMUSG00000021281	0.530563	5.59299	23.4378	1.29021e-06	8.3402e-05	ENSMUSG00000026360	0.620025	3.79093	18.8016	1.45047e-05	0.000948139	ENSMUSG00000040345	0.75909
ENSMUSG00000041697	0.216201	8.04894	22.2365	2.41053e-06	0.000164385	ENSMUSG00000109378	-0.851973	2.3474	23.4689	1.26948e-06	8.78168e-05							ENSMUSG00000005802	0.506623	6.88503	15.8639	6.8063e-05	0.00443372	ENSMUSG00000038248	0.421789	5.39426	24.5553	7.22073e-07	4.39619e-05	ENSMUSG00000051224	0.701405	1.72729	19.2592	1.14117e-05	0.000710812	ENSMUSG00000006134	-0.333524	5.73234	23.3919	1.32137e-06	8.49994e-05	ENSMUSG00000004151	-0.957181	4.84551	18.7306	1.50545e-05	0.000979276	ENSMUSG00000028842	-0.492837
ENSMUSG00000021453	-0.512252	4.05464	22.2306	2.41794e-06	0.000164385	ENSMUSG00000063887	0.357701	5.96145	23.4083	1.31009e-06	9.01864e-05							ENSMUSG00000029036	-0.47581	6.12573	15.8149	6.9849e-05	0.00452798	ENSMUSG00000020935	0.513926	5.81623	24.447	7.63841e-07	4.62791e-05	ENSMUSG00000026639	-0.89139	4.58097	19.2313	1.15799e-05	0.000717006	ENSMUSG00000005447	0.759117	3.45594	23.3064	1.38139e-06	8.84288e-05	ENSMUSG00000072676	-0.415503	6.55856	18.6752	1.54982e-05	0.00100325	ENSMUSG00000023025	-0.47103
ENSMUSG00000054428	0.325436	5.34726	22.2119	2.44158e-06	0.00016519	ENSMUSG00000022013	0.364952	6.07394	23.3939	1.31996e-06	9.01941e-05							ENSMUSG00000010080	-0.925842	2.5517	15.7636	7.17693e-05	0.00461947	ENSMUSG00000048489	-1.29605	5.66428	24.4244	7.72829e-07	4.65975e-05	ENSMUSG00000026112	0.262676	7.6474	19.2241	1.16235e-05	0.000717006	ENSMUSG00000041375	0.522876	5.68921	23.2528	1.42046e-06	9.04908e-05	ENSMUSG00000024782	0.315177	7.99862	18.6319	1.58546e-05	0.00102136	ENSMUSG00000035640	-1.24869
ENSMUSG00000059248	0.319214	6.22791	22.1974	2.46013e-06	0.000165645	ENSMUSG00000072487	-1.53614	0.96343	23.3896	1.32292e-06	9.01941e-05							ENSMUSG00000036446	0.65659	4.21044	15.7588	7.19523e-05	0.00461947	ENSMUSG00000022018	-1.15208	5.21657	24.3874	7.87815e-07	4.72727e-05	ENSMUSG00000037017	0.380013	3.82977	19.2003	1.17693e-05	0.000719449	ENSMUSG00000040950	1.32691	1.96278	23.147	1.50074e-06	9.51452e-05	ENSMUSG00000033768	0.918289	4.32939	18.6094	1.60426e-05	0.0010285	ENSMUSG00000021190	0.45168
ENSMUSG00000003545	-1.10756	3.79769	22.1767	2.48673e-06	0.000166635	ENSMUSG00000023883	-0.21134	5.65671	23.3231	1.36945e-06	9.29196e-05							ENSMUSG00000031862	-0.309709	6.72081	15.7485	7.23435e-05	0.00462237	ENSMUSG00000002831	-0.593939	7.71669	24.3284	8.12325e-07	4.85102e-05	ENSMUSG00000042043	0.370902	4.73747	19.1993	1.17758e-05	0.000719449	ENSMUSG00000031478	0.70179	2.21624	23.1047	1.53414e-06	9.67974e-05	ENSMUSG00000027889	-0.296469	5.3834	18.4406	1.75285e-05	0.00111838	ENSMUSG00000002602	0.705985
ENSMUSG00000024766	-1.0825	2.34923	22.1601	2.50829e-06	0.000167279	ENSMUSG00000022475	-0.45121	5.67478	23.2583	1.41642e-06	9.56485e-05							ENSMUSG00000042155	0.64017	4.85425	15.6823	7.49204e-05	0.0047481	ENSMUSG00000062563	-1.33796	2.71061	24.3085	8.20782e-07	4.87142e-05	ENSMUSG00000047719	0.382751	5.08478	19.1679	1.1971e-05	0.000727895	ENSMUSG00000038717	0.505116	6.08282	23.07	1.5621e-06	9.80927e-05	ENSMUSG00000027199	0.535088	10.1718	18.3482	1.8399e-05	0.00116569	ENSMUSG00000030323	0.965963
ENSMUSG00000075706	0.190712	7.42363	22.1381	2.53726e-06	0.000168409	ENSMUSG00000050410	-0.535132	2.4638	23.2269	1.43971e-06	9.6761e-05							ENSMUSG00000056228	-0.460518	4.46757	15.6798	7.50224e-05	0.0047481	ENSMUSG00000022337	-0.348208	6.65695	24.302	8.23547e-07	4.87142e-05	ENSMUSG00000027472	0.381805	6.6109	19.1319	1.21989e-05	0.000738235	ENSMUSG00000034035	0.772167	2.19889	22.959	1.65489e-06	0.000103427	ENSMUSG00000050732	-0.38707	6.96884	18.3411	1.84676e-05	0.00116569	ENSMUSG00000034462	0.991288
ENSMUSG00000021803	1.31961	4.76179	22.1154	2.5674e-06	0.000169606	ENSMUSG00000023755	-0.541956	3.01572	23.1863	1.47038e-06	9.83562e-05							ENSMUSG00000022098	-1.15254	6.04817	15.6555	7.59922e-05	0.00478679	ENSMUSG00000021294	0.580964	4.94957	24.2662	8.39001e-07	4.93942e-05	ENSMUSG00000024691	-0.548692	3.2199	19.1037	1.23802e-05	0.000745671	ENSMUSG00000055692	0.811387	1.99352	22.8519	1.74973e-06	0.000108838	ENSMUSG00000051439	-0.732711	3.14341	18.3345	1.85322e-05	0.00116569	ENSMUSG00000027598	-0.602052
ENSMUSG00000044345	0.402643	3.53279	22.0995	2.5888e-06	0.000170217	ENSMUSG00000030309	-0.513227	4.09726	23.1114	1.52882e-06	0.000101785							ENSMUSG00000079491	1.08546	3.15634	15.6089	7.7886e-05	0.00486134	ENSMUSG00000041515	0.822884	2.82156	24.2149	8.6165e-07	5.04895e-05	ENSMUSG00000020439	-0.342229	7.9879	19.0856	1.24984e-05	0.000746327	ENSMUSG00000044628	0.584505	3.29077	22.7786	1.81777e-06	0.00011254	ENSMUSG00000039834	-0.286395	4.58102	18.2624	1.92464e-05	0.00119227	ENSMUSG00000049044	-0.886683
ENSMUSG00000070858	0.340566	4.24652	22.043	2.66615e-06	0.000174483	ENSMUSG00000005373	-0.62276	2.13977	23.0281	1.59654e-06	0.000105494							ENSMUSG00000044715	0.612209	5.59854	15.6085	7.79037e-05	0.00486134	ENSMUSG00000030878	-0.491496	3.79824	24.1677	8.83014e-07	5.14995e-05	ENSMUSG00000035443	0.412122	4.28824	19.0841	1.25079e-05	0.000746327	ENSMUSG00000037364	0.328968	6.62962	22.7241	1.87009e-06	0.000115238	ENSMUSG00000028514	0.433759	8.11936	18.2524	1.93482e-05	0.00119227	ENSMUSG00000023272	-0.744555
ENSMUSG00000060371	-0.26367	8.37077	21.9728	2.76543e-06	0.000180139	ENSMUSG00000034462	-0.248671	6.01239	23.0194	1.60376e-06	0.000105494							ENSMUSG00000020289	-0.420222	3.89546	15.5792	7.91208e-05	0.00489832	ENSMUSG00000056501	-1.41429	5.66084	24.1142	9.07903e-07	5.27048e-05	ENSMUSG00000024695	0.323364	6.62983	19.0652	1.26326e-05	0.000750262	ENSMUSG00000024677	1.11693	0.865251	22.6822	1.91131e-06	0.00011723	ENSMUSG00000037060	-1.05591	3.31655	18.2428	1.94457e-05	0.00119227	ENSMUSG00000012519	0.841687
ENSMUSG00000043067	0.217336	6.93605	21.9611	2.78239e-06	0.000180405	ENSMUSG00000022321	0.269129	5.387	23.0157	1.60684e-06	0.000105494							ENSMUSG00000062901	0.499377	5.63781	15.5713	7.94503e-05	0.00489832	ENSMUSG00000028042	0.538101	4.90468	24.0794	9.24455e-07	5.32268e-05	ENSMUSG00000068335	-0.752536	2.18774	18.9301	1.35594e-05	0.000801575	ENSMUSG00000074575	-1.42464	2.31418	22.5904	2.00486e-06	0.000122399	ENSMUSG00000017778	0.273314	7.53487	18.2374	1.95014e-05	0.00119227	ENSMUSG00000006599	-0.486685
ENSMUSG00000068699	-0.885997	2.83003	21.9357	2.81944e-06	0.000181964	ENSMUSG00000025138	-0.293726	5.38537	23.001	1.61917e-06	0.000105813							ENSMUSG00000037773	-0.550965	3.43984	15.5609	7.98884e-05	0.00489832	ENSMUSG00000021413	-0.381401	6.08979	24.0747	9.26679e-07	5.32268e-05	ENSMUSG00000031672	0.354557	9.50532	18.8764	1.39468e-05	0.000820673	ENSMUSG00000026042	1.60158	4.61803	22.5257	2.0735e-06	0.000125582	ENSMUSG00000036523	1.24019	2.63164	18.2282	1.95959e-05	0.00119227	ENSMUSG00000074794	1.69441
ENSMUSG00000019726	-0.375404	6.20496	21.9118	2.85474e-06	0.000183397	ENSMUSG00000021364	-0.366518	4.60493	22.9013	1.70538e-06	0.000110868							ENSMUSG00000024862	-0.367564	4.74586	15.5592	7.99636e-05	0.00489832	ENSMUSG00000026781	-0.492239	5.2729	24.062	9.32814e-07	5.32268e-05	ENSMUSG00000015134	-0.938803	1.29884	18.8577	1.40844e-05	0.000824972	ENSMUSG00000060586	1.33539	5.36324	22.5233	2.07605e-06	0.000125582	ENSMUSG00000071644	0.274806	7.42393	18.226	1.96179e-05	0.00119227	ENSMUSG00000044167	-0.841019
ENSMUSG00000024300	0.718627	1.69119	21.86	2.93279e-06	0.000187551	ENSMUSG00000038984	0.275909	5.69177	22.8937	1.71216e-06	0.000110868							ENSMUSG00000049562	-0.541661	4.74906	15.4619	8.41851e-05	0.00513337	ENSMUSG00000049807	0.372534	5.05341	24.0597	9.33953e-07	5.32268e-05	ENSMUSG00000003198	0.85942	1.81058	18.8308	1.42838e-05	0.000832831	ENSMUSG00000022681	0.42996	4.35314	22.507	2.09378e-06	0.000125684	ENSMUSG00000012405	0.230989	6.86909	18.2228	1.96511e-05	0.00119227	ENSMUSG00000019873	-0.447802
ENSMUSG00000026819	-0.249702	6.3091	21.8465	2.9535e-06	0.000188017	ENSMUSG00000039671	-0.207715	7.24843	22.8247	1.77467e-06	0.000114394							ENSMUSG00000024299	-0.609975	4.27265	15.4304	8.56018e-05	0.00519603	ENSMUSG00000037145	-2.55396	2.10749	23.9967	9.65001e-07	5.46006e-05	ENSMUSG00000058569	-0.270246	6.37168	18.8165	1.4392e-05	0.000835327	ENSMUSG00000001053	0.47897	4.17385	22.5042	2.0968e-06	0.000125684	ENSMUSG00000039058	-0.791185	2.67279	18.221	1.967e-05	0.00119227	ENSMUSG00000042015	0.460986
ENSMUSG00000025981	-0.496243	4.32985	21.834	2.97286e-06	0.000188393	ENSMUSG00000039385	0.351847	5.10026	22.7803	1.81621e-06	0.000116541							ENSMUSG00000037905	-0.869456	6.93976	15.4005	8.69673e-05	0.00525503	ENSMUSG00000012640	-0.411879	5.01867	23.9931	9.66809e-07	5.46006e-05	ENSMUSG00000021823	-0.300433	6.9216	18.7354	1.50169e-05	0.000867652	ENSMUSG00000036959	-0.401969	4.37986	22.43	2.17942e-06	0.000130045	ENSMUSG00000028798	0.255759	6.40472	18.1973	1.99159e-05	0.00120171	ENSMUSG00000078651	-1.16948
ENSMUSG00000068859	0.67673	3.95412	21.7828	3.05319e-06	0.000192612	ENSMUSG00000038530	0.312478	8.16586	22.7354	1.8591e-06	0.000118756							ENSMUSG00000067235	-1.05113	5.17982	15.3895	8.74742e-05	0.00526185	ENSMUSG00000064181	-0.39126	6.21882	23.9359	9.95993e-07	5.59955e-05	ENSMUSG00000043587	0.536303	3.75499	18.6977	1.53171e-05	0.000881009	ENSMUSG00000034875	-1.45787	9.2109	22.4002	2.21352e-06	0.000131215	ENSMUSG00000027428	0.251958	5.71302	18.1396	2.05291e-05	0.00123313	ENSMUSG00000051177	-0.56041
ENSMUSG00000028885	-0.986006	1.82866	21.7689	3.07543e-06	0.000193145	ENSMUSG00000078234	0.369316	4.60128	22.6509	1.94264e-06	0.000123536							ENSMUSG00000037364	-0.325915	6.76846	15.3274	9.03941e-05	0.00541311	ENSMUSG00000032279	-0.306866	9.55451	23.8411	1.04623e-06	5.85558e-05	ENSMUSG00000047786	0.964852	2.26869	18.6371	1.58112e-05	0.000905349	ENSMUSG00000099032	1.26475	3.43437	22.3934	2.22138e-06	0.000131215	ENSMUSG00000043088	0.917152	3.38178	18.1058	2.0896e-05	0.00124954	ENSMUSG00000034936	-1.39346
ENSMUSG00000031534	0.359416	4.66782	21.7291	3.1399e-06	0.000195914	ENSMUSG00000046756	-0.48973	5.34571	22.4452	2.1622e-06	0.000136885							ENSMUSG00000043424	0.450111	3.20778	15.2954	9.19392e-05	0.00548106	ENSMUSG00000054855	1.07007	1.08747	23.7867	1.07626e-06	5.99679e-05	ENSMUSG00000042286	-0.531106	6.7912	18.6264	1.59003e-05	0.00090639	ENSMUSG00000023087	-1.38442	3.65207	22.3869	2.22888e-06	0.000131215	ENSMUSG00000047867	0.452032	4.79147	18.0659	2.13385e-05	0.00126483	ENSMUSG00000046229	0.528789
ENSMUSG00000026028	-0.253312	7.73042	21.7245	3.1475e-06	0.000195914	ENSMUSG00000078878	3.2889	0.974841	22.4164	2.19489e-06	0.000138023							ENSMUSG00000031309	0.489586	6.28395	15.2767	9.2854e-05	0.00551099	ENSMUSG00000062647	0.383676	8.05128	23.7574	1.09276e-06	6.03724e-05	ENSMUSG00000028212	0.926119	1.40909	18.5221	1.67944e-05	0.000951842	ENSMUSG00000006958	0.575874	3.35616	22.3704	2.24809e-06	0.000131758	ENSMUSG00000029074	-0.49286	4.2532	18.0657	2.13413e-05	0.00126483	ENSMUSG00000029178	-0.955841
ENSMUSG00000039745	0.567672	3.41782	21.6502	3.27182e-06	0.000202059	ENSMUSG00000020680	-0.29826	5.93935	22.4123	2.19964e-06	0.000138023							ENSMUSG00000006445	-0.464035	6.39663	15.2504	9.4156e-05	0.00556353	ENSMUSG00000023087	-1.1988	4.75431	23.7566	1.09319e-06	6.03724e-05	ENSMUSG00000042644	-0.390901	4.2516	18.5162	1.68468e-05	0.000951842	ENSMUSG00000037411	-1.79457	1.92213	22.2698	2.36908e-06	0.000138235	ENSMUSG00000031767	0.515529	3.7835	18.019	2.18706e-05	0.00129046	ENSMUSG00000118663	-0.471448
ENSMUSG00000020220	-0.275762	7.12027	21.6402	3.28883e-06	0.000202059	ENSMUSG00000034152	0.230325	6.70229	22.3712	2.24715e-06	0.000140382							ENSMUSG00000045039	-0.384392	5.84175	15.1914	9.71424e-05	0.00569229	ENSMUSG00000022884	-0.342289	8.46582	23.7043	1.12329e-06	6.17611e-05	ENSMUSG00000030519	-1.181	0.659984	18.5056	1.69403e-05	0.000952911	ENSMUSG00000004383	0.540459	4.15938	22.0936	2.59669e-06	0.000150848	ENSMUSG00000047963	1.37837	2.15571	17.9302	2.29161e-05	0.00134246	ENSMUSG00000030704	-0.458418
ENSMUSG00000042793	1.17998	3.22433	21.6398	3.2895e-06	0.000202059	ENSMUSG00000067787	-0.180746	6.7712	22.3239	2.30326e-06	0.000143257							ENSMUSG00000038172	-0.486546	5.76729	15.1906	9.71875e-05	0.00569229	ENSMUSG00000019970	-0.878651	5.47935	23.6625	1.14799e-06	6.26584e-05	ENSMUSG00000024210	0.984546	3.32597	18.4616	1.73364e-05	0.000970914	ENSMUSG00000045509	0.887893	1.23723	22.0707	2.62792e-06	0.000151993	ENSMUSG00000044986	0.6641	6.80695	17.9211	2.30255e-05	0.00134246	ENSMUSG00000000278	0.557962
ENSMUSG00000036430	0.308106	4.49607	21.5948	3.36766e-06	0.000205956	ENSMUSG00000027108	0.218323	6.22543	22.3015	2.33025e-06	0.000144303							ENSMUSG00000110206	-0.696503	3.23495	15.0972	0.000102116	0.00594092	ENSMUSG00000050721	0.663006	4.54932	23.6597	1.14965e-06	6.26584e-05	ENSMUSG00000064345	0.61356	13.4748	18.4019	1.78879e-05	0.000994637	ENSMUSG00000037029	-0.397127	4.70926	22.0211	2.69673e-06	0.000154664	ENSMUSG00000037706	0.27211	8.29553	17.9163	2.30833e-05	0.00134246	ENSMUSG00000034343	-0.499812
ENSMUSG00000021094	-0.288686	4.69156	21.569	3.41321e-06	0.000207835	ENSMUSG00000023336	-0.513991	2.50537	22.2735	2.36442e-06	0.000145498							ENSMUSG00000029840	0.34549	7.02741	15.0934	0.000102322	0.00594092	ENSMUSG00000016940	0.370998	5.01251	23.5622	1.20941e-06	6.56287e-05	ENSMUSG00000027562	0.699463	2.83921	18.3954	1.79488e-05	0.000994637	ENSMUSG00000030203	-0.52088	5.40059	22.0205	2.69756e-06	0.000154664	ENSMUSG00000008683	0.297459	6.44256	17.9105	2.31546e-05	0.00134246	ENSMUSG00000031304	1.34768
ENSMUSG00000038943	1.09411	2.16552	21.5134	3.51372e-06	0.000212895	ENSMUSG00000025409	-0.365509	6.44904	22.269	2.37007e-06	0.000145498							ENSMUSG00000028362	1.12308	0.572317	15.0578	0.000104268	0.00602768	ENSMUSG00000021578	-0.313577	5.37767	23.5374	1.22508e-06	6.61912e-05	ENSMUSG00000030760	0.420012	3.87781	18.3907	1.79937e-05	0.000994637	ENSMUSG00000020308	0.396691	4.78878	21.7933	3.03651e-06	0.000173344	ENSMUSG00000025082	1.46924	4.50111	17.8617	2.3755e-05	0.00136916	ENSMUSG00000055128	-0.320268
ENSMUSG00000048920	0.283284	5.98164	21.5063	3.52672e-06	0.000212895	ENSMUSG00000010461	0.737939	1.89354	22.2223	2.42842e-06	0.000147971							ENSMUSG00000021376	-0.779521	4.19201	15.0195	0.000106407	0.00612483	ENSMUSG00000027238	-0.703345	7.15063	23.4918	1.25448e-06	6.74877e-05	ENSMUSG00000057286	0.687098	3.69268	18.3398	1.84808e-05	0.00101716	ENSMUSG00000025792	0.389541	8.94559	21.7464	3.11167e-06	0.000176869	ENSMUSG00000024580	0.390051	6.09049	17.8565	2.38204e-05	0.00136916	ENSMUSG00000038550	-3.86644
ENSMUSG00000032925	-0.388536	3.65426	21.4966	3.54455e-06	0.000213054	ENSMUSG00000000563	0.165679	7.70243	22.22	2.43123e-06	0.000147971							ENSMUSG00000026279	-0.41087	5.3902	14.957	0.000109991	0.00630394	ENSMUSG00000018995	-0.413	3.93373	23.4258	1.29823e-06	6.95416e-05	ENSMUSG00000074457	-0.374429	5.1754	18.2076	1.98089e-05	0.00108558	ENSMUSG00000103088	1.06214	1.04502	21.7088	3.17337e-06	0.000179602	ENSMUSG00000006574	-0.687371	5.46561	17.8399	2.4029e-05	0.0013713	ENSMUSG00000040010	-0.798769
ENSMUSG00000034731	-0.457144	6.68341	21.4358	3.65869e-06	0.000218974	ENSMUSG00000021819	-0.181134	7.64659	22.2055	2.44972e-06	0.000148459							ENSMUSG00000020697	-0.403129	4.68763	14.9332	0.000111385	0.00635658	ENSMUSG00000091345	2.74252	1.39125	23.4161	1.30482e-06	6.95962e-05	ENSMUSG00000027165	0.37468	5.45532	18.1816	2.00807e-05	0.00109577	ENSMUSG00000022559	0.389825	4.77624	21.6722	3.23453e-06	0.000182281	ENSMUSG00000020131	-0.572755	2.60203	17.8372	2.40633e-05	0.0013713	ENSMUSG00000014077	-0.435523
ENSMUSG00000024268	0.280248	8.71231	21.4219	3.68532e-06	0.00021963	ENSMUSG00000026827	0.18756	6.87543	22.1455	2.52752e-06	0.000152394							ENSMUSG00000090877	2.0638	2.95458	14.9113	0.000112684	0.00639996	ENSMUSG00000020385	-0.499244	5.81598	23.4015	1.31475e-06	6.98272e-05	ENSMUSG00000038244	-0.333881	6.72063	18.1606	2.03041e-05	0.00110325	ENSMUSG00000036781	-0.334238	6.48099	21.6376	3.29339e-06	0.000184808	ENSMUSG00000028173	0.322355	7.48655	17.818	2.43077e-05	0.00137933	ENSMUSG00000030409	0.740497
ENSMUSG00000035048	0.346345	4.38633	21.3973	3.73288e-06	0.000221521	ENSMUSG00000025531	0.276164	5.58247	22.1389	2.53614e-06	0.000152394							ENSMUSG00000038563	-0.489552	5.76586	14.9043	0.000113104	0.00639996	ENSMUSG00000063605	0.532193	3.119	23.3625	1.34169e-06	7.09561e-05	ENSMUSG00000075415	-0.263406	6.81418	18.108	2.08723e-05	0.00112931	ENSMUSG00000033220	0.883392	1.99493	21.6063	3.34752e-06	0.00018705	ENSMUSG00000025544	0.284188	7.84818	17.8018	2.45152e-05	0.00138521	ENSMUSG00000024097	-0.33369
ENSMUSG00000032501	-0.711617	4.20812	21.3812	3.76453e-06	0.000221677	ENSMUSG00000028197	-0.854583	3.39835	22.1158	2.56687e-06	0.000153065							ENSMUSG00000043629	1.27436	2.79905	14.8897	0.000113984	0.00640202	ENSMUSG00000060802	0.805405	7.21885	23.3047	1.3826e-06	7.28109e-05	ENSMUSG00000046546	-0.462456	5.69375	18.0976	2.09865e-05	0.0011307	ENSMUSG00000029710	0.305176	6.43379	21.5799	3.39391e-06	0.000188842	ENSMUSG00000029797	-1.43203	2.04001	17.7461	2.52435e-05	0.00142035	ENSMUSG00000025743	0.634202
ENSMUSG00000038418	-1.23905	7.68457	21.3798	3.76717e-06	0.000221677	ENSMUSG00000027255	-0.201803	5.40903	22.1143	2.5689e-06	0.000153065							ENSMUSG00000066621	-0.417082	5.3899	14.8878	0.000114099	0.00640202	ENSMUSG00000026826	-1.24678	1.73945	23.2866	1.39569e-06	7.31917e-05	ENSMUSG00000022843	0.805877	2.43491	18.0723	2.12678e-05	0.00114104	ENSMUSG00000025533	-0.493213	8.50279	21.5409	3.4636e-06	0.000191659	ENSMUSG00000060224	-0.318347	7.44173	17.6852	2.60643e-05	0.00145673	ENSMUSG00000062761	0.457273
ENSMUSG00000056962	-0.315705	4.73244	21.3103	3.90626e-06	0.000228278	ENSMUSG00000024301	-0.552083	2.38813	22.047	2.66058e-06	0.000157865							ENSMUSG00000038005	0.66927	3.69273	14.8471	0.00011659	0.0064985	ENSMUSG00000031708	0.438483	8.40472	23.2526	1.42061e-06	7.41867e-05	ENSMUSG00000025504	-0.701305	1.7121	18.0252	2.18002e-05	0.00116216	ENSMUSG00000041079	-0.540453	4.85383	21.5354	3.47361e-06	0.000191659	ENSMUSG00000062480	-1.16185	3.59553	17.682	2.61087e-05	0.00145673	ENSMUSG00000038539	0.836305
ENSMUSG00000029817	-0.297573	6.2315	21.3075	3.91194e-06	0.000228278	ENSMUSG00000016024	0.852612	2.59984	22.0064	2.71739e-06	0.000160449							ENSMUSG00000021611	-1.01211	3.21913	14.8438	0.000116792	0.0064985	ENSMUSG00000042807	-0.755496	4.13684	23.2314	1.43636e-06	7.46966e-05	ENSMUSG00000036214	0.49176	3.06664	18.0214	2.18433e-05	0.00116216	ENSMUSG00000024737	0.934306	1.93243	21.4657	3.60219e-06	0.000197925	ENSMUSG00000008892	0.200016	6.33003	17.6555	2.64747e-05	0.001471	ENSMUSG00000020108	-1.10734
ENSMUSG00000024114	1.69836	1.43012	21.2948	3.93801e-06	0.000228846	ENSMUSG00000040220	-0.264422	4.95715	21.9998	2.72676e-06	0.000160449							ENSMUSG00000005615	0.520562	7.69831	14.8286	0.000117734	0.00652372	ENSMUSG00000000290	1.02087	3.74734	23.184	1.47219e-06	7.62421e-05	ENSMUSG00000031486	-0.424283	4.67133	18.0004	2.20858e-05	0.00117018	ENSMUSG00000036372	0.349903	4.75048	21.441	3.64893e-06	0.000199661	ENSMUSG00000010362	0.311347	4.01136	17.5983	2.72826e-05	0.0015096	ENSMUSG00000026921	0.480266
ENSMUSG00000052837	-1.12898	5.77261	21.2187	4.09745e-06	0.000237127	ENSMUSG00000054619	-0.444059	4.79713	21.9798	2.75541e-06	0.000161465							ENSMUSG00000026972	-0.489608	5.74481	14.8136	0.000118678	0.00654889	ENSMUSG00000029135	-0.720872	5.64878	23.1746	1.47936e-06	7.6297e-05	ENSMUSG00000015950	-0.986283	3.03215	17.9784	2.23431e-05	0.00117892	ENSMUSG00000020546	-0.479706	5.06353	21.3694	3.78772e-06	0.000205228	ENSMUSG00000031021	0.246964	5.91668	17.5572	2.788e-05	0.00153628	ENSMUSG00000028600	-1.09873
ENSMUSG00000001120	0.407698	6.0931	21.0818	4.40083e-06	0.000253636	ENSMUSG00000005774	-0.384438	4.62706	21.9217	2.84001e-06	0.000165737							ENSMUSG00000064225	-1.57056	1.8199	14.7877	0.00012032	0.00659981	ENSMUSG00000046818	0.844678	1.85056	23.1553	1.49431e-06	7.66811e-05	ENSMUSG00000031198	0.233505	7.0426	17.9293	2.29268e-05	0.00120474	ENSMUSG00000032536	-0.514037	7.694	21.3686	3.78932e-06	0.000205228	ENSMUSG00000028809	-0.232495	6.97348	17.5169	2.84773e-05	0.001561	ENSMUSG00000023947	1.03431
ENSMUSG00000027598	-0.207034	6.13044	21.0271	4.52829e-06	0.000259558	ENSMUSG00000118662	0.328025	4.8873	21.7196	3.15552e-06	0.000183395							ENSMUSG00000090175	-2.84434	3.1113	14.777	0.000120999	0.00659981	ENSMUSG00000001552	0.3182	8.38749	23.1492	1.49909e-06	7.66811e-05	ENSMUSG00000020513	0.701964	2.5714	17.8769	2.35668e-05	0.00122694	ENSMUSG00000028124	-0.424149	8.52421	21.3639	3.7985e-06	0.000205228	ENSMUSG00000050192	-0.625958	2.97018	17.5112	2.85627e-05	0.001561	ENSMUSG00000020051	-0.632803
ENSMUSG00000043648	0.962661	0.854187	21.0219	4.54064e-06	0.000259558	ENSMUSG00000032437	0.152992	6.6908	21.7081	3.1744e-06	0.00018374							ENSMUSG00000074489	-1.59216	1.92592	14.7736	0.000121221	0.00659981	ENSMUSG00000020361	-0.306857	7.55535	23.1366	1.5089e-06	7.68675e-05	ENSMUSG00000047798	-1.27172	0.281814	17.8762	2.35753e-05	0.00122694	ENSMUSG00000034863	0.549866	4.30306	21.3567	3.81292e-06	0.000205228	ENSMUSG00000028101	-0.328948	4.68548	17.4942	2.88188e-05	0.00156857	ENSMUSG00000029817	-0.498415
ENSMUSG00000017291	-0.413199	7.6973	21.0096	4.56988e-06	0.000260167	ENSMUSG00000036295	0.281101	5.76158	21.6631	3.24976e-06	0.000186873							ENSMUSG00000039218	-0.511619	9.08402	14.7681	0.000121578	0.00659981	ENSMUSG00000039384	0.690803	3.681	23.0876	1.54786e-06	7.85318e-05	ENSMUSG00000022604	0.470836	3.27677	17.8712	2.36376e-05	0.00122694	ENSMUSG00000024782	-0.278571	8.09399	21.3301	3.8661e-06	0.000207245	ENSMUSG00000039252	1.52851	0.874666	17.4727	2.9146e-05	0.00157992	ENSMUSG00000020143	1.03941
ENSMUSG00000026565	-0.413357	4.86386	20.9313	4.76042e-06	0.000269918	ENSMUSG00000052684	0.273576	6.33156	21.6549	3.26373e-06	0.000186873							ENSMUSG00000002103	-0.312562	5.78625	14.7504	0.000122719	0.00663308	ENSMUSG00000021147	-0.313203	5.42831	23.0503	1.57816e-06	7.97449e-05	ENSMUSG00000020413	0.361589	4.26833	17.8179	2.43082e-05	0.00125665	ENSMUSG00000046201	-0.346606	5.75931	21.2927	3.94224e-06	0.000210471	ENSMUSG00000021417	0.525359	6.28907	17.4188	2.99845e-05	0.00161293	ENSMUSG00000030691	-0.728389
ENSMUSG00000007415	0.206182	6.15165	20.8998	4.83933e-06	0.000273286	ENSMUSG00000004035	-1.14934	5.25865	21.6524	3.26807e-06	0.000186873							ENSMUSG00000009073	-0.476754	7.00459	14.7433	0.000123184	0.00663308	ENSMUSG00000041959	-0.471448	4.57374	22.9817	1.63555e-06	8.17127e-05	ENSMUSG00000030301	0.350067	4.32604	17.7602	2.50565e-05	0.00128852	ENSMUSG00000027257	0.356418	5.03146	21.2415	4.04903e-06	0.000215301	ENSMUSG00000020766	0.246319	6.05204	17.418	2.99968e-05	0.00161293	ENSMUSG00000030264	-0.427762
ENSMUSG00000061981	0.19867	6.85929	20.8654	4.92725e-06	0.000277126	ENSMUSG00000055926	-0.648956	2.38903	21.6305	3.30562e-06	0.000188261							ENSMUSG00000032839	1.07129	2.59101	14.6941	0.000126442	0.00678115	ENSMUSG00000027206	-0.338872	6.23351	22.9809	1.63618e-06	8.17127e-05	ENSMUSG00000039496	0.45982	5.07	17.7549	2.51266e-05	0.00128852	ENSMUSG00000026623	-0.479703	7.64939	21.2067	4.12323e-06	0.000218366	ENSMUSG00000035011	-0.289595	6.64741	17.3793	3.06134e-05	0.00163948	ENSMUSG00000030798	1.00678
ENSMUSG00000026672	-0.39218	4.91035	20.8577	4.94692e-06	0.000277126	ENSMUSG00000025766	0.644753	3.53982	21.6034	3.35264e-06	0.000190175							ENSMUSG00000038591	0.862962	3.60151	14.6592	0.000128805	0.00684714	ENSMUSG00000036104	-0.296578	6.12027	22.9803	1.63674e-06	8.17127e-05	ENSMUSG00000021905	0.275235	4.77306	17.7418	2.53006e-05	0.00129225	ENSMUSG00000006205	0.588386	7.3183	21.0819	4.4007e-06	0.000232128	ENSMUSG00000022468	1.24521	2.63386	17.3136	3.16905e-05	0.00169037	ENSMUSG00000022800	-0.385366
ENSMUSG00000026773	-0.357961	5.40678	20.8239	5.03511e-06	0.000279893	ENSMUSG00000013973	-0.405672	3.1929	21.5597	3.42976e-06	0.000193774							ENSMUSG00000056144	-1.29072	2.65609	14.657	0.000128958	0.00684714	ENSMUSG00000031431	-0.861967	6.9077	22.9328	1.67764e-06	8.34207e-05	ENSMUSG00000021375	0.268327	7.9885	17.734	2.54045e-05	0.00129239	ENSMUSG00000027710	-0.487178	6.85737	21.041	4.49548e-06	0.000236183	ENSMUSG00000031458	0.561339	4.04709	17.208	3.35026e-05	0.00177467	ENSMUSG00000023224	0.503728
ENSMUSG00000035711	-0.567428	3.25351	20.8234	5.03627e-06	0.000279893	ENSMUSG00000040856	0.265209	5.60654	21.4616	3.60979e-06	0.000202345							ENSMUSG00000070332	-1.32474	2.43834	14.6471	0.000129634	0.00684714	ENSMUSG00000039048	-0.352644	6.34133	22.8454	1.75567e-06	8.69545e-05	ENSMUSG00000033857	-0.453333	3.14731	17.6515	2.65308e-05	0.00134425	ENSMUSG00000046402	-2.3792	5.40619	20.9651	4.67728e-06	0.000244759	ENSMUSG00000029634	-0.35657	6.53113	17.206	3.3537e-05	0.00177467	ENSMUSG00000018900	-0.541631
ENSMUSG00000027177	-0.269722	7.04241	20.7746	5.16641e-06	0.0002855	ENSMUSG00000036887	0.463879	4.77524	21.4602	3.61253e-06	0.000202345							ENSMUSG00000021187	0.845634	3.72591	14.6458	0.000129723	0.00684714	ENSMUSG00000036672	-0.938523	2.35456	22.8209	1.77822e-06	8.77232e-05	ENSMUSG00000045636	0.408369	8.35975	17.6436	2.66407e-05	0.00134425	ENSMUSG00000046230	-0.493627	5.90679	20.9322	4.75837e-06	0.000248019	ENSMUSG00000040274	-0.429393	5.39223	17.1819	3.39657e-05	0.00178587	ENSMUSG00000036867	0.67343
ENSMUSG00000038642	0.469822	5.24976	20.7703	5.17793e-06	0.0002855	ENSMUSG00000047793	-0.450626	4.77498	21.454	3.62427e-06	0.000202345							ENSMUSG00000047284	-0.348275	5.8663	14.5638	0.00013549	0.00712338	ENSMUSG00000013736	-0.359479	4.97168	22.7624	1.83317e-06	9.00779e-05	ENSMUSG00000053929	-0.269158	5.38255	17.6366	2.67397e-05	0.00134425	ENSMUSG00000020893	-1.58492	6.00239	20.9122	4.80812e-06	0.000249625	ENSMUSG00000074254	-1.61115	8.68592	17.1791	3.40166e-05	0.00178587	ENSMUSG00000037336	1.51086
ENSMUSG00000035173	-0.264442	6.00315	20.7553	5.21874e-06	0.000285675	ENSMUSG00000055436	-0.280152	7.28038	21.4152	3.69818e-06	0.000205662							ENSMUSG00000039110	-1.20591	3.04161	14.528	0.000138095	0.00722181	ENSMUSG00000020268	-0.405043	5.00826	22.6494	1.9442e-06	9.51591e-05	ENSMUSG00000072694	-0.588253	2.11754	17.6053	2.71829e-05	0.00136117	ENSMUSG00000062761	0.413949	4.47868	20.8907	4.86251e-06	0.000250786	ENSMUSG00000029344	-0.936158	5.32989	17.1632	3.4301e-05	0.00179374	ENSMUSG00000073542	-0.602001
ENSMUSG00000025858	0.232131	5.40742	20.7541	5.22191e-06	0.000285675	ENSMUSG00000030795	-0.208949	8.36541	21.3983	3.73097e-06	0.000206676							ENSMUSG00000061740	-1.48361	6.53442	14.5131	0.000139189	0.00722181	ENSMUSG00000004655	-0.750808	8.39582	22.6359	1.95788e-06	9.54544e-05	ENSMUSG00000031904	-0.338901	4.02873	17.5953	2.73264e-05	0.00136301	ENSMUSG00000046997	0.489978	5.10612	20.8883	4.86852e-06	0.000250786	ENSMUSG00000022013	0.255341	5.25622	17.1414	3.46976e-05	0.00180452	ENSMUSG00000028261	-0.565338
ENSMUSG00000020482	-0.453863	4.43245	20.6649	5.47095e-06	0.000298135	ENSMUSG00000037818	-0.399892	4.12357	21.3254	3.87553e-06	0.000213848							ENSMUSG00000032902	-0.534492	6.3162	14.4984	0.000140277	0.00722181	ENSMUSG00000042354	-0.456636	4.38991	22.5629	2.03374e-06	9.87668e-05	ENSMUSG00000023074	0.328545	5.01928	17.539	2.81473e-05	0.0013985	ENSMUSG00000001416	-0.265173	6.94836	20.8657	4.92641e-06	0.000252781	ENSMUSG00000025280	-0.323746	5.00568	17.1363	3.47903e-05	0.00180452	ENSMUSG00000025982	-0.493019
ENSMUSG00000042099	0.442069	4.43873	20.6507	5.51159e-06	0.000299185	ENSMUSG00000023051	-0.401733	4.69864	21.3107	3.9055e-06	0.000214666							ENSMUSG00000021819	-0.339968	6.4236	14.4976	0.000140339	0.00722181	ENSMUSG00000073409	1.86735	0.94889	22.4288	2.18084e-06	0.0001055	ENSMUSG00000029538	-0.288175	4.42336	17.4998	2.87339e-05	0.00142211	ENSMUSG00000048546	-0.884693	6.57281	20.8564	4.95047e-06	0.00025303	ENSMUSG00000066842	-1.03373	2.53304	17.1296	3.49132e-05	0.00180452	ENSMUSG00000014905	-0.875111
ENSMUSG00000020893	-0.788645	7.09689	20.6271	5.57992e-06	0.000301725	ENSMUSG00000059208	-0.257143	7.2219	21.2964	3.93462e-06	0.000215432							ENSMUSG00000041477	-0.558538	3.41616	14.4943	0.000140583	0.00722181	ENSMUSG00000028862	-1.44101	3.61672	22.4173	2.19391e-06	0.000105723	ENSMUSG00000001018	0.293607	5.89972	17.4838	2.89766e-05	0.00142858	ENSMUSG00000074151	0.97347	2.11526	20.829	5.02168e-06	0.000255545	ENSMUSG00000042988	0.461449	4.60365	17.1006	3.54514e-05	0.00182527	ENSMUSG00000021262	1.11608
ENSMUSG00000029765	-0.273546	7.25227	20.5711	5.74569e-06	0.000309494	ENSMUSG00000032279	0.158279	7.62551	21.2801	3.96825e-06	0.000216437							ENSMUSG00000003198	0.780646	2.02376	14.4903	0.000140885	0.00722181	ENSMUSG00000026739	-0.374815	6.19519	22.3926	2.22232e-06	0.00010668	ENSMUSG00000004565	-0.293737	4.46965	17.45	2.94961e-05	0.0014486	ENSMUSG00000026712	0.764946	1.98865	20.8226	5.03843e-06	0.000255545	ENSMUSG00000091537	0.26887	5.6988	17.0903	3.56442e-05	0.00182813	ENSMUSG00000023988	-0.390171
ENSMUSG00000025429	-0.601815	3.38428	20.5148	5.91729e-06	0.000316616	ENSMUSG00000006021	-0.269004	4.54127	21.268	3.99333e-06	0.000216971							ENSMUSG00000034105	-0.45714	3.47023	14.4843	0.000141332	0.00722181	ENSMUSG00000052794	0.747119	2.89254	22.3705	2.24798e-06	0.000107498	ENSMUSG00000048612	-0.598369	3.94951	17.3617	3.08984e-05	0.00151165	ENSMUSG00000031767	-0.447704	3.94044	20.8084	5.07597e-06	0.000256463	ENSMUSG00000017478	-0.234632	6.55658	17.0584	3.62468e-05	0.00185192	ENSMUSG00000070690	0.93751
ENSMUSG00000026131	-0.330267	9.16159	20.5129	5.92312e-06	0.000316616	ENSMUSG00000020994	-0.256232	6.8369	21.2294	4.07461e-06	0.000220542							ENSMUSG00000004565	-0.442055	7.10269	14.4796	0.000141689	0.00722181	ENSMUSG00000039197	-0.308048	7.42238	22.3246	2.30239e-06	0.000109152	ENSMUSG00000031387	-0.742474	2.12037	17.3399	3.12551e-05	0.00152327	ENSMUSG00000068735	0.610408	3.8804	20.7476	5.23969e-06	0.000263724	ENSMUSG00000036309	0.229553	7.95158	16.9716	3.79436e-05	0.00193121	ENSMUSG00000073155	0.529913
ENSMUSG00000026491	-0.31387	5.81752	20.4233	6.20711e-06	0.000330534	ENSMUSG00000018661	-0.239732	5.76282	21.1911	4.15688e-06	0.00022414							ENSMUSG00000090137	-0.608871	3.29907	14.4482	0.000144064	0.00730591	ENSMUSG00000008859	-0.298224	5.44376	22.3238	2.30331e-06	0.000109152	ENSMUSG00000056305	0.334028	4.32732	17.2738	3.2361e-05	0.00157117	ENSMUSG00000047656	0.657026	3.11131	20.7301	5.28779e-06	0.000265133	ENSMUSG00000024260	-0.236429	5.33804	16.9494	3.83885e-05	0.00194643	ENSMUSG00000058402	-0.630338
ENSMUSG00000041309	0.401631	4.41712	20.3851	6.33199e-06	0.000335907	ENSMUSG00000113902	0.32523	4.57184	21.1395	4.2703e-06	0.000228758							ENSMUSG00000031604	0.784464	6.52686	14.4434	0.000144433	0.00730591	ENSMUSG00000042202	-0.616894	4.51631	22.3193	2.3088e-06	0.000109152	ENSMUSG00000021930	0.335768	5.49703	17.2564	3.26591e-05	0.00157964	ENSMUSG00000031955	0.363562	6.89869	20.7222	5.3098e-06	0.000265229	ENSMUSG00000049401	0.280073	5.11903	16.8334	4.08091e-05	0.00206132	ENSMUSG00000006519	0.818564
ENSMUSG00000019789	0.581234	2.59309	20.2615	6.7546e-06	0.000356974	ENSMUSG00000006241	-0.395524	3.64389	21.1375	4.27479e-06	0.000228758							ENSMUSG00000032690	-2.21544	2.49853	14.3473	0.000151997	0.00765952	ENSMUSG00000046230	-0.486874	5.39529	22.3031	2.32827e-06	0.000109657	ENSMUSG00000054808	-0.230575	7.02849	17.2346	3.30365e-05	0.00159165	ENSMUSG00000054000	0.676644	2.87021	20.7136	5.33346e-06	0.000265405	ENSMUSG00000031382	1.83104	1.46196	16.7987	4.15622e-05	0.00209144	ENSMUSG00000035828	-1.41234
ENSMUSG00000034686	0.424044	5.19154	20.1825	7.03925e-06	0.000370619	ENSMUSG00000018372	-0.420315	4.04801	21.111	4.33439e-06	0.000231075							ENSMUSG00000037104	0.559185	3.31473	14.2665	0.000158664	0.00796539	ENSMUSG00000043153	-0.686411	2.37133	22.2381	2.40847e-06	0.000113008	ENSMUSG00000045817	-0.532707	5.75001	17.2277	3.31567e-05	0.00159165	ENSMUSG00000048865	0.759354	2.35389	20.7044	5.35923e-06	0.000265685	ENSMUSG00000022861	-0.987141	3.75762	16.7903	4.17464e-05	0.00209281	ENSMUSG00000032092	-0.871818
ENSMUSG00000022234	-0.216435	7.00577	20.0299	7.62419e-06	0.000399913	ENSMUSG00000032637	-0.28266	7.9091	21.0932	4.37479e-06	0.000232355							ENSMUSG00000051379	0.574773	4.54627	14.2231	0.000162368	0.00812082	ENSMUSG00000026308	0.443594	6.18061	22.1662	2.50037e-06	0.000116881	ENSMUSG00000036781	0.350542	5.09701	17.2123	3.34266e-05	0.00159362	ENSMUSG00000025059	-0.46331	9.50039	20.6508	5.51136e-06	0.000272203	ENSMUSG00000037110	-0.484301	6.0723	16.7523	4.25917e-05	0.00212719	ENSMUSG00000110439	2.79638
ENSMUSG00000033004	-0.307171	8.71007	20.0108	7.70061e-06	0.000402242	ENSMUSG00000034059	-0.274922	6.25488	21.0471	4.48141e-06	0.00023713							ENSMUSG00000080316	-0.789872	2.55287	14.1204	0.000171473	0.0085442	ENSMUSG00000036565	0.545484	5.06041	22.1031	2.5839e-06	0.000120334	ENSMUSG00000020078	0.26947	6.45498	17.2111	3.34474e-05	0.00159362	ENSMUSG00000037221	0.354954	5.1107	20.6047	5.64574e-06	0.000276968	ENSMUSG00000030000	1.1122	1.33049	16.7172	4.33856e-05	0.00215875	ENSMUSG00000060560	-3.61182
ENSMUSG00000048562	1.3799	2.91521	20.0045	7.72603e-06	0.000402242	ENSMUSG00000014837	-0.261253	4.51196	21.0224	4.53951e-06	0.000239311							ENSMUSG00000021969	0.465602	5.63262	14.0947	0.00017383	0.00862948	ENSMUSG00000030655	-0.41109	6.79065	22.0364	2.67535e-06	0.000123236	ENSMUSG00000031538	-0.535595	4.45244	17.1592	3.43733e-05	0.00163165	ENSMUSG00000069662	0.537495	5.44344	20.6033	5.64984e-06	0.000276968	ENSMUSG00000036446	0.857092	1.56609	16.6724	4.44221e-05	0.00220211	ENSMUSG00000109324	0.408286
ENSMUSG00000021868	0.382344	4.3615	19.9716	7.85991e-06	0.000407696	ENSMUSG00000058135	0.250109	7.06801	20.9918	4.61265e-06	0.000242267							ENSMUSG00000074829	0.620377	4.76819	14.0799	0.00017521	0.00866577	ENSMUSG00000051736	-0.885493	1.98413	22.0343	2.67823e-06	0.000123236	ENSMUSG00000021575	0.749297	2.47182	17.1324	3.48631e-05	0.00164571	ENSMUSG00000030647	0.59798	6.99209	20.5849	5.70429e-06	0.000277788	ENSMUSG00000040913	-0.379898	4.16593	16.6286	4.54602e-05	0.0022381	ENSMUSG00000024610	0.799484
ENSMUSG00000050954	-0.338312	4.08149	19.9588	7.91297e-06	0.000408934	ENSMUSG00000026427	-0.28701	5.02397	20.9491	4.71649e-06	0.000246337							ENSMUSG00000034317	0.698898	3.59139	14.0366	0.000179285	0.00882077	ENSMUSG00000022601	-0.460958	3.91068	22.0265	2.68917e-06	0.000123236	ENSMUSG00000020267	0.307492	7.0766	17.1289	3.49273e-05	0.00164571	ENSMUSG00000041263	0.448195	4.00437	20.5835	5.70869e-06	0.000277788	ENSMUSG00000074165	0.535655	3.38199	16.6268	4.55032e-05	0.0022381	ENSMUSG00000022139	-0.59455
ENSMUSG00000028973	0.21484	5.56171	19.9382	7.99877e-06	0.000411848	ENSMUSG00000034021	0.218455	7.03532	20.9432	4.73101e-06	0.000246337							ENSMUSG00000029918	-0.405562	3.57981	14.0238	0.000180509	0.00882077	ENSMUSG00000033436	0.523349	3.55001	22.0242	2.69241e-06	0.000123236	ENSMUSG00000020430	0.311822	4.99137	17.0912	3.56277e-05	0.00167254	ENSMUSG00000024610	0.743841	7.01741	20.5328	5.86167e-06	0.000284183	ENSMUSG00000047881	0.664571	3.95747	16.6195	4.56795e-05	0.0022381	ENSMUSG00000030528	-1.18984
ENSMUSG00000020641	1.11145	0.336842	19.7849	8.66624e-06	0.000444581	ENSMUSG00000059540	-0.257032	5.27272	20.9387	4.74227e-06	0.000246337							ENSMUSG00000030854	-1.63046	1.80305	14.0197	0.000180906	0.00882077	ENSMUSG00000031765	-0.928025	6.71611	22.0219	2.69557e-06	0.000123236	ENSMUSG00000027968	0.270613	4.90662	17.074	3.59504e-05	0.0016815	ENSMUSG00000024300	0.986441	1.67089	20.5245	5.88729e-06	0.00028438	ENSMUSG00000055817	-0.387684	4.61252	16.6137	4.58194e-05	0.0022381	ENSMUSG00000031645	-0.813581
ENSMUSG00000017778	0.197717	6.3831	19.632	9.38835e-06	0.000479868	ENSMUSG00000006711	0.288363	5.56837	20.9277	4.76958e-06	0.000246431							ENSMUSG00000036087	0.323946	6.18726	14.0123	0.000181617	0.00882077	ENSMUSG00000029452	-0.846272	2.65139	21.9359	2.81907e-06	0.000128412	ENSMUSG00000042032	0.266386	6.51088	17.047	3.64651e-05	0.00169935	ENSMUSG00000020143	1.01583	1.69355	20.5039	5.95086e-06	0.000286401	ENSMUSG00000023074	0.36631	4.03237	16.5315	4.78493e-05	0.00232872	ENSMUSG00000029447	-0.46513
ENSMUSG00000000738	0.495069	6.13797	19.5934	9.58002e-06	0.000486369	ENSMUSG00000029060	-0.188426	7.11869	20.9135	4.80497e-06	0.000246431							ENSMUSG00000002732	0.676698	1.46868	14.0101	0.000181836	0.00882077	ENSMUSG00000040850	-0.498049	8.42212	21.9235	2.83743e-06	0.000128778	ENSMUSG00000046330	0.381031	6.66867	17.0205	3.69791e-05	0.00171462	ENSMUSG00000039048	-0.355875	5.67826	20.4365	6.16417e-06	0.000294982	ENSMUSG00000039001	0.332551	7.20407	16.52	4.81397e-05	0.00233086	ENSMUSG00000019948	-0.69498
ENSMUSG00000038502	0.195087	7.20699	19.5924	9.58499e-06	0.000486369	ENSMUSG00000038374	-0.301654	5.46149	20.9123	4.80803e-06	0.000246431							ENSMUSG00000096433	0.674369	3.14081	14.0052	0.000182307	0.00882077	ENSMUSG00000029710	0.38625	6.46339	21.8719	2.91466e-06	0.000131804	ENSMUSG00000020029	0.501181	8.82021	17.0163	3.70612e-05	0.00171462	ENSMUSG00000020018	0.642276	2.5692	20.4267	6.19607e-06	0.000294982	ENSMUSG00000032330	0.320107	7.72029	16.5159	4.82428e-05	0.00233086	ENSMUSG00000022945	-1.81086
ENSMUSG00000075254	-0.310796	5.77328	19.5711	9.69244e-06	0.000488798	ENSMUSG00000107068	-0.963545	1.81888	20.9101	4.81358e-06	0.000246431							ENSMUSG00000118665	0.39438	4.64856	13.9963	0.000183175	0.00883073	ENSMUSG00000027829	-0.569339	5.24467	21.8374	2.96761e-06	0.000133714	ENSMUSG00000000563	0.263698	9.92039	16.9847	3.7682e-05	0.00173705	ENSMUSG00000029314	0.703581	3.10617	20.4266	6.19625e-06	0.000294982	ENSMUSG00000009647	0.28071	4.93048	16.5001	4.86483e-05	0.00234197	ENSMUSG00000036019	-1.33392
ENSMUSG00000052812	-0.309878	4.80303	19.5691	9.70267e-06	0.000488798	ENSMUSG00000052397	0.318779	5.85346	20.8902	4.86382e-06	0.000248107							ENSMUSG00000057880	0.602336	7.23554	13.9576	0.000186979	0.00894086	ENSMUSG00000033685	0.982148	6.95495	21.8114	3.00805e-06	0.000135048	ENSMUSG00000074818	1.49111	1.08872	16.9628	3.81188e-05	0.00175086	ENSMUSG00000042410	-0.817816	8.58888	20.3733	6.37111e-06	0.000301422	ENSMUSG00000020564	-0.452513	4.76989	16.437	5.02945e-05	0.00241251	ENSMUSG00000076437	0.710776
ENSMUSG00000027763	-0.246554	6.69887	19.5237	9.93586e-06	0.000494381	ENSMUSG00000041153	0.294833	4.11355	20.8518	4.9623e-06	0.000252223							ENSMUSG00000032192	0.668847	3.04613	13.9552	0.000187224	0.00894086	ENSMUSG00000046480	1.43487	4.60979	21.7733	3.06838e-06	0.000137263	ENSMUSG00000050856	0.329783	8.16468	16.8959	3.94877e-05	0.00180215	ENSMUSG00000046808	-0.719997	5.63447	20.3715	6.37724e-06	0.000301422	ENSMUSG00000021081	1.22333	5.50095	16.4221	5.06915e-05	0.00242283	ENSMUSG00000049580	-2.01846
ENSMUSG00000026496	-0.229499	6.52299	19.5232	9.93851e-06	0.000494381	ENSMUSG00000031708	-0.185137	8.62365	20.8362	5.00271e-06	0.00025337							ENSMUSG00000042659	0.451382	5.50981	13.949	0.000187842	0.00894086	ENSMUSG00000040498	-3.19934	3.48075	21.7499	3.10605e-06	0.000138452	ENSMUSG00000026923	-0.291619	5.94104	16.8944	3.95178e-05	0.00180215	ENSMUSG00000020482	-0.545648	5.51667	20.2313	6.86193e-06	0.000323172	ENSMUSG00000095677	3.08594	0.317006	16.4108	5.09941e-05	0.0024286	ENSMUSG00000029246	-0.841647
ENSMUSG00000021986	-0.31818	6.8079	19.5189	9.96078e-06	0.000494381	ENSMUSG00000041642	-0.190928	7.11399	20.7545	5.22081e-06	0.000263254							ENSMUSG00000034872	-0.69528	1.3487	13.946	0.000188137	0.00894086	ENSMUSG00000071176	0.378322	5.12555	21.7278	3.14202e-06	0.000139557	ENSMUSG00000031712	-1.45217	3.53038	16.8032	4.14627e-05	0.00187815	ENSMUSG00000038700	0.536445	3.52261	20.2163	6.91609e-06	0.000324564	ENSMUSG00000045092	0.483953	3.97109	16.3954	5.14093e-05	0.00243965	ENSMUSG00000044763	-0.431423
ENSMUSG00000044783	1.21104	5.13235	19.5171	9.97036e-06	0.000494381	ENSMUSG00000025736	-0.388179	4.29048	20.7493	5.23501e-06	0.000263254							ENSMUSG00000027580	-0.5729	7.3378	13.9364	0.000189104	0.00895494	ENSMUSG00000044501	-0.604555	3.09791	21.7201	3.15475e-06	0.000139625	ENSMUSG00000026090	-1.34196	1.30736	16.7999	4.15347e-05	0.00187815	ENSMUSG00000044167	-0.532058	5.99176	20.1971	6.98597e-06	0.000326681	ENSMUSG00000037664	-0.603131	4.16373	16.3521	5.25971e-05	0.00248341	ENSMUSG00000071176	1.3722
ENSMUSG00000053964	1.07443	0.6705	19.5133	9.98999e-06	0.000494381	ENSMUSG00000063406	0.305838	4.53699	20.7265	5.2977e-06	0.00026513							ENSMUSG00000037344	-0.523009	4.55519	13.9286	0.000189887	0.0089562	ENSMUSG00000075595	0.397019	6.44279	21.6678	3.24191e-06	0.000142416	ENSMUSG00000022263	-0.224418	6.21943	16.7956	4.1629e-05	0.00187815	ENSMUSG00000004951	-0.811462	3.97904	20.1464	7.17359e-06	0.000333239	ENSMUSG00000026189	0.762152	8.28084	16.3483	5.27039e-05	0.00248341	ENSMUSG00000028333	0.319678
ENSMUSG00000051934	0.237645	5.32044	19.4926	1.0099e-05	0.00049642	ENSMUSG00000031513	0.225317	6.3072	20.7222	5.30971e-06	0.00026513							ENSMUSG00000049555	-0.89744	2.04898	13.9228	0.000190472	0.0089562	ENSMUSG00000021047	-0.859025	2.96566	21.6618	3.25197e-06	0.000142416	ENSMUSG00000014498	-0.296817	6.6207	16.7891	4.17727e-05	0.00187815	ENSMUSG00000040061	0.908553	1.48141	20.1455	7.17676e-06	0.000333239	ENSMUSG00000056763	-0.518467	5.39143	16.3337	5.31114e-05	0.0024938	ENSMUSG00000079164	0.521976
ENSMUSG00000055003	0.232659	6.21508	19.4908	1.01085e-05	0.00049642	ENSMUSG00000072772	-0.23601	5.28278	20.7032	5.36276e-06	0.00026684							ENSMUSG00000043207	0.396412	5.62326	13.862	0.00019674	0.00921846	ENSMUSG00000021068	0.360816	4.88572	21.6509	3.27065e-06	0.000142416	ENSMUSG00000061731	-0.329355	5.2715	16.7793	4.19898e-05	0.00188129	ENSMUSG00000029089	0.513257	2.91763	20.0802	7.42617e-06	0.00034361	ENSMUSG00000057363	0.326898	5.45024	16.3258	5.33318e-05	0.00249537	ENSMUSG00000036908	0.471309
ENSMUSG00000049422	0.205765	6.66199	19.4853	1.01375e-05	0.00049642	ENSMUSG00000046613	-0.355274	6.25896	20.6805	5.42667e-06	0.000269076							ENSMUSG00000036966	-0.356458	5.71396	13.8339	0.000199701	0.00929872	ENSMUSG00000042548	0.41013	5.65344	21.6469	3.27734e-06	0.000142416	ENSMUSG00000046959	-1.81426	1.60854	16.7699	4.21964e-05	0.00188394	ENSMUSG00000003617	0.609878	5.36033	20.0269	7.63609e-06	0.000352088	ENSMUSG00000027908	-1.27687	1.04608	16.3072	5.38577e-05	0.00251116	ENSMUSG00000029994	-0.339791
ENSMUSG00000027164	-0.275834	4.45059	19.4661	1.02398e-05	0.000498371	ENSMUSG00000032308	-0.327221	5.03065	20.664	5.47346e-06	0.00027045							ENSMUSG00000026110	0.51555	8.95385	13.8325	0.000199845	0.00929872	ENSMUSG00000002083	0.731272	2.68106	21.6469	3.2774e-06	0.000142416	ENSMUSG00000035914	-0.428937	4.00654	16.7572	4.2481e-05	0.00189003	ENSMUSG00000000682	1.19992	1.35098	20.0113	7.69865e-06	0.000352294	ENSMUSG00000028266	-0.372845	6.1103	16.2939	5.42379e-05	0.00252008	ENSMUSG00000020638	1.12605
ENSMUSG00000019852	-0.429376	7.50698	19.4645	1.02486e-05	0.000498371	ENSMUSG00000021573	0.226481	8.86747	20.6122	5.62372e-06	0.000276553							ENSMUSG00000042672	-0.572289	3.35548	13.81	0.000202256	0.00937823	ENSMUSG00000031197	-0.341777	5.31237	21.6417	3.28626e-06	0.000142416	ENSMUSG00000017418	0.298335	4.73864	16.7227	4.32606e-05	0.00191804	ENSMUSG00000039220	-0.380055	5.79494	20.0083	7.71066e-06	0.000352294	ENSMUSG00000042246	0.872055	2.01069	16.2847	5.45023e-05	0.00252058	ENSMUSG00000026672	-0.406722
ENSMUSG00000031932	0.485205	4.80602	19.4565	1.02917e-05	0.000498739	ENSMUSG00000024006	-0.260289	5.65235	20.608	5.63598e-06	0.000276553							ENSMUSG00000038181	-0.674968	4.21317	13.7821	0.000205282	0.00948561	ENSMUSG00000002900	0.397749	6.99214	21.5855	3.38403e-06	0.000146146	ENSMUSG00000039166	0.483215	5.02898	16.6699	4.44807e-05	0.00196074	ENSMUSG00000049630	-1.01189	1.69677	20.0058	7.7207e-06	0.000352294	ENSMUSG00000023367	-0.595984	9.8148	16.2804	5.46268e-05	0.00252058	ENSMUSG00000041012	0.697053
ENSMUSG00000035885	0.19383	7.66031	19.4154	1.05154e-05	0.000506074	ENSMUSG00000009741	-0.250685	6.68073	20.5599	5.77941e-06	0.000282613							ENSMUSG00000036745	0.757871	3.00473	13.7571	0.000208029	0.00957938	ENSMUSG00000071072	-0.373371	6.36119	21.5387	3.4676e-06	0.000149238	ENSMUSG00000034333	0.609914	2.03707	16.6622	4.46616e-05	0.00196074	ENSMUSG00000035539	-1.35252	0.21071	19.9519	7.94155e-06	0.000361121	ENSMUSG00000029028	-0.236868	5.40351	16.2661	5.50393e-05	0.0025302	ENSMUSG00000028581	0.718126
ENSMUSG00000033943	-0.325561	6.30503	19.4114	1.05374e-05	0.000506074	ENSMUSG00000049225	0.302805	6.93014	20.534	5.85813e-06	0.000285478							ENSMUSG00000030733	-0.368877	6.24453	13.7358	0.000210401	0.00960373	ENSMUSG00000027346	-0.959587	8.10598	21.4932	3.55091e-06	0.000152299	ENSMUSG00000012422	0.290582	4.28012	16.6612	4.46845e-05	0.00196074	ENSMUSG00000020458	0.275419	6.80212	19.9413	7.98568e-06	0.00036188	ENSMUSG00000025736	-0.436136	5.42655	16.2601	5.52147e-05	0.0025302	ENSMUSG00000000266	-0.569681
ENSMUSG00000095315	-1.00677	1.53512	19.4089	1.05515e-05	0.000506074	ENSMUSG00000056763	-0.62881	5.1655	20.4593	6.09135e-06	0.000295827							ENSMUSG00000020407	1.02475	6.65707	13.7344	0.000210564	0.00960373	ENSMUSG00000037405	0.704874	4.02779	21.4618	3.6095e-06	0.000154281	ENSMUSG00000009145	-0.896577	1.80522	16.6543	4.48484e-05	0.0019612	ENSMUSG00000038745	0.481129	7.23034	19.8969	8.17348e-06	0.000369122	ENSMUSG00000029810	-0.624274	9.96722	16.2467	5.56076e-05	0.00253613	ENSMUSG00000003355	-1.04447
ENSMUSG00000018387	-0.529156	3.62087	19.3939	1.06348e-05	0.000506621	ENSMUSG00000043542	0.233016	5.87188	20.4503	6.12013e-06	0.00029602							ENSMUSG00000028137	-0.705659	2.60309	13.733	0.000210715	0.00960373	ENSMUSG00000022858	-0.418273	5.47271	21.4508	3.63027e-06	0.00015464	ENSMUSG00000056820	-0.308307	6.963	16.6453	4.50612e-05	0.00196378	ENSMUSG00000028573	-0.489341	6.27416	19.8531	8.36289e-06	0.000376387	ENSMUSG00000029310	0.237366	5.52584	16.2427	5.57244e-05	0.00253613	ENSMUSG00000056737	1.28942
ENSMUSG00000028195	-1.25377	2.7048	19.3938	1.06352e-05	0.000506621	ENSMUSG00000042155	0.228851	6.21565	20.445	6.13709e-06	0.00029602							ENSMUSG00000016356	-0.831002	2.37131	13.702	0.000214223	0.00973037	ENSMUSG00000008730	-0.417984	7.01883	21.4423	3.64631e-06	0.000154794	ENSMUSG00000030894	-0.371496	6.3278	16.6258	4.55275e-05	0.00197735	ENSMUSG00000045730	-0.842752	4.35548	19.7615	8.77321e-06	0.000393511	ENSMUSG00000090171	3.31373	2.22614	16.2022	5.69267e-05	0.00258203	ENSMUSG00000026107	-0.952472
ENSMUSG00000037972	0.246808	7.97567	19.3507	1.08779e-05	0.000516424	ENSMUSG00000029001	-0.253247	6.43081	20.4259	6.19867e-06	0.000297977							ENSMUSG00000038406	-0.334672	6.86974	13.6907	0.000215514	0.00975584	ENSMUSG00000067942	-0.507528	3.82134	21.4341	3.66201e-06	0.000154934	ENSMUSG00000020272	-0.471522	4.63741	16.6171	4.57363e-05	0.00197969	ENSMUSG00000024013	0.857795	1.80276	19.7499	8.82662e-06	0.000394565	ENSMUSG00000021750	0.565308	6.44999	16.0579	6.14349e-05	0.00277706	ENSMUSG00000035202	-0.857193
ENSMUSG00000053198	1.12227	1.07881	19.3128	1.10957e-05	0.000524986	ENSMUSG00000039199	-0.274281	5.71052	20.3995	6.28446e-06	0.000301081							ENSMUSG00000024580	0.399983	5.40709	13.6789	0.000216883	0.00978465	ENSMUSG00000032238	-0.470567	5.25859	21.4274	3.67474e-06	0.000154948	ENSMUSG00000027655	0.375484	4.86324	16.51	4.83951e-05	0.00208769	ENSMUSG00000032011	1.02815	1.27045	19.5805	9.64464e-06	0.000428937	ENSMUSG00000031504	0.2838	4.90004	16.0482	6.17512e-05	0.00278193	ENSMUSG00000028088	-0.854456
ENSMUSG00000078453	-0.552604	2.33754	19.256	1.14311e-05	0.000538968	ENSMUSG00000009575	0.222149	7.85198	20.3836	6.33712e-06	0.000302223							ENSMUSG00000054150	-0.783319	3.08324	13.6316	0.000222414	0.0100004	ENSMUSG00000024146	-0.382231	4.71533	21.3986	3.73043e-06	0.000156766	ENSMUSG00000020709	-0.603909	3.49384	16.4977	4.871e-05	0.0020942	ENSMUSG00000032020	-0.680805	4.21906	19.5774	9.66061e-06	0.000428937	ENSMUSG00000073755	-0.79933	2.52531	16.0241	6.25412e-05	0.00280804	ENSMUSG00000038900	0.708613
ENSMUSG00000018727	-1.18029	1.67473	19.2498	1.14682e-05	0.000538968	ENSMUSG00000021076	0.283676	6.61802	20.3794	6.35093e-06	0.000302223							ENSMUSG00000027940	-0.616624	7.9206	13.6246	0.000223236	0.0100037	ENSMUSG00000000078	-0.637231	6.2829	21.3435	3.8392e-06	0.000160548	ENSMUSG00000030409	-0.2476	9.87956	16.4764	4.92599e-05	0.00211074	ENSMUSG00000025902	0.470626	3.70807	19.5457	9.82225e-06	0.000434651	ENSMUSG00000041638	-0.282033	7.34318	15.9434	6.52653e-05	0.00291418	ENSMUSG00000019832	0.63376
ENSMUSG00000033705	-0.39896	5.07051	19.2276	1.16026e-05	0.000543459	ENSMUSG00000032500	0.29716	5.52716	20.3711	6.37866e-06	0.000302528							ENSMUSG00000048388	0.716719	2.0856	13.6098	0.000225009	0.0100494	ENSMUSG00000042670	-0.465526	5.56195	21.34	3.84614e-06	0.000160548	ENSMUSG00000038708	0.348848	9.15707	16.468	4.94786e-05	0.00211302	ENSMUSG00000026065	-0.999453	1.11536	19.5231	9.9389e-06	0.000436948	ENSMUSG00000071757	-0.278898	5.67462	15.9412	6.53424e-05	0.00291418	ENSMUSG00000039789	-0.456987
ENSMUSG00000033964	-0.33197	4.93589	19.2146	1.16816e-05	0.000545338	ENSMUSG00000049044	0.234709	8.5412	20.326	6.53083e-06	0.000308712							ENSMUSG00000038880	-0.592558	4.67602	13.6016	0.000225993	0.0100597	ENSMUSG00000035184	0.836235	1.89827	21.2742	3.98052e-06	0.000165603	ENSMUSG00000004233	-0.406942	3.34192	16.4506	4.99353e-05	0.00212468	ENSMUSG00000050628	0.407407	5.11709	19.5228	9.94042e-06	0.000436948	ENSMUSG00000025494	0.391638	6.60833	15.9223	6.59981e-05	0.00293167	ENSMUSG00000056962	-0.459967
ENSMUSG00000045071	-0.408496	4.0453	19.1471	1.21024e-05	0.000563101	ENSMUSG00000020739	-0.308144	5.14531	20.2873	6.66401e-06	0.000313961							ENSMUSG00000022865	0.485689	6.90334	13.5835	0.000228182	0.010091	ENSMUSG00000007812	-0.415353	5.11101	21.2379	4.05664e-06	0.000168209	ENSMUSG00000000532	-0.307053	4.89304	16.4449	5.00844e-05	0.00212468	ENSMUSG00000049957	-0.653657	4.75145	19.5068	1.00243e-05	0.00043917	ENSMUSG00000047675	0.244901	7.31522	15.9172	6.61741e-05	0.00293167	ENSMUSG00000052889	1.72278
ENSMUSG00000079104	-0.340521	3.38582	19.1328	1.21932e-05	0.000565451	ENSMUSG00000016382	0.233454	6.9917	20.2642	6.74496e-06	0.000316723							ENSMUSG00000029413	-0.451803	6.00061	13.5833	0.000228207	0.010091	ENSMUSG00000078566	-0.592239	6.78517	21.1975	4.14302e-06	0.000171222	ENSMUSG00000032330	0.266384	8.02298	16.4245	5.06261e-05	0.00214055	ENSMUSG00000028979	-1.71102	1.86923	19.4943	1.00903e-05	0.000439641	ENSMUSG00000051695	-0.235707	8.09817	15.8787	6.75335e-05	0.00298198	ENSMUSG00000029190	-0.413933
ENSMUSG00000038387	0.557082	3.34839	19.1201	1.22748e-05	0.000567353	ENSMUSG00000038773	-0.174087	6.51133	20.2434	6.81872e-06	0.00031913							ENSMUSG00000029376	0.49037	2.72669	13.5585	0.000231241	0.0101691	ENSMUSG00000042138	-0.481191	3.40698	21.178	4.18545e-06	0.000172061	ENSMUSG00000013662	0.258345	6.6569	16.4162	5.0849e-05	0.00214288	ENSMUSG00000081058	-1.24971	0.610733	19.4921	1.01017e-05	0.000439641	ENSMUSG00000041841	0.365653	6.33282	15.8588	6.82491e-05	0.00300364	ENSMUSG00000054000	1.06011
ENSMUSG00000024871	1.50165	2.66197	19.0749	1.25685e-05	0.000577455	ENSMUSG00000060301	0.423528	4.4092	20.2178	6.91063e-06	0.000322367							ENSMUSG00000038903	0.743672	5.03221	13.5529	0.000231934	0.0101691	ENSMUSG00000003346	0.369704	5.62445	21.1666	4.21042e-06	0.000172061	ENSMUSG00000028868	-0.270267	6.86655	16.4011	5.12565e-05	0.00215294	ENSMUSG00000038387	0.442625	4.35495	19.4839	1.01454e-05	0.000440088	ENSMUSG00000025196	2.92271	4.28147	15.8102	7.00247e-05	0.00307164	ENSMUSG00000046034	0.442004
ENSMUSG00000048087	0.789283	2.49395	19.0738	1.25758e-05	0.000577455	ENSMUSG00000042423	-0.235817	6.29052	20.2047	6.95809e-06	0.000323517							ENSMUSG00000021598	-0.527891	4.27074	13.5503	0.000232257	0.0101691	ENSMUSG00000065947	-2.13053	2.27164	21.1655	4.21273e-06	0.000172061	ENSMUSG00000068762	-1.27573	1.10241	16.3442	5.28168e-05	0.00221121	ENSMUSG00000004285	0.470202	6.77725	19.4584	1.02815e-05	0.000444532	ENSMUSG00000030224	-0.285817	6.50275	15.7964	7.05353e-05	0.0030839	ENSMUSG00000030034	0.378872
ENSMUSG00000029490	-1.57563	1.0907	19.0462	1.27595e-05	0.000583976	ENSMUSG00000015222	0.262365	9.96216	20.1547	7.14251e-06	0.000331006							ENSMUSG00000020774	0.618642	6.41725	13.5273	0.000235117	0.0102606	ENSMUSG00000007670	0.292662	6.2014	21.1629	4.21846e-06	0.000172061	ENSMUSG00000016493	0.814258	1.65841	16.322	5.34385e-05	0.00222586	ENSMUSG00000068329	0.335938	4.52117	19.4504	1.03244e-05	0.00044482	ENSMUSG00000033209	-0.447762	5.22814	15.7635	7.17724e-05	0.00312773	ENSMUSG00000004044	0.519621
ENSMUSG00000055866	-1.02794	5.38927	19.0189	1.29429e-05	0.000590442	ENSMUSG00000004364	0.183035	7.12953	20.148	7.16761e-06	0.000331088							ENSMUSG00000057346	-1.03173	5.35369	13.5186	0.000236215	0.010275	ENSMUSG00000055866	-2.45579	5.2325	21.143	4.26247e-06	0.000173219	ENSMUSG00000051557	-0.451237	3.06757	16.3193	5.35155e-05	0.00222586	ENSMUSG00000054717	0.462508	4.40809	19.4447	1.03556e-05	0.00044482	ENSMUSG00000022476	0.855354	4.40456	15.7305	7.30366e-05	0.00316942	ENSMUSG00000038400	1.02002
ENSMUSG00000027335	0.408446	4.72812	18.9608	1.3343e-05	0.000606717	ENSMUSG00000042350	0.216479	7.06648	20.1356	7.21419e-06	0.000332157							ENSMUSG00000026121	-0.552401	3.16955	13.5102	0.000237266	0.0102872	ENSMUSG00000028799	0.388923	4.56912	21.1376	4.27461e-06	0.000173219	ENSMUSG00000057530	-0.32771	7.19336	16.2938	5.42412e-05	0.00224808	ENSMUSG00000030498	-0.434227	8.4737	19.4356	1.0405e-05	0.000445491	ENSMUSG00000099032	1.38802	3.11856	15.7249	7.3255e-05	0.00316942	ENSMUSG00000078686	-3.4166
ENSMUSG00000018126	0.61779	1.94202	18.9366	1.35137e-05	0.000611627	ENSMUSG00000032418	0.281008	5.88066	20.0958	7.36567e-06	0.000337382							ENSMUSG00000028402	0.681467	3.10781	13.502	0.000238306	0.0102988	ENSMUSG00000030317	-1.42559	4.77297	21.0542	4.46468e-06	0.000180336	ENSMUSG00000068699	-0.353512	9.15196	16.2882	5.44019e-05	0.00224808	ENSMUSG00000051550	0.541529	5.14553	19.4263	1.04556e-05	0.000446207	ENSMUSG00000024955	0.265345	7.54752	15.72	7.34422e-05	0.00316942	ENSMUSG00000007041	0.543828
ENSMUSG00000038102	0.186316	6.33387	18.9331	1.35383e-05	0.000611627	ENSMUSG00000010529	-0.674536	1.69704	20.0934	7.37525e-06	0.000337382							ENSMUSG00000032745	0.522064	5.95029	13.4853	0.000240444	0.0103577	ENSMUSG00000026576	-0.400264	8.75953	21.0434	4.49006e-06	0.000180776	ENSMUSG00000040829	-1.02071	3.08205	16.2105	5.6678e-05	0.00232898	ENSMUSG00000048379	-0.350369	5.54933	19.3912	1.06496e-05	0.000453022	ENSMUSG00000079105	-0.865893	2.61776	15.697	7.43413e-05	0.00319788	ENSMUSG00000032420	1.98418
ENSMUSG00000064294	0.783958	1.03407	18.9193	1.36369e-05	0.000614097	ENSMUSG00000022439	-0.755133	2.70509	20.0308	7.62047e-06	0.000347479							ENSMUSG00000026158	0.719044	2.18655	13.422	0.00024869	0.0106785	ENSMUSG00000040123	-0.381342	5.34322	21.0127	4.56258e-06	0.000183105	ENSMUSG00000055725	-0.760708	1.3602	16.2029	5.6908e-05	0.00232898	ENSMUSG00000079260	-0.837091	5.23951	19.3279	1.10089e-05	0.000466797	ENSMUSG00000027536	0.536164	4.51518	15.6801	7.50111e-05	0.00321631	ENSMUSG00000015568	-1.57841
ENSMUSG00000000600	-0.247331	5.80519	18.9124	1.3686e-05	0.000614336	ENSMUSG00000029625	-0.31819	5.07907	19.9954	7.76301e-06	0.000352844							ENSMUSG00000028618	0.393699	8.35284	13.4108	0.000250184	0.0107082	ENSMUSG00000002985	0.706428	8.39375	21.0046	4.58187e-06	0.00018329	ENSMUSG00000056121	0.367115	6.48635	16.1982	5.70486e-05	0.00232898	ENSMUSG00000040471	0.751463	3.51562	19.2454	1.14946e-05	0.000483523	ENSMUSG00000054843	0.510737	7.23132	15.6577	7.59021e-05	0.00324409	ENSMUSG00000030499	-0.446391
ENSMUSG00000069874	0.835972	1.04165	18.8641	1.40366e-05	0.00062806	ENSMUSG00000053702	0.164154	6.38679	19.9846	7.80675e-06	0.000353698							ENSMUSG00000026027	-0.339721	4.89623	13.3776	0.000254643	0.0107858	ENSMUSG00000033526	-0.486613	6.36726	20.9464	4.72311e-06	0.000188336	ENSMUSG00000034617	0.368193	4.57133	16.1968	5.7089e-05	0.00232898	ENSMUSG00000034158	-0.493331	7.99447	19.24	1.15271e-05	0.000483523	ENSMUSG00000015090	-0.866136	1.33415	15.6155	7.76175e-05	0.0033068	ENSMUSG00000028710	0.64036
ENSMUSG00000071454	0.19454	5.82803	18.8531	1.41185e-05	0.000629711	ENSMUSG00000034163	-0.261132	6.20963	19.9573	7.91906e-06	0.000357644							ENSMUSG00000004317	0.527485	6.63333	13.3761	0.000254854	0.0107858	ENSMUSG00000018659	-0.420408	4.07543	20.9383	4.74327e-06	0.000188537	ENSMUSG00000053930	2.0614	0.415722	16.1251	5.9294e-05	0.00241122	ENSMUSG00000039621	0.550854	4.04272	19.237	1.15453e-05	0.000483523	ENSMUSG00000078864	-2.06727	0.388503	15.5988	7.83062e-05	0.00331752	ENSMUSG00000022350	-0.32796
ENSMUSG00000053774	-0.241744	5.91184	18.8342	1.42584e-05	0.000633935	ENSMUSG00000038717	-0.289794	4.83104	19.9393	7.99398e-06	0.000359881							ENSMUSG00000028199	-1.54721	3.59409	13.3744	0.000255078	0.0107858	ENSMUSG00000022200	-0.316197	6.24808	20.8927	4.85734e-06	0.000192458	ENSMUSG00000026155	-0.366644	3.00249	16.1025	6.00061e-05	0.00243244	ENSMUSG00000069763	-1.0503	1.27277	19.2362	1.155e-05	0.000483523	ENSMUSG00000024535	-0.363033	3.47802	15.5973	7.83666e-05	0.00331752	ENSMUSG00000048826	0.753862
ENSMUSG00000091474	-0.416015	4.53795	18.8235	1.43391e-05	0.000634844	ENSMUSG00000048154	-0.239557	8.02592	19.9315	8.02658e-06	0.000360205							ENSMUSG00000053644	-0.518735	4.08759	13.3733	0.000255228	0.0107858	ENSMUSG00000046574	0.414887	5.93011	20.879	4.89232e-06	0.000193231	ENSMUSG00000021047	0.923018	2.74394	16.0604	6.13526e-05	0.00247915	ENSMUSG00000022122	-0.533721	5.41647	19.2144	1.16831e-05	0.000487304	ENSMUSG00000032978	1.19492	7.27737	15.57	7.95074e-05	0.00335516	ENSMUSG00000014599	0.454162
ENSMUSG00000020723	0.219526	5.76189	18.8194	1.43696e-05	0.000634844	ENSMUSG00000022750	-0.174959	6.38134	19.8267	8.4792e-06	0.000379317							ENSMUSG00000038564	-0.352017	4.37278	13.3541	0.000257852	0.0108563	ENSMUSG00000020733	0.879829	3.42471	20.8729	4.9078e-06	0.000193231	ENSMUSG00000026463	-0.370991	5.32501	16.0235	6.25608e-05	0.00252	ENSMUSG00000062647	0.399504	8.20602	19.2093	1.17142e-05	0.000487304	ENSMUSG00000004032	0.598685	6.82602	15.5312	8.11548e-05	0.00341388	ENSMUSG00000028967	-1.10156
ENSMUSG00000077450	0.243778	7.04	18.7885	1.46047e-05	0.000641067	ENSMUSG00000042043	0.295246	4.74238	19.8185	8.51556e-06	0.000379746							ENSMUSG00000056162	-0.817085	5.20239	13.3493	0.000258522	0.0108563	ENSMUSG00000001138	0.437628	4.80355	20.8568	4.94936e-06	0.000194254	ENSMUSG00000024835	-0.423287	5.5085	15.9823	6.39365e-05	0.00256731	ENSMUSG00000012017	0.480849	4.98859	19.1841	1.18696e-05	0.000492216	ENSMUSG00000029446	0.340769	3.9721	15.4978	8.26034e-05	0.00346389	ENSMUSG00000030322	1.06985
ENSMUSG00000033364	-0.267981	5.0483	18.7881	1.46072e-05	0.000641067	ENSMUSG00000020589	0.289346	7.59257	19.8089	8.55853e-06	0.000380465							ENSMUSG00000027524	0.731221	5.60009	13.318	0.000262867	0.0109932	ENSMUSG00000029328	-0.284765	6.99248	20.8408	4.99094e-06	0.000195273	ENSMUSG00000071714	-1.23361	1.40011	15.9724	6.42721e-05	0.0025727	ENSMUSG00000032735	0.659366	3.57436	19.1267	1.22324e-05	0.000505668	ENSMUSG00000025557	-1.96545	0.744022	15.4803	8.33677e-05	0.00348498	ENSMUSG00000071177	-1.25737
ENSMUSG00000071302	-0.409164	4.2456	18.7795	1.46734e-05	0.000641067	ENSMUSG00000020747	-0.228707	6.83022	19.8018	8.59022e-06	0.000380681							ENSMUSG00000078503	2.25073	1.24845	13.3121	0.000263696	0.0109932	ENSMUSG00000029263	-0.449316	4.45509	20.7882	5.12983e-06	0.000200008	ENSMUSG00000032534	0.418953	5.53421	15.9548	6.48732e-05	0.00258834	ENSMUSG00000035877	-0.51097	7.05434	19.1156	1.23035e-05	0.000507019	ENSMUSG00000074489	-1.96223	0.353233	15.4633	8.41239e-05	0.00349886	ENSMUSG00000061313	-0.481419
ENSMUSG00000042097	0.429031	5.43406	18.7769	1.46935e-05	0.000641067	ENSMUSG00000029823	-0.230035	7.91569	19.7823	8.67827e-06	0.000383385							ENSMUSG00000009995	-0.376168	5.87621	13.3082	0.000264251	0.0109932	ENSMUSG00000022024	-0.344133	5.63034	20.7829	5.14403e-06	0.000200008	ENSMUSG00000029580	-0.439379	9.35539	15.9491	6.50682e-05	0.00258834	ENSMUSG00000072704	-0.466673	6.27211	19.1062	1.23646e-05	0.000507949	ENSMUSG00000001025	0.431678	4.12508	15.461	8.42245e-05	0.00349886	ENSMUSG00000049470	-0.353432
ENSMUSG00000055675	-0.176456	7.06628	18.7446	1.49447e-05	0.00065	ENSMUSG00000029403	0.249078	5.40835	19.7094	9.01591e-06	0.000397064							ENSMUSG00000044390	-0.748488	1.81514	13.2409	0.000273913	0.0113597	ENSMUSG00000026491	-0.371374	5.13593	20.76	5.20581e-06	0.000201782	ENSMUSG00000032215	1.9559	3.97067	15.9398	6.53905e-05	0.00259163	ENSMUSG00000029829	0.580184	4.63296	19.081	1.25285e-05	0.000512723	ENSMUSG00000042275	-0.4015	3.45973	15.4455	8.49167e-05	0.00351666	ENSMUSG00000020427	1.22767
ENSMUSG00000037640	-0.27807	5.17637	18.6808	1.54533e-05	0.000670043	ENSMUSG00000029714	-0.347169	6.91762	19.6907	9.10417e-06	0.00039971							ENSMUSG00000025726	-1.46708	7.37884	13.2348	0.000274798	0.0113612	ENSMUSG00000078716	0.356533	5.60913	20.7523	5.22685e-06	0.00020197	ENSMUSG00000021302	0.354357	4.3843	15.935	6.55569e-05	0.00259163	ENSMUSG00000038608	0.4676	3.07058	19.0741	1.25738e-05	0.000512723	ENSMUSG00000042312	0.478657	3.08226	15.4163	8.62408e-05	0.00356044	ENSMUSG00000058799	0.374277
ENSMUSG00000034275	-0.372171	7.08878	18.6707	1.55353e-05	0.000671517	ENSMUSG00000046959	-1.05644	1.82648	19.6659	9.22338e-06	0.000403694							ENSMUSG00000021094	0.524366	4.76107	13.2275	0.00027587	0.0113703	ENSMUSG00000091474	-0.571035	3.33443	20.7392	5.26281e-06	0.000202732	ENSMUSG00000036281	-0.282567	4.1632	15.9106	6.64045e-05	0.00261703	ENSMUSG00000004880	-0.508585	5.46713	19.0705	1.25974e-05	0.000512723	ENSMUSG00000066441	0.511334	4.18273	15.3803	8.78985e-05	0.00361768	ENSMUSG00000003762	0.684975
ENSMUSG00000032551	0.460522	3.22574	18.6275	1.58909e-05	0.000684776	ENSMUSG00000073434	-0.508454	4.70867	19.5907	9.59359e-06	0.000418605							ENSMUSG00000029544	-0.828879	0.549661	13.214	0.000277862	0.0114171	ENSMUSG00000047417	0.317243	5.15091	20.6842	5.416e-06	0.000207991	ENSMUSG00000090258	0.457513	3.62304	15.8994	6.68001e-05	0.00261957	ENSMUSG00000024811	-0.367438	7.19982	19.0604	1.26643e-05	0.000513857	ENSMUSG00000000171	0.254119	8.18497	15.2721	9.30805e-05	0.00381241	ENSMUSG00000074862	1.22642
ENSMUSG00000046330	0.305892	6.47845	18.6172	1.59772e-05	0.000686016	ENSMUSG00000018634	-0.377175	5.14854	19.5622	9.73755e-06	0.000423584							ENSMUSG00000032596	-0.584954	6.29275	13.2053	0.000279161	0.0114353	ENSMUSG00000038007	-1.09976	5.02572	20.6529	5.50545e-06	0.000210778	ENSMUSG00000056091	0.450212	5.88278	15.8972	6.68792e-05	0.00261957	ENSMUSG00000021423	1.12908	0.457448	19.0081	1.30162e-05	0.000526517	ENSMUSG00000050965	-0.466058	5.07215	15.2697	9.32017e-05	0.00381241	ENSMUSG00000020946	-0.462984
ENSMUSG00000047459	0.19543	6.63138	18.6075	1.6059e-05	0.000686016	ENSMUSG00000027201	-0.202626	6.31513	19.5143	9.98505e-06	0.000431687							ENSMUSG00000027889	-0.375614	5.55089	13.1927	0.000281042	0.0114772	ENSMUSG00000016344	0.422957	4.28425	20.6162	5.6119e-06	0.000214196	ENSMUSG00000040488	-0.350942	9.12883	15.879	6.75255e-05	0.0026368	ENSMUSG00000040253	0.91235	3.46887	19.0018	1.30594e-05	0.000526648	ENSMUSG00000038530	0.750952	2.21356	15.2593	9.37159e-05	0.00382172	ENSMUSG00000034617	-0.632596
ENSMUSG00000034936	-0.823775	4.05334	18.6066	1.60666e-05	0.000686016	ENSMUSG00000048445	-0.426948	3.46828	19.5128	9.99297e-06	0.000431687							ENSMUSG00000025026	0.429604	7.11783	13.177	0.000283413	0.0115387	ENSMUSG00000070808	0.329095	4.74787	20.6025	5.6523e-06	0.00021508	ENSMUSG00000020357	-0.35647	4.83014	15.8269	6.94101e-05	0.00270213	ENSMUSG00000057411	0.395944	4.90644	18.9803	1.32074e-05	0.000530995	ENSMUSG00000005054	0.307833	4.96939	15.2018	9.6611e-05	0.00392777	ENSMUSG00000059326	1.00356
ENSMUSG00000036908	0.446308	3.78758	18.5546	1.65107e-05	0.000702834	ENSMUSG00000062729	-0.39097	4.78424	19.5085	1.00152e-05	0.000431687							ENSMUSG00000026858	-0.55916	6.19818	13.1615	0.000285756	0.0115988	ENSMUSG00000033965	0.395873	4.33282	20.5932	5.67967e-06	0.000215465	ENSMUSG00000027454	0.814748	0.907756	15.805	7.02166e-05	0.00272522	ENSMUSG00000030847	-0.633007	5.53233	18.9539	1.33912e-05	0.000536748	ENSMUSG00000063253	0.529335	5.27332	15.1402	9.98149e-05	0.00404569	ENSMUSG00000022332	0.664215
ENSMUSG00000031441	-0.299049	6.57202	18.5482	1.65663e-05	0.000702845	ENSMUSG00000068686	-1.14285	-0.072356	19.4738	1.01991e-05	0.000438285							ENSMUSG00000037995	-0.623503	8.80945	13.146	0.000288139	0.0116442	ENSMUSG00000026819	-0.855729	3.49735	20.5504	5.80804e-06	0.000219667	ENSMUSG00000041771	-1.6455	1.35729	15.7898	7.07829e-05	0.00273887	ENSMUSG00000042406	-0.394857	6.36231	18.9326	1.35421e-05	0.000541149	ENSMUSG00000026417	-1.08252	9.4269	15.1158	0.000101114	0.00408594	ENSMUSG00000087006	0.820787
ENSMUSG00000022772	-0.200099	6.08574	18.543	1.66113e-05	0.000702845	ENSMUSG00000046111	-0.347249	4.93165	19.4628	1.02576e-05	0.000439466							ENSMUSG00000036402	0.454943	8.6631	13.1428	0.00028862	0.0116442	ENSMUSG00000037266	-0.464101	8.30681	20.4972	5.97176e-06	0.000224846	ENSMUSG00000075254	-0.297431	7.99705	15.7821	7.10734e-05	0.0027418	ENSMUSG00000052160	0.769732	2.16048	18.8969	1.37978e-05	0.000549702	ENSMUSG00000001348	0.470849	6.24946	15.0754	0.0001033	0.00416166	ENSMUSG00000022299	-0.841301
ENSMUSG00000010651	-1.11809	1.00471	18.5261	1.67592e-05	0.000706966	ENSMUSG00000010721	0.241009	5.10807	19.4509	1.03218e-05	0.000439845							ENSMUSG00000028133	-0.625109	2.01076	13.1337	0.000290031	0.0116659	ENSMUSG00000002346	0.42765	6.91017	20.4892	5.99699e-06	0.000224846	ENSMUSG00000043162	0.673992	5.56599	15.7558	7.20681e-05	0.0027718	ENSMUSG00000021214	-3.59628	4.06796	18.8807	1.39152e-05	0.000552709	ENSMUSG00000090486	0.748058	7.19747	15.0492	0.000104745	0.00420714	ENSMUSG00000007570	0.47783
ENSMUSG00000003072	0.195295	7.4546	18.5028	1.69651e-05	0.000713503	ENSMUSG00000015869	-0.196675	5.58087	19.4497	1.03285e-05	0.000439845							ENSMUSG00000020368	0.546349	9.32117	13.097	0.000295772	0.0118611	ENSMUSG00000049882	1.03001	1.73771	20.4859	6.00726e-06	0.000224846	ENSMUSG00000022489	-0.693621	2.3211	15.7487	7.23384e-05	0.00277384	ENSMUSG00000033222	0.592152	3.22989	18.87	1.39938e-05	0.000554164	ENSMUSG00000005687	0.228564	5.26528	15.0267	0.000106003	0.0042449	ENSMUSG00000025780	-1.23694
ENSMUSG00000030307	0.26546	8.59853	18.4541	1.74042e-05	0.000729778	ENSMUSG00000064373	0.256585	7.61029	19.4207	1.04863e-05	0.000445229							ENSMUSG00000003555	1.53628	1.31864	13.0615	0.000301429	0.0120518	ENSMUSG00000039621	0.668742	4.28501	20.4828	6.01703e-06	0.000224846	ENSMUSG00000022194	-0.287817	4.75015	15.71	7.38328e-05	0.00282267	ENSMUSG00000021338	-0.4481	5.32263	18.8143	1.44083e-05	0.000568867	ENSMUSG00000006676	-0.217911	7.53524	15.0132	0.000106763	0.00425248	ENSMUSG00000057191	0.904222
ENSMUSG00000049047	-0.222255	5.59097	18.4352	1.75779e-05	0.00073486	ENSMUSG00000026211	-0.280664	5.41927	19.4085	1.05539e-05	0.000445888							ENSMUSG00000027630	0.411828	6.40355	13.0227	0.000307739	0.0122521	ENSMUSG00000044017	0.805049	3.22817	20.4736	6.04588e-06	0.00022507	ENSMUSG00000022425	-0.668779	4.20478	15.6838	7.48626e-05	0.00285349	ENSMUSG00000023266	0.47999	4.41042	18.8049	1.44794e-05	0.000569971	ENSMUSG00000024843	-0.347512	6.01707	15.0099	0.000106946	0.00425248	ENSMUSG00000058921	-0.391511
ENSMUSG00000089997	1.72603	2.22922	18.4266	1.76573e-05	0.000735983	ENSMUSG00000047798	-1.02296	1.04949	19.4009	1.05958e-05	0.000445888							ENSMUSG00000036054	-0.361688	4.59212	13.0194	0.000308274	0.0122521	ENSMUSG00000044018	-0.34628	5.93611	20.4694	6.05909e-06	0.00022507	ENSMUSG00000016194	-0.554399	3.86179	15.6608	7.57796e-05	0.00287985	ENSMUSG00000007656	-0.413652	7.14839	18.7834	1.46434e-05	0.000574711	ENSMUSG00000028278	0.51703	5.692	15.0064	0.000107149	0.00425248	ENSMUSG00000003134	-1.14126
ENSMUSG00000074637	0.333018	5.53598	18.42	1.77185e-05	0.000736343	ENSMUSG00000020549	-0.204929	5.0616	19.3987	1.06078e-05	0.000445888							ENSMUSG00000046223	0.805867	2.81774	12.9923	0.000312774	0.0123874	ENSMUSG00000002763	1.03636	5.74677	20.4494	6.12299e-06	0.000226769	ENSMUSG00000013584	-0.963659	3.15314	15.6522	7.61241e-05	0.00288436	ENSMUSG00000019301	-1.83406	1.7426	18.7347	1.5022e-05	0.000587821	ENSMUSG00000038602	1.59348	1.06717	14.9934	0.000107889	0.00426914	ENSMUSG00000034636	-0.423779
ENSMUSG00000027210	0.452112	6.88742	18.4117	1.77963e-05	0.000737389	ENSMUSG00000028601	-0.628001	3.70449	19.3952	1.06276e-05	0.000445888							ENSMUSG00000028064	0.535513	7.85694	12.9878	0.000313534	0.0123874	ENSMUSG00000039166	-0.40461	5.15234	20.4367	6.16377e-06	0.000227604	ENSMUSG00000004610	0.273776	6.11724	15.6372	7.67285e-05	0.00289866	ENSMUSG00000019813	0.602075	2.21092	18.7284	1.50719e-05	0.000588026	ENSMUSG00000039543	-0.929298	1.1024	14.9784	0.00010875	0.00429049	ENSMUSG00000048706	-0.759776
ENSMUSG00000030870	-0.227072	6.59456	18.3924	1.79775e-05	0.000742698	ENSMUSG00000038437	-0.223135	8.15967	19.3734	1.07497e-05	0.000449679							ENSMUSG00000070304	-0.740353	2.40816	12.9596	0.000318282	0.0125379	ENSMUSG00000112148	-2.21745	1.46405	20.4299	6.18549e-06	0.000227698	ENSMUSG00000021072	0.523547	6.32486	15.6289	7.70661e-05	0.00290282	ENSMUSG00000039653	1.48374	1.62931	18.7136	1.51896e-05	0.00059087	ENSMUSG00000020990	-0.451697	6.88854	14.9671	0.000109405	0.00430357	ENSMUSG00000037860	1.53186
ENSMUSG00000090112	-0.256176	5.8974	18.3662	1.82267e-05	0.000750778	ENSMUSG00000089715	0.166319	8.83511	19.3663	1.07895e-05	0.000449942							ENSMUSG00000035835	-0.543391	3.44198	12.951	0.000319743	0.0125584	ENSMUSG00000062014	-0.328673	5.40137	20.4246	6.20281e-06	0.000227698	ENSMUSG00000027318	-0.84552	2.47247	15.6107	7.78138e-05	0.00292237	ENSMUSG00000028680	-1.60564	4.37056	18.7003	1.52959e-05	0.000593257	ENSMUSG00000074261	-0.47924	6.76027	14.9508	0.000110349	0.00432796	ENSMUSG00000066798	-0.480304
ENSMUSG00000012422	-0.228385	5.7121	18.3483	1.83987e-05	0.00075345	ENSMUSG00000039254	-0.275198	4.59397	19.361	1.08194e-05	0.000449942							ENSMUSG00000025326	0.494792	5.56699	12.9173	0.000325554	0.0127491	ENSMUSG00000043671	0.866985	1.92828	20.3613	6.41145e-06	0.000234667	ENSMUSG00000029701	0.325277	5.08998	15.5968	7.83866e-05	0.00293524	ENSMUSG00000049878	-0.573012	5.27259	18.6821	1.54426e-05	0.000597189	ENSMUSG00000025579	-0.445745	6.9091	14.9229	0.000111994	0.00437958	ENSMUSG00000025173	-0.473946
ENSMUSG00000030759	-0.197841	6.58308	18.3482	1.83991e-05	0.00075345	ENSMUSG00000022185	-0.250336	7.4485	19.3387	1.09468e-05	0.000453893							ENSMUSG00000054676	1.86752	7.96933	12.9107	0.00032671	0.012757	ENSMUSG00000024300	0.848444	2.62738	20.3494	6.45116e-06	0.000235298	ENSMUSG00000031448	-0.446287	8.8376	15.5687	7.95613e-05	0.00297052	ENSMUSG00000056648	0.484693	5.24458	18.671	1.55326e-05	0.000598914	ENSMUSG00000028295	0.365156	3.5206	14.9113	0.000112684	0.00439369	ENSMUSG00000002885	0.573274
ENSMUSG00000004500	-0.326122	3.85696	18.3354	1.85235e-05	0.000756333	ENSMUSG00000038271	-0.208093	6.3899	19.3331	1.09784e-05	0.000453893							ENSMUSG00000074715	0.945946	5.55938	12.9019	0.00032825	0.0127797	ENSMUSG00000034157	-0.527363	6.3759	20.3449	6.4664e-06	0.000235298	ENSMUSG00000025584	0.477826	4.724	15.5141	8.18916e-05	0.00304861	ENSMUSG00000034586	-0.61958	2.37261	18.6173	1.59763e-05	0.000613162	ENSMUSG00000004891	-0.366708	4.93711	14.8937	0.000113741	0.00442199	ENSMUSG00000042202	-0.616151
ENSMUSG00000034891	0.184702	9.126	18.3063	1.88087e-05	0.000765743	ENSMUSG00000030554	0.282466	5.65563	19.3138	1.10903e-05	0.000457184							ENSMUSG00000034853	-0.559376	6.28637	12.892	0.000329994	0.0128103	ENSMUSG00000008496	2.01179	1.74109	20.3224	6.543e-06	0.000237393	ENSMUSG00000024640	-0.669278	2.07001	15.502	8.24185e-05	0.00305049	ENSMUSG00000026594	-0.564837	5.13284	18.6151	1.59951e-05	0.000613162	ENSMUSG00000008036	0.320739	5.76207	14.8753	0.000114854	0.00445227	ENSMUSG00000026333	-0.958921
ENSMUSG00000029623	0.261715	6.0522	18.2806	1.90641e-05	0.000773894	ENSMUSG00000035107	-0.224783	5.18573	19.2564	1.14286e-05	0.000468806							ENSMUSG00000035266	0.418324	3.15289	12.8759	0.000332839	0.0128571	ENSMUSG00000051506	1.39495	2.18594	20.2451	6.81274e-06	0.000246463	ENSMUSG00000037112	-0.36336	4.21581	15.4862	8.31085e-05	0.00305049	ENSMUSG00000024052	-0.483948	6.65779	18.6054	1.60767e-05	0.000614503	ENSMUSG00000022261	0.564295	7.5033	14.8522	0.000116275	0.00449427	ENSMUSG00000020687	-0.362109
ENSMUSG00000044628	0.174146	6.96806	18.2351	1.95248e-05	0.000790303	ENSMUSG00000030002	-0.334952	6.74082	19.2548	1.14383e-05	0.000468806							ENSMUSG00000027004	1.10217	0.88354	12.8727	0.000333407	0.0128571	ENSMUSG00000053819	-0.40772	7.84992	20.1321	7.22718e-06	0.000260544	ENSMUSG00000036256	-0.390452	7.73524	15.4846	8.3181e-05	0.00305049	ENSMUSG00000039765	0.56386	4.55327	18.5964	1.61526e-05	0.000615619	ENSMUSG00000030336	-0.949238	0.98232	14.8351	0.000117334	0.00451421	ENSMUSG00000029338	-0.570277
ENSMUSG00000036334	-0.542434	3.11344	18.2224	1.96549e-05	0.000790949	ENSMUSG00000013539	-0.185678	6.07768	19.2242	1.16231e-05	0.000474712							ENSMUSG00000056153	0.523486	4.48963	12.8637	0.000335011	0.0128571	ENSMUSG00000001911	0.340422	8.02745	20.1278	7.24371e-06	0.000260544	ENSMUSG00000040374	0.32521	5.22003	15.4807	8.33502e-05	0.00305049	ENSMUSG00000040940	0.273176	6.4688	18.5761	1.63258e-05	0.000619734	ENSMUSG00000039257	-0.993001	1.52002	14.8329	0.000117468	0.00451421	ENSMUSG00000098176	0.875319
ENSMUSG00000022553	0.188618	6.0561	18.2153	1.97286e-05	0.000790949	ENSMUSG00000023809	0.281087	5.91653	19.2199	1.16494e-05	0.000474712							ENSMUSG00000028232	0.620306	4.19541	12.8635	0.000335051	0.0128571	ENSMUSG00000073982	0.413959	4.16984	20.064	7.48943e-06	0.000268139	ENSMUSG00000032745	0.292114	5.39014	15.4807	8.33523e-05	0.00305049	ENSMUSG00000051177	-0.393771	5.58455	18.5727	1.63546e-05	0.000619734	ENSMUSG00000031119	-0.333124	8.61319	14.8206	0.000118235	0.00452692	ENSMUSG00000036390	1.29256
ENSMUSG00000066232	-0.195339	7.13345	18.2132	1.97506e-05	0.000790949	ENSMUSG00000022556	-0.310834	5.56404	19.2068	1.17294e-05	0.000476605							ENSMUSG00000024327	-0.549393	3.54299	12.8501	0.000337467	0.0129127	ENSMUSG00000023066	-0.634798	3.33869	20.0565	7.51883e-06	0.000268139	ENSMUSG00000026972	-0.504365	2.77988	15.4802	8.33753e-05	0.00305049	ENSMUSG00000029330	-0.419319	6.49063	18.5559	1.64993e-05	0.000623428	ENSMUSG00000056313	0.356396	4.23621	14.8168	0.000118477	0.00452692	ENSMUSG00000038930	0.825156
ENSMUSG00000022354	0.224777	6.01501	18.2116	1.97667e-05	0.000790949	ENSMUSG00000022999	-0.39941	3.9245	19.1684	1.19676e-05	0.000484892							ENSMUSG00000028607	-0.544159	7.10911	12.8392	0.000339427	0.0129506	ENSMUSG00000037236	-0.346049	5.78754	20.0564	7.51932e-06	0.000268139	ENSMUSG00000074238	0.221953	4.79848	15.4733	8.36779e-05	0.00305281	ENSMUSG00000045211	0.497769	3.28183	18.5427	1.66143e-05	0.00062598	ENSMUSG00000047547	0.240825	7.01856	14.7956	0.000119816	0.00456499	ENSMUSG00000031583	0.465801
ENSMUSG00000033222	0.84664	1.72849	18.2004	1.98838e-05	0.000793371	ENSMUSG00000003848	-0.271955	5.22468	19.1563	1.20439e-05	0.000485297							ENSMUSG00000021993	-0.451168	4.49727	12.8273	0.0003416	0.0129964	ENSMUSG00000036372	0.33826	5.21504	20.0365	7.59776e-06	0.000270164	ENSMUSG00000071253	0.324534	4.93209	15.4485	8.47859e-05	0.00308031	ENSMUSG00000036661	0.502474	5.74501	18.4567	1.73804e-05	0.00065166	ENSMUSG00000071662	0.273196	4.88923	14.7017	0.000125932	0.00478434	ENSMUSG00000067199	1.1124
ENSMUSG00000045251	0.355941	3.33507	18.173	2.01718e-05	0.000802574	ENSMUSG00000041954	-0.633092	1.83483	19.156	1.2046e-05	0.000485297							ENSMUSG00000026544	-1.0674	1.88437	12.8152	0.000343823	0.0130438	ENSMUSG00000026617	-0.474528	4.70412	20.0276	7.63311e-06	0.00027065	ENSMUSG00000079227	-1.2594	2.62587	15.4456	8.49142e-05	0.00308031	ENSMUSG00000024622	-0.346146	5.54519	18.4552	1.73947e-05	0.00065166	ENSMUSG00000033793	0.290523	6.84851	14.6948	0.000126394	0.00478825	ENSMUSG00000025538	0.597496
ENSMUSG00000041841	0.220239	6.64567	18.1456	2.04643e-05	0.000811906	ENSMUSG00000003068	-0.157507	6.64835	19.1201	1.22748e-05	0.000493113							ENSMUSG00000078502	1.88103	1.16609	12.8038	0.000345908	0.0130857	ENSMUSG00000079037	-0.339714	7.54683	19.9985	7.75033e-06	0.000274028	ENSMUSG00000040339	-0.428022	4.85344	15.438	8.52553e-05	0.00308392	ENSMUSG00000073421	0.835525	5.41859	18.4263	1.76599e-05	0.000659721	ENSMUSG00000051149	-0.614046	3.0301	14.6592	0.000128805	0.00486576	ENSMUSG00000032575	-0.465951
ENSMUSG00000110185	-0.307579	6.8157	18.1311	2.0621e-05	0.000815809	ENSMUSG00000073481	0.282772	5.32549	19.1004	1.24018e-05	0.000496808							ENSMUSG00000015755	0.290975	6.59169	12.7974	0.000347102	0.0130938	ENSMUSG00000075704	-0.401061	4.96887	19.9839	7.8097e-06	0.000275347	ENSMUSG00000070814	0.331397	4.05932	15.4194	8.61003e-05	0.00310569	ENSMUSG00000020614	0.853722	3.07754	18.4057	1.78521e-05	0.000665015	ENSMUSG00000061983	0.348539	7.17847	14.6319	0.000130683	0.00492275	ENSMUSG00000037902	0.658083
ENSMUSG00000031657	-0.270216	4.94422	18.0995	2.09659e-05	0.000826075	ENSMUSG00000021134	-0.268644	8.30748	19.0691	1.26072e-05	0.000502334							ENSMUSG00000033423	-0.390205	4.79499	12.7884	0.000348768	0.0131196	ENSMUSG00000040283	-0.596841	5.37144	19.9445	7.97212e-06	0.000280282	ENSMUSG00000074794	0.421943	5.81536	15.3959	8.71775e-05	0.00313569	ENSMUSG00000022098	0.538592	3.65693	18.3879	1.80197e-05	0.000668004	ENSMUSG00000033799	-0.4715	5.0848	14.5854	0.000133951	0.00503164	ENSMUSG00000000957	0.730977
ENSMUSG00000056305	0.295793	4.99534	18.0965	2.09984e-05	0.000826075	ENSMUSG00000018796	0.181425	5.83415	19.0685	1.26106e-05	0.000502334							ENSMUSG00000021226	-0.962841	3.20695	12.7744	0.000351387	0.013181	ENSMUSG00000053080	0.312238	5.83169	19.9133	8.10363e-06	0.000283971	ENSMUSG00000021537	0.566853	4.42327	15.369	8.84286e-05	0.00316723	ENSMUSG00000041075	0.476191	4.71411	18.3864	1.80336e-05	0.000668004	ENSMUSG00000049504	-0.312779	4.8477	14.575	0.000134693	0.00504532	ENSMUSG00000021240	-0.484689
ENSMUSG00000063765	0.303121	4.31489	18.0791	2.11912e-05	0.000831324	ENSMUSG00000036057	-0.210885	6.63638	19.0149	1.29698e-05	0.000515197							ENSMUSG00000049775	0.511843	9.35192	12.7536	0.000355318	0.0132911	ENSMUSG00000027074	-0.515262	6.15778	19.9088	8.12256e-06	0.000283971	ENSMUSG00000059851	-0.312394	4.48066	15.3664	8.85505e-05	0.00316723	ENSMUSG00000038801	-1.25899	0.563812	18.369	1.81996e-05	0.000672263	ENSMUSG00000018678	-0.301	4.25903	14.5647	0.000135425	0.00505852	ENSMUSG00000021810	0.341815
ENSMUSG00000041828	0.828226	3.11222	18.0459	2.15647e-05	0.000843615	ENSMUSG00000020180	0.241133	5.5107	18.996	1.30994e-05	0.00051889							ENSMUSG00000022568	-0.301594	6.33291	12.7151	0.000362713	0.0135298	ENSMUSG00000024942	0.304757	5.20403	19.8724	8.27854e-06	0.000288616	ENSMUSG00000051439	-1.0307	3.58666	15.3353	9.00165e-05	0.00321067	ENSMUSG00000029103	-0.342889	9.19624	18.3094	1.87774e-05	0.000691001	ENSMUSG00000025794	0.237331	7.43493	14.5527	0.000136297	0.00506516	ENSMUSG00000001542	-0.683432
ENSMUSG00000055531	-0.213821	6.84205	18.0289	2.17572e-05	0.000848773	ENSMUSG00000012819	-0.562856	2.87048	18.9728	1.32596e-05	0.000523774							ENSMUSG00000053693	-0.825448	1.92684	12.7072	0.00036426	0.0135361	ENSMUSG00000004044	0.242762	8.35735	19.8482	8.38403e-06	0.00029116	ENSMUSG00000024993	0.442899	4.03189	15.3284	9.03501e-05	0.00321311	ENSMUSG00000034538	-0.766923	1.27197	18.3029	1.88425e-05	0.000691001	ENSMUSG00000003420	0.552985	7.33492	14.5517	0.000136362	0.00506516	ENSMUSG00000023800	2.00002
ENSMUSG00000031666	-0.218131	5.39719	18.0221	2.18357e-05	0.000849468	ENSMUSG00000068457	-0.355076	4.61131	18.9054	1.37366e-05	0.000541106							ENSMUSG00000025612	0.684912	7.20691	12.7038	0.00036491	0.0135361	ENSMUSG00000032264	-0.401589	4.07447	19.845	8.39818e-06	0.00029116	ENSMUSG00000035722	-0.257356	5.22909	15.3202	9.07406e-05	0.00321311	ENSMUSG00000026482	-0.366959	8.26634	18.3007	1.88641e-05	0.000691001	ENSMUSG00000053329	0.229761	7.70657	14.5404	0.000137183	0.00508147	ENSMUSG00000029672	-0.510921
ENSMUSG00000059839	-0.388776	3.54323	18.0037	2.20481e-05	0.000855355	ENSMUSG00000012114	-0.161333	6.33155	18.895	1.38111e-05	0.000542537							ENSMUSG00000030319	-0.560528	2.82442	12.6873	0.000368138	0.0136181	ENSMUSG00000044258	-1.16277	3.38786	19.8338	8.44756e-06	0.000292061	ENSMUSG00000048058	-0.359526	3.15811	15.3181	9.08396e-05	0.00321311	ENSMUSG00000031770	-0.828623	8.14826	18.2615	1.92557e-05	0.0007023	ENSMUSG00000024983	-0.249836	6.01744	14.452	0.000143774	0.00531087	ENSMUSG00000027995	0.973411
ENSMUSG00000021069	0.666468	2.42847	17.9586	2.25761e-05	0.000873422	ENSMUSG00000036995	-0.421412	3.07985	18.8841	1.38903e-05	0.000543909							ENSMUSG00000021495	-0.440606	5.93084	12.6667	0.000372226	0.0136981	ENSMUSG00000027387	-0.4744	3.29529	19.8176	8.51958e-06	0.000293737	ENSMUSG00000031984	0.224313	6.32238	15.2909	9.21576e-05	0.00324982	ENSMUSG00000021094	0.556568	3.52155	18.2592	1.9279e-05	0.0007023	ENSMUSG00000043162	0.506135	4.80025	14.4082	0.000147162	0.00542099	ENSMUSG00000027405	-0.416556
ENSMUSG00000113255	-1.87957	0.861183	17.9471	2.27126e-05	0.000875989	ENSMUSG00000000202	-0.280054	5.0678	18.8745	1.39604e-05	0.000543909							ENSMUSG00000042734	-1.15493	0.496206	12.6661	0.000372353	0.0136981	ENSMUSG00000002808	-0.636269	4.41453	19.803	8.5847e-06	0.000294362	ENSMUSG00000072875	0.695547	3.49779	15.2863	9.23865e-05	0.00324982	ENSMUSG00000002129	-0.262056	5.81981	18.1984	1.99046e-05	0.000723091	ENSMUSG00000052605	1.01302	3.72117	14.3898	0.000148607	0.00545914	ENSMUSG00000034574	-0.491554
ENSMUSG00000009555	0.21087	6.29916	17.9425	2.27676e-05	0.000875989	ENSMUSG00000031563	0.200007	5.68148	18.8744	1.39611e-05	0.000543909							ENSMUSG00000054874	-0.291545	6.80779	12.619	0.000381845	0.0139855	ENSMUSG00000020357	0.364274	4.67659	19.803	8.58486e-06	0.000294362	ENSMUSG00000028583	-0.582054	2.63337	15.2551	9.39224e-05	0.00329477	ENSMUSG00000038506	-0.729085	5.55944	18.1725	2.0177e-05	0.00072867	ENSMUSG00000045854	0.372455	4.29511	14.383	0.000149145	0.00546386	ENSMUSG00000037731	0.907551
ENSMUSG00000013833	0.223132	5.91189	17.8647	2.37184e-05	0.000910071	ENSMUSG00000024045	-0.318271	7.03194	18.8499	1.41419e-05	0.000549442							ENSMUSG00000029366	0.535418	4.13904	12.617	0.00038226	0.0139855	ENSMUSG00000029321	-1.26998	2.35625	19.7442	8.85316e-06	0.000302729	ENSMUSG00000048920	-0.293935	6.12314	15.2172	9.58268e-05	0.00335236	ENSMUSG00000023150	-0.360765	9.46229	18.1699	2.02046e-05	0.00072867	ENSMUSG00000019577	0.846345	5.16708	14.375	0.00014978	0.0054721	ENSMUSG00000034501	0.826318
ENSMUSG00000028639	0.175086	7.03426	17.8404	2.40224e-05	0.000919216	ENSMUSG00000009555	-0.246608	6.39555	18.7661	1.47769e-05	0.000572544							ENSMUSG00000072972	0.841722	1.32939	12.6065	0.00038441	0.0140146	ENSMUSG00000020300	-0.557122	6.40159	19.729	8.92383e-06	0.000304312	ENSMUSG00000026135	-0.307075	4.32336	15.1983	9.67905e-05	0.00337682	ENSMUSG00000038880	0.489104	5.0966	18.1681	2.0224e-05	0.00072867	ENSMUSG00000034480	-0.412005	4.58832	14.3416	0.000152457	0.00555468	ENSMUSG00000047213	-0.355306
ENSMUSG00000055150	0.643033	2.09056	17.8144	2.43538e-05	0.000929358	ENSMUSG00000022228	-0.230445	6.08525	18.7244	1.51037e-05	0.000583613							ENSMUSG00000015478	-0.339791	6.22732	12.5959	0.000386587	0.0140146	ENSMUSG00000037174	-0.325389	5.80519	19.6983	9.06831e-06	0.000308397	ENSMUSG00000058799	0.226707	6.51128	15.1794	9.77633e-05	0.00340147	ENSMUSG00000027200	0.441112	4.03554	18.1579	2.03329e-05	0.0007306	ENSMUSG00000002781	0.305704	5.63463	14.3285	0.000153525	0.0055727	ENSMUSG00000079363	1.39914
ENSMUSG00000041308	-0.358241	5.0532	17.8085	2.44283e-05	0.00092967	ENSMUSG00000030279	-0.198555	6.34068	18.6889	1.53878e-05	0.000592973							ENSMUSG00000032860	0.632737	5.53438	12.5956	0.000386655	0.0140146	ENSMUSG00000018893	-0.302083	12.9031	19.6713	9.19721e-06	0.000311458	ENSMUSG00000015085	-0.485139	3.3914	15.1414	9.97503e-05	0.00346117	ENSMUSG00000054676	1.4632	7.22129	18.1409	2.0515e-05	0.000732577	ENSMUSG00000035561	1.22047	1.28015	14.3253	0.000153787	0.0055727	ENSMUSG00000022237	-0.529119
ENSMUSG00000068117	0.886968	2.18142	17.7975	2.45707e-05	0.000932556	ENSMUSG00000048027	0.200001	6.64225	18.6788	1.54695e-05	0.000594505							ENSMUSG00000015733	0.324777	7.48037	12.5892	0.000387982	0.0140146	ENSMUSG00000006800	0.551782	6.82353	19.669	9.20825e-06	0.000311458	ENSMUSG00000042851	0.480721	3.51526	15.1339	0.000100147	0.00346551	ENSMUSG00000000278	-0.503298	7.44232	18.1405	2.05185e-05	0.000732577	ENSMUSG00000030761	-0.405266	5.02701	14.308	0.000155205	0.00560882	ENSMUSG00000056671	1.51007
ENSMUSG00000038126	-0.391032	5.29392	17.7031	2.58211e-05	0.000977362	ENSMUSG00000045302	-0.171317	6.36864	18.6728	1.55183e-05	0.000594623							ENSMUSG00000027763	0.467555	7.19237	12.5877	0.000388304	0.0140146	ENSMUSG00000097392	-0.54151	3.98887	19.6538	9.28169e-06	0.000313094	ENSMUSG00000021180	0.410394	4.15188	15.1241	0.000100671	0.00347233	ENSMUSG00000038569	0.872436	1.6008	18.1372	2.05546e-05	0.000732577	ENSMUSG00000024610	-1.28032	7.60816	14.2525	0.000159847	0.00576096	ENSMUSG00000018819	1.25117
ENSMUSG00000075012	0.279479	6.364	17.6883	2.60226e-05	0.000982334	ENSMUSG00000015377	-0.423749	6.41279	18.6681	1.55564e-05	0.000594623							ENSMUSG00000031885	0.411225	5.24549	12.5756	0.000390807	0.0140316	ENSMUSG00000025982	-0.348882	7.4332	19.5901	9.59669e-06	0.000322847	ENSMUSG00000027599	0.243915	5.73453	15.12	0.000100888	0.00347233	ENSMUSG00000034771	0.526194	4.32676	18.1079	2.08738e-05	0.000741946	ENSMUSG00000029528	-0.213437	7.70996	14.2221	0.000162448	0.00583894	ENSMUSG00000020257	-0.349832
ENSMUSG00000022797	0.365152	6.92192	17.6767	2.61814e-05	0.000985673	ENSMUSG00000061028	-0.355575	6.60983	18.6427	1.57648e-05	0.000600971							ENSMUSG00000073423	-0.456175	3.13386	12.5753	0.000390877	0.0140316	ENSMUSG00000017466	0.449059	7.18677	19.5544	9.77732e-06	0.000327479	ENSMUSG00000066621	-0.316083	6.02674	15.1071	0.000101581	0.00348681	ENSMUSG00000020108	-1.00419	5.01287	18.1026	2.09316e-05	0.000742004	ENSMUSG00000068686	-1.17473	1.1573	14.2062	0.000163833	0.00587288	ENSMUSG00000023169	1.03326
ENSMUSG00000071341	-0.857886	5.03727	17.6572	2.64513e-05	0.00099052	ENSMUSG00000021686	-0.241776	5.34284	18.6242	1.59187e-05	0.000604566							ENSMUSG00000029684	0.353506	6.9524	12.5488	0.000396469	0.0141592	ENSMUSG00000028599	0.671087	3.45872	19.5526	9.78686e-06	0.000327479	ENSMUSG00000029767	0.200922	8.50943	15.0791	0.0001031	0.00351621	ENSMUSG00000038507	0.410206	4.19133	18.0615	2.13886e-05	0.000756172	ENSMUSG00000000028	1.01173	1.32984	14.1845	0.000165726	0.00591065	ENSMUSG00000053317	-0.418928
ENSMUSG00000028945	0.189593	6.65412	17.6572	2.64516e-05	0.00099052	ENSMUSG00000021598	-0.326452	4.40943	18.6211	1.59444e-05	0.000604566							ENSMUSG00000028743	-0.511176	6.61333	12.5448	0.000397301	0.0141592	ENSMUSG00000023235	-0.689879	2.18209	19.5302	9.90229e-06	0.000330456	ENSMUSG00000057469	0.251069	6.72247	15.0767	0.000103228	0.00351621	ENSMUSG00000019877	-0.312391	7.91048	18.013	2.194e-05	0.000773591	ENSMUSG00000020652	-0.481335	2.67865	14.184	0.000165773	0.00591065	ENSMUSG00000041229	-0.408631
ENSMUSG00000048109	-0.474881	4.4544	17.6502	2.65489e-05	0.000991514	ENSMUSG00000098488	-1.06671	0.650509	18.6153	1.59933e-05	0.000604802							ENSMUSG00000052144	0.360917	5.6373	12.5394	0.000398464	0.0141592	ENSMUSG00000024228	-0.39196	4.34393	19.5057	1.003e-05	0.000333227	ENSMUSG00000021482	0.295463	5.53274	15.0761	0.000103264	0.00351621	ENSMUSG00000019864	-0.365872	6.02326	17.9996	2.20948e-05	0.000776971	ENSMUSG00000027340	-0.291169	5.07237	14.1671	0.000167266	0.00594798	ENSMUSG00000037416	-0.399189
ENSMUSG00000031633	0.151568	9.11416	17.603	2.72159e-05	0.00101372	ENSMUSG00000067369	0.65386	4.14351	18.6056	1.60751e-05	0.000606281							ENSMUSG00000068798	0.485073	6.29176	12.5384	0.00039867	0.0141592	ENSMUSG00000037325	-0.712743	2.99289	19.5012	1.00539e-05	0.000333227	ENSMUSG00000016308	0.22665	5.23683	15.0463	0.000104905	0.00356259	ENSMUSG00000034903	-0.431774	7.69703	17.983	2.22889e-05	0.000781712	ENSMUSG00000062785	-0.484787	5.41851	14.157	0.000168173	0.00595592	ENSMUSG00000038582	-0.894008
ENSMUSG00000054716	0.22282	5.19541	17.5893	2.7413e-05	0.00101835	ENSMUSG00000001062	-0.282142	6.11772	18.5945	1.61687e-05	0.000608191							ENSMUSG00000005501	-0.355399	5.59184	12.5098	0.000404814	0.0143392	ENSMUSG00000031438	-0.354829	6.76903	19.499	1.00654e-05	0.000333227	ENSMUSG00000028797	0.27177	6.01016	15.0154	0.000106637	0.00361181	ENSMUSG00000048216	1.43124	0.959807	17.9657	2.24923e-05	0.000786755	ENSMUSG00000021701	0.499533	3.95616	14.1546	0.000168383	0.00595592	ENSMUSG00000040964	0.533568
ENSMUSG00000072082	-0.516899	2.5968	17.5137	2.85246e-05	0.00105685	ENSMUSG00000029998	0.193381	6.99395	18.5571	1.64892e-05	0.000618609							ENSMUSG00000056941	-0.296136	5.31582	12.4969	0.000407633	0.0143767	ENSMUSG00000021411	-0.393449	3.61156	19.4733	1.02014e-05	0.000336837	ENSMUSG00000020549	-0.227451	4.91957	15.001	0.000107453	0.00362981	ENSMUSG00000026062	0.423471	5.66069	17.9605	2.25532e-05	0.000786797	ENSMUSG00000048232	-0.36699	5.53002	14.1354	0.000170113	0.00597964	ENSMUSG00000069094	-0.670834
ENSMUSG00000027318	0.856443	2.54068	17.5053	2.86509e-05	0.00105872	ENSMUSG00000027936	-0.341901	5.30154	18.552	1.65331e-05	0.000618616							ENSMUSG00000091680	-1.29405	1.44425	12.4876	0.000409656	0.0143767	ENSMUSG00000025907	-0.359759	6.21217	19.4399	1.03813e-05	0.000340431	ENSMUSG00000017969	-0.563327	4.42617	14.991	0.000108028	0.0036353	ENSMUSG00000030031	-0.673913	1.68011	17.9503	2.26743e-05	0.000788934	ENSMUSG00000048572	0.746659	5.59097	14.1347	0.000170179	0.00597964	ENSMUSG00000017707	-0.402498
ENSMUSG00000093803	0.238515	5.72041	17.4596	2.93474e-05	0.0010816	ENSMUSG00000026229	0.151906	6.78359	18.5366	1.66677e-05	0.000622013							ENSMUSG00000086040	-0.441317	5.53128	12.4841	0.00041043	0.0143767	ENSMUSG00000046794	-0.558915	5.12785	19.4399	1.03818e-05	0.000340431	ENSMUSG00000030536	-0.344252	6.34164	14.9882	0.000108185	0.0036353	ENSMUSG00000019997	-0.857228	6.32632	17.907	2.31961e-05	0.000804965	ENSMUSG00000029552	-0.570192	4.46271	14.1322	0.000170398	0.00597964	ENSMUSG00000043019	-0.395066
ENSMUSG00000015882	-0.331326	4.26084	17.4318	2.97794e-05	0.00109465	ENSMUSG00000021215	0.383987	4.9045	18.5208	1.68063e-05	0.00062554							ENSMUSG00000020634	0.483762	6.97565	12.4808	0.000411162	0.0143767	ENSMUSG00000028125	-2.16979	4.38525	19.4359	1.04035e-05	0.000340431	ENSMUSG00000029128	0.182672	6.4387	14.9799	0.000108662	0.00364176	ENSMUSG00000031994	-1.33626	0.704435	17.8728	2.36179e-05	0.00081745	ENSMUSG00000029076	0.184624	7.26487	14.1258	0.000170982	0.00598176	ENSMUSG00000066232	-0.401492
ENSMUSG00000070003	0.215176	7.38173	17.4016	3.02575e-05	0.00110931	ENSMUSG00000104063	-0.64445	3.48737	18.5078	1.69214e-05	0.000626849							ENSMUSG00000032872	0.3305	5.89724	12.4804	0.000411254	0.0143767	ENSMUSG00000030431	0.730258	1.87792	19.4329	1.04194e-05	0.000340431	ENSMUSG00000004364	0.239022	7.21929	14.9742	0.000108993	0.00364329	ENSMUSG00000020777	-0.437007	10.3895	17.8673	2.36855e-05	0.000817647	ENSMUSG00000043962	-0.213899	6.95754	14.1217	0.000171356	0.00598176	ENSMUSG00000032350	0.841025
ENSMUSG00000079363	1.3072	0.781099	17.3641	3.08598e-05	0.00112844	ENSMUSG00000010607	-0.283319	3.95493	18.5068	1.69299e-05	0.000626849							ENSMUSG00000037999	0.399776	5.67152	12.4579	0.000416223	0.0145124	ENSMUSG00000023809	0.568624	5.69802	19.3723	1.07555e-05	0.000350496	ENSMUSG00000059534	0.26094	8.04628	14.9349	0.000111283	0.0037101	ENSMUSG00000000579	1.08013	0.731935	17.8281	2.41786e-05	0.000832489	ENSMUSG00000024841	0.2433	4.73081	14.1104	0.000172385	0.00600198	ENSMUSG00000024120	-0.417739
ENSMUSG00000012848	0.191241	6.74642	17.3484	3.11154e-05	0.00113482	ENSMUSG00000026617	0.231425	5.92537	18.4815	1.71561e-05	0.000633568							ENSMUSG00000024797	-0.351057	5.14339	12.4453	0.000419041	0.0145418	ENSMUSG00000051149	0.827571	2.44775	19.3493	1.0886e-05	0.000353574	ENSMUSG00000023066	0.63906	3.18529	14.9201	0.00011216	0.00372961	ENSMUSG00000037890	0.471177	4.22842	17.8011	2.45238e-05	0.000842174	ENSMUSG00000021754	-0.245551	5.87368	14.1032	0.000173053	0.00600952	ENSMUSG00000042246	-2.15877
ENSMUSG00000028967	-0.387072	5.12907	17.3373	3.12979e-05	0.00113851	ENSMUSG00000069806	-0.194152	7.8995	18.4201	1.77178e-05	0.000652614							ENSMUSG00000071660	0.377017	5.3735	12.4444	0.000419245	0.0145418	ENSMUSG00000018547	0.291984	5.61088	19.3457	1.09066e-05	0.000353574	ENSMUSG00000063894	0.319215	4.42606	14.9054	0.000113036	0.00374899	ENSMUSG00000025026	-0.344365	7.22161	17.7554	2.512e-05	0.000860408	ENSMUSG00000005142	-0.325166	7.78277	14.093	0.000173991	0.00602642	ENSMUSG00000079036	-0.500414
ENSMUSG00000042608	-0.274562	5.42288	17.2798	3.22592e-05	0.00117044	ENSMUSG00000096433	0.554792	2.76473	18.3816	1.80799e-05	0.000664224							ENSMUSG00000025958	0.444018	5.49817	12.4334	0.000421721	0.0145898	ENSMUSG00000024383	-0.452343	4.34938	19.3374	1.09542e-05	0.000354195	ENSMUSG00000020814	-0.420265	4.30937	14.7323	0.000123906	0.00409885	ENSMUSG00000020062	-0.536312	8.4206	17.7214	2.55728e-05	0.000873648	ENSMUSG00000039783	-0.440794	6.91876	14.004	0.000182423	0.00630209	ENSMUSG00000030870	-0.403532
ENSMUSG00000024042	-0.732693	4.69996	17.2407	3.29299e-05	0.00119169	ENSMUSG00000052373	-0.418781	6.7187	18.3277	1.85983e-05	0.000681369							ENSMUSG00000022358	0.73237	4.93165	12.4266	0.000423273	0.0146056	ENSMUSG00000019877	-0.275441	8.12511	19.3247	1.10268e-05	0.000355543	ENSMUSG00000070808	-0.311534	4.88126	14.7264	0.000124296	0.00410113	ENSMUSG00000079495	-1.70607	3.42246	17.6851	2.60661e-05	0.000888202	ENSMUSG00000057074	-2.22978	1.85404	13.989	0.000183881	0.00632094	ENSMUSG00000022474	2.16802
ENSMUSG00000031497	-0.72889	1.92007	17.1942	3.37465e-05	0.00121809	ENSMUSG00000062661	0.158948	8.57469	18.3221	1.86526e-05	0.000681369							ENSMUSG00000032548	-0.335227	7.14802	12.4171	0.000425427	0.0146421	ENSMUSG00000022707	-0.312582	6.30359	19.3202	1.10528e-05	0.000355543	ENSMUSG00000052160	-1.06022	3.88345	14.7149	0.000125052	0.00411545	ENSMUSG00000015405	-0.46681	6.5146	17.6751	2.62039e-05	0.000890597	ENSMUSG00000027435	0.422174	4.87985	13.9876	0.000184016	0.00632094	ENSMUSG00000022892	0.615993
ENSMUSG00000005447	0.401858	3.74289	17.1306	3.48951e-05	0.00125631	ENSMUSG00000026207	-0.185102	7.5967	18.3143	1.87292e-05	0.000681369							ENSMUSG00000033902	-0.883055	5.16738	12.3854	0.000432709	0.0148418	ENSMUSG00000078651	-0.860934	1.84975	19.3003	1.11688e-05	0.000358349	ENSMUSG00000028013	0.272164	6.46509	14.7002	0.000126035	0.00413712	ENSMUSG00000052889	1.05603	0.824278	17.65	2.65515e-05	0.000896574	ENSMUSG00000005547	-1.22396	6.55426	13.9838	0.00018439	0.00632094	ENSMUSG00000019726	-0.41561
ENSMUSG00000039795	0.493083	4.58873	17.0623	3.61724e-05	0.00129828	ENSMUSG00000034863	-0.18486	6.77578	18.3134	1.87387e-05	0.000681369							ENSMUSG00000028986	0.533933	3.34214	12.3774	0.000434568	0.0148418	ENSMUSG00000102918	0.498763	3.79119	19.2894	1.12328e-05	0.000359477	ENSMUSG00000020527	-0.512567	3.82256	14.6737	0.000127816	0.00418482	ENSMUSG00000003190	0.529936	2.66755	17.65	2.65519e-05	0.000896574	ENSMUSG00000027613	0.281657	5.77159	13.9497	0.000187765	0.00640158	ENSMUSG00000001670	-1.29781
ENSMUSG00000036452	-0.201988	7.3273	17.0585	3.62461e-05	0.00129828	ENSMUSG00000004561	-0.335646	4.85446	18.2825	1.90453e-05	0.00068826							ENSMUSG00000039968	0.487047	4.70163	12.3722	0.00043578	0.0148418	ENSMUSG00000024843	-0.538102	3.5895	19.2272	1.16046e-05	0.000369437	ENSMUSG00000073436	0.590278	2.65221	14.667	0.00012827	0.00418896	ENSMUSG00000036322	1.13194	4.79186	17.644	2.66352e-05	0.000896574	ENSMUSG00000017146	1.37437	0.625576	13.9489	0.00018785	0.00640158	ENSMUSG00000032078	-0.625094
ENSMUSG00000060284	1.15875	1.68148	17.0441	3.65223e-05	0.00130483	ENSMUSG00000056167	-0.19492	6.16606	18.282	1.90503e-05	0.00068826							ENSMUSG00000030337	-0.445481	4.33277	12.3694	0.000436425	0.0148418	ENSMUSG00000038174	-0.57761	3.70566	19.2254	1.16158e-05	0.000369437	ENSMUSG00000030638	-0.919716	0.250062	14.6595	0.000128781	0.00419492	ENSMUSG00000017747	0.356805	5.7283	17.6428	2.66518e-05	0.000896574	ENSMUSG00000028496	-0.456764	3.79252	13.9455	0.000188183	0.00640158	ENSMUSG00000058571	-1.41235
ENSMUSG00000003847	-0.263645	6.85876	17.0337	3.67214e-05	0.00130861	ENSMUSG00000024948	-0.322995	6.71227	18.2796	1.90738e-05	0.00068826							ENSMUSG00000072946	-0.522759	5.62353	12.3679	0.000436784	0.0148418	ENSMUSG00000027660	-0.3502	4.79636	19.2226	1.16328e-05	0.000369437	ENSMUSG00000057649	0.232492	5.17578	14.6477	0.000129593	0.00420202	ENSMUSG00000046157	0.618229	2.18807	17.6214	2.69543e-05	0.000902073	ENSMUSG00000028538	0.340773	5.78302	13.9359	0.000189148	0.00640312	ENSMUSG00000096740	-0.638384
ENSMUSG00000021097	-0.24302	7.10826	17.0109	3.71657e-05	0.00132108	ENSMUSG00000041920	-0.287569	4.19764	18.2651	1.92192e-05	0.000691745							ENSMUSG00000032812	-0.355716	6.04905	12.3564	0.000439468	0.0148951	ENSMUSG00000001761	0.389219	4.36864	19.1353	1.21771e-05	0.00038533	ENSMUSG00000028465	-0.284526	7.87615	14.6468	0.000129657	0.00420202	ENSMUSG00000034157	-0.286872	5.74906	17.6172	2.70135e-05	0.000902073	ENSMUSG00000037791	-0.22457	5.81452	13.9355	0.000189189	0.00640312	ENSMUSG00000007836	0.463984
ENSMUSG00000039057	0.391272	5.60198	16.9906	3.75658e-05	0.00133192	ENSMUSG00000055065	-0.20372	9.22247	18.2516	1.93565e-05	0.000694922							ENSMUSG00000015342	0.64669	5.50805	12.3381	0.000443811	0.0149908	ENSMUSG00000004815	-0.408776	3.47458	19.1325	1.2195e-05	0.00038533	ENSMUSG00000026837	-0.454302	6.62408	14.6312	0.000130734	0.00422618	ENSMUSG00000020674	0.664554	5.79465	17.6167	2.70205e-05	0.000902073	ENSMUSG00000050953	0.596396	3.52218	13.891	0.000193728	0.00653891	ENSMUSG00000041845	0.787982
ENSMUSG00000017561	-0.506495	3.71694	16.9651	3.80734e-05	0.00134651	ENSMUSG00000045114	-0.664123	1.16795	18.1735	2.01663e-05	0.000722168							ENSMUSG00000041130	-0.308058	6.97043	12.335	0.000444539	0.0149908	ENSMUSG00000026775	-0.288546	6.38496	19.1074	1.23567e-05	0.000389325	ENSMUSG00000079429	-1.09475	1.22253	14.6133	0.000131983	0.00425578	ENSMUSG00000052738	-0.311575	8.51454	17.6038	2.72039e-05	0.000905905	ENSMUSG00000004263	-0.339379	3.63221	13.8866	0.000194181	0.00653891	ENSMUSG00000038642	0.882762
ENSMUSG00000009470	-0.258722	6.45588	16.946	3.84588e-05	0.00135661	ENSMUSG00000038777	-0.308976	5.43644	18.1641	2.02668e-05	0.000723939							ENSMUSG00000027750	0.736246	5.2324	12.3105	0.000450423	0.015151	ENSMUSG00000055150	0.923331	1.27225	19.1032	1.23838e-05	0.000389325	ENSMUSG00000063524	0.381302	6.51816	14.6077	0.000132375	0.00425769	ENSMUSG00000098112	1.08727	0.95815	17.5809	2.75336e-05	0.000914572	ENSMUSG00000042363	0.562398	4.58104	13.8808	0.000194779	0.0065425	ENSMUSG00000079293	1.21255
ENSMUSG00000026810	0.271826	4.9878	16.9413	3.85526e-05	0.00135661	ENSMUSG00000018481	0.170455	6.97039	18.1367	2.05604e-05	0.000732581							ENSMUSG00000032475	0.416745	4.36513	12.2893	0.000455565	0.0152432	ENSMUSG00000025132	0.263354	7.40068	19.0895	1.24731e-05	0.000390252	ENSMUSG00000053119	0.218695	5.9712	14.6019	0.00013278	0.00425996	ENSMUSG00000035697	0.642471	3.41884	17.5172	2.84721e-05	0.000940566	ENSMUSG00000025269	-0.422936	3.2541	13.8439	0.000198637	0.00665532	ENSMUSG00000057346	1.47991
ENSMUSG00000069171	0.294899	6.45308	16.9196	3.89974e-05	0.00136882	ENSMUSG00000078784	0.443012	3.47361	18.118	2.07628e-05	0.000737938							ENSMUSG00000022747	0.964834	5.64851	12.2868	0.000456173	0.0152432	ENSMUSG00000020863	-0.41151	5.98862	19.0891	1.24758e-05	0.000390252	ENSMUSG00000024940	-0.272629	6.29454	14.5845	0.000134013	0.00428874	ENSMUSG00000021613	-2.03275	1.86656	17.514	2.85201e-05	0.000940566	ENSMUSG00000031974	0.315663	5.46834	13.8384	0.000199221	0.00665818	ENSMUSG00000057156	0.662168
ENSMUSG00000041341	-0.224137	6.17972	16.8267	4.09541e-05	0.00143176	ENSMUSG00000025911	0.472476	3.41849	18.1067	2.08862e-05	0.00074013							ENSMUSG00000028394	-0.426395	5.08962	12.2851	0.000456588	0.0152432	ENSMUSG00000030335	-0.300291	7.06789	19.0459	1.27608e-05	0.00039817	ENSMUSG00000027204	-0.593592	6.66447	14.5677	0.000135211	0.00431627	ENSMUSG00000040710	1.03868	1.08704	17.5133	2.85301e-05	0.000940566	ENSMUSG00000021519	-0.294179	4.60683	13.8159	0.000201626	0.00672171	ENSMUSG00000005774	0.751231
ENSMUSG00000060477	-0.582918	3.91776	16.8248	4.0995e-05	0.00143176	ENSMUSG00000041889	0.229601	6.83784	18.0999	2.09608e-05	0.00074013							ENSMUSG00000089862	0.62539	4.05682	12.2799	0.000457855	0.0152474	ENSMUSG00000055413	2.13649	1.27545	19.0282	1.28804e-05	0.000400899	ENSMUSG00000020695	-0.370253	5.12709	14.5625	0.000135585	0.00431743	ENSMUSG00000034343	-0.301167	5.05688	17.4843	2.89695e-05	0.000952669	ENSMUSG00000032375	0.361396	4.03874	13.7929	0.000204105	0.0067874	ENSMUSG00000026864	-0.418049
ENSMUSG00000060862	-0.461736	4.12455	16.7836	4.18944e-05	0.00145953	ENSMUSG00000048997	-0.360408	4.97245	18.0981	2.0981e-05	0.00074013							ENSMUSG00000001175	0.425764	10.9279	12.2484	0.000465654	0.0154685	ENSMUSG00000026761	-0.391068	4.44707	19.0146	1.29723e-05	0.000402754	ENSMUSG00000078784	0.547482	3.49126	14.5505	0.00013645	0.00433415	ENSMUSG00000023805	-0.900098	2.41011	17.4718	2.91604e-05	0.000955515	ENSMUSG00000019810	0.455883	9.1306	13.7835	0.00020513	0.0068045	ENSMUSG00000026617	-0.363754
ENSMUSG00000028608	0.401913	4.8702	16.7783	4.20118e-05	0.00145999	ENSMUSG00000060450	0.163852	8.27574	18.0769	2.1216e-05	0.000746562							ENSMUSG00000027598	0.410114	7.40457	12.225	0.000471526	0.0156247	ENSMUSG00000006717	-0.345833	7.22552	18.9859	1.31689e-05	0.000407843	ENSMUSG00000042363	0.427474	5.49221	14.5204	0.00013865	0.00438574	ENSMUSG00000028522	-0.295761	5.71092	17.4691	2.92009e-05	0.000955515	ENSMUSG00000112160	-1.06776	0.515713	13.7738	0.000206192	0.00681702	ENSMUSG00000055401	0.649885
ENSMUSG00000032525	-0.282173	6.92227	16.7646	4.23152e-05	0.00146479	ENSMUSG00000038255	-0.221956	6.61847	18.0607	2.13972e-05	0.000751074							ENSMUSG00000032712	0.608861	5.94827	12.2033	0.000477056	0.0157688	ENSMUSG00000049744	1.23787	0.414803	18.9793	1.32143e-05	0.000408235	ENSMUSG00000021185	0.702995	6.07363	14.5189	0.000138761	0.00438574	ENSMUSG00000023243	-0.831246	7.78498	17.4557	2.94085e-05	0.000959925	ENSMUSG00000075394	-0.676869	2.28543	13.77	0.000206607	0.00681702	ENSMUSG00000029003	0.84069
ENSMUSG00000092035	-0.239133	6.12419	16.7626	4.23593e-05	0.00146479	ENSMUSG00000045967	0.189736	7.43404	18.0326	2.1715e-05	0.000760345							ENSMUSG00000025745	-0.449806	8.65778	12.1542	0.000489782	0.0161495	ENSMUSG00000004462	0.746426	4.08866	18.9441	1.34608e-05	0.000414825	ENSMUSG00000043424	0.386907	3.70001	14.5055	0.000139754	0.00440623	ENSMUSG00000037321	0.80577	3.46088	17.403	3.02345e-05	0.000984449	ENSMUSG00000057060	-0.521443	5.19423	13.7618	0.000207518	0.00681702	ENSMUSG00000035498	1.88679
ENSMUSG00000033671	-0.389555	6.12462	16.7558	4.25122e-05	0.00146646	ENSMUSG00000032295	-0.27233	6.31959	17.9878	2.22324e-05	0.000776544							ENSMUSG00000031176	0.468837	5.00765	12.142	0.000492993	0.0162126	ENSMUSG00000024026	0.740565	6.89028	18.8855	1.38804e-05	0.000426137	ENSMUSG00000019978	-0.275533	5.83494	14.4882	0.000141042	0.00443587	ENSMUSG00000033701	0.30352	5.08417	17.3823	3.05662e-05	0.0009928	ENSMUSG00000031886	0.813835	3.36381	13.7614	0.000207552	0.00681702	ENSMUSG00000030652	-0.469431
ENSMUSG00000035890	0.200469	6.26458	16.7487	4.26705e-05	0.00146831	ENSMUSG00000021302	0.271223	5.53344	17.9813	2.23083e-05	0.000777154							ENSMUSG00000040867	-0.8225	0.758303	12.1377	0.000494123	0.0162126	ENSMUSG00000051067	0.666635	4.97144	18.8794	1.3925e-05	0.000426137	ENSMUSG00000058624	-0.506803	4.74901	14.476	0.000141956	0.00444238	ENSMUSG00000031725	-0.668102	9.58385	17.3707	3.0753e-05	0.000996414	ENSMUSG00000029073	0.275061	5.28571	13.7253	0.000211584	0.00693237	ENSMUSG00000030123	0.456517
ENSMUSG00000040865	-0.315265	5.6803	16.6983	4.38195e-05	0.00150415	ENSMUSG00000029413	-0.2597	4.93731	17.977	2.23594e-05	0.000777154							ENSMUSG00000042510	0.855597	6.80745	12.1238	0.000497825	0.0162693	ENSMUSG00000048583	1.067	1.96683	18.8787	1.39303e-05	0.000426137	ENSMUSG00000042589	0.391543	4.81275	14.4759	0.000141964	0.00444238	ENSMUSG00000046314	-0.338949	4.75903	17.3572	3.0973e-05	0.00100108	ENSMUSG00000027646	-0.254417	5.97238	13.7026	0.000214152	0.006988	ENSMUSG00000079012	-0.734928
ENSMUSG00000009216	0.31063	7.01257	16.6861	4.41033e-05	0.00151017	ENSMUSG00000037720	0.226773	6.52935	17.9537	2.26342e-05	0.000784781							ENSMUSG00000000078	0.489348	7.6531	12.1202	0.00049879	0.0162693	ENSMUSG00000031217	0.361228	4.9584	18.8508	1.41353e-05	0.000431351	ENSMUSG00000020366	0.164825	5.95133	14.4715	0.000142293	0.00444238	ENSMUSG00000038520	0.314788	5.81548	17.3451	3.11709e-05	0.00100501	ENSMUSG00000039047	-0.473659	6.0677	13.7011	0.00021433	0.006988	ENSMUSG00000048779	-1.65574
ENSMUSG00000005973	0.38985	5.13942	16.6815	4.42106e-05	0.00151017	ENSMUSG00000035486	-0.514966	5.34072	17.9252	2.29759e-05	0.000794687							ENSMUSG00000050395	1.59949	2.14007	12.1171	0.000499623	0.0162693	ENSMUSG00000057541	-0.478894	3.91161	18.7833	1.46445e-05	0.000445801	ENSMUSG00000024104	-0.333784	4.94832	14.459	0.000143247	0.00446126	ENSMUSG00000070280	-2.18134	2.51625	17.3388	3.12738e-05	0.00100587	ENSMUSG00000070337	1.40446	0.748564	13.6865	0.000216007	0.00702549	ENSMUSG00000031534	0.409379
ENSMUSG00000020387	-0.226775	6.58132	16.6628	4.46482e-05	0.00152082	ENSMUSG00000028150	-1.18838	2.29845	17.9184	2.3058e-05	0.000795585							ENSMUSG00000057530	-0.434626	7.29721	12.113	0.000500726	0.0162693	ENSMUSG00000030838	-1.77328	5.02832	18.7759	1.47011e-05	0.00044625	ENSMUSG00000056413	-0.974824	1.85957	14.4058	0.000147348	0.00456791	ENSMUSG00000031983	0.470477	6.08609	17.3158	3.16536e-05	0.00101561	ENSMUSG00000028712	1.01346	7.74954	13.6796	0.000216792	0.00703059	ENSMUSG00000024887	-0.399089
ENSMUSG00000044258	-1.01301	0.793527	16.6589	4.47396e-05	0.00152082	ENSMUSG00000036896	0.639675	3.87792	17.8957	2.33344e-05	0.000803167							ENSMUSG00000034021	0.426517	4.45439	12.1044	0.000503029	0.0163045	ENSMUSG00000038102	0.300829	5.17222	18.7721	1.47308e-05	0.00044625	ENSMUSG00000027667	0.284573	4.56243	14.4053	0.000147387	0.00456791	ENSMUSG00000079560	0.521425	3.21497	17.2964	3.19794e-05	0.00102357	ENSMUSG00000079429	-0.92765	2.04309	13.6755	0.000217272	0.00703059	ENSMUSG00000038007	-0.737297
ENSMUSG00000023017	-0.251938	6.88195	16.6433	4.51089e-05	0.00152966	ENSMUSG00000051451	-0.214841	6.73293	17.8655	2.3708e-05	0.000813375							ENSMUSG00000039661	1.2068	1.20837	12.0925	0.000506245	0.0163319	ENSMUSG00000056962	-0.53262	4.98314	18.7663	1.47755e-05	0.00044652	ENSMUSG00000066735	0.238827	4.76828	14.4002	0.000147783	0.00456911	ENSMUSG00000019478	0.383613	4.77596	17.2684	3.24534e-05	0.00103586	ENSMUSG00000032548	0.408415	5.33568	13.6714	0.000217745	0.00703059	ENSMUSG00000029804	0.486474
ENSMUSG00000068284	-0.319972	6.21597	16.6352	4.53023e-05	0.00153056	ENSMUSG00000033326	-0.212077	6.26808	17.8625	2.37457e-05	0.000813375							ENSMUSG00000028546	0.966271	1.67993	12.0922	0.00050632	0.0163319	ENSMUSG00000024780	-0.378391	7.09066	18.7032	1.52726e-05	0.000459926	ENSMUSG00000041153	0.459327	3.42859	14.3943	0.00014825	0.00457037	ENSMUSG00000017418	-0.495748	4.4945	17.2645	3.25204e-05	0.00103586	ENSMUSG00000053192	0.425616	3.62587	13.6432	0.000221039	0.0071197	ENSMUSG00000017176	0.581564
ENSMUSG00000046230	-0.460805	6.10641	16.6291	4.54479e-05	0.00153056	ENSMUSG00000041298	-0.186329	6.69016	17.8488	2.39165e-05	0.000817253							ENSMUSG00000047648	0.528358	4.33063	12.0652	0.000513705	0.0164911	ENSMUSG00000029390	0.478392	5.67248	18.7007	1.52928e-05	0.000459926	ENSMUSG00000053347	0.520062	4.07016	14.3906	0.00014854	0.00457037	ENSMUSG00000031750	0.9655	3.49912	17.2587	3.26198e-05	0.00103652	ENSMUSG00000029003	0.4439	3.55305	13.6214	0.000223619	0.00718545	ENSMUSG00000025498	0.92308
ENSMUSG00000045160	0.296851	4.21552	16.6285	4.54633e-05	0.00153056	ENSMUSG00000010608	-0.262766	7.03803	17.7996	2.45438e-05	0.000836671							ENSMUSG00000033857	-0.799457	4.93423	12.0652	0.000513726	0.0164911	ENSMUSG00000071267	-0.523646	3.11009	18.6707	1.55349e-05	0.000466085	ENSMUSG00000070858	0.993725	0.530669	14.3695	0.000150216	0.00459253	ENSMUSG00000059173	0.451375	6.08838	17.2299	3.3119e-05	0.00104986	ENSMUSG00000037254	1.33318	4.18208	13.6086	0.000225146	0.00721711	ENSMUSG00000021939	0.335666
ENSMUSG00000028710	0.255873	5.60347	16.6008	4.61323e-05	0.00154936	ENSMUSG00000029265	0.229307	5.46013	17.7607	2.50509e-05	0.00085191							ENSMUSG00000040121	0.66816	5.06542	12.0559	0.000516278	0.0165333	ENSMUSG00000021832	-0.301573	6.59766	18.6555	1.56597e-05	0.000468702	ENSMUSG00000020654	-0.529521	2.55286	14.3688	0.000150274	0.00459253	ENSMUSG00000029260	1.44888	3.64489	17.2226	3.3246e-05	0.00105093	ENSMUSG00000045034	-1.13244	1.8389	13.5897	0.00022743	0.00727284	ENSMUSG00000117621	-1.49734
ENSMUSG00000025792	0.348156	4.1725	16.5921	4.63426e-05	0.0015527	ENSMUSG00000031639	1.16629	2.61078	17.7511	2.51771e-05	0.000854155							ENSMUSG00000039983	-0.392907	4.34191	12.0486	0.000518312	0.0165587	ENSMUSG00000031734	0.640229	5.35835	18.6217	1.59393e-05	0.000474857	ENSMUSG00000019528	0.268243	7.21306	14.3652	0.000150557	0.00459253	ENSMUSG00000031828	0.359579	4.59499	17.2143	3.33916e-05	0.00105093	ENSMUSG00000021477	-0.281033	8.41753	13.5741	0.000229329	0.00730254	ENSMUSG00000027845	-0.761313
ENSMUSG00000026839	0.864442	3.13134	16.5693	4.69035e-05	0.00156774	ENSMUSG00000024055	-0.39837	3.84036	17.7453	2.52544e-05	0.000854362							ENSMUSG00000022742	-0.799033	6.02817	12.0307	0.000523313	0.0166786	ENSMUSG00000032827	-0.326501	5.1121	18.6215	1.59415e-05	0.000474857	ENSMUSG00000024248	0.214011	6.86095	14.3608	0.000150914	0.00459253	ENSMUSG00000036764	-0.56085	7.84745	17.2143	3.33921e-05	0.00105093	ENSMUSG00000023186	0.375638	5.22539	13.5731	0.000229454	0.00730254	ENSMUSG00000024780	-0.398302
ENSMUSG00000072640	0.253879	5.79764	16.536	4.77342e-05	0.00159171	ENSMUSG00000024083	0.179152	9.22346	17.7416	2.53037e-05	0.000854362							ENSMUSG00000058835	0.318584	6.89059	12.0015	0.000531578	0.0169017	ENSMUSG00000028973	0.380604	6.54206	18.6124	1.60174e-05	0.000475983	ENSMUSG00000017843	0.175734	7.30838	14.359	0.000151058	0.00459253	ENSMUSG00000028689	0.65817	2.88862	17.205	3.3555e-05	0.00105355	ENSMUSG00000025076	0.703881	3.64038	13.5405	0.000233476	0.00741286	ENSMUSG00000053094	-0.346122
ENSMUSG00000025958	-0.259298	5.78523	16.5225	4.80766e-05	0.00159932	ENSMUSG00000070427	-0.590762	2.42148	17.7062	2.57779e-05	0.000868304							ENSMUSG00000041997	0.332459	6.29794	11.9803	0.000537646	0.0170433	ENSMUSG00000056666	-0.826281	5.19945	18.5842	1.62567e-05	0.000481946	ENSMUSG00000026189	0.39918	3.39067	14.3409	0.000152513	0.00462575	ENSMUSG00000025892	1.18421	0.763339	17.1833	3.39406e-05	0.00106312	ENSMUSG00000026414	1.45852	0.729253	13.5277	0.00023507	0.00744063	ENSMUSG00000032114	-0.690988
ENSMUSG00000031818	0.149857	8.51088	16.5085	4.84312e-05	0.0016073	ENSMUSG00000066406	-0.226387	5.61288	17.677	2.61776e-05	0.00087968							ENSMUSG00000042042	0.429573	3.31075	11.9771	0.000538585	0.0170433	ENSMUSG00000053063	1.76466	1.11826	18.5713	1.6367e-05	0.00048401	ENSMUSG00000075284	-0.315023	4.9806	14.3168	0.000154481	0.00467432	ENSMUSG00000044783	1.42298	4.63476	17.1701	3.41765e-05	0.00106798	ENSMUSG00000040752	1.48331	1.93839	13.5217	0.000235823	0.00744063	ENSMUSG00000026349	-0.417424
ENSMUSG00000045103	-0.261328	6.03941	16.4917	4.88635e-05	0.0016148	ENSMUSG00000022361	0.175016	5.92187	17.6725	2.62398e-05	0.000879684							ENSMUSG00000043487	-0.895508	2.29991	11.9563	0.000544631	0.0171939	ENSMUSG00000021537	-0.504648	4.56712	18.567	1.64038e-05	0.00048401	ENSMUSG00000031879	-0.333869	5.55978	14.2956	0.000156232	0.00471613	ENSMUSG00000021707	-0.240256	6.06133	17.1464	3.4607e-05	0.00107887	ENSMUSG00000042766	0.66419	2.58091	13.5201	0.000236025	0.00744063	ENSMUSG00000039046	0.539851
ENSMUSG00000029657	-0.288759	8.14003	16.4902	4.89018e-05	0.0016148	ENSMUSG00000045007	0.264067	5.51052	17.6633	2.63672e-05	0.00088187							ENSMUSG00000033953	0.335529	6.59433	11.9508	0.000546254	0.0172044	ENSMUSG00000025858	0.326293	5.31599	18.5472	1.65747e-05	0.000487898	ENSMUSG00000039239	-0.438961	4.12895	14.2798	0.000157548	0.00474368	ENSMUSG00000004032	-0.530784	6.99435	17.1389	3.47437e-05	0.00108058	ENSMUSG00000038102	-0.223567	6.09825	13.514	0.000236791	0.0074472	ENSMUSG00000057531	0.29394
ENSMUSG00000030257	-0.153688	8.6044	16.4854	4.90262e-05	0.0016148	ENSMUSG00000070639	0.227772	6.97031	17.626	2.68884e-05	0.000895755							ENSMUSG00000027274	0.593335	3.50299	11.9404	0.000549308	0.0172351	ENSMUSG00000061232	0.988895	6.9635	18.533	1.66985e-05	0.000490386	ENSMUSG00000040229	-0.904804	1.05058	14.2757	0.000157887	0.00474368	ENSMUSG00000053929	0.313281	5.53643	17.1048	3.53724e-05	0.00109732	ENSMUSG00000027601	0.374707	7.00942	13.5054	0.000237883	0.00745128	ENSMUSG00000028059	0.649696
ENSMUSG00000049076	-0.275774	6.83841	16.4818	4.91186e-05	0.0016148	ENSMUSG00000016756	2.41485	1.28182	17.6246	2.69087e-05	0.000895755							ENSMUSG00000033863	0.544986	5.71656	11.9387	0.00054981	0.0172351	ENSMUSG00000022894	0.434184	5.11534	18.4366	1.75651e-05	0.00051408	ENSMUSG00000037720	0.39939	5.29138	14.2385	0.000161041	0.00482706	ENSMUSG00000024521	-0.720995	3.95788	17.1007	3.54483e-05	0.00109732	ENSMUSG00000031938	-0.461204	9.88734	13.5041	0.000238039	0.00745128	ENSMUSG00000040413	0.603264
ENSMUSG00000019173	0.189996	7.04407	16.4401	5.02117e-05	0.00164687	ENSMUSG00000007603	-0.327618	6.7014	17.6118	2.70901e-05	0.000899682							ENSMUSG00000018574	-0.497991	7.06958	11.9296	0.000552479	0.0172426	ENSMUSG00000022180	0.900468	2.24229	18.4342	1.75877e-05	0.00051408	ENSMUSG00000044811	-1.17662	1.26544	14.213	0.000163241	0.00488154	ENSMUSG00000027678	-0.36486	6.97886	17.0721	3.59873e-05	0.00111139	ENSMUSG00000052488	-0.216884	5.75046	13.4885	0.000240036	0.00749011	ENSMUSG00000021196	0.922927
ENSMUSG00000019301	-1.43166	0.268094	16.4138	5.09142e-05	0.00166501	ENSMUSG00000029086	0.346768	4.20613	17.5837	2.74938e-05	0.000910957							ENSMUSG00000037795	0.460295	4.58695	11.9291	0.000552632	0.0172426	ENSMUSG00000030711	-0.723226	4.74455	18.4289	1.76359e-05	0.000514284	ENSMUSG00000027395	-0.296863	4.07649	14.2066	0.000163798	0.00488675	ENSMUSG00000021809	0.370704	4.14673	17.0541	3.63298e-05	0.00111935	ENSMUSG00000051034	0.573455	2.42797	13.4834	0.000240684	0.00749011	ENSMUSG00000026773	-2.27844
ENSMUSG00000054871	0.451236	6.0325	16.4105	5.10023e-05	0.00166501	ENSMUSG00000043843	-0.477775	6.68153	17.5644	2.77737e-05	0.000918085							ENSMUSG00000031367	0.754995	2.9805	11.9121	0.000557709	0.0173605	ENSMUSG00000017747	0.476706	3.78282	18.4199	1.77202e-05	0.000515537	ENSMUSG00000095115	-0.343945	5.89442	14.188	0.000165421	0.00490935	ENSMUSG00000023953	-0.618163	3.12893	17.0339	3.67176e-05	0.00112866	ENSMUSG00000031146	0.500656	3.72391	13.4812	0.000240964	0.00749011	ENSMUSG00000002111	0.872519
ENSMUSG00000031976	-0.42197	4.13545	16.3762	5.19343e-05	0.00169149	ENSMUSG00000040828	-1.05012	0.0269653	17.5409	2.81191e-05	0.000925424							ENSMUSG00000020023	0.403416	6.81115	11.8985	0.000561805	0.0174473	ENSMUSG00000039849	0.303821	5.49498	18.4098	1.78136e-05	0.000517049	ENSMUSG00000027673	0.274851	7.90829	14.1857	0.000165623	0.00490935	ENSMUSG00000039850	0.36923	4.35183	17.0222	3.69459e-05	0.00113304	ENSMUSG00000071719	-1.15299	1.77595	13.4589	0.000243852	0.00754599	ENSMUSG00000025089	-0.657904
ENSMUSG00000006134	-0.243789	6.13355	16.3538	5.25504e-05	0.00170758	ENSMUSG00000030313	0.260205	6.68254	17.5404	2.81262e-05	0.000925424							ENSMUSG00000040843	0.319493	5.06525	11.8915	0.000563901	0.0174718	ENSMUSG00000024436	-0.350648	4.02322	18.382	1.8076e-05	0.00052345	ENSMUSG00000074364	-0.26666	7.49946	14.1847	0.000165708	0.00490935	ENSMUSG00000056429	0.505933	8.23877	17.0128	3.71292e-05	0.00113602	ENSMUSG00000021496	-0.300175	4.49479	13.4585	0.000243894	0.00754599	ENSMUSG00000060216	0.436302
ENSMUSG00000073102	0.409993	3.70302	16.3467	5.2747e-05	0.00171	ENSMUSG00000090777	-0.689287	1.95865	17.5227	2.83891e-05	0.000929511							ENSMUSG00000075704	-0.531268	4.32353	11.8788	0.000567773	0.0174999	ENSMUSG00000060675	-0.374024	7.0776	18.3581	1.83042e-05	0.000528829	ENSMUSG00000019487	-0.302571	7.05355	14.1723	0.000166808	0.00491941	ENSMUSG00000022906	0.405765	4.03367	16.9972	3.74346e-05	0.00114271	ENSMUSG00000039954	0.708166	2.9167	13.448	0.000245262	0.00757075	ENSMUSG00000022488	0.775206
ENSMUSG00000048047	-0.270168	4.81788	16.3306	5.31981e-05	0.00172064	ENSMUSG00000040312	-0.735905	3.08686	17.5224	2.83941e-05	0.000929511							ENSMUSG00000067786	-0.493058	3.03533	11.8771	0.000568272	0.0174999	ENSMUSG00000004069	-0.261265	7.54076	18.3535	1.83485e-05	0.000528887	ENSMUSG00000042156	-0.574541	1.65398	14.171	0.000166927	0.00491941	ENSMUSG00000068039	-0.327805	7.10183	16.986	3.76571e-05	0.00114685	ENSMUSG00000036437	-0.662707	2.92738	13.44	0.000246317	0.00758143	ENSMUSG00000112129	-0.545476
ENSMUSG00000029064	0.228877	9.33776	16.279	5.46655e-05	0.00176403	ENSMUSG00000055805	-0.227672	6.80169	17.5189	2.84471e-05	0.000929511							ENSMUSG00000042599	0.510966	5.91396	11.8745	0.000569075	0.0174999	ENSMUSG00000029714	0.326782	6.3302	18.3372	1.85062e-05	0.000531003	ENSMUSG00000047592	-2.0533	0.927884	14.1678	0.000167204	0.00491941	ENSMUSG00000050373	0.367231	4.62697	16.9686	3.80028e-05	0.00115471	ENSMUSG00000035948	-0.715881	4.65452	13.4367	0.000246745	0.00758143	ENSMUSG00000038745	0.558037
ENSMUSG00000095041	-1.06407	6.99699	16.2594	5.52347e-05	0.0017783	ENSMUSG00000029767	0.158022	6.34355	17.4859	2.89447e-05	0.000943598							ENSMUSG00000027177	0.427063	6.16425	11.8713	0.00057005	0.0174999	ENSMUSG00000030264	-0.436206	3.69254	18.3371	1.8507e-05	0.000531003	ENSMUSG00000024076	-0.693707	2.11922	14.163	0.000167639	0.00492089	ENSMUSG00000003051	-0.62609	4.30535	16.924	3.89075e-05	0.00117707	ENSMUSG00000074829	0.412554	4.15516	13.4319	0.000247375	0.00758332	ENSMUSG00000068735	0.599239
ENSMUSG00000004032	-0.274724	6.4417	16.2526	5.54322e-05	0.00177933	ENSMUSG00000057110	-0.320506	4.45746	17.4691	2.92018e-05	0.000949794							ENSMUSG00000051043	-0.801552	1.98838	11.8235	0.000584863	0.0178884	ENSMUSG00000036913	-1.19891	2.16764	18.3258	1.86165e-05	0.000532917	ENSMUSG00000032199	0.1813	8.3761	14.1451	0.000169238	0.00495641	ENSMUSG00000040859	-0.39076	7.02933	16.9209	3.89697e-05	0.00117707	ENSMUSG00000020328	0.252627	4.48346	13.4179	0.00024924	0.00762298	ENSMUSG00000034931	-0.358914
ENSMUSG00000003119	-0.243906	5.27381	16.2496	5.55206e-05	0.00177933	ENSMUSG00000029571	0.208293	7.38661	17.4409	2.96381e-05	0.000961779							ENSMUSG00000020620	1.01082	1.88291	11.8219	0.000585386	0.0178884	ENSMUSG00000075702	0.347294	4.70235	18.2992	1.88782e-05	0.000539172	ENSMUSG00000028927	-1.17154	1.09589	14.135	0.000170147	0.00497164	ENSMUSG00000033068	0.339668	4.07918	16.9168	3.90546e-05	0.00117707	ENSMUSG00000032712	-0.59633	5.8201	13.4067	0.000250729	0.00763414	ENSMUSG00000038526	0.653162
ENSMUSG00000030711	-0.628617	2.63503	16.2311	5.60653e-05	0.00179268	ENSMUSG00000036208	-0.534953	3.11097	17.4303	2.9803e-05	0.000963829							ENSMUSG00000030364	0.786987	10.4348	11.8169	0.000586947	0.0178952	ENSMUSG00000089774	-1.03319	2.93866	18.2869	1.90011e-05	0.000541445	ENSMUSG00000020570	0.250483	6.51999	14.1105	0.00017238	0.00502538	ENSMUSG00000024241	-0.350935	5.84833	16.9148	3.90957e-05	0.00117707	ENSMUSG00000022801	-0.362242	3.89501	13.4065	0.00025075	0.00763414	ENSMUSG00000076431	0.810669
ENSMUSG00000019841	-0.334267	5.91833	16.2239	5.62807e-05	0.00179547	ENSMUSG00000030729	0.254115	8.47388	17.4282	2.98372e-05	0.000963829							ENSMUSG00000036499	0.452371	5.52523	11.7667	0.000602985	0.0183423	ENSMUSG00000022234	-0.248841	6.80149	18.282	1.90497e-05	0.000541594	ENSMUSG00000028488	-1.24435	1.15207	14.0988	0.000173457	0.00503699	ENSMUSG00000020186	-0.491122	7.05749	16.8862	3.96901e-05	0.00118873	ENSMUSG00000019863	-0.386952	3.78017	13.3972	0.000252001	0.00765475	ENSMUSG00000049792	-0.438366
ENSMUSG00000071637	-0.777578	2.39517	16.2082	5.67482e-05	0.00180627	ENSMUSG00000060703	0.545213	3.27358	17.4209	2.99513e-05	0.000964641							ENSMUSG00000019947	0.615924	5.13708	11.7452	0.000609996	0.0185134	ENSMUSG00000027463	1.41014	0.286208	18.2674	1.91962e-05	0.000544518	ENSMUSG00000078503	2.13763	0.410736	14.0974	0.000173587	0.00503699	ENSMUSG00000026278	0.404954	4.8416	16.8839	3.97369e-05	0.00118873	ENSMUSG00000062184	-0.788096	2.77784	13.386	0.000253504	0.00768289	ENSMUSG00000000552	0.729261
ENSMUSG00000059895	0.301863	5.75991	16.176	5.77223e-05	0.00183311	ENSMUSG00000020883	-0.161569	6.30509	17.4142	3.00578e-05	0.000964641							ENSMUSG00000058454	-0.318695	6.27068	11.7234	0.00061719	0.0186892	ENSMUSG00000032239	0.342564	4.97345	18.2548	1.93235e-05	0.00054671	ENSMUSG00000037938	0.39622	3.17568	14.0933	0.000173961	0.00503699	ENSMUSG00000070883	0.984744	1.61585	16.8831	3.97536e-05	0.00118873	ENSMUSG00000020900	-0.385662	7.15722	13.3721	0.000255396	0.00772268	ENSMUSG00000023913	1.09853
ENSMUSG00000103800	-2.80901	1.27244	16.164	5.80877e-05	0.00184054	ENSMUSG00000070923	0.25117	6.54986	17.4136	3.00664e-05	0.000964641							ENSMUSG00000022971	-0.578677	3.61199	11.7156	0.000619772	0.0186979	ENSMUSG00000102252	-0.461283	5.77994	18.2511	1.93611e-05	0.00054671	ENSMUSG00000015533	-1.37307	1.27929	14.0722	0.000175927	0.0050803	ENSMUSG00000038187	-0.418566	3.3597	16.8768	3.98859e-05	0.00118999	ENSMUSG00000028463	-1.49033	4.24359	13.3266	0.000261672	0.00789123	ENSMUSG00000073481	-0.348573
ENSMUSG00000048379	-0.251638	4.22896	16.1498	5.85262e-05	0.00184784	ENSMUSG00000008036	0.15714	6.51585	17.4059	3.01888e-05	0.000966384							ENSMUSG00000035757	-0.412617	4.3759	11.7108	0.00062138	0.0186979	ENSMUSG00000028967	-0.659605	4.97399	18.2353	1.95222e-05	0.000550015	ENSMUSG00000071551	-0.918282	1.09884	14.0671	0.000176404	0.0050803	ENSMUSG00000022781	-0.260042	6.3067	16.8611	4.02185e-05	0.00119682	ENSMUSG00000025868	0.218492	6.72628	13.3187	0.000262773	0.00789123	ENSMUSG00000034308	0.538975
ENSMUSG00000071660	-0.227021	5.14348	16.1453	5.86632e-05	0.00184784	ENSMUSG00000046351	0.28265	4.84366	17.3762	3.06634e-05	0.000979365							ENSMUSG00000091387	0.627087	5.89947	11.7099	0.000621677	0.0186979	ENSMUSG00000046229	0.330387	5.03298	18.2217	1.96622e-05	0.000552713	ENSMUSG00000032280	-0.236743	4.69579	14.0642	0.000176673	0.0050803	ENSMUSG00000046470	0.712422	4.1702	16.8574	4.02965e-05	0.00119682	ENSMUSG00000033047	0.215551	6.78651	13.3181	0.000262861	0.00789123	ENSMUSG00000017466	0.536436
ENSMUSG00000079038	-0.564944	2.4689	16.1437	5.87141e-05	0.00184784	ENSMUSG00000063558	-0.567196	3.59747	17.3606	3.09164e-05	0.000985226							ENSMUSG00000041372	-0.418169	4.98088	11.6948	0.000626751	0.0188082	ENSMUSG00000034160	-0.308311	7.39694	18.2012	1.98753e-05	0.000557448	ENSMUSG00000021819	-0.198538	6.4605	14.0591	0.000177154	0.0050803	ENSMUSG00000038848	-0.328689	5.39068	16.851	4.04323e-05	0.00119816	ENSMUSG00000013701	0.20995	6.09143	13.3147	0.000263337	0.00789123	ENSMUSG00000039704	-0.402832
ENSMUSG00000090100	-0.2672	6.62826	16.0745	6.08998e-05	0.00191065	ENSMUSG00000025533	0.306725	4.25352	17.3449	3.11729e-05	0.000989212							ENSMUSG00000021221	-0.525489	2.3465	11.6888	0.000628789	0.018827	ENSMUSG00000022772	-0.340279	4.57406	18.1341	2.05887e-05	0.000576159	ENSMUSG00000029060	-0.235074	5.44359	14.0544	0.000177594	0.0050803	ENSMUSG00000021149	-0.403386	5.46864	16.8404	4.0658e-05	0.00120135	ENSMUSG00000039231	-0.561262	3.24903	13.2927	0.000266436	0.00796619	ENSMUSG00000068267	0.462889
ENSMUSG00000031971	0.225346	5.76512	16.0719	6.09827e-05	0.00191065	ENSMUSG00000019577	0.866778	3.75797	17.3444	3.1181e-05	0.000989212							ENSMUSG00000020305	0.439957	2.85419	11.682	0.000631088	0.0188536	ENSMUSG00000007476	-0.513758	4.56288	18.1092	2.08591e-05	0.000581352	ENSMUSG00000033389	0.405625	5.47903	14.0491	0.000178102	0.0050803	ENSMUSG00000043671	0.574778	4.08302	16.835	4.07742e-05	0.00120135	ENSMUSG00000027282	0.245793	7.45044	13.2855	0.000267471	0.00797926	ENSMUSG00000052144	-0.351173
ENSMUSG00000078515	-0.198606	6.24515	16.0655	6.11898e-05	0.00191286	ENSMUSG00000027254	0.196918	10.7073	17.3336	3.136e-05	0.00099267							ENSMUSG00000034656	-0.599677	3.18364	11.6734	0.000634002	0.0188554	ENSMUSG00000026473	-0.714127	8.01157	18.1084	2.08674e-05	0.000581352	ENSMUSG00000025558	-0.251117	6.12376	14.0443	0.00017855	0.0050803	ENSMUSG00000112129	-0.501933	7.63045	16.8332	4.08134e-05	0.00120135	ENSMUSG00000118664	0.24139	5.42338	13.248	0.00027287	0.00811875	ENSMUSG00000069792	1.69736
ENSMUSG00000025354	-0.199379	6.04583	16.0373	6.2106e-05	0.00193718	ENSMUSG00000026790	-0.332099	6.87431	17.317	3.16336e-05	0.000999101							ENSMUSG00000030588	-0.496247	4.7592	11.6711	0.000634791	0.0188554	ENSMUSG00000029817	-0.505212	5.55064	18.0853	2.11225e-05	0.000587148	ENSMUSG00000022899	-1.12399	1.99324	14.0434	0.00017864	0.0050803	ENSMUSG00000033313	0.696438	2.37226	16.828	4.09245e-05	0.00120194	ENSMUSG00000022330	-0.675183	3.8225	13.2446	0.000273365	0.00811875	ENSMUSG00000049516	-0.592534
ENSMUSG00000021595	-0.166942	5.986	16.026	6.24801e-05	0.00194452	ENSMUSG00000022193	0.225313	5.20648	17.3023	3.18798e-05	0.00100464							ENSMUSG00000039834	-0.387214	4.74537	11.6693	0.000635383	0.0188554	ENSMUSG00000000957	1.08637	4.35564	18.0805	2.11762e-05	0.000587333	ENSMUSG00000020132	0.223147	7.44856	14.0238	0.000180512	0.00512214	ENSMUSG00000030086	0.591475	3.87078	16.822	4.10537e-05	0.00120306	ENSMUSG00000053293	-0.214074	5.08671	13.2403	0.000273996	0.00811942	ENSMUSG00000026131	-0.578119
ENSMUSG00000028655	-0.412739	4.3091	16.0066	6.31228e-05	0.00196017	ENSMUSG00000022518	-0.796945	1.0795	17.2826	3.22129e-05	0.00101131							ENSMUSG00000002108	-0.475466	6.25606	11.6353	0.000647102	0.0191209	ENSMUSG00000031955	0.373214	5.15489	17.9986	2.21067e-05	0.000611782	ENSMUSG00000063698	0.642025	2.89066	13.9886	0.000183921	0.0052073	ENSMUSG00000031534	0.366297	4.83259	16.8161	4.11817e-05	0.00120413	ENSMUSG00000030781	-0.317737	9.13894	13.2166	0.000277474	0.00820426	ENSMUSG00000020170	-0.318754
ENSMUSG00000038658	-0.200139	5.79722	15.9665	6.44742e-05	0.0019977	ENSMUSG00000021478	0.41331	5.11487	17.2813	3.22341e-05	0.00101131							ENSMUSG00000004032	0.755335	4.22338	11.6351	0.000647197	0.0191209	ENSMUSG00000026349	-0.395051	5.99626	17.9833	2.22852e-05	0.000615357	ENSMUSG00000025477	0.244926	8.45625	13.9628	0.000186459	0.00526747	ENSMUSG00000058756	0.368681	6.30025	16.8026	4.14769e-05	0.00121008	ENSMUSG00000037010	0.758784	3.59021	13.1801	0.000282935	0.00834721	ENSMUSG00000036461	0.433431
ENSMUSG00000028649	-0.279123	8.97457	15.9464	6.51599e-05	0.00201136	ENSMUSG00000041124	0.163596	5.80543	17.2753	3.23357e-05	0.00101226							ENSMUSG00000045411	-0.396349	5.19431	11.6281	0.000649626	0.0191503	ENSMUSG00000028771	-0.31556	5.1597	17.9756	2.23759e-05	0.000616356	ENSMUSG00000048965	-0.526419	1.83898	13.9339	0.000189355	0.00531596	ENSMUSG00000032602	-0.347012	5.95626	16.786	4.18408e-05	0.00121413	ENSMUSG00000037300	-0.258394	4.89638	13.1532	0.000287031	0.00844937	ENSMUSG00000021068	0.765297
ENSMUSG00000035575	-0.232742	5.44078	15.9452	6.52023e-05	0.00201136	ENSMUSG00000058355	0.181904	6.35881	17.2542	3.2697e-05	0.00102131							ENSMUSG00000033411	0.48775	4.30596	11.6119	0.000655307	0.0192753	ENSMUSG00000074909	-0.361591	4.53305	17.9718	2.24201e-05	0.000616356	ENSMUSG00000074886	-0.262474	5.09608	13.9316	0.000189583	0.00531596	ENSMUSG00000033676	-0.460313	7.09725	16.7827	4.19143e-05	0.00121413	ENSMUSG00000022437	0.238887	7.44055	13.1481	0.000287818	0.00845386	ENSMUSG00000036892	0.468349
ENSMUSG00000054752	-0.305806	5.24076	15.9385	6.54325e-05	0.00201403	ENSMUSG00000026208	-1.10476	1.58628	17.2298	3.31198e-05	0.00103225							ENSMUSG00000020231	0.500767	5.55946	11.5574	0.000674803	0.0197225	ENSMUSG00000038204	0.314944	6.66585	17.9649	2.2501e-05	0.000617221	ENSMUSG00000035297	0.209457	6.30167	13.9315	0.000189598	0.00531596	ENSMUSG00000036390	0.736479	4.81572	16.7816	4.19379e-05	0.00121413	ENSMUSG00000024558	0.333715	5.71172	13.1345	0.000289912	0.00846746	ENSMUSG00000062647	0.425981
ENSMUSG00000032359	0.426268	3.07066	15.9333	6.56154e-05	0.00201523	ENSMUSG00000030235	0.202917	6.04001	17.2121	3.34298e-05	0.00103962							ENSMUSG00000022255	0.332065	6.56969	11.5554	0.000675528	0.0197225	ENSMUSG00000020038	-0.670846	3.56586	17.8903	2.34017e-05	0.000640518	ENSMUSG00000028416	0.219318	7.73097	13.9291	0.000189841	0.00531596	ENSMUSG00000025791	-0.283397	6.71732	16.7767	4.20467e-05	0.00121413	ENSMUSG00000005233	0.887895	3.55708	13.1281	0.0002909	0.00846746	ENSMUSG00000020308	0.440537
ENSMUSG00000056952	-0.218243	5.17978	15.9087	6.64739e-05	0.00203713	ENSMUSG00000028333	-0.187299	5.4487	17.189	3.38398e-05	0.00105007							ENSMUSG00000051557	-0.462261	2.91513	11.554	0.000676026	0.0197225	ENSMUSG00000039233	-0.344797	4.33715	17.8778	2.35548e-05	0.000643299	ENSMUSG00000026248	0.269425	5.82816	13.8908	0.000193745	0.00541342	ENSMUSG00000020823	-0.380777	6.64415	16.7754	4.20761e-05	0.00121413	ENSMUSG00000023505	0.931189	1.17712	13.127	0.000291063	0.00846746	ENSMUSG00000062014	-0.346478
ENSMUSG00000052914	0.341895	4.29664	15.9006	6.67573e-05	0.00204135	ENSMUSG00000020069	-0.292552	5.60325	17.1646	3.42762e-05	0.00106129							ENSMUSG00000035459	-0.923118	0.605516	11.5494	0.000677726	0.0197225	ENSMUSG00000030701	0.95814	1.59286	17.8698	2.36541e-05	0.000644601	ENSMUSG00000042485	-0.378366	3.31512	13.8412	0.000198928	0.0055461	ENSMUSG00000024014	0.712316	3.78697	16.7642	4.23239e-05	0.00121861	ENSMUSG00000036580	-0.299404	4.90068	13.1248	0.000291412	0.00846746	ENSMUSG00000026577	-0.40582
ENSMUSG00000070304	-0.16769	8.51907	15.8808	6.74604e-05	0.00205835	ENSMUSG00000008129	0.72826	1.48779	17.158	3.43965e-05	0.00106195							ENSMUSG00000032411	0.350342	6.14478	11.5489	0.000677895	0.0197225	ENSMUSG00000089824	-0.425728	2.98589	17.8496	2.39071e-05	0.000650076	ENSMUSG00000037773	-0.325725	3.65122	13.8298	0.000200136	0.00556761	ENSMUSG00000036948	0.390979	4.62366	16.7217	4.32821e-05	0.0012403	ENSMUSG00000063929	-0.676435	3.05625	13.1197	0.000292208	0.00846746	ENSMUSG00000039456	-0.670718
ENSMUSG00000090213	-0.205819	5.208	15.8623	6.81209e-05	0.00207399	ENSMUSG00000075590	-0.296941	7.57752	17.1552	3.44472e-05	0.00106195							ENSMUSG00000023074	0.432904	4.09693	11.5369	0.000682278	0.0197318	ENSMUSG00000049625	0.995924	1.90413	17.8449	2.39661e-05	0.000650263	ENSMUSG00000030737	-0.562307	3.92502	13.813	0.000201934	0.00560542	ENSMUSG00000013483	0.616284	2.34939	16.717	4.33907e-05	0.0012403	ENSMUSG00000073616	0.267552	5.48558	13.1188	0.000292347	0.00846746	ENSMUSG00000020515	-0.324675
ENSMUSG00000029097	-0.36953	3.05661	15.8532	6.84518e-05	0.00207954	ENSMUSG00000066621	-0.225964	7.43628	17.1195	3.51005e-05	0.00107974							ENSMUSG00000003526	0.78841	5.58102	11.5364	0.000682477	0.0197318	ENSMUSG00000089809	-1.2125	3.51415	17.837	2.40654e-05	0.000651541	ENSMUSG00000069520	0.284917	4.03162	13.8015	0.000203176	0.00562767	ENSMUSG00000023939	0.324993	5.20191	16.7143	4.34524e-05	0.0012403	ENSMUSG00000038831	-0.378104	4.74449	13.1143	0.000293044	0.00846746	ENSMUSG00000032336	-0.322019
ENSMUSG00000020534	-0.622691	2.29738	15.716	7.35998e-05	0.00223109	ENSMUSG00000049404	-0.838038	0.543894	17.1117	3.52444e-05	0.00108182							ENSMUSG00000020652	-0.398139	3.47312	11.5359	0.000682648	0.0197318	ENSMUSG00000036908	0.724402	4.80873	17.8039	2.44877e-05	0.000660277	ENSMUSG00000051285	0.343532	6.52775	13.7913	0.000204284	0.00563425	ENSMUSG00000055866	-1.7973	5.57351	16.7143	4.34533e-05	0.0012403	ENSMUSG00000050010	0.706172	3.04264	13.1123	0.000293361	0.00846746	ENSMUSG00000050188	0.498782
ENSMUSG00000050244	-0.302114	4.55161	15.671	7.53697e-05	0.00227981	ENSMUSG00000074826	-1.03078	1.16929	17.1067	3.53367e-05	0.00108231							ENSMUSG00000033735	-0.378251	6.4611	11.5262	0.000686239	0.0197927	ENSMUSG00000029730	0.444007	3.76157	17.8034	2.44939e-05	0.000660277	ENSMUSG00000001128	-0.702055	3.69987	13.7912	0.000204296	0.00563425	ENSMUSG00000049969	0.280478	5.64296	16.6968	4.3854e-05	0.00124903	ENSMUSG00000047507	-0.720247	2.48396	13.106	0.000294352	0.0084686	ENSMUSG00000047250	0.561629
ENSMUSG00000040761	-0.297779	6.99384	15.6493	7.62395e-05	0.00230115	ENSMUSG00000015879	-0.295071	3.77192	17.0774	3.58866e-05	0.00109678							ENSMUSG00000030557	0.364691	5.56914	11.4925	0.000698789	0.0201113	ENSMUSG00000025867	0.556642	2.83161	17.7978	2.45665e-05	0.000660807	ENSMUSG00000020101	-0.433025	5.18708	13.7604	0.000207666	0.00570806	ENSMUSG00000025724	-0.496308	6.67042	16.6565	4.4796e-05	0.00127311	ENSMUSG00000050017	-0.221211	5.94385	13.104	0.000294671	0.0084686	ENSMUSG00000021278	1.04131
ENSMUSG00000024293	-0.300765	4.36455	15.6254	7.72085e-05	0.00232539	ENSMUSG00000055067	0.305772	4.95925	17.0724	3.59813e-05	0.00109731							ENSMUSG00000078495	1.89315	0.752485	11.4783	0.00070414	0.0202195	ENSMUSG00000021635	-0.379938	4.48347	17.7833	2.47549e-05	0.000664442	ENSMUSG00000023965	-0.365393	5.62628	13.756	0.000208151	0.00570806	ENSMUSG00000057967	-1.22761	0.440813	16.6169	4.57407e-05	0.00129717	ENSMUSG00000026385	0.342561	8.27756	13.0745	0.00029935	0.00858457	ENSMUSG00000117975	-1.01257
ENSMUSG00000079593	0.464086	3.61116	15.5919	7.85908e-05	0.00236194	ENSMUSG00000041841	0.295003	6.5607	17.0568	3.62781e-05	0.00110224							ENSMUSG00000074925	0.598214	4.99434	11.4745	0.000705579	0.0202195	ENSMUSG00000025613	-0.253736	7.07318	17.7027	2.58262e-05	0.000689055	ENSMUSG00000002699	-1.06752	2.27332	13.7546	0.000208313	0.00570806	ENSMUSG00000090698	-0.871523	1.52637	16.6008	4.61307e-05	0.00130542	ENSMUSG00000058301	-0.209905	6.7979	13.0438	0.000304295	0.00869401	ENSMUSG00000022404	-0.561683
ENSMUSG00000024251	-0.303211	4.18575	15.5672	7.96234e-05	0.00238785	ENSMUSG00000048330	0.172374	6.26251	17.055	3.63136e-05	0.00110224							ENSMUSG00000045795	-0.428887	5.44978	11.4632	0.000709861	0.0202616	ENSMUSG00000033029	-0.978419	1.01062	17.7027	2.58264e-05	0.000689055	ENSMUSG00000030983	0.275834	5.37235	13.7496	0.000208868	0.005711	ENSMUSG00000093930	-0.45782	9.19248	16.5947	4.62813e-05	0.00130688	ENSMUSG00000038274	0.243632	7.5684	13.0423	0.00030453	0.00869401	ENSMUSG00000053158	-0.67109
ENSMUSG00000032515	-0.535846	3.47718	15.5603	7.99145e-05	0.00239146	ENSMUSG00000027428	0.242893	4.68257	17.0517	3.6376e-05	0.00110224							ENSMUSG00000020687	0.373903	5.17862	11.4627	0.000710083	0.0202616	ENSMUSG00000031825	0.555012	5.76163	17.7019	2.58375e-05	0.000689055	ENSMUSG00000045763	-1.30984	2.72825	13.7379	0.000210166	0.00573421	ENSMUSG00000022971	0.441719	3.8062	16.5684	4.6926e-05	0.00132225	ENSMUSG00000056665	0.538694	4.66529	13.0377	0.00030528	0.00869401	ENSMUSG00000006342	-1.48304
ENSMUSG00000032303	0.732825	1.94216	15.5516	8.02856e-05	0.0023938	ENSMUSG00000040105	0.201095	5.43026	17.0014	3.73524e-05	0.00112941							ENSMUSG00000030265	0.338052	6.755	11.4501	0.000714916	0.0203561	ENSMUSG00000028982	-0.961885	4.33263	17.5883	2.74265e-05	0.000729345	ENSMUSG00000071656	-0.580283	2.475	13.7217	0.000211996	0.0057718	ENSMUSG00000023959	-0.481368	7.39781	16.5627	4.70675e-05	0.00132341	ENSMUSG00000025857	-0.234082	4.43445	13.0347	0.000305773	0.00869401	ENSMUSG00000018008	0.910536
ENSMUSG00000021327	-0.32593	5.53564	15.5479	8.04405e-05	0.0023938	ENSMUSG00000052997	0.138445	6.47211	16.9868	3.76414e-05	0.00113573							ENSMUSG00000041577	0.505103	4.61015	11.4401	0.000718743	0.0204215	ENSMUSG00000002393	0.327287	5.33815	17.5857	2.74651e-05	0.000729345	ENSMUSG00000048458	0.414339	4.94939	13.714	0.000212857	0.00578293	ENSMUSG00000031490	0.485995	3.75481	16.5534	4.7299e-05	0.00132709	ENSMUSG00000039640	0.229171	7.54224	12.9704	0.000316452	0.00897847	ENSMUSG00000015214	-0.48546
ENSMUSG00000032047	0.243321	6.27383	15.5464	8.05054e-05	0.0023938	ENSMUSG00000036568	-0.162471	6.60589	16.9769	3.78369e-05	0.00113921							ENSMUSG00000034177	-0.315492	5.45145	11.4155	0.000728355	0.0206364	ENSMUSG00000031570	-0.562168	3.51115	17.5694	2.77003e-05	0.000734029	ENSMUSG00000071669	-0.616252	2.61247	13.702	0.000214231	0.0058079	ENSMUSG00000031985	-0.404519	6.90556	16.5341	4.77826e-05	0.00133781	ENSMUSG00000031750	-1.00125	3.97446	12.957	0.000318721	0.00898656	ENSMUSG00000078942	1.16066
ENSMUSG00000042599	-0.336233	6.07115	15.5231	8.15021e-05	0.0024183	ENSMUSG00000038112	0.352512	4.48603	16.9639	3.80972e-05	0.00114422							ENSMUSG00000095026	-0.517674	5.12949	11.4128	0.000729397	0.0206364	ENSMUSG00000039934	-0.859788	3.42562	17.5266	2.83322e-05	0.000749182	ENSMUSG00000034390	-0.323395	4.23481	13.6681	0.000218124	0.00590091	ENSMUSG00000063428	0.485461	5.70478	16.5154	4.82567e-05	0.00134822	ENSMUSG00000027304	-0.199645	5.59554	12.955	0.000319076	0.00898656	ENSMUSG00000001248	-0.445155
ENSMUSG00000032816	-0.175825	6.43986	15.5007	8.24745e-05	0.00244198	ENSMUSG00000021494	-0.260501	5.11925	16.9605	3.8165e-05	0.00114422							ENSMUSG00000025280	-0.356453	4.30111	11.3903	0.000738292	0.0208439	ENSMUSG00000024002	0.226445	6.30014	17.5203	2.84251e-05	0.000750049	ENSMUSG00000068798	0.300944	5.85817	13.6522	0.00021998	0.00593383	ENSMUSG00000058135	-0.545612	8.96977	16.5099	4.83969e-05	0.00134928	ENSMUSG00000023120	-0.790276	6.68738	12.953	0.000319417	0.00898656	ENSMUSG00000019312	0.398635
ENSMUSG00000074743	0.325612	4.09569	15.467	8.39564e-05	0.00248061	ENSMUSG00000041986	0.217878	7.61935	16.9166	3.9058e-05	0.00116726							ENSMUSG00000040550	0.43121	4.29057	11.3713	0.000745863	0.0208849	ENSMUSG00000020732	1.05752	0.96982	17.5121	2.85481e-05	0.000751705	ENSMUSG00000015340	-1.08373	4.51627	13.6497	0.000220271	0.00593383	ENSMUSG00000021038	-0.245885	5.66747	16.4747	4.9304e-05	0.00137167	ENSMUSG00000017718	-0.683873	6.16086	12.9529	0.000319432	0.00898656	ENSMUSG00000055866	-1.60174
ENSMUSG00000003235	0.221068	5.69863	15.4557	8.44636e-05	0.00249034	ENSMUSG00000050824	0.950938	0.749247	16.9147	3.9098e-05	0.00116726							ENSMUSG00000027668	0.363473	5.90181	11.3606	0.000750174	0.0208849	ENSMUSG00000038550	-2.14082	4.02849	17.4769	2.90826e-05	0.000764169	ENSMUSG00000043953	0.517511	3.77043	13.6284	0.000222794	0.00597673	ENSMUSG00000021670	-0.741429	5.82225	16.4683	4.94694e-05	0.00137337	ENSMUSG00000026725	-0.911113	3.74295	12.9473	0.000320375	0.00899411	ENSMUSG00000040026	1.41115
ENSMUSG00000052794	0.376436	2.94616	15.4471	8.4846e-05	0.00249636	ENSMUSG00000024019	-0.364891	3.06553	16.8867	3.96794e-05	0.00118213							ENSMUSG00000025782	0.381245	3.52579	11.3603	0.000750326	0.0208849	ENSMUSG00000024737	1.03416	2.46049	17.4691	2.92016e-05	0.000765683	ENSMUSG00000023018	0.308857	5.84437	13.6283	0.000222799	0.00597673	ENSMUSG00000022111	0.321863	4.4659	16.4381	5.02643e-05	0.00139251	ENSMUSG00000000805	0.55465	7.48496	12.9392	0.00032177	0.00901428	ENSMUSG00000020782	0.527947
ENSMUSG00000028070	0.201737	5.3907	15.4409	8.51237e-05	0.00249928	ENSMUSG00000028339	-0.433474	3.39344	16.8643	4.0149e-05	0.00119361							ENSMUSG00000074604	-0.624398	8.04602	11.3573	0.000751535	0.0208849	ENSMUSG00000078570	0.483999	3.23378	17.4648	2.92672e-05	0.000765794	ENSMUSG00000032743	-0.517889	4.74273	13.5922	0.000227125	0.00607698	ENSMUSG00000037989	-1.01732	3.64673	16.3846	5.17048e-05	0.00142913	ENSMUSG00000030772	0.570406	4.43336	12.9343	0.000322617	0.00901908	ENSMUSG00000056313	-0.93929
ENSMUSG00000029246	-0.27828	4.52971	15.4318	8.55379e-05	0.00250619	ENSMUSG00000058230	0.175579	8.07786	16.8441	4.05802e-05	0.00120391							ENSMUSG00000017740	-0.92218	0.810292	11.3567	0.000751777	0.0208849	ENSMUSG00000048163	0.842704	2.45354	17.4606	2.93329e-05	0.000765909	ENSMUSG00000074652	-0.445474	8.12376	13.5882	0.000227606	0.00607698	ENSMUSG00000019433	0.29511	5.83851	16.3745	5.19794e-05	0.00142913	ENSMUSG00000025198	0.466117	6.37689	12.9151	0.000325949	0.00909317	ENSMUSG00000063019	0.38688
ENSMUSG00000071267	-0.257946	3.9265	15.4099	8.65334e-05	0.0025171	ENSMUSG00000042073	-0.599464	3.92834	16.8395	4.0677e-05	0.00120426							ENSMUSG00000033342	1.01785	0.573177	11.3544	0.000752706	0.0208849	ENSMUSG00000085795	0.553207	4.53772	17.4486	2.95186e-05	0.000769148	ENSMUSG00000079316	0.332464	4.51375	13.5853	0.000227964	0.00607698	ENSMUSG00000118663	-0.396395	4.01252	16.3704	5.20936e-05	0.00142913	ENSMUSG00000079497	-0.530289	2.68665	12.9016	0.000328308	0.00913985	ENSMUSG00000038811	0.944859
ENSMUSG00000030655	-0.450158	7.63566	15.4084	8.66045e-05	0.0025171	ENSMUSG00000022095	-0.237821	5.97651	16.7952	4.1639e-05	0.00123017							ENSMUSG00000018822	-1.55442	1.89493	11.3524	0.000753498	0.0208849	ENSMUSG00000024663	0.485727	3.53126	17.4084	3.01489e-05	0.000783642	ENSMUSG00000003363	-0.271366	5.11986	13.5797	0.000228639	0.00608228	ENSMUSG00000000305	1.14039	1.13001	16.37	5.21033e-05	0.00142913	ENSMUSG00000027639	0.426912	4.80765	12.8949	0.000329485	0.00915047	ENSMUSG00000055805	0.972383
ENSMUSG00000031665	0.389303	5.10139	15.4069	8.66722e-05	0.0025171	ENSMUSG00000054162	0.22581	6.95208	16.789	4.17737e-05	0.00123127							ENSMUSG00000036934	0.5663	2.70717	11.3494	0.000754734	0.0208849	ENSMUSG00000037553	0.328695	5.49194	17.4052	3.02004e-05	0.000783642	ENSMUSG00000010914	0.256094	7.2092	13.574	0.000229344	0.00608834	ENSMUSG00000030838	-0.485215	7.23828	16.3691	5.21281e-05	0.00142913	ENSMUSG00000019301	1.79236	1.39966	12.8916	0.000330062	0.00915047	ENSMUSG00000030315	-0.448616
ENSMUSG00000022151	-0.216592	5.3199	15.4064	8.66934e-05	0.0025171	ENSMUSG00000030979	0.466168	4.30939	16.7855	4.18511e-05	0.00123127							ENSMUSG00000064140	-1.04109	4.88308	11.3491	0.000754831	0.0208849	ENSMUSG00000023806	0.66327	4.45166	17.3985	3.03068e-05	0.000784366	ENSMUSG00000030911	1.2963	0.146196	13.5362	0.000234005	0.00619919	ENSMUSG00000038930	0.703872	2.53139	16.3562	5.24836e-05	0.00143589	ENSMUSG00000020814	-0.433785	3.1361	12.87	0.000333887	0.0092373	ENSMUSG00000026526	-0.502385
ENSMUSG00000028078	0.201087	6.8065	15.4039	8.68088e-05	0.0025171	ENSMUSG00000009145	-1.06191	0.73002	16.779	4.19945e-05	0.00123127							ENSMUSG00000020677	0.312979	4.31607	11.3478	0.000755384	0.0208849	ENSMUSG00000023068	-0.379918	6.15061	17.3955	3.0354e-05	0.000784366	ENSMUSG00000034024	0.159676	6.84781	13.53	0.000234786	0.006207	ENSMUSG00000098176	0.634639	1.98146	16.3451	5.27937e-05	0.00143992	ENSMUSG00000006932	-0.193344	8.68863	12.8554	0.000336501	0.00929034	ENSMUSG00000026409	-0.703405
ENSMUSG00000041809	-0.82312	1.47247	15.3901	8.74438e-05	0.00253027	ENSMUSG00000054976	0.299411	5.2375	16.7777	4.20234e-05	0.00123127							ENSMUSG00000029464	-0.352954	4.06672	11.3313	0.000762126	0.0210277	ENSMUSG00000038773	0.247845	6.17995	17.3907	3.04318e-05	0.00078475	ENSMUSG00000025280	-0.428689	4.6812	13.4991	0.000238681	0.00629694	ENSMUSG00000031990	0.693284	4.4627	16.3402	5.29297e-05	0.00143992	ENSMUSG00000024382	-0.230482	5.04071	12.8362	0.000339978	0.00936696	ENSMUSG00000020088	-0.301448
ENSMUSG00000020265	0.197953	6.36081	15.3857	8.76472e-05	0.00253093	ENSMUSG00000024208	0.211449	5.63264	16.77	4.21942e-05	0.00123372							ENSMUSG00000027463	1.2375	7.04369	11.325	0.000764719	0.0210558	ENSMUSG00000072640	0.523261	5.20527	17.3815	3.05793e-05	0.000786602	ENSMUSG00000073802	-1.14131	0.912492	13.4907	0.000239745	0.00631195	ENSMUSG00000074793	0.438289	3.43557	16.3392	5.29583e-05	0.00143992	ENSMUSG00000036968	0.343604	3.3193	12.8073	0.000345269	0.00949312	ENSMUSG00000068227	0.996282
ENSMUSG00000030329	0.18964	7.59993	15.3626	8.87294e-05	0.00255573	ENSMUSG00000010097	-0.21435	6.52956	16.7553	4.25236e-05	0.0012408							ENSMUSG00000061894	0.516814	2.25401	11.3078	0.000771842	0.0212082	ENSMUSG00000021250	-1.7855	2.7823	17.3783	3.06296e-05	0.000786602	ENSMUSG00000029310	0.211619	5.51563	13.4835	0.000240674	0.00632338	ENSMUSG00000047423	0.348739	4.92231	16.3039	5.39541e-05	0.00146398	ENSMUSG00000026127	0.240789	5.52808	12.7946	0.000347612	0.0095207	ENSMUSG00000029050	0.462094
ENSMUSG00000026475	-0.440912	4.28855	15.3595	8.88711e-05	0.00255573	ENSMUSG00000015476	-0.277319	7.7788	16.7491	4.26636e-05	0.00124232							ENSMUSG00000027890	-1.32554	4.38973	11.298	0.000775887	0.0212756	ENSMUSG00000032501	-0.942544	4.766	17.3646	3.08517e-05	0.000790679	ENSMUSG00000044147	-0.28394	5.24196	13.4699	0.000242427	0.00635637	ENSMUSG00000038143	-0.459699	3.7286	16.2984	5.41106e-05	0.00146521	ENSMUSG00000053094	0.211615	5.96106	12.7942	0.0003477	0.0095207	ENSMUSG00000004035	-0.670122
ENSMUSG00000004328	-1.07742	2.82384	15.3447	8.95742e-05	0.00257067	ENSMUSG00000002825	-0.348432	3.6297	16.7399	4.28698e-05	0.00124577							ENSMUSG00000058230	0.490413	5.33747	11.2924	0.000778243	0.0212964	ENSMUSG00000028581	0.858478	4.56321	17.3593	3.09378e-05	0.000791259	ENSMUSG00000021496	-0.319311	4.1254	13.4583	0.000243928	0.0063703	ENSMUSG00000038539	0.424811	3.77358	16.2735	5.48262e-05	0.00148154	ENSMUSG00000035566	-0.97496	5.25867	12.7897	0.000348532	0.00952392	ENSMUSG00000061046	0.498703
ENSMUSG00000022212	0.3509	7.64154	15.3357	9.00013e-05	0.0025754	ENSMUSG00000021493	-0.293581	5.73743	16.7199	4.33239e-05	0.00125639							ENSMUSG00000029714	-0.425072	5.49446	11.2638	0.000790334	0.0215816	ENSMUSG00000039956	-1.3246	2.16128	17.3493	3.1102e-05	0.000793831	ENSMUSG00000074657	-0.999474	1.35047	13.4553	0.000244309	0.0063703	ENSMUSG00000037907	0.400782	4.39314	16.1977	5.7064e-05	0.00153886	ENSMUSG00000068749	0.213385	5.61585	12.7574	0.000354602	0.00966997	ENSMUSG00000044676	-0.583848
ENSMUSG00000054263	-0.266275	6.17793	15.3335	9.01067e-05	0.0025754	ENSMUSG00000018171	0.18119	6.52941	16.6989	4.38062e-05	0.0012664							ENSMUSG00000028212	0.729563	2.99125	11.2601	0.000791897	0.0215816	ENSMUSG00000037032	0.497229	6.42863	17.3267	3.14727e-05	0.000800927	ENSMUSG00000032733	-0.317702	4.21743	13.4542	0.000244455	0.0063703	ENSMUSG00000025403	-0.391783	8.40512	16.1921	5.72309e-05	0.00154021	ENSMUSG00000031799	0.186663	6.07296	12.7475	0.000356479	0.00970132	ENSMUSG00000039956	0.734223
ENSMUSG00000062929	0.23437	6.05842	15.3206	9.07217e-05	0.00258769	ENSMUSG00000029840	0.240714	8.12994	16.6971	4.38475e-05	0.0012664							ENSMUSG00000031613	0.876411	8.17113	11.2101	0.000813543	0.0221264	ENSMUSG00000020811	0.581732	3.66325	17.3246	3.15083e-05	0.000800927	ENSMUSG00000030245	0.296351	4.51348	13.4416	0.000246107	0.00640029	ENSMUSG00000042082	-0.524496	8.331	16.178	5.76603e-05	0.00154861	ENSMUSG00000053137	-0.449438	2.49211	12.7307	0.000359708	0.00976927	ENSMUSG00000063694	-0.322756
ENSMUSG00000013921	-0.186462	9.45928	15.3082	9.13186e-05	0.00259943	ENSMUSG00000041477	-0.380346	4.44169	16.6735	4.43978e-05	0.00127968							ENSMUSG00000051149	-0.58761	2.82118	11.205	0.00081577	0.0221418	ENSMUSG00000010911	-0.507281	4.64227	17.3085	3.17757e-05	0.000805865	ENSMUSG00000079317	0.328255	3.67272	13.4358	0.000246869	0.00640704	ENSMUSG00000036908	0.551752	4.62077	16.1673	5.79873e-05	0.00155423	ENSMUSG00000028013	0.320446	7.12906	12.7156	0.000362611	0.00982808	ENSMUSG00000046230	-0.486999
ENSMUSG00000015484	0.41102	3.25551	15.2905	9.2179e-05	0.0026135	ENSMUSG00000014791	-0.545597	3.24153	16.6414	4.51547e-05	0.00129886							ENSMUSG00000052406	-0.282606	5.55969	11.1972	0.00081922	0.0221904	ENSMUSG00000025171	0.419317	4.29701	17.3052	3.18317e-05	0.000805865	ENSMUSG00000032741	-0.399326	5.96081	13.4191	0.000249072	0.00644907	ENSMUSG00000038227	0.303969	5.90792	16.16	5.82106e-05	0.00155581	ENSMUSG00000020798	-1.84086	1.47556	12.6516	0.000375236	0.0101322	ENSMUSG00000021611	1.18024
ENSMUSG00000035828	-0.258939	5.51823	15.2823	9.25785e-05	0.0026135	ENSMUSG00000041096	-0.140104	6.96528	16.6207	4.5651e-05	0.00130824							ENSMUSG00000051373	-1.19808	0.80167	11.186	0.00082417	0.0222427	ENSMUSG00000045215	1.23569	0.559022	17.2984	3.19459e-05	0.000807118	ENSMUSG00000020492	0.346127	4.04826	13.4159	0.000249498	0.00644907	ENSMUSG00000048763	0.531339	2.97488	16.1577	5.82825e-05	0.00155581	ENSMUSG00000003534	-0.234954	7.57356	12.6511	0.000375353	0.0101322	ENSMUSG00000027932	-1.09188
ENSMUSG00000074505	-0.370424	6.67246	15.2817	9.26112e-05	0.0026135	ENSMUSG00000022285	0.211137	9.65479	16.6201	4.56652e-05	0.00130824							ENSMUSG00000071647	-0.320441	5.05009	11.181	0.000826374	0.0222427	ENSMUSG00000024654	0.394733	5.69153	17.283	3.22054e-05	0.000812032	ENSMUSG00000073755	-0.852317	3.8217	13.4059	0.000250838	0.00645933	ENSMUSG00000038496	0.522674	4.23824	16.148	5.85815e-05	0.00155911	ENSMUSG00000038773	-0.21056	6.30045	12.6092	0.000383852	0.0103407	ENSMUSG00000032320	0.493549
ENSMUSG00000024112	0.256902	6.5307	15.2796	9.27102e-05	0.0026135	ENSMUSG00000033735	-0.254979	5.20594	16.5643	4.70277e-05	0.00134456							ENSMUSG00000031292	0.595136	1.67503	11.1803	0.000826702	0.0222427	ENSMUSG00000023861	-0.353926	6.95081	17.2674	3.24715e-05	0.000817089	ENSMUSG00000038872	-0.328829	4.66114	13.4054	0.000250907	0.00645933	ENSMUSG00000062014	-0.256001	7.20079	16.146	5.86426e-05	0.00155911	ENSMUSG00000002846	0.264353	4.9409	12.5985	0.00038606	0.0103793	ENSMUSG00000005483	-0.819906
ENSMUSG00000044030	0.182167	6.03884	15.2789	9.27463e-05	0.0026135	ENSMUSG00000052794	-0.422225	3.09748	16.5278	4.79427e-05	0.00136796							ENSMUSG00000034285	-0.564943	5.51194	11.1752	0.000828959	0.0222427	ENSMUSG00000020803	-0.275779	4.9338	17.2594	3.26077e-05	0.000818866	ENSMUSG00000002393	-0.300927	5.46562	13.3873	0.00025333	0.0065086	ENSMUSG00000065947	-1.52577	0.332143	16.1303	5.91304e-05	0.00156892	ENSMUSG00000019782	0.432251	3.89131	12.593	0.000387184	0.0103885	ENSMUSG00000079442	1.23343
ENSMUSG00000039634	-0.522359	3.2369	15.2331	9.50211e-05	0.00267223	ENSMUSG00000006641	-0.330582	5.1096	16.5154	4.82567e-05	0.00137415							ENSMUSG00000071178	1.18712	1.1475	11.1741	0.000829481	0.0222427	ENSMUSG00000050195	2.0739	2.25784	17.2446	3.28625e-05	0.000822563	ENSMUSG00000022012	1.07998	1.8295	13.3668	0.000256113	0.00655787	ENSMUSG00000043872	-0.791121	2.29763	16.0744	6.09027e-05	0.0016127	ENSMUSG00000034064	0.322793	4.64244	12.5879	0.000388257	0.0103964	ENSMUSG00000062075	-0.615097
ENSMUSG00000038718	0.366992	4.85744	15.1829	9.7581e-05	0.0027352	ENSMUSG00000032621	-0.208717	6.35568	16.5003	4.86411e-05	0.00138232							ENSMUSG00000028854	-0.370692	6.38617	11.157	0.000837149	0.0224034	ENSMUSG00000030122	0.488958	7.51948	17.2432	3.28867e-05	0.000822563	ENSMUSG00000007029	-0.282096	5.67351	13.3656	0.000256275	0.00655787	ENSMUSG00000035493	0.580121	3.23625	16.0684	6.10966e-05	0.001614	ENSMUSG00000059810	0.45574	3.75411	12.5739	0.000391163	0.0104532	ENSMUSG00000072235	1.17322
ENSMUSG00000005615	-0.24402	5.49006	15.1816	9.7651e-05	0.0027352	ENSMUSG00000022550	-0.320129	4.37053	16.4719	4.93752e-05	0.00140038							ENSMUSG00000046756	-0.412252	5.3065	11.1524	0.00083922	0.0224139	ENSMUSG00000026975	-0.533022	3.12107	17.2365	3.30026e-05	0.000823811	ENSMUSG00000029061	-0.557761	3.23997	13.358	0.000257323	0.00657152	ENSMUSG00000032537	-0.832568	2.1704	16.0653	6.11965e-05	0.001614	ENSMUSG00000032024	-0.550766	2.71303	12.5448	0.000397319	0.0105965	ENSMUSG00000026923	0.520842
ENSMUSG00000027508	-0.310225	5.36363	15.1717	9.81649e-05	0.00274411	ENSMUSG00000001891	0.235314	5.92168	16.4531	4.98697e-05	0.00141158							ENSMUSG00000030218	0.802817	3.86826	11.143	0.000843489	0.0224829	ENSMUSG00000024423	-0.364879	5.1891	17.2286	3.31404e-05	0.000824649	ENSMUSG00000026480	-0.859328	2.66189	13.3493	0.000258514	0.00658251	ENSMUSG00000024885	0.689957	3.7145	16.0539	6.15656e-05	0.00161771	ENSMUSG00000032251	0.479174	3.29927	12.5328	0.000399861	0.010643	ENSMUSG00000015176	-0.543691
ENSMUSG00000034243	-0.212805	7.2135	15.1595	9.8801e-05	0.00275636	ENSMUSG00000059851	-0.393212	4.73579	16.435	5.03468e-05	0.00142225							ENSMUSG00000017307	-0.366535	5.46406	11.1382	0.000845693	0.0224968	ENSMUSG00000055202	-1.08967	0.488497	17.2238	3.32245e-05	0.000824649	ENSMUSG00000028744	-0.463447	2.45226	13.3459	0.000258989	0.00658251	ENSMUSG00000046229	0.48189	6.28916	16.0533	6.15827e-05	0.00161771	ENSMUSG00000062526	-0.354068	4.71962	12.5187	0.000402897	0.0106839	ENSMUSG00000020225	-0.260311
ENSMUSG00000037416	-0.327595	6.15751	15.1557	9.89967e-05	0.00275636	ENSMUSG00000038463	0.541641	3.15036	16.4284	5.05231e-05	0.00142439							ENSMUSG00000022811	0.355059	5.70452	11.1265	0.000851044	0.0225941	ENSMUSG00000015759	-0.278415	5.26899	17.2199	3.32932e-05	0.000824649	ENSMUSG00000039958	0.649276	3.4198	13.3425	0.000259464	0.00658251	ENSMUSG00000024792	0.339421	4.15465	16.0444	6.18754e-05	0.00162217	ENSMUSG00000061825	0.841747	7.55626	12.517	0.000403267	0.0106839	ENSMUSG00000048486	-0.512052
ENSMUSG00000054405	0.204622	6.15588	15.1404	9.98064e-05	0.00277339	ENSMUSG00000027395	-0.344821	4.38338	16.4168	5.08337e-05	0.0014303							ENSMUSG00000002032	-0.503157	3.19025	11.122	0.000853076	0.0226031	ENSMUSG00000022827	0.408351	3.42883	17.2195	3.33005e-05	0.000824649	ENSMUSG00000079508	0.265367	6.24273	13.3399	0.000259815	0.00658251	ENSMUSG00000042351	1.14568	0.431385	16.034	6.22145e-05	0.00162498	ENSMUSG00000046516	0.234335	5.84543	12.5143	0.000403853	0.0106839	ENSMUSG00000032353	-0.441064
ENSMUSG00000028436	-0.173537	5.81471	15.1359	0.000100041	0.00277439	ENSMUSG00000040263	-0.21459	4.7673	16.4004	5.12735e-05	0.0014389							ENSMUSG00000027322	-1.173	1.59993	11.1176	0.000855126	0.0226126	ENSMUSG00000027709	-0.333355	6.24554	17.1714	3.41546e-05	0.000844126	ENSMUSG00000026544	-0.570818	3.14127	13.3202	0.000262563	0.00663894	ENSMUSG00000030474	1.27556	0.301578	16.0336	6.22291e-05	0.00162498	ENSMUSG00000039199	-0.265295	5.19607	12.5108	0.000404601	0.0106839	ENSMUSG00000010755	0.4412
ENSMUSG00000036291	-0.311026	4.9199	15.093	0.00010234	0.00283056	ENSMUSG00000031398	-0.293272	5.58842	16.3979	5.13423e-05	0.0014389							ENSMUSG00000033396	-0.304138	5.05447	11.1025	0.000862134	0.0227243	ENSMUSG00000000805	-0.660928	4.46127	17.1492	3.45548e-05	0.000852328	ENSMUSG00000048163	-0.889445	2.84271	13.3075	0.000264341	0.0066707	ENSMUSG00000031642	-0.575261	5.8195	16.0292	6.23727e-05	0.00162498	ENSMUSG00000032076	-0.477615	4.63454	12.4943	0.000408202	0.0107564	ENSMUSG00000089809	-1.46203
ENSMUSG00000017721	0.230847	6.73838	15.0892	0.00010255	0.00283056	ENSMUSG00000030678	-0.184599	7.73782	16.3725	5.20338e-05	0.00145526							ENSMUSG00000028207	0.334895	5.68907	11.1	0.000863286	0.0227243	ENSMUSG00000037940	-0.572388	5.62283	17.0986	3.54883e-05	0.000873628	ENSMUSG00000095567	-0.249392	5.39188	13.2729	0.000269273	0.00677486	ENSMUSG00000040028	-0.266735	6.03617	16.0261	6.24757e-05	0.00162498	ENSMUSG00000027395	-0.31696	4.65425	12.4908	0.000408961	0.0107564	ENSMUSG00000030465	-0.414172
ENSMUSG00000038141	0.870214	5.55476	15.0849	0.000102784	0.00283056	ENSMUSG00000031858	-0.196026	6.7734	16.369	5.21313e-05	0.00145526							ENSMUSG00000033039	-0.352852	5.02686	11.0975	0.000864456	0.0227243	ENSMUSG00000031701	-0.293846	8.05581	17.0936	3.55815e-05	0.000874197	ENSMUSG00000038844	0.626011	5.72722	13.2694	0.000269775	0.00677486	ENSMUSG00000027004	-0.501424	6.03488	16.0017	6.32842e-05	0.00164277	ENSMUSG00000074272	-0.725235	4.77971	12.478	0.000411773	0.010809	ENSMUSG00000015659	-0.479716
ENSMUSG00000055401	0.355985	4.21303	15.0832	0.000102874	0.00283056	ENSMUSG00000043059	-0.20187	4.80662	16.3168	5.35862e-05	0.00148873							ENSMUSG00000024457	-0.327297	6.61507	11.0736	0.000875641	0.0229731	ENSMUSG00000069094	-0.742119	5.7358	17.0776	3.58832e-05	0.000878014	ENSMUSG00000002728	0.247167	5.65357	13.2674	0.000270061	0.00677486	ENSMUSG00000091811	0.499715	4.27387	15.9845	6.38639e-05	0.00165292	ENSMUSG00000055629	1.39205	1.0747	12.4426	0.000419658	0.0109944	ENSMUSG00000049882	1.06692
ENSMUSG00000037386	-0.154027	7.00421	15.074	0.000103379	0.0028352	ENSMUSG00000034009	-0.503904	4.49883	16.3168	5.35872e-05	0.00148873							ENSMUSG00000040415	-0.507277	4.31365	11.0649	0.00087977	0.0230362	ENSMUSG00000028232	-0.467743	3.35569	17.0758	3.59175e-05	0.000878014	ENSMUSG00000030417	0.31659	5.7095	13.2607	0.000271035	0.00677856	ENSMUSG00000057933	1.91471	6.02491	15.9827	6.39256e-05	0.00165292	ENSMUSG00000015149	0.175517	6.38686	12.4114	0.000426721	0.0111575	ENSMUSG00000029369	-0.403558
ENSMUSG00000033545	0.177527	6.69493	15.0721	0.00010348	0.0028352	ENSMUSG00000014850	-0.287265	4.49582	16.3147	5.36452e-05	0.00148873							ENSMUSG00000035245	-0.502904	4.60415	11.0581	0.000883004	0.023062	ENSMUSG00000026096	-0.49831	3.55563	17.0742	3.59479e-05	0.000878014	ENSMUSG00000017309	0.201535	6.68467	13.259	0.00027127	0.00677856	ENSMUSG00000003531	0.423647	5.47815	15.9784	6.40705e-05	0.00165342	ENSMUSG00000030677	0.997422	0.972081	12.3915	0.000431293	0.011255	ENSMUSG00000022528	1.06161
ENSMUSG00000030168	-0.395174	6.06103	15.069	0.00010365	0.0028352	ENSMUSG00000074165	0.351599	5.21528	16.3015	5.40209e-05	0.00149613							ENSMUSG00000023122	1.19538	1.26049	11.0556	0.000884212	0.023062	ENSMUSG00000006678	-0.524305	2.82823	17.0683	3.60592e-05	0.000879013	ENSMUSG00000039062	-0.459349	4.09306	13.2445	0.000273386	0.00680487	ENSMUSG00000062753	0.479216	3.01721	15.9457	6.51865e-05	0.00167614	ENSMUSG00000051671	0.403222	4.97091	12.3673	0.000436917	0.011361	ENSMUSG00000027774	-0.339264
ENSMUSG00000031431	-0.494751	6.28315	15.0649	0.000103876	0.00283584	ENSMUSG00000043857	0.197125	6.71807	16.2931	5.42603e-05	0.00149613							ENSMUSG00000020827	-0.361924	7.01965	11.0518	0.000885993	0.0230635	ENSMUSG00000022774	-0.335061	4.94485	17.0477	3.64524e-05	0.000886867	ENSMUSG00000037062	0.316547	8.22551	13.2444	0.000273389	0.00680487	ENSMUSG00000030798	1.23661	1.08411	15.9451	6.52052e-05	0.00167614	ENSMUSG00000002147	-0.262459	6.6819	12.3667	0.000437059	0.011361	ENSMUSG00000029581	0.676883
ENSMUSG00000036111	0.324572	3.2493	15.0334	0.000105624	0.00287795	ENSMUSG00000060548	0.235753	5.67267	16.2919	5.42944e-05	0.00149613							ENSMUSG00000114797	0.365512	4.96696	11.0432	0.000890154	0.0231024	ENSMUSG00000032312	0.310127	4.93536	17.0425	3.6552e-05	0.000887559	ENSMUSG00000022808	0.238614	5.38912	13.2303	0.000275454	0.00684294	ENSMUSG00000013698	0.407905	6.30383	15.9367	6.54975e-05	0.00168038	ENSMUSG00000075327	-0.300404	3.84697	12.3361	0.000444287	0.0115264	ENSMUSG00000022883	1.13537
ENSMUSG00000006649	-1.23393	1.08515	15.0114	0.000106864	0.00290607	ENSMUSG00000040429	-0.649193	1.28564	16.2906	5.43338e-05	0.00149613							ENSMUSG00000033933	0.289447	4.66965	11.0415	0.000890949	0.0231024	ENSMUSG00000022178	0.420179	3.35676	17.0352	3.6693e-05	0.000889254	ENSMUSG00000073702	0.207614	7.26013	13.218	0.000277267	0.00687462	ENSMUSG00000028559	-0.497086	8.44385	15.9314	6.56811e-05	0.00168182	ENSMUSG00000037754	-0.606068	7.89649	12.3218	0.000447702	0.0115924	ENSMUSG00000035842	0.527635
ENSMUSG00000002763	0.502188	6.09113	14.9995	0.000107539	0.00291779	ENSMUSG00000004677	-0.24617	6.35404	16.2798	5.46438e-05	0.00150175							ENSMUSG00000070705	-0.540057	1.6374	11.028	0.000897471	0.0232264	ENSMUSG00000057230	-0.266744	6.72711	17.0234	3.69225e-05	0.000893081	ENSMUSG00000090877	3.04512	3.67728	13.208	0.000278758	0.00689817	ENSMUSG00000026821	0.512297	4.42704	15.8635	6.80776e-05	0.0017398	ENSMUSG00000032215	1.80359	3.46713	12.3109	0.000450327	0.0116378	ENSMUSG00000005320	0.446591
ENSMUSG00000036322	1.31002	0.0983485	14.9962	0.00010773	0.00291779	ENSMUSG00000029447	0.164938	7.19491	16.2686	5.49681e-05	0.00150578							ENSMUSG00000079658	0.345821	5.24043	11.015	0.000903768	0.0233441	ENSMUSG00000012017	0.475593	4.18408	17.0076	3.72303e-05	0.000898784	ENSMUSG00000027601	0.256926	5.69472	13.1663	0.000285028	0.00703969	ENSMUSG00000058927	-1.49959	0.438374	15.8497	6.85767e-05	0.00174917	ENSMUSG00000004231	-0.279811	5.8125	12.2712	0.000460012	0.0118651	ENSMUSG00000043099	0.670572
ENSMUSG00000032431	0.417896	2.78488	14.9928	0.00010792	0.00291779	ENSMUSG00000024949	-0.141811	7.69986	16.2674	5.50029e-05	0.00150578							ENSMUSG00000025907	0.509271	5.99107	11.0112	0.000905608	0.0233465	ENSMUSG00000042541	-0.393824	6.53789	16.9901	3.75758e-05	0.000905374	ENSMUSG00000054640	0.345206	9.11318	13.1482	0.000287794	0.00709429	ENSMUSG00000020377	0.845773	1.32036	15.8212	6.96193e-05	0.00177234	ENSMUSG00000041696	0.557776	3.01054	12.2552	0.000463966	0.011944	ENSMUSG00000032231	0.617711
ENSMUSG00000079003	0.247354	4.81036	14.986	0.000108311	0.00292272	ENSMUSG00000031932	0.508654	4.66712	16.2364	5.59095e-05	0.00152683							ENSMUSG00000028522	0.393671	6.28417	10.984	0.000919015	0.0236465	ENSMUSG00000070462	0.500013	4.57113	16.9769	3.78376e-05	0.000909926	ENSMUSG00000098557	-0.672149	5.72968	13.1284	0.000290851	0.00715583	ENSMUSG00000049295	0.305942	5.41864	15.81	7.00323e-05	0.00177941	ENSMUSG00000015354	0.673223	1.16788	12.2446	0.000466612	0.011989	ENSMUSG00000020456	-0.336949
ENSMUSG00000051817	0.30586	5.28755	14.9823	0.000108524	0.00292284	ENSMUSG00000020836	-0.427976	6.1451	16.2338	5.59868e-05	0.00152683							ENSMUSG00000037405	0.640378	3.717	10.9803	0.000920834	0.0236477	ENSMUSG00000024360	-0.238395	7.02333	16.9431	3.85179e-05	0.000922804	ENSMUSG00000035000	-0.609115	3.02779	13.1091	0.000293871	0.00721624	ENSMUSG00000049807	0.491217	4.15224	15.7971	7.05106e-05	0.00178812	ENSMUSG00000025188	-0.436018	4.60961	12.2403	0.000467672	0.0119931	ENSMUSG00000020334	-0.803938
ENSMUSG00000031530	-0.537856	3.81751	14.9699	0.000109242	0.00293094	ENSMUSG00000027827	0.196447	6.95874	16.2218	5.63417e-05	0.00153355							ENSMUSG00000018381	-0.591537	2.92948	10.9577	0.000932142	0.0238922	ENSMUSG00000010803	-2.1436	1.08065	16.9429	3.8521e-05	0.000922804	ENSMUSG00000041642	-0.669094	2.62531	13.1014	0.000295068	0.00723173	ENSMUSG00000049580	-1.07644	4.97682	15.7875	7.08678e-05	0.00179318	ENSMUSG00000022112	0.845962	1.6059	12.2362	0.000468708	0.0119966	ENSMUSG00000033557	-0.390499
ENSMUSG00000038415	0.465563	2.58454	14.9698	0.000109243	0.00293094	ENSMUSG00000029798	0.477725	2.78856	16.204	5.68748e-05	0.0015451							ENSMUSG00000074158	0.760925	1.96734	10.9524	0.000934832	0.0239152	ENSMUSG00000074218	-0.481684	8.74585	16.9065	3.92662e-05	0.00093624	ENSMUSG00000029822	0.453731	5.68891	13.0789	0.000298646	0.00730436	ENSMUSG00000017801	-0.31876	5.87478	15.7823	7.10643e-05	0.00179318	ENSMUSG00000038224	-0.55243	8.95208	12.2289	0.000470541	0.0120204	ENSMUSG00000021754	0.563192
ENSMUSG00000030786	0.683228	1.7621	14.9356	0.000111244	0.00297892	ENSMUSG00000024646	0.241178	5.01262	16.1576	5.82832e-05	0.00158033							ENSMUSG00000034765	-0.767668	5.16602	10.9402	0.00094101	0.0239983	ENSMUSG00000024308	0.327744	6.46014	16.9046	3.93066e-05	0.00093624	ENSMUSG00000023999	-0.858384	2.13823	13.0755	0.000299176	0.00730436	ENSMUSG00000004952	0.735869	2.86482	15.7778	7.12323e-05	0.00179318	ENSMUSG00000048970	0.334023	4.61055	12.1841	0.000481992	0.0122894	ENSMUSG00000025933	0.92858
ENSMUSG00000061740	-0.458913	5.59916	14.9052	0.000113049	0.00302146	ENSMUSG00000020681	-0.257158	5.24413	16.136	5.89523e-05	0.00159542							ENSMUSG00000046351	0.524648	3.75551	10.9357	0.000943304	0.0239983	ENSMUSG00000027574	1.04611	1.51081	16.9046	3.93069e-05	0.00093624	ENSMUSG00000095325	0.431468	3.37997	13.0698	0.000300088	0.00730632	ENSMUSG00000076435	0.591517	4.72276	15.7746	7.13529e-05	0.00179318	ENSMUSG00000026853	0.243512	7.6811	12.1723	0.000485046	0.0123313	ENSMUSG00000021423	0.977213
ENSMUSG00000029263	-0.270163	4.43239	14.879	0.000114634	0.003058	ENSMUSG00000029247	0.166868	6.5378	16.1038	5.99625e-05	0.00161967							ENSMUSG00000066306	-0.346579	7.67026	10.9353	0.000943472	0.0239983	ENSMUSG00000037608	-0.409464	6.22098	16.8891	3.96279e-05	0.000942087	ENSMUSG00000022965	0.315882	7.73426	13.0679	0.000300401	0.00730632	ENSMUSG00000004319	-0.325833	7.6161	15.7736	7.13899e-05	0.00179318	ENSMUSG00000043085	0.384729	4.84819	12.1706	0.000485485	0.0123313	ENSMUSG00000063235	-0.457929
ENSMUSG00000022514	-0.212834	5.18993	14.8591	0.000115846	0.00308446	ENSMUSG00000074794	0.325075	5.57459	16.0825	6.06427e-05	0.00163493							ENSMUSG00000042363	0.562379	5.74167	10.9152	0.000953759	0.0242139	ENSMUSG00000036918	0.563348	4.98214	16.8735	3.99562e-05	0.000948087	ENSMUSG00000041115	-0.189328	6.46167	13.057	0.000302159	0.0073351	ENSMUSG00000034300	-0.234793	5.94125	15.7315	7.29974e-05	0.00183007	ENSMUSG00000022426	0.387738	5.54207	12.1662	0.000486637	0.0123371	ENSMUSG00000057778	-0.325796
ENSMUSG00000072704	-0.249967	6.92869	14.8353	0.000117317	0.0031177	ENSMUSG00000067597	-1.10118	-0.0710097	16.077	6.08175e-05	0.00163653							ENSMUSG00000036686	-0.310083	5.8346	10.9055	0.00095881	0.0242959	ENSMUSG00000034617	-0.317662	4.66137	16.8631	4.01746e-05	0.000950793	ENSMUSG00000069114	0.262751	4.52149	13.0339	0.000305901	0.00741186	ENSMUSG00000019368	-1.93042	1.99371	15.7113	7.37806e-05	0.00184619	ENSMUSG00000020838	-0.800138	3.41982	12.1598	0.000488311	0.012356	ENSMUSG00000073680	-0.644983
ENSMUSG00000000320	0.990213	0.349335	14.8158	0.000118536	0.00314413	ENSMUSG00000022554	-0.315105	3.63514	16.0618	6.13095e-05	0.00164665							ENSMUSG00000026885	-0.936991	0.766993	10.8707	0.000976974	0.0246984	ENSMUSG00000042106	0.514894	2.34772	16.8574	4.02967e-05	0.000950793	ENSMUSG00000050640	-0.991799	2.84199	13.0124	0.000309439	0.00744403	ENSMUSG00000035780	-1.97303	1.84556	15.6958	7.43908e-05	0.00185794	ENSMUSG00000021770	-0.35524	6.82792	12.1469	0.000491691	0.0124018	ENSMUSG00000079104	-0.283063
ENSMUSG00000033316	-0.248817	6.33008	14.7957	0.000119809	0.00317189	ENSMUSG00000025137	-0.277013	6.57052	16.046	6.18229e-05	0.0016573							ENSMUSG00000015002	0.363249	6.49169	10.868	0.000978393	0.0246984	ENSMUSG00000029802	-0.561749	4.32727	16.856	4.03263e-05	0.000950793	ENSMUSG00000035697	-0.529418	4.19255	13.0116	0.000309569	0.00744403	ENSMUSG00000031574	3.45832	4.34871	15.662	7.57291e-05	0.00188779	ENSMUSG00000028495	0.211415	7.07878	12.1458	0.000491979	0.0124018	ENSMUSG00000074746	-0.307461
ENSMUSG00000022519	-0.661231	3.00385	14.7583	0.000122207	0.00322927	ENSMUSG00000038570	0.623516	1.73043	16.0086	6.30541e-05	0.0016865							ENSMUSG00000023030	-0.401479	6.35765	10.8582	0.000983573	0.0247823	ENSMUSG00000021990	0.381927	4.93425	16.8537	4.0375e-05	0.000950793	ENSMUSG00000071662	0.248944	4.8066	13.0049	0.00031068	0.00744403	ENSMUSG00000044816	0.869236	4.26186	15.6493	7.62399e-05	0.00189693	ENSMUSG00000034566	0.230617	7.79044	12.1276	0.000496807	0.0124999	ENSMUSG00000054855	0.752151
ENSMUSG00000035284	-0.266416	7.01572	14.7278	0.000124204	0.00327585	ENSMUSG00000061099	-0.545294	1.95818	16.0058	6.315e-05	0.0016865							ENSMUSG00000021816	0.324624	5.8578	10.846	0.000990083	0.0248933	ENSMUSG00000044030	0.293769	4.99285	16.7838	4.18891e-05	0.000984103	ENSMUSG00000060935	0.313866	4.40052	13.0047	0.000310712	0.00744403	ENSMUSG00000025981	-0.988058	5.42871	15.6438	7.64619e-05	0.00189887	ENSMUSG00000025154	0.582441	1.40149	12.1137	0.000500539	0.0125534	ENSMUSG00000022587	0.771596
ENSMUSG00000078812	0.157068	7.98268	14.7157	0.000125002	0.0032907	ENSMUSG00000023191	-0.398102	5.24877	15.9975	6.34264e-05	0.00168976							ENSMUSG00000078776	-1.19045	2.12453	10.8426	0.00099193	0.0248933	ENSMUSG00000019966	-0.43274	6.15738	16.7812	4.19472e-05	0.000984103	ENSMUSG00000020962	0.235373	4.90959	13.0043	0.000310774	0.00744403	ENSMUSG00000023050	0.495111	3.07128	15.638	7.66979e-05	0.00190116	ENSMUSG00000038384	-0.234942	5.95284	12.1126	0.000500816	0.0125534	ENSMUSG00000040236	0.339527
ENSMUSG00000036834	-0.264597	4.43666	14.6787	0.000127481	0.00334966	ENSMUSG00000020793	-1.37064	0.624425	15.995	6.35105e-05	0.00168976							ENSMUSG00000058997	-0.526425	6.7702	10.8395	0.00099357	0.0248933	ENSMUSG00000026049	-0.724409	1.61556	16.7774	4.20299e-05	0.000984195	ENSMUSG00000056228	-0.329487	5.15961	13.0043	0.000310782	0.00744403	ENSMUSG00000110622	1.03512	1.85571	15.6336	7.68769e-05	0.00190202	ENSMUSG00000002100	-0.706724	3.31649	12.0968	0.000505093	0.0126368	ENSMUSG00000054889	0.536327
ENSMUSG00000006304	0.210942	7.25263	14.6617	0.000128636	0.00337369	ENSMUSG00000037492	0.288047	5.89394	15.9732	6.42443e-05	0.00170608							ENSMUSG00000026535	1.58564	0.651203	10.8264	0.00100065	0.0250117	ENSMUSG00000004980	-0.28392	9.03126	16.7628	4.23557e-05	0.000989951	ENSMUSG00000037754	-0.559379	4.9901	13.0011	0.00031131	0.00744403	ENSMUSG00000039004	0.319664	6.61135	15.6115	7.77806e-05	0.00192077	ENSMUSG00000029273	0.462285	8.89574	12.0849	0.000508323	0.0126741	ENSMUSG00000022300	-0.321589
ENSMUSG00000024054	-0.203797	5.40156	14.6313	0.000130724	0.00341577	ENSMUSG00000040938	-0.617308	5.44274	15.9436	6.52591e-05	0.00172853							ENSMUSG00000024180	0.627756	7.6395	10.8238	0.00100204	0.0250117	ENSMUSG00000055485	0.643121	4.4315	16.7593	4.24344e-05	0.000989951	ENSMUSG00000051034	0.496974	2.55278	12.983	0.000314326	0.00750148	ENSMUSG00000063362	-0.349702	4.87651	15.6007	7.82255e-05	0.00192815	ENSMUSG00000039745	-0.369869	4.40382	12.0843	0.000508486	0.0126741	ENSMUSG00000000078	0.891496
ENSMUSG00000039405	0.466432	2.55138	14.6313	0.000130729	0.00341577	ENSMUSG00000061589	-0.422315	7.28999	15.9414	6.53335e-05	0.00172853							ENSMUSG00000050079	0.289825	4.98242	10.814	0.00100734	0.0250971	ENSMUSG00000033209	0.515442	5.53778	16.7472	4.27063e-05	0.000993475	ENSMUSG00000020956	0.45272	3.05966	12.9797	0.000314887	0.00750148	ENSMUSG00000036111	1.00922	1.23639	15.5876	7.8768e-05	0.0019379	ENSMUSG00000029186	0.381818	4.68661	12.0788	0.000509987	0.0126878	ENSMUSG00000028359	3.56073
ENSMUSG00000038894	-0.341728	6.57996	14.6241	0.000131226	0.00342237	ENSMUSG00000039623	-0.23028	4.98377	15.9252	6.58971e-05	0.0017402							ENSMUSG00000044681	-1.28389	4.16938	10.8106	0.00100923	0.0250973	ENSMUSG00000057156	0.557096	2.24721	16.7454	4.27447e-05	0.000993475	ENSMUSG00000029454	-0.570562	2.04852	12.9674	0.000316961	0.00753218	ENSMUSG00000026656	0.551034	4.75301	15.5796	7.91035e-05	0.00194253	ENSMUSG00000049940	-0.216518	6.28436	12.0678	0.000513009	0.0127249	ENSMUSG00000031634	-0.333455
ENSMUSG00000006057	0.169636	6.72757	14.6171	0.000131711	0.00342865	ENSMUSG00000022905	0.168188	7.0563	15.9028	6.66813e-05	0.00175763							ENSMUSG00000030610	-0.457395	3.40047	10.7988	0.00101565	0.0252099	ENSMUSG00000002111	0.931412	2.71825	16.6896	4.40227e-05	0.00102128	ENSMUSG00000015189	0.209839	5.38162	12.9651	0.000317356	0.00753218	ENSMUSG00000031016	-1.17566	4.48505	15.5664	7.96562e-05	0.00195246	ENSMUSG00000014856	0.282002	5.08297	12.0664	0.000513386	0.0127249	ENSMUSG00000001128	0.687791
ENSMUSG00000048029	0.68357	1.67794	14.6074	0.000132391	0.00343996	ENSMUSG00000002997	0.29122	6.08454	15.8945	6.69714e-05	0.00176201							ENSMUSG00000071637	0.996592	4.46308	10.7916	0.00101961	0.0252615	ENSMUSG00000049957	-0.503836	3.6543	16.6752	4.43571e-05	0.00102713	ENSMUSG00000048799	0.291511	5.0734	12.9611	0.000318022	0.007534	ENSMUSG00000027822	-0.471892	6.93088	15.5436	8.06238e-05	0.00197252	ENSMUSG00000034714	-0.420677	6.53891	12.0604	0.000515049	0.0127424	ENSMUSG00000030220	0.641682
ENSMUSG00000026921	0.401477	4.43121	14.6032	0.000132689	0.00344131	ENSMUSG00000021646	-0.293222	4.59097	15.8759	6.76363e-05	0.0017762							ENSMUSG00000031605	0.425571	5.18206	10.7875	0.00102189	0.0252711	ENSMUSG00000039347	-0.479582	4.25914	16.6643	4.46128e-05	0.00103113	ENSMUSG00000042532	-1.01478	0.669495	12.9519	0.000319589	0.00755709	ENSMUSG00000039361	-0.288715	8.44108	15.5394	8.0802e-05	0.00197322	ENSMUSG00000038633	-0.216207	7.39519	12.0528	0.000517137	0.0127663	ENSMUSG00000091474	-0.732417
ENSMUSG00000031024	-0.431895	4.90007	14.5915	0.000133517	0.00345639	ENSMUSG00000034453	-0.245961	4.51347	15.8651	6.80215e-05	0.00178302							ENSMUSG00000034903	0.447305	4.91689	10.7799	0.00102606	0.0252715	ENSMUSG00000025510	-0.386192	7.70833	16.6392	4.52062e-05	0.00104292	ENSMUSG00000022376	-1.31877	2.021	12.9466	0.000320495	0.00756451	ENSMUSG00000047728	-0.338953	5.83456	15.5219	8.15551e-05	0.00198792	ENSMUSG00000079495	-1.40633	4.03279	12.05	0.000517928	0.0127663	ENSMUSG00000015656	-0.907645
ENSMUSG00000034557	-0.170426	6.77848	14.5756	0.000134646	0.00346994	ENSMUSG00000024660	-0.241097	4.15342	15.8231	6.95494e-05	0.00181971							ENSMUSG00000001774	0.60421	5.61373	10.7795	0.00102632	0.0252715	ENSMUSG00000014303	0.432285	4.01676	16.6286	4.54596e-05	0.00104436	ENSMUSG00000027996	-0.746974	2.71691	12.9161	0.000325775	0.00766647	ENSMUSG00000024026	0.505295	6.93175	15.5144	8.1881e-05	0.00199037	ENSMUSG00000027342	0.359293	4.22896	12.023	0.000525477	0.0129285	ENSMUSG00000020541	-0.435334
ENSMUSG00000042507	-0.205362	5.20213	14.574	0.000134764	0.00346994	ENSMUSG00000027078	-0.80718	2.00828	15.8063	7.01691e-05	0.00183248							ENSMUSG00000002289	1.79584	5.30826	10.7756	0.00102846	0.0252715	ENSMUSG00000042650	0.258959	7.52551	16.6253	4.55393e-05	0.00104436	ENSMUSG00000026605	1.48394	5.18963	12.9147	0.000326016	0.00766647	ENSMUSG00000043183	-0.693335	3.52828	15.5126	8.19574e-05	0.00199037	ENSMUSG00000026553	-0.177567	7.81392	12.0015	0.000531577	0.0130545	ENSMUSG00000024942	0.416726
ENSMUSG00000044791	-0.195064	6.5166	14.5737	0.000134784	0.00346994	ENSMUSG00000024981	0.247371	5.58429	15.8029	7.0296e-05	0.00183248							ENSMUSG00000073096	-0.3915	3.03891	10.7738	0.00102948	0.0252715	ENSMUSG00000030061	-0.294344	6.06746	16.6243	4.55646e-05	0.00104436	ENSMUSG00000037946	-1.00261	2.0953	12.9067	0.00032741	0.00768511	ENSMUSG00000052144	-0.322478	5.55647	15.4971	8.26316e-05	0.00200306	ENSMUSG00000020072	0.997933	4.6439	11.9711	0.000540319	0.0132293	ENSMUSG00000004069	-0.382206
ENSMUSG00000033386	0.885394	0.841946	14.5688	0.000135131	0.00347248	ENSMUSG00000034177	-0.549612	2.40033	15.7969	7.05185e-05	0.00183314							ENSMUSG00000024293	0.520597	4.88728	10.7689	0.00103219	0.0252915	ENSMUSG00000025269	-1.00369	2.8187	16.6226	4.56035e-05	0.00104436	ENSMUSG00000065999	2.87665	1.37824	12.8811	0.000331922	0.00777673	ENSMUSG00000048249	-0.278759	6.22854	15.4572	8.43964e-05	0.00204049	ENSMUSG00000067925	0.541973	3.14354	11.9699	0.000540679	0.0132293	ENSMUSG00000030399	-2.76418
ENSMUSG00000022216	0.252708	4.82391	14.5552	0.000136112	0.0034913	ENSMUSG00000018537	-0.325983	5.45582	15.7945	7.06074e-05	0.00183314							ENSMUSG00000048351	-0.451903	4.71786	10.743	0.00104677	0.0255783	ENSMUSG00000031762	-1.3181	2.4776	16.6153	4.578e-05	0.00104491	ENSMUSG00000034432	0.212273	6.27735	12.8504	0.000337404	0.00789068	ENSMUSG00000019996	-0.369916	7.89793	15.4523	8.46141e-05	0.00204049	ENSMUSG00000022351	0.489902	6.88362	11.9594	0.000543733	0.0132796	ENSMUSG00000032456	0.849185
ENSMUSG00000019795	0.165646	7.17128	14.5361	0.000137501	0.00352048	ENSMUSG00000051910	0.374329	4.63522	15.7918	7.07093e-05	0.00183314							ENSMUSG00000039308	-0.294531	4.9765	10.7396	0.0010487	0.0255783	ENSMUSG00000041688	-0.857733	3.19436	16.6121	4.5857e-05	0.00104491	ENSMUSG00000020598	-1.00766	0.0127286	12.8344	0.000340296	0.00794376	ENSMUSG00000056952	-0.265733	5.95527	15.4493	8.4748e-05	0.00204049	ENSMUSG00000024949	-0.183385	7.37689	11.9447	0.000548024	0.0133421	ENSMUSG00000018774	0.858264
ENSMUSG00000103749	0.779913	3.33649	14.4892	0.000140963	0.00360253	ENSMUSG00000020003	0.341166	4.43544	15.7753	7.13281e-05	0.00184581							ENSMUSG00000110277	0.5986	4.29168	10.7379	0.00104964	0.0255783	ENSMUSG00000021764	-0.278349	7.23925	16.6102	4.59027e-05	0.00104491	ENSMUSG00000021665	-0.608564	4.44076	12.8309	0.00034095	0.00794452	ENSMUSG00000002032	-0.538711	6.78026	15.4483	8.47949e-05	0.00204049	ENSMUSG00000022545	-0.342415	4.91904	11.9438	0.000548291	0.0133421	ENSMUSG00000027808	-0.425711
ENSMUSG00000028645	-0.311652	6.80018	14.4777	0.000141825	0.00361796	ENSMUSG00000020321	0.115508	9.1181	15.7094	7.38581e-05	0.0019078							ENSMUSG00000008384	0.378916	4.91312	10.7209	0.00105931	0.0257669	ENSMUSG00000038880	0.370656	5.02031	16.6078	4.59622e-05	0.00104491	ENSMUSG00000070691	-0.839047	0.657707	12.8076	0.000345207	0.00802906	ENSMUSG00000053436	-0.381838	7.42909	15.425	8.58433e-05	0.00206015	ENSMUSG00000073888	0.756802	2.14966	11.9245	0.000554007	0.0134566	ENSMUSG00000037103	0.44307
ENSMUSG00000022507	-0.261112	6.15666	14.4408	0.000144636	0.00368296	ENSMUSG00000029070	-0.39036	3.69468	15.6957	7.43932e-05	0.00191813							ENSMUSG00000037336	0.95182	2.61405	10.6951	0.00107418	0.0260811	ENSMUSG00000000563	-0.240085	9.98405	16.5914	4.63611e-05	0.00105206	ENSMUSG00000026483	-0.441671	5.05251	12.7824	0.000349893	0.00811829	ENSMUSG00000028480	0.986478	1.04429	15.4233	8.59244e-05	0.00206015	ENSMUSG00000036057	-0.236373	6.27558	11.9186	0.000555772	0.0134619	ENSMUSG00000075256	-0.954668
ENSMUSG00000020021	-0.34125	4.3276	14.4366	0.000144961	0.00368453	ENSMUSG00000051223	0.163835	7.33977	15.6902	7.46098e-05	0.00192022							ENSMUSG00000032615	-0.377928	4.06488	10.6546	0.00109798	0.0266107	ENSMUSG00000028383	0.388419	8.14632	16.5879	4.64464e-05	0.00105208	ENSMUSG00000027238	0.620269	6.98344	12.779	0.000350541	0.00811829	ENSMUSG00000058620	-0.774806	7.23583	15.3993	8.70184e-05	0.0020826	ENSMUSG00000031375	0.292987	7.6	11.917	0.000556242	0.0134619	ENSMUSG00000027162	-0.395648
ENSMUSG00000054000	0.558548	3.10342	14.4141	0.000146703	0.00372207	ENSMUSG00000008200	-0.259875	6.01717	15.6727	7.53032e-05	0.00193452							ENSMUSG00000095105	-1.18105	1.55033	10.6458	0.00110321	0.0266889	ENSMUSG00000026114	-1.03884	0.920477	16.5772	4.67083e-05	0.00105429	ENSMUSG00000026484	0.328493	4.21011	12.7768	0.000350951	0.00811829	ENSMUSG00000032596	0.524555	3.63226	15.3765	8.80757e-05	0.00210408	ENSMUSG00000033308	-0.560283	6.48632	11.8992	0.000561589	0.0135666	ENSMUSG00000038806	-0.319568
ENSMUSG00000020653	0.368878	3.40494	14.3848	0.000149001	0.00377351	ENSMUSG00000003200	-0.228333	5.43924	15.6693	7.54382e-05	0.00193452							ENSMUSG00000019528	0.379971	4.0078	10.6382	0.00110775	0.0267503	ENSMUSG00000027677	-0.455262	5.39838	16.577	4.6713e-05	0.00105429	ENSMUSG00000038984	0.95532	3.39787	12.7513	0.000355755	0.00821453	ENSMUSG00000035585	0.280601	5.7638	15.3683	8.84577e-05	0.00210939	ENSMUSG00000043398	1.23852	2.61187	11.8762	0.000568556	0.0137093	ENSMUSG00000063049	0.506852
ENSMUSG00000035161	-0.21804	5.0739	14.3705	0.000150133	0.00379534	ENSMUSG00000035047	-0.24321	4.08809	15.6041	7.80845e-05	0.00199877							ENSMUSG00000005674	-0.608619	3.08157	10.6066	0.00112682	0.0271338	ENSMUSG00000008683	-0.293446	6.787	16.5559	4.7238e-05	0.00106422	ENSMUSG00000007033	-0.782939	1.0125	12.7314	0.000359558	0.00828737	ENSMUSG00000027944	-0.270295	6.13483	15.3623	8.87413e-05	0.00211169	ENSMUSG00000039206	-0.335147	3.87529	11.8729	0.000569552	0.0137093	ENSMUSG00000073888	0.621819
ENSMUSG00000041891	-0.194643	5.67694	14.3659	0.000150504	0.00379786	ENSMUSG00000038119	-0.442434	4.58484	15.5966	7.83942e-05	0.00200198							ENSMUSG00000026921	-0.532898	3.55114	10.602	0.00112965	0.0271338	ENSMUSG00000034889	0.297762	4.94184	16.5465	4.74721e-05	0.00106757	ENSMUSG00000044350	-0.859845	2.78635	12.7277	0.000360273	0.00828888	ENSMUSG00000036622	0.324238	5.44513	15.3595	8.88744e-05	0.00211169	ENSMUSG00000020009	0.316453	5.02839	11.8592	0.000573787	0.0137856	ENSMUSG00000037364	0.290283
ENSMUSG00000002910	-0.485573	4.02152	14.3533	0.000151513	0.00380943	ENSMUSG00000047787	0.269827	5.2334	15.5943	7.84926e-05	0.00200198							ENSMUSG00000044550	1.01385	0.601447	10.6019	0.00112973	0.0271338	ENSMUSG00000059852	0.26292	7.62835	16.5401	4.76321e-05	0.00106924	ENSMUSG00000022620	-0.259898	4.73977	12.6953	0.000366577	0.00841585	ENSMUSG00000079293	1.13587	1.00391	15.3503	8.93087e-05	0.00211819	ENSMUSG00000007950	0.364933	4.56885	11.8559	0.000574788	0.0137856	ENSMUSG00000039361	-0.303089
ENSMUSG00000005510	0.179425	6.29633	14.3503	0.000151753	0.00380943	ENSMUSG00000047675	0.20054	7.12682	15.5598	7.99346e-05	0.0020351							ENSMUSG00000042312	0.486222	2.85097	10.5925	0.00113545	0.0272224	ENSMUSG00000028419	-0.306957	5.31677	16.5272	4.79565e-05	0.00107459	ENSMUSG00000020964	-0.174408	6.57683	12.6926	0.00036711	0.00841585	ENSMUSG00000041515	0.625584	3.89061	15.3428	8.96607e-05	0.00211916	ENSMUSG00000102252	0.397776	3.68223	11.8347	0.000581367	0.0139184	ENSMUSG00000031400	0.573375
ENSMUSG00000023391	0.658808	3.41925	14.35	0.000151779	0.00380943	ENSMUSG00000055022	0.159423	8.96431	15.5557	8.01092e-05	0.00203589							ENSMUSG00000087141	0.539131	4.49431	10.5769	0.00114509	0.0274041	ENSMUSG00000029231	0.562248	5.73899	16.5151	4.8265e-05	0.00107956	ENSMUSG00000002279	0.228425	4.93386	12.6756	0.000370449	0.00846209	ENSMUSG00000004364	-0.246739	7.26263	15.3426	8.96708e-05	0.00211916	ENSMUSG00000040006	0.226263	6.10443	11.8296	0.000582952	0.0139313	ENSMUSG00000020268	-0.533445
ENSMUSG00000034675	0.207219	7.99063	14.3445	0.000152221	0.00381369	ENSMUSG00000026667	0.156987	8.30577	15.5494	8.03792e-05	0.0020378							ENSMUSG00000022545	-0.389783	4.29269	10.5694	0.00114977	0.027467	ENSMUSG00000032649	0.51461	3.70935	16.5093	4.84108e-05	0.00108089	ENSMUSG00000002032	-0.371983	4.39943	12.6756	0.000370453	0.00846209	ENSMUSG00000059540	0.488012	2.3708	15.3287	9.03344e-05	0.00213102	ENSMUSG00000020211	-0.214868	4.91053	11.8205	0.000585813	0.0139531	ENSMUSG00000022177	-0.398141
ENSMUSG00000008496	0.348917	3.89825	14.3399	0.0001526	0.00381636	ENSMUSG00000002900	-0.249499	5.19062	15.5472	8.04716e-05	0.0020378							ENSMUSG00000030805	-0.332519	6.16606	10.5492	0.00116236	0.0276781	ENSMUSG00000042632	0.414841	3.68192	16.483	4.90882e-05	0.00109405	ENSMUSG00000023367	-0.770309	4.21582	12.6537	0.000374814	0.00854643	ENSMUSG00000025189	-0.55696	4.9058	15.3231	9.06039e-05	0.00213356	ENSMUSG00000029500	-0.2583	4.9313	11.8201	0.000585957	0.0139531	ENSMUSG00000034248	-0.496463
ENSMUSG00000045763	0.347959	9.08001	14.3257	0.000153754	0.00383838	ENSMUSG00000109901	-0.29703	3.83647	15.5431	8.06441e-05	0.00203853							ENSMUSG00000021719	0.760989	3.51225	10.5486	0.00116275	0.0276781	ENSMUSG00000025902	-0.495742	4.29011	16.46	4.96867e-05	0.00110542	ENSMUSG00000064363	0.414027	13.2031	12.6392	0.000377744	0.00859788	ENSMUSG00000004069	-0.266914	7.35399	15.3162	9.09311e-05	0.00213745	ENSMUSG00000034295	-0.29117	6.00975	11.8119	0.000588536	0.0139895	ENSMUSG00000034083	0.43957
ENSMUSG00000026924	-0.216311	6.43474	14.3184	0.000154347	0.00384631	ENSMUSG00000038212	0.168749	5.86517	15.5392	8.08102e-05	0.00203909							ENSMUSG00000044037	-0.341486	5.65588	10.5418	0.00116702	0.0277302	ENSMUSG00000020453	0.326711	4.81781	16.454	4.98456e-05	0.00110665	ENSMUSG00000024965	-0.794954	3.39413	12.6329	0.00037902	0.00861158	ENSMUSG00000032841	0.595648	2.92897	15.2985	9.17886e-05	0.00215376	ENSMUSG00000036432	0.354582	5.02632	11.7989	0.000592672	0.0140628	ENSMUSG00000022032	-2.09444
ENSMUSG00000097929	-0.334105	4.91699	14.2855	0.000157071	0.0039046	ENSMUSG00000052512	-0.232531	6.7802	15.527	8.13372e-05	0.00204874							ENSMUSG00000027474	-0.757655	1.4579	10.5334	0.00117239	0.0278084	ENSMUSG00000075376	-0.28966	5.70275	16.4512	4.99195e-05	0.00110665	ENSMUSG00000062901	0.262964	8.47847	12.6274	0.000380128	0.0086214	ENSMUSG00000000957	0.596753	3.44288	15.2753	9.29225e-05	0.0021765	ENSMUSG00000031628	-0.324484	4.26766	11.784	0.000597413	0.0141501	ENSMUSG00000046879	0.806156
ENSMUSG00000001630	-0.21621	5.06097	14.2834	0.000157243	0.0039046	ENSMUSG00000039202	0.224629	7.40118	15.5134	8.19229e-05	0.00205984							ENSMUSG00000041479	-0.603561	2.00238	10.5012	0.00119294	0.0282457	ENSMUSG00000030629	-0.337862	6.14267	16.3822	5.17686e-05	0.00114407	ENSMUSG00000029352	1.21784	0.454972	12.6052	0.000384684	0.00870927	ENSMUSG00000033557	-0.260719	7.17352	15.2718	9.30967e-05	0.00217671	ENSMUSG00000036904	-0.401638	4.77196	11.7735	0.000600789	0.0141996	ENSMUSG00000020717	0.524822
ENSMUSG00000020638	0.268148	4.89239	14.2549	0.000159642	0.00395714	ENSMUSG00000021518	0.188032	6.25622	15.5096	8.20893e-05	0.00206037							ENSMUSG00000036902	1.17866	2.0048	10.4965	0.001196	0.028268	ENSMUSG00000033684	-0.3369	5.3346	16.3803	5.18204e-05	0.00114407	ENSMUSG00000040485	-1.00904	1.55125	12.5892	0.000387989	0.00876856	ENSMUSG00000026383	-0.277417	6.85589	15.2656	9.34008e-05	0.00217996	ENSMUSG00000040225	-0.27485	7.35296	11.7709	0.000601634	0.0141996	ENSMUSG00000026475	-2.06592
ENSMUSG00000028137	0.262332	7.33129	14.2511	0.00015997	0.00395828	ENSMUSG00000042626	-0.312728	4.09101	15.4866	8.30905e-05	0.00208181							ENSMUSG00000062075	-0.410413	5.83671	10.4926	0.00119854	0.0282778	ENSMUSG00000024583	-0.275966	6.31457	16.3781	5.18824e-05	0.00114407	ENSMUSG00000031631	0.321256	4.34634	12.5563	0.000394869	0.00889299	ENSMUSG00000027635	0.690166	1.94634	15.2493	9.42103e-05	0.00219497	ENSMUSG00000027716	0.993589	0.336184	11.7673	0.00060279	0.0142018	ENSMUSG00000022828	-0.347169
ENSMUSG00000025735	0.505714	2.58216	14.2436	0.000160604	0.00396089	ENSMUSG00000037188	0.930562	0.642115	15.4822	8.32879e-05	0.00208308							ENSMUSG00000047415	-0.645184	2.43545	10.4856	0.00120309	0.0283353	ENSMUSG00000027180	-0.265043	6.52566	16.3676	5.21683e-05	0.00114835	ENSMUSG00000001098	-0.244137	5.21086	12.5562	0.000394888	0.00889299	ENSMUSG00000021595	-0.241793	6.15636	15.2389	9.47299e-05	0.00220318	ENSMUSG00000020305	0.368385	2.60622	11.7632	0.000604143	0.0142086	ENSMUSG00000066233	0.716479
ENSMUSG00000026004	-0.39049	3.48762	14.2432	0.000160641	0.00396089	ENSMUSG00000002108	-0.693022	2.27848	15.4337	8.54501e-05	0.00213339							ENSMUSG00000009585	0.867894	4.01424	10.4811	0.00120599	0.0283536	ENSMUSG00000062515	-0.314623	8.58214	16.3551	5.25147e-05	0.00115204	ENSMUSG00000027999	0.427592	5.26721	12.5335	0.000399726	0.00897995	ENSMUSG00000037138	-0.921794	1.91113	15.2328	9.50376e-05	0.00220645	ENSMUSG00000052373	-0.571411	1.91453	11.7457	0.000609848	0.0143172	ENSMUSG00000049625	0.802922
ENSMUSG00000026224	0.705692	1.29837	14.227	0.000162032	0.00398816	ENSMUSG00000071862	0.304633	5.9669	15.421	8.60279e-05	0.00214404							ENSMUSG00000029560	0.82578	3.63802	10.466	0.00121594	0.0285181	ENSMUSG00000028999	-0.384448	4.30084	16.3549	5.25208e-05	0.00115204	ENSMUSG00000030057	0.224426	8.19493	12.5315	0.000400156	0.00897995	ENSMUSG00000041695	1.39323	4.81745	15.2255	9.54078e-05	0.00221115	ENSMUSG00000002076	-0.717141	3.48044	11.7424	0.000610918	0.0143172	ENSMUSG00000026348	-0.995065
ENSMUSG00000072946	-0.490834	4.42291	14.2059	0.000163852	0.00402586	ENSMUSG00000016018	0.165351	6.05967	15.4118	8.64468e-05	0.00214496							ENSMUSG00000032577	0.462662	4.73374	10.464	0.00121726	0.0285181	ENSMUSG00000049537	-0.656117	6.38022	16.344	5.28238e-05	0.00115666	ENSMUSG00000041632	-0.293447	5.11393	12.5274	0.00040102	0.00898354	ENSMUSG00000027193	-0.224939	6.42451	15.2212	9.56228e-05	0.00221195	ENSMUSG00000027513	0.85209	10.8303	11.7392	0.000611982	0.0143172	ENSMUSG00000071302	-0.704557
ENSMUSG00000071645	-0.300207	4.73017	14.192	0.000165067	0.00404861	ENSMUSG00000054676	0.238409	4.65705	15.4109	8.64861e-05	0.00214496							ENSMUSG00000028552	0.282085	6.27659	10.4474	0.00122823	0.0287246	ENSMUSG00000022019	-0.394099	4.9471	16.2863	5.44561e-05	0.00119031	ENSMUSG00000037364	-0.211111	6.2842	12.5154	0.000403601	0.00902553	ENSMUSG00000026896	0.732883	3.40732	15.2182	9.57778e-05	0.00221195	ENSMUSG00000026238	0.230684	8.63661	11.7137	0.000620404	0.0144835	ENSMUSG00000051817	0.651142
ENSMUSG00000070436	-0.346264	4.28275	14.1667	0.000167302	0.00409626	ENSMUSG00000057672	-0.201492	5.42461	15.4102	8.65186e-05	0.00214496							ENSMUSG00000026707	-0.445259	2.59756	10.4379	0.00123459	0.0288223	ENSMUSG00000027199	1.01198	3.10113	16.233	5.60089e-05	0.00122211	ENSMUSG00000020022	0.191311	7.36973	12.4813	0.000411046	0.00913672	ENSMUSG00000030272	0.527916	5.0375	15.2086	9.62658e-05	0.00221933	ENSMUSG00000071573	-0.569291	2.09509	11.7048	0.000623401	0.0144835	ENSMUSG00000032557	-0.352613
ENSMUSG00000024298	-0.298712	6.83499	14.15	0.000168797	0.00412506	ENSMUSG00000022000	-0.158458	6.5963	15.4042	8.67971e-05	0.00214811							ENSMUSG00000071359	0.360856	4.27284	10.4339	0.00123721	0.0288223	ENSMUSG00000045761	-1.60928	3.63338	16.2251	5.62432e-05	0.00122508	ENSMUSG00000067873	0.1973	6.6069	12.4811	0.000411081	0.00913672	ENSMUSG00000048756	-0.700426	6.98379	15.1979	9.68097e-05	0.00222607	ENSMUSG00000042515	0.903209	0.920253	11.7033	0.000623895	0.0144835	ENSMUSG00000035671	0.435074
ENSMUSG00000098488	-0.977116	0.268392	14.1469	0.000169075	0.00412506	ENSMUSG00000005682	-0.456786	5.32661	15.3711	8.83297e-05	0.00218104							ENSMUSG00000049076	0.36429	6.42583	10.4313	0.00123898	0.0288223	ENSMUSG00000032024	1.01852	3.36679	16.212	5.66334e-05	0.00123143	ENSMUSG00000029096	-0.39141	7.2357	12.4794	0.000411466	0.00913672	ENSMUSG00000022679	-0.723102	9.55687	15.1962	9.68958e-05	0.00222607	ENSMUSG00000022194	-0.28646	6.02632	11.7005	0.000624845	0.0144835	ENSMUSG00000040061	0.951834
ENSMUSG00000092074	0.780896	1.78552	14.1437	0.000169362	0.00412506	ENSMUSG00000040054	-0.218178	6.71089	15.3688	8.84351e-05	0.00218104							ENSMUSG00000027835	0.387242	5.64935	10.4282	0.00124104	0.0288223	ENSMUSG00000029163	0.481104	5.23881	16.1888	5.73328e-05	0.00124447	ENSMUSG00000078787	1.2179	0.34069	12.4776	0.000411868	0.00913672	ENSMUSG00000026873	-0.963085	1.68185	15.166	9.84582e-05	0.00225387	ENSMUSG00000024529	0.548815	3.05104	11.6999	0.000625048	0.0144835	ENSMUSG00000041515	0.644306
ENSMUSG00000049516	-0.330928	4.62266	14.1358	0.000170072	0.00413517	ENSMUSG00000028961	-0.244059	5.3782	15.3252	9.05004e-05	0.0022281							ENSMUSG00000036912	-0.790182	1.10925	10.4224	0.00124493	0.0288256	ENSMUSG00000028559	-0.280138	6.70582	16.1649	5.80601e-05	0.00125806	ENSMUSG00000031601	0.316475	5.54785	12.4763	0.000412151	0.00913672	ENSMUSG00000022401	-0.322739	5.0302	15.1651	9.85081e-05	0.00225387	ENSMUSG00000038690	0.261999	7.56391	11.6982	0.000625611	0.0144835	ENSMUSG00000028456	-1.17081
ENSMUSG00000036578	0.18561	5.54684	14.1285	0.000170735	0.00414409	ENSMUSG00000031503	-0.381736	6.49758	15.3035	9.15456e-05	0.00224993							ENSMUSG00000035781	-0.347039	5.80863	10.4192	0.00124709	0.0288256	ENSMUSG00000028691	-0.273113	7.89446	16.1591	5.82375e-05	0.00125806	ENSMUSG00000029048	0.185902	5.59606	12.4567	0.00041649	0.00921691	ENSMUSG00000056698	0.528429	4.51686	15.1601	9.87706e-05	0.00225387	ENSMUSG00000032083	-0.967949	1.13724	11.6825	0.000630906	0.0145808	ENSMUSG00000037262	0.54752
ENSMUSG00000028955	-0.261234	4.75753	14.1186	0.000171641	0.00415889	ENSMUSG00000032745	0.172812	5.96342	15.2732	9.30288e-05	0.00228242							ENSMUSG00000039252	0.823712	2.56311	10.4184	0.00124766	0.0288256	ENSMUSG00000062604	-0.261575	5.74421	16.1583	5.82615e-05	0.00125806	ENSMUSG00000028218	0.307676	3.70528	12.4417	0.000419857	0.00927536	ENSMUSG00000063142	0.770212	2.56489	15.1583	9.88637e-05	0.00225387	ENSMUSG00000026368	-0.480068	6.58217	11.6638	0.000637272	0.0147025	ENSMUSG00000054676	0.865052
ENSMUSG00000021136	0.353664	4.04757	14.1094	0.000172477	0.00417192	ENSMUSG00000044712	-0.381959	2.83851	15.2527	9.40423e-05	0.00230331							ENSMUSG00000074698	0.390317	7.58608	10.4083	0.00125449	0.0289333	ENSMUSG00000037029	-0.269207	4.90543	16.1424	5.87537e-05	0.0012665	ENSMUSG00000025785	0.33507	4.12895	12.4158	0.000425722	0.00938868	ENSMUSG00000117975	-0.662765	4.15399	15.1564	9.89604e-05	0.00225387	ENSMUSG00000025359	0.939986	0.262584	11.6597	0.0006387	0.01471	ENSMUSG00000021192	-0.346831
ENSMUSG00000035238	1.03103	0.499911	14.0901	0.000174259	0.00420776	ENSMUSG00000027660	0.20895	6.34962	15.2434	9.45089e-05	0.00231074							ENSMUSG00000042532	-0.762917	0.808365	10.4042	0.00125731	0.0289485	ENSMUSG00000008892	-0.267667	8.03045	16.1379	5.88943e-05	0.00126734	ENSMUSG00000003134	-0.29659	3.83365	12.4077	0.000427559	0.00940019	ENSMUSG00000039899	0.834944	2.45	15.1489	9.93552e-05	0.00225896	ENSMUSG00000031778	0.28482	6.26528	11.6556	0.000640105	0.0147169	ENSMUSG00000045817	0.517607
ENSMUSG00000024528	-0.270211	4.02991	14.0851	0.000174719	0.0042106	ENSMUSG00000031169	-0.306051	6.43267	15.233	9.50307e-05	0.0023195							ENSMUSG00000006651	0.564576	6.27356	10.3991	0.00126075	0.0289777	ENSMUSG00000019689	0.346967	5.95276	16.118	5.95144e-05	0.0012784	ENSMUSG00000032615	-0.262722	4.50241	12.407	0.000427716	0.00940019	ENSMUSG00000025369	0.29983	7.31401	15.1397	9.98425e-05	0.00226613	ENSMUSG00000063882	0.251394	7.43325	11.64	0.000645501	0.0148154	ENSMUSG00000028796	0.452604
ENSMUSG00000033257	-0.294398	5.08747	14.0822	0.000174988	0.0042106	ENSMUSG00000015970	0.646032	2.41317	15.1834	9.75576e-05	0.00237709							ENSMUSG00000047412	0.492997	5.08616	10.3891	0.0012676	0.0290851	ENSMUSG00000022370	-0.312992	5.66793	16.1149	5.96128e-05	0.0012784	ENSMUSG00000058454	0.615785	3.32491	12.3971	0.00043001	0.00941833	ENSMUSG00000028955	-0.303454	5.71872	15.1292	0.000100399	0.00227	ENSMUSG00000032667	-0.432141	4.28918	11.6236	0.000651208	0.0149207	ENSMUSG00000033220	0.917377
ENSMUSG00000025817	-0.237956	4.12891	14.0791	0.000175279	0.0042106	ENSMUSG00000022426	0.179491	6.24493	15.1764	9.79211e-05	0.00238185							ENSMUSG00000048897	-0.292291	6.10182	10.3845	0.00127079	0.029107	ENSMUSG00000057367	-0.314916	4.82432	16.1083	5.98204e-05	0.00127851	ENSMUSG00000050860	-0.272295	3.97486	12.3955	0.000430378	0.00941833	ENSMUSG00000023272	-0.466449	4.72747	15.1275	0.000100491	0.00227	ENSMUSG00000040697	-0.228133	5.83524	11.6083	0.000656579	0.015018	ENSMUSG00000025647	0.466036
ENSMUSG00000066705	0.189066	6.66933	14.0691	0.000176211	0.00422575	ENSMUSG00000014349	0.126718	6.71915	15.1724	9.81252e-05	0.00238273							ENSMUSG00000015112	-0.480445	5.10205	10.3814	0.00127291	0.029107	ENSMUSG00000014905	-0.353656	5.61505	16.1083	5.98228e-05	0.00127851	ENSMUSG00000005125	-0.355198	5.48057	12.3938	0.000430755	0.00941833	ENSMUSG00000071660	-0.410802	4.90794	15.1255	0.000100598	0.00227	ENSMUSG00000017404	0.21571	7.52652	11.605	0.000657739	0.0150187	ENSMUSG00000048581	0.683224
ENSMUSG00000090223	0.193095	5.49355	14.0611	0.00017697	0.00423669	ENSMUSG00000044071	0.297895	5.98518	15.158	9.888e-05	0.00239695							ENSMUSG00000031788	-0.344242	5.57119	10.3748	0.0012775	0.0291619	ENSMUSG00000031537	-0.261218	5.38634	16.0889	6.0436e-05	0.0012894	ENSMUSG00000018548	0.304109	4.12095	12.388	0.000432101	0.00943161	ENSMUSG00000034570	0.35438	5.1837	15.1235	0.000100702	0.00227	ENSMUSG00000091811	0.465731	4.14007	11.5982	0.000660174	0.0150486	ENSMUSG00000031278	-0.668643
ENSMUSG00000025323	-0.278288	4.92502	14.0571	0.000177347	0.00423847	ENSMUSG00000025188	-0.515858	4.38753	15.1453	9.95457e-05	0.00240875							ENSMUSG00000025531	0.446767	4.45526	10.3706	0.00128041	0.0291785	ENSMUSG00000040253	0.777903	4.10468	16.0116	6.29572e-05	0.0013409	ENSMUSG00000024247	-0.398335	5.73964	12.3812	0.000433685	0.00945004	ENSMUSG00000026864	-0.440657	8.58163	15.1119	0.00010132	0.00228005	ENSMUSG00000016757	0.566609	5.05722	11.5902	0.000663002	0.0150873	ENSMUSG00000058690	-0.372668
ENSMUSG00000031492	0.666608	2.29177	14.037	0.000179245	0.00427653	ENSMUSG00000004565	-0.180517	6.68063	15.1423	9.97064e-05	0.00240875							ENSMUSG00000069020	-0.30823	4.70695	10.3362	0.00130444	0.029629	ENSMUSG00000074405	0.303323	4.80657	16.0052	6.31699e-05	0.00134314	ENSMUSG00000034566	0.284308	9.46127	12.3743	0.000435291	0.00946887	ENSMUSG00000031714	-0.279509	5.6354	15.1011	0.000101902	0.00228923	ENSMUSG00000027751	-0.275184	5.55781	11.5763	0.000667995	0.015175	ENSMUSG00000027822	-0.431433
ENSMUSG00000032238	-0.395566	7.09036	14.0244	0.00018045	0.00429795	ENSMUSG00000030321	-0.439245	2.90947	15.1255	0.000100595	0.00242299							ENSMUSG00000023044	-0.360607	4.18173	10.3358	0.00130477	0.029629	ENSMUSG00000027007	-0.291482	5.52398	15.9853	6.38349e-05	0.00135497	ENSMUSG00000027188	-0.699491	1.97915	12.3693	0.000436452	0.00946938	ENSMUSG00000023019	-0.392352	9.32415	15.0897	0.000102519	0.00229919	ENSMUSG00000037999	0.404372	5.65295	11.5533	0.000676298	0.0153375	ENSMUSG00000049600	-0.555597
ENSMUSG00000037890	0.227591	5.03398	14.0007	0.000182739	0.004343	ENSMUSG00000040618	-0.210564	4.94279	15.1247	0.000100637	0.00242299							ENSMUSG00000041992	0.39366	4.3093	10.3328	0.00130683	0.029629	ENSMUSG00000021423	1.29071	1.4588	15.9672	6.44487e-05	0.00136359	ENSMUSG00000033953	0.231107	6.3201	12.3678	0.000436797	0.00946938	ENSMUSG00000005034	-0.279269	6.41843	15.0798	0.000103058	0.00230735	ENSMUSG00000023021	-0.353537	5.61807	11.5379	0.000681928	0.0154389	ENSMUSG00000105096	1.29046
ENSMUSG00000037747	0.150663	7.52548	13.9985	0.000182961	0.004343	ENSMUSG00000024210	1.10529	0.635551	15.1186	0.000100963	0.00242671							ENSMUSG00000051154	0.290513	4.89638	10.3291	0.00130946	0.0296382	ENSMUSG00000054387	-0.341213	6.20266	15.9654	6.45097e-05	0.00136359	ENSMUSG00000021918	-0.365318	3.33425	12.3482	0.000441417	0.00955332	ENSMUSG00000020577	-0.644029	4.51837	15.0576	0.000104282	0.00233078	ENSMUSG00000021185	0.48311	7.15357	11.5153	0.000690254	0.0156009	ENSMUSG00000039988	-0.343218
ENSMUSG00000022074	1.06862	1.33115	13.9933	0.000183465	0.00434759	ENSMUSG00000031805	-0.393951	3.87121	15.1001	0.00010196	0.00244652							ENSMUSG00000039741	-0.350589	5.40785	10.3213	0.00131506	0.0297146	ENSMUSG00000022793	-0.696774	3.19313	15.9637	6.45686e-05	0.00136359	ENSMUSG00000067369	0.453973	6.12332	12.336	0.0004443	0.00959943	ENSMUSG00000020057	0.449357	3.56393	15.0329	0.000105653	0.00235744	ENSMUSG00000016756	-0.370887	5.78107	11.5037	0.000694595	0.0156725	ENSMUSG00000036639	0.427884
ENSMUSG00000035914	0.334419	3.90811	13.9612	0.000186621	0.00441412	ENSMUSG00000005968	-0.551017	1.93434	15.0944	0.000102266	0.00244971							ENSMUSG00000079509	0.468506	4.98925	10.2925	0.00133574	0.0301309	ENSMUSG00000068606	2.43086	1.78933	15.9453	6.51994e-05	0.00137458	ENSMUSG00000022554	-0.388549	2.6916	12.3248	0.00044699	0.00964125	ENSMUSG00000011884	-0.297447	5.99663	15.0173	0.000106529	0.00236265	ENSMUSG00000028608	0.253036	4.34733	11.4595	0.000711292	0.0159973	ENSMUSG00000038141	1.08221
ENSMUSG00000096916	-0.374163	3.0295	13.9584	0.000186903	0.00441412	ENSMUSG00000028582	-0.275786	5.21928	15.0684	0.000103686	0.00247954							ENSMUSG00000015790	-0.352105	5.02208	10.2829	0.00134272	0.0302371	ENSMUSG00000030865	1.2604	1.07759	15.9369	6.54894e-05	0.00137837	ENSMUSG00000057672	-0.211022	5.62411	12.3201	0.000448099	0.00964346	ENSMUSG00000041642	0.836864	2.13949	15.017	0.000106546	0.00236265	ENSMUSG00000063320	0.386858	3.54233	11.4592	0.000711391	0.0159973	ENSMUSG00000039958	-0.90743
ENSMUSG00000047804	-0.239808	5.00484	13.9405	0.000188688	0.00444879	ENSMUSG00000036644	0.217959	7.86248	15.0651	0.000103866	0.00247968							ENSMUSG00000022686	1.08745	2.16322	10.2773	0.00134678	0.0302776	ENSMUSG00000020262	-0.394685	5.15831	15.928	6.57968e-05	0.00138251	ENSMUSG00000044676	0.421128	4.43514	12.318	0.000448603	0.00964346	ENSMUSG00000027397	-0.386685	5.21226	15.0166	0.00010657	0.00236265	ENSMUSG00000027223	0.348179	5.47773	11.4229	0.000725426	0.0162695	ENSMUSG00000052160	0.73977
ENSMUSG00000029136	-0.604473	1.45569	13.9228	0.00019047	0.00448325	ENSMUSG00000038633	0.175007	6.25025	15.0109	0.00010689	0.00254758							ENSMUSG00000011831	0.365804	4.80644	10.2524	0.00136503	0.0306364	ENSMUSG00000047213	-0.302407	6.44161	15.9103	6.64166e-05	0.00139319	ENSMUSG00000020473	-0.621699	5.1837	12.298	0.000453455	0.00973136	ENSMUSG00000062397	-0.369477	8.46434	15.016	0.000106603	0.00236265	ENSMUSG00000060176	-0.648881	1.45347	11.4216	0.000725937	0.0162695	ENSMUSG00000003531	0.47322
ENSMUSG00000026312	-0.295749	4.5392	13.9007	0.00019273	0.00452884	ENSMUSG00000037458	0.168192	7.01071	14.9957	0.000107756	0.00256391							ENSMUSG00000047909	-0.412456	5.57681	10.2468	0.00136919	0.0306782	ENSMUSG00000037098	0.29022	5.838	15.8716	6.77867e-05	0.00141954	ENSMUSG00000039001	0.220633	7.11005	12.2623	0.000462205	0.0099025	ENSMUSG00000015112	-0.382444	7.30744	15.0097	0.00010696	0.00236499	ENSMUSG00000023122	0.549636	7.74493	11.4156	0.000728316	0.0162955	ENSMUSG00000039221	-0.414381
ENSMUSG00000025933	0.307182	4.19075	13.876	0.000195273	0.00458091	ENSMUSG00000056917	-0.268674	4.22194	14.9916	0.000107991	0.00256519							ENSMUSG00000029166	-0.541993	5.00889	10.239	0.00137499	0.0307216	ENSMUSG00000053436	0.234853	6.43813	15.8607	6.81805e-05	0.00142539	ENSMUSG00000049755	0.217972	5.02094	12.257	0.000463506	0.00991375	ENSMUSG00000018999	-0.438888	7.38551	15.0078	0.000107068	0.00236499	ENSMUSG00000020372	0.203556	8.10972	11.4054	0.000732293	0.016357	ENSMUSG00000031370	0.376054
ENSMUSG00000035671	-0.219782	4.67722	13.8727	0.000195623	0.00458143	ENSMUSG00000049493	-0.333861	4.27842	14.983	0.000108485	0.00257262							ENSMUSG00000040722	-0.66647	6.58885	10.238	0.00137573	0.0307216	ENSMUSG00000064210	0.437256	5.01075	15.8121	6.99533e-05	0.00146001	ENSMUSG00000001333	-0.391907	4.64365	12.2486	0.000465612	0.00994213	ENSMUSG00000025538	0.433751	4.37435	15.0029	0.000107344	0.00236714	ENSMUSG00000029426	0.346383	5.8589	11.4015	0.000733839	0.0163641	ENSMUSG00000073940	-1.04698
ENSMUSG00000048787	-0.244783	4.42757	13.8423	0.00019881	0.0046483	ENSMUSG00000070002	-0.198976	5.07021	14.9511	0.000110334	0.00260564							ENSMUSG00000002731	0.42512	4.87374	10.2272	0.00138387	0.0308118	ENSMUSG00000079003	0.403679	4.375	15.8039	7.02579e-05	0.00146392	ENSMUSG00000118662	0.617248	2.6516	12.2249	0.00047156	0.0100523	ENSMUSG00000090486	-0.521808	7.40551	14.9875	0.000108225	0.00238239	ENSMUSG00000063558	-0.860589	2.25489	11.3963	0.000735925	0.0163832	ENSMUSG00000045930	0.48808
ENSMUSG00000032215	0.423737	4.19012	13.8258	0.000200568	0.00468158	ENSMUSG00000050248	0.623428	4.01125	14.9479	0.00011052	0.00260564							ENSMUSG00000056870	0.735604	1.99289	10.2242	0.00138614	0.0308118	ENSMUSG00000039294	-0.456075	3.63782	15.7769	7.12684e-05	0.0014825	ENSMUSG00000068040	-0.215196	5.82289	12.219	0.000473055	0.0100674	ENSMUSG00000032285	-0.52505	4.0525	14.9845	0.000108397	0.00238239	ENSMUSG00000053460	-0.311419	5.02265	11.3928	0.000737299	0.0163865	ENSMUSG00000059534	-0.334666
ENSMUSG00000056476	-0.284214	5.85725	13.8064	0.000202648	0.00472228	ENSMUSG00000057409	0.489816	2.22932	14.9468	0.000110584	0.00260564							ENSMUSG00000038451	-0.524812	4.48193	10.2217	0.00138797	0.0308118	ENSMUSG00000020272	0.440258	4.44149	15.7727	7.14253e-05	0.00148329	ENSMUSG00000019877	0.236877	8.06877	12.1976	0.000478498	0.0101663	ENSMUSG00000028436	-0.317648	6.48926	14.9773	0.000108814	0.00238757	ENSMUSG00000024677	1.09346	0.662309	11.3705	0.000746185	0.0165564	ENSMUSG00000027709	-0.287479
ENSMUSG00000020900	-0.141994	8.71012	13.8004	0.000203288	0.00472931	ENSMUSG00000039860	-0.306616	6.57329	14.9438	0.000110762	0.00260564							ENSMUSG00000025912	1.14814	2.02151	10.2193	0.00138976	0.0308118	ENSMUSG00000024063	0.416476	9.62462	15.7673	7.16311e-05	0.0014851	ENSMUSG00000027239	0.814449	1.28796	12.1896	0.000480564	0.0101813	ENSMUSG00000104445	0.607861	2.87202	14.9552	0.000110097	0.00240932	ENSMUSG00000056116	1.16077	4.58191	11.3614	0.000749875	0.0165877	ENSMUSG00000014226	-0.339223
ENSMUSG00000007812	-0.217988	5.05801	13.7923	0.00020417	0.00474196	ENSMUSG00000026837	-0.606642	4.852	14.9432	0.000110796	0.00260564							ENSMUSG00000071037	-0.530748	3.10047	10.2173	0.00139131	0.0308118	ENSMUSG00000025962	-0.312903	4.88433	15.7469	7.24077e-05	0.00149804	ENSMUSG00000046727	0.356144	5.07589	12.1877	0.000481065	0.0101813	ENSMUSG00000078570	0.413051	3.99209	14.9539	0.000110171	0.00240932	ENSMUSG00000005672	-0.491342	3.92603	11.355	0.000752448	0.0165877	ENSMUSG00000071369	-0.634503
ENSMUSG00000042606	-0.277058	4.82198	13.7693	0.000206687	0.00479248	ENSMUSG00000037434	0.236205	5.44959	14.9393	0.000111028	0.00260677							ENSMUSG00000043059	-0.34001	4.84695	10.2072	0.00139891	0.0309289	ENSMUSG00000039943	-0.410027	6.18905	15.7446	7.24953e-05	0.00149804	ENSMUSG00000057322	0.203289	6.17238	12.1856	0.000481596	0.0101813	ENSMUSG00000020805	-1.17824	1.23152	14.9289	0.000111641	0.00243744	ENSMUSG00000007836	-0.299657	7.43111	11.3545	0.000752672	0.0165877	ENSMUSG00000020805	-1.34053
ENSMUSG00000037578	-1.56256	1.38539	13.7649	0.000207172	0.00479578	ENSMUSG00000025314	0.245595	6.79878	14.9081	0.000112879	0.00263835							ENSMUSG00000022507	0.365597	6.12121	10.1927	0.00141001	0.0311227	ENSMUSG00000015340	1.01045	3.98895	15.7391	7.27049e-05	0.00149989	ENSMUSG00000027942	0.435184	3.58857	12.1745	0.000484465	0.010225	ENSMUSG00000003541	-0.703134	4.02647	14.9237	0.000111947	0.00244007	ENSMUSG00000057425	1.26521	6.07289	11.351	0.000754053	0.0165877	ENSMUSG00000034254	-0.475561
ENSMUSG00000038463	-0.40343	3.28687	13.7575	0.000207994	0.00480685	ENSMUSG00000036093	0.215875	6.32526	14.908	0.000112881	0.00263835							ENSMUSG00000024142	-0.336474	4.26003	10.1832	0.00141727	0.0312265	ENSMUSG00000040520	-0.410507	4.61022	15.7338	7.291e-05	0.00150163	ENSMUSG00000000489	-0.294914	5.8142	12.1676	0.000486279	0.0102464	ENSMUSG00000027173	-0.450494	5.19247	14.9152	0.000112456	0.00244279	ENSMUSG00000032098	-0.369681	7.63188	11.3489	0.000754921	0.0165877	ENSMUSG00000033174	-0.553875
ENSMUSG00000068154	0.452274	3.41619	13.7302	0.000211031	0.00486143	ENSMUSG00000006435	0.15112	7.44586	14.9072	0.000112931	0.00263835							ENSMUSG00000029641	-0.76966	1.30233	10.1748	0.00142375	0.0312265	ENSMUSG00000024806	-2.07047	3.02485	15.7292	7.30864e-05	0.00150279	ENSMUSG00000047342	1.13884	0.599444	12.1564	0.000489195	0.0102908	ENSMUSG00000038210	0.607153	1.59417	14.9136	0.000112547	0.00244279	ENSMUSG00000048216	1.5993	0.696483	11.3465	0.000755895	0.0165877	ENSMUSG00000058756	0.47104
ENSMUSG00000067889	-0.168517	9.95838	13.7301	0.00021105	0.00486143	ENSMUSG00000048489	1.40114	0.928093	14.9001	0.000113357	0.00264393							ENSMUSG00000047502	-1.35172	4.1123	10.1715	0.00142631	0.0312265	ENSMUSG00000042066	0.383658	5.81411	15.7251	7.3244e-05	0.00150355	ENSMUSG00000030806	-0.826141	1.43416	12.1529	0.000490121	0.0102933	ENSMUSG00000044221	-0.258392	7.58582	14.9116	0.000112667	0.00244279	ENSMUSG00000037364	-0.262021	6.7295	11.3453	0.000756411	0.0165877	ENSMUSG00000026655	-0.403084
ENSMUSG00000022025	-0.809563	0.778129	13.7212	0.000212048	0.00487641	ENSMUSG00000024906	-0.268308	4.98859	14.8913	0.000113885	0.00264796							ENSMUSG00000011257	-0.311383	6.13967	10.1708	0.00142681	0.0312265	ENSMUSG00000015672	-0.325431	4.63576	15.7172	7.35504e-05	0.00150634	ENSMUSG00000047141	0.327061	4.14935	12.1493	0.000491065	0.0102962	ENSMUSG00000020541	-0.296896	4.98272	14.9092	0.000112812	0.00244279	ENSMUSG00000035863	0.241087	7.28883	11.3425	0.000757549	0.0165877	ENSMUSG00000024101	0.342914
ENSMUSG00000047216	-0.54475	3.06608	13.7167	0.000212555	0.00488006	ENSMUSG00000022822	-0.170283	7.92843	14.891	0.000113903	0.00264796							ENSMUSG00000031808	-0.59753	4.58382	10.1703	0.00142717	0.0312265	ENSMUSG00000016833	-0.406053	3.49686	15.7117	7.3766e-05	0.00150634	ENSMUSG00000089901	1.63511	1.73814	12.1269	0.000497003	0.0104036	ENSMUSG00000026737	0.372332	3.87421	14.88	0.000114569	0.00246944	ENSMUSG00000113902	0.403202	5.24228	11.3113	0.000770381	0.016841	ENSMUSG00000029407	-0.398576
ENSMUSG00000027875	0.635857	3.07637	13.7096	0.000213357	0.00489045	ENSMUSG00000040389	0.15996	7.01839	14.8742	0.000114924	0.00266733							ENSMUSG00000029569	0.339545	4.26449	10.1683	0.00142874	0.0312265	ENSMUSG00000041846	-0.303068	5.20181	15.7096	7.38501e-05	0.00150634	ENSMUSG00000023348	0.36161	4.59277	12.1182	0.000499312	0.0104273	ENSMUSG00000024621	-0.389257	6.36202	14.8789	0.000114638	0.00246944	ENSMUSG00000022369	-0.396809	2.90301	11.3077	0.000771851	0.0168424	ENSMUSG00000037216	0.641759
ENSMUSG00000038664	-0.236856	8.10426	13.6921	0.000215364	0.00492793	ENSMUSG00000044807	0.25172	5.54914	14.8659	0.000115429	0.00267193							ENSMUSG00000053799	0.300451	5.30149	10.155	0.00143907	0.0314008	ENSMUSG00000068823	-0.243154	9.50078	15.7092	7.38626e-05	0.00150634	ENSMUSG00000032554	-0.84353	5.44332	12.1165	0.000499764	0.0104273	ENSMUSG00000038034	0.327957	4.48502	14.8742	0.000114926	0.00246944	ENSMUSG00000042178	-0.234585	5.04565	11.305	0.000772969	0.0168424	ENSMUSG00000079215	-0.241621
ENSMUSG00000053716	0.240749	6.39792	13.6892	0.000215696	0.00492793	ENSMUSG00000034723	0.20259	8.19859	14.8625	0.00011564	0.00267193							ENSMUSG00000002346	-0.354315	4.80289	10.1478	0.00144477	0.0314258	ENSMUSG00000030218	-0.454539	6.95128	15.6989	7.42684e-05	0.00151214	ENSMUSG00000022949	-1.46745	0.977986	12.1111	0.000501237	0.0104409	ENSMUSG00000029605	0.762498	1.76767	14.8714	0.000115093	0.00246944	ENSMUSG00000038764	-0.24982	6.28076	11.2887	0.000779785	0.0169632	ENSMUSG00000079017	2.22358
ENSMUSG00000046994	-0.319663	4.76819	13.6786	0.000216918	0.00494095	ENSMUSG00000034908	-0.163894	6.63973	14.8617	0.000115687	0.00267193							ENSMUSG00000023186	0.51683	5.31918	10.1449	0.00144703	0.0314258	ENSMUSG00000022403	-0.265081	6.98718	15.6909	7.45839e-05	0.00151609	ENSMUSG00000091712	-0.584482	2.72496	12.1001	0.000504181	0.0104852	ENSMUSG00000025085	-0.340359	7.02561	14.8674	0.000115342	0.00246944	ENSMUSG00000021211	0.641141	1.42098	11.2816	0.000782786	0.0170007	ENSMUSG00000034203	-0.526015
ENSMUSG00000015095	0.17169	6.41238	13.6699	0.000217922	0.00494095	ENSMUSG00000031673	0.204826	5.9267	14.85	0.00011641	0.00268424							ENSMUSG00000005373	-0.558639	8.14009	10.1446	0.00144727	0.0314258	ENSMUSG00000058454	0.570745	3.47506	15.6611	7.57662e-05	0.00153462	ENSMUSG00000054013	1.05881	2.61815	12.0935	0.000505988	0.0105056	ENSMUSG00000042426	-0.434235	5.07302	14.8669	0.000115372	0.00246944	ENSMUSG00000047821	-0.560154	2.71114	11.2573	0.000793122	0.0171972	ENSMUSG00000035851	-0.291868
ENSMUSG00000052748	-0.388066	3.34405	13.6686	0.000218074	0.00494095	ENSMUSG00000002908	0.273903	4.28335	14.8445	0.000116747	0.00268765							ENSMUSG00000003452	0.770051	1.91478	10.1359	0.00145412	0.0315231	ENSMUSG00000028427	0.500911	5.2577	15.6601	7.58086e-05	0.00153462	ENSMUSG00000026883	-0.227113	6.73403	12.0747	0.000511104	0.0105887	ENSMUSG00000031465	0.431754	3.9413	14.8664	0.000115398	0.00246944	ENSMUSG00000013033	0.403168	5.28949	11.2208	0.000808854	0.0175011	ENSMUSG00000025277	-0.54275
ENSMUSG00000027581	-0.131678	8.77	13.6673	0.000218221	0.00494095	ENSMUSG00000024382	-0.22294	4.94188	14.8378	0.000117164	0.00268866							ENSMUSG00000029165	-0.400715	3.54424	10.1296	0.0014591	0.0315799	ENSMUSG00000032562	0.268116	8.22992	15.6587	7.58641e-05	0.00153462	ENSMUSG00000054641	-0.742609	2.70852	12.0698	0.000512455	0.0105887	ENSMUSG00000026399	-0.592634	2.57265	14.8641	0.000115541	0.00246944	ENSMUSG00000028015	0.456235	5.05638	11.2187	0.000809763	0.0175011	ENSMUSG00000022234	-0.267028
ENSMUSG00000059518	0.284833	4.8612	13.6644	0.000218561	0.00494095	ENSMUSG00000031862	-0.17715	6.03997	14.8376	0.000117173	0.00268866							ENSMUSG00000024132	-0.458154	5.9544	10.1219	0.00146517	0.0316601	ENSMUSG00000056313	-0.612461	5.08338	15.6528	7.60987e-05	0.00153687	ENSMUSG00000052605	0.914923	1.78702	12.0697	0.000512475	0.0105887	ENSMUSG00000037531	-0.309861	4.13588	14.8538	0.000116174	0.00247894	ENSMUSG00000063851	-0.51938	5.75528	11.2148	0.000811458	0.017507	ENSMUSG00000039741	0.392707
ENSMUSG00000038205	-0.190845	5.73406	13.6643	0.000218574	0.00494095	ENSMUSG00000039539	0.740841	1.62624	14.8346	0.00011736	0.00268866							ENSMUSG00000070044	-1.05684	3.39957	10.1152	0.0014705	0.0317239	ENSMUSG00000028465	0.28641	7.75324	15.6366	7.67539e-05	0.0015476	ENSMUSG00000025794	0.200995	7.42079	12.0573	0.000515897	0.0106421	ENSMUSG00000052748	-0.558469	4.2973	14.8381	0.000117144	0.0024956	ENSMUSG00000037548	-1.43221	1.84206	11.2118	0.000812776	0.017507	ENSMUSG00000025939	-0.320523
ENSMUSG00000003226	-0.283825	7.28126	13.6629	0.000218735	0.00494095	ENSMUSG00000034160	-0.167806	8.57421	14.8213	0.000118195	0.00270024							ENSMUSG00000031647	0.903526	1.91849	10.1049	0.00147873	0.0318498	ENSMUSG00000030474	1.82432	1.68004	15.6311	7.6979e-05	0.00154861	ENSMUSG00000018559	0.194593	6.72246	12.0504	0.000517807	0.0106631	ENSMUSG00000089687	1.03575	0.411449	14.8124	0.000118751	0.00252575	ENSMUSG00000031145	-0.428169	3.50775	11.2091	0.000813976	0.017507	ENSMUSG00000028035	-0.631468
ENSMUSG00000045665	0.190774	5.12624	13.6442	0.00022092	0.00498226	ENSMUSG00000028176	0.452064	5.79028	14.8205	0.000118246	0.00270024							ENSMUSG00000017418	0.817586	5.2467	10.0823	0.00149699	0.0321914	ENSMUSG00000035161	-0.364172	4.44308	15.6293	7.70521e-05	0.00154861	ENSMUSG00000027878	-0.282318	5.48828	12.0459	0.000519051	0.0106631	ENSMUSG00000031808	0.44179	6.15892	14.7934	0.000119957	0.00254608	ENSMUSG00000049339	0.181514	7.55831	11.1985	0.000818614	0.0175446	ENSMUSG00000020572	-1.03552
ENSMUSG00000109324	0.152528	6.21387	13.6378	0.000221672	0.00499118	ENSMUSG00000027864	0.304064	5.83838	14.8053	0.000119201	0.00271766							ENSMUSG00000041536	-1.90443	1.64448	10.075	0.00150299	0.0322683	ENSMUSG00000032525	-0.280934	5.75577	15.6224	7.73337e-05	0.00155177	ENSMUSG00000056493	-0.278276	5.38713	12.0446	0.000519419	0.0106631	ENSMUSG00000021996	-0.449008	8.24855	14.7912	0.000120093	0.00254608	ENSMUSG00000026259	-0.458861	5.69075	11.1981	0.000818831	0.0175446	ENSMUSG00000020437	0.774034
ENSMUSG00000056665	0.186904	5.69437	13.6108	0.000224891	0.00505554	ENSMUSG00000048834	0.23645	6.53784	14.8013	0.000119453	0.00271904							ENSMUSG00000040006	0.384776	5.43102	10.0574	0.00151736	0.0325246	ENSMUSG00000001288	0.308735	4.82543	15.6186	7.74881e-05	0.00155237	ENSMUSG00000005142	-0.314399	5.65531	12.0311	0.000523193	0.0107234	ENSMUSG00000034593	-0.604653	6.84121	14.7869	0.000120367	0.00254779	ENSMUSG00000038141	0.858715	2.80952	11.195	0.000820176	0.0175446	ENSMUSG00000044345	-0.679102
ENSMUSG00000031540	-0.263901	6.5326	13.5763	0.000229059	0.00513318	ENSMUSG00000034807	-0.231088	5.98407	14.782	0.000120682	0.00274036							ENSMUSG00000030518	1.30676	0.99796	10.0444	0.0015281	0.0327024	ENSMUSG00000035283	0.497181	5.31918	15.6153	7.76221e-05	0.00155257	ENSMUSG00000026836	-0.260475	4.39426	11.9983	0.000532493	0.0108965	ENSMUSG00000078515	-0.362627	7.16354	14.776	0.000121069	0.00255856	ENSMUSG00000028152	-0.332608	5.91226	11.1907	0.000822096	0.0175446	ENSMUSG00000025903	-0.457625
ENSMUSG00000072919	-1.00348	0.615037	13.5761	0.000229078	0.00513318	ENSMUSG00000020368	0.147187	8.75273	14.7805	0.000120776	0.00274036							ENSMUSG00000004771	0.339861	6.6417	10.0382	0.00153328	0.0327607	ENSMUSG00000077450	0.318214	6.96158	15.5806	7.90612e-05	0.00157882	ENSMUSG00000024360	0.21312	6.97509	11.9871	0.000535693	0.0109277	ENSMUSG00000022228	0.392174	5.25678	14.7461	0.000123002	0.00259525	ENSMUSG00000066637	-0.417691	4.06087	11.1902	0.000822302	0.0175446	ENSMUSG00000070594	-3.17518
ENSMUSG00000026792	-0.180811	5.54061	13.5644	0.000230511	0.00515705	ENSMUSG00000033342	0.292551	5.54036	14.7761	0.000121061	0.00274243							ENSMUSG00000039367	-0.327855	8.19949	10.0323	0.00153816	0.0327833	ENSMUSG00000094870	-0.358524	4.33567	15.5261	8.13746e-05	0.0016213	ENSMUSG00000020458	-0.221859	6.91248	11.987	0.000535732	0.0109277	ENSMUSG00000038612	-0.273834	7.13611	14.7324	0.000123899	0.00261	ENSMUSG00000034168	-0.22064	6.4365	11.1519	0.000839465	0.0178822	ENSMUSG00000024052	-1.08416
ENSMUSG00000030283	-0.204172	6.32222	13.5573	0.000231391	0.00516847	ENSMUSG00000043122	0.976331	0.668726	14.7706	0.000121415	0.00274286							ENSMUSG00000034118	0.430819	2.74676	10.031	0.00153925	0.0327833	ENSMUSG00000025369	0.270313	7.06927	15.5244	8.14484e-05	0.0016213	ENSMUSG00000040331	0.223469	5.24208	11.9791	0.000538003	0.0109565	ENSMUSG00000022074	0.76314	1.82279	14.7244	0.000124424	0.00261688	ENSMUSG00000034105	-0.291853	3.90419	11.1447	0.000842741	0.0179234	ENSMUSG00000024300	1.05392
ENSMUSG00000038349	-0.200266	5.53927	13.5185	0.000236223	0.00526801	ENSMUSG00000028347	0.239932	6.4794	14.7698	0.000121467	0.00274286							ENSMUSG00000031971	0.719504	2.15842	10.0172	0.00155085	0.0329777	ENSMUSG00000020390	-0.346454	8.17261	15.5146	8.18698e-05	0.0016271	ENSMUSG00000027314	-0.278729	5.14511	11.9753	0.000539091	0.0109612	ENSMUSG00000015766	-0.35524	7.60252	14.6896	0.000126741	0.00266136	ENSMUSG00000028128	-0.38115	5.00328	11.1312	0.000848857	0.0180008	ENSMUSG00000022781	-0.268953
ENSMUSG00000036915	-0.895823	3.19635	13.5018	0.000238332	0.00530657	ENSMUSG00000029348	-0.230762	6.72012	14.7529	0.000122558	0.0027631							ENSMUSG00000066278	-0.333332	4.94932	10.0063	0.00156005	0.0330293	ENSMUSG00000020572	-0.597408	7.33493	15.4976	8.26106e-05	0.00163921	ENSMUSG00000027099	0.249673	6.52744	11.9494	0.000546653	0.0110973	ENSMUSG00000040459	0.331988	6.21718	14.681	0.000127324	0.00266934	ENSMUSG00000031029	0.227062	6.71826	11.1301	0.000849383	0.0180008	ENSMUSG00000057342	0.798152
ENSMUSG00000029550	0.212471	6.51529	13.4969	0.000238954	0.00531199	ENSMUSG00000006676	-0.174324	7.54882	14.725	0.000124383	0.00279981							ENSMUSG00000033319	0.31398	5.30733	10.0058	0.00156045	0.0330293	ENSMUSG00000032902	-0.359551	8.22772	15.4829	8.32569e-05	0.00164941	ENSMUSG00000027194	-0.206623	5.5564	11.935	0.000550898	0.0111424	ENSMUSG00000028603	-0.277768	9.27567	14.6435	0.000129881	0.00271863	ENSMUSG00000024354	0.291029	7.85268	11.1278	0.000850434	0.0180008	ENSMUSG00000048965	1.02668
ENSMUSG00000020248	0.256092	5.3238	13.4856	0.000240399	0.00532877	ENSMUSG00000035437	0.154545	6.52332	14.6898	0.000126734	0.00284819							ENSMUSG00000037300	-0.322651	5.57622	10.0055	0.00156069	0.0330293	ENSMUSG00000014813	-0.856853	1.71283	15.4656	8.40224e-05	0.00166194	ENSMUSG00000028538	0.195001	6.1263	11.9334	0.000551364	0.0111424	ENSMUSG00000020258	-0.44244	6.89034	14.6285	0.000130917	0.00273597	ENSMUSG00000025194	-0.341256	8.63159	11.1157	0.000856005	0.0180901	ENSMUSG00000020982	-0.39037
ENSMUSG00000025777	-0.178199	7.04453	13.4851	0.00024047	0.00532877	ENSMUSG00000066232	0.193931	7.0769	14.6801	0.000127384	0.00285828							ENSMUSG00000000320	-1.18693	0.770493	9.99613	0.00156869	0.0331057	ENSMUSG00000029787	-0.338355	3.76197	15.4603	8.42577e-05	0.00166396	ENSMUSG00000090015	0.714724	1.4986	11.933	0.000551492	0.0111424	ENSMUSG00000052609	-0.473901	7.18252	14.6073	0.000132401	0.00276262	ENSMUSG00000033420	-0.43853	3.15666	11.0818	0.000871799	0.0183947	ENSMUSG00000056091	-1.31515
ENSMUSG00000018143	-0.26112	3.64174	13.4773	0.000241471	0.0053425	ENSMUSG00000024077	0.192783	6.84475	14.6717	0.000127952	0.00286648							ENSMUSG00000057561	0.389902	5.93778	9.99547	0.00156926	0.0331057	ENSMUSG00000054715	-0.529376	2.53294	15.4544	8.45221e-05	0.00166654	ENSMUSG00000036309	0.236715	7.22447	11.9122	0.000557667	0.0112306	ENSMUSG00000051506	1.09961	1.75736	14.587	0.000133835	0.00278703	ENSMUSG00000029838	-0.599756	2.16735	11.0785	0.000873351	0.0183983	ENSMUSG00000029053	-0.584922
ENSMUSG00000019790	-0.165373	7.18716	13.4597	0.00024374	0.0053842	ENSMUSG00000057729	1.21364	0.303714	14.6588	0.000128829	0.00288159							ENSMUSG00000022677	0.317805	4.52873	9.98666	0.00157678	0.0332119	ENSMUSG00000026544	0.518672	2.9007	15.4488	8.47692e-05	0.00166878	ENSMUSG00000036923	-0.737721	0.757347	11.9096	0.000558462	0.0112306	ENSMUSG00000021619	0.415033	3.54661	14.5825	0.000134152	0.00278703	ENSMUSG00000047434	-0.303804	4.24628	11.0725	0.000876161	0.0184284	ENSMUSG00000021557	-0.378326
ENSMUSG00000048960	-0.457087	5.78922	13.4463	0.000245494	0.0054144	ENSMUSG00000003437	-0.153865	5.9348	14.6521	0.00012929	0.00288734							ENSMUSG00000061028	-0.391791	5.88014	9.98236	0.00158047	0.0332372	ENSMUSG00000030798	0.880989	2.38914	15.4315	8.55515e-05	0.00168152	ENSMUSG00000042333	-0.49161	2.30247	11.9095	0.000558493	0.0112306	ENSMUSG00000044820	-1.44193	0.925321	14.5818	0.000134205	0.00278703	ENSMUSG00000054611	-0.183975	6.67038	11.0499	0.000886919	0.0185961	ENSMUSG00000049878	-0.595001
ENSMUSG00000028223	-0.495643	4.12756	13.4161	0.000249476	0.00548827	ENSMUSG00000044783	-1.12947	5.62305	14.645	0.000129781	0.00289212							ENSMUSG00000002771	-0.744452	3.71572	9.96209	0.00159796	0.0335419	ENSMUSG00000038871	-0.472382	5.13023	15.4182	8.61539e-05	0.0016907	ENSMUSG00000059291	0.19517	7.39446	11.9033	0.000560355	0.0112503	ENSMUSG00000064262	0.515444	4.0824	14.5677	0.000135211	0.00280351	ENSMUSG00000057440	-0.315813	4.48698	11.0499	0.000886924	0.0185961	ENSMUSG00000026288	0.785843
ENSMUSG00000047215	0.187838	7.64303	13.4149	0.000249627	0.00548827	ENSMUSG00000039001	0.198496	7.12255	14.6431	0.000129912	0.00289212							ENSMUSG00000018974	-0.274194	5.33427	9.95977	0.00159998	0.0335419	ENSMUSG00000039976	0.325086	7.1389	15.4108	8.64927e-05	0.00169469	ENSMUSG00000020546	0.437453	3.25537	11.8945	0.000563004	0.0112857	ENSMUSG00000060591	0.514964	4.10753	14.5301	0.000137936	0.00285375	ENSMUSG00000018339	0.244596	14.0832	11.0435	0.000889992	0.0186312	ENSMUSG00000024999	-0.380714
ENSMUSG00000048429	0.185248	6.23655	13.404	0.000251094	0.00551187	ENSMUSG00000015478	-0.214884	5.36099	14.6384	0.000130234	0.00289474							ENSMUSG00000028961	-0.39676	8.32204	9.95454	0.00160453	0.0335846	ENSMUSG00000020926	0.962719	4.76087	15.3829	8.77783e-05	0.00171718	ENSMUSG00000039208	-0.382423	3.9817	11.8876	0.00056508	0.0113096	ENSMUSG00000079610	0.546474	2.85953	14.5283	0.000138067	0.00285375	ENSMUSG00000003438	0.185059	6.10946	11.0349	0.000894148	0.0186888	ENSMUSG00000000290	0.829715
ENSMUSG00000002028	-0.256302	7.83053	13.3986	0.000251813	0.005519	ENSMUSG00000034112	-0.755631	0.642615	14.6316	0.000130701	0.00290059							ENSMUSG00000023572	0.283174	5.56138	9.94915	0.00160924	0.0336303	ENSMUSG00000031833	0.331334	3.97355	15.3736	8.82142e-05	0.00172301	ENSMUSG00000037995	-1.36333	0.568577	11.8764	0.000568502	0.0113602	ENSMUSG00000021866	-0.260723	7.32078	14.5029	0.000139946	0.00288807	ENSMUSG00000103585	-0.619083	1.10968	11.0286	0.00089716	0.0187224	ENSMUSG00000006641	-1.09336
ENSMUSG00000016664	0.244659	6.22281	13.3952	0.000252272	0.00552041	ENSMUSG00000030035	-0.248324	4.74938	14.6227	0.000131321	0.00290979							ENSMUSG00000110266	-1.05385	0.907193	9.94293	0.00161468	0.0336581	ENSMUSG00000063428	0.429564	5.73356	15.332	9.01783e-05	0.00175862	ENSMUSG00000074865	0.871966	1.44495	11.8733	0.000569441	0.0113612	ENSMUSG00000054715	-0.52322	3.22798	14.4939	0.000140617	0.00289606	ENSMUSG00000041702	-0.229764	5.86453	11.0224	0.000900154	0.0187555	ENSMUSG00000040383	-0.326459
ENSMUSG00000096606	0.531673	2.42502	13.3718	0.000255431	0.00558083	ENSMUSG00000022456	-0.135206	9.20665	14.6121	0.000132064	0.00292168							ENSMUSG00000074264	-1.78734	0.91863	9.94187	0.00161561	0.0336581	ENSMUSG00000025041	-0.506028	5.83479	15.327	9.04169e-05	0.00176052	ENSMUSG00000074158	0.923614	1.22639	11.8699	0.000570488	0.0113644	ENSMUSG00000019461	0.362207	4.7811	14.4915	0.000140793	0.00289606	ENSMUSG00000091803	0.267329	3.74549	11.0125	0.000905002	0.0188271	ENSMUSG00000064341	-0.506977
ENSMUSG00000075569	0.638275	2.34118	13.3658	0.000256261	0.00559024	ENSMUSG00000059534	0.163175	5.90741	14.6033	0.000132683	0.00293081							ENSMUSG00000030759	0.641152	3.91046	9.92938	0.00162662	0.0338346	ENSMUSG00000067336	-0.395955	6.55562	15.3064	9.14054e-05	0.001777	ENSMUSG00000019837	0.286366	4.7052	11.8554	0.000574944	0.0114353	ENSMUSG00000021134	0.389473	8.06409	14.4888	0.000140993	0.00289606	ENSMUSG00000006058	0.231933	5.68696	11.0032	0.000909557	0.0188924	ENSMUSG00000024140	-0.411898
ENSMUSG00000021750	-0.363642	7.77068	13.3292	0.000261303	0.00569119	ENSMUSG00000026238	0.147454	7.60098	14.5996	0.000132941	0.00293195							ENSMUSG00000068823	0.321191	7.91393	9.92591	0.00162968	0.0338456	ENSMUSG00000031506	1.13242	0.913377	15.2973	9.18459e-05	0.00178044	ENSMUSG00000028931	-0.839663	2.2528	11.8521	0.000575977	0.011438	ENSMUSG00000034617	-0.447011	4.09699	14.448	0.000144086	0.002955	ENSMUSG00000063652	-1.09309	2.4891	10.9981	0.000912076	0.0189066	ENSMUSG00000055137	-0.520336
ENSMUSG00000039221	-0.301439	5.32672	13.3264	0.000261701	0.00569119	ENSMUSG00000031916	-0.230723	4.93682	14.5888	0.000133704	0.00293974							ENSMUSG00000049872	1.00498	0.927529	9.92043	0.00163454	0.0338837	ENSMUSG00000003234	-0.290682	6.0857	15.2958	9.19184e-05	0.00178044	ENSMUSG00000024277	-0.214288	7.26837	11.8151	0.000587521	0.0116492	ENSMUSG00000028182	-0.661637	2.18561	14.4304	0.000145433	0.00297798	ENSMUSG00000024896	0.253642	5.88645	10.9954	0.000913406	0.0189066	ENSMUSG00000026088	0.453908
ENSMUSG00000074715	1.33298	0.65691	13.3109	0.000263865	0.00572935	ENSMUSG00000024581	0.203759	7.382	14.5877	0.000133783	0.00293974							ENSMUSG00000078570	-0.589554	2.85056	9.91813	0.00163659	0.0338837	ENSMUSG00000051390	0.4904	4.66818	15.2929	9.206e-05	0.00178044	ENSMUSG00000038936	0.300269	6.37358	11.8095	0.000589304	0.0116664	ENSMUSG00000029684	-0.272093	7.17421	14.3989	0.000147892	0.00301931	ENSMUSG00000028716	0.284212	8.67677	10.9932	0.00091449	0.0189066	ENSMUSG00000026259	-0.608903
ENSMUSG00000028053	-0.213463	7.55382	13.306	0.000264554	0.00573541	ENSMUSG00000003623	-0.218609	4.68622	14.5858	0.000133917	0.00293974							ENSMUSG00000034959	1.0614	1.98649	9.91217	0.0016419	0.033941	ENSMUSG00000020642	0.684705	4.03624	15.291	9.2153e-05	0.00178044	ENSMUSG00000025086	0.353781	3.28876	11.7935	0.000594377	0.0117486	ENSMUSG00000026610	-0.353112	6.39389	14.3986	0.000147909	0.00301931	ENSMUSG00000031591	0.301264	6.54919	10.9897	0.000916203	0.0189126	ENSMUSG00000040253	1.20447
ENSMUSG00000001158	0.287546	4.10083	13.292	0.000266543	0.00576961	ENSMUSG00000035285	0.268458	5.77476	14.5827	0.000134141	0.0029401							ENSMUSG00000067219	0.62275	5.44496	9.90536	0.00164798	0.0340141	ENSMUSG00000028396	-0.953004	5.77381	15.2782	9.27821e-05	0.00178982	ENSMUSG00000039725	0.391791	3.25036	11.7774	0.000599541	0.0118052	ENSMUSG00000022221	0.744247	0.920194	14.3896	0.000148624	0.00302921	ENSMUSG00000055762	0.199078	6.23404	10.9831	0.000919445	0.0189362	ENSMUSG00000062397	-0.344391
ENSMUSG00000021809	0.3991	3.65435	13.2803	0.000268209	0.00579671	ENSMUSG00000095567	-0.303453	6.5031	14.5592	0.000135823	0.00297238							ENSMUSG00000063281	0.384876	3.91409	9.88596	0.00166545	0.0343216	ENSMUSG00000024855	0.260892	5.61079	15.2353	9.49141e-05	0.0018265	ENSMUSG00000044548	-0.519429	2.62199	11.7754	0.000600171	0.0118052	ENSMUSG00000042115	0.785111	4.93693	14.3861	0.000148897	0.00303009	ENSMUSG00000031596	0.782275	2.34892	10.9816	0.000920186	0.0189362	ENSMUSG00000056501	-0.946092
ENSMUSG00000029600	-0.29088	4.45772	13.2635	0.00027063	0.00584003	ENSMUSG00000026843	-0.219126	5.67815	14.5432	0.000136981	0.00299182							ENSMUSG00000035529	0.4415	5.22512	9.87704	0.00167354	0.034362	ENSMUSG00000031216	0.293969	6.02363	15.234	9.49761e-05	0.0018265	ENSMUSG00000029191	0.246164	5.5316	11.7734	0.00060082	0.0118052	ENSMUSG00000091898	-0.98824	1.21156	14.3479	0.000151946	0.00308738	ENSMUSG00000030335	0.200042	6.0919	10.9775	0.000922247	0.0189494	ENSMUSG00000064254	0.98529
ENSMUSG00000029838	0.279708	7.96222	13.2515	0.000272355	0.00586601	ENSMUSG00000022211	-0.330385	6.29927	14.5411	0.000137133	0.00299182							ENSMUSG00000031337	0.502244	5.785	9.87633	0.00167419	0.034362	ENSMUSG00000029561	0.704384	3.59649	15.2283	9.52655e-05	0.00182924	ENSMUSG00000036983	0.492293	3.02511	11.773	0.00060095	0.0118052	ENSMUSG00000027782	-0.348963	6.52602	14.3425	0.000152386	0.00309156	ENSMUSG00000040852	-0.53691	2.85129	10.9715	0.000925234	0.0189815	ENSMUSG00000025724	-0.301563
ENSMUSG00000025854	0.172054	5.9971	13.2494	0.000272672	0.00586601	ENSMUSG00000032101	0.246961	5.75733	14.5316	0.000137828	0.00300013							ENSMUSG00000031357	0.354739	6.11441	9.8753	0.00167513	0.034362	ENSMUSG00000026121	0.47094	4.48927	15.2222	9.55756e-05	0.00183238	ENSMUSG00000004530	-0.324726	5.36292	11.7702	0.000601861	0.0118052	ENSMUSG00000029513	0.266342	5.80392	14.3323	0.000153212	0.00310225	ENSMUSG00000036339	-0.264976	4.90588	10.9662	0.000927903	0.019007	ENSMUSG00000059811	-0.394105
ENSMUSG00000021972	-0.155244	6.26409	13.2409	0.000273904	0.00588347	ENSMUSG00000029071	-0.197343	7.11282	14.5294	0.000137991	0.00300013							ENSMUSG00000020131	-0.901657	3.94634	9.87043	0.00167956	0.0344001	ENSMUSG00000007659	-0.826603	5.47029	15.2122	9.60797e-05	0.00183922	ENSMUSG00000024370	-0.169648	5.37953	11.76	0.000605178	0.0118486	ENSMUSG00000001415	-0.269376	6.52527	14.3302	0.000153383	0.00310225	ENSMUSG00000039238	-0.613265	2.33079	10.962	0.000930017	0.0190117	ENSMUSG00000018923	0.487527
ENSMUSG00000006930	0.203247	8.20365	13.2277	0.000275836	0.00591386	ENSMUSG00000036552	-0.384132	3.2544	14.526	0.000138238	0.00300013							ENSMUSG00000012350	0.527095	6.30956	9.86477	0.00168473	0.0344346	ENSMUSG00000023020	0.272177	6.64236	15.1984	9.67845e-05	0.00184987	ENSMUSG00000060904	0.222265	6.41695	11.7566	0.000606294	0.0118486	ENSMUSG00000032598	-0.285166	4.29245	14.2894	0.000156741	0.00316459	ENSMUSG00000091405	1.97924	0.383981	10.9582	0.000931898	0.0190117	ENSMUSG00000042050	-0.575107
ENSMUSG00000019577	-0.692706	3.97301	13.2255	0.000276163	0.00591386	ENSMUSG00000048965	0.319784	3.66286	14.5243	0.00013836	0.00300013							ENSMUSG00000021709	0.50875	8.55703	9.86295	0.0016864	0.0344346	ENSMUSG00000023075	-0.321284	5.20612	15.1955	9.69335e-05	0.00184989	ENSMUSG00000029675	-0.727947	6.25493	11.7548	0.000606857	0.0118486	ENSMUSG00000028885	2.02657	2.47138	14.287	0.000156946	0.00316459	ENSMUSG00000028163	-0.253632	5.49078	10.9552	0.000933412	0.0190117	ENSMUSG00000024486	0.903759
ENSMUSG00000019810	-0.285816	5.63592	13.2194	0.000277067	0.00592415	ENSMUSG00000041119	-0.312892	4.55614	14.5182	0.000138811	0.0030053							ENSMUSG00000029378	-0.759242	2.92599	9.8584	0.00169058	0.0344673	ENSMUSG00000110185	-0.438297	4.4872	15.1898	9.72284e-05	0.00185268	ENSMUSG00000050812	0.199262	7.63918	11.7325	0.000614181	0.0119732	ENSMUSG00000029778	0.665162	1.92607	14.2747	0.000157972	0.00317581	ENSMUSG00000042046	-0.218008	5.51575	10.9521	0.000934974	0.0190117	ENSMUSG00000024190	-0.850166
ENSMUSG00000066233	0.431719	2.50794	13.2008	0.000279828	0.00597407	ENSMUSG00000035967	-0.258125	5.9093	14.5143	0.0001391	0.00300698							ENSMUSG00000025221	0.54913	3.15448	9.84109	0.00170657	0.03474	ENSMUSG00000027091	-0.267333	5.67535	15.1809	9.76854e-05	0.00185855	ENSMUSG00000022636	-0.697825	2.57248	11.7195	0.0006185	0.0120391	ENSMUSG00000006732	0.559502	4.56211	14.2746	0.000157984	0.00317581	ENSMUSG00000051486	1.0881	0.222623	10.9515	0.000935261	0.0190117	ENSMUSG00000078920	1.07147
ENSMUSG00000042804	0.269537	5.84114	13.1913	0.000281246	0.00599019	ENSMUSG00000037971	-0.331717	4.09628	14.5095	0.000139451	0.00300999							ENSMUSG00000035069	-0.394778	3.82384	9.82647	0.00172018	0.0349348	ENSMUSG00000053964	1.4604	4.54637	15.1697	9.82664e-05	0.00186314	ENSMUSG00000027386	-1.17577	0.412617	11.7132	0.000620567	0.0120609	ENSMUSG00000035666	-0.344003	5.0015	14.2663	0.000158683	0.00318502	ENSMUSG00000033039	-0.266284	5.42671	10.9133	0.000954742	0.0193757	ENSMUSG00000042485	0.973896
ENSMUSG00000001773	-0.685392	3.47083	13.1901	0.000281439	0.00599019	ENSMUSG00000015290	0.171692	5.99918	14.5059	0.000139724	0.00301129							ENSMUSG00000034109	0.312423	6.28966	9.82298	0.00172345	0.0349348	ENSMUSG00000028676	-0.335862	5.71635	15.1688	9.83143e-05	0.00186314	ENSMUSG00000062070	0.256009	8.0791	11.7097	0.000621739	0.0120653	ENSMUSG00000039252	-0.96147	1.14027	14.2557	0.000159578	0.00319564	ENSMUSG00000026102	0.36285	4.07975	10.9108	0.000956073	0.0193757	ENSMUSG00000026317	-0.660207
ENSMUSG00000038242	0.855749	2.57067	13.1797	0.000283003	0.00601436	ENSMUSG00000026021	0.230062	5.72901	14.4991	0.000140224	0.00301747							ENSMUSG00000031197	0.398605	4.96233	9.82241	0.00172398	0.0349348	ENSMUSG00000034845	0.541164	4.6283	15.1677	9.83741e-05	0.00186314	ENSMUSG00000000131	-0.258069	6.08088	11.6996	0.000625138	0.0121129	ENSMUSG00000038845	-0.389097	6.98431	14.2543	0.000159697	0.00319564	ENSMUSG00000034203	0.227599	5.50768	10.9028	0.000960213	0.0194301	ENSMUSG00000033991	-0.360707
ENSMUSG00000020153	0.189855	6.52468	13.1755	0.000283629	0.00601852	ENSMUSG00000041961	-0.267872	4.19661	14.4697	0.000142433	0.00306037							ENSMUSG00000024069	-0.329033	4.60586	9.81409	0.0017318	0.0350401	ENSMUSG00000031016	-1.06171	4.28968	15.1639	9.8569e-05	0.001864	ENSMUSG00000030761	-0.475371	2.92503	11.6849	0.000630092	0.0121904	ENSMUSG00000030168	-0.235055	7.1338	14.2406	0.000160862	0.00321155	ENSMUSG00000009927	0.282284	7.29375	10.8966	0.000963408	0.0194652	ENSMUSG00000053063	0.978258
ENSMUSG00000063663	-0.439901	4.03296	13.1718	0.000284193	0.00602136	ENSMUSG00000074698	0.163977	6.68246	14.4554	0.000143514	0.00307073							ENSMUSG00000047798	-0.95315	2.60529	9.81103	0.00173468	0.0350452	ENSMUSG00000021451	0.259814	5.90658	15.1548	9.90481e-05	0.00187023	ENSMUSG00000032812	-0.355871	5.49907	11.6732	0.000634081	0.0122194	ENSMUSG00000033909	-0.336249	5.28783	14.2387	0.000161023	0.00321155	ENSMUSG00000019883	0.31207	4.04042	10.8923	0.000965657	0.0194811	ENSMUSG00000046574	0.367756
ENSMUSG00000026361	-0.27093	5.66716	13.1688	0.000284652	0.00602197	ENSMUSG00000038257	0.410376	3.99898	14.4552	0.000143536	0.00307073							ENSMUSG00000034333	0.49717	3.42268	9.80796	0.00173758	0.0350508	ENSMUSG00000021024	-0.289415	6.6221	15.0988	0.000102029	0.00192147	ENSMUSG00000040249	-0.421594	8.06688	11.6731	0.000634089	0.0122194	ENSMUSG00000026222	0.404368	4.35093	14.2343	0.000161398	0.00321155	ENSMUSG00000048445	-0.391122	3.27294	10.8654	0.000979751	0.0197356	ENSMUSG00000052957	0.658923
ENSMUSG00000034931	-0.173689	5.48751	13.1558	0.000286632	0.00605473	ENSMUSG00000022816	0.279489	5.55801	14.4548	0.000143565	0.00307073							ENSMUSG00000042626	-0.257843	6.71707	9.80404	0.00174129	0.0350666	ENSMUSG00000049436	1.04031	1.81969	15.098	0.00010207	0.00192147	ENSMUSG00000044033	0.307625	8.16804	11.672	0.000634463	0.0122194	ENSMUSG00000003762	0.427186	5.135	14.2335	0.000161466	0.00321155	ENSMUSG00000038180	-0.87723	2.27054	10.8583	0.000983536	0.0197747	ENSMUSG00000031481	-1.40458
ENSMUSG00000027843	-1.71042	1.89098	13.1449	0.000288306	0.00608091	ENSMUSG00000008489	0.210068	6.41076	14.4366	0.000144955	0.0030958							ENSMUSG00000003585	-0.820071	8.38223	9.80159	0.00174361	0.0350666	ENSMUSG00000113902	-0.340169	6.44542	15.0733	0.000103415	0.00194386	ENSMUSG00000043259	-0.391538	3.39282	11.6573	0.000639506	0.0122804	ENSMUSG00000038600	-0.323361	8.47931	14.2288	0.000161871	0.00321475	ENSMUSG00000032021	-0.770719	0.850586	10.8562	0.000984657	0.0197747	ENSMUSG00000072704	-0.368796
ENSMUSG00000054452	0.123194	8.87064	13.1396	0.000289114	0.00608878	ENSMUSG00000032305	-0.178177	4.56956	14.4047	0.000147434	0.00314401							ENSMUSG00000047617	-0.397613	4.06625	9.78599	0.00175847	0.0353121	ENSMUSG00000049577	0.396127	5.17774	15.0583	0.00010424	0.00195205	ENSMUSG00000031328	-0.285606	8.15519	11.6572	0.000639552	0.0122804	ENSMUSG00000022485	0.708731	1.35087	14.208	0.000163671	0.00324561	ENSMUSG00000004931	0.221183	6.10765	10.8299	0.000998756	0.0200277	ENSMUSG00000061959	0.928738
ENSMUSG00000020955	0.19957	4.78318	13.1261	0.000291207	0.00612365	ENSMUSG00000037103	-0.290525	4.91509	14.3996	0.000147832	0.00314776							ENSMUSG00000038679	0.595468	2.67304	9.78069	0.00176354	0.0353608	ENSMUSG00000049421	-0.25703	5.31942	15.0545	0.000104449	0.00195205	ENSMUSG00000021573	0.267153	4.90743	11.6483	0.000642599	0.0123203	ENSMUSG00000078716	0.526508	4.22006	14.1791	0.000166204	0.00329088	ENSMUSG00000032872	0.251729	5.3575	10.8246	0.00100162	0.0200357	ENSMUSG00000068877	-1.87923
ENSMUSG00000048310	0.272582	3.75265	13.1153	0.000292896	0.00614994	ENSMUSG00000026121	-0.331511	4.60085	14.3827	0.000149167	0.00317142							ENSMUSG00000021390	0.79871	4.31896	9.76318	0.00178041	0.0355803	ENSMUSG00000024645	-0.291826	5.33983	15.0515	0.00010462	0.00195205	ENSMUSG00000020390	0.303739	8.09743	11.632	0.000648253	0.0124101	ENSMUSG00000011114	0.293122	5.05568	14.1762	0.000166467	0.003291	ENSMUSG00000075270	-1.04475	2.03176	10.8236	0.00100216	0.0200357	ENSMUSG00000036743	1.24886
ENSMUSG00000015656	-0.208362	9.51252	13.1009	0.00029515	0.00618799	ENSMUSG00000054728	0.197291	8.35783	14.3757	0.00014972	0.00317841							ENSMUSG00000003929	0.532524	2.67452	9.75643	0.00178697	0.0355803	ENSMUSG00000069049	-0.27391	6.07781	15.0485	0.000104782	0.00195205	ENSMUSG00000037784	0.365273	2.91286	11.6061	0.00065736	0.0125656	ENSMUSG00000074657	0.920788	3.1649	14.1734	0.000166709	0.003291	ENSMUSG00000025437	-0.239529	5.4615	10.8046	0.00101247	0.0201318	ENSMUSG00000040918	0.467133
ENSMUSG00000021025	-0.462055	4.26549	13.0834	0.000297917	0.00623667	ENSMUSG00000073468	-0.235517	4.81002	14.3633	0.00015071	0.00319118							ENSMUSG00000037818	0.584045	4.92254	9.75379	0.00178954	0.0355803	ENSMUSG00000042745	-0.430641	4.95929	15.0484	0.000104787	0.00195205	ENSMUSG00000033192	-0.952391	0.96617	11.599	0.000659888	0.0125951	ENSMUSG00000042541	-0.310628	5.79928	14.1619	0.000167732	0.00330358	ENSMUSG00000059689	0.257566	3.9849	10.8045	0.00101255	0.0201318	ENSMUSG00000037190	0.460663
ENSMUSG00000026308	1.41519	0.128512	13.0774	0.000298875	0.00624738	ENSMUSG00000073684	-0.425451	4.0868	14.3625	0.000150772	0.00319118							ENSMUSG00000039414	-0.270144	4.79637	9.75211	0.00179117	0.0355803	ENSMUSG00000004562	0.394992	5.49151	15.0484	0.000104789	0.00195205	ENSMUSG00000053886	-0.635766	4.2591	11.5761	0.000668039	0.0127316	ENSMUSG00000007613	-0.283197	5.95355	14.1606	0.000167847	0.00330358	ENSMUSG00000028334	-0.390864	4.17473	10.804	0.00101283	0.0201318	ENSMUSG00000031217	0.51278
ENSMUSG00000040407	-0.28018	7.05647	13.0722	0.000299718	0.00625567	ENSMUSG00000026020	0.205086	5.27152	14.3245	0.000153851	0.00325093							ENSMUSG00000090124	-1.03086	7.7085	9.75001	0.00179321	0.0355803	ENSMUSG00000103749	0.851249	1.47614	15.0445	0.000105006	0.00195318	ENSMUSG00000021250	1.52943	2.37428	11.568	0.000670969	0.0127561	ENSMUSG00000038900	0.509383	6.85334	14.113	0.00017215	0.00338322	ENSMUSG00000031781	0.228124	6.17376	10.8036	0.001013	0.0201318	ENSMUSG00000038023	-0.427988
ENSMUSG00000043154	-0.233548	5.62288	13.0586	0.0003019	0.00629184	ENSMUSG00000061273	0.210911	5.2736	14.321	0.000154135	0.00325093							ENSMUSG00000020354	0.867914	1.14849	9.74925	0.00179396	0.0355803	ENSMUSG00000054099	-0.358124	4.28089	15.0381	0.000105362	0.00195688	ENSMUSG00000031111	-0.807289	4.44401	11.567	0.000671319	0.0127561	ENSMUSG00000031841	-0.605329	3.1379	14.1017	0.000173188	0.00339855	ENSMUSG00000021763	-0.619387	5.22664	10.791	0.00101995	0.0202107	ENSMUSG00000027014	2.67817
ENSMUSG00000020783	-0.269171	4.93686	13.0533	0.000302746	0.00630008	ENSMUSG00000094840	-1.05818	2.41346	14.3192	0.000154282	0.00325093							ENSMUSG00000060032	-0.384623	6.2472	9.7467	0.00179645	0.0355803	ENSMUSG00000042213	-0.58321	2.96542	15.0258	0.000106053	0.0019648	ENSMUSG00000064356	2.80001	1.18881	11.5524	0.000676619	0.0128193	ENSMUSG00000022403	-0.258377	7.82069	14.0848	0.00017475	0.00342411	ENSMUSG00000074826	-0.629619	1.34054	10.7909	0.00102001	0.0202107	ENSMUSG00000050730	-0.370776
ENSMUSG00000059796	-0.189216	7.41264	13.0448	0.000304126	0.00631941	ENSMUSG00000059900	1.08861	0.846162	14.3025	0.000155658	0.00327506							ENSMUSG00000030452	0.333058	6.18422	9.74546	0.00179767	0.0355803	ENSMUSG00000031808	0.359426	8.27438	15.0249	0.000106103	0.0019648	ENSMUSG00000051256	0.307612	3.99879	11.5523	0.000676655	0.0128193	ENSMUSG00000038335	-0.273771	4.3339	14.0783	0.000175358	0.00343092	ENSMUSG00000035000	0.468007	5.83321	10.7823	0.00102473	0.0202742	ENSMUSG00000031568	-0.368037
ENSMUSG00000029655	-0.290939	5.37234	13.0151	0.000308982	0.00641081	ENSMUSG00000042831	-0.224955	4.39705	14.2916	0.000156559	0.00328914							ENSMUSG00000015120	-0.233251	6.59565	9.74464	0.00179846	0.0355803	ENSMUSG00000074682	0.489762	3.94223	14.9876	0.00010822	0.00200103	ENSMUSG00000022358	0.312558	7.73962	11.5449	0.00067934	0.0128327	ENSMUSG00000042675	0.351441	6.34002	14.0713	0.000176012	0.00343862	ENSMUSG00000021242	0.252174	6.33478	10.7777	0.00102728	0.0202944	ENSMUSG00000038845	-0.370231
ENSMUSG00000054003	1.40456	0.36558	13.0103	0.000309776	0.00641459	ENSMUSG00000028546	0.160279	6.3442	14.2874	0.00015691	0.00329162							ENSMUSG00000049791	0.73793	3.99115	9.74104	0.00180199	0.0355973	ENSMUSG00000005374	-0.412863	3.94408	14.9661	0.000109461	0.00202099	ENSMUSG00000034152	0.215669	6.30218	11.5448	0.000679374	0.0128327	ENSMUSG00000074922	0.374128	3.7727	14.0627	0.000176816	0.00344923	ENSMUSG00000022793	0.657802	1.56734	10.7721	0.00103044	0.0203267	ENSMUSG00000027750	1.15373
ENSMUSG00000029769	-0.200974	6.55701	13.007	0.000310333	0.00641459	ENSMUSG00000089832	-0.390272	3.75596	14.2647	0.000158814	0.00332666							ENSMUSG00000020898	-0.412534	4.47052	9.7259	0.00181689	0.0358386	ENSMUSG00000024338	0.541452	3.47591	14.9442	0.000110736	0.00204151	ENSMUSG00000024300	-0.799334	2.99502	11.5366	0.000682384	0.0128705	ENSMUSG00000055491	-0.375485	4.27112	14.0496	0.000178051	0.00346532	ENSMUSG00000026535	1.6025	0.842182	10.7539	0.00104061	0.0204918	ENSMUSG00000025138	0.378625
ENSMUSG00000033207	0.585909	1.94412	13.0057	0.000310539	0.00641459	ENSMUSG00000021413	-0.17206	6.83304	14.2608	0.000159141	0.00332859							ENSMUSG00000025369	-0.294545	7.37628	9.72119	0.00182156	0.0358739	ENSMUSG00000002365	0.264894	5.61477	14.9133	0.000112566	0.00207217	ENSMUSG00000062397	0.248254	6.82486	11.5319	0.00068412	0.0128843	ENSMUSG00000067713	0.313001	4.50447	14.0484	0.000178167	0.00346532	ENSMUSG00000039246	0.66989	5.94808	10.7516	0.00104188	0.0204918	ENSMUSG00000002831	-2.08211
ENSMUSG00000042197	-0.201937	6.17829	12.9853	0.000313938	0.00647527	ENSMUSG00000039714	0.568475	3.40207	14.2554	0.000159603	0.00333334							ENSMUSG00000033434	-0.509283	3.64498	9.71844	0.00182428	0.0358739	ENSMUSG00000005718	0.550761	2.43825	14.9009	0.000113309	0.00208279	ENSMUSG00000079033	-1.76337	1.00839	11.5167	0.000689732	0.0129389	ENSMUSG00000074738	0.57389	2.30068	14.0436	0.000178618	0.00346898	ENSMUSG00000035572	-0.327971	5.06797	10.7333	0.00105225	0.0206653	ENSMUSG00000030086	0.862475
ENSMUSG00000041025	-0.256765	5.0815	12.9758	0.000315545	0.00648974	ENSMUSG00000040848	0.292969	5.17091	14.2425	0.000160701	0.00335132							ENSMUSG00000005069	-0.327313	6.45154	9.71597	0.00182674	0.0358739	ENSMUSG00000039285	-0.236715	6.4212	14.8945	0.000113694	0.00208458	ENSMUSG00000009575	0.267752	6.96969	11.5163	0.000689869	0.0129389	ENSMUSG00000027253	-0.363228	5.2558	14.0322	0.00017971	0.00348506	ENSMUSG00000032473	1.49791	0.468604	10.7003	0.00107117	0.0209829	ENSMUSG00000027951	0.38029
ENSMUSG00000057133	-0.187746	6.90064	12.9757	0.000315567	0.00648974	ENSMUSG00000042678	-1.42128	0.851374	14.2313	0.000161658	0.00336323							ENSMUSG00000050350	0.712671	1.76341	9.69706	0.00184563	0.0361765	ENSMUSG00000030522	-0.474898	4.13657	14.8937	0.000113741	0.00208458	ENSMUSG00000024544	-0.467731	3.55111	11.5158	0.000690063	0.0129389	ENSMUSG00000004328	-1.47958	1.43592	14.0102	0.00018182	0.00351856	ENSMUSG00000036208	-0.336316	3.22104	10.6996	0.00107157	0.0209829	ENSMUSG00000070873	1.46923
ENSMUSG00000018844	-0.650146	1.58897	12.9589	0.00031841	0.0065386	ENSMUSG00000038241	-0.289428	5.5574	14.2303	0.000161746	0.00336323							ENSMUSG00000034127	0.601235	8.5046	9.69473	0.00184797	0.0361765	ENSMUSG00000063047	-0.468073	3.06118	14.8889	0.00011403	0.0020857	ENSMUSG00000020389	0.4413	2.355	11.5055	0.000693919	0.0129922	ENSMUSG00000029407	-0.239348	6.54299	14.0086	0.000181972	0.00351856	ENSMUSG00000068740	-0.348569	7.33854	10.6866	0.00107917	0.0211008	ENSMUSG00000021140	-0.253372
ENSMUSG00000079157	0.185084	6.49248	12.9321	0.000323002	0.00661465	ENSMUSG00000041992	0.197826	7.10452	14.2256	0.000162147	0.00336664							ENSMUSG00000037686	0.67711	3.06064	9.69126	0.00185147	0.0361765	ENSMUSG00000072704	-0.412128	6.55826	14.8872	0.000114136	0.0020857	ENSMUSG00000030346	-1.01222	1.06992	11.4992	0.000696258	0.0130169	ENSMUSG00000117819	1.25313	0.931684	13.9945	0.000183344	0.00353964	ENSMUSG00000050022	0.721815	2.48101	10.6771	0.0010847	0.0211643	ENSMUSG00000020097	0.457875
ENSMUSG00000025980	-0.144496	7.14244	12.9317	0.000323057	0.00661465	ENSMUSG00000091405	1.97984	1.88678	14.2227	0.000162401	0.00336698							ENSMUSG00000061244	0.471843	5.86737	9.68976	0.00185298	0.0361765	ENSMUSG00000030830	1.32818	2.76039	14.884	0.000114329	0.00208617	ENSMUSG00000020460	0.172553	6.90016	11.4845	0.000701792	0.0130828	ENSMUSG00000056962	-0.391545	4.94285	13.9919	0.000183598	0.00353964	ENSMUSG00000019718	0.504601	5.09194	10.6734	0.00108685	0.0211643	ENSMUSG00000003228	0.515784
ENSMUSG00000027706	0.136088	7.35038	12.9229	0.000324578	0.00663608	ENSMUSG00000009734	0.585602	2.04456	14.2158	0.000163	0.00336999							ENSMUSG00000016940	-0.391561	5.55538	9.67273	0.00187023	0.0364301	ENSMUSG00000024665	0.530866	3.46877	14.8715	0.000115087	0.00209693	ENSMUSG00000003746	-0.334607	5.70531	11.4844	0.000701834	0.0130828	ENSMUSG00000019874	2.27904	1.73971	13.986	0.000184181	0.00354446	ENSMUSG00000045954	0.279817	4.67132	10.6729	0.00108718	0.0211643	ENSMUSG00000073079	-2.10754
ENSMUSG00000047423	0.176016	5.77125	12.9104	0.000326758	0.00667091	ENSMUSG00000038766	-0.38476	5.33794	14.2131	0.000163227	0.00336999							ENSMUSG00000063576	-0.331285	6.68255	9.67156	0.00187143	0.0364301	ENSMUSG00000048251	0.874135	1.95484	14.8495	0.000116442	0.00211853	ENSMUSG00000079019	-0.60651	1.26568	11.4497	0.000715067	0.0133101	ENSMUSG00000034739	-0.927463	2.83278	13.9813	0.000184636	0.00354446	ENSMUSG00000021474	0.246453	8.20582	10.6555	0.00109745	0.0213331	ENSMUSG00000015363	-0.41444
ENSMUSG00000028943	0.455354	3.39485	12.8984	0.000328864	0.00670414	ENSMUSG00000051316	0.398072	3.11791	14.2128	0.000163259	0.00336999							ENSMUSG00000018199	0.576498	3.03195	9.65951	0.00188374	0.0366164	ENSMUSG00000020290	-0.371179	5.70642	14.8378	0.000117162	0.00212726	ENSMUSG00000074194	0.761142	1.42361	11.4444	0.000717102	0.0133285	ENSMUSG00000018554	0.678644	4.60205	13.9811	0.000184655	0.00354446	ENSMUSG00000038406	-0.170269	6.72878	10.6418	0.00110558	0.0214599	ENSMUSG00000020326	-0.323539
ENSMUSG00000053110	-0.301967	4.89522	12.871	0.000333712	0.00679308	ENSMUSG00000042055	0.348362	6.07968	14.2084	0.000163635	0.00337283							ENSMUSG00000041135	0.486781	2.48379	9.64824	0.00189533	0.0366872	ENSMUSG00000003762	0.58922	3.53736	14.8362	0.000117262	0.00212726	ENSMUSG00000064358	2.26766	2.68701	11.4382	0.000719494	0.0133535	ENSMUSG00000007610	0.368051	4.46576	13.9626	0.000186484	0.00357437	ENSMUSG00000031314	-0.232124	5.65618	10.6307	0.00111227	0.0215583	ENSMUSG00000051124	0.760505
ENSMUSG00000087260	0.270125	4.80082	12.8612	0.000335469	0.00681894	ENSMUSG00000017299	-0.221557	4.68422	14.1958	0.000164741	0.00339069							ENSMUSG00000045103	0.508639	4.35706	9.64655	0.00189708	0.0366872	ENSMUSG00000028553	-1.8319	1.50237	14.8292	0.000117702	0.00213213	ENSMUSG00000026600	-0.450767	3.15173	11.4306	0.000722429	0.0133885	ENSMUSG00000038279	-0.315858	4.86043	13.9575	0.000186991	0.00357889	ENSMUSG00000028070	0.235335	5.86718	10.6242	0.00111619	0.0216029	ENSMUSG00000028906	-0.453795
ENSMUSG00000070883	1.21595	1.60098	12.8548	0.000336617	0.00682235	ENSMUSG00000041577	0.340213	4.24045	14.1762	0.000166465	0.00342122							ENSMUSG00000037797	-1.42509	5.5794	9.64567	0.00189799	0.0366872	ENSMUSG00000020186	-0.514915	4.81912	14.8242	0.000118014	0.00213468	ENSMUSG00000026810	-0.263373	3.6829	11.4258	0.000724306	0.0134018	ENSMUSG00000050846	-0.320124	4.13216	13.9528	0.000187454	0.00358255	ENSMUSG00000059325	0.636304	2.40586	10.611	0.00112415	0.0217255	ENSMUSG00000040363	0.63439
ENSMUSG00000052557	-0.251561	5.55112	12.8545	0.00033667	0.00682235	ENSMUSG00000039205	-0.260268	5.73724	14.1575	0.000168123	0.00345029							ENSMUSG00000034639	-0.651206	1.93138	9.64271	0.00190105	0.0366872	ENSMUSG00000037692	0.406213	5.82974	14.8038	0.000119294	0.00215411	ENSMUSG00000023886	-0.379935	5.95001	11.4189	0.000727013	0.0134018	ENSMUSG00000002578	0.806547	2.18405	13.9463	0.000188112	0.00358991	ENSMUSG00000030225	-0.36706	5.69148	10.6037	0.00112862	0.0217802	ENSMUSG00000040464	-0.382708
ENSMUSG00000068391	0.371774	3.42682	12.8481	0.000337814	0.00682235	ENSMUSG00000019951	0.150396	6.63257	14.1293	0.000170669	0.00349748							ENSMUSG00000047866	-0.354792	7.04989	9.64065	0.00190318	0.0366872	ENSMUSG00000025094	-0.797806	1.49621	14.8	0.000119533	0.00215411	ENSMUSG00000033909	0.232523	5.45184	11.4186	0.000727116	0.0134018	ENSMUSG00000027016	0.663361	2.37298	13.9431	0.000188427	0.00359073	ENSMUSG00000053862	0.332081	4.32033	10.5796	0.00114342	0.0220179	ENSMUSG00000027288	-0.32836
ENSMUSG00000029029	-0.288441	4.83376	12.8465	0.000338104	0.00682235	ENSMUSG00000110206	-0.584505	2.44217	14.1174	0.000171747	0.00351234							ENSMUSG00000039599	-0.331428	5.21076	9.63999	0.00190387	0.0366872	ENSMUSG00000040957	-0.816083	2.65399	14.7989	0.000119606	0.00215411	ENSMUSG00000028292	0.266745	4.16967	11.4159	0.000728176	0.0134018	ENSMUSG00000036249	0.518609	2.86347	13.9186	0.000190902	0.00363264	ENSMUSG00000034449	-0.259626	5.01888	10.5783	0.00114424	0.0220179	ENSMUSG00000021007	0.862339
ENSMUSG00000000948	-0.521206	3.71979	12.8446	0.000338453	0.00682235	ENSMUSG00000041654	0.403834	3.94273	14.1151	0.000171959	0.00351234							ENSMUSG00000024622	-0.369585	4.88253	9.62279	0.00192177	0.0369789	ENSMUSG00000046442	-0.440445	4.82677	14.7941	0.000119909	0.00215647	ENSMUSG00000010362	0.322971	4.60701	11.4154	0.000728394	0.0134018	ENSMUSG00000089876	0.463652	4.10466	13.9106	0.000191715	0.00364287	ENSMUSG00000014077	0.228678	7.22535	10.562	0.00115436	0.0221807	ENSMUSG00000032058	0.388457
ENSMUSG00000030760	-0.307038	4.67994	12.844	0.00033856	0.00682235	ENSMUSG00000032215	1.55588	3.87011	14.1131	0.000172137	0.00351234							ENSMUSG00000027508	0.472176	5.30031	9.61267	0.00193239	0.0371298	ENSMUSG00000032580	-0.330684	6.52823	14.7909	0.000120111	0.00215699	ENSMUSG00000004945	0.239784	6.32179	11.398	0.000735235	0.01349	ENSMUSG00000028343	-0.334399	6.43571	13.8965	0.000193162	0.00366149	ENSMUSG00000037017	0.251675	4.20942	10.5575	0.00115717	0.0222027	ENSMUSG00000052914	0.463248
ENSMUSG00000023020	0.209745	5.79279	12.8371	0.000339805	0.0068376	ENSMUSG00000050069	0.307445	4.87083	14.0979	0.000173538	0.00353161							ENSMUSG00000043088	1.10504	2.08352	9.60481	0.00194069	0.0372356	ENSMUSG00000050541	0.480253	5.91028	14.7807	0.000120766	0.00216563	ENSMUSG00000026784	0.3256	4.1506	11.3978	0.000735299	0.01349	ENSMUSG00000018449	0.413112	4.43341	13.8956	0.000193251	0.00366149	ENSMUSG00000026415	0.769966	5.24313	10.5376	0.00116968	0.0224105	ENSMUSG00000025825	0.315033
ENSMUSG00000063888	-0.274437	5.16206	12.8214	0.000342673	0.00688542	ENSMUSG00000044147	-0.180187	5.40385	14.0974	0.00017358	0.00353161							ENSMUSG00000025059	0.541965	7.93836	9.58808	0.00195845	0.0375224	ENSMUSG00000060586	1.23615	4.62163	14.7765	0.000121034	0.00216715	ENSMUSG00000030342	-0.419078	4.81982	11.3867	0.000739718	0.0135516	ENSMUSG00000025492	0.403636	4.89071	13.8881	0.000194022	0.00367083	ENSMUSG00000039218	-0.308385	9.13613	10.5012	0.00119299	0.0228243	ENSMUSG00000041731	1.3839
ENSMUSG00000081225	-0.923774	1.72688	12.8156	0.000343746	0.00689708	ENSMUSG00000037625	0.245402	7.15194	14.0941	0.000173891	0.00353289							ENSMUSG00000030291	0.405097	3.36762	9.58222	0.00196471	0.0375884	ENSMUSG00000025245	-0.361784	4.36009	14.774	0.000121198	0.00216715	ENSMUSG00000027257	-0.207951	7.4241	11.381	0.000741995	0.0135738	ENSMUSG00000034854	0.399597	4.36425	13.8711	0.00019579	0.00369897	ENSMUSG00000031561	-0.511084	2.367	10.4985	0.00119471	0.0228245	ENSMUSG00000027217	0.815514
ENSMUSG00000028128	-0.307059	5.11509	12.8123	0.000344356	0.00689944	ENSMUSG00000020536	-0.16988	6.33754	14.0573	0.000177328	0.00359756							ENSMUSG00000046806	-0.536214	1.71144	9.57698	0.00197032	0.0375974	ENSMUSG00000034422	0.278846	4.87295	14.7589	0.000122168	0.00218137	ENSMUSG00000041202	1.88929	1.0526	11.3715	0.000745783	0.0136146	ENSMUSG00000039753	-0.248045	6.02247	13.8594	0.000197009	0.00371668	ENSMUSG00000038331	-0.319681	4.89944	10.4889	0.00120094	0.0229106	ENSMUSG00000006442	-0.479816
ENSMUSG00000000339	0.205182	5.64737	12.7896	0.000348552	0.00697352	ENSMUSG00000020361	0.131597	7.98281	14.0493	0.000178079	0.00360763							ENSMUSG00000000148	-0.251209	4.28381	9.57653	0.00197081	0.0375974	ENSMUSG00000026014	-0.359218	7.33627	14.7452	0.000123063	0.00218653	ENSMUSG00000025555	-0.293974	4.23531	11.3701	0.000746357	0.0136146	ENSMUSG00000020167	0.285	5.43826	13.8541	0.000197562	0.00372114	ENSMUSG00000084786	0.226407	6.09223	10.4791	0.00120732	0.0229994	ENSMUSG00000031984	0.319996
ENSMUSG00000071253	0.251977	5.35627	12.7512	0.000355773	0.00710508	ENSMUSG00000030704	0.157132	8.48954	14.0418	0.000178789	0.00361115							ENSMUSG00000025931	0.673165	2.62832	9.55142	0.00199795	0.0380608	ENSMUSG00000040703	0.936539	2.09034	14.7446	0.000123099	0.00218653	ENSMUSG00000018900	0.32922	4.88114	11.3652	0.000748316	0.0136309	ENSMUSG00000017677	0.655487	6.00873	13.8518	0.00019781	0.00372114	ENSMUSG00000051022	-0.752047	1.16327	10.4758	0.00120945	0.0230072	ENSMUSG00000019970	-0.863165
ENSMUSG00000040852	0.323807	3.48185	12.7493	0.000356142	0.00710508	ENSMUSG00000074909	0.203717	5.57553	14.04	0.000178959	0.00361115							ENSMUSG00000028439	-0.441991	3.00393	9.54625	0.00200359	0.0380743	ENSMUSG00000021799	0.809588	1.95875	14.7441	0.000123135	0.00218653	ENSMUSG00000055923	-0.403323	4.03583	11.3531	0.00075322	0.0137007	ENSMUSG00000063063	-1.10394	2.06383	13.841	0.000198945	0.00373715	ENSMUSG00000001855	-0.197382	5.35083	10.4581	0.00122111	0.0231761	ENSMUSG00000027397	-0.899575
ENSMUSG00000023330	0.406626	2.84738	12.7455	0.000356876	0.00710959	ENSMUSG00000033526	-0.173221	7.38974	14.0394	0.000179017	0.00361115							ENSMUSG00000021620	-0.846567	5.99148	9.54361	0.00200647	0.0380743	ENSMUSG00000033855	0.525926	3.55317	14.7437	0.000123157	0.00218653	ENSMUSG00000022677	0.268337	5.60136	11.3489	0.000754922	0.0137121	ENSMUSG00000067279	-0.897821	1.38337	13.8294	0.00020018	0.00375501	ENSMUSG00000031822	-0.312477	4.88765	10.4571	0.00122181	0.0231761	ENSMUSG00000036591	-0.423919
ENSMUSG00000029212	-0.388258	7.09283	12.7414	0.000357653	0.00711496	ENSMUSG00000037049	0.13746	6.74905	14.0299	0.000179925	0.00361386							ENSMUSG00000035198	-0.395762	4.01439	9.54293	0.00200721	0.0380743	ENSMUSG00000062397	-0.264876	6.8865	14.7358	0.000123676	0.00218992	ENSMUSG00000036257	0.235911	7.27976	11.3278	0.00076355	0.0138292	ENSMUSG00000051224	0.504003	2.18265	13.8102	0.000202238	0.00378665	ENSMUSG00000037370	-0.421122	5.46451	10.4145	0.00125032	0.0236565	ENSMUSG00000029104	-0.281621
ENSMUSG00000051721	-0.350057	3.82128	12.7353	0.000358809	0.00711955	ENSMUSG00000039873	-0.626104	1.09238	14.0264	0.00018026	0.00361386							ENSMUSG00000040732	-0.810687	2.19974	9.53049	0.00202086	0.0382788	ENSMUSG00000021754	0.525605	5.23443	14.7351	0.000123722	0.00218992	ENSMUSG00000028691	0.244938	7.83409	11.3265	0.000764095	0.0138292	ENSMUSG00000011960	-0.280185	5.37533	13.8045	0.000202852	0.00378665	ENSMUSG00000028603	0.248343	9.199	10.4139	0.00125068	0.0236565	ENSMUSG00000025077	-0.601175
ENSMUSG00000116652	0.617926	1.9854	12.7322	0.000359404	0.00711955	ENSMUSG00000026409	-0.253015	5.16127	14.0263	0.000180274	0.00361386							ENSMUSG00000062949	0.469324	4.36144	9.51221	0.00204109	0.0385452	ENSMUSG00000046598	-0.669725	7.57151	14.7321	0.000123921	0.00218992	ENSMUSG00000037236	0.306627	5.71277	11.3252	0.00076462	0.0138292	ENSMUSG00000021959	-0.345799	4.84838	13.804	0.000202906	0.00378665	ENSMUSG00000079283	0.624296	2.07821	10.394	0.00126426	0.0238795	ENSMUSG00000036572	0.357411
ENSMUSG00000037593	0.516773	3.13594	12.7309	0.000359655	0.00711955	ENSMUSG00000048677	-0.787265	2.99107	14.0252	0.000180377	0.00361386							ENSMUSG00000025736	-0.425529	4.14793	9.51207	0.00204125	0.0385452	ENSMUSG00000003437	-0.265337	5.96341	14.7301	0.00012405	0.00218992	ENSMUSG00000117621	1.41744	1.53666	11.3188	0.000767262	0.0138574	ENSMUSG00000113255	-1.49927	0.669059	13.803	0.000203015	0.00378665	ENSMUSG00000044042	-0.338134	5.54583	10.3913	0.00126611	0.0238805	ENSMUSG00000030762	1.2602
ENSMUSG00000055782	-0.198055	5.56017	12.7292	0.000359989	0.00711955	ENSMUSG00000049421	0.212873	5.80994	14.0247	0.000180425	0.00361386							ENSMUSG00000028214	0.436316	3.27189	9.50997	0.00204358	0.0385452	ENSMUSG00000037031	0.559582	3.51532	14.712	0.000125248	0.00220512	ENSMUSG00000065979	0.234535	6.15275	11.3114	0.000770329	0.0138931	ENSMUSG00000024042	-0.683613	6.44854	13.79	0.000204417	0.00380741	ENSMUSG00000074028	0.463325	5.97422	10.3684	0.00128191	0.0241105	ENSMUSG00000026669	-0.878803
ENSMUSG00000021061	-0.267055	8.39914	12.7269	0.000360426	0.00711955	ENSMUSG00000002055	-0.473469	3.84329	14.0193	0.00018094	0.00361481							ENSMUSG00000042228	0.338243	5.87257	9.50109	0.0020535	0.0386776	ENSMUSG00000048550	-0.64208	2.98166	14.7117	0.000125265	0.00220512	ENSMUSG00000060216	-0.602754	4.31723	11.3051	0.000772934	0.0139066	ENSMUSG00000095041	-0.670575	6.22857	13.7692	0.000206701	0.00384452	ENSMUSG00000051262	0.808391	3.21363	10.3684	0.00128192	0.0241105	ENSMUSG00000041375	0.38546
ENSMUSG00000051985	0.36214	4.58128	12.7205	0.000361678	0.00713424	ENSMUSG00000034488	0.177949	7.21252	14.0189	0.000180982	0.00361481							ENSMUSG00000043542	0.515491	2.07536	9.4924	0.00206325	0.0388065	ENSMUSG00000037640	-0.416824	3.68379	14.7004	0.000126021	0.00221531	ENSMUSG00000036023	0.297348	4.13634	11.3044	0.000773255	0.0139066	ENSMUSG00000040204	1.0172	0.486756	13.7476	0.000209083	0.00388335	ENSMUSG00000091476	-0.594677	4.55274	10.356	0.00129058	0.0242392	ENSMUSG00000035133	-0.366456
ENSMUSG00000033658	-0.183791	5.34668	12.7133	0.00036306	0.00715142	ENSMUSG00000035268	0.301746	5.62029	14.014	0.000181451	0.00361907							ENSMUSG00000049940	-0.702541	6.53649	9.48508	0.0020715	0.0389068	ENSMUSG00000031903	0.462372	3.9665	14.6863	0.000126967	0.00222749	ENSMUSG00000054477	0.689093	3.87191	11.299	0.000775476	0.0139227	ENSMUSG00000044786	-0.58576	5.3189	13.7298	0.000211083	0.00391338	ENSMUSG00000053897	-0.324288	6.39128	10.3513	0.00129384	0.0242521	ENSMUSG00000028826	-0.388284
ENSMUSG00000035236	-0.35407	6.1332	12.7037	0.000364933	0.00717821	ENSMUSG00000034145	-0.289985	5.91162	14.0082	0.000182012	0.00362117							ENSMUSG00000014226	0.397727	5.21212	9.46622	0.0020929	0.0392537	ENSMUSG00000048915	-0.313479	4.42172	14.6847	0.000127071	0.00222749	ENSMUSG00000036093	0.289052	6.17524	11.2956	0.000776905	0.0139227	ENSMUSG00000007603	0.267949	5.22107	13.7266	0.000211438	0.00391338	ENSMUSG00000014303	-0.22246	7.80594	10.3491	0.00129537	0.0242521	ENSMUSG00000022401	-0.355004
ENSMUSG00000043384	-0.151291	9.51487	12.6851	0.000368578	0.00723975	ENSMUSG00000024319	0.217282	6.64073	14.0077	0.000182067	0.00362117							ENSMUSG00000027708	0.402945	5.39568	9.45489	0.00210587	0.0394416	ENSMUSG00000026039	1.34485	1.54318	14.6573	0.000128934	0.00225698	ENSMUSG00000031659	-0.449011	4.8542	11.2915	0.000778617	0.0139227	ENSMUSG00000018899	0.439402	3.9204	13.7253	0.00021159	0.00391338	ENSMUSG00000028583	0.570622	2.42294	10.3472	0.00129672	0.0242521	ENSMUSG00000020865	0.967758
ENSMUSG00000031698	1.50741	1.26142	12.677	0.000370185	0.00726112	ENSMUSG00000085957	0.613146	2.07483	14.0047	0.000182352	0.00362176							ENSMUSG00000048572	0.846132	5.88322	9.44196	0.00212077	0.0395968	ENSMUSG00000028980	0.321437	5.65244	14.6365	0.000130363	0.0022788	ENSMUSG00000042350	0.262371	6.2138	11.2892	0.000779599	0.0139227	ENSMUSG00000039157	-0.470165	6.7993	13.7074	0.000213613	0.00394525	ENSMUSG00000034639	-0.478421	2.89852	10.3412	0.00130096	0.0242973	ENSMUSG00000029404	0.26292
ENSMUSG00000049882	0.300727	3.69714	12.6679	0.000371993	0.00728639	ENSMUSG00000057322	0.196474	6.31896	14.0014	0.000182677	0.00362313							ENSMUSG00000000127	0.349265	3.44191	9.44181	0.00212095	0.0395968	ENSMUSG00000026185	0.545694	7.87431	14.627	0.000131027	0.00228719	ENSMUSG00000039477	-0.268093	6.66214	11.2892	0.000779601	0.0139227	ENSMUSG00000034041	0.700085	1.01926	13.7005	0.000214399	0.00395424	ENSMUSG00000051579	-0.478266	4.63817	10.327	0.00131096	0.0244254	ENSMUSG00000033192	1.01527
ENSMUSG00000023072	-0.359747	3.58128	12.6609	0.000373374	0.00730321	ENSMUSG00000034911	-0.377915	2.97017	13.9802	0.000184743	0.00365682							ENSMUSG00000003360	-0.229153	6.73764	9.43998	0.00212306	0.0395968	ENSMUSG00000033964	-0.406116	4.60844	14.6238	0.000131249	0.00228788	ENSMUSG00000037206	-0.386394	4.94979	11.2701	0.000787637	0.0140466	ENSMUSG00000005718	0.651672	3.23974	13.6975	0.000214735	0.0039549	ENSMUSG00000043518	0.794768	1.70514	10.3263	0.00131148	0.0244254	ENSMUSG00000032000	0.509862
ENSMUSG00000011427	-0.354916	4.15487	12.6509	0.000375384	0.00733228	ENSMUSG00000038346	-0.212337	5.62607	13.9787	0.000184891	0.00365682							ENSMUSG00000026490	0.508207	5.26244	9.43362	0.00213044	0.0396387	ENSMUSG00000042524	0.236436	7.18031	14.617	0.000131719	0.00229286	ENSMUSG00000029469	-0.627438	7.6247	11.2443	0.000798699	0.014224	ENSMUSG00000060657	-0.261436	6.29545	13.6944	0.000215095	0.003956	ENSMUSG00000044819	0.258494	4.11399	10.3167	0.00131832	0.0245185	ENSMUSG00000024487	-0.337493
ENSMUSG00000038836	0.420958	3.14736	12.6331	0.000378985	0.00738783	ENSMUSG00000052566	-0.318658	4.34027	13.9584	0.000186899	0.00369139							ENSMUSG00000009035	-0.43298	6.21214	9.43293	0.00213124	0.0396387	ENSMUSG00000024013	0.930865	2.34489	14.6105	0.000132177	0.00229519	ENSMUSG00000016319	0.316678	8.16537	11.2294	0.000805106	0.0143181	ENSMUSG00000040552	0.941577	0.948353	13.6897	0.000215633	0.00396037	ENSMUSG00000062580	0.237301	6.63858	10.311	0.0013224	0.0245601	ENSMUSG00000032330	-0.313363
ENSMUSG00000034724	-0.185598	5.72533	12.6316	0.000379282	0.00738783	ENSMUSG00000091474	0.431981	4.41783	13.9387	0.000188869	0.00372511							ENSMUSG00000043336	0.408404	5.05538	9.42675	0.00213843	0.0397171	ENSMUSG00000057110	-0.342613	4.50924	14.6099	0.00013222	0.00229519	ENSMUSG00000055991	0.264841	4.00205	11.2267	0.000806297	0.0143193	ENSMUSG00000003500	0.455784	3.84946	13.6859	0.000216073	0.00396123	ENSMUSG00000038712	0.281108	6.71616	10.2973	0.00133222	0.0247081	ENSMUSG00000003348	0.71235
ENSMUSG00000075376	-0.224137	6.74484	12.6254	0.000380543	0.00740209	ENSMUSG00000022300	0.323685	4.73132	13.9305	0.0001897	0.0037363							ENSMUSG00000024949	-0.24627	7.59978	9.42145	0.00214462	0.0397553	ENSMUSG00000028693	-0.313991	4.38273	14.5924	0.000133453	0.00231337	ENSMUSG00000071178	1.6782	0.950839	11.2132	0.000812158	0.0143989	ENSMUSG00000040569	-0.683237	2.23188	13.6841	0.00021628	0.00396123	ENSMUSG00000038005	0.434199	3.54147	10.29	0.00133755	0.0247726	ENSMUSG00000026890	0.85283
ENSMUSG00000035277	0.431024	4.5442	12.6182	0.000382016	0.00741627	ENSMUSG00000057522	-0.136408	7.74622	13.9226	0.000190498	0.00374682							ENSMUSG00000109293	-0.542935	2.32066	9.41989	0.00214644	0.0397553	ENSMUSG00000117679	-0.380757	4.32751	14.5717	0.000134923	0.00233562	ENSMUSG00000029016	0.273428	4.72081	11.2112	0.000813035	0.0143989	ENSMUSG00000020814	0.438005	2.97278	13.681	0.000216633	0.00396219	ENSMUSG00000044231	-0.631005	2.30815	10.2836	0.0013422	0.0247959	ENSMUSG00000032135	0.613001
ENSMUSG00000022561	0.170126	5.27881	12.6151	0.000382647	0.00741627	ENSMUSG00000034771	-0.492322	5.64229	13.9098	0.000191792	0.00376703							ENSMUSG00000048612	-0.466746	4.51862	9.41645	0.00215048	0.0397749	ENSMUSG00000016356	1.05889	1.76675	14.5559	0.000136061	0.00235204	ENSMUSG00000022008	0.283647	4.80727	11.2046	0.000815949	0.0144305	ENSMUSG00000069539	-0.317493	5.90131	13.6749	0.000217339	0.00396959	ENSMUSG00000052419	0.216905	4.94615	10.2831	0.00134253	0.0247959	ENSMUSG00000024013	0.648234
ENSMUSG00000020477	0.2468	4.39061	12.614	0.00038286	0.00741627	ENSMUSG00000034024	0.138821	6.92235	13.9061	0.000192176	0.00376936							ENSMUSG00000030472	-0.746027	6.70236	9.40201	0.00216747	0.0400068	ENSMUSG00000069874	0.656896	4.35732	14.5304	0.000137918	0.00237879	ENSMUSG00000031023	-0.731705	3.24721	11.2002	0.000817901	0.0144451	ENSMUSG00000015656	-0.60903	9.65995	13.6684	0.000218096	0.00397563	ENSMUSG00000022438	0.465685	3.98432	10.2723	0.00135043	0.0249074	ENSMUSG00000031808	0.457463
ENSMUSG00000020440	0.158446	6.89814	12.6086	0.000383974	0.00742756	ENSMUSG00000024909	-0.328094	3.75051	13.894	0.000193415	0.00378688							ENSMUSG00000020482	0.430689	4.69415	9.39813	0.00217207	0.0400068	ENSMUSG00000079427	-1.00632	2.08974	14.5294	0.000137989	0.00237879	ENSMUSG00000028033	1.19698	2.08728	11.1929	0.000821098	0.0144815	ENSMUSG00000036594	0.623278	5.57007	13.6659	0.000218381	0.00397563	ENSMUSG00000033697	-0.256443	4.2007	10.2605	0.00135907	0.0250321	ENSMUSG00000021385	-0.354554
ENSMUSG00000028530	-0.169217	7.56217	12.6023	0.00038527	0.00744236	ENSMUSG00000037415	-0.179208	5.68048	13.8922	0.000193603	0.00378688							ENSMUSG00000020857	-0.486295	2.59112	9.39606	0.00217452	0.0400068	ENSMUSG00000052137	-0.739788	2.22423	14.5151	0.000139044	0.00239366	ENSMUSG00000038181	-0.34382	3.85827	11.1894	0.000822665	0.0144891	ENSMUSG00000012123	-1.65473	2.35788	13.6643	0.000218573	0.00397563	ENSMUSG00000090015	0.451132	2.029	10.2499	0.00136691	0.0251417	ENSMUSG00000023939	0.354479
ENSMUSG00000078302	0.494329	1.90934	12.5905	0.000387706	0.00747909	ENSMUSG00000037791	-0.17536	6.31769	13.8867	0.000194164	0.00379262							ENSMUSG00000031983	-0.443673	6.09504	9.39326	0.00217785	0.0400068	ENSMUSG00000030220	0.516317	3.90123	14.4957	0.000140482	0.00241366	ENSMUSG00000029063	-0.17933	5.69757	11.1859	0.000824209	0.0144963	ENSMUSG00000037216	0.637274	2.86424	13.6556	0.000219583	0.00398849	ENSMUSG00000032575	0.387841	5.1961	10.2373	0.00137627	0.0252791	ENSMUSG00000032089	0.84134
ENSMUSG00000031393	-0.218446	7.4601	12.5854	0.000388765	0.0074892	ENSMUSG00000027397	-0.149517	7.22065	13.8835	0.000194497	0.00379389							ENSMUSG00000024137	-0.322239	4.42758	9.39314	0.00217799	0.0400068	ENSMUSG00000024897	0.569043	3.38236	14.4942	0.000140592	0.00241366	ENSMUSG00000018433	-0.252569	4.59982	11.1786	0.000827465	0.0145336	ENSMUSG00000056185	0.514143	3.25332	13.6488	0.00022038	0.00399746	ENSMUSG00000031574	2.70001	3.70457	10.2216	0.00138808	0.0254609	ENSMUSG00000061111	0.336598
ENSMUSG00000021852	0.313551	3.57352	12.5365	0.000399076	0.00767728	ENSMUSG00000035953	-0.174059	6.19607	13.8711	0.000195787	0.00381382							ENSMUSG00000033453	0.605311	3.66762	9.38594	0.00218655	0.0401089	ENSMUSG00000045817	0.489596	5.53195	14.4772	0.000141865	0.00243217	ENSMUSG00000026965	-0.178385	5.74909	11.1736	0.000829698	0.0145481	ENSMUSG00000030704	-0.266686	6.34784	13.6462	0.000220686	0.0039975	ENSMUSG00000038527	-0.378947	5.18551	10.2137	0.00139399	0.0255341	ENSMUSG00000018395	0.619579
ENSMUSG00000090698	-0.685087	2.75969	12.5294	0.000400591	0.00769585	ENSMUSG00000021192	0.20163	4.91989	13.8656	0.000196364	0.00381981							ENSMUSG00000063511	-0.347848	8.01217	9.36416	0.00221269	0.0405327	ENSMUSG00000045427	-0.223729	6.08511	14.4724	0.00014223	0.00243507	ENSMUSG00000023010	-0.196122	8.02765	11.1713	0.000830743	0.0145481	ENSMUSG00000033653	-0.507856	6.16756	13.6434	0.000221019	0.00399805	ENSMUSG00000038459	0.17472	7.41526	10.2099	0.00139687	0.0255518	ENSMUSG00000025504	0.725318
ENSMUSG00000060314	0.354393	4.95331	12.5233	0.000401905	0.00771051	ENSMUSG00000031570	-0.318121	4.35009	13.8514	0.000197847	0.00384042							ENSMUSG00000051236	0.489847	3.89309	9.33628	0.00224661	0.0410713	ENSMUSG00000019528	-0.243298	7.2771	14.4601	0.000143157	0.00244759	ENSMUSG00000030798	-0.90129	2.77184	11.1691	0.000831708	0.0145481	ENSMUSG00000054986	-1.23821	4.71452	13.6292	0.000222691	0.00402278	ENSMUSG00000022912	0.230542	4.84101	10.2047	0.00140082	0.0255889	ENSMUSG00000030826	0.424859
ENSMUSG00000017667	-0.195504	5.19213	12.5123	0.000404292	0.00771986	ENSMUSG00000002105	-0.248056	5.05183	13.8503	0.000197965	0.00384042							ENSMUSG00000035776	0.516918	3.61916	9.33494	0.00224825	0.0410713	ENSMUSG00000054978	0.807836	2.14552	14.4359	0.000145011	0.0024759	ENSMUSG00000021079	0.258129	4.31233	11.1628	0.000834558	0.0145779	ENSMUSG00000014791	0.238475	5.53486	13.6164	0.000224221	0.00404487	ENSMUSG00000029699	0.716425	1.34883	10.1859	0.00141515	0.025787	ENSMUSG00000002748	-0.394016
ENSMUSG00000038550	-0.877944	4.18173	12.5112	0.000404515	0.00771986	ENSMUSG00000019647	0.189927	5.9083	13.8415	0.000198899	0.00385325							ENSMUSG00000022314	0.262336	7.49197	9.32878	0.00225583	0.0411535	ENSMUSG00000041264	-0.307805	4.82712	14.4201	0.000146236	0.0024934	ENSMUSG00000071713	-0.781558	2.03784	11.1398	0.000844953	0.0147394	ENSMUSG00000054708	0.508599	3.94113	13.6105	0.000224924	0.00405201	ENSMUSG00000071984	-0.532846	2.0272	10.1845	0.00141623	0.025787	ENSMUSG00000098112	0.794233
ENSMUSG00000034959	-1.28281	1.48764	12.5112	0.000404517	0.00771986	ENSMUSG00000028289	0.190459	6.10521	13.8296	0.000200153	0.00387227							ENSMUSG00000041763	0.43599	5.71695	9.31446	0.00227353	0.0414197	ENSMUSG00000073755	0.934182	3.47355	14.3947	0.00014822	0.00252379	ENSMUSG00000036944	0.906619	3.53702	11.1346	0.00084733	0.0147541	ENSMUSG00000025903	-0.696269	7.0624	13.6054	0.000225539	0.00405755	ENSMUSG00000003380	0.244131	7.01576	10.1829	0.00141746	0.025787	ENSMUSG00000095567	-0.307481
ENSMUSG00000022559	0.238465	4.71804	12.5108	0.000404597	0.00771986	ENSMUSG00000020781	-0.321083	3.45449	13.8231	0.000200848	0.00388042							ENSMUSG00000026393	0.39258	4.60939	9.30397	0.00228658	0.0415585	ENSMUSG00000034647	-0.557781	4.58606	14.3533	0.000151514	0.00257419	ENSMUSG00000028343	0.218371	5.1498	11.1287	0.000850032	0.0147541	ENSMUSG00000044813	0.276097	5.94328	13.6015	0.000226	0.00406031	ENSMUSG00000025504	-0.274168	7.18574	10.1788	0.00142068	0.0258103	ENSMUSG00000034173	-1.18296
ENSMUSG00000030917	0.661592	2.68847	12.5049	0.000405895	0.00773409	ENSMUSG00000056851	-0.1256	7.66282	13.8181	0.000201383	0.00388546							ENSMUSG00000037720	0.346037	6.38649	9.30226	0.00228872	0.0415585	ENSMUSG00000024592	-0.421486	4.21653	14.3523	0.000151593	0.00257419	ENSMUSG00000022178	-0.359547	3.50698	11.128	0.000850352	0.0147541	ENSMUSG00000032010	-1.00716	7.49852	13.5856	0.000227924	0.00408394	ENSMUSG00000024395	0.32914	5.80584	10.1673	0.00142952	0.0259297	ENSMUSG00000054405	0.28733
ENSMUSG00000037795	-0.294322	4.05047	12.5008	0.000406772	0.00774027	ENSMUSG00000048163	0.438257	4.59163	13.815	0.00020172	0.00388668							ENSMUSG00000004035	-1.0875	4.32432	9.30085	0.00229048	0.0415585	ENSMUSG00000050856	-0.289424	8.24782	14.3197	0.000154245	0.00261567	ENSMUSG00000009927	0.216075	7.28369	11.1262	0.000851155	0.0147541	ENSMUSG00000045665	0.357836	4.79814	13.5855	0.000227935	0.00408394	ENSMUSG00000028926	0.440193	2.71645	10.1652	0.00143114	0.0259297	ENSMUSG00000030031	-0.963885
ENSMUSG00000093674	0.200372	7.55154	12.4714	0.000413241	0.0078527	ENSMUSG00000008540	0.397794	2.86971	13.8042	0.000202882	0.00390377							ENSMUSG00000039069	-0.340129	3.69967	9.29476	0.0022981	0.0416077	ENSMUSG00000035597	-0.398362	5.10355	14.3002	0.000155851	0.00263932	ENSMUSG00000052911	-0.261004	9.34554	11.1253	0.000851577	0.0147541	ENSMUSG00000025558	0.458416	7.54593	13.5726	0.000229506	0.00410652	ENSMUSG00000094724	-0.752667	0.672238	10.1622	0.00143349	0.025937	ENSMUSG00000017754	0.808494
ENSMUSG00000004951	-0.578861	2.51074	12.466	0.000414417	0.00786438	ENSMUSG00000021548	0.190341	5.32232	13.794	0.000203983	0.00391962							ENSMUSG00000109378	-0.635277	2.05166	9.29371	0.00229942	0.0416077	ENSMUSG00000015354	-0.352101	4.4857	14.2718	0.00015822	0.00266846	ENSMUSG00000025656	0.369045	4.66512	11.1194	0.000854281	0.014778	ENSMUSG00000005583	0.35236	3.58667	13.5556	0.0002316	0.00413679	ENSMUSG00000018906	-0.303506	4.82628	10.1439	0.00144778	0.0261602	ENSMUSG00000037872	0.961749
ENSMUSG00000002379	0.200731	5.212	12.4501	0.000417975	0.00792116	ENSMUSG00000029502	0.187227	6.16076	13.7689	0.000206728	0.00396482							ENSMUSG00000037221	-0.368566	5.09811	9.28889	0.00230548	0.0416609	ENSMUSG00000032688	-0.452091	4.32889	14.2716	0.000158238	0.00266846	ENSMUSG00000030313	0.309459	4.759	11.1173	0.000855271	0.014778	ENSMUSG00000021998	0.450731	4.62214	13.5535	0.00023186	0.00413679	ENSMUSG00000026235	-0.510136	2.99407	10.1252	0.00146256	0.0263914	ENSMUSG00000024588	-0.355149
ENSMUSG00000006463	0.322864	4.66548	12.4445	0.000419223	0.00793408	ENSMUSG00000024109	0.155495	8.61835	13.7674	0.000206894	0.00396482							ENSMUSG00000023914	1.11215	8.47748	9.2839	0.00231176	0.0417179	ENSMUSG00000018379	-0.324882	6.75527	14.2704	0.000158334	0.00266846	ENSMUSG00000016918	-0.364559	5.14025	11.1138	0.000856862	0.0147855	ENSMUSG00000037885	-0.580098	5.89554	13.5498	0.000232317	0.00413679	ENSMUSG00000063458	0.594266	2.29422	10.119	0.00146749	0.0264446	ENSMUSG00000024044	0.950794
ENSMUSG00000061578	-0.209079	6.58681	12.4398	0.000420287	0.00794348	ENSMUSG00000005899	-0.226414	5.99986	13.7475	0.000209097	0.00399596							ENSMUSG00000054408	0.353126	6.30929	9.28042	0.00231617	0.041741	ENSMUSG00000034463	0.76058	2.3754	14.2693	0.000158427	0.00266846	ENSMUSG00000008036	0.233792	5.08577	11.1058	0.000860576	0.0148295	ENSMUSG00000026199	0.27235	5.81232	13.5487	0.000232453	0.00413679	ENSMUSG00000022235	0.366836	7.32633	10.106	0.00147789	0.0265961	ENSMUSG00000027566	0.277744
ENSMUSG00000038170	-0.182839	7.90892	12.4275	0.000423062	0.00798515	ENSMUSG00000049288	-0.165992	4.93556	13.7471	0.000209147	0.00399596							ENSMUSG00000028164	0.345701	4.49916	9.2597	0.00234251	0.0421588	ENSMUSG00000057440	-0.521658	3.94845	14.2665	0.000158665	0.00266848	ENSMUSG00000068566	-0.270566	8.0228	11.0896	0.000868137	0.0149397	ENSMUSG00000024978	-0.398742	7.76639	13.5423	0.000233248	0.00414534	ENSMUSG00000020205	-0.477959	2.55027	10.1023	0.00148085	0.0266134	ENSMUSG00000051224	0.792544
ENSMUSG00000040724	-0.208955	8.61514	12.4182	0.000425176	0.00800458	ENSMUSG00000037363	-0.319127	4.21069	13.7451	0.000209365	0.00399596							ENSMUSG00000016481	0.350588	5.59294	9.25689	0.00234611	0.0421668	ENSMUSG00000022961	-0.27751	8.32601	14.2619	0.000159053	0.00266848	ENSMUSG00000033488	0.649453	3.00766	11.0828	0.000871321	0.0149743	ENSMUSG00000054074	0.580785	3.45172	13.5195	0.0002361	0.00419039	ENSMUSG00000031818	0.188254	9.31748	10.0976	0.00148464	0.0266456	ENSMUSG00000037601	-0.329462
ENSMUSG00000047675	0.169518	7.18317	12.4179	0.000425234	0.00800458	ENSMUSG00000004270	-0.222338	4.38025	13.7369	0.000210284	0.00399932							ENSMUSG00000028719	0.359921	8.13661	9.22323	0.00238963	0.0428754	ENSMUSG00000034875	-0.500921	5.6727	14.2617	0.000159069	0.00266848	ENSMUSG00000047675	0.199117	7.5226	11.0663	0.000879117	0.015088	ENSMUSG00000032135	0.466119	4.21533	13.5153	0.000236621	0.00419397	ENSMUSG00000033712	-0.176986	5.7993	10.0759	0.00150217	0.026924	ENSMUSG00000029552	-0.98175
ENSMUSG00000026634	0.168095	5.97944	12.406	0.00042795	0.00804488	ENSMUSG00000035757	-0.284195	4.25308	13.7362	0.000210362	0.00399932							ENSMUSG00000056131	-0.39156	5.4538	9.22067	0.00239298	0.0428754	ENSMUSG00000021067	0.306264	4.55699	14.2583	0.000159354	0.00266966	ENSMUSG00000023022	-0.2502	5.44962	11.0457	0.000888952	0.0152363	ENSMUSG00000021751	-0.862463	6.19474	13.5091	0.000237404	0.00419933	ENSMUSG00000025867	0.366609	4.41729	10.071	0.00150625	0.0269609	ENSMUSG00000007812	-0.392958
ENSMUSG00000060336	-2.36001	1.58513	12.3573	0.00043926	0.00824644	ENSMUSG00000022044	0.180198	7.51757	13.736	0.000210387	0.00399932							ENSMUSG00000025930	-0.853443	1.50996	9.219	0.00239517	0.0428754	ENSMUSG00000023764	-0.312112	4.07339	14.2554	0.000159601	0.00267021	ENSMUSG00000021606	-0.258866	8.26179	11.04	0.000891681	0.0152626	ENSMUSG00000027875	2.29268	5.86384	13.5079	0.00023756	0.00419933	ENSMUSG00000035873	0.26752	6.17366	10.0655	0.00151074	0.0269912	ENSMUSG00000033577	-0.410295
ENSMUSG00000029166	0.144716	7.67763	12.3423	0.000442802	0.00830179	ENSMUSG00000026656	0.885996	1.08119	13.7246	0.000211661	0.00401816							ENSMUSG00000040167	0.743645	1.25144	9.21394	0.00240179	0.0429364	ENSMUSG00000033006	0.822309	1.69352	14.2509	0.000159981	0.00267298	ENSMUSG00000034686	-0.887652	0.206233	11.0269	0.000898013	0.0153504	ENSMUSG00000020042	1.10096	3.18516	13.48	0.000241124	0.00425286	ENSMUSG00000033096	0.317312	6.69687	10.0615	0.001514	0.0269912	ENSMUSG00000032648	-1.15629
ENSMUSG00000042363	-0.15664	6.18958	12.3369	0.0004441	0.008315	ENSMUSG00000021281	-0.752767	0.520863	13.7185	0.000212347	0.0040258							ENSMUSG00000020137	0.480676	4.27904	9.20866	0.00240873	0.0429654	ENSMUSG00000022587	0.448774	6.19757	14.248	0.000160233	0.00267362	ENSMUSG00000029066	-0.451096	5.10344	11.0233	0.000899716	0.0153589	ENSMUSG00000022602	-0.996844	2.28635	13.4791	0.000241233	0.00425286	ENSMUSG00000059475	0.310045	4.42011	10.0588	0.0015162	0.0269912	ENSMUSG00000029771	1.27244
ENSMUSG00000001065	-0.359077	4.55493	12.3321	0.00044524	0.00832521	ENSMUSG00000027953	-0.261813	4.92121	13.7052	0.000213862	0.00404871							ENSMUSG00000037243	-0.417399	3.99705	9.20781	0.00240985	0.0429654	ENSMUSG00000024856	0.32236	4.50327	14.2429	0.000160667	0.00267729	ENSMUSG00000051319	0.240282	5.07718	11.0185	0.000902092	0.0153743	ENSMUSG00000037640	-0.318021	3.66149	13.4742	0.000241865	0.00425564	ENSMUSG00000024713	-0.259557	5.64662	10.0564	0.00151823	0.0269912	ENSMUSG00000008958	0.357561
ENSMUSG00000038174	-0.31965	6.78191	12.3015	0.0004526	0.00845154	ENSMUSG00000022040	0.360305	3.68778	13.7023	0.000214194	0.00404871							ENSMUSG00000072825	-0.250132	7.42656	9.20191	0.00241763	0.0430468	ENSMUSG00000040841	0.415813	4.55385	14.1974	0.000164602	0.00273919	ENSMUSG00000021116	0.220194	5.49852	11.0165	0.000903026	0.0153743	ENSMUSG00000029804	0.615541	6.43841	13.4729	0.000242036	0.00425564	ENSMUSG00000022523	-1.04373	0.443512	10.0471	0.00152586	0.0269912	ENSMUSG00000031618	-0.607068
ENSMUSG00000015289	0.285491	3.42683	12.2801	0.000457807	0.0085374	ENSMUSG00000111375	0.214242	6.4648	13.7004	0.000214412	0.00404871							ENSMUSG00000038545	-0.440256	3.41909	9.18258	0.00244329	0.0434457	ENSMUSG00000039477	0.30363	6.54752	14.19	0.000165245	0.00274496	ENSMUSG00000028369	-0.662609	3.63611	10.9978	0.000912196	0.0155098	ENSMUSG00000030674	0.346953	6.27385	13.4642	0.000243154	0.00426961	ENSMUSG00000042589	0.799698	2.13862	10.0459	0.00152685	0.0269912	ENSMUSG00000032375	1.52266
ENSMUSG00000041378	0.615904	5.13421	12.2693	0.000460465	0.00857555	ENSMUSG00000017132	-0.300408	6.52898	13.6964	0.000214869	0.00404984							ENSMUSG00000029060	-0.338782	5.66325	9.17701	0.00245074	0.0435202	ENSMUSG00000117621	-1.37357	1.81332	14.1884	0.000165388	0.00274496	ENSMUSG00000031165	-0.819401	2.16074	10.9887	0.000916678	0.0155652	ENSMUSG00000018819	0.748309	2.79752	13.4601	0.000243693	0.00427337	ENSMUSG00000037692	-0.217857	5.55544	10.0456	0.00152715	0.0269912	ENSMUSG00000021959	-0.455676
ENSMUSG00000039512	-0.33934	5.60717	12.2477	0.000465838	0.00863856	ENSMUSG00000031848	-0.221336	5.08857	13.6948	0.000215043	0.00404984							ENSMUSG00000024193	-0.415777	5.3015	9.15529	0.00248	0.0439813	ENSMUSG00000044147	0.27283	5.11789	14.1794	0.000166181	0.00275445	ENSMUSG00000033855	-0.472686	3.75337	10.9769	0.000922555	0.0156442	ENSMUSG00000048497	0.486969	2.78682	13.4521	0.000244735	0.00428594	ENSMUSG00000089862	0.344715	4.51677	10.0449	0.00152774	0.0269912	ENSMUSG00000037921	0.749954
ENSMUSG00000026975	-0.339694	4.65344	12.2445	0.00046663	0.00863856	ENSMUSG00000039579	0.18289	5.67208	13.6864	0.000216013	0.0040627							ENSMUSG00000060703	0.537564	4.96655	9.15105	0.00248575	0.0439867	ENSMUSG00000025647	0.361749	5.57484	14.1753	0.000166544	0.0027568	ENSMUSG00000091264	0.240253	5.42414	10.9709	0.000925529	0.015659	ENSMUSG00000059326	0.589783	3.45883	13.4447	0.000245701	0.00429156	ENSMUSG00000095026	-0.778345	1.34817	10.0446	0.00152796	0.0269912	ENSMUSG00000049295	0.299274
ENSMUSG00000031026	-0.179778	5.76388	12.2421	0.000467237	0.00863856	ENSMUSG00000025576	-0.14057	8.48357	13.6714	0.000217743	0.00408982							ENSMUSG00000038518	0.351819	5.87535	9.15021	0.00248689	0.0439867	ENSMUSG00000060147	-0.2928	6.14517	14.1633	0.000167605	0.00276845	ENSMUSG00000042073	-0.356216	3.13081	10.9699	0.00092602	0.015659	ENSMUSG00000079343	-1.42583	0.565218	13.4444	0.000245736	0.00429156	ENSMUSG00000013936	1.82514	-0.145195	10.0443	0.00152818	0.0269912	ENSMUSG00000060147	0.520386
ENSMUSG00000032826	-0.185226	9.84232	12.2412	0.000467459	0.00863856	ENSMUSG00000002489	-0.204924	7.80839	13.6661	0.000218355	0.0040959							ENSMUSG00000032374	0.594077	2.70675	9.14704	0.0024912	0.0440046	ENSMUSG00000027680	-0.287511	7.68104	14.1624	0.000167691	0.00276845	ENSMUSG00000009281	-0.547629	4.71784	10.9678	0.000927104	0.015659	ENSMUSG00000039710	2.89748	1.56596	13.4422	0.000246032	0.00429156	ENSMUSG00000068614	2.14171	0.423414	10.0396	0.00153213	0.0270251	ENSMUSG00000021595	-0.310401
ENSMUSG00000024870	0.146984	7.14231	12.2405	0.000467628	0.00863856	ENSMUSG00000022763	-0.397362	7.51155	13.6586	0.000219233	0.00410693							ENSMUSG00000041308	0.389576	4.49127	9.13431	0.0025086	0.0442443	ENSMUSG00000039929	-0.354747	3.80704	14.1187	0.000171631	0.00282976	ENSMUSG00000056313	0.546176	4.93775	10.9449	0.000938593	0.0158321	ENSMUSG00000002052	-0.275367	6.98947	13.4396	0.000246372	0.00429181	ENSMUSG00000041669	-1.93903	1.22473	10.0371	0.00153419	0.0270256	ENSMUSG00000091971	-2.1725
ENSMUSG00000039713	0.239276	6.66495	12.2384	0.000468149	0.00863856	ENSMUSG00000025094	0.370331	3.93987	13.6368	0.000221794	0.00414942							ENSMUSG00000110170	-0.675212	2.10598	9.13227	0.0025114	0.0442443	ENSMUSG00000051747	-0.252906	12.4442	14.1133	0.000172119	0.00283076	ENSMUSG00000032172	-1.12057	0.459388	10.9337	0.000944287	0.0159071	ENSMUSG00000009292	1.0212	1.19165	13.4331	0.000247223	0.00430097	ENSMUSG00000024659	0.461955	3.77199	10.0264	0.00154315	0.0271476	ENSMUSG00000021094	0.597064
ENSMUSG00000024580	-0.258295	4.49791	12.2384	0.000468166	0.00863856	ENSMUSG00000028394	-0.222668	4.5672	13.6187	0.00022394	0.00417797							ENSMUSG00000032590	-0.328076	7.01361	9.12863	0.00251641	0.0442742	ENSMUSG00000044337	-0.391826	6.44382	14.113	0.000172145	0.00283076	ENSMUSG00000048865	-0.858153	3.61457	10.9196	0.000951534	0.0160081	ENSMUSG00000024727	-0.472542	4.14268	13.4088	0.000250446	0.0043505	ENSMUSG00000018698	-0.277906	4.73868	10.0214	0.00154728	0.0271845	ENSMUSG00000027559	0.844272
ENSMUSG00000089774	-0.343042	5.38933	12.2247	0.000471607	0.00869059	ENSMUSG00000036281	-0.325259	5.65503	13.6178	0.000224056	0.00417797							ENSMUSG00000001123	-0.499219	8.57746	9.12115	0.00252671	0.044379	ENSMUSG00000055633	0.59767	2.35283	14.0863	0.000174611	0.00286753	ENSMUSG00000024236	-0.235381	8.5571	10.9133	0.000954775	0.0160415	ENSMUSG00000030051	0.494914	2.07061	13.4067	0.000250731	0.0043505	ENSMUSG00000038844	-0.261731	6.32038	10.0159	0.00155193	0.0272302	ENSMUSG00000029925	0.914747
ENSMUSG00000024474	-0.175046	6.90102	12.22	0.000472807	0.00870127	ENSMUSG00000019984	-0.169779	5.57592	13.6165	0.000224204	0.00417797							ENSMUSG00000050721	-0.731299	4.00263	9.11528	0.00253483	0.044379	ENSMUSG00000023959	-0.322487	8.36664	14.0835	0.000174875	0.0028681	ENSMUSG00000050222	0.408991	2.57276	10.9081	0.000957465	0.0160655	ENSMUSG00000022831	0.444076	2.94735	13.4039	0.000251103	0.00435125	ENSMUSG00000116895	-1.13892	7.73717e-05	10.0127	0.00155463	0.0272419	ENSMUSG00000043998	-0.316663
ENSMUSG00000020171	0.184888	4.77178	12.2143	0.000474257	0.0087065	ENSMUSG00000057719	0.424967	2.88797	13.6125	0.00022468	0.00418135							ENSMUSG00000062647	0.498053	8.48259	9.11493	0.00253531	0.044379	ENSMUSG00000026409	-0.540055	6.52863	14.0637	0.000176724	0.00289198	ENSMUSG00000000530	-0.221419	5.41094	10.8958	0.000963823	0.016151	ENSMUSG00000039988	-0.25532	8.67544	13.38	0.000254319	0.00439839	ENSMUSG00000058600	0.332426	5.7001	10.0035	0.0015624	0.0273421	ENSMUSG00000023020	0.30407
ENSMUSG00000041685	-0.213509	5.35	12.2135	0.000474438	0.0087065	ENSMUSG00000015757	-0.248374	5.18049	13.607	0.000225347	0.00418827							ENSMUSG00000035798	0.557591	4.3718	9.11468	0.00253566	0.044379	ENSMUSG00000036862	0.460708	4.79097	14.0629	0.000176795	0.00289198	ENSMUSG00000059475	0.33534	3.49648	10.8811	0.000971513	0.0162585	ENSMUSG00000029642	-0.326596	5.27919	13.3788	0.000254491	0.00439839	ENSMUSG00000001289	0.236531	6.21316	9.99131	0.0015728	0.0274027	ENSMUSG00000025494	0.485271
ENSMUSG00000024213	0.142678	7.68408	12.2115	0.000474957	0.0087065	ENSMUSG00000028552	0.158546	7.8275	13.5854	0.000227952	0.00423113							ENSMUSG00000040329	0.780598	1.70757	9.10951	0.00254283	0.0444463	ENSMUSG00000037216	0.44215	2.9766	14.0588	0.000177186	0.00289458	ENSMUSG00000026011	-0.797627	1.50645	10.8601	0.000982582	0.0164222	ENSMUSG00000039943	-0.501819	3.78652	13.3585	0.00025726	0.00443659	ENSMUSG00000056091	0.619238	2.70965	9.99044	0.00157355	0.0274027	ENSMUSG00000055652	0.695955
ENSMUSG00000061518	0.187433	7.15002	12.1975	0.000478525	0.0087469	ENSMUSG00000035637	0.321022	4.87643	13.5766	0.000229024	0.00424548							ENSMUSG00000020641	-1.31161	3.51612	9.10617	0.00254749	0.0444695	ENSMUSG00000026028	-0.25723	8.51278	14.0538	0.00017765	0.00289837	ENSMUSG00000059248	-0.194434	5.84279	10.8561	0.000984691	0.016436	ENSMUSG00000020135	0.713706	1.21984	13.3576	0.000257374	0.00443659	ENSMUSG00000022973	-0.25597	5.25445	9.9901	0.00157384	0.0274027	ENSMUSG00000067369	-0.319974
[truncated: 1,925 more rows]
[truncated: 70 more columns]

## Sheet: Data S8B
Supplementary Data S8B. Full list of DE lncRNA genes for the second RNA-Seq dataset. Only the DE genes reaching statistical significance after multiple correction testing (FDR < 0.05) were retained.
[truncated: 464 more rows]
[truncated: 70 more columns]
