# Supplementary material for: Population level analyses reveal contrasting landscapes of gene expression divergence and evolution between male and female transcriptome lineages in the house mouse
Source: Research Square preprint supplement (doi:10.21203/rs.3.rs-6634316/v1), 2025-05-22
Supplement: Supplementary file 7 [file a0918bf8100a8e7f22fd3db2.xlsx]

## Sheet: Data S9A
Supplementary Data S9A. Full list of sex-biased protein-coding genes for the first RNA-Seq dataset. Only the DE genes reaching statistical significance after multiple correction testing (FDR < 0.05) were retained.
Brain																								Heart																								Kidney
DOM bias						MUS bias						SPR bias						DOM-MUS bias						DOM bias						MUS bias						SPR bias						DOM-MUS bias						DOM bias
Geneid	logFC	logCPM	LR	PValue	FDR	Geneid	logFC	logCPM	LR	PValue	FDR	Geneid	logFC	logCPM	LR	PValue	FDR	Geneid	logFC	logCPM	LR	PValue	FDR	Geneid	logFC	logCPM	LR	PValue	FDR	Geneid	logFC	logCPM	LR	PValue	FDR	Geneid	logFC	logCPM	LR	PValue	FDR	Geneid	logFC	logCPM	LR	PValue	FDR	Geneid	logFC
ENSMUSG00000056673	12.9948	4.55863	5134.89	0	0	ENSMUSG00000035027	0.204152	5.96685	15.6607	7.57829e-05	0.0246501	ENSMUSG00000069049	13.832	5.09602	6545.11	0	0	ENSMUSG00000069045	12.8732	5.4562	12435	0	0	ENSMUSG00000069045	14.3318	5.92796	4759.76	0	0	ENSMUSG00000069045	11.8933	5.64477	4948.92	0	0	ENSMUSG00000068457	13.0502	4.31859	3261.17	0	0	ENSMUSG00000069045	12.7205	5.80855	6999.15	0	0	ENSMUSG00000069045	14.3963
ENSMUSG00000068457	12.7289	4.2903	4457.08	0	0	ENSMUSG00000055692	0.314089	4.93548	15.6491	7.6247e-05	0.0246501	ENSMUSG00000069045	13.5673	5.74926	3550.73	0	0	ENSMUSG00000056673	12.2839	4.57332	11688.7	0	0	ENSMUSG00000069049	13.705	5.30133	4497.62	0	0	ENSMUSG00000056673	11.6661	3.8481	1781.57	0	0	ENSMUSG00000069045	12.1068	5.85933	4378.56	0	0	ENSMUSG00000056673	11.9445	3.87034	4968.57	0	0	ENSMUSG00000069049	14.3351
ENSMUSG00000069049	12.5514	4.97627	5612.73	0	0	ENSMUSG00000062044	0.322521	7.83593	15.6213	7.73773e-05	0.0246501	ENSMUSG00000056673	12.1892	4.3759	5394.22	0	0	ENSMUSG00000069049	12.139	5.17129	6345.6	0	0	ENSMUSG00000068457	12.6006	4.19749	3415.49	0	0	ENSMUSG00000068457	11.3937	4.15658	2566.66	0	0	ENSMUSG00000069049	11.6301	5.38253	5638.46	0	0	ENSMUSG00000068457	11.865	4.18121	5906.84	0	0	ENSMUSG00000068457	12.5246
ENSMUSG00000069045	12.5481	5.51059	8305.73	0	0	ENSMUSG00000029718	-0.578645	3.11998	15.6211	7.73866e-05	0.0246501	ENSMUSG00000068457	9.97632	4.10364	3712.19	0	0	ENSMUSG00000068457	10.9088	4.11906	4075.3	0	0	ENSMUSG00000056673	12.3216	3.9185	2964.2	0	0	ENSMUSG00000069049	11.1023	5.26526	3328.59	0	0	ENSMUSG00000056673	10.879	3.65861	2997.66	0	0	ENSMUSG00000069049	11.8444	5.28527	7491.9	0	0	ENSMUSG00000056673	12.3732
ENSMUSG00000035150	-0.576535	6.32575	131.122	2.32799e-30	6.84523e-27	ENSMUSG00000041650	-0.223833	5.0106	15.4378	8.52664e-05	0.0255271	ENSMUSG00000069053	9.76034	1.09322	516.293	2.71035e-114	8.12887e-111	ENSMUSG00000037369	-0.495383	5.83485	149.386	2.36167e-34	7.01841e-31	ENSMUSG00000037369	-0.826867	5.19659	188.558	6.56372e-43	1.79163e-39	ENSMUSG00000037369	-0.905814	5.30993	131.711	1.73099e-30	4.73807e-27	ENSMUSG00000037369	-0.845816	5.14531	136.557	1.50703e-31	4.0744e-28	ENSMUSG00000037369	-0.868958	5.25845	240.141	3.66433e-54	1.00644e-50	ENSMUSG00000028571	11.3183
ENSMUSG00000037369	-0.45485	5.8886	71.5183	2.74698e-17	6.73101e-14	ENSMUSG00000031877	-1.15623	-0.421211	15.4301	8.56157e-05	0.0255271	ENSMUSG00000035150	-0.630304	6.3648	262.829	4.14898e-59	1.03697e-55	ENSMUSG00000000787	-0.399038	8.74442	96.4827	9.00261e-23	2.2295e-19	ENSMUSG00000031226	-0.848524	3.70933	108.237	2.38459e-25	5.42416e-22	ENSMUSG00000031226	-0.718497	3.75768	85.9804	1.81725e-20	4.14515e-17	ENSMUSG00000069053	7.65773	0.0593114	98.6167	3.06421e-23	6.90367e-20	ENSMUSG00000031226	-0.777817	3.7373	173.662	1.17316e-39	2.68517e-36	ENSMUSG00000051483	-3.76955
ENSMUSG00000000787	-0.369032	8.6538	61.65	4.10274e-15	8.61694e-12	ENSMUSG00000022865	-0.212644	6.16285	15.4235	8.59145e-05	0.0255271	ENSMUSG00000037369	-0.544614	5.67373	118.657	1.24511e-27	2.66738e-24	ENSMUSG00000025332	-0.368308	6.61861	66.177	4.12194e-16	8.7497e-13	ENSMUSG00000075408	1.34583	1.36176	89.1143	3.72647e-21	7.26555e-18	ENSMUSG00000025332	-0.658264	6.29329	68.3262	1.38569e-16	2.49174e-13	ENSMUSG00000000787	-0.537576	8.42028	86.2269	1.6043e-20	3.09813e-17	ENSMUSG00000025332	-0.639239	6.30844	135.794	2.21395e-31	4.34344e-28	ENSMUSG00000036110	-9.58179
ENSMUSG00000031226	-0.332672	4.06899	43.9345	3.39556e-11	6.24019e-08	ENSMUSG00000058396	-0.510654	1.60658	15.4006	8.69604e-05	0.0255271	ENSMUSG00000000787	-0.337902	8.77337	77.1268	1.60329e-18	3.00536e-15	ENSMUSG00000035150	-0.637639	6.56912	60.4912	7.391e-15	1.37279e-11	ENSMUSG00000016194	0.955032	4.62321	77.9426	1.06078e-18	1.80969e-15	ENSMUSG00000021250	-1.90559	2.27767	68.2279	1.45652e-16	2.49174e-13	ENSMUSG00000035150	-0.601011	6.28462	81.598	1.66779e-19	2.81815e-16	ENSMUSG00000079105	2.13656	4.18262	78.9057	6.51463e-19	1.11832e-15	ENSMUSG00000020865	-4.97636
ENSMUSG00000025332	-0.3738	6.69737	42.8835	5.80993e-11	9.49084e-08	ENSMUSG00000040794	0.297705	6.71907	15.3237	9.0573e-05	0.0255378	ENSMUSG00000025332	-0.422088	6.47653	58.598	1.93414e-14	3.2227e-11	ENSMUSG00000031226	-0.4333	4.19572	58.7226	1.81542e-14	2.99726e-11	ENSMUSG00000035150	-0.523118	6.13617	76.5172	2.183e-18	3.3104e-15	ENSMUSG00000035150	-0.693669	6.52154	61.2861	4.93545e-15	7.50518e-12	ENSMUSG00000031226	-0.740804	3.57859	75.4181	3.80888e-18	5.72093e-15	ENSMUSG00000000787	-0.490968	8.39725	67.8323	1.78009e-16	2.71621e-13	ENSMUSG00000034612	2.69286
ENSMUSG00000018822	0.688339	1.45265	22.279	2.35773e-06	0.00346633	ENSMUSG00000022568	0.201048	6.00496	15.3196	9.07717e-05	0.0255378	ENSMUSG00000053161	-0.977317	0.74415	27.5163	1.55779e-07	0.000233606	ENSMUSG00000026365	-0.450903	5.17407	30.2859	3.72833e-08	5.53992e-05	ENSMUSG00000000787	-0.53706	8.31305	75.9839	2.85984e-18	3.56487e-15	ENSMUSG00000022371	-1.09161	5.38736	55.8747	7.72403e-14	1.05711e-10	ENSMUSG00000025332	-0.550839	6.26159	67.1381	2.53138e-16	3.42192e-13	ENSMUSG00000061780	-2.49867	4.81371	57.4434	3.47846e-14	4.77697e-11	ENSMUSG00000041698	7.43979
ENSMUSG00000016487	-0.252586	5.8022	21.7436	3.11623e-06	0.00416139	ENSMUSG00000002625	0.232547	7.44077	15.2672	9.33241e-05	0.0255378	ENSMUSG00000024530	-0.284538	4.51983	26.7019	2.37385e-07	0.000323621	ENSMUSG00000056665	0.218853	5.01602	21.661	3.25347e-06	0.00439485	ENSMUSG00000054203	2.9511	0.791435	75.9747	2.87321e-18	3.56487e-15	ENSMUSG00000020681	0.847822	5.17516	50.5324	1.17212e-12	1.45833e-09	ENSMUSG00000045573	1.50586	4.67246	56.1045	6.8719e-14	8.44494e-11	ENSMUSG00000035150	-0.611874	6.34267	50.4505	1.22208e-12	1.52571e-09	ENSMUSG00000022244	2.05305
ENSMUSG00000013766	-0.672882	1.36044	21.5784	3.39659e-06	0.00416139	ENSMUSG00000036446	-0.728653	3.39048	15.2286	9.52509e-05	0.0255378	ENSMUSG00000049225	0.358111	6.85783	26.2588	2.98589e-07	0.000373137	ENSMUSG00000049807	0.166029	6.88568	20.2375	6.84001e-06	0.00846964	ENSMUSG00000045573	1.11246	4.60705	75.7508	3.2182e-18	3.66016e-15	ENSMUSG00000079105	2.10267	4.46964	45.1473	1.82753e-11	2.0843e-08	ENSMUSG00000033207	-0.732796	2.70232	45.9565	1.2091e-11	1.36205e-08	ENSMUSG00000045573	0.804531	4.64908	48.3154	3.62891e-12	4.15298e-09	ENSMUSG00000041974	-3.33067
ENSMUSG00000027875	-0.443905	3.75336	18.6327	1.58482e-05	0.0179231	ENSMUSG00000040940	0.248529	6.04077	15.1963	9.68919e-05	0.0255378	ENSMUSG00000073176	-0.627898	2.28056	25.1838	5.21171e-07	0.000601191	ENSMUSG00000020331	0.198933	7.25265	19.5331	9.88702e-06	0.0113009	ENSMUSG00000020681	0.906373	5.87933	74.1259	7.32908e-18	7.6944e-15	ENSMUSG00000030218	-0.683414	7.09398	44.755	2.23294e-11	2.35077e-08	ENSMUSG00000019278	0.784596	5.44817	26.5092	2.62281e-07	0.000272731	ENSMUSG00000020681	0.880341	5.56287	45.5881	1.45922e-11	1.5415e-08	ENSMUSG00000057425	7.05841
ENSMUSG00000026365	-0.354313	5.0861	17.8961	2.33293e-05	0.0244991	ENSMUSG00000032356	0.14629	8.51504	15.1897	9.72317e-05	0.0255378	ENSMUSG00000053134	-0.482678	3.80334	24.6035	7.04233e-07	0.000754334	ENSMUSG00000040097	0.138036	8.27544	18.0949	2.10159e-05	0.0223053	ENSMUSG00000079105	2.28108	3.87135	63.3348	1.74396e-15	1.70011e-12	ENSMUSG00000000787	-0.460508	8.47443	34.5184	4.22244e-09	4.12773e-06	ENSMUSG00000039062	-0.552778	3.44774	25.5361	4.34173e-07	0.000419226	ENSMUSG00000022371	-1.34018	6.05024	44.2278	2.92298e-11	2.86723e-08	ENSMUSG00000056737	-2.52205
ENSMUSG00000029674	0.316619	6.33765	17.6699	2.62758e-05	0.0257538	ENSMUSG00000026051	-0.845694	2.19976	14.9274	0.000111727	0.0288391	ENSMUSG00000033685	-0.560112	4.647	24.0418	9.42688e-07	0.000942437	ENSMUSG00000023032	0.121926	7.48423	17.9277	2.29458e-05	0.0227301	ENSMUSG00000022371	-1.48419	6.53142	56.7345	4.98811e-14	4.53456e-11	ENSMUSG00000001025	-0.59075	5.66614	29.4212	5.82384e-08	5.31367e-05	ENSMUSG00000027901	-0.887287	1.13435	25.1751	5.23537e-07	0.000442971	ENSMUSG00000016194	0.633719	4.64474	43.6892	3.84899e-11	3.52388e-08	ENSMUSG00000028088	3.3641
ENSMUSG00000029875	0.273784	4.54427	17.5107	2.85698e-05	0.0262521	ENSMUSG00000023707	0.214556	5.05946	14.8478	0.000116546	0.0295731	ENSMUSG00000036800	-0.411979	6.50257	23.5696	1.20473e-06	0.00112913	ENSMUSG00000027322	-0.733666	0.227907	17.4194	2.99757e-05	0.0272806	ENSMUSG00000025332	-0.618718	6.31983	56.6093	5.31601e-14	4.53456e-11	ENSMUSG00000094686	-0.776804	4.14063	27.1017	1.93027e-07	0.00016511	ENSMUSG00000022371	-0.872893	4.83045	25.1723	5.24303e-07	0.000442971	ENSMUSG00000004105	-0.365142	6.67209	41.2085	1.36828e-10	1.17441e-07	ENSMUSG00000032854	3.33567
ENSMUSG00000025386	-1.10201	0.129506	17.2959	3.19876e-05	0.0276637	ENSMUSG00000034949	0.224834	5.96223	14.736	0.00012366	0.0303529	ENSMUSG00000036198	0.463706	3.14061	23.1673	1.48503e-06	0.00130997	ENSMUSG00000018470	0.228261	6.42263	17.3426	3.12114e-05	0.0272806	ENSMUSG00000027499	0.518925	7.87986	55.5386	9.1641e-14	7.35715e-11	ENSMUSG00000024190	-0.65825	5.68132	25.9368	3.5278e-07	0.000284008	ENSMUSG00000067149	-5.07237	4.57465	25.0306	5.64283e-07	0.000448705	ENSMUSG00000052504	-1.46395	0.582788	38.2518	6.21785e-10	5.02293e-07	ENSMUSG00000005268	-5.41698
ENSMUSG00000056055	-0.866577	0.813183	17.124	3.50169e-05	0.028601	ENSMUSG00000028497	-0.506163	2.15159	14.7063	0.000125628	0.0303529	ENSMUSG00000035238	-0.7219	0.917572	23.0078	1.61347e-06	0.0013442	ENSMUSG00000021390	-0.430548	4.22716	16.9402	3.85762e-05	0.030281	ENSMUSG00000051864	0.391833	5.09361	54.4262	1.61396e-13	1.22374e-10	ENSMUSG00000039646	-0.58591	3.95458	23.6396	1.16172e-06	0.000883294	ENSMUSG00000055653	-0.567244	2.85687	24.6873	6.7428e-07	0.000506384	ENSMUSG00000027797	-0.662324	2.9135	37.6501	8.46408e-10	6.19531e-07	ENSMUSG00000028132	1.71057
ENSMUSG00000026519	0.338928	4.89284	16.7833	4.18995e-05	0.0324214	ENSMUSG00000045273	2.53569	0.917685	14.6633	0.000128521	0.0303529	ENSMUSG00000047793	-0.522863	5.69821	21.8861	2.89318e-06	0.00223413	ENSMUSG00000041353	-0.156699	4.27567	16.8771	3.988e-05	0.030281	ENSMUSG00000020427	-1.03265	6.37974	49.8018	1.70085e-12	1.22175e-09	ENSMUSG00000036545	-0.393173	4.70603	22.9929	1.62603e-06	0.00117126	ENSMUSG00000027188	-0.725018	2.29283	24.513	7.38098e-07	0.000525137	ENSMUSG00000071984	-0.723325	4.86238	37.6256	8.5714e-10	6.19531e-07	ENSMUSG00000030945	2.46998
ENSMUSG00000062980	-0.318952	3.20647	16.1881	5.73546e-05	0.0421614	ENSMUSG00000029661	-0.635585	4.56344	14.6564	0.000128996	0.0303529	ENSMUSG00000057455	-0.509148	6.17725	21.7787	3.05984e-06	0.00223413	ENSMUSG00000033597	0.147498	7.46843	16.8358	4.07578e-05	0.030281	ENSMUSG00000080316	-0.742342	4.04593	49.2916	2.20608e-12	1.50543e-09	ENSMUSG00000068877	-0.850324	2.6188	22.75	1.84504e-06	0.00126256	ENSMUSG00000043008	-0.516514	3.4728	23.8798	1.02541e-06	0.000693075	ENSMUSG00000039646	-0.581483	4.05353	33.1618	8.48018e-09	5.82291e-06	ENSMUSG00000027967	9.99149
						ENSMUSG00000034616	0.198647	5.14184	14.6296	0.000130842	0.0303529	ENSMUSG00000033781	-0.329631	5.74171	21.736	3.12861e-06	0.00223413	ENSMUSG00000040569	-0.596027	2.97352	16.5422	4.75794e-05	0.0336658	ENSMUSG00000028600	-1.19498	5.68673	48.4057	3.46555e-12	2.25228e-09	ENSMUSG00000001119	-0.44345	6.78333	22.3502	2.27195e-06	0.00148066	ENSMUSG00000033715	-0.660728	1.4994	23.0371	1.58908e-06	0.00102291	ENSMUSG00000030116	-0.593387	4.42076	32.5194	1.18009e-08	7.56837e-06	ENSMUSG00000038094	-9.88202
						ENSMUSG00000040557	-0.662284	2.26467	14.6161	0.000131784	0.0303529	ENSMUSG00000026888	-0.434906	4.3927	21.4052	3.71765e-06	0.00253409	ENSMUSG00000007033	-0.801054	-0.688772	16.2879	5.44115e-05	0.0358388	ENSMUSG00000061780	-3.18027	5.19845	44.934	2.03787e-11	1.26422e-08	ENSMUSG00000026043	-0.493541	8.32713	22.0884	2.60375e-06	0.00161977	ENSMUSG00000025255	-1.24989	-0.417398	21.9378	2.8163e-06	0.00173049	ENSMUSG00000025784	-0.763806	6.26355	32.4668	1.21244e-08	7.56837e-06	ENSMUSG00000037347	3.43327
						ENSMUSG00000011589	0.178712	5.1314	14.5505	0.000136449	0.0309512	ENSMUSG00000034177	-0.470832	2.19653	21.2614	4.00711e-06	0.00261264	ENSMUSG00000020836	0.23881	5.63409	16.2512	5.54743e-05	0.0358388	ENSMUSG00000028156	0.519694	7.01889	44.1826	2.99121e-11	1.77496e-08	ENSMUSG00000060586	2.20933	3.72587	21.6933	3.19903e-06	0.00190356	ENSMUSG00000019986	-0.391964	4.32908	21.767	3.07846e-06	0.00180933	ENSMUSG00000040370	0.47555	6.2121	31.4056	2.09379e-08	1.21679e-05	ENSMUSG00000020839	2.19099
						ENSMUSG00000027466	0.173864	6.20224	14.4896	0.000140934	0.0310289	ENSMUSG00000035245	-0.333653	4.5926	21.1358	4.27849e-06	0.00267335	ENSMUSG00000029674	0.245418	6.44801	15.9402	6.53766e-05	0.0389688	ENSMUSG00000003849	0.642411	5.39377	43.6756	3.87566e-11	2.20396e-08	ENSMUSG00000029661	-0.380793	6.87071	21.3091	3.90864e-06	0.0022289	ENSMUSG00000047261	-1.129	0.374993	21.264	4.00186e-06	0.00225405	ENSMUSG00000032011	-0.566748	4.50341	31.3755	2.12649e-08	1.21679e-05	ENSMUSG00000090171	-4.63352
						ENSMUSG00000004933	0.379928	7.05739	14.4896	0.000140937	0.0310289	ENSMUSG00000061353	-0.389696	6.11869	20.3517	6.44351e-06	0.00386508	ENSMUSG00000057396	-0.220252	3.27396	15.9062	6.6559e-05	0.0389688	ENSMUSG00000028223	0.536942	8.3955	42.6429	6.57036e-11	3.58689e-08	ENSMUSG00000031239	-0.513275	3.66227	20.7115	5.33955e-06	0.00292308	ENSMUSG00000022878	-2.84556	2.73291	21.0964	4.36755e-06	0.00236162	ENSMUSG00000020427	-0.807207	6.01181	29.6578	5.15439e-08	2.83141e-05	ENSMUSG00000029311	2.28043
						ENSMUSG00000026043	-0.716976	3.61776	14.417	0.000146477	0.031428	ENSMUSG00000041720	0.154176	8.32518	19.8867	8.21702e-06	0.00473932	ENSMUSG00000036046	0.154989	7.53465	15.798	7.04773e-05	0.0389688	ENSMUSG00000027797	-0.937165	3.01185	40.9565	1.55654e-10	8.17065e-08	ENSMUSG00000061780	-1.78472	4.40349	20.3256	6.532e-06	0.00332855	ENSMUSG00000025479	-2.29874	2.21984	20.6637	5.47453e-06	0.00271489	ENSMUSG00000033436	-0.426528	3.87309	28.8547	7.80143e-08	4.12066e-05	ENSMUSG00000025221	-2.71654
						ENSMUSG00000043843	0.217693	5.69207	14.4023	0.00014762	0.031428	ENSMUSG00000021270	0.150847	10.0249	19.7637	8.7633e-06	0.0048672	ENSMUSG00000022791	0.135319	8.06701	15.7891	7.08095e-05	0.0389688	ENSMUSG00000001604	0.537881	5.80293	39.9447	2.61251e-10	1.32057e-07	ENSMUSG00000052504	-1.0749	0.0744588	20.3155	6.56663e-06	0.00332855	ENSMUSG00000021922	-2.30316	0.59439	20.6348	5.55781e-06	0.00271489	ENSMUSG00000038112	-1.38726	-0.621375	28.7588	8.19784e-08	4.16966e-05	ENSMUSG00000041708	8.90263
						ENSMUSG00000040254	-0.399223	4.12519	14.3842	0.000149047	0.031428	ENSMUSG00000034732	-0.62873	0.968775	19.3353	1.09661e-05	0.00573901	ENSMUSG00000021750	-0.230028	8.21075	15.6088	7.78899e-05	0.0413345	ENSMUSG00000027907	-0.668913	5.41503	39.3005	3.63344e-10	1.77104e-07	ENSMUSG00000032243	-0.711525	2.65106	19.953	7.93706e-06	0.00387952	ENSMUSG00000027224	-1.21198	-0.203293	20.6123	5.62339e-06	0.00271489	ENSMUSG00000028600	-0.795197	5.3813	28.3584	1.00808e-07	4.94426e-05	ENSMUSG00000072944	-3.51203
						ENSMUSG00000040690	0.429192	4.75432	14.2435	0.000160616	0.0333971	ENSMUSG00000033730	0.469892	6.51595	19.2932	1.12106e-05	0.00573901	ENSMUSG00000050357	0.140687	5.66643	15.2504	9.41572e-05	0.0465588	ENSMUSG00000022636	-1.11822	2.92828	38.8096	4.67221e-10	2.19884e-07	ENSMUSG00000019278	0.546322	5.99399	19.5669	9.71375e-06	0.00458422	ENSMUSG00000036103	-0.391991	4.84513	20.3803	6.34806e-06	0.00284164	ENSMUSG00000041120	-0.674393	4.65246	27.6284	1.47004e-07	6.96138e-05	ENSMUSG00000070695	11.837
						ENSMUSG00000066191	0.308352	3.74201	14.2004	0.000164331	0.0335384	ENSMUSG00000030352	-0.440518	7.35926	19.2477	1.14811e-05	0.00573901	ENSMUSG00000011751	0.15569	7.98454	15.2193	9.57179e-05	0.0465588	ENSMUSG00000030116	-0.623116	4.517	38.6391	5.0987e-10	2.31957e-07	ENSMUSG00000017446	-0.452989	4.33988	19.3334	1.09768e-05	0.0050076	ENSMUSG00000027559	-2.49242	4.66098	20.3685	6.38732e-06	0.00284164	ENSMUSG00000039519	-0.668345	0.156878	26.146	3.16556e-07	0.000144909	ENSMUSG00000042498	-2.78127
						ENSMUSG00000071302	-0.257547	4.62163	14.1755	0.000166528	0.0335384	ENSMUSG00000079465	-0.486847	1.45419	19.1316	1.22007e-05	0.005902	ENSMUSG00000028949	0.140947	5.78062	15.18	9.77327e-05	0.0465588	ENSMUSG00000030972	1.29116	3.1361	38.4594	5.59055e-10	2.46128e-07	ENSMUSG00000031740	-0.404124	6.09645	19.2491	1.14724e-05	0.0050649	ENSMUSG00000023078	-4.42973	2.87309	20.3302	6.51656e-06	0.00284164	ENSMUSG00000056770	0.214866	6.79949	25.8507	3.68876e-07	0.000163412	ENSMUSG00000034159	-3.53339
						ENSMUSG00000037843	0.288629	5.17473	14.1587	0.000168017	0.0335384	ENSMUSG00000026029	-0.771147	0.840015	19.0159	1.29634e-05	0.00607499	ENSMUSG00000038990	0.157856	5.2496	15.1317	0.000100268	0.0465588	ENSMUSG00000036879	0.468134	6.11665	36.7371	1.35181e-09	5.76547e-07	ENSMUSG00000032011	-0.555415	4.55569	19.0233	1.29134e-05	0.00552292	ENSMUSG00000026109	-0.886404	0.715526	20.1819	7.04176e-06	0.0029747	ENSMUSG00000037685	0.350487	5.93946	25.6527	4.08728e-07	0.000175408	ENSMUSG00000026141	7.28703
						ENSMUSG00000060275	0.225583	3.86916	14.0958	0.000173727	0.0339214	ENSMUSG00000037306	-0.679995	4.48929	18.9215	1.36212e-05	0.0061898	ENSMUSG00000028497	-0.36786	2.0804	14.955	0.000110109	0.0495789	ENSMUSG00000041120	-0.897245	4.84153	36.3574	1.64252e-09	6.74765e-07	ENSMUSG00000020676	1.28297	1.70295	18.9208	1.36259e-05	0.00565104	ENSMUSG00000003882	-1.07249	0.999651	19.9562	7.92379e-06	0.00324587	ENSMUSG00000057719	0.658678	4.85313	25.1173	5.39472e-07	0.000224502	ENSMUSG00000075033	-2.68184
						ENSMUSG00000021290	-0.195686	6.12383	14.0815	0.000175055	0.0339214	ENSMUSG00000032289	-0.412156	3.8151	18.8188	1.43744e-05	0.00633995	ENSMUSG00000059482	-0.141787	5.42233	14.885	0.000114267	0.0499382	ENSMUSG00000028383	0.444099	8.17484	36.3123	1.68098e-09	6.74765e-07	ENSMUSG00000045672	-0.680364	2.57061	18.6777	1.54781e-05	0.00623038	ENSMUSG00000020681	0.571597	4.96375	19.8893	8.20597e-06	0.0032626	ENSMUSG00000041353	-0.462067	2.07333	24.9874	5.77072e-07	0.000233086	ENSMUSG00000030935	7.46579
						ENSMUSG00000039481	0.535041	1.13	14.0474	0.000178257	0.0339214	ENSMUSG00000040648	0.233438	5.69466	18.6897	1.53815e-05	0.00659031							ENSMUSG00000021319	-1.36794	0.151431	35.7349	2.26083e-09	8.71785e-07	ENSMUSG00000043832	1.21167	2.43224	18.3628	1.82584e-05	0.00713919	ENSMUSG00000023885	-0.369406	5.43671	19.7803	8.68729e-06	0.00328683	ENSMUSG00000001025	-0.565785	5.80996	24.5643	7.18715e-07	0.000282003	ENSMUSG00000044667	-2.07662
						ENSMUSG00000053137	0.288345	4.4879	14.0396	0.000178999	0.0339214	ENSMUSG00000036972	-0.472932	4.34801	18.4353	1.75775e-05	0.007322							ENSMUSG00000026442	-1.46097	0.898461	35.7018	2.29955e-09	8.71785e-07	ENSMUSG00000025784	-0.906535	6.07882	18.3093	1.87791e-05	0.00713919	ENSMUSG00000044595	0.876426	1.21128	19.7302	8.91829e-06	0.00328683	ENSMUSG00000023169	-0.812033	4.5022	24.2348	8.5279e-07	0.000325316	ENSMUSG00000021081	-2.52085
						ENSMUSG00000026674	-0.474805	4.9098	13.9784	0.00018492	0.0341408	ENSMUSG00000026775	0.179155	6.7902	18.2884	1.89862e-05	0.00767277							ENSMUSG00000023169	-1.2824	4.69447	35.5929	2.43177e-09	8.96995e-07	ENSMUSG00000026879	-0.518567	10.5835	18.1135	2.08122e-05	0.00769825	ENSMUSG00000020205	0.68553	4.68398	19.7135	8.99635e-06	0.00328683	ENSMUSG00000012705	-1.84392	1.63471	24.1681	8.82812e-07	0.000327666	ENSMUSG00000024795	3.80859
						ENSMUSG00000044976	-0.880592	-0.619255	13.9696	0.000185795	0.0341408	ENSMUSG00000036256	-0.286712	3.57274	18.2431	1.94429e-05	0.00767277							ENSMUSG00000027070	-1.41434	3.68837	35.5176	2.52758e-09	9.07801e-07	ENSMUSG00000020241	-0.493344	6.92575	17.8427	2.39933e-05	0.00864139	ENSMUSG00000056481	-0.615079	2.80207	19.1247	1.22449e-05	0.00435597	ENSMUSG00000059146	-1.11805	1.76969	24.0943	9.17292e-07	0.000331504	ENSMUSG00000024921	1.50044
						ENSMUSG00000024248	0.40689	5.88655	13.9574	0.000186998	0.0341408	ENSMUSG00000091636	-0.218449	4.26297	17.8362	2.40754e-05	0.00905744							ENSMUSG00000059714	0.407946	6.97155	35.4381	2.63287e-09	9.21369e-07	ENSMUSG00000070469	-0.530861	3.96879	17.6272	2.68718e-05	0.00942995	ENSMUSG00000035183	-0.717479	1.49681	18.7547	1.48654e-05	0.00515258	ENSMUSG00000007682	-0.851738	1.44046	23.5608	1.2103e-06	0.000426182	ENSMUSG00000028937	-2.91426
						ENSMUSG00000039109	-0.639361	3.05164	13.8474	0.000198275	0.0353576	ENSMUSG00000050700	-0.566758	2.55719	17.8296	2.41596e-05	0.00905744							ENSMUSG00000041895	0.508649	6.91862	35.3739	2.72106e-09	9.28425e-07	ENSMUSG00000045680	-0.637916	3.50646	17.5052	2.86524e-05	0.00980344	ENSMUSG00000061780	-2.84767	5.4659	18.6545	1.56675e-05	0.00525649	ENSMUSG00000022636	-0.778842	2.81979	23.4643	1.27255e-06	0.000436898	ENSMUSG00000041220	-2.13061
						ENSMUSG00000024220	0.22056	6.31664	13.8312	0.000199992	0.0353576	ENSMUSG00000028589	-1.45041	-0.888531	17.5266	2.83317e-05	0.0103625							ENSMUSG00000040370	0.673399	6.25539	35.2412	2.9129e-09	9.6964e-07	ENSMUSG00000017897	0.966341	0.544805	17.4579	2.93746e-05	0.0098054	ENSMUSG00000004552	-1.18218	0.763503	18.6213	1.59429e-05	0.00525649	ENSMUSG00000026042	-0.333706	5.8984	23.1846	1.47172e-06	0.000492955	ENSMUSG00000056328	-8.11685
						ENSMUSG00000090258	-0.49175	1.82031	13.8241	0.000200748	0.0353576	ENSMUSG00000030319	-0.293777	2.8617	17.134	3.48335e-05	0.0124372							ENSMUSG00000018927	-0.692772	4.31038	34.5317	4.19374e-09	1.36277e-06	ENSMUSG00000042436	-0.646902	3.5678	17.2946	3.20091e-05	0.0101341	ENSMUSG00000052974	-2.24874	0.998814	18.4205	1.77144e-05	0.00570151	ENSMUSG00000033624	0.411776	6.71151	22.9851	1.63259e-06	0.000533819	ENSMUSG00000025790	1.87565
						ENSMUSG00000061544	-0.29196	3.14179	13.7902	0.000204404	0.035583	ENSMUSG00000045624	0.212525	4.93296	16.9651	3.80731e-05	0.0132778							ENSMUSG00000004360	1.36793	0.416701	34.2364	4.88075e-09	1.54913e-06	ENSMUSG00000060923	-0.47918	6.56855	17.2676	3.24669e-05	0.0101341	ENSMUSG00000024084	-0.513803	2.55639	18.3567	1.83178e-05	0.00575859	ENSMUSG00000063594	-1.04543	0.73813	22.8888	1.71647e-06	0.000548193	ENSMUSG00000026638	1.27519
						ENSMUSG00000026959	0.168919	8.81301	13.7257	0.000211543	0.0364024	ENSMUSG00000024647	0.396379	5.25809	16.8993	3.94158e-05	0.0134336							ENSMUSG00000033420	-0.682359	4.96613	34.1674	5.05695e-09	1.56857e-06	ENSMUSG00000067780	-0.562131	2.7594	17.261	3.25807e-05	0.0101341	ENSMUSG00000036446	-0.550067	6.60685	18.2422	1.94518e-05	0.00597614	ENSMUSG00000029330	0.723427	4.84076	22.6526	1.94098e-06	0.000605806	ENSMUSG00000039878	-2.66481
						ENSMUSG00000022194	0.177957	6.08879	13.6907	0.000215524	0.0364894	ENSMUSG00000027270	0.321277	6.85114	16.7543	4.25457e-05	0.0141781							ENSMUSG00000078532	1.08939	2.19992	34.1108	5.20612e-09	1.57896e-06	ENSMUSG00000029330	0.780625	4.80755	17.1336	3.4841e-05	0.0105963	ENSMUSG00000071984	-0.668126	4.80872	18.0895	2.10759e-05	0.0062266	ENSMUSG00000037624	0.584552	1.93318	22.5729	2.02322e-06	0.000617441	ENSMUSG00000028780	1.45137
						ENSMUSG00000041354	0.26057	5.25567	13.6785	0.000216923	0.0364894	ENSMUSG00000016409	-0.350547	4.1666	16.4763	4.92625e-05	0.0160596							ENSMUSG00000027840	-1.51299	2.30396	34.0235	5.44507e-09	1.61553e-06	ENSMUSG00000004105	-0.352432	6.68267	16.9597	3.81819e-05	0.0113599	ENSMUSG00000027797	-0.613082	3.38099	18.0794	2.11883e-05	0.0062266	ENSMUSG00000036545	-0.467348	4.97239	21.9581	2.78674e-06	0.000831963	ENSMUSG00000057933	-4.53869
						ENSMUSG00000037254	-0.818708	3.65244	13.6059	0.000225481	0.0374326	ENSMUSG00000045268	-0.351697	2.37764	16.3903	5.15479e-05	0.0164471							ENSMUSG00000036334	-0.65004	3.81888	33.2171	8.24207e-09	2.39336e-06	ENSMUSG00000045658	0.443877	3.69856	16.8534	4.03801e-05	0.0117584	ENSMUSG00000013584	-0.547675	3.76685	17.6236	2.69229e-05	0.00774349	ENSMUSG00000028047	-0.494477	3.86812	21.6666	3.24394e-06	0.000947851	ENSMUSG00000039710	-7.72715
						ENSMUSG00000016024	-0.672304	2.76797	13.5798	0.000228635	0.0374326	ENSMUSG00000036578	0.199614	4.63849	16.2982	5.41165e-05	0.0166678							ENSMUSG00000025784	-0.636725	6.42303	32.9627	9.39434e-09	2.67112e-06	ENSMUSG00000026390	2.57114	0.589722	16.6859	4.41077e-05	0.0125762	ENSMUSG00000037725	-1.13105	0.469105	17.5162	2.84868e-05	0.00802261	ENSMUSG00000075408	1.22461	0.837423	21.5182	3.50493e-06	0.000997347	ENSMUSG00000010048	1.55659
						ENSMUSG00000037362	-0.330813	6.54823	13.5655	0.000230378	0.0374326	ENSMUSG00000022055	0.193633	9.01284	16.2861	5.44626e-05	0.0166678							ENSMUSG00000046807	-1.35346	2.1618	32.8109	1.01576e-08	2.8121e-06	ENSMUSG00000031273	-0.429192	2.9493	16.6296	4.54361e-05	0.0126906	ENSMUSG00000046532	-0.387848	3.59289	17.4544	2.94286e-05	0.00804195	ENSMUSG00000004360	1.21818	-0.0897069	21.489	3.55858e-06	0.000997347	ENSMUSG00000030934	-1.59414
						ENSMUSG00000021760	-0.543611	2.71233	13.5481	0.000232532	0.0374326	ENSMUSG00000050619	-0.600524	2.27795	16.24	5.58043e-05	0.0167368							ENSMUSG00000028047	-0.698846	4.08294	32.7834	1.03022e-08	2.8121e-06	ENSMUSG00000026548	1.66643	1.8393	16.5594	4.71485e-05	0.0129055	ENSMUSG00000012705	-2.38975	2.2142	17.434	2.97454e-05	0.00804195	ENSMUSG00000048332	-0.242081	6.64711	21.3838	3.75932e-06	0.00103254	ENSMUSG00000028715	-6.35621
						ENSMUSG00000046192	-0.567148	1.12649	13.5117	0.000237083	0.0374805	ENSMUSG00000036281	0.223855	5.57597	16.1634	5.81046e-05	0.0167916							ENSMUSG00000034485	0.46187	6.086	32.7121	1.0687e-08	2.85994e-06	ENSMUSG00000038418	-0.78969	3.72305	16.4936	4.88148e-05	0.0130996	ENSMUSG00000034023	-1.30052	-0.954114	17.2281	3.31492e-05	0.00878649	ENSMUSG00000017446	-0.410076	4.5528	21.158	4.22941e-06	0.00113887	ENSMUSG00000024866	2.05837
						ENSMUSG00000029231	-0.229352	5.7621	13.5023	0.000238276	0.0374805	ENSMUSG00000018830	-0.394083	2.75167	16.1595	5.82263e-05	0.0167916							ENSMUSG00000026755	0.440961	6.3457	32.6379	1.11028e-08	2.91405e-06	ENSMUSG00000020895	-0.535912	2.351	16.2551	5.53599e-05	0.0145703	ENSMUSG00000078868	-1.18337	0.955567	16.6318	4.53842e-05	0.0117982	ENSMUSG00000030495	-1.38161	-0.576939	21.0031	4.58529e-06	0.00120228	ENSMUSG00000015474	1.23787
						ENSMUSG00000002504	0.212123	5.41382	13.4804	0.00024107	0.0374805	ENSMUSG00000028845	-0.531605	2.33368	16.0209	6.26482e-05	0.0174807							ENSMUSG00000063235	0.435531	4.67982	32.5004	1.19168e-08	3.03069e-06	ENSMUSG00000033268	-0.784873	0.536027	16.0198	6.26835e-05	0.0161865	ENSMUSG00000033420	-0.406259	4.57495	16.4063	5.11146e-05	0.0130371	ENSMUSG00000046532	-0.525534	4.06885	20.9804	4.63996e-06	0.00120228	ENSMUSG00000075267	-4.66749
						ENSMUSG00000071076	0.283842	6.89397	13.4666	0.000242843	0.0374805	ENSMUSG00000015342	-0.530606	4.45442	15.9884	6.3731e-05	0.0174807							ENSMUSG00000030046	-1.94983	8.76144	32.4883	1.19913e-08	3.03069e-06	ENSMUSG00000028339	-0.486179	7.03515	15.9449	6.52121e-05	0.0162272	ENSMUSG00000033722	0.281169	6.47226	16.2178	5.64617e-05	0.013882	ENSMUSG00000039496	0.413792	4.86762	20.9409	4.73681e-06	0.00120464	ENSMUSG00000046603	1.13964
						ENSMUSG00000026399	-0.353328	3.28441	13.4233	0.000248517	0.0379648	ENSMUSG00000031226	-0.291982	3.85935	15.9467	6.51515e-05	0.0174807							ENSMUSG00000021710	0.402902	4.20772	32.3336	1.2985e-08	3.1502e-06	ENSMUSG00000041476	-0.259448	8.41929	15.9449	6.52123e-05	0.0162272	ENSMUSG00000030116	-0.534293	3.68304	16.1873	5.73778e-05	0.013882	ENSMUSG00000024299	-0.395299	5.51704	20.8178	5.05106e-06	0.00125939	ENSMUSG00000031441	2.2084
						ENSMUSG00000001910	0.148408	6.81863	13.371	0.000255539	0.0385774	ENSMUSG00000051367	-0.82857	-0.210345	15.943	6.52785e-05	0.0174807							ENSMUSG00000002265	-0.900412	5.84294	32.3106	1.31397e-08	3.1502e-06	ENSMUSG00000001930	-0.395926	6.55475	15.8729	6.77405e-05	0.0165553	ENSMUSG00000028484	-0.249108	5.19952	16.183	5.75078e-05	0.013882	ENSMUSG00000056481	-0.480338	3.93736	20.7795	5.15322e-06	0.00125939	ENSMUSG00000028268	-3.42484
						ENSMUSG00000030316	0.34099	3.61542	13.3554	0.000257681	0.0385774	ENSMUSG00000102752	-0.388203	2.1063	15.747	7.24042e-05	0.0190487							ENSMUSG00000071984	-1.07456	5.0799	32.2874	1.32973e-08	3.1502e-06	ENSMUSG00000025429	0.364237	5.2937	15.6801	7.50083e-05	0.0180099	ENSMUSG00000031725	-2.15894	-0.105732	16.0448	6.18598e-05	0.0146705	ENSMUSG00000031725	-1.97702	0.579718	20.7392	5.26287e-06	0.00125939	ENSMUSG00000028713	3.66998
						ENSMUSG00000020836	0.302369	5.61613	13.3343	0.000260589	0.0386265	ENSMUSG00000032332	-0.383542	4.29257	15.6842	7.48472e-05	0.0190999							ENSMUSG00000038648	-0.77835	6.73026	32.2743	1.33874e-08	3.1502e-06	ENSMUSG00000026042	-0.357659	5.77953	15.4967	8.26478e-05	0.019502	ENSMUSG00000054675	-0.817253	2.57054	15.9776	6.40969e-05	0.014932	ENSMUSG00000022096	-0.459522	5.14415	20.7189	5.3189e-06	0.00125939	ENSMUSG00000066071	6.07053
						ENSMUSG00000029071	0.191165	6.67296	13.3007	0.000265307	0.0388438	ENSMUSG00000063704	-0.42973	1.39993	15.6144	7.76595e-05	0.0190999							ENSMUSG00000040612	-1.11995	4.35518	32.2331	1.36741e-08	3.16312e-06	ENSMUSG00000055541	1.73394	0.695362	14.934	0.000111341	0.0251987	ENSMUSG00000028780	-0.543532	4.75461	15.9268	6.58394e-05	0.014932	ENSMUSG00000031373	-0.844681	1.97874	20.6301	5.5714e-06	0.00129681	ENSMUSG00000023044	1.12623
						ENSMUSG00000071234	0.429415	4.97252	13.2871	0.000267244	0.0388438	ENSMUSG00000029014	0.241321	4.5026	15.605	7.80493e-05	0.0190999							ENSMUSG00000026204	0.998501	2.59169	32.1422	1.43293e-08	3.25944e-06	ENSMUSG00000059146	-0.925139	1.35079	14.9067	0.000112963	0.0251987	ENSMUSG00000019768	-1.34046	0.0754698	15.9143	6.62761e-05	0.014932	ENSMUSG00000036596	-1.18378	-0.0787807	20.4544	6.1069e-06	0.00138091	ENSMUSG00000027820	-1.66503
						ENSMUSG00000022475	0.230721	5.2882	13.2479	0.000272885	0.0390267	ENSMUSG00000025784	-0.574607	3.41767	15.4941	8.27613e-05	0.0190999							ENSMUSG00000023017	-1.77346	0.323709	31.9693	1.56628e-08	3.45509e-06	ENSMUSG00000048126	-0.45925	5.98715	14.8971	0.000113534	0.0251987	ENSMUSG00000020684	0.398909	7.47362	15.8753	6.7655e-05	0.0149928	ENSMUSG00000027386	-1.40237	0.534281	20.3969	6.29317e-06	0.00138091	ENSMUSG00000032047	1.59657
						ENSMUSG00000079105	-0.623993	0.114142	13.2241	0.000276374	0.0390267	ENSMUSG00000031441	-0.267768	6.81899	15.4883	8.30176e-05	0.0190999							ENSMUSG00000033295	-0.743945	5.07736	31.9652	1.56957e-08	3.45509e-06	ENSMUSG00000040026	2.08306	-0.542281	14.8842	0.000114316	0.0251987	ENSMUSG00000029368	-3.43934	2.44563	15.7976	7.0493e-05	0.0153698	ENSMUSG00000026442	-0.987891	0.50396	20.3957	6.29698e-06	0.00138091	ENSMUSG00000075044	-3.41201
						ENSMUSG00000032179	-0.575977	3.11962	13.2136	0.000277928	0.0390267	ENSMUSG00000015355	-0.455986	1.56713	15.4864	8.30992e-05	0.0190999							ENSMUSG00000011008	-1.68943	-0.247305	31.9179	1.60832e-08	3.48418e-06	ENSMUSG00000070424	-0.500349	3.7974	14.8567	0.000115996	0.0251987	ENSMUSG00000034796	0.757917	2.36221	15.7472	7.23966e-05	0.0155342	ENSMUSG00000016494	-0.292938	7.52339	20.3843	6.33489e-06	0.00138091	ENSMUSG00000045215	2.19654
						ENSMUSG00000021981	-0.230013	5.47768	13.2068	0.00027893	0.0390267	ENSMUSG00000038173	-0.483375	3.10579	15.4608	8.42344e-05	0.0190999							ENSMUSG00000026938	-1.20998	2.86998	31.7281	1.7734e-08	3.78177e-06	ENSMUSG00000042476	0.307902	5.36538	14.7636	0.000121865	0.02606	ENSMUSG00000055421	-0.489052	1.71991	15.5145	8.18769e-05	0.0168883	ENSMUSG00000032870	0.277537	5.80204	20.141	7.19396e-06	0.00154367	ENSMUSG00000039653	-3.47952
						ENSMUSG00000036686	0.185274	5.59684	13.168	0.000284777	0.0394758	ENSMUSG00000029546	-0.731174	2.975	15.4594	8.42986e-05	0.0190999							ENSMUSG00000063884	0.538247	6.6981	31.3599	2.14359e-08	4.45126e-06	ENSMUSG00000064360	0.831028	5.07092	14.6665	0.000128305	0.027015	ENSMUSG00000038119	-0.450408	4.44772	15.5102	8.2061e-05	0.0168883	ENSMUSG00000030278	-1.61601	2.96229	19.8469	8.38993e-06	0.0017726	ENSMUSG00000058914	2.41653
						ENSMUSG00000049807	0.21594	6.88607	13.1284	0.000290856	0.0399487	ENSMUSG00000021221	-0.381691	3.99407	15.3686	8.84464e-05	0.0190999							ENSMUSG00000040260	-0.578415	4.4294	31.3512	2.15324e-08	4.45126e-06	ENSMUSG00000035183	-1.0004	1.09975	14.6196	0.000131536	0.027016	ENSMUSG00000000782	-0.857065	1.58749	15.5012	8.2455e-05	0.0168883	ENSMUSG00000022878	-1.70938	3.39453	19.7428	8.85929e-06	0.00182678	ENSMUSG00000041058	1.26694
						ENSMUSG00000001802	0.175258	6.80659	13.0561	0.000302299	0.0405263	ENSMUSG00000027217	-0.502292	2.55167	15.3476	8.9435e-05	0.0190999							ENSMUSG00000039395	0.56496	4.62227	31.3226	2.18519e-08	4.45126e-06	ENSMUSG00000020427	-0.50212	5.57442	14.6093	0.000132257	0.027016	ENSMUSG00000032093	-1.0608	-0.298557	15.3899	8.7455e-05	0.0175045	ENSMUSG00000026043	-0.596212	8.7362	19.7072	9.02593e-06	0.00182678	ENSMUSG00000042410	2.48981
						ENSMUSG00000039672	-0.766852	1.42292	13.0511	0.000303099	0.0405263	ENSMUSG00000028438	-0.41245	1.36679	15.3438	8.96141e-05	0.0190999							ENSMUSG00000039496	0.568944	4.93354	31.0425	2.52442e-08	5.06666e-06	ENSMUSG00000004730	1.32655	4.21101	14.5777	0.000134494	0.0270688	ENSMUSG00000023341	-0.995684	4.56998	15.377	8.80534e-05	0.0175045	ENSMUSG00000029778	-0.597407	3.97527	19.6826	9.1428e-06	0.00182678	ENSMUSG00000058216	6.75253
						ENSMUSG00000048385	0.195499	7.44824	13.0433	0.000304378	0.0405263	ENSMUSG00000031425	-0.459062	9.60312	15.3112	9.11726e-05	0.0190999							ENSMUSG00000054752	0.485663	6.80908	30.917	2.69296e-08	5.32661e-06	ENSMUSG00000001506	-0.588313	6.60408	14.5023	0.000139989	0.0277665	ENSMUSG00000063785	-0.381914	4.60656	15.3281	9.03617e-05	0.017703	ENSMUSG00000025268	-0.33508	5.31227	19.6752	9.17848e-06	0.00182678	ENSMUSG00000054672	6.27005
						ENSMUSG00000026650	-0.632194	0.505374	13.034	0.00030589	0.0405263	ENSMUSG00000054423	0.118721	8.64689	15.3105	9.12104e-05	0.0190999							ENSMUSG00000056367	0.714416	5.19941	30.8094	2.84654e-08	5.54994e-06	ENSMUSG00000041012	-0.511192	2.00568	14.2799	0.00015754	0.0298649	ENSMUSG00000047686	-1.00525	-0.0423351	15.2638	9.3491e-05	0.0178469	ENSMUSG00000042500	0.243218	4.78003	19.5793	9.65109e-06	0.00189341	ENSMUSG00000022742	1.02001
						ENSMUSG00000029166	0.145926	7.23754	12.981	0.000314676	0.0413246	ENSMUSG00000031616	-0.387733	2.02043	15.2933	9.20446e-05	0.0190999							ENSMUSG00000015837	0.419678	8.42938	30.7663	2.91053e-08	5.59478e-06	ENSMUSG00000022096	-0.46759	5.20597	14.2628	0.000158972	0.0298649	ENSMUSG00000022033	-1.05965	-0.0976739	15.2589	9.37363e-05	0.0178469	ENSMUSG00000030224	0.189081	6.63502	19.5094	1.00105e-05	0.00193626	ENSMUSG00000035878	1.64647
						ENSMUSG00000064179	0.667916	2.99425	12.8141	0.000344021	0.0447855	ENSMUSG00000007617	0.46407	7.72135	15.2914	9.21331e-05	0.0190999							ENSMUSG00000006651	-0.952326	3.45396	30.4987	3.34091e-08	6.26049e-06	ENSMUSG00000024044	0.307759	5.3155	14.2616	0.000159081	0.0298649	ENSMUSG00000027513	-2.7902	2.0737	15.1233	0.000100714	0.018909	ENSMUSG00000056367	0.440503	5.258	19.4697	1.02206e-05	0.00194945	ENSMUSG00000033998	-2.15181
						ENSMUSG00000034201	0.192395	5.38302	12.7922	0.000348073	0.0449225	ENSMUSG00000025666	-0.406717	6.62685	15.2742	9.29776e-05	0.0190999							ENSMUSG00000021898	0.545061	6.47945	30.4942	3.34859e-08	6.26049e-06	ENSMUSG00000090698	-0.654477	3.40081	14.259	0.000159297	0.0298649	ENSMUSG00000026355	-0.4516	2.82766	15.0952	0.000102221	0.018929	ENSMUSG00000020785	-0.543694	1.92478	19.3916	1.06475e-05	0.00200304	ENSMUSG00000031958	2.46536
						ENSMUSG00000056665	0.232464	5.00584	12.6839	0.000368823	0.0471936	ENSMUSG00000036273	0.323163	5.65347	15.1633	9.86028e-05	0.0199817							ENSMUSG00000031284	-1.37088	-0.0694502	30.0581	4.19303e-08	7.73331e-06	ENSMUSG00000041353	-0.496677	2.03306	14.2254	0.000162163	0.0299914	ENSMUSG00000005338	-0.614484	2.1054	15.0508	0.000104657	0.0191182	ENSMUSG00000070469	-0.566176	3.75379	19.2944	1.12032e-05	0.00205234	ENSMUSG00000002944	2.62747
						ENSMUSG00000027582	0.199333	6.01898	12.62	0.000381648	0.0484208	ENSMUSG00000052854	-0.957604	2.8471	14.9468	0.000110585	0.0221112							ENSMUSG00000022965	0.434194	7.18315	29.9316	4.47559e-08	8.14438e-06	ENSMUSG00000022372	0.950898	2.54808	14.0576	0.000177298	0.0323533	ENSMUSG00000037944	-0.904299	0.134823	15.016	0.000106604	0.0192143	ENSMUSG00000058997	0.415399	7.9368	19.2745	1.1321e-05	0.00205234	ENSMUSG00000038415	-2.44319
						ENSMUSG00000020467	-0.30919	4.25709	12.5675	0.000392513	0.0487579	ENSMUSG00000029111	-0.194783	4.47876	14.8968	0.000113553	0.0224057							ENSMUSG00000029545	0.545118	7.60488	29.9008	4.54729e-08	8.16597e-06	ENSMUSG00000102428	-0.672497	1.04996	14.0063	0.0001822	0.032457	ENSMUSG00000059049	-0.638157	0.560896	14.7514	0.000122657	0.0218168	ENSMUSG00000027559	-1.6082	5.85186	19.2683	1.13579e-05	0.00205234	ENSMUSG00000059406	3.84167
						ENSMUSG00000071528	-0.146561	6.79303	12.5644	0.000393172	0.0487579	ENSMUSG00000044647	0.172744	6.9292	14.8507	0.000116362	0.0226449							ENSMUSG00000022389	0.505137	6.19754	29.8151	4.75285e-08	8.42426e-06	ENSMUSG00000036446	-0.483464	7.43304	14.0021	0.000182609	0.032457	ENSMUSG00000031342	-0.380293	4.90864	14.7122	0.000125236	0.0219152	ENSMUSG00000080316	-0.429558	4.0144	19.2191	1.16539e-05	0.00207849	ENSMUSG00000057228	-2.18394
						ENSMUSG00000030688	0.160712	5.26614	12.5527	0.000395641	0.0487579	ENSMUSG00000005268	-0.483488	4.9688	14.8278	0.000117785	0.0226449							ENSMUSG00000005628	0.68079	4.14096	29.7301	4.96586e-08	8.68899e-06	ENSMUSG00000028464	-0.376309	4.28726	13.9124	0.000191526	0.0336055	ENSMUSG00000050875	-0.806058	-0.547231	14.6751	0.000127722	0.0219152	ENSMUSG00000039062	-0.646804	4.22282	19.0632	1.26462e-05	0.00222653	ENSMUSG00000033721	-1.10432
						ENSMUSG00000045248	0.26168	2.98912	12.5368	0.000399018	0.0487579	ENSMUSG00000063239	-0.429767	7.20891	14.7887	0.000120257	0.0228274							ENSMUSG00000038312	-0.424875	3.83529	29.658	5.15392e-08	8.90388e-06	ENSMUSG00000012705	-1.45124	0.624262	13.8293	0.000200192	0.0346813	ENSMUSG00000001482	0.218855	6.21078	14.6699	0.000128073	0.0219152	ENSMUSG00000064057	-2.08796	0.303459	18.8637	1.40396e-05	0.00244037	ENSMUSG00000052562	5.87284
						ENSMUSG00000021495	0.166261	6.57745	12.5294	0.00040059	0.0487579	ENSMUSG00000039395	-0.341304	3.66427	14.7266	0.00012428	0.0232962							ENSMUSG00000028988	0.57723	4.98252	29.598	5.31608e-08	9.06924e-06	ENSMUSG00000021519	0.353548	5.3363	13.7262	0.000211487	0.0358522	ENSMUSG00000039901	0.606217	5.52958	14.6242	0.000131221	0.0221731	ENSMUSG00000042476	0.432267	5.287	18.8399	1.42161e-05	0.00244037	ENSMUSG00000025479	3.58978
						ENSMUSG00000043885	0.246114	6.98733	12.4755	0.000412322	0.0497812	ENSMUSG00000090093	0.679939	0.387086	14.6229	0.000131309	0.02431							ENSMUSG00000050288	-0.946265	2.6862	29.5485	5.45356e-08	9.18891e-06	ENSMUSG00000001494	-0.854882	1.15169	13.7199	0.00021219	0.0358522	ENSMUSG00000017499	-1.00616	-0.636453	14.5886	0.000133722	0.0223167	ENSMUSG00000036120	-0.415495	4.74839	18.5665	1.6408e-05	0.00278186	ENSMUSG00000021884	-1.60774
												ENSMUSG00000058488	-0.662947	4.93936	14.5769	0.000134551	0.0245043							ENSMUSG00000031994	-1.8899	3.13583	29.3988	5.89133e-08	9.80546e-06	ENSMUSG00000031561	-0.516529	2.20616	13.6616	0.000218885	0.0365324	ENSMUSG00000020649	-0.661562	1.22443	14.4784	0.000141776	0.0233722	ENSMUSG00000042254	-0.491298	2.5064	18.5072	1.69264e-05	0.00280772	ENSMUSG00000022708	1.78098
												ENSMUSG00000020844	-0.398905	3.91388	14.5477	0.000136656	0.0245043							ENSMUSG00000034327	0.477584	6.21782	29.3055	6.18194e-08	1.01652e-05	ENSMUSG00000040552	0.909971	3.39198	13.5707	0.000229748	0.0378835	ENSMUSG00000037624	0.853529	0.688502	14.4077	0.0001472	0.0239639	ENSMUSG00000020900	-0.265473	6.22421	18.4866	1.71102e-05	0.00280772	ENSMUSG00000033610	1.98018
												ENSMUSG00000029797	-0.449206	2.65009	14.5394	0.000137261	0.0245043							ENSMUSG00000032549	-1.45904	2.58111	28.9642	7.37275e-08	1.1979e-05	ENSMUSG00000037685	0.353571	5.80786	13.4351	0.000246966	0.0402379	ENSMUSG00000027331	-1.02142	-0.378983	14.3859	0.00014891	0.0239639	ENSMUSG00000040850	0.357858	8.66627	18.4795	1.71738e-05	0.00280772	ENSMUSG00000078597	4.2753
												ENSMUSG00000031099	0.22827	5.52243	14.4211	0.000146158	0.0257857							ENSMUSG00000023078	-1.63708	3.32218	28.8751	7.72005e-08	1.23957e-05	ENSMUSG00000044350	0.791097	2.36066	13.3865	0.000253436	0.0408062	ENSMUSG00000047907	0.364837	4.60963	14.3452	0.000152169	0.0242002	ENSMUSG00000022752	0.274665	6.84167	18.3511	1.83716e-05	0.00296821	ENSMUSG00000026389	-1.8458
												ENSMUSG00000055214	-0.552409	3.92328	14.3316	0.00015327	0.0267259							ENSMUSG00000026650	1.43413	-0.175909	28.6322	8.75155e-08	1.38885e-05	ENSMUSG00000033318	-0.327441	4.18478	13.2961	0.000265959	0.0419276	ENSMUSG00000025486	0.216339	5.77799	14.2146	0.000163102	0.024679	ENSMUSG00000038084	0.301501	7.86376	18.1246	2.06911e-05	0.00328383	ENSMUSG00000026110	-1.59661
												ENSMUSG00000027254	0.154437	10.3147	14.3026	0.000155648	0.0268287							ENSMUSG00000025429	0.569146	4.68831	28.5529	9.11726e-08	1.43026e-05	ENSMUSG00000029718	-0.383973	5.44834	13.2921	0.000266528	0.0419276	ENSMUSG00000031538	-0.342367	4.93617	14.2055	0.000163894	0.024679	ENSMUSG00000020895	-0.433421	2.23377	18.1143	2.08034e-05	0.00328383	ENSMUSG00000039682	1.22846
												ENSMUSG00000060519	-0.289739	3.35853	14.2135	0.000163195	0.0278099							ENSMUSG00000031519	0.707016	4.38738	28.4631	9.55036e-08	1.46e-05	ENSMUSG00000045573	0.518002	4.67053	13.0859	0.000297534	0.0462734	ENSMUSG00000032561	-0.881892	-0.589814	14.2037	0.000164048	0.024679	ENSMUSG00000005338	-0.62479	2.36801	18.039	2.16426e-05	0.00337021	ENSMUSG00000030498	1.32108
												ENSMUSG00000032548	-0.650391	2.87475	14.1443	0.000169306	0.028424							ENSMUSG00000032353	-0.376848	5.1166	28.4498	9.61584e-08	1.46e-05	ENSMUSG00000055341	-1.6818	1.15235	13.046	0.000303927	0.0467365	ENSMUSG00000037313	-0.530301	1.10649	14.2025	0.000164154	0.024679	ENSMUSG00000036437	-0.825012	1.15691	18.0111	2.19622e-05	0.00337021	ENSMUSG00000025068	-2.12827
												ENSMUSG00000027864	0.293402	5.71729	14.1301	0.000170589	0.028424							ENSMUSG00000045659	-1.02374	5.10832	28.4474	9.62781e-08	1.46e-05	ENSMUSG00000021091	1.01634	3.48895	12.9675	0.000316941	0.0480965	ENSMUSG00000030278	-2.40816	2.11252	14.2007	0.000164307	0.024679	ENSMUSG00000032085	-0.365173	4.86872	18.0003	2.20868e-05	0.00337021	ENSMUSG00000039385	-1.86159
												ENSMUSG00000026051	-0.65982	2.97665	14.0607	0.000177001	0.0291681							ENSMUSG00000052504	-1.69655	0.989707	28.3293	1.02335e-07	1.5348e-05	ENSMUSG00000050323	0.300136	3.71291	12.9359	0.000322335	0.0480965	ENSMUSG00000037138	-0.689929	1.7958	14.0753	0.000175632	0.0258749	ENSMUSG00000069844	0.229729	4.43228	17.834	2.41035e-05	0.00363751	ENSMUSG00000019767	-2.87307
												ENSMUSG00000043913	-0.692761	-0.0322966	14.0288	0.000180029	0.0291752							ENSMUSG00000029810	-0.831832	5.32138	27.9654	1.23504e-07	1.83216e-05	ENSMUSG00000024299	-0.322728	5.28857	12.9254	0.00032416	0.0480965	ENSMUSG00000050663	-1.08259	-0.511559	14.0704	0.000176098	0.0258749	ENSMUSG00000118667	-0.600325	3.66203	17.6589	2.64274e-05	0.00389694	ENSMUSG00000020182	-1.37179
												ENSMUSG00000018707	0.107101	9.63776	14.0194	0.000180935	0.0291752							ENSMUSG00000031089	-1.69533	-0.375279	27.8436	1.31528e-07	1.93021e-05	ENSMUSG00000042129	0.715055	3.97632	12.91	0.000326829	0.0480965	ENSMUSG00000044783	-0.58864	1.25023	14.0132	0.000181531	0.0263864	ENSMUSG00000021319	-1.00637	-0.253113	17.6343	2.67717e-05	0.00389694	ENSMUSG00000029086	-1.99444
												ENSMUSG00000023224	-0.457446	3.77163	13.9873	0.000184051	0.0293621							ENSMUSG00000035506	-1.48094	0.509551	27.7899	1.3523e-07	1.96342e-05							ENSMUSG00000019883	-0.274799	5.13405	13.9778	0.000184979	0.0266015	ENSMUSG00000031273	-0.634958	3.34548	17.6292	2.68439e-05	0.00389694	ENSMUSG00000039903	-2.67343
												ENSMUSG00000031278	0.174751	6.87871	13.8301	0.000200102	0.0312086							ENSMUSG00000026185	-1.03569	9.46232	27.7189	1.40287e-07	2.0154e-05							ENSMUSG00000026832	-0.913561	1.62303	13.9064	0.000192147	0.0273416	ENSMUSG00000032492	-0.435782	2.45829	17.6211	2.69577e-05	0.00389694	ENSMUSG00000046070	-2.93877
												ENSMUSG00000061665	-0.331899	4.88747	13.7979	0.00020356	0.0312086							ENSMUSG00000031111	1.01027	4.6649	27.6477	1.45545e-07	2.06916e-05							ENSMUSG00000035493	-0.458285	4.96999	13.8554	0.000197429	0.0278005	ENSMUSG00000045875	0.544845	5.32322	17.5421	2.81011e-05	0.00400221	ENSMUSG00000034981	-1.28798
												ENSMUSG00000031954	0.142342	5.96365	13.7977	0.000203583	0.0312086							ENSMUSG00000024143	0.335809	7.33464	27.6129	1.48187e-07	2.085e-05							ENSMUSG00000042436	-0.529266	4.75459	13.8311	0.000199999	0.0278721	ENSMUSG00000030562	-0.621286	1.59498	17.5308	2.82687e-05	0.00400221	ENSMUSG00000045291	-8.73404
												ENSMUSG00000055805	0.21856	6.48343	13.7943	0.000203951	0.0312086							ENSMUSG00000021464	-0.747981	1.66656	27.5338	1.54372e-07	2.14986e-05							ENSMUSG00000030742	-0.975103	-0.238323	13.8002	0.000203314	0.0280448	ENSMUSG00000052974	-2.4603	0.502778	17.4717	2.91617e-05	0.0040865	ENSMUSG00000025724	1.0296
												ENSMUSG00000050541	0.407608	3.63698	13.7268	0.000211419	0.0320247							ENSMUSG00000025920	0.519351	6.347	27.3832	1.66874e-07	2.3005e-05							ENSMUSG00000044770	-0.627724	1.02437	13.7117	0.000213126	0.0291014	ENSMUSG00000045983	0.217301	8.89105	17.4487	2.95163e-05	0.00409442	ENSMUSG00000079042	-1.20421
												ENSMUSG00000053930	-0.390238	6.31733	13.6065	0.000225401	0.0338012							ENSMUSG00000040136	-0.575306	5.86763	27.3151	1.72857e-07	2.35915e-05							ENSMUSG00000055546	-1.51408	1.46177	13.6597	0.000219112	0.0296196	ENSMUSG00000001864	-0.572827	2.04704	17.3175	3.16264e-05	0.00429929	ENSMUSG00000020805	3.58933
												ENSMUSG00000026360	0.245533	5.19521	13.5426	0.000233215	0.0341091							ENSMUSG00000034687	-1.5015	3.50924	27.0783	1.95377e-07	2.6401e-05							ENSMUSG00000025092	0.379958	6.41408	13.6	0.000226184	0.0302728	ENSMUSG00000026259	-0.939805	-0.439761	17.2834	3.21989e-05	0.00429929	ENSMUSG00000039934	1.35169
												ENSMUSG00000026975	-0.215256	4.30037	13.5406	0.000233455	0.0341091							ENSMUSG00000024754	-0.738161	5.50267	26.9948	2.04007e-07	2.7239e-05							ENSMUSG00000029174	-0.391395	5.28264	13.3789	0.000254472	0.0334128	ENSMUSG00000069763	-0.62655	3.68784	17.2697	3.24321e-05	0.00429929	ENSMUSG00000038009	1.4671
												ENSMUSG00000042284	-0.353053	2.96422	13.534	0.000234278	0.0341091							ENSMUSG00000027386	-1.75582	1.1262	26.98	2.0557e-07	2.7239e-05							ENSMUSG00000031283	-0.824551	1.76567	13.378	0.000254588	0.0334128	ENSMUSG00000004070	0.206142	5.67749	17.2605	3.25885e-05	0.00429929	ENSMUSG00000030759	1.21239
												ENSMUSG00000027861	-0.548226	3.25978	13.504	0.000238059	0.0343262							ENSMUSG00000040850	0.542099	8.60122	26.9021	2.14028e-07	2.8087e-05							ENSMUSG00000000384	0.222048	5.87968	13.319	0.000262728	0.0338762	ENSMUSG00000023017	-1.29669	-0.237123	17.2501	3.27682e-05	0.00429929	ENSMUSG00000043681	-3.26652
												ENSMUSG00000001506	-0.548199	3.37182	13.4547	0.000244393	0.034904							ENSMUSG00000026043	-0.661618	9.06395	26.8611	2.18613e-07	2.84155e-05							ENSMUSG00000038248	0.312559	4.47768	13.3151	0.000263275	0.0338762	ENSMUSG00000038205	0.33967	6.16849	17.2441	3.28716e-05	0.00429929	ENSMUSG00000041052	6.92616
												ENSMUSG00000026805	-0.59825	2.27213	13.4324	0.000247309	0.0349872							ENSMUSG00000030082	-0.412194	6.09593	26.6827	2.3976e-07	3.08694e-05							ENSMUSG00000026249	0.378865	5.3474	13.2956	0.00026603	0.0338762	ENSMUSG00000064345	0.410195	13.1591	16.9321	3.87406e-05	0.0050102	ENSMUSG00000038515	1.03759
												ENSMUSG00000030708	-0.477034	0.886862	13.3904	0.000252922	0.035271							ENSMUSG00000005774	-0.517096	3.54657	26.6646	2.42015e-07	3.08694e-05							ENSMUSG00000029121	-0.711526	-0.339408	13.2743	0.000269069	0.0338762	ENSMUSG00000041895	0.335009	6.71265	16.9097	3.92009e-05	0.0050102	ENSMUSG00000022040	1.94358
												ENSMUSG00000022629	0.129354	8.09771	13.3819	0.000254066	0.035271							ENSMUSG00000027765	0.594689	5.06967	26.5763	2.53329e-07	3.20133e-05							ENSMUSG00000032243	-0.422053	2.41092	13.2633	0.000270649	0.0338762	ENSMUSG00000096606	-0.542098	2.70402	16.9	3.94016e-05	0.0050102	ENSMUSG00000022445	-1.86041
												ENSMUSG00000042788	-0.681662	0.806317	13.3569	0.000257479	0.035271							ENSMUSG00000045934	-0.663522	2.78144	26.5384	2.58354e-07	3.2121e-05							ENSMUSG00000032412	-0.219182	6.1594	13.1948	0.000280726	0.0348152	ENSMUSG00000026610	0.3035	5.8513	16.6998	4.37852e-05	0.00551653	ENSMUSG00000038497	1.19648
												ENSMUSG00000032667	-0.244459	4.44324	13.3478	0.000258723	0.035271							ENSMUSG00000019139	-0.393724	5.04599	26.5344	2.58888e-07	3.2121e-05							ENSMUSG00000027347	-1.03345	0.80639	13.1073	0.000294149	0.0361483	ENSMUSG00000030782	-0.401331	4.48892	16.6668	4.45536e-05	0.0055265	ENSMUSG00000054757	-3.81431
												ENSMUSG00000032845	-0.655821	0.0863508	13.3003	0.00026537	0.0355408							ENSMUSG00000039062	-0.846059	4.54119	26.3753	2.81108e-07	3.45637e-05							ENSMUSG00000026399	-0.624536	3.68284	13.063	0.00030119	0.0366801	ENSMUSG00000039048	0.273396	6.32949	16.6619	4.46691e-05	0.0055265	ENSMUSG00000047719	0.94362
												ENSMUSG00000005907	-0.546123	5.83457	13.2997	0.000265442	0.0355408							ENSMUSG00000026875	-1.05268	2.04609	26.2889	2.93967e-07	3.58219e-05							ENSMUSG00000000884	0.365174	3.54198	13.0449	0.000304116	0.0367058	ENSMUSG00000022090	-0.48987	3.35995	16.6142	4.58057e-05	0.0055916	ENSMUSG00000039648	1.30896
												ENSMUSG00000033088	-0.437656	3.51654	13.2671	0.000270111	0.0358458							ENSMUSG00000031708	0.572354	8.0564	26.1371	3.18022e-07	3.84103e-05							ENSMUSG00000026956	-0.472184	2.58351	13.0203	0.000308136	0.0368618	ENSMUSG00000031985	0.250405	8.03445	16.6058	4.60097e-05	0.0055916	ENSMUSG00000063683	1.15626
												ENSMUSG00000041836	-0.386825	5.36036	13.1426	0.000288653	0.0379706							ENSMUSG00000027961	0.461649	6.99708	25.6849	4.01956e-07	4.81219e-05							ENSMUSG00000026875	-1.06858	0.956898	12.8944	0.000329571	0.0385353	ENSMUSG00000034612	-0.350715	2.96526	16.5151	4.82641e-05	0.00581413	ENSMUSG00000026866	-2.64985
												ENSMUSG00000027878	-0.363501	5.36495	13.084	0.000297833	0.0386728							ENSMUSG00000003352	-0.722337	2.90691	25.6632	4.06504e-07	4.82431e-05							ENSMUSG00000031004	-1.16825	2.54745	12.8887	0.000330566	0.0385353	ENSMUSG00000032479	0.271543	9.02901	16.4005	5.12717e-05	0.00610618	ENSMUSG00000032092	-1.22502
												ENSMUSG00000047250	-0.23105	3.55204	13.0757	0.000299149	0.0386728							ENSMUSG00000043110	-1.21285	5.13755	25.4752	4.48111e-07	5.26331e-05							ENSMUSG00000015880	-1.12845	-0.404846	12.8881	0.000330677	0.0385353	ENSMUSG00000030876	0.241456	6.05014	16.3892	5.15777e-05	0.00610618	ENSMUSG00000023092	1.10452
												ENSMUSG00000026587	0.164391	8.41642	13.0528	0.000302832	0.0388142							ENSMUSG00000020935	0.656283	5.19907	25.4519	4.53562e-07	5.26331e-05							ENSMUSG00000042148	0.248957	6.24588	12.8607	0.00033555	0.038769	ENSMUSG00000040312	-0.39752	2.34598	16.3209	5.34708e-05	0.00617276	ENSMUSG00000040640	2.16771
												ENSMUSG00000035305	-0.414926	2.3134	12.9384	0.000321908	0.0406389							ENSMUSG00000055493	0.419978	5.2948	25.4389	4.56624e-07	5.26331e-05							ENSMUSG00000033214	-1.22924	0.266016	12.8379	0.000339669	0.0388184	ENSMUSG00000039787	-0.476216	2.018	16.314	5.36659e-05	0.00617276	ENSMUSG00000031613	-2.12697
												ENSMUSG00000033538	-0.468958	1.52599	12.935	0.000322488	0.0406389							ENSMUSG00000032602	0.379834	7.0303	25.4219	4.6066e-07	5.26331e-05							ENSMUSG00000031189	-0.722022	-0.266327	12.8266	0.000341721	0.0388184	ENSMUSG00000025521	0.285371	3.94613	16.308	5.38373e-05	0.00617276	ENSMUSG00000091650	-5.25303
												ENSMUSG00000026308	-0.643329	1.05824	12.8573	0.000336157	0.0420084							ENSMUSG00000026489	0.4777	9.32458	25.4131	4.62776e-07	5.26331e-05							ENSMUSG00000024056	-1.19218	-0.667117	12.7716	0.000351925	0.0394076	ENSMUSG00000069135	0.292112	4.52314	16.3044	5.3938e-05	0.00617276	ENSMUSG00000038451	1.24545
												ENSMUSG00000022032	-0.543767	0.862116	12.7985	0.0003469	0.0429926							ENSMUSG00000024713	-0.706729	3.1172	25.365	4.74441e-07	5.28506e-05							ENSMUSG00000046618	-0.467855	2.81394	12.7673	0.000352739	0.0394076	ENSMUSG00000028033	-0.933019	1.35903	16.1941	5.71725e-05	0.00644029	ENSMUSG00000072662	3.49395
												ENSMUSG00000047878	-0.563096	1.15995	12.7732	0.000351614	0.0432198							ENSMUSG00000031066	-0.550952	3.95805	25.3506	4.78015e-07	5.28506e-05							ENSMUSG00000036856	-1.04764	-0.410658	12.7305	0.000359731	0.0398594	ENSMUSG00000006005	0.218041	7.45208	16.1565	5.83186e-05	0.00644029	ENSMUSG00000048022	0.912037
												ENSMUSG00000031925	-0.306064	4.29819	12.712	0.00036332	0.0440723							ENSMUSG00000021460	0.497804	6.0734	25.3354	4.8178e-07	5.28506e-05							ENSMUSG00000027201	-0.27664	3.66506	12.6865	0.000368302	0.0403764	ENSMUSG00000034088	0.218746	9.4786	16.1544	5.83837e-05	0.00644029	ENSMUSG00000022366	1.15654
												ENSMUSG00000061603	0.128024	8.4483	12.7063	0.000364428	0.0440723							ENSMUSG00000016349	0.494136	9.77176	25.3339	4.82169e-07	5.28506e-05							ENSMUSG00000051682	-1.19793	-0.445867	12.6696	0.000371657	0.0403764	ENSMUSG00000028080	0.229415	5.62079	16.1485	5.85654e-05	0.00644029	ENSMUSG00000024292	-2.80678
												ENSMUSG00000042834	-0.40998	8.11491	12.5945	0.00038688	0.0464132							ENSMUSG00000050821	0.76263	4.763	25.3264	4.84051e-07	5.28506e-05							ENSMUSG00000017737	-1.03625	0.524499	12.643	0.000376984	0.0403764	ENSMUSG00000020695	-0.319217	5.27314	16.1467	5.86206e-05	0.00644029	ENSMUSG00000042766	-2.45285
												ENSMUSG00000020340	0.139082	9.75361	12.573	0.000391361	0.0465782							ENSMUSG00000022769	-0.870956	3.37712	25.2667	4.99258e-07	5.40783e-05							ENSMUSG00000032254	-0.875576	0.85972	12.6407	0.000377439	0.0403764	ENSMUSG00000001100	0.246168	6.80497	16.0724	6.09652e-05	0.00660425	ENSMUSG00000027016	-1.8593
												ENSMUSG00000020019	-0.258544	5.10619	12.4895	0.000409247	0.0476313							ENSMUSG00000027247	-0.400521	5.27327	25.2392	5.06422e-07	5.43292e-05							ENSMUSG00000075408	1.09966	-0.816168	12.6314	0.000379331	0.0403764	ENSMUSG00000037697	-0.292856	4.49616	16.069	6.10748e-05	0.00660425	ENSMUSG00000017978	-1.11234
												ENSMUSG00000043079	0.26661	6.80027	12.4875	0.000409684	0.0476313							ENSMUSG00000034783	-1.82551	1.3323	25.2274	5.09536e-07	5.43292e-05							ENSMUSG00000030759	-0.213753	5.60441	12.5682	0.000392368	0.0411848	ENSMUSG00000059921	-1.0338	0.343673	16.0379	6.20869e-05	0.00661737	ENSMUSG00000022112	-1.93284
												ENSMUSG00000064329	0.168796	8.19779	12.4787	0.000411623	0.0476313							ENSMUSG00000066113	-1.05059	2.73406	25.1803	5.22135e-07	5.52411e-05							ENSMUSG00000016494	-0.269607	7.15998	12.5538	0.000395405	0.0411848	ENSMUSG00000026205	-0.853329	0.19342	16.0282	6.24044e-05	0.00661737	ENSMUSG00000024646	1.0641
												ENSMUSG00000025780	-0.219053	5.71971	12.4728	0.000412915	0.0476313							ENSMUSG00000027864	-0.425336	6.56985	25.1609	5.27394e-07	5.53682e-05							ENSMUSG00000056870	-0.330471	3.12005	12.5507	0.000396067	0.0411848	ENSMUSG00000021464	-0.660646	1.32082	16.0211	6.26417e-05	0.00661737	ENSMUSG00000027605	1.06966
												ENSMUSG00000021556	-0.353752	4.83257	12.4149	0.000425911	0.0487554							ENSMUSG00000033998	1.57039	1.24628	25.0603	5.55663e-07	5.78907e-05							ENSMUSG00000002820	0.304381	5.52419	12.488	0.000409574	0.0422643	ENSMUSG00000030122	-0.388577	6.48664	15.9582	6.47562e-05	0.00676443	ENSMUSG00000037139	3.71856
												ENSMUSG00000034997	0.450513	4.64833	12.3968	0.00043008	0.0488597							ENSMUSG00000036120	-0.637089	4.90836	25.0448	5.6014e-07	5.7915e-05							ENSMUSG00000030745	-1.21373	0.467661	12.3346	0.00044465	0.0455362	ENSMUSG00000020456	0.329826	11.2263	15.9505	6.50189e-05	0.00676443	ENSMUSG00000037477	4.03499
												ENSMUSG00000031255	0.513026	1.78207	12.3396	0.000443453	0.0492683							ENSMUSG00000004105	-0.373083	6.65347	25.0247	5.66006e-07	5.80816e-05							ENSMUSG00000028917	0.335044	6.99458	12.2931	0.000454628	0.046208	ENSMUSG00000037625	-1.07019	0.383573	15.8762	6.76225e-05	0.00693541	ENSMUSG00000003623	1.32351
												ENSMUSG00000042712	0.143111	5.92792	12.3325	0.000445134	0.0492683							ENSMUSG00000008734	-0.535237	5.4615	24.97	5.82281e-07	5.93057e-05							ENSMUSG00000051041	-0.409771	2.82755	12.1785	0.000483426	0.0487263	ENSMUSG00000044646	-0.528596	2.31231	15.8748	6.76724e-05	0.00693541	ENSMUSG00000021456	-1.77204
												ENSMUSG00000041000	-0.323334	5.69939	12.326	0.000446692	0.0492683							ENSMUSG00000030876	0.350248	6.02981	24.933	5.93564e-07	6.00071e-05							ENSMUSG00000006522	-0.713048	1.44598	12.1663	0.000486614	0.0487263	ENSMUSG00000030357	0.335696	8.17159	15.8007	7.0376e-05	0.007144	ENSMUSG00000037709	-0.949187
												ENSMUSG00000015222	0.144768	10.4196	12.3178	0.000448651	0.0492683							ENSMUSG00000060962	-1.83295	1.23551	24.797	6.36976e-07	6.39225e-05													ENSMUSG00000014846	-0.489658	5.63594	15.7907	7.07481e-05	0.007144	ENSMUSG00000033715	2.76655
												ENSMUSG00000038119	-0.240113	5.33028	12.3118	0.000450104	0.0492683							ENSMUSG00000054871	-1.04294	2.74553	24.7813	6.42175e-07	6.39738e-05													ENSMUSG00000021710	0.311716	4.06699	15.7655	7.16966e-05	0.00718693	ENSMUSG00000065968	-3.64923
																								ENSMUSG00000022799	-0.501798	6.81985	24.7381	6.56727e-07	6.49493e-05													ENSMUSG00000027015	-0.899944	3.61805	15.6402	7.66098e-05	0.00758049	ENSMUSG00000043531	4.96255
																								ENSMUSG00000026107	0.726873	6.57513	24.6853	6.74982e-07	6.62745e-05													ENSMUSG00000037362	-0.519622	3.27795	15.6352	7.6813e-05	0.00758049	ENSMUSG00000036083	1.26286
																								ENSMUSG00000063785	-0.397701	4.41134	24.659	6.84237e-07	6.67033e-05													ENSMUSG00000031465	-0.376293	2.88518	15.6207	7.74007e-05	0.00758049	ENSMUSG00000019989	1.05968
																								ENSMUSG00000024593	-0.729603	1.31219	24.6074	7.02826e-07	6.77185e-05													ENSMUSG00000041476	-0.193706	8.45148	15.6103	7.78307e-05	0.00758049	ENSMUSG00000003309	-1.01377
																								ENSMUSG00000031488	-1.02326	4.05639	24.6026	7.04574e-07	6.77185e-05													ENSMUSG00000049327	0.297008	7.3727	15.5616	7.98612e-05	0.00767836	ENSMUSG00000024556	-0.850508
																								ENSMUSG00000060002	0.2977	8.71352	24.565	7.18464e-07	6.83712e-05													ENSMUSG00000047238	-0.342179	3.27953	15.5455	8.05445e-05	0.00767836	ENSMUSG00000021464	-1.77491
																								ENSMUSG00000063594	-1.29575	1.1166	24.5571	7.21384e-07	6.83712e-05													ENSMUSG00000016262	-0.683888	3.46162	15.5368	8.09166e-05	0.00767836	ENSMUSG00000029304	-1.35878
																								ENSMUSG00000028690	0.467794	5.38697	24.533	7.30461e-07	6.8754e-05													ENSMUSG00000032181	-0.95385	-0.803587	15.5331	8.1072e-05	0.00767836	ENSMUSG00000022261	1.50542
																								ENSMUSG00000028836	-1.02627	0.625873	24.5179	7.36222e-07	6.88217e-05													ENSMUSG00000026278	-0.443621	2.54005	15.5085	8.2135e-05	0.00772575	ENSMUSG00000040525	0.934317
																								ENSMUSG00000019852	-1.07144	1.03998	24.4923	7.46079e-07	6.92686e-05													ENSMUSG00000019927	0.239286	5.26501	15.4846	8.31791e-05	0.0077509	ENSMUSG00000035376	0.885336
																								ENSMUSG00000048482	0.887564	2.64669	24.4079	7.79499e-07	7.11298e-05													ENSMUSG00000020988	0.215192	5.80309	15.4766	8.35312e-05	0.0077509	ENSMUSG00000028834	1.9991
																								ENSMUSG00000033624	0.602475	6.78751	24.403	7.8146e-07	7.11298e-05													ENSMUSG00000005968	-0.600162	2.56816	15.4437	8.50017e-05	0.00783441	ENSMUSG00000022761	0.874342
																								ENSMUSG00000025650	-0.905613	1.24526	24.4023	7.81761e-07	7.11298e-05													ENSMUSG00000046807	-0.991371	1.61219	15.4223	8.59661e-05	0.00787048	ENSMUSG00000038506	1.41103
																								ENSMUSG00000045875	0.809383	5.16254	24.3857	7.88535e-07	7.12711e-05													ENSMUSG00000032332	-0.542017	1.5938	15.3876	8.75601e-05	0.00796333	ENSMUSG00000050014	-5.38353
																								ENSMUSG00000027445	-2.13628	0.924352	24.3637	7.97561e-07	7.16126e-05													ENSMUSG00000031994	-1.2232	3.20327	15.3498	8.93327e-05	0.00807109	ENSMUSG00000024070	1.28344
																								ENSMUSG00000041482	-1.07639	2.21265	24.3232	8.14538e-07	7.18822e-05													ENSMUSG00000036446	-0.45604	7.26189	15.3324	9.01589e-05	0.0080925	ENSMUSG00000074183	-4.76302
																								ENSMUSG00000034009	-1.22355	4.96941	24.3222	8.14948e-07	7.18822e-05													ENSMUSG00000026755	0.25333	6.40551	15.3117	9.1151e-05	0.0081127	ENSMUSG00000034435	-0.945542
																								ENSMUSG00000040703	-1.21929	3.93063	24.3172	8.17055e-07	7.18822e-05													ENSMUSG00000006360	-0.483221	6.29319	15.3031	9.15654e-05	0.0081127	ENSMUSG00000028136	0.890885
																								ENSMUSG00000048038	-1.66375	0.817934	24.3065	8.21631e-07	7.18822e-05													ENSMUSG00000030862	1.01574	4.78746	15.2607	9.36464e-05	0.00820383	ENSMUSG00000060459	-0.893763
																								ENSMUSG00000003464	0.341803	6.86568	24.2665	8.38836e-07	7.28427e-05													ENSMUSG00000025920	0.3092	6.41172	15.2578	9.37887e-05	0.00820383	ENSMUSG00000038079	1.38299
																								ENSMUSG00000020279	-1.71941	0.310717	24.2564	8.43284e-07	7.28427e-05													ENSMUSG00000038121	0.29103	7.99161	15.1423	9.97022e-05	0.00866589	ENSMUSG00000029695	0.969888
																								ENSMUSG00000030122	-0.432774	6.60937	24.198	8.69208e-07	7.46098e-05													ENSMUSG00000024713	-0.420867	3.00075	15.0783	0.000103143	0.00890854	ENSMUSG00000008226	0.790699
																								ENSMUSG00000020326	0.462831	9.84851	24.1428	8.94497e-07	7.63006e-05													ENSMUSG00000062203	0.153519	6.48616	15.0137	0.000106732	0.00916098	ENSMUSG00000032076	1.41067
																								ENSMUSG00000001247	-1.1294	2.75664	24.1172	9.06461e-07	7.68409e-05													ENSMUSG00000020671	0.176159	7.24205	14.9619	0.000109701	0.00934403	ENSMUSG00000019843	1.41425
																								ENSMUSG00000075271	0.484034	2.52372	24.0968	9.16114e-07	7.71797e-05													ENSMUSG00000054889	0.321426	10.276	14.9529	0.000110226	0.00934403	ENSMUSG00000029772	0.875055
																								ENSMUSG00000030359	-1.52152	0.440378	24.0838	9.22331e-07	7.72268e-05													ENSMUSG00000040112	0.223392	6.08162	14.9288	0.000111647	0.00940645	ENSMUSG00000037053	4.02394
																								ENSMUSG00000026343	-1.2676	1.30501	24.0194	9.53716e-07	7.93678e-05													ENSMUSG00000018796	0.252408	9.87422	14.9116	0.000112669	0.00943462	ENSMUSG00000011008	-2.91958
																								ENSMUSG00000009376	-1.23065	2.67462	23.9638	9.81631e-07	8.11958e-05													ENSMUSG00000040998	-0.678032	2.20139	14.8961	0.000113598	0.00945482	ENSMUSG00000016018	1.04121
																								ENSMUSG00000028033	-1.50097	1.18276	23.9431	9.92229e-07	8.1578e-05													ENSMUSG00000006498	-0.245666	5.83967	14.8412	0.000116955	0.00967559	ENSMUSG00000020534	-0.840281
																								ENSMUSG00000073609	0.608627	5.43325	23.8925	1.01869e-06	8.32516e-05													ENSMUSG00000003477	0.802315	4.82436	14.808	0.000119028	0.00978806	ENSMUSG00000078963	-1.45824
																								ENSMUSG00000026027	0.448251	5.76514	23.8647	1.03352e-06	8.39609e-05													ENSMUSG00000033207	-0.511695	2.4096	14.7703	0.000121434	0.00992649	ENSMUSG00000015599	2.0518
																								ENSMUSG00000031725	-2.78522	1.04099	23.847	1.04305e-06	8.42338e-05													ENSMUSG00000062031	-0.433813	4.00899	14.7206	0.000124677	0.010087	ENSMUSG00000021054	0.998513
																								ENSMUSG00000031906	-1.08017	3.95202	23.7969	1.07052e-06	8.59439e-05													ENSMUSG00000038312	-0.234602	3.76892	14.7151	0.000125038	0.010087	ENSMUSG00000034771	-1.79947
																								ENSMUSG00000040653	0.453377	7.97314	23.7369	1.10445e-06	8.81497e-05													ENSMUSG00000045934	-0.395328	2.85004	14.7067	0.000125601	0.010087	ENSMUSG00000010025	1.01179
																								ENSMUSG00000033436	-0.534804	3.99157	23.6036	1.18363e-06	9.39199e-05													ENSMUSG00000029838	-0.693096	2.50979	14.6694	0.00012811	0.01022	ENSMUSG00000039431	3.00749
																								ENSMUSG00000037681	-1.51851	1.76214	23.5786	1.19915e-06	9.46011e-05													ENSMUSG00000038663	0.314788	9.11981	14.6601	0.000128745	0.01022	ENSMUSG00000028434	-1.10387
																								ENSMUSG00000041592	-1.0236	1.81904	23.5324	1.22827e-06	9.63414e-05													ENSMUSG00000029221	0.203953	7.30933	14.6401	0.000130118	0.0102696	ENSMUSG00000037010	-1.85687
																								ENSMUSG00000020826	0.827472	2.88573	23.4469	1.28409e-06	0.000100145													ENSMUSG00000027833	-0.756684	0.787847	14.624	0.000131234	0.0102985	ENSMUSG00000031995	-1.02831
																								ENSMUSG00000020590	0.344713	6.45443	23.4293	1.2959e-06	0.000100425													ENSMUSG00000027022	0.498351	9.26716	14.5773	0.000134525	0.0104967	ENSMUSG00000074639	-1.82686
																								ENSMUSG00000039470	-0.655372	3.11534	23.4197	1.3024e-06	0.000100425													ENSMUSG00000019768	-0.704952	1.4359	14.5597	0.000135789	0.0105356	ENSMUSG00000017453	0.855254
																								ENSMUSG00000012705	-2.3091	2.514	23.3977	1.31739e-06	0.00010101													ENSMUSG00000009090	0.239914	6.44108	14.5465	0.000136744	0.01055	ENSMUSG00000000420	1.12854
																								ENSMUSG00000020988	0.37134	5.85093	23.3865	1.32504e-06	0.000101029													ENSMUSG00000024120	0.343524	7.25815	14.5144	0.000139094	0.0105537	ENSMUSG00000026482	0.866323
																								ENSMUSG00000035967	-0.409694	4.67178	23.2599	1.41518e-06	0.000107023													ENSMUSG00000027184	0.196396	7.43827	14.5123	0.000139249	0.0105537	ENSMUSG00000048612	-1.08041
																								ENSMUSG00000047686	-1.18509	1.68811	23.2543	1.41935e-06	0.000107023													ENSMUSG00000044308	0.296314	7.977	14.5101	0.000139413	0.0105537	ENSMUSG00000036356	2.28201
																								ENSMUSG00000026600	-0.67404	4.00089	23.1805	1.47489e-06	0.000110561													ENSMUSG00000044221	0.218339	7.74233	14.5017	0.000140034	0.0105537	ENSMUSG00000008540	-1.37009
																								ENSMUSG00000042757	-1.02792	3.72356	23.1706	1.48246e-06	0.000110561													ENSMUSG00000036585	0.295031	7.7473	14.4842	0.000141342	0.0105537	ENSMUSG00000021613	3.79339
																								ENSMUSG00000032370	0.483239	4.33208	23.1473	1.50056e-06	0.00011123													ENSMUSG00000036019	-0.317562	3.74338	14.4781	0.000141796	0.0105537	ENSMUSG00000001056	1.27691
																								ENSMUSG00000038195	0.475441	5.1385	23.1381	1.50773e-06	0.00011123													ENSMUSG00000041688	0.319409	3.86742	14.4648	0.0001428	0.0105537	ENSMUSG00000001786	0.775084
																								ENSMUSG00000030058	-0.294038	6.58823	23.0585	1.5715e-06	0.000115311													ENSMUSG00000029575	0.278606	5.35819	14.463	0.00014294	0.0105537	ENSMUSG00000028980	0.890351
																								ENSMUSG00000024665	-0.599118	4.61821	23.0037	1.61688e-06	0.000118006													ENSMUSG00000036879	0.300263	6.25152	14.3891	0.000148658	0.0108962	ENSMUSG00000037989	1.86383
																								ENSMUSG00000067653	0.894132	4.39476	22.9628	1.6517e-06	0.000119906													ENSMUSG00000037110	0.276822	6.90816	14.3721	0.000150006	0.0108962	ENSMUSG00000054843	1.38999
																								ENSMUSG00000031446	0.292998	7.00434	22.9099	1.69775e-06	0.000122538													ENSMUSG00000002265	-0.664982	5.42116	14.3663	0.000150468	0.0108962	ENSMUSG00000074207	2.49759
																								ENSMUSG00000028672	0.280782	6.19222	22.9007	1.70591e-06	0.000122538													ENSMUSG00000056174	-0.638611	0.798803	14.3628	0.000150752	0.0108962	ENSMUSG00000040152	-1.04968
																								ENSMUSG00000037185	-0.785722	2.26536	22.789	1.80798e-06	0.00012919													ENSMUSG00000021579	0.298804	6.74814	14.3034	0.000155588	0.0111581	ENSMUSG00000023088	-0.995918
																								ENSMUSG00000024299	-0.467868	5.73052	22.7753	1.82093e-06	0.000129437													ENSMUSG00000062906	-0.252996	3.79918	14.2955	0.00015624	0.0111581	ENSMUSG00000031994	-2.86567
																								ENSMUSG00000031883	1.00154	0.046038	22.7457	1.84913e-06	0.000130762													ENSMUSG00000049382	-0.831306	1.3564	14.2868	0.00015696	0.0111581	ENSMUSG00000074435	3.55122
																								ENSMUSG00000048612	-0.722979	4.75463	22.734	1.86045e-06	0.000130884													ENSMUSG00000029163	-0.464707	5.40384	14.2641	0.000158868	0.0111581	ENSMUSG00000017929	1.3227
																								ENSMUSG00000021252	-0.435684	2.72431	22.7236	1.87056e-06	0.00013092													ENSMUSG00000026003	0.241644	9.99076	14.2629	0.000158967	0.0111581	ENSMUSG00000024164	-2.81567
																								ENSMUSG00000000738	0.468333	6.70615	22.7019	1.89184e-06	0.000131372													ENSMUSG00000032047	0.333281	8.82292	14.2595	0.000159251	0.0111581	ENSMUSG00000033096	-1.03354
																								ENSMUSG00000034612	-0.575836	3.03954	22.6974	1.89626e-06	0.000131372													ENSMUSG00000025013	0.779582	0.208944	14.2304	0.000161738	0.0112749	ENSMUSG00000022451	0.693936
																								ENSMUSG00000005813	0.318592	5.49429	22.6859	1.90767e-06	0.000131494													ENSMUSG00000004473	-0.700978	1.72808	14.1606	0.000167848	0.0116341	ENSMUSG00000022583	-6.66982
																								ENSMUSG00000039145	-1.19616	4.67669	22.6384	1.95538e-06	0.000133654													ENSMUSG00000022965	0.235858	7.13016	14.1524	0.000168585	0.0116341	ENSMUSG00000027782	0.811862
																								ENSMUSG00000032513	0.356579	5.20892	22.6352	1.95858e-06	0.000133654													ENSMUSG00000028156	0.334182	7.1771	14.0773	0.000175448	0.011994	ENSMUSG00000030654	0.931304
																								ENSMUSG00000039488	1.25622	0.619191	22.6148	1.97954e-06	0.000134412													ENSMUSG00000021794	0.156485	7.39629	14.0762	0.000175547	0.011994	ENSMUSG00000023243	1.86924
																								ENSMUSG00000029778	-0.767301	4.21222	22.5902	2.00506e-06	0.000135471													ENSMUSG00000049038	0.359359	4.27755	14.0522	0.000177809	0.0119952	ENSMUSG00000007656	0.929803
																								ENSMUSG00000025185	-0.85653	0.845567	22.5643	2.03222e-06	0.000136629													ENSMUSG00000066878	0.877795	-0.925159	14.0491	0.0001781	0.0119952	ENSMUSG00000024064	0.929191
																								ENSMUSG00000039873	0.445731	4.01752	22.5277	2.07137e-06	0.000138579													ENSMUSG00000042298	0.261365	5.67814	14.0477	0.000178232	0.0119952	ENSMUSG00000019913	-1.03355
																								ENSMUSG00000001100	0.374946	6.7615	22.5164	2.08356e-06	0.000138715													ENSMUSG00000039126	0.757253	7.33212	14.0373	0.000179222	0.0119952	ENSMUSG00000060227	1.04358
																								ENSMUSG00000001128	-0.824047	4.46893	22.4321	2.17699e-06	0.000143941													ENSMUSG00000027445	-1.22603	0.577607	14.0287	0.000180037	0.0119952	ENSMUSG00000034258	-1.54374
																								ENSMUSG00000018819	-0.728377	6.10788	22.4267	2.18316e-06	0.000143941													ENSMUSG00000008153	-1.64278	0.256596	14.0207	0.000180805	0.0119952	ENSMUSG00000061825	2.12308
																								ENSMUSG00000024164	-1.01223	9.47651	22.3968	2.21741e-06	0.000145496													ENSMUSG00000027513	-1.70775	3.38377	13.9667	0.000186072	0.0122853	ENSMUSG00000003948	-1.00957
																								ENSMUSG00000024181	0.366383	6.39237	22.307	2.32357e-06	0.000151732													ENSMUSG00000024143	0.252155	7.44434	13.889	0.000193927	0.0126848	ENSMUSG00000022877	4.72734
																								ENSMUSG00000023367	-0.804021	4.27514	22.2953	2.33772e-06	0.00015193													ENSMUSG00000028127	0.226584	7.16086	13.8886	0.000193971	0.0126848	ENSMUSG00000032060	-1.2669
																								ENSMUSG00000045180	-0.481739	3.37116	22.2577	2.38404e-06	0.000154206													ENSMUSG00000025006	0.385739	8.67569	13.8709	0.000195812	0.0127213	ENSMUSG00000032348	-2.66214
																								ENSMUSG00000020475	0.499366	8.7644	22.2474	2.39684e-06	0.000154302													ENSMUSG00000001506	-0.508206	6.95301	13.8654	0.000196382	0.0127213	ENSMUSG00000022829	2.11107
																								ENSMUSG00000020949	0.392213	7.22213	22.1755	2.48835e-06	0.000159441													ENSMUSG00000034066	0.356062	4.22127	13.8239	0.000200763	0.0129217	ENSMUSG00000027363	0.81533
																								ENSMUSG00000032327	-1.27028	0.323902	22.1362	2.53969e-06	0.000161971													ENSMUSG00000026834	-1.28386	0.0723328	13.8184	0.000201357	0.0129217	ENSMUSG00000037348	1.45393
																								ENSMUSG00000020785	-0.774424	2.15764	22.1115	2.57261e-06	0.000163307													ENSMUSG00000032271	-0.469956	1.89088	13.8066	0.000202622	0.0129424	ENSMUSG00000041571	-1.14303
																								ENSMUSG00000045896	0.289211	5.88281	22.1002	2.58782e-06	0.000163512													ENSMUSG00000030218	-0.655221	7.63139	13.7976	0.000203596	0.0129443	ENSMUSG00000022948	-2.31129
																								ENSMUSG00000031278	-0.382324	4.88101	22.078	2.61794e-06	0.000164653													ENSMUSG00000027288	0.324637	10.1602	13.7882	0.000204612	0.012949	ENSMUSG00000024981	-0.764566
																								ENSMUSG00000006369	-0.85161	7.77081	21.9387	2.81495e-06	0.000176231													ENSMUSG00000030272	0.18878	6.02677	13.7672	0.000206918	0.0130349	ENSMUSG00000031647	1.02882
																								ENSMUSG00000035930	-1.17634	2.88956	21.8929	2.88295e-06	0.000179664													ENSMUSG00000001349	-0.696392	2.10563	13.755	0.00020827	0.0130601	ENSMUSG00000022809	-1.8748
																								ENSMUSG00000049287	0.448758	4.64751	21.8558	2.93923e-06	0.000182339													ENSMUSG00000043068	0.503453	0.776567	13.721	0.000212071	0.0132381	ENSMUSG00000028577	0.695941
																								ENSMUSG00000029650	0.683965	2.70555	21.7989	3.02781e-06	0.000186984													ENSMUSG00000033499	0.19707	6.64834	13.7027	0.000214145	0.0133071	ENSMUSG00000019734	-0.910141
																								ENSMUSG00000022231	-0.587012	3.92833	21.7894	3.0428e-06	0.000187064													ENSMUSG00000035372	-0.267663	3.32249	13.6866	0.000215995	0.0133569	ENSMUSG00000000708	0.754523
																								ENSMUSG00000019817	-1.03398	5.0518	21.7021	3.18438e-06	0.00019489													ENSMUSG00000006221	0.298383	10.8961	13.6788	0.000216892	0.0133569	ENSMUSG00000110277	1.39207
																								ENSMUSG00000059741	0.626069	11.7293	21.6629	3.2501e-06	0.000198024													ENSMUSG00000061455	0.21287	5.35939	13.6557	0.000219575	0.0134141	ENSMUSG00000048232	0.899341
																								ENSMUSG00000020027	-0.453233	5.58289	21.6489	3.27406e-06	0.000198597													ENSMUSG00000024593	-0.48664	1.1049	13.654	0.000219775	0.0134141	ENSMUSG00000051147	1.59115
																								ENSMUSG00000026773	-0.712771	4.12392	21.6076	3.34516e-06	0.000202012													ENSMUSG00000049106	0.191923	5.87865	13.6141	0.000224497	0.0136012	ENSMUSG00000032434	1.08362
																								ENSMUSG00000027559	-2.31748	6.28275	21.5839	3.38687e-06	0.00020363													ENSMUSG00000067242	0.920548	1.91027	13.6046	0.000225634	0.0136012	ENSMUSG00000025199	0.849215
																								ENSMUSG00000022463	-0.397827	5.73722	21.5338	3.4765e-06	0.000207292													ENSMUSG00000050288	-0.844605	2.19263	13.5983	0.000226385	0.0136012	ENSMUSG00000040859	0.837166
																								ENSMUSG00000032010	0.555064	5.99211	21.5329	3.47816e-06	0.000207292													ENSMUSG00000074971	-0.561961	3.24881	13.5949	0.000226801	0.0136012	ENSMUSG00000032548	-1.16243
																								ENSMUSG00000025479	-1.61028	3.30853	21.5106	3.51877e-06	0.000208801													ENSMUSG00000048497	-0.420574	2.43581	13.5722	0.000229562	0.0137068	ENSMUSG00000022237	0.998995
																								ENSMUSG00000005882	0.415363	7.09707	21.5013	3.5359e-06	0.000208878													ENSMUSG00000000168	0.239355	8.47799	13.5356	0.000234086	0.0139165	ENSMUSG00000028991	0.884794
																								ENSMUSG00000068011	0.777287	0.482668	21.4933	3.55068e-06	0.000208878													ENSMUSG00000024507	0.263001	6.73526	13.5055	0.000237864	0.0140801	ENSMUSG00000030826	-0.896886
																								ENSMUSG00000024501	-0.482537	6.0803	21.4259	3.67762e-06	0.000215417													ENSMUSG00000037151	0.365776	5.67961	13.4095	0.000250347	0.0147554	ENSMUSG00000074796	-1.36528
																								ENSMUSG00000066878	1.56624	-0.692267	21.4101	3.70811e-06	0.000216274													ENSMUSG00000024687	0.256361	7.33597	13.3934	0.000252508	0.0148001	ENSMUSG00000024697	1.43881
																								ENSMUSG00000046056	-0.863553	2.20431	21.3808	3.76531e-06	0.000218677													ENSMUSG00000001918	-0.503332	4.39073	13.3878	0.00025326	0.0148001	ENSMUSG00000068086	4.82776
																								ENSMUSG00000020189	0.339444	6.9524	21.3716	3.78343e-06	0.000218798													ENSMUSG00000001119	-0.29817	6.93301	13.3691	0.000255803	0.0148518	ENSMUSG00000037855	2.9727
																								ENSMUSG00000028307	1.73722	2.27874	21.3565	3.81335e-06	0.000219598													ENSMUSG00000056494	1.1423	0.535712	13.3599	0.000257062	0.0148518	ENSMUSG00000028836	1.91091
																								ENSMUSG00000049550	0.498371	7.71264	21.3478	3.83064e-06	0.000219666													ENSMUSG00000020654	-0.345088	2.88731	13.3575	0.000257389	0.0148518	ENSMUSG00000037032	-1.09308
																								ENSMUSG00000006310	-1.6207	-0.419443	21.3366	3.85314e-06	0.000220032													ENSMUSG00000032370	0.287653	4.22595	13.3072	0.000264384	0.0151866	ENSMUSG00000005968	1.36048
																								ENSMUSG00000034573	-0.74814	4.33773	21.3235	3.8795e-06	0.000220614													ENSMUSG00000064215	-0.504449	4.80858	13.3	0.000265403	0.0151866	ENSMUSG00000021932	1.03203
																								ENSMUSG00000040690	-0.512053	4.77683	21.2835	3.96135e-06	0.000224334													ENSMUSG00000041058	0.223391	6.60504	13.291	0.000266684	0.0151966	ENSMUSG00000032507	2.15679
																								ENSMUSG00000026193	-0.917002	7.93525	21.2597	4.01072e-06	0.000226191													ENSMUSG00000026938	-0.780619	2.65982	13.2819	0.000267976	0.0152071	ENSMUSG00000042460	1.01254
																								ENSMUSG00000049047	-0.430411	4.35806	21.218	4.09904e-06	0.000230064													ENSMUSG00000025745	0.287448	10.4174	13.2434	0.000273541	0.015459	ENSMUSG00000020777	1.26787
																								ENSMUSG00000041548	0.521984	8.84559	21.2114	4.1131e-06	0.000230064													ENSMUSG00000030852	0.322888	8.3323	13.1892	0.000281571	0.0157472	ENSMUSG00000042712	-0.700022
																								ENSMUSG00000020544	0.430053	4.20698	21.202	4.13337e-06	0.000230254													ENSMUSG00000037681	-1.04995	1.21767	13.1875	0.000281819	0.0157472	ENSMUSG00000028553	-3.33799
																								ENSMUSG00000024454	0.263997	5.60857	21.1712	4.20028e-06	0.00023175													ENSMUSG00000073987	-0.276093	3.75004	13.1858	0.000282081	0.0157472	ENSMUSG00000070985	-2.13888
																								ENSMUSG00000020459	0.367066	5.59082	21.1667	4.21014e-06	0.00023175													ENSMUSG00000024798	0.571801	0.471667	13.1713	0.000284272	0.0158053	ENSMUSG00000027601	0.763916
																								ENSMUSG00000022110	0.439479	9.09112	21.16	4.225e-06	0.00023175													ENSMUSG00000027774	0.24749	7.47756	13.1035	0.000294747	0.0163216	ENSMUSG00000070576	2.11414
																								ENSMUSG00000062031	-0.715093	3.90272	21.1585	4.22815e-06	0.00023175													ENSMUSG00000028836	-0.787199	0.295337	13.0746	0.000299329	0.0165088	ENSMUSG00000058258	1.90989
																								ENSMUSG00000054675	-0.921975	3.97468	21.1448	4.25848e-06	0.000232411													ENSMUSG00000066113	-0.80826	2.21141	13.049	0.000303448	0.016669	ENSMUSG00000027035	0.805432
																								ENSMUSG00000037624	0.691857	2.04788	21.1308	4.28976e-06	0.000232411													ENSMUSG00000031877	-0.529444	2.88875	13.0379	0.000305244	0.0167007	ENSMUSG00000074028	-1.37594
																								ENSMUSG00000026834	-2.32946	0.525073	21.1301	4.29129e-06	0.000232411													ENSMUSG00000016664	0.262045	8.21092	13.0305	0.000306457	0.0167007	ENSMUSG00000068877	1.43186
																								ENSMUSG00000030545	0.309403	4.24814	21.0965	4.36723e-06	0.000235589													ENSMUSG00000024816	-0.301346	3.8843	13.0102	0.000309795	0.0168159	ENSMUSG00000031833	1.19806
																								ENSMUSG00000022040	0.527777	8.02736	21.0685	4.43164e-06	0.000238122													ENSMUSG00000020524	1.11176	-0.298053	12.9949	0.000312345	0.0168875	ENSMUSG00000020309	0.817628
																								ENSMUSG00000046532	-0.616308	4.30314	21.0512	4.47172e-06	0.000239334													ENSMUSG00000069920	-0.396022	3.03898	12.9769	0.000315351	0.0169832	ENSMUSG00000019189	0.820272
																								ENSMUSG00000009090	0.354657	6.44861	21.031	4.5191e-06	0.000240924													ENSMUSG00000058975	0.691774	0.171927	12.9229	0.000324582	0.017412	ENSMUSG00000015305	0.940144
																								ENSMUSG00000024507	0.35829	6.67894	21.0137	4.56008e-06	0.000242163													ENSMUSG00000051022	-0.460705	2.94795	12.9006	0.000328478	0.0175525	ENSMUSG00000074892	1.65741
																								ENSMUSG00000029765	-0.651255	6.33584	20.9983	4.59695e-06	0.000243175													ENSMUSG00000058690	0.305309	7.72849	12.8711	0.000333689	0.0177618	ENSMUSG00000039457	-0.97862
																								ENSMUSG00000038725	-0.968777	6.23015	20.9494	4.71564e-06	0.000248251													ENSMUSG00000027499	0.30817	8.02228	12.8433	0.000338684	0.0178744	ENSMUSG00000024575	3.35333
																								ENSMUSG00000055653	-1.03866	5.3187	20.9439	4.72929e-06	0.000248251													ENSMUSG00000012428	0.259762	5.42787	12.8399	0.000339309	0.0178744	ENSMUSG00000021645	0.797708
																								ENSMUSG00000028443	0.347992	3.99591	20.9142	4.80315e-06	0.000251163													ENSMUSG00000025289	-0.225373	4.39564	12.8377	0.000339708	0.0178744	ENSMUSG00000055312	1.23339
																								ENSMUSG00000059921	-1.28867	0.881997	20.8183	5.0497e-06	0.000262424													ENSMUSG00000026888	0.299286	7.18837	12.8113	0.000344535	0.0180361	ENSMUSG00000019872	0.789141
																								ENSMUSG00000023277	0.473334	6.89813	20.8156	5.05697e-06	0.000262424													ENSMUSG00000030772	-0.877107	7.32833	12.8036	0.000345949	0.0180361	ENSMUSG00000005225	1.0278
																								ENSMUSG00000056025	-1.2621	2.36407	20.8066	5.08078e-06	0.00026255													ENSMUSG00000022261	-0.293822	5.94041	12.7994	0.000346722	0.0180361	ENSMUSG00000052117	-1.55928
																								ENSMUSG00000073530	-1.44431	0.478066	20.8002	5.09788e-06	0.00026255													ENSMUSG00000028577	0.233137	6.01657	12.7708	0.000352071	0.0181778	ENSMUSG00000090486	1.28324
																								ENSMUSG00000005804	0.278919	5.06633	20.7905	5.12372e-06	0.000262889													ENSMUSG00000023328	-0.480693	2.34691	12.7646	0.00035325	0.0181778	ENSMUSG00000040471	-0.975407
																								ENSMUSG00000032092	-1.20655	2.06129	20.7739	5.16839e-06	0.000264082													ENSMUSG00000032549	-0.933734	2.09608	12.7637	0.000353416	0.0181778	ENSMUSG00000035769	0.839487
																								ENSMUSG00000037263	-1.41894	1.51959	20.7675	5.18567e-06	0.000264082													ENSMUSG00000020590	0.237443	6.53691	12.7469	0.000356606	0.0182734	ENSMUSG00000032068	-0.963702
																								ENSMUSG00000016179	-0.971702	1.56465	20.7497	5.23396e-06	0.000264295													ENSMUSG00000027010	0.227796	7.69581	12.7356	0.000358756	0.0183152	ENSMUSG00000001155	2.20602
																								ENSMUSG00000022210	0.396453	6.3365	20.7419	5.25541e-06	0.000264295													ENSMUSG00000022594	0.312464	8.0752	12.7182	0.000362113	0.0184182	ENSMUSG00000031609	1.5796
																								ENSMUSG00000030787	-0.798228	4.73344	20.7333	5.27889e-06	0.000264295													ENSMUSG00000035783	-0.415359	5.94407	12.7027	0.000365137	0.0185027	ENSMUSG00000030104	0.836346
																								ENSMUSG00000029174	-0.912599	5.50271	20.7308	5.28585e-06	0.000264295													ENSMUSG00000025161	-0.52007	1.44736	12.6958	0.00036647	0.0185027	ENSMUSG00000021620	1.37142
																								ENSMUSG00000032548	-0.898464	4.33448	20.7249	5.30212e-06	0.000264295													ENSMUSG00000027889	-0.424143	3.52013	12.6854	0.000368525	0.0185383	ENSMUSG00000000308	-0.937283
																								ENSMUSG00000071342	0.493657	5.4759	20.7235	5.30603e-06	0.000264295													ENSMUSG00000075592	-0.372419	4.054	12.6736	0.000370864	0.0185485	ENSMUSG00000026123	0.705065
																								ENSMUSG00000025491	-0.719008	2.53554	20.6986	5.37565e-06	0.000266789													ENSMUSG00000032714	-0.21026	4.64816	12.6663	0.000372308	0.0185485	ENSMUSG00000045515	-0.859616
																								ENSMUSG00000056737	-0.618029	3.89598	20.6519	5.50831e-06	0.000272382													ENSMUSG00000026623	0.292167	7.34809	12.6639	0.000372781	0.0185485	ENSMUSG00000046562	0.707096
																								ENSMUSG00000058571	-0.554964	3.76853	20.6275	5.57877e-06	0.00027487													ENSMUSG00000021900	-0.300213	3.67485	12.6271	0.000380196	0.0188492	ENSMUSG00000072575	4.21443
																								ENSMUSG00000070469	-0.637715	3.49437	20.5856	5.7023e-06	0.000277546													ENSMUSG00000031963	0.490335	2.85686	12.5992	0.00038592	0.018995	ENSMUSG00000022286	-0.88296
																								ENSMUSG00000050335	-1.09977	3.5548	20.5786	5.72313e-06	0.000277546													ENSMUSG00000067365	-0.193255	3.74404	12.593	0.000387193	0.018995	ENSMUSG00000055850	0.692523
																								ENSMUSG00000058704	0.365411	5.51415	20.5758	5.73153e-06	0.000277546													ENSMUSG00000031284	-0.835424	-0.354666	12.5926	0.000387286	0.018995	ENSMUSG00000016200	1.48748
																								ENSMUSG00000024083	0.265186	7.65845	20.5748	5.73451e-06	0.000277546													ENSMUSG00000029804	0.291303	5.94314	12.5748	0.000390973	0.0191076	ENSMUSG00000030207	-0.767378
																								ENSMUSG00000028452	0.302337	8.01355	20.5747	5.73475e-06	0.000277546													ENSMUSG00000022337	0.203975	6.88028	12.5286	0.00040078	0.0195174	ENSMUSG00000049670	-1.15223
																								ENSMUSG00000003534	-0.349254	5.63113	20.5365	5.85038e-06	0.000282141													ENSMUSG00000029675	-0.501367	6.14031	12.5149	0.000403711	0.0195773	ENSMUSG00000030494	-1.0205
																								ENSMUSG00000029575	0.438877	5.37661	20.5025	5.95525e-06	0.000286188													ENSMUSG00000031974	0.245886	6.0568	12.5096	0.000404861	0.0195773	ENSMUSG00000029014	0.736477
																								ENSMUSG00000029059	0.596607	5.5232	20.4715	6.05261e-06	0.000289335													ENSMUSG00000027446	-0.768956	-0.38214	12.4932	0.000408435	0.0196808	ENSMUSG00000012187	1.78929
																								ENSMUSG00000056481	-0.500365	4.05744	20.4643	6.07528e-06	0.000289335													ENSMUSG00000030986	0.32458	5.43371	12.4481	0.000418412	0.0200911	ENSMUSG00000062410	2.51559
																								ENSMUSG00000063354	-1.1171	1.23091	20.4615	6.08435e-06	0.000289335													ENSMUSG00000041977	0.160805	5.59493	12.4406	0.000420093	0.0201015	ENSMUSG00000021594	1.25775
																								ENSMUSG00000027996	-1.03231	2.99926	20.4438	6.14088e-06	0.00028982													ENSMUSG00000020186	-0.551535	5.20599	12.4126	0.000426456	0.0203196	ENSMUSG00000022805	-3.53158
																								ENSMUSG00000044308	0.469729	7.92503	20.4432	6.14282e-06	0.00028982													ENSMUSG00000019278	0.419458	6.25568	12.4075	0.00042761	0.0203196	ENSMUSG00000025921	1.00004
																								ENSMUSG00000059447	0.481131	10.5623	20.4384	6.15826e-06	0.00028982													ENSMUSG00000021403	-0.64245	0.0746252	12.3847	0.000432863	0.0204983	ENSMUSG00000034785	-2.62908
																								ENSMUSG00000037405	-0.663778	4.67084	20.4143	6.23605e-06	0.000292473													ENSMUSG00000038582	0.280845	7.75223	12.3597	0.000438705	0.020659	ENSMUSG00000018387	1.85991
																								ENSMUSG00000036545	-0.526852	5.20877	20.3938	6.30338e-06	0.000294618													ENSMUSG00000064356	0.396963	2.1817	12.3573	0.000439265	0.020659	ENSMUSG00000027004	1.06686
																								ENSMUSG00000036098	-0.963008	4.85677	20.38	6.34888e-06	0.000295732													ENSMUSG00000025544	0.158205	7.40349	12.3165	0.000448965	0.0210296	ENSMUSG00000020064	0.916709
																								ENSMUSG00000061455	0.331619	5.36114	20.3502	6.44861e-06	0.000299356													ENSMUSG00000053175	-0.45067	2.46192	12.3114	0.000450208	0.0210296	ENSMUSG00000013997	0.600889
																								ENSMUSG00000051890	0.380444	5.50773	20.3426	6.4743e-06	0.00029953													ENSMUSG00000026072	-0.254719	4.34345	12.2918	0.000454946	0.0211333	ENSMUSG00000020840	0.948064
																								ENSMUSG00000018339	-0.767724	9.26573	20.3217	6.54538e-06	0.000301795													ENSMUSG00000031446	0.189135	7.07644	12.2895	0.000455506	0.0211333	ENSMUSG00000042510	-0.959005
																								ENSMUSG00000030245	-0.307606	4.7163	20.2872	6.66461e-06	0.000306258													ENSMUSG00000042605	0.225448	6.2466	12.2229	0.000472061	0.0217885	ENSMUSG00000022698	0.651976
																								ENSMUSG00000051550	-0.992088	5.13981	20.2539	6.78153e-06	0.000310585													ENSMUSG00000024782	0.273333	6.88127	12.2156	0.000473919	0.0217885	ENSMUSG00000054052	-3.81051
																								ENSMUSG00000037697	-0.365901	4.44075	20.2358	6.84599e-06	0.000312489													ENSMUSG00000027333	-0.2988	4.6641	12.2098	0.000475386	0.0217885	ENSMUSG00000031255	-1.13398
																								ENSMUSG00000027239	-1.00006	1.73914	20.2282	6.87337e-06	0.000312692													ENSMUSG00000090841	-0.225123	7.9047	12.2012	0.000477591	0.0217885	ENSMUSG00000011179	2.51693
																								ENSMUSG00000031958	0.508006	5.15131	20.2016	6.96958e-06	0.000315097													ENSMUSG00000025917	0.171713	6.03083	12.1968	0.000478718	0.0217885	ENSMUSG00000036880	-1.23621
																								ENSMUSG00000031375	-0.500676	8.58595	20.2008	6.97239e-06	0.000315097													ENSMUSG00000057469	0.173716	6.73839	12.1936	0.000479544	0.0217885	ENSMUSG00000061731	0.707462
																								ENSMUSG00000060376	0.517667	7.99771	20.1839	7.03415e-06	0.000316271													ENSMUSG00000027304	0.146459	5.70248	12.189	0.000480733	0.0217885	ENSMUSG00000045730	1.67862
																								ENSMUSG00000060679	0.364309	6.09603	20.1811	7.04471e-06	0.000316271													ENSMUSG00000005469	0.220804	7.786	12.1721	0.000485087	0.0218493	ENSMUSG00000031844	1.95438
																								ENSMUSG00000024940	-0.367245	6.32206	20.1585	7.12839e-06	0.000318001													ENSMUSG00000060675	0.198803	7.09515	12.1715	0.000485257	0.0218493	ENSMUSG00000031201	0.588306
																								ENSMUSG00000023723	0.50792	7.05354	20.1581	7.12985e-06	0.000318001													ENSMUSG00000021614	-0.296587	4.90303	12.1	0.000504223	0.0226291	ENSMUSG00000021175	-1.29873
																								ENSMUSG00000034282	-1.12378	1.98626	20.1211	7.26907e-06	0.000322714													ENSMUSG00000001441	0.167843	6.66131	12.0846	0.000508391	0.0226399	ENSMUSG00000042743	1.67399
																								ENSMUSG00000037855	-0.845676	0.532162	20.1175	7.28281e-06	0.000322714													ENSMUSG00000021838	0.261622	6.61994	12.081	0.000509389	0.0226399	ENSMUSG00000029729	0.726268
																								ENSMUSG00000030753	0.275105	7.01632	20.0995	7.35156e-06	0.000324706													ENSMUSG00000027367	0.186397	7.81079	12.0809	0.000509411	0.0226399	ENSMUSG00000027360	-7.80577
																								ENSMUSG00000020431	-1.17928	4.66568	20.0926	7.37807e-06	0.000324826													ENSMUSG00000004565	-0.217775	4.47213	12.043	0.000519867	0.0230301	ENSMUSG00000010080	-0.932745
																								ENSMUSG00000037625	-1.19049	0.972181	20.0203	7.66257e-06	0.000336266													ENSMUSG00000090942	2.1017	4.60803	12.0264	0.000524535	0.0231622	ENSMUSG00000026832	-0.701344
																								ENSMUSG00000022309	-0.78437	7.06758	19.9441	7.97386e-06	0.000348805													ENSMUSG00000024501	-0.406363	5.77531	11.9903	0.000534769	0.0235384	ENSMUSG00000035780	5.11886
																								ENSMUSG00000040564	-1.80761	1.51806	19.9159	8.09235e-06	0.000352858													ENSMUSG00000020720	0.169935	6.4987	11.9454	0.000547815	0.0240356	ENSMUSG00000051652	1.48377
																								ENSMUSG00000021360	-0.403223	3.94162	19.8589	8.33751e-06	0.000362389													ENSMUSG00000049550	0.327105	7.86277	11.9381	0.000549975	0.0240535	ENSMUSG00000019852	-1.2017
																								ENSMUSG00000024827	-0.987505	0.0506815	19.8433	8.4057e-06	0.000364134													ENSMUSG00000021420	0.245539	5.53036	11.9082	0.000558876	0.0242982	ENSMUSG00000018569	-1.07346
																								ENSMUSG00000000308	-1.42778	2.6398	19.8374	8.43174e-06	0.000364134													ENSMUSG00000029685	0.362461	6.2023	11.9074	0.000559107	0.0242982	ENSMUSG00000053453	0.66352
																								ENSMUSG00000027015	-1.33913	4.03009	19.8315	8.45769e-06	0.000364134													ENSMUSG00000025241	0.282634	9.10222	11.8723	0.000569743	0.0246823	ENSMUSG00000021339	0.830949
																								ENSMUSG00000021973	0.301922	6.64502	19.7985	8.60487e-06	0.000369306													ENSMUSG00000026773	-0.461846	3.81264	11.8224	0.000585213	0.0252403	ENSMUSG00000060807	-7.82776
																								ENSMUSG00000031877	-0.861939	3.11595	19.7837	8.67174e-06	0.000371009													ENSMUSG00000063785	-0.293309	4.53288	11.819	0.000586299	0.0252403	ENSMUSG00000057766	1.83033
																								ENSMUSG00000030256	0.512347	4.38468	19.7346	8.89762e-06	0.000379484													ENSMUSG00000040653	0.249006	7.92728	11.788	0.000596145	0.025584	ENSMUSG00000041831	-2.64172
																								ENSMUSG00000028955	0.272803	6.2102	19.727	8.93298e-06	0.000379805													ENSMUSG00000031913	0.136655	5.9012	11.7511	0.000608058	0.0258874	ENSMUSG00000038879	1.2667
																								ENSMUSG00000021820	0.290918	6.16627	19.7075	9.02485e-06	0.000382519													ENSMUSG00000036040	-0.560627	4.24554	11.7464	0.000609601	0.0258874	ENSMUSG00000039519	5.14133
																								ENSMUSG00000004264	0.338778	7.09627	19.7008	9.05637e-06	0.000382667													ENSMUSG00000021460	0.333677	6.26094	11.7431	0.000610697	0.0258874	ENSMUSG00000024736	-0.807974
																								ENSMUSG00000039519	-0.845183	0.180089	19.6926	9.09534e-06	0.000383127													ENSMUSG00000002997	-1.06714	3.38501	11.7429	0.000610758	0.0258874	ENSMUSG00000024479	-0.816698
																								ENSMUSG00000075296	-1.29878	-0.177212	19.6812	9.1497e-06	0.000383224													ENSMUSG00000021898	0.278299	6.52401	11.7303	0.000614908	0.0259009	ENSMUSG00000024766	3.0152
																								ENSMUSG00000024597	0.312912	5.17188	19.6803	9.1538e-06	0.000383224													ENSMUSG00000059851	-0.246477	3.97301	11.7197	0.000618433	0.0259009	ENSMUSG00000027429	0.789615
																								ENSMUSG00000005124	-1.21124	2.29991	19.6321	9.38768e-06	0.000391813													ENSMUSG00000020592	-0.425047	3.28729	11.7154	0.000619857	0.0259009	ENSMUSG00000026594	0.868171
																								ENSMUSG00000075270	1.77451	1.69769	19.6053	9.5204e-06	0.000395834													ENSMUSG00000006369	-0.710549	7.29386	11.7137	0.000620404	0.0259009	ENSMUSG00000025534	3.08232
																								ENSMUSG00000039116	-0.954532	3.83204	19.601	9.54201e-06	0.000395834													ENSMUSG00000044550	-0.922138	-0.584081	11.7061	0.000622961	0.0259009	ENSMUSG00000040658	1.69344
																								ENSMUSG00000007989	-0.69001	2.67862	19.594	9.57714e-06	0.000396087													ENSMUSG00000044066	0.216418	6.30688	11.7043	0.000623542	0.0259009	ENSMUSG00000030004	1.83467
																								ENSMUSG00000026380	-1.00253	1.80699	19.5792	9.65166e-06	0.000397963													ENSMUSG00000030058	-0.207385	6.463	11.7022	0.000624278	0.0259009	ENSMUSG00000092212	-1.6329
																								ENSMUSG00000042035	-0.501169	4.85021	19.57	9.69818e-06	0.000398677													ENSMUSG00000048038	-1.28518	0.102414	11.6815	0.000631257	0.0260377	ENSMUSG00000045374	1.12512
																								ENSMUSG00000057967	-0.570748	2.01431	19.5402	9.85025e-06	0.000403712													ENSMUSG00000003352	-0.534302	2.57301	11.6811	0.000631367	0.0260377	ENSMUSG00000069670	5.9974
																								ENSMUSG00000041540	-0.818773	2.40998	19.5037	1.00405e-05	0.000410278													ENSMUSG00000022620	-0.257698	5.10108	11.6655	0.000636707	0.0260415	ENSMUSG00000006931	-0.962507
																								ENSMUSG00000057176	0.645799	2.72714	19.4931	1.00961e-05	0.000411319													ENSMUSG00000102428	-0.464359	1.01074	11.6635	0.00063737	0.0260415	ENSMUSG00000026415	2.87257
																								ENSMUSG00000029221	0.315704	7.38083	19.4757	1.01885e-05	0.000412888													ENSMUSG00000052337	0.227426	9.079	11.6592	0.000638869	0.0260415	ENSMUSG00000048058	0.693137
																								ENSMUSG00000020444	0.31233	5.60074	19.4745	1.01951e-05	0.000412888													ENSMUSG00000029174	-0.589037	5.12839	11.6587	0.000639044	0.0260415	ENSMUSG00000028989	2.23549
																								ENSMUSG00000030739	0.431183	6.65158	19.4655	1.02432e-05	0.000413606													ENSMUSG00000024454	0.17906	5.49933	11.6415	0.000644958	0.0262047	ENSMUSG00000020902	0.771491
																								ENSMUSG00000039048	0.419733	6.29598	19.4564	1.02921e-05	0.000414357													ENSMUSG00000039768	0.220445	6.06298	11.6346	0.00064737	0.0262252	ENSMUSG00000029994	-0.602139
																								ENSMUSG00000069763	-0.715155	3.87945	19.4438	1.03605e-05	0.000415882													ENSMUSG00000022231	-0.365276	3.71137	11.608	0.000656675	0.0264964	ENSMUSG00000035168	-0.711305
																								ENSMUSG00000041361	0.542895	8.92175	19.4183	1.04994e-05	0.000420221													ENSMUSG00000022799	-0.263469	6.72489	11.6045	0.000657923	0.0264964	ENSMUSG00000063796	-1.25079
																								ENSMUSG00000039901	0.376838	4.59939	19.3868	1.06744e-05	0.000425978													ENSMUSG00000042751	-0.601751	0.133621	11.5955	0.000661131	0.0265477	ENSMUSG00000026839	2.10013
																								ENSMUSG00000016262	-0.916387	3.84051	19.3594	1.08284e-05	0.000430862													ENSMUSG00000040536	-0.820395	-0.287499	11.5835	0.000665388	0.0266407	ENSMUSG00000027801	4.02947
																								ENSMUSG00000002105	-0.33424	5.09847	19.3336	1.09756e-05	0.000435451													ENSMUSG00000008734	-0.321458	5.2799	11.5378	0.000681963	0.027225	ENSMUSG00000078945	1.42471
																								ENSMUSG00000096606	-0.677158	2.80636	19.2859	1.12533e-05	0.000445173													ENSMUSG00000060843	0.345267	5.39936	11.5256	0.000686449	0.0272847	ENSMUSG00000025268	-0.885814
																								ENSMUSG00000068747	-0.5558	7.02316	19.2766	1.13083e-05	0.000446057													ENSMUSG00000027984	0.262382	9.12065	11.52	0.00068851	0.0272847	ENSMUSG00000048078	-1.51853
																								ENSMUSG00000028944	-0.596765	5.73473	19.2485	1.14762e-05	0.000451184													ENSMUSG00000006818	0.310653	9.26628	11.5176	0.000689419	0.0272847	ENSMUSG00000036564	-0.892357
																								ENSMUSG00000056770	0.253657	6.84804	19.2438	1.15044e-05	0.000451184													ENSMUSG00000041361	0.328408	9.05932	11.5121	0.000691438	0.027286	ENSMUSG00000040213	-1.22108
																								ENSMUSG00000032332	-0.770565	1.8482	19.2199	1.16491e-05	0.000455552													ENSMUSG00000030545	0.212715	4.21236	11.4986	0.000696469	0.0273638	ENSMUSG00000090145	2.91924
																								ENSMUSG00000035203	0.37145	7.09017	19.2052	1.17391e-05	0.00045776													ENSMUSG00000029776	0.2621	7.82648	11.4962	0.000697396	0.0273638	ENSMUSG00000024042	-1.64428
																								ENSMUSG00000038240	0.406205	4.68816	19.188	1.18455e-05	0.000460593													ENSMUSG00000047879	0.197822	6.38059	11.475	0.000705381	0.0275983	ENSMUSG00000058690	0.831264
																								ENSMUSG00000011034	1.37364	-0.420344	19.1688	1.19654e-05	0.000462793													ENSMUSG00000046314	-0.358066	4.12235	11.4602	0.000711031	0.0277403	ENSMUSG00000001054	0.832556
																								ENSMUSG00000004473	-0.944005	1.38598	19.1681	1.197e-05	0.000462793													ENSMUSG00000036334	-0.439394	3.54958	11.4472	0.00071603	0.0278546	ENSMUSG00000004319	0.643223
																								ENSMUSG00000041058	0.253323	6.65742	19.1378	1.21612e-05	0.000468858													ENSMUSG00000034796	1.03331	1.7766	11.442	0.000718017	0.0278546	ENSMUSG00000033386	1.25481
																								ENSMUSG00000024048	0.400379	7.14801	19.0975	1.24206e-05	0.00047751													ENSMUSG00000005804	0.189521	5.11609	11.4266	0.000723991	0.0280072	ENSMUSG00000055912	0.605493
																								ENSMUSG00000048279	0.601519	5.73017	19.0759	1.25622e-05	0.000479288													ENSMUSG00000063884	0.299168	6.54078	11.4055	0.000732285	0.0282485	ENSMUSG00000058446	0.905249
																								ENSMUSG00000032105	0.971172	1.81261	19.0743	1.25729e-05	0.000479288													ENSMUSG00000030753	0.215319	6.86756	11.3706	0.000746166	0.0286016	ENSMUSG00000027896	-1.35835
																								ENSMUSG00000030790	-0.923663	3.99609	19.0654	1.26312e-05	0.000479288													ENSMUSG00000024527	0.225876	7.44248	11.3659	0.000748031	0.0286016	ENSMUSG00000024552	-0.992782
																								ENSMUSG00000027187	0.323717	7.66784	19.0651	1.26335e-05	0.000479288													ENSMUSG00000027618	0.17147	6.3314	11.3638	0.000748888	0.0286016	ENSMUSG00000026417	2.50769
																								ENSMUSG00000029322	-1.16027	2.4822	19.0637	1.26424e-05	0.000479288													ENSMUSG00000021993	0.228705	6.08304	11.3614	0.000749872	0.0286016	ENSMUSG00000045394	-0.984186
																								ENSMUSG00000049038	0.526252	4.45391	19.018	1.29489e-05	0.000489548													ENSMUSG00000021731	0.201734	5.12277	11.3531	0.000753235	0.0286016	ENSMUSG00000033083	-0.715388
																								ENSMUSG00000024798	0.862161	0.3192	19.002	1.30579e-05	0.000492304													ENSMUSG00000009376	-0.865885	2.15158	11.3513	0.000753934	0.0286016	ENSMUSG00000027375	-0.749164
																								ENSMUSG00000022512	-1.46271	-0.283055	18.9807	1.32051e-05	0.000496481													ENSMUSG00000057751	-0.782062	4.02083	11.3314	0.000762062	0.0287576	ENSMUSG00000032418	1.07356
																								ENSMUSG00000025791	0.427961	7.80072	18.9573	1.33675e-05	0.000501208													ENSMUSG00000060572	-0.69663	1.78935	11.3297	0.000762792	0.0287576	ENSMUSG00000024456	-0.649693
																								ENSMUSG00000027068	-1.44555	0.847603	18.9468	1.34414e-05	0.000502597													ENSMUSG00000050394	-0.454624	0.593404	11.3259	0.000764328	0.0287576	ENSMUSG00000015027	2.1467
																								ENSMUSG00000006498	-0.294514	5.96675	18.9389	1.34975e-05	0.000502768													ENSMUSG00000031568	0.221301	5.35995	11.2928	0.000778087	0.0291953	ENSMUSG00000018474	0.887176
																								ENSMUSG00000037119	-0.283405	5.14164	18.9347	1.35267e-05	0.000502768													ENSMUSG00000021906	0.232077	6.0943	11.2587	0.000792506	0.0296553	ENSMUSG00000031391	-0.723903
																								ENSMUSG00000032584	-0.632244	3.39964	18.9305	1.35565e-05	0.000502768													ENSMUSG00000067818	-0.586764	6.25555	11.2437	0.000798951	0.0298152	ENSMUSG00000064036	-3.19225
																								ENSMUSG00000041733	0.475644	7.06876	18.9177	1.3648e-05	0.000504791													ENSMUSG00000024759	-0.253374	5.88584	11.2314	0.000804235	0.0299311	ENSMUSG00000026155	0.629807
																								ENSMUSG00000031373	-1.21431	2.25534	18.8652	1.40285e-05	0.000517463													ENSMUSG00000031538	-0.268011	4.88828	11.2176	0.000810257	0.0300737	ENSMUSG00000019877	0.590415
																								ENSMUSG00000027809	0.439833	9.09932	18.8311	1.42819e-05	0.000525388													ENSMUSG00000026672	0.445013	6.91945	11.2105	0.000813364	0.0301076	ENSMUSG00000054385	-3.75866
																								ENSMUSG00000021178	0.261826	6.77648	18.7463	1.49314e-05	0.000547271													ENSMUSG00000020954	0.216159	6.88356	11.2008	0.000817633	0.0301843	ENSMUSG00000047878	-1.12315
																								ENSMUSG00000001739	-0.937914	4.35778	18.743	1.49569e-05	0.000547271													ENSMUSG00000050382	-0.392628	2.28661	11.1795	0.000827067	0.030319	ENSMUSG00000034875	1.87958
																								ENSMUSG00000021809	0.374023	4.6684	18.6992	1.53051e-05	0.000558512													ENSMUSG00000074743	-0.255799	6.50843	11.1789	0.000827318	0.030319	ENSMUSG00000024098	-0.668067
																								ENSMUSG00000037010	1.1461	4.07339	18.6883	1.53927e-05	0.000560213													ENSMUSG00000037523	0.238766	6.45593	11.1776	0.000827905	0.030319	ENSMUSG00000025977	2.69602
																								ENSMUSG00000026853	0.398719	9.2667	18.6634	1.55946e-05	0.000566051													ENSMUSG00000034009	-0.765341	5.21611	11.1597	0.000835938	0.0304766	ENSMUSG00000034709	0.578221
																								ENSMUSG00000032479	0.359178	8.93077	18.6381	1.58029e-05	0.00057209													ENSMUSG00000058571	-0.284259	3.7488	11.1581	0.000836647	0.0304766	ENSMUSG00000034762	1.13777
																								ENSMUSG00000040751	-0.657521	2.16196	18.6282	1.58851e-05	0.000573546													ENSMUSG00000025220	0.156208	7.34069	11.1442	0.000842932	0.0305889	ENSMUSG00000032513	0.670102
																								ENSMUSG00000062309	-0.892639	1.84812	18.6096	1.60407e-05	0.000577633													ENSMUSG00000026342	0.283074	6.71558	11.1415	0.000844186	0.0305889	ENSMUSG00000029672	-0.741048
																								ENSMUSG00000026701	0.370242	7.31161	18.6008	1.61149e-05	0.000578779													ENSMUSG00000027439	0.189675	5.51358	11.1246	0.000851924	0.0307881	ENSMUSG00000027452	-0.782843
																								ENSMUSG00000038670	0.656381	3.65823	18.5928	1.61833e-05	0.00057908													ENSMUSG00000025140	-0.625835	0.385875	11.1007	0.00086293	0.031104	ENSMUSG00000030319	-1.35376
																								ENSMUSG00000027411	-0.284439	4.86702	18.5898	1.62081e-05	0.00057908													ENSMUSG00000026571	0.225057	6.88864	11.0714	0.000876682	0.031517	ENSMUSG00000022421	-1.55121
																								ENSMUSG00000000278	-0.433079	4.33661	18.5848	1.62507e-05	0.000579085													ENSMUSG00000031342	-0.306827	5.06407	11.0598	0.000882213	0.031633	ENSMUSG00000074179	-4.45619
																								ENSMUSG00000027642	-0.205319	6.85214	18.5639	1.64305e-05	0.000583969													ENSMUSG00000026853	0.229998	9.27857	11.0228	0.000900004	0.0321869	ENSMUSG00000016386	1.21544
																								ENSMUSG00000027340	-0.340923	5.30993	18.5488	1.65606e-05	0.000587063													ENSMUSG00000070644	-0.672576	-0.865153	10.9966	0.000912815	0.0325602	ENSMUSG00000017176	-1.30881
																								ENSMUSG00000027248	-0.36653	7.83827	18.5294	1.67301e-05	0.000591535													ENSMUSG00000064363	0.286832	12.9312	10.9833	0.000919352	0.032694	ENSMUSG00000005950	-0.807879
																								ENSMUSG00000048373	-2.18342	2.83427	18.5163	1.68454e-05	0.000592797													ENSMUSG00000008393	-0.290025	5.49694	10.9794	0.000921326	0.032694	ENSMUSG00000034560	0.885636
																								ENSMUSG00000046671	0.314765	7.42457	18.5155	1.68527e-05	0.000592797													ENSMUSG00000054400	-0.322675	1.96867	10.966	0.000927975	0.032845	ENSMUSG00000024650	1.01876
																								ENSMUSG00000016918	-0.861216	6.74954	18.5087	1.69129e-05	0.000593386													ENSMUSG00000021451	0.214831	5.70223	10.9501	0.000935978	0.0329074	ENSMUSG00000021750	-1.2551
																								ENSMUSG00000030990	0.483758	4.52026	18.499	1.69995e-05	0.000594481													ENSMUSG00000025429	0.43343	5.02662	10.9452	0.000938477	0.0329074	ENSMUSG00000028381	1.01664
																								ENSMUSG00000038084	0.434241	7.8318	18.4954	1.70312e-05	0.000594481													ENSMUSG00000038648	-0.445399	6.41632	10.9439	0.000939098	0.0329074	ENSMUSG00000064127	1.06666
																								ENSMUSG00000032068	-1.23148	1.95567	18.4845	1.71288e-05	0.000596361													ENSMUSG00000068606	2.45827	3.50292	10.9384	0.00094192	0.0329074	ENSMUSG00000023333	-2.22975
																								ENSMUSG00000020843	0.317322	4.70339	18.4656	1.72996e-05	0.000599639													ENSMUSG00000005683	0.247878	10.3824	10.9345	0.000943894	0.0329074	ENSMUSG00000036957	-1.16554
																								ENSMUSG00000041075	-0.627241	4.35625	18.4611	1.73407e-05	0.000599639													ENSMUSG00000041426	0.249294	6.37353	10.9341	0.000944113	0.0329074	ENSMUSG00000024039	1.28761
																								ENSMUSG00000016458	-0.656489	3.91877	18.4596	1.73547e-05	0.000599639													ENSMUSG00000041959	-0.320715	5.53608	10.9113	0.000955803	0.0331049	ENSMUSG00000030671	-0.842172
																								ENSMUSG00000025272	-0.793278	1.68689	18.4514	1.74292e-05	0.00060069													ENSMUSG00000033420	-0.579714	4.53579	10.9097	0.000956602	0.0331049	ENSMUSG00000021263	2.18968
																								ENSMUSG00000004667	0.257608	5.77145	18.4215	1.77045e-05	0.000608641													ENSMUSG00000032327	-1.03693	-0.299293	10.9082	0.00095738	0.0331049	ENSMUSG00000027762	1.82113
																								ENSMUSG00000010914	0.502555	6.96294	18.3962	1.79418e-05	0.000614998													ENSMUSG00000051579	-0.310381	4.64158	10.9043	0.000959423	0.0331049	ENSMUSG00000032849	-1.3337
																								ENSMUSG00000038936	0.381549	6.65323	18.3922	1.79795e-05	0.000614998													ENSMUSG00000015217	0.226955	5.41857	10.893	0.000965287	0.0332238	ENSMUSG00000029102	-1.62273
																								ENSMUSG00000039716	-1.09212	1.44502	18.3859	1.80391e-05	0.000615494													ENSMUSG00000037206	-0.416196	5.10379	10.8818	0.000971128	0.0333413	ENSMUSG00000043088	-1.19488
																								ENSMUSG00000023039	-1.25899	3.3809	18.3715	1.81753e-05	0.000618596													ENSMUSG00000034687	-1.033	2.88291	10.8571	0.000984196	0.0336073	ENSMUSG00000033770	-0.841797
																								ENSMUSG00000057719	0.825176	4.89864	18.3631	1.82555e-05	0.000619779													ENSMUSG00000025083	-0.447368	2.6576	10.8542	0.000985709	0.0336073	ENSMUSG00000028776	-0.640189
																								ENSMUSG00000024805	0.282329	6.34404	18.3422	1.84572e-05	0.000625073													ENSMUSG00000043017	-0.364119	3.00167	10.8491	0.000988432	0.0336073	ENSMUSG00000046324	-0.64821
																								ENSMUSG00000033526	0.499325	6.47701	18.3216	1.8658e-05	0.000630308													ENSMUSG00000041779	-0.266188	3.82299	10.8487	0.000988665	0.0336073	ENSMUSG00000074768	-2.45039
																								ENSMUSG00000018362	0.586754	6.2136	18.3068	1.88039e-05	0.000633668													ENSMUSG00000005533	-0.261715	5.49545	10.831	0.000998152	0.033846	ENSMUSG00000035638	-0.917001
																								ENSMUSG00000028487	-0.888261	1.01942	18.2965	1.89052e-05	0.000635511													ENSMUSG00000035506	-1.06126	-0.0980024	10.8213	0.00100337	0.0339351	ENSMUSG00000057969	-0.811898
																								ENSMUSG00000039701	-0.493006	4.43033	18.271	1.91606e-05	0.000641935													ENSMUSG00000039395	0.288385	4.60715	10.817	0.00100572	0.0339351	ENSMUSG00000040170	0.74152
																								ENSMUSG00000036854	0.636719	8.96241	18.268	1.91903e-05	0.000641935													ENSMUSG00000079523	-0.342999	5.70122	10.8013	0.00101429	0.0341403	ENSMUSG00000053886	-0.846897
																								ENSMUSG00000038991	-0.364625	6.31993	18.2631	1.92396e-05	0.00064201													ENSMUSG00000032353	-0.291351	4.89907	10.7884	0.00102139	0.0341404	ENSMUSG00000029669	-0.73145
																								ENSMUSG00000035413	-0.671049	4.76808	18.2423	1.94515e-05	0.000647498													ENSMUSG00000040212	-0.385243	4.18336	10.7858	0.0010228	0.0341404	ENSMUSG00000033653	1.22438
																								ENSMUSG00000025745	0.473837	10.3524	18.2326	1.95507e-05	0.000648134													ENSMUSG00000033022	-1.36027	3.88622	10.7838	0.00102393	0.0341404	ENSMUSG00000038121	0.671903
																								ENSMUSG00000049382	-1.48374	1.45963	18.2311	1.95656e-05	0.000648134													ENSMUSG00000020241	-0.303332	7.05236	10.7832	0.00102424	0.0341404	ENSMUSG00000051397	-1.04118
																								ENSMUSG00000027618	0.299022	6.37728	18.2188	1.96921e-05	0.000649701													ENSMUSG00000038195	0.269666	5.20256	10.7422	0.0010472	0.0348213	ENSMUSG00000033114	0.958787
																								ENSMUSG00000037151	0.385366	5.80512	18.2173	1.97081e-05	0.000649701													ENSMUSG00000034282	-0.9179	1.4243	10.7297	0.00105428	0.0348951	ENSMUSG00000024942	-0.720613
																								ENSMUSG00000034088	0.309769	9.42671	18.2109	1.97746e-05	0.000650323													ENSMUSG00000047090	-0.253192	3.37823	10.7259	0.00105648	0.0348951	ENSMUSG00000052459	0.572289
																								ENSMUSG00000018849	-1.02561	2.26037	18.205	1.98355e-05	0.000650757													ENSMUSG00000027668	0.225658	8.67949	10.7249	0.00105704	0.0348951	ENSMUSG00000021707	0.551584
																								ENSMUSG00000060206	-0.529461	4.25056	18.1781	2.01182e-05	0.000657921													ENSMUSG00000027750	-0.35771	5.18807	10.7177	0.00106113	0.0349461	ENSMUSG00000074457	-0.704506
																								ENSMUSG00000028607	0.439776	7.35362	18.175	2.01503e-05	0.000657921													ENSMUSG00000041075	-0.398373	4.10824	10.6958	0.00107377	0.0352369	ENSMUSG00000026384	0.678622
																								ENSMUSG00000025723	1.04614	0.933074	18.1579	2.03328e-05	0.000661037													ENSMUSG00000059923	0.137209	6.38549	10.6936	0.00107509	0.0352369	ENSMUSG00000036151	-1.58926
																								ENSMUSG00000042357	-1.48108	0.346637	18.1547	2.03671e-05	0.000661037													ENSMUSG00000034354	0.137438	6.60027	10.6693	0.00108931	0.0355744	ENSMUSG00000063063	2.73544
																								ENSMUSG00000054676	0.341959	5.69675	18.1501	2.04157e-05	0.000661037													ENSMUSG00000030541	0.297509	10.6597	10.6671	0.00109057	0.0355744	ENSMUSG00000024313	1.45356
																								ENSMUSG00000026610	0.447879	5.84024	18.1458	2.04618e-05	0.000661037													ENSMUSG00000026926	0.207478	7.4488	10.6464	0.00110284	0.035661	ENSMUSG00000044165	4.235
																								ENSMUSG00000030772	-1.33197	7.76803	18.1434	2.04879e-05	0.000661037													ENSMUSG00000030168	0.210652	7.05883	10.6434	0.00110467	0.035661	ENSMUSG00000053175	1.44252
																								ENSMUSG00000052430	-1.16481	0.162616	18.1076	2.08763e-05	0.000668499													ENSMUSG00000049134	0.391541	9.25074	10.6434	0.00110467	0.035661	ENSMUSG00000027296	-2.1008
																								ENSMUSG00000033684	-0.428278	5.24588	18.1068	2.08853e-05	0.000668499													ENSMUSG00000056900	0.296333	8.02267	10.6417	0.00110565	0.035661	ENSMUSG00000055805	0.888238
																								ENSMUSG00000064363	0.477274	12.8778	18.1052	2.09034e-05	0.000668499													ENSMUSG00000022091	-0.322094	5.58396	10.6408	0.00110621	0.035661	ENSMUSG00000049878	0.898361
																								ENSMUSG00000021451	0.301879	5.66559	18.1041	2.09151e-05	0.000668499													ENSMUSG00000000154	-0.639601	-0.479266	10.6285	0.00111355	0.0358137	ENSMUSG00000020271	0.532424
																								ENSMUSG00000050390	-0.685759	3.36014	18.0938	2.10289e-05	0.000669107													ENSMUSG00000028860	-0.921522	0.587104	10.5936	0.0011348	0.0362887	ENSMUSG00000003477	3.39314
																								ENSMUSG00000025044	-0.616497	3.29452	18.0935	2.10322e-05	0.000669107													ENSMUSG00000020156	-0.216218	4.53357	10.5918	0.00113591	0.0362887	ENSMUSG00000056665	-1.29279
																								ENSMUSG00000033819	0.252215	4.59648	18.0854	2.11213e-05	0.000670379													ENSMUSG00000038583	0.22215	12.659	10.5912	0.00113625	0.0362887	ENSMUSG00000047139	-0.910351
																								ENSMUSG00000018932	0.295815	6.13913	18.0796	2.11859e-05	0.000670871													ENSMUSG00000022949	-0.878675	0.0939504	10.5833	0.00114112	0.0363208	ENSMUSG00000027978	-1.55752
																								ENSMUSG00000093661	0.294445	5.53284	18.0726	2.12641e-05	0.000671787													ENSMUSG00000020758	-0.656543	3.02624	10.5772	0.00114489	0.0363208	ENSMUSG00000036158	-0.981231
																								ENSMUSG00000002204	-1.12765	1.25813	18.0664	2.13336e-05	0.000672427													ENSMUSG00000031489	-1.5567	1.2381	10.5767	0.00114519	0.0363208	ENSMUSG00000033499	0.944431
																								ENSMUSG00000016664	0.401644	8.12894	18.0233	2.18223e-05	0.000686105													ENSMUSG00000062312	-0.337261	4.3713	10.567	0.00115123	0.0364283	ENSMUSG00000020156	-0.878552
																								ENSMUSG00000041959	-0.49755	5.62764	18.0193	2.18681e-05	0.000686105													ENSMUSG00000024810	-0.454136	4.00715	10.5592	0.00115614	0.0364993	ENSMUSG00000040265	-0.973036
																								ENSMUSG00000018411	0.819571	6.76266	18.0002	2.20887e-05	0.000690725													ENSMUSG00000025940	0.223991	6.49286	10.5472	0.00116366	0.0366525	ENSMUSG00000028518	0.669431
																								ENSMUSG00000029368	-4.43456	2.47255	17.9978	2.21166e-05	0.000690725													ENSMUSG00000034059	-0.666614	0.449305	10.5384	0.00116917	0.036742	ENSMUSG00000046722	0.628202
																								ENSMUSG00000029432	0.404074	9.31167	17.9854	2.22606e-05	0.000693108													ENSMUSG00000027099	0.202952	6.49544	10.5236	0.0011786	0.0369536	ENSMUSG00000030873	-0.836139
																								ENSMUSG00000043518	0.446125	5.16874	17.9825	2.22944e-05	0.000693108													ENSMUSG00000007646	-0.343003	1.32615	10.5169	0.00118291	0.0370043	ENSMUSG00000026767	0.49674
																								ENSMUSG00000021906	0.321388	5.99008	17.9736	2.23992e-05	0.000693898													ENSMUSG00000024924	0.261134	8.95453	10.5043	0.00119097	0.0371628	ENSMUSG00000032826	-1.1331
																								ENSMUSG00000118667	-0.92413	3.74613	17.9717	2.24215e-05	0.000693898													ENSMUSG00000031958	0.280153	5.11239	10.4998	0.00119387	0.0371628	ENSMUSG00000045314	-0.930196
																								ENSMUSG00000042985	-1.12611	6.93878	17.9501	2.26772e-05	0.000700222													ENSMUSG00000037824	-0.221864	4.24109	10.4964	0.00119609	0.0371628	ENSMUSG00000029458	0.824564
																								ENSMUSG00000031028	-1.05512	0.876044	17.9441	2.27483e-05	0.000700833													ENSMUSG00000030872	0.196221	6.24434	10.4903	0.00120003	0.0372009	ENSMUSG00000030703	-1.05874
																								ENSMUSG00000047746	0.531784	8.32723	17.9207	2.30298e-05	0.000707906													ENSMUSG00000032306	0.341689	6.69266	10.4402	0.00123301	0.0381371	ENSMUSG00000024863	-2.71082
																								ENSMUSG00000026580	-1.08618	2.44659	17.9088	2.31741e-05	0.000710743													ENSMUSG00000010277	0.275927	8.80108	10.4284	0.0012409	0.0382951	ENSMUSG00000020773	0.885818
																								ENSMUSG00000028773	0.491985	11.3786	17.8946	2.33485e-05	0.000714484													ENSMUSG00000026112	0.234352	7.43779	10.4149	0.00125	0.0384542	ENSMUSG00000032280	0.870638
																								ENSMUSG00000036867	-0.699299	4.50053	17.8764	2.3573e-05	0.000719741													ENSMUSG00000018446	0.23637	6.45342	10.4125	0.00125166	0.0384542	ENSMUSG00000030720	-0.658312
																								ENSMUSG00000026492	0.322313	5.19445	17.8355	2.40847e-05	0.000733724													ENSMUSG00000040321	0.228223	4.92287	10.3994	0.00126058	0.0386417	ENSMUSG00000039193	2.61085
																								ENSMUSG00000022215	0.436195	6.37708	17.8187	2.42987e-05	0.000738595													ENSMUSG00000032826	0.246163	7.44072	10.3892	0.00126752	0.0387681	ENSMUSG00000031725	3.34409
																								ENSMUSG00000054793	0.490338	4.13958	17.7477	2.52221e-05	0.000763996													ENSMUSG00000020027	-0.284936	5.57819	10.3847	0.00127067	0.038778	ENSMUSG00000024245	1.45454
																								ENSMUSG00000064215	-0.730747	5.14349	17.7453	2.52541e-05	0.000763996													ENSMUSG00000043419	-0.419193	-0.0076886	10.3727	0.00127894	0.038944	ENSMUSG00000029188	-1.45125
																								ENSMUSG00000007030	0.540983	4.05438	17.7409	2.53123e-05	0.000763996													ENSMUSG00000030046	-1.49436	8.02102	10.3611	0.00128698	0.0389856	ENSMUSG00000070738	0.782709
																								ENSMUSG00000026229	0.280871	6.9705	17.7375	2.53583e-05	0.000763996													ENSMUSG00000013663	0.200362	6.41395	10.3575	0.00128946	0.0389856	ENSMUSG00000022620	-0.603617
																								ENSMUSG00000027035	-0.644257	4.14769	17.7285	2.54774e-05	0.000765346													ENSMUSG00000026344	-0.693177	1.86844	10.3484	0.00129588	0.0389856	ENSMUSG00000026558	-0.770426
																								ENSMUSG00000036144	0.567769	4.00085	17.7232	2.55487e-05	0.000765346													ENSMUSG00000021666	0.208636	6.11097	10.3478	0.00129626	0.0389856	ENSMUSG00000031605	0.680285
																								ENSMUSG00000027422	-0.207807	7.49829	17.7215	2.55714e-05	0.000765346													ENSMUSG00000027996	-0.915574	2.3591	10.3468	0.00129699	0.0389856	ENSMUSG00000025185	-1.57376
																								ENSMUSG00000006356	0.347586	9.83641	17.7114	2.57079e-05	0.000767748													ENSMUSG00000025479	-0.978796	2.85523	10.3436	0.00129921	0.0389856	ENSMUSG00000027332	0.711604
																								ENSMUSG00000061130	0.363348	6.95577	17.6953	2.59272e-05	0.000772607													ENSMUSG00000040703	-0.905017	3.32681	10.34	0.00130178	0.0389856	ENSMUSG00000075304	1.07699
																								ENSMUSG00000018008	-0.534834	4.32712	17.6724	2.62408e-05	0.000779407													ENSMUSG00000028145	0.263111	4.13675	10.335	0.0013053	0.0389856	ENSMUSG00000027184	0.59963
																								ENSMUSG00000040998	-1.02211	2.49227	17.6667	2.63192e-05	0.000779407													ENSMUSG00000018537	-0.277222	3.00162	10.331	0.00130814	0.0389856	ENSMUSG00000002413	0.777126
																								ENSMUSG00000033365	0.484899	6.26152	17.6662	2.63267e-05	0.000779407													ENSMUSG00000063358	0.126081	7.25094	10.3302	0.0013087	0.0389856	ENSMUSG00000035540	-3.04041
																								ENSMUSG00000036278	0.472957	7.10821	17.6521	2.65215e-05	0.000783476													ENSMUSG00000023307	0.192297	5.94875	10.31	0.00132314	0.0393304	ENSMUSG00000021556	-0.978006
																								ENSMUSG00000038801	0.77912	4.1319	17.6329	2.67912e-05	0.000789733													ENSMUSG00000027782	0.16437	7.04279	10.2944	0.00133437	0.0395047	ENSMUSG00000036687	-0.54083
																								ENSMUSG00000047414	-0.747355	5.00901	17.586	2.74597e-05	0.000807261													ENSMUSG00000042895	0.508696	6.47854	10.2938	0.00133475	0.0395047	ENSMUSG00000030970	-0.747085
																								ENSMUSG00000020758	-0.883828	3.52096	17.583	2.75041e-05	0.000807261													ENSMUSG00000050640	0.828998	2.12251	10.2889	0.00133835	0.0395258	ENSMUSG00000022500	-0.721916
																								ENSMUSG00000057378	-1.17156	3.58752	17.5757	2.76094e-05	0.000808613													ENSMUSG00000058704	0.21908	5.45771	10.2768	0.00134714	0.0397002	ENSMUSG00000064373	1.20313
																								ENSMUSG00000020456	0.513215	11.2138	17.5449	2.80598e-05	0.000820044													ENSMUSG00000021186	-0.385013	5.12983	10.2589	0.00136024	0.0400004	ENSMUSG00000026781	0.57378
																								ENSMUSG00000030562	-0.81133	1.78724	17.5381	2.81608e-05	0.00082027													ENSMUSG00000027809	0.268615	9.22261	10.2517	0.00136556	0.0400712	ENSMUSG00000022680	0.625831
																								ENSMUSG00000031985	0.313433	7.9912	17.5363	2.81878e-05	0.00082027													ENSMUSG00000041592	-0.639206	1.46076	10.2428	0.00137223	0.0401225	ENSMUSG00000040651	1.12137
																								ENSMUSG00000027180	0.291601	6.54043	17.5176	2.84665e-05	0.00082662													ENSMUSG00000030770	-0.159597	6.24181	10.2415	0.00137316	0.0401225	ENSMUSG00000042312	-0.821818
																								ENSMUSG00000063011	-1.17402	6.01407	17.5128	2.85383e-05	0.000826945													ENSMUSG00000029851	-0.324576	3.00638	10.2128	0.00139473	0.0406662	ENSMUSG00000086596	3.40507
																								ENSMUSG00000031568	0.318178	5.24883	17.4726	2.91481e-05	0.000842025													ENSMUSG00000041220	-0.945767	3.12875	10.2033	0.00140191	0.0407485	ENSMUSG00000018796	-1.27132
																								ENSMUSG00000037685	0.345807	6.05805	17.4704	2.91821e-05	0.000842025													ENSMUSG00000034573	-0.375237	4.20182	10.2006	0.00140395	0.0407485	ENSMUSG00000030304	0.531202
																								ENSMUSG00000027889	-0.51258	3.80821	17.4538	2.94376e-05	0.000847603													ENSMUSG00000031353	0.153836	7.44025	10.1958	0.00140759	0.0407485	ENSMUSG00000025927	-0.703285
																								ENSMUSG00000050640	1.45391	2.61907	17.4443	2.95851e-05	0.000850057													ENSMUSG00000044551	-0.485693	0.724479	10.1824	0.00141785	0.0407485	ENSMUSG00000037242	0.632546
																								ENSMUSG00000039126	0.99964	7.75485	17.4317	2.97813e-05	0.000853898													ENSMUSG00000036298	-0.715381	2.01148	10.1809	0.001419	0.0407485	ENSMUSG00000025745	-0.658274
																								ENSMUSG00000017057	0.327326	5.72262	17.4106	3.01135e-05	0.000861613													ENSMUSG00000038276	-0.81954	-0.577222	10.1799	0.00141981	0.0407485	ENSMUSG00000027599	0.531199
																								ENSMUSG00000062077	0.606966	7.47743	17.3992	3.0295e-05	0.000864992													ENSMUSG00000033576	-0.903298	0.887521	10.1772	0.00142186	0.0407485	ENSMUSG00000004151	1.56325
																								ENSMUSG00000053626	-1.08087	2.45992	17.3877	3.04793e-05	0.000868176													ENSMUSG00000026409	0.358155	6.7788	10.1747	0.00142382	0.0407485	ENSMUSG00000093930	0.930497
																								ENSMUSG00000009281	-0.852897	6.88171	17.3832	3.05514e-05	0.000868176													ENSMUSG00000041577	-0.253945	5.98607	10.1741	0.00142425	0.0407485	ENSMUSG00000031461	-0.940869
																								ENSMUSG00000032334	-0.416042	5.93197	17.3803	3.05973e-05	0.000868176													ENSMUSG00000032563	0.246377	6.73043	10.1655	0.00143089	0.0408533	ENSMUSG00000035954	1.42661
																								ENSMUSG00000014846	-0.554545	5.70936	17.3662	3.08257e-05	0.00087265													ENSMUSG00000036452	0.239994	6.48178	10.1603	0.001435	0.0408855	ENSMUSG00000092060	2.53957
																								ENSMUSG00000029780	0.260705	6.18663	17.3627	3.08829e-05	0.00087265													ENSMUSG00000068877	-0.383158	2.65377	10.1545	0.00143953	0.0409297	ENSMUSG00000027531	0.598401
																								ENSMUSG00000056899	0.398537	3.59159	17.3293	3.14295e-05	0.000885994													ENSMUSG00000020949	0.210768	7.24005	10.1383	0.00145223	0.0410411	ENSMUSG00000034640	0.755975
																								ENSMUSG00000032870	0.306067	5.78953	17.326	3.1485e-05	0.000885994													ENSMUSG00000026260	0.207522	8.88414	10.1347	0.00145501	0.0410411	ENSMUSG00000030825	-1.74182
																								ENSMUSG00000027332	0.360245	8.50563	17.3209	3.15698e-05	0.000886552													ENSMUSG00000074698	0.151155	7.17189	10.1308	0.00145812	0.0410411	ENSMUSG00000024856	0.822881
																								ENSMUSG00000032047	0.61769	8.81783	17.314	3.16837e-05	0.000887924													ENSMUSG00000024990	-1.14153	1.66047	10.1308	0.00145813	0.0410411	ENSMUSG00000036330	0.708413
																								ENSMUSG00000057751	-1.03199	4.5408	17.3034	3.18615e-05	0.000891078													ENSMUSG00000037370	-0.351799	3.45779	10.1303	0.00145854	0.0410411	ENSMUSG00000018211	-0.783393
																								ENSMUSG00000057123	-1.1744	5.65786	17.2953	3.19972e-05	0.000892148													ENSMUSG00000014592	0.213995	6.87478	10.1267	0.00146138	0.0410411	ENSMUSG00000071633	1.3525
																								ENSMUSG00000039518	-1.32536	-0.279219	17.2934	3.20305e-05	0.000892148													ENSMUSG00000003721	0.143888	5.98153	10.1203	0.00146642	0.0410986	ENSMUSG00000035829	-0.977386
																								ENSMUSG00000066839	0.352706	6.32026	17.2814	3.22327e-05	0.00089595													ENSMUSG00000024011	-0.412128	5.97969	10.0945	0.00148713	0.0415943	ENSMUSG00000003316	0.709248
																								ENSMUSG00000033499	0.310397	6.70967	17.2763	3.23191e-05	0.000896527													ENSMUSG00000025597	-0.369232	3.70261	10.0842	0.00149542	0.0417201	ENSMUSG00000024165	-0.568232
																								ENSMUSG00000060798	0.507811	5.33251	17.2654	3.25047e-05	0.000899845													ENSMUSG00000003464	0.20873	6.93763	10.0814	0.00149771	0.0417201	ENSMUSG00000002204	-1.27448
																								ENSMUSG00000021187	-1.19	0.529285	17.255	3.26838e-05	0.000902972													ENSMUSG00000051864	0.177382	5.0981	10.0635	0.00151236	0.0419994	ENSMUSG00000026854	0.762857
																								ENSMUSG00000014606	0.445819	8.90249	17.2473	3.28159e-05	0.00090479													ENSMUSG00000020817	0.146925	6.14959	10.0617	0.00151385	0.0419994	ENSMUSG00000041248	-0.813085
																								ENSMUSG00000030357	0.451467	8.32762	17.2399	3.29447e-05	0.000906512													ENSMUSG00000014606	0.230036	8.8519	10.0442	0.00152827	0.0421093	ENSMUSG00000038745	0.870797
																								ENSMUSG00000033557	0.235932	6.60749	17.2019	3.36092e-05	0.000921864													ENSMUSG00000020682	-0.395062	2.11744	10.0437	0.00152871	0.0421093	ENSMUSG00000025467	-3.42727
																								ENSMUSG00000021253	-0.542996	5.01786	17.2003	3.36378e-05	0.000921864													ENSMUSG00000000278	-0.22638	4.24882	10.0408	0.00153109	0.0421093	ENSMUSG00000023914	0.855395
																								ENSMUSG00000023094	0.409068	5.55894	17.1824	3.39566e-05	0.000928736													ENSMUSG00000028348	0.332534	7.11194	10.0403	0.00153156	0.0421093	ENSMUSG00000051517	1.5019
																								ENSMUSG00000021772	0.361834	5.2753	17.1462	3.46105e-05	0.000944729													ENSMUSG00000049556	-0.956819	1.53096	10.0384	0.00153314	0.0421093	ENSMUSG00000028189	1.08084
																								ENSMUSG00000038663	0.499655	9.08819	17.1185	3.51178e-05	0.000956662													ENSMUSG00000037278	-0.302662	2.12085	10.0065	0.00155986	0.0427575	ENSMUSG00000030223	-0.788351
																								ENSMUSG00000043068	0.684916	0.797581	17.1129	3.52215e-05	0.000957575													ENSMUSG00000039470	-0.398136	2.85747	9.99179	0.0015724	0.0430154	ENSMUSG00000006269	-0.720457
																								ENSMUSG00000027371	0.435788	4.74148	17.1024	3.54182e-05	0.000960084													ENSMUSG00000015843	0.261834	5.76601	9.98427	0.00157883	0.0431056	ENSMUSG00000039680	-0.585987
																								ENSMUSG00000022479	-1.23154	1.80641	17.1004	3.54545e-05	0.000960084													ENSMUSG00000055301	-1.27788	-0.126581	9.97772	0.00158445	0.0431732	ENSMUSG00000042613	-0.737525
																								ENSMUSG00000036019	-0.411988	3.83625	17.0512	3.63845e-05	0.000983319													ENSMUSG00000034007	0.173162	4.7449	9.96756	0.00159322	0.0433216	ENSMUSG00000051375	0.654238
																								ENSMUSG00000007646	-0.552314	1.42094	17.0055	3.72708e-05	0.00100528													ENSMUSG00000043518	0.350246	5.02937	9.96412	0.00159621	0.0433216	ENSMUSG00000071711	-1.14242
																								ENSMUSG00000031230	0.573538	3.74424	16.9988	3.74042e-05	0.00100689													ENSMUSG00000032657	-0.323801	2.83263	9.94106	0.00161632	0.043781	ENSMUSG00000023032	-0.853768
																								ENSMUSG00000046314	-0.56921	4.27231	16.9872	3.76335e-05	0.00101015													ENSMUSG00000046432	-0.47684	2.53396	9.93414	0.00162241	0.0438594	ENSMUSG00000021665	0.764852
																								ENSMUSG00000029804	0.383612	6.01469	16.9851	3.76735e-05	0.00101015													ENSMUSG00000039197	0.193566	7.46145	9.92566	0.00162991	0.0438974	ENSMUSG00000115338	0.723664
																								ENSMUSG00000079445	-1.23618	1.24482	16.9724	3.7927e-05	0.00101496													ENSMUSG00000094910	-0.787144	0.169905	9.92532	0.00163021	0.0438974	ENSMUSG00000005813	0.489396
																								ENSMUSG00000028270	-0.721843	5.06526	16.9567	3.82417e-05	0.00102137													ENSMUSG00000026600	-0.404879	3.74482	9.89495	0.00165733	0.0443686	ENSMUSG00000028238	-0.72728
																								ENSMUSG00000046491	-0.627212	2.96226	16.9472	3.84348e-05	0.00102453													ENSMUSG00000029168	-0.627283	0.666195	9.8911	0.0016608	0.0443686	ENSMUSG00000023039	-0.722073
																								ENSMUSG00000023991	-0.335624	4.1397	16.9339	3.8705e-05	0.00102972													ENSMUSG00000004798	0.156076	6.81691	9.88725	0.00166428	0.0443686	ENSMUSG00000027111	-1.08418
																								ENSMUSG00000039461	0.403708	5.51397	16.9247	3.88914e-05	0.00103266													ENSMUSG00000020544	0.354411	4.00773	9.88459	0.00166669	0.0443686	ENSMUSG00000025986	0.745428
																								ENSMUSG00000039987	0.384254	6.70336	16.9179	3.90315e-05	0.00103328													ENSMUSG00000026185	-0.645679	9.02052	9.88432	0.00166693	0.0443686	ENSMUSG00000058921	1.44027
																								ENSMUSG00000049556	-1.43003	2.1343	16.9162	3.90659e-05	0.00103328													ENSMUSG00000063235	0.250092	4.53083	9.88414	0.00166709	0.0443686	ENSMUSG00000020623	1.03849
																								ENSMUSG00000013584	-1.09128	4.93136	16.9074	3.92493e-05	0.00103612													ENSMUSG00000021973	0.162842	6.66197	9.8649	0.00168462	0.0447483	ENSMUSG00000019359	-2.12589
																								ENSMUSG00000038205	0.421547	6.31827	16.8675	4.00829e-05	0.00105491													ENSMUSG00000040136	-0.432434	5.60582	9.85685	0.00169201	0.0448578	ENSMUSG00000034854	-0.878376
																								ENSMUSG00000032181	-1.17217	-0.471845	16.8659	4.01157e-05	0.00105491													ENSMUSG00000020325	-0.476028	2.446	9.84479	0.00170314	0.0450658	ENSMUSG00000030301	0.501387
																								ENSMUSG00000030257	-0.716415	2.36025	16.8539	4.03707e-05	0.00105958													ENSMUSG00000034993	-0.268197	5.34221	9.83138	0.0017156	0.0453083	ENSMUSG00000024998	-0.81297
																								ENSMUSG00000034684	-0.552177	4.65885	16.8448	4.05641e-05	0.00106261													ENSMUSG00000028717	-0.266125	3.487	9.82308	0.00172335	0.0454258	ENSMUSG00000037992	0.723987
																								ENSMUSG00000022791	-0.376512	5.37172	16.8339	4.07976e-05	0.00106668													ENSMUSG00000042712	-0.306207	4.26793	9.816	0.00173	0.0455136	ENSMUSG00000044080	-0.619849
																								ENSMUSG00000047250	-0.764086	5.08809	16.7936	4.16738e-05	0.0010875													ENSMUSG00000019124	-0.512927	3.86136	9.81178	0.00173398	0.045531	ENSMUSG00000021376	1.0273
																								ENSMUSG00000006221	0.482922	10.9634	16.7773	4.20336e-05	0.0010948													ENSMUSG00000032602	0.23662	7.09707	9.79118	0.00175351	0.045956	ENSMUSG00000019082	1.92489
																								ENSMUSG00000078350	-0.748051	3.85795	16.7649	4.23077e-05	0.00109984													ENSMUSG00000020279	-1.55454	-0.572588	9.78614	0.00175832	0.0459943	ENSMUSG00000032841	-1.11305
																								ENSMUSG00000024302	0.36438	6.07745	16.757	4.24859e-05	0.00110237													ENSMUSG00000027642	-0.140999	6.75274	9.77749	0.00176661	0.0461234	ENSMUSG00000026305	-0.666752
																								ENSMUSG00000024735	0.393945	8.13604	16.7365	4.29463e-05	0.0011122													ENSMUSG00000052854	-0.611097	0.594713	9.77013	0.00177369	0.0461721	ENSMUSG00000039349	0.593956
																								ENSMUSG00000022754	-0.770246	2.5844	16.7199	4.3325e-05	0.00111794													ENSMUSG00000020357	-0.243167	4.92515	9.76857	0.0017752	0.0461721	ENSMUSG00000034731	1.24495
																								ENSMUSG00000000056	0.44685	6.44448	16.7196	4.33316e-05	0.00111794													ENSMUSG00000026489	0.230295	9.31833	9.75252	0.00179077	0.0464888	ENSMUSG00000049580	1.67647
																								ENSMUSG00000010911	0.46549	5.15082	16.7127	4.34887e-05	0.00111987													ENSMUSG00000026492	0.199315	5.10978	9.74686	0.00179629	0.046512	ENSMUSG00000029545	0.718456
																								ENSMUSG00000021929	0.296995	6.55376	16.7066	4.36291e-05	0.00112138													ENSMUSG00000026697	-2.44137	1.83768	9.74367	0.00179941	0.046512	ENSMUSG00000031530	1.29445
																								ENSMUSG00000053460	-0.273703	4.9215	16.6966	4.38585e-05	0.00112515													ENSMUSG00000083649	0.313098	1.80543	9.73729	0.00180567	0.046512	ENSMUSG00000020261	0.899886
																								ENSMUSG00000021579	0.49898	6.69495	16.6926	4.39522e-05	0.00112544													ENSMUSG00000048373	-1.97795	1.78969	9.737	0.00180596	0.046512	ENSMUSG00000017390	-0.960765
																								ENSMUSG00000027188	-0.829911	2.52258	16.6713	4.4448e-05	0.00113601													ENSMUSG00000050821	0.583714	4.37396	9.7328	0.00181008	0.046512	ENSMUSG00000050730	0.743266
																								ENSMUSG00000048497	-0.621007	2.65598	16.6655	4.45848e-05	0.00113737													ENSMUSG00000021178	0.15969	6.83566	9.73088	0.00181198	0.046512	ENSMUSG00000038217	1.3415
																								ENSMUSG00000041762	0.295421	4.27232	16.6598	4.47179e-05	0.00113864													ENSMUSG00000002105	-0.216582	5.01673	9.72412	0.00181866	0.0465963	ENSMUSG00000032121	-0.987521
																								ENSMUSG00000000340	0.359724	6.28486	16.6407	4.51719e-05	0.00114806													ENSMUSG00000031299	0.206725	10.4274	9.71916	0.00182357	0.0466352	ENSMUSG00000021360	0.767026
																								ENSMUSG00000027574	-1.08047	4.23914	16.6149	4.57892e-05	0.00116158													ENSMUSG00000038893	-0.626395	3.84525	9.7146	0.0018281	0.0466598	ENSMUSG00000026255	-0.806215
																								ENSMUSG00000030862	1.693	4.996	16.6004	4.6142e-05	0.00116836													ENSMUSG00000032175	-0.196333	4.83952	9.71136	0.00183133	0.0466598	ENSMUSG00000044156	-0.783093
																								ENSMUSG00000015766	-0.514583	4.36737	16.5954	4.62636e-05	0.00116927													ENSMUSG00000060733	0.189345	4.61441	9.70717	0.00183551	0.0466797	ENSMUSG00000028024	1.12599
																								ENSMUSG00000000876	0.261933	5.05053	16.5795	4.66514e-05	0.00117689													ENSMUSG00000018411	0.429024	6.91343	9.70327	0.0018394	0.0466922	ENSMUSG00000043019	0.694302
																								ENSMUSG00000030861	0.289813	7.47054	16.5726	4.68223e-05	0.00117898													ENSMUSG00000000441	0.126405	7.30153	9.69809	0.0018446	0.0467377	ENSMUSG00000006262	0.575283
																								ENSMUSG00000060671	-0.391829	5.1184	16.5692	4.69071e-05	0.00117898													ENSMUSG00000001983	0.295958	5.31575	9.69284	0.00184988	0.0467852	ENSMUSG00000021061	-1.02642
																								ENSMUSG00000025355	-0.625018	2.81152	16.5626	4.7069e-05	0.00118039													ENSMUSG00000040549	0.18271	6.26604	9.68594	0.00185684	0.0468749	ENSMUSG00000031749	-0.710305
																								ENSMUSG00000024726	0.329994	4.9516	16.56	4.71359e-05	0.00118039													ENSMUSG00000033318	-0.328237	4.05034	9.66637	0.00187672	0.0472899	ENSMUSG00000063296	-0.977052
																								ENSMUSG00000049106	0.314004	5.91383	16.5496	4.7394e-05	0.00118468													ENSMUSG00000024083	0.224847	7.79695	9.65943	0.00188382	0.0473472	ENSMUSG00000031246	-0.585873
																								ENSMUSG00000036298	-0.968625	2.51988	16.5384	4.7674e-05	0.0011895													ENSMUSG00000036087	0.191988	7.57515	9.65686	0.00188646	0.0473472	ENSMUSG00000051579	-0.641334
																								ENSMUSG00000030409	0.423283	9.10761	16.5346	4.77709e-05	0.00118974													ENSMUSG00000021820	0.20806	6.27071	9.65406	0.00188934	0.0473472	ENSMUSG00000040690	-0.759097
																								ENSMUSG00000015627	-1.28169	1.83691	16.5245	4.80255e-05	0.0011939													ENSMUSG00000031565	-0.289583	5.84357	9.64429	0.00189941	0.0475129	ENSMUSG00000073563	0.612252
																								ENSMUSG00000003813	0.237477	5.96011	16.4589	4.97166e-05	0.0012337													ENSMUSG00000059447	0.288486	10.7224	9.63626	0.00190774	0.0475689	ENSMUSG00000035107	-0.676185
																								ENSMUSG00000032232	-0.754039	6.95291	16.4479	5.00062e-05	0.00123499													ENSMUSG00000039607	-0.251309	4.2669	9.63545	0.00190858	0.0475689	ENSMUSG00000001755	0.715246
																								ENSMUSG00000027540	-0.259982	5.11048	16.4454	5.00721e-05	0.00123499													ENSMUSG00000037419	-0.261512	3.96598	9.63062	0.0019136	0.0476078	ENSMUSG00000051159	-4.19899
																								ENSMUSG00000032306	0.410961	6.60703	16.4448	5.00877e-05	0.00123499													ENSMUSG00000029310	0.160876	5.40343	9.61722	0.00192762	0.0477472	ENSMUSG00000032577	-0.978804
																								ENSMUSG00000061979	0.304335	4.88966	16.4432	5.01306e-05	0.00123499													ENSMUSG00000055932	0.130403	6.08941	9.61699	0.00192785	0.0477472	ENSMUSG00000028487	0.937025
																								ENSMUSG00000021993	0.357943	6.21148	16.4207	5.07277e-05	0.00124527													ENSMUSG00000021253	-0.366778	4.76418	9.61529	0.00192964	0.0477472	ENSMUSG00000050777	-1.46859
																								ENSMUSG00000020003	0.302449	5.11712	16.4206	5.07306e-05	0.00124527													ENSMUSG00000046909	0.259746	4.47112	9.58854	0.00195796	0.0483609	ENSMUSG00000052105	-0.981015
																								ENSMUSG00000026205	-1.23995	0.511504	16.4148	5.08851e-05	0.00124682													ENSMUSG00000036856	-0.640551	0.5319	9.57553	0.00197187	0.0484785	ENSMUSG00000035357	1.00571
																								ENSMUSG00000053799	0.335032	5.53885	16.3878	5.16155e-05	0.00126245													ENSMUSG00000027068	-1.04683	0.323882	9.57552	0.00197189	0.0484785	ENSMUSG00000031618	-0.601322
																								ENSMUSG00000047879	0.285041	6.29957	16.3736	5.20032e-05	0.00126931													ENSMUSG00000029686	0.123254	6.64582	9.5742	0.00197331	0.0484785	ENSMUSG00000026174	0.53619
																								ENSMUSG00000030782	-0.450681	4.70118	16.3708	5.20821e-05	0.00126931													ENSMUSG00000020079	0.212421	5.194	9.55713	0.00199174	0.0488438	ENSMUSG00000033781	0.499871
																								ENSMUSG00000027774	0.377763	7.56835	16.3659	5.22167e-05	0.00127033													ENSMUSG00000028098	0.213083	4.65357	9.53789	0.00201273	0.0492706	ENSMUSG00000051934	0.65959
																								ENSMUSG00000036880	0.286481	9.44836	16.3583	5.24258e-05	0.00127314													ENSMUSG00000025212	-0.315618	4.33711	9.52651	0.00202524	0.0494888	ENSMUSG00000027186	-0.799003
																								ENSMUSG00000026344	-1.1144	1.57163	16.3436	5.28341e-05	0.00128078													ENSMUSG00000053819	0.209376	7.76643	9.51777	0.00203491	0.0495682	ENSMUSG00000021904	-0.613133
																								ENSMUSG00000054400	-0.555794	2.01556	16.3364	5.30362e-05	0.0012834													ENSMUSG00000030861	0.175491	7.52479	9.51705	0.00203571	0.0495682	ENSMUSG00000036273	0.821646
																								ENSMUSG00000006818	0.428305	9.12352	16.3269	5.33023e-05	0.0012859													ENSMUSG00000055541	1.01112	0.350896	9.51275	0.00204049	0.0495966	ENSMUSG00000031808	-0.972525
																								ENSMUSG00000020610	0.247862	5.9396	16.326	5.3328e-05	0.0012859													ENSMUSG00000044252	0.165135	6.63102	9.50696	0.00204694	0.0496655	ENSMUSG00000026784	0.802255
																								ENSMUSG00000005338	-0.582819	2.21007	16.3192	5.35183e-05	0.00128822													ENSMUSG00000034327	0.327966	6.46269	9.49632	0.00205884	0.0498618	ENSMUSG00000042225	1.05007
																								ENSMUSG00000020387	-0.269516	4.72711	16.2774	5.47135e-05	0.00131431													ENSMUSG00000020361	0.16334	7.66822	9.49325	0.0020623	0.0498618	ENSMUSG00000039137	0.612157
																								ENSMUSG00000030747	0.581277	7.2752	16.2745	5.47952e-05	0.00131431													ENSMUSG00000053838	0.143991	6.98914	9.48685	0.00206949	0.0499479	ENSMUSG00000033684	-0.780145
																								ENSMUSG00000041119	-0.491321	2.67651	16.267	5.50126e-05	0.00131721																			ENSMUSG00000022763	0.731356
																								ENSMUSG00000032011	-0.573347	4.4397	16.2635	5.51152e-05	0.00131736																			ENSMUSG00000022752	0.547722
																								ENSMUSG00000025151	-0.307086	7.38088	16.2539	5.53966e-05	0.00132064																			ENSMUSG00000027774	0.608063
																								ENSMUSG00000040254	-1.01369	4.88765	16.2522	5.54459e-05	0.00132064																			ENSMUSG00000043518	-1.14668
																								ENSMUSG00000047787	-1.07383	2.08714	16.244	5.56859e-05	0.00132404																			ENSMUSG00000054850	2.33461
																								ENSMUSG00000025917	0.273628	6.05679	16.2305	5.60831e-05	0.00133117																			ENSMUSG00000029370	-0.668639
																								ENSMUSG00000056174	-1.05357	0.910912	16.2247	5.62568e-05	0.00133297																			ENSMUSG00000028613	-1.33894
																								ENSMUSG00000030802	0.281721	6.57319	16.2187	5.64356e-05	0.00133489																			ENSMUSG00000042426	0.738275
																								ENSMUSG00000092060	-0.540585	3.266	16.2137	5.65825e-05	0.00133605																			ENSMUSG00000043719	1.97054
																								ENSMUSG00000019842	-0.425122	3.0649	16.1943	5.71658e-05	0.00134749																			ENSMUSG00000020413	0.868617
																								ENSMUSG00000022594	0.521515	8.08646	16.1854	5.74347e-05	0.0013515																			ENSMUSG00000039110	-0.929469
																								ENSMUSG00000018796	0.355149	9.8518	16.1806	5.75799e-05	0.00135258																			ENSMUSG00000012350	-0.759712
																								ENSMUSG00000027215	-0.684246	4.53847	16.1754	5.77394e-05	0.001354																			ENSMUSG00000023963	-0.821384
																								ENSMUSG00000025268	-0.472692	5.31921	16.1672	5.79896e-05	0.00135753																			ENSMUSG00000078503	2.49017
																								ENSMUSG00000004626	-0.778895	3.42106	16.1564	5.83224e-05	0.00136299																			ENSMUSG00000009376	0.793817
																								ENSMUSG00000001225	-1.22702	3.56071	16.1298	5.91446e-05	0.00137984																			ENSMUSG00000028199	0.610675
																								ENSMUSG00000060450	0.247915	6.91667	16.1094	5.97851e-05	0.0013924																			ENSMUSG00000025544	-0.63077
																								ENSMUSG00000039682	0.320601	5.99137	16.1013	6.00439e-05	0.00139605																			ENSMUSG00000054630	3.44205
																								ENSMUSG00000031312	0.344786	7.39565	16.082	6.06568e-05	0.0014079																			ENSMUSG00000020435	2.05163
																								ENSMUSG00000031465	-0.468105	2.82905	16.0672	6.11326e-05	0.00141653																			ENSMUSG00000020062	1.47527
																								ENSMUSG00000055172	-0.576433	5.08459	16.0637	6.12454e-05	0.00141674																			ENSMUSG00000009470	0.649902
																								ENSMUSG00000001983	0.488491	5.17026	16.0486	6.17376e-05	0.00142571																			ENSMUSG00000010122	0.643064
																								ENSMUSG00000031565	-0.461903	6.0229	16.0365	6.21324e-05	0.0014324																			ENSMUSG00000022641	0.760375
																								ENSMUSG00000052934	0.428516	6.31938	16.0021	6.32723e-05	0.00145622																			ENSMUSG00000021238	0.51164
																								ENSMUSG00000029198	0.351823	6.73122	15.9936	6.35586e-05	0.00146006																			ENSMUSG00000021676	-0.590233
																								ENSMUSG00000027932	-0.552433	1.21101	15.9907	6.3653e-05	0.00146006																			ENSMUSG00000026062	-0.934879
																								ENSMUSG00000019978	-0.321195	6.23167	15.9823	6.39361e-05	0.00146199																			ENSMUSG00000023262	-0.847206
																								ENSMUSG00000030621	0.43749	6.20423	15.9819	6.39514e-05	0.00146199																			ENSMUSG00000041688	0.655576
																								ENSMUSG00000051998	-1.0766	1.4814	15.9685	6.44042e-05	0.00146988																			ENSMUSG00000021187	1.38916
																								ENSMUSG00000022529	-0.268735	4.33474	15.9627	6.46039e-05	0.00147198																			ENSMUSG00000026469	0.659542
																								ENSMUSG00000036782	-0.523116	5.00911	15.9542	6.48921e-05	0.00147608																			ENSMUSG00000054422	-4.69633
																								ENSMUSG00000014303	-0.462766	4.35007	15.9478	6.51131e-05	0.00147864																			ENSMUSG00000072244	-2.00281
																								ENSMUSG00000030278	-1.87179	3.4329	15.9359	6.55228e-05	0.00148547																			ENSMUSG00000067889	-0.931909
																								ENSMUSG00000038762	0.259826	6.53056	15.9271	6.58294e-05	0.00148856																			ENSMUSG00000036206	-0.845473
																								ENSMUSG00000026603	0.527437	6.2023	15.9257	6.58773e-05	0.00148856																			ENSMUSG00000017723	-1.38504
																								ENSMUSG00000024990	-1.54956	2.36035	15.8787	6.7535e-05	0.0015235																			ENSMUSG00000062203	0.622672
																								ENSMUSG00000002329	0.310379	5.85936	15.8681	6.79132e-05	0.0015295																			ENSMUSG00000034245	-0.592708
																								ENSMUSG00000039579	-1.10213	-0.423407	15.8444	6.87703e-05	0.00154625																			ENSMUSG00000041390	-0.718849
																								ENSMUSG00000038608	-0.656238	3.4534	15.8309	6.92625e-05	0.00155204																			ENSMUSG00000036892	-0.989579
																								ENSMUSG00000028860	-1.18375	1.19135	15.8273	6.93954e-05	0.00155204																			ENSMUSG00000025925	0.614563
																								ENSMUSG00000094910	-0.949186	0.674768	15.8264	6.94284e-05	0.00155204																			ENSMUSG00000068037	3.55912
																								ENSMUSG00000038204	0.581431	6.37233	15.8248	6.94852e-05	0.00155204																			ENSMUSG00000063694	0.700723
																								ENSMUSG00000038527	-0.78953	1.72088	15.8206	6.96404e-05	0.00155204																			ENSMUSG00000029718	-0.727971
																								ENSMUSG00000023004	-0.346543	6.51708	15.8187	6.97099e-05	0.00155204																			ENSMUSG00000021069	-0.780776
																								ENSMUSG00000109564	-1.11118	5.55795	15.7882	7.08432e-05	0.0015747																			ENSMUSG00000034522	-0.978042
																								ENSMUSG00000034066	0.466267	4.43162	15.7788	7.11963e-05	0.00157939																			ENSMUSG00000025069	-1.19687
																								ENSMUSG00000033610	0.325059	5.86556	15.7764	7.12853e-05	0.00157939																			ENSMUSG00000038065	0.888257
																								ENSMUSG00000022037	-0.709967	8.63088	15.7678	7.161e-05	0.00158158																			ENSMUSG00000020594	0.540386
																								ENSMUSG00000022091	-0.488746	5.80325	15.7677	7.16159e-05	0.00158158																			ENSMUSG00000068747	-0.504723
																								ENSMUSG00000055239	0.246068	6.5521	15.7474	7.23891e-05	0.00159607																			ENSMUSG00000021720	2.17774
																								ENSMUSG00000022684	0.230311	5.83909	15.7346	7.28807e-05	0.0016023																			ENSMUSG00000056124	-0.760301
																								ENSMUSG00000005533	-0.390327	5.39988	15.7339	7.29067e-05	0.0016023																			ENSMUSG00000038991	-0.567826
																								ENSMUSG00000006360	-0.575023	6.50062	15.7301	7.30524e-05	0.00160292																			ENSMUSG00000032860	-1.12983
																								ENSMUSG00000001761	-0.469594	4.69388	15.7072	7.39409e-05	0.00161818																			ENSMUSG00000021000	0.537997
																								ENSMUSG00000027513	-2.63198	4.04426	15.7061	7.39846e-05	0.00161818																			ENSMUSG00000048497	-0.796365
																								ENSMUSG00000032355	0.278234	6.72324	15.6913	7.45652e-05	0.00162672																			ENSMUSG00000024588	0.456464
																								ENSMUSG00000026926	0.3498	7.39352	15.6901	7.46135e-05	0.00162672																			ENSMUSG00000048701	0.854965
																								ENSMUSG00000067242	1.38697	1.70676	15.6683	7.54798e-05	0.00164298																			ENSMUSG00000028645	-0.645054
																								ENSMUSG00000007279	0.608167	3.43128	15.6617	7.57434e-05	0.00164609																			ENSMUSG00000027130	0.874299
																								ENSMUSG00000044086	0.551803	6.40098	15.6562	7.59617e-05	0.00164821																			ENSMUSG00000024563	0.485504
																								ENSMUSG00000038119	-0.829617	5.79503	15.6503	7.61988e-05	0.00164887																			ENSMUSG00000026994	0.777917
																								ENSMUSG00000020900	-0.329329	6.34052	15.6473	7.63227e-05	0.00164887																			ENSMUSG00000020029	-0.54079
																								ENSMUSG00000059146	-1.38188	2.21719	15.6457	7.63854e-05	0.00164887																			ENSMUSG00000025287	1.01124
																								ENSMUSG00000004798	0.27012	6.8382	15.6435	7.64753e-05	0.00164887																			ENSMUSG00000001521	0.807544
																								ENSMUSG00000039903	-0.68814	1.1893	15.6306	7.6997e-05	0.00165418																			ENSMUSG00000044026	-0.761369
																								ENSMUSG00000045983	0.321497	8.89084	15.63	7.70245e-05	0.00165418																			ENSMUSG00000055629	4.00258
																								ENSMUSG00000028127	0.329323	7.16125	15.6273	7.71315e-05	0.00165418																			ENSMUSG00000006542	2.06898
																								ENSMUSG00000028964	0.281163	6.75954	15.6255	7.72066e-05	0.00165418																			ENSMUSG00000028977	-0.721356
																								ENSMUSG00000026817	0.41927	8.82029	15.5927	7.85585e-05	0.00168051																			ENSMUSG00000027282	0.514394
																								ENSMUSG00000024750	0.262111	7.28505	15.5772	7.92039e-05	0.00169161																			ENSMUSG00000037071	-2.1797
																								ENSMUSG00000022752	0.345469	6.81191	15.5743	7.93252e-05	0.00169161																			ENSMUSG00000052430	-0.897007
																								ENSMUSG00000001027	0.778685	4.32026	15.5553	8.01247e-05	0.00170599																			ENSMUSG00000024413	0.554698
																								ENSMUSG00000060572	-0.738948	2.22198	15.5482	8.04288e-05	0.0017098																			ENSMUSG00000005233	-1.25814
																								ENSMUSG00000022878	-2.2392	3.72936	15.542	8.0692e-05	0.00171273																			ENSMUSG00000031849	-3.42116
																								ENSMUSG00000005469	0.402103	7.81628	15.4996	8.25247e-05	0.00174891																			ENSMUSG00000041293	-0.933532
																								ENSMUSG00000021097	-0.463465	3.29778	15.4909	8.29035e-05	0.00175421																			ENSMUSG00000044092	-1.22613
																								ENSMUSG00000049327	0.483325	7.4148	15.4857	8.31302e-05	0.00175629																			ENSMUSG00000041361	-0.821434
																								ENSMUSG00000021948	-0.413645	4.6582	15.4767	8.35282e-05	0.00176197																			ENSMUSG00000019996	0.674548
																								ENSMUSG00000041012	0.51378	2.69183	15.4426	8.5051e-05	0.00179132																			ENSMUSG00000016382	-0.600967
																								ENSMUSG00000059854	-1.38091	0.825571	15.437	8.53007e-05	0.00179209																			ENSMUSG00000015970	0.799111
																								ENSMUSG00000020473	-0.821682	6.33759	15.4359	8.535e-05	0.00179209																			ENSMUSG00000059336	-0.929135
																								ENSMUSG00000032366	0.362076	12.6909	15.4118	8.64461e-05	0.00181231																			ENSMUSG00000028292	0.58931
																								ENSMUSG00000050295	-0.85647	3.86481	15.405	8.67601e-05	0.00181611																			ENSMUSG00000005686	-0.65043
																								ENSMUSG00000028933	0.430493	2.79248	15.4001	8.69823e-05	0.00181797																			ENSMUSG00000026205	-0.898875
																								ENSMUSG00000021420	0.398563	5.51757	15.3946	8.72388e-05	0.00182054																			ENSMUSG00000031904	-0.732935
																								ENSMUSG00000073838	0.435274	7.20416	15.3825	8.77963e-05	0.00182938																			ENSMUSG00000043621	1.05941
																								ENSMUSG00000022620	-0.315332	5.0724	15.3682	8.84664e-05	0.00184053																			ENSMUSG00000022995	-0.6823
																								ENSMUSG00000060733	0.283503	4.59058	15.3273	9.03995e-05	0.00187789																			ENSMUSG00000036899	-0.805493
																								ENSMUSG00000039652	0.560526	6.88428	15.3005	9.16934e-05	0.00190187																			ENSMUSG00000070867	0.775166
																								ENSMUSG00000025212	-0.512025	4.54622	15.2964	9.18916e-05	0.00190309																			ENSMUSG00000026126	-0.820267
																								ENSMUSG00000017446	-0.387792	4.75148	15.2862	9.239e-05	0.00191051																			ENSMUSG00000051166	1.08817
																								ENSMUSG00000039345	0.34462	4.79125	15.2794	9.27205e-05	0.00191445																			ENSMUSG00000004880	0.731941
																								ENSMUSG00000024687	0.327244	7.22913	15.274	9.29862e-05	0.00191703																			ENSMUSG00000066735	0.501585
																								ENSMUSG00000040086	0.464258	7.16318	15.2672	9.33254e-05	0.00192112																			ENSMUSG00000062713	-0.714291
																								ENSMUSG00000023328	-0.738158	2.42936	15.2632	9.35205e-05	0.00192224																			ENSMUSG00000032939	-0.688106
																								ENSMUSG00000020639	0.556004	1.76514	15.2529	9.40319e-05	0.00192985																			ENSMUSG00000050379	-0.733828
																								ENSMUSG00000021219	-0.62742	4.83387	15.2435	9.45007e-05	0.00193656																			ENSMUSG00000025815	0.707152
																								ENSMUSG00000024883	-0.760775	1.99243	15.2311	9.51235e-05	0.00194639																			ENSMUSG00000035158	-0.60925
																								ENSMUSG00000064080	-0.311353	6.92977	15.2129	9.6043e-05	0.00196227																			ENSMUSG00000110344	-1.51162
																								ENSMUSG00000031673	-0.812743	5.57831	15.1747	9.80072e-05	0.0019994																			ENSMUSG00000058254	-1.01063
																								ENSMUSG00000025176	-0.848788	-0.247041	15.168	9.83574e-05	0.00200165																			ENSMUSG00000056648	-0.746892
																								ENSMUSG00000001687	0.195233	6.31369	15.167	9.84104e-05	0.00200165																			ENSMUSG00000042784	-1.15205
																								ENSMUSG00000020733	-0.887002	4.26396	15.1635	9.85924e-05	0.00200237																			ENSMUSG00000063838	-0.991692
																								ENSMUSG00000029082	-1.13948	5.17742	15.1548	9.90469e-05	0.00200861																			ENSMUSG00000034330	-0.846498
																								ENSMUSG00000001507	-0.421623	4.82515	15.1381	9.99246e-05	0.0020234																			ENSMUSG00000031937	-1.58272
																								ENSMUSG00000026571	0.323016	6.85373	15.1316	0.000100273	0.00202745																			ENSMUSG00000037542	0.514726
																								ENSMUSG00000027333	-0.357162	4.74344	15.1195	0.000100914	0.00203682																			ENSMUSG00000050866	-0.831477
																								ENSMUSG00000031273	-0.75393	3.66437	15.1173	0.000101035	0.00203682																			ENSMUSG00000028750	1.78912
																								ENSMUSG00000015112	0.520854	7.21217	15.1027	0.00010182	0.00204962																			ENSMUSG00000029104	0.780885
																								ENSMUSG00000009145	-0.535241	1.63014	15.0978	0.00010208	0.00205183																			ENSMUSG00000001504	-0.723628
																								ENSMUSG00000075592	-0.533814	4.27009	15.0851	0.000102774	0.00206273																			ENSMUSG00000038775	1.09118
																								ENSMUSG00000001333	0.385689	4.82221	15.0814	0.000102972	0.00206367																			ENSMUSG00000018736	0.569834
																								ENSMUSG00000058690	0.434653	7.62822	15.0705	0.000103569	0.0020726																			ENSMUSG00000028222	-0.931529
																								ENSMUSG00000031661	-0.819785	2.57758	15.0631	0.000103974	0.00207766																			ENSMUSG00000030283	0.77078
																								ENSMUSG00000021794	0.232629	7.42073	15.0602	0.000104138	0.00207788																			ENSMUSG00000024424	1.13167
																								ENSMUSG00000013523	-1.47208	0.0302882	15.0388	0.000105325	0.00209851																			ENSMUSG00000002688	-0.689667
																								ENSMUSG00000032915	-0.557352	1.87302	15.0206	0.000106343	0.00211322																			ENSMUSG00000025937	0.875378
																								ENSMUSG00000040212	-0.503837	4.39152	15.0163	0.000106585	0.00211322																			ENSMUSG00000114212	4.22742
																								ENSMUSG00000039405	-0.754056	5.32246	15.0157	0.00010662	0.00211322																			ENSMUSG00000019817	-0.653069
																								ENSMUSG00000042015	0.32172	5.11542	15.0146	0.000106683	0.00211322																			ENSMUSG00000044117	-2.00966
																								ENSMUSG00000025894	0.269608	5.06393	15.0023	0.00010738	0.00212394																			ENSMUSG00000029291	0.751965
																								ENSMUSG00000000957	-0.359551	5.03173	14.972	0.000109119	0.00215487																			ENSMUSG00000061132	-0.85402
																								ENSMUSG00000044646	-0.711918	2.56646	14.9696	0.000109259	0.00215487																			ENSMUSG00000035495	1.13012
																								ENSMUSG00000020664	0.344654	8.82815	14.9667	0.000109424	0.00215501																			ENSMUSG00000056050	0.530192
																								ENSMUSG00000041771	-0.989974	1.55415	14.9552	0.000110092	0.00216503																			ENSMUSG00000029571	0.55933
																								ENSMUSG00000025647	-0.400875	5.83517	14.9478	0.000110527	0.00217046																			ENSMUSG00000034177	-0.854064
																								ENSMUSG00000032540	0.295391	5.78288	14.933	0.000111396	0.00218274																			ENSMUSG00000039239	-1.84584
																								ENSMUSG00000001348	-0.957888	2.86425	14.9297	0.00011159	0.00218274																			ENSMUSG00000021476	0.600263
																								ENSMUSG00000000168	0.378677	8.45011	14.929	0.000111632	0.00218274																			ENSMUSG00000069324	-2.76763
																								ENSMUSG00000054958	0.542293	4.40641	14.9242	0.000111918	0.0021852																			ENSMUSG00000001120	0.880107
																								ENSMUSG00000027322	-0.932743	3.02952	14.9183	0.000112272	0.00218711																			ENSMUSG00000069255	0.478737
																								ENSMUSG00000032959	0.306685	7.43525	14.9172	0.000112336	0.00218711																			ENSMUSG00000036770	1.7771
																								ENSMUSG00000066456	-0.492664	2.62156	14.9116	0.000112666	0.0021904																			ENSMUSG00000000247	5.32997
																								ENSMUSG00000027805	0.336589	5.11712	14.9033	0.000113167	0.00219701																			ENSMUSG00000052299	0.651473
																								ENSMUSG00000044017	-0.756136	4.58638	14.8997	0.000113382	0.00219806																			ENSMUSG00000000049	4.21168
																								ENSMUSG00000036596	-1.41691	0.276744	14.8965	0.000113572	0.00219862																			ENSMUSG00000031696	0.496082
																								ENSMUSG00000024924	0.459773	8.94654	14.8903	0.000113946	0.0022																			ENSMUSG00000021669	0.516575
																								ENSMUSG00000042254	-0.786819	2.59225	14.89	0.000113965	0.0022																			ENSMUSG00000000402	-0.969946
																								ENSMUSG00000019471	0.258197	7.17385	14.8861	0.0001142	0.00220141																			ENSMUSG00000061718	-0.670383
																								ENSMUSG00000030272	0.232738	6.11137	14.8743	0.000114915	0.00221208																			ENSMUSG00000040296	-0.642573
																								ENSMUSG00000068205	0.561106	2.0871	14.8652	0.000115472	0.00221966																			ENSMUSG00000001507	-0.514943
																								ENSMUSG00000069844	0.30369	4.44832	14.8533	0.000116202	0.00223055																			ENSMUSG00000021418	1.14724
																								ENSMUSG00000032523	0.336296	6.41831	14.8365	0.000117247	0.00224746																			ENSMUSG00000043668	-0.766745
																								ENSMUSG00000049339	-0.236194	4.92174	14.8309	0.00011759	0.00224923																			ENSMUSG00000074622	-0.732872
																								ENSMUSG00000020309	0.369647	4.24067	14.8297	0.000117669	0.00224923																			ENSMUSG00000000216	-0.745202
																								ENSMUSG00000026915	-0.229162	4.51935	14.8173	0.000118443	0.00226085																			ENSMUSG00000041378	-0.879483
																								ENSMUSG00000006390	-0.322835	4.40771	14.8129	0.000118722	0.00226301																			ENSMUSG00000040978	0.753157
																								ENSMUSG00000019210	0.297499	6.89386	14.7982	0.000119647	0.00227556																			ENSMUSG00000015354	-2.28142
																								ENSMUSG00000037788	-0.335826	4.77995	14.7972	0.000119713	0.00227556																			ENSMUSG00000055980	-0.71199
																								ENSMUSG00000029718	-0.435237	6.36542	14.7703	0.000121436	0.00230381																			ENSMUSG00000040472	0.571206
																								ENSMUSG00000014813	-0.659767	1.74422	14.7687	0.000121538	0.00230381																			ENSMUSG00000021335	0.845539
																								ENSMUSG00000031239	-0.56728	4.77607	14.7634	0.000121876	0.00230703																			ENSMUSG00000029335	-0.958214
																								ENSMUSG00000021508	0.90298	4.81964	14.7601	0.000122089	0.00230785																			ENSMUSG00000025418	-0.868679
																								ENSMUSG00000027288	0.445869	10.331	14.7487	0.000122829	0.00231864																			ENSMUSG00000038546	0.442022
																								ENSMUSG00000020734	-1.51386	2.91373	14.7454	0.000123045	0.00231951																			ENSMUSG00000020911	-1.24816
																								ENSMUSG00000051811	-0.8584	1.12861	14.7357	0.000123682	0.0023283																			ENSMUSG00000025194	0.936283
																								ENSMUSG00000015093	-1.15872	1.28514	14.7256	0.000124345	0.00233755																			ENSMUSG00000034127	-0.713096
																								ENSMUSG00000027087	-0.401048	5.41535	14.7127	0.000125201	0.0023504																			ENSMUSG00000038552	-0.977752
																								ENSMUSG00000026979	-0.832567	2.70396	14.6992	0.000126103	0.00236409																			ENSMUSG00000027709	0.701516
																								ENSMUSG00000039197	0.351573	7.46902	14.6963	0.000126295	0.00236416																			ENSMUSG00000033257	0.935845
																								ENSMUSG00000039081	-0.757645	1.43794	14.6939	0.000126453	0.00236416																			ENSMUSG00000033417	0.62721
																								ENSMUSG00000042644	-0.502589	4.82285	14.6875	0.000126886	0.002369																			ENSMUSG00000021371	0.45092
																								ENSMUSG00000027536	0.48798	5.48028	14.669	0.000128136	0.00238638																			ENSMUSG00000032372	0.618267
																								ENSMUSG00000024098	-0.20795	7.09741	14.6686	0.000128167	0.00238638																			ENSMUSG00000031762	-1.36801
																								ENSMUSG00000025161	-0.789728	1.58712	14.6658	0.000128355	0.00238663																			ENSMUSG00000042428	0.756288
																								ENSMUSG00000005683	0.417591	10.337	14.6625	0.000128577	0.00238706																			ENSMUSG00000047638	0.902748
																								ENSMUSG00000027628	0.223121	4.58105	14.6603	0.000128728	0.00238706																			ENSMUSG00000042700	0.672838
																								ENSMUSG00000026618	0.304364	7.14479	14.6287	0.000130903	0.0024209																			ENSMUSG00000020566	-0.689151
																								ENSMUSG00000037541	-1.22017	-0.577738	14.6273	0.000131003	0.0024209																			ENSMUSG00000047557	-1.03514
																								ENSMUSG00000036036	-0.674498	2.67701	14.6254	0.000131138	0.0024209																			ENSMUSG00000018340	-0.82724
																								ENSMUSG00000022244	0.349885	4.99449	14.6236	0.000131262	0.0024209																			ENSMUSG00000022210	0.659724
																								ENSMUSG00000026209	0.282349	5.92646	14.6188	0.000131593	0.00242237																			ENSMUSG00000004364	0.520055
																								ENSMUSG00000001506	-0.460915	7.24614	14.6173	0.000131697	0.00242237																			ENSMUSG00000025059	0.561001
																								ENSMUSG00000030613	0.300965	5.13094	14.6059	0.000132496	0.00243379																			ENSMUSG00000037852	1.86746
																								ENSMUSG00000024759	-0.426386	5.96954	14.5975	0.00013309	0.00244141																			ENSMUSG00000024644	1.7354
																								ENSMUSG00000017309	0.439455	6.02259	14.5923	0.000133461	0.00244221																			ENSMUSG00000020107	0.533472
																								ENSMUSG00000040488	-0.37443	9.04471	14.5918	0.000133491	0.00244221																			ENSMUSG00000029098	1.3161
																								ENSMUSG00000041650	0.313051	6.35821	14.5836	0.000134074	0.00244959																			ENSMUSG00000024386	0.813195
																								ENSMUSG00000052712	0.357888	7.56867	14.5744	0.000134734	0.00245532																			ENSMUSG00000039007	0.863903
																								ENSMUSG00000072966	-0.787501	2.71053	14.5742	0.000134747	0.00245532																			ENSMUSG00000038388	0.969358
																								ENSMUSG00000020253	-0.400344	4.22847	14.5664	0.000135304	0.00246005																			ENSMUSG00000022598	-1.14978
																								ENSMUSG00000025823	-0.464731	5.5162	14.5655	0.000135368	0.00246005																			ENSMUSG00000090523	-1.20574
																								ENSMUSG00000049709	0.292863	5.17481	14.5584	0.000135878	0.00246605																			ENSMUSG00000001583	-0.854606
																								ENSMUSG00000026335	-0.738911	10.8598	14.5417	0.000137092	0.00247928																			ENSMUSG00000039620	-1.0804
																								ENSMUSG00000019124	-0.6253	4.23471	14.5416	0.000137097	0.00247928																			ENSMUSG00000060336	1.83624
																								ENSMUSG00000032878	0.49641	3.45035	14.5409	0.000137153	0.00247928																			ENSMUSG00000035699	1.29286
																								ENSMUSG00000028413	-0.256479	7.00595	14.5311	0.000137868	0.00248891																			ENSMUSG00000045094	-0.852034
																								ENSMUSG00000019787	0.297249	8.27924	14.5152	0.000139034	0.00250665																			ENSMUSG00000022545	0.663672
																								ENSMUSG00000031353	0.254023	7.51297	14.5001	0.00014015	0.00252256																			ENSMUSG00000065954	-0.522834
																								ENSMUSG00000031154	-0.216806	5.42188	14.4983	0.000140286	0.00252256																			ENSMUSG00000037946	-0.697061
																								ENSMUSG00000058173	0.382883	3.39702	14.4956	0.000140488	0.00252286																			ENSMUSG00000039270	-0.622893
																								ENSMUSG00000044734	-0.650549	2.90785	14.4921	0.000140746	0.00252418																			ENSMUSG00000031488	-0.64396
																								ENSMUSG00000026939	0.354118	4.58006	14.4673	0.000142617	0.00254906																			ENSMUSG00000038545	-0.561412
																								ENSMUSG00000026356	0.276589	6.15608	14.4659	0.000142723	0.00254906																			ENSMUSG00000025006	0.768577
																								ENSMUSG00000023938	0.371312	4.80828	14.4646	0.000142817	0.00254906																			ENSMUSG00000022257	-0.689724
																								ENSMUSG00000050248	-0.381029	3.96244	14.4638	0.000142881	0.00254906																			ENSMUSG00000029312	0.674735
																								ENSMUSG00000026672	0.58208	7.1048	14.4587	0.000143264	0.00255082																			ENSMUSG00000042271	0.554195
																								ENSMUSG00000020592	-0.598861	3.59995	14.4564	0.000143442	0.00255082																			ENSMUSG00000022105	-0.452895
																								ENSMUSG00000025013	1.14328	0.0837186	14.4551	0.00014354	0.00255082																			ENSMUSG00000021214	-3.30878
																								ENSMUSG00000090942	1.07209	2.41088	14.4506	0.000143881	0.00255115																			ENSMUSG00000029082	-0.730169
																								ENSMUSG00000045763	-0.612907	1.7972	14.4487	0.000144027	0.00255115																			ENSMUSG00000028555	-1.48577
																								ENSMUSG00000036437	-1.17171	1.42061	14.4475	0.000144119	0.00255115																			ENSMUSG00000028330	0.790208
																								ENSMUSG00000079563	-1.0289	0.318959	14.4423	0.000144516	0.00255141																			ENSMUSG00000029070	-0.509373
																								ENSMUSG00000004789	0.392065	9.15003	14.4394	0.000144739	0.00255141																			ENSMUSG00000021756	0.569244
																								ENSMUSG00000028990	0.310606	5.04318	14.4385	0.000144812	0.00255141																			ENSMUSG00000003865	-0.602988
																								ENSMUSG00000068742	0.321248	5.09314	14.4376	0.000144882	0.00255141																			ENSMUSG00000041658	-1.08893
																								ENSMUSG00000026407	0.783784	3.83902	14.4345	0.000145117	0.00255227																			ENSMUSG00000026688	-1.01389
																								ENSMUSG00000037126	-1.06851	0.102665	14.4236	0.000145963	0.00256384																			ENSMUSG00000026393	0.644403
																								ENSMUSG00000001525	-0.304776	6.98742	14.4123	0.000146843	0.00257598																			ENSMUSG00000032540	0.470962
																								ENSMUSG00000014592	0.355192	6.90416	14.405	0.000147411	0.00258262																			ENSMUSG00000061742	1.12925
																								ENSMUSG00000022216	0.338308	7.19239	14.3834	0.000149108	0.00260796																			ENSMUSG00000038782	-0.667522
																								ENSMUSG00000048351	0.328783	4.37955	14.3818	0.000149239	0.00260796																			ENSMUSG00000038859	-0.488802
																								ENSMUSG00000035189	0.43139	3.7839	14.3754	0.000149749	0.00261353																			ENSMUSG00000021751	-0.960103
																								ENSMUSG00000035372	-0.338565	3.45498	14.3673	0.000150393	0.00262142																			ENSMUSG00000033059	-0.679996
																								ENSMUSG00000003123	-0.443411	5.74736	14.3537	0.000151484	0.00263705																			ENSMUSG00000079445	-0.97327
																								ENSMUSG00000025607	0.266349	5.52989	14.3428	0.000152364	0.002649																			ENSMUSG00000078670	-0.76438
																								ENSMUSG00000022114	-0.304466	4.11687	14.3401	0.000152577	0.00264933																			ENSMUSG00000020859	0.676784
																								ENSMUSG00000021646	0.312447	5.88381	14.3235	0.000153933	0.00266947																			ENSMUSG00000026664	0.817748
																								ENSMUSG00000036459	-0.419441	3.61225	14.3086	0.000155158	0.00268637																			ENSMUSG00000007107	2.28808
																								ENSMUSG00000020402	0.329738	9.86453	14.3047	0.000155478	0.00268637																			ENSMUSG00000075000	0.580552
																								ENSMUSG00000032702	-0.404199	6.84402	14.3044	0.000155498	0.00268637																			ENSMUSG00000017724	-1.74634
																								ENSMUSG00000021236	0.379182	7.58825	14.3002	0.000155848	0.00268881																			ENSMUSG00000022265	-0.798609
																								ENSMUSG00000044551	-0.812316	0.599229	14.298	0.000156033	0.00268881																			ENSMUSG00000039703	0.531061
																								ENSMUSG00000066842	-0.451196	6.67549	14.2951	0.000156274	0.00268958																			ENSMUSG00000008601	-0.75561
																								ENSMUSG00000078485	-0.5515	2.22053	14.2861	0.000157016	0.00269894																			ENSMUSG00000021832	0.396153
																								ENSMUSG00000030064	-0.533296	5.02747	14.2725	0.000158157	0.00271513																			ENSMUSG00000048787	0.603272
																								ENSMUSG00000005505	0.285904	4.42266	14.2694	0.000158418	0.00271619																			ENSMUSG00000026675	0.749453
																								ENSMUSG00000001482	0.412704	6.02679	14.262	0.000159045	0.00272352																			ENSMUSG00000037573	0.628994
																								ENSMUSG00000058743	1.41417	1.13585	14.2596	0.000159245	0.00272353																			ENSMUSG00000041607	-0.627906
																								ENSMUSG00000027446	-1.15809	-0.269312	14.2544	0.000159684	0.00272762																			ENSMUSG00000024043	-0.70801
																								ENSMUSG00000040859	0.223056	5.6556	14.2437	0.000160598	0.00273981																			ENSMUSG00000066438	-0.882946
																								ENSMUSG00000036510	-1.04219	-0.30569	14.2406	0.000160866	0.00274095																			ENSMUSG00000029131	0.443105
																								ENSMUSG00000034424	0.291645	5.0364	14.2342	0.000161414	0.00274685																			ENSMUSG00000002274	-1.19941
																								ENSMUSG00000003923	0.211952	5.68671	14.2164	0.000162941	0.00276837																			ENSMUSG00000046010	0.599173
																								ENSMUSG00000029474	0.22828	5.12042	14.2133	0.000163216	0.00276837																			ENSMUSG00000002797	1.01798
																								ENSMUSG00000027792	0.395994	6.21556	14.2118	0.000163341	0.00276837																			ENSMUSG00000026603	-0.874563
																								ENSMUSG00000006299	0.1949	6.74224	14.2065	0.000163807	0.00276837																			ENSMUSG00000035547	-0.678967
																								ENSMUSG00000067780	-0.665887	3.96787	14.2061	0.000163835	0.00276837																			ENSMUSG00000040998	-0.91154
																								ENSMUSG00000025885	0.281848	5.8381	14.2054	0.000163895	0.00276837																			ENSMUSG00000051359	-1.0496
																								ENSMUSG00000026342	0.512988	6.72299	14.2031	0.000164102	0.00276844																			ENSMUSG00000090817	-1.20772
																								ENSMUSG00000030340	-0.712752	1.11342	14.1971	0.000164623	0.00277379																			ENSMUSG00000020698	1.18529
																								ENSMUSG00000022257	-0.243783	6.12816	14.1912	0.000165145	0.00277916																			ENSMUSG00000074165	-0.852577
																								ENSMUSG00000036856	-0.780096	0.79822	14.1771	0.000166384	0.00279656																			ENSMUSG00000005973	-0.586719
																								ENSMUSG00000024534	-0.430179	3.5557	14.1692	0.000167087	0.00280493																			ENSMUSG00000032328	0.448876
																								ENSMUSG00000051159	-0.855475	-0.29211	14.1663	0.000167338	0.00280549																			ENSMUSG00000011034	-1.03875
																								ENSMUSG00000027367	0.307672	7.84147	14.1642	0.000167532	0.00280549																			ENSMUSG00000090124	2.86565
																								ENSMUSG00000034936	-0.455581	4.75985	14.1552	0.000168329	0.00281538																			ENSMUSG00000031765	-1.21515
																								ENSMUSG00000003809	0.279518	5.92668	14.1481	0.00016897	0.00281703																			ENSMUSG00000020836	1.30318
																								ENSMUSG00000027984	0.438558	9.15795	14.1475	0.00016902	0.00281703																			ENSMUSG00000045034	1.46569
																								ENSMUSG00000074743	-0.384963	6.66518	14.1472	0.000169047	0.00281703																			ENSMUSG00000024500	-0.872682
																								ENSMUSG00000016494	-0.320433	7.53019	14.1432	0.000169407	0.00281763																			ENSMUSG00000029868	-1.4564
																								ENSMUSG00000007682	-0.973886	1.40854	14.1414	0.000169569	0.00281763																			ENSMUSG00000032192	-0.742534
																								ENSMUSG00000053838	0.258791	6.9885	14.1379	0.000169889	0.00281763																			ENSMUSG00000053870	0.558036
																								ENSMUSG00000002578	-0.641673	1.21074	14.1377	0.000169908	0.00281763																			ENSMUSG00000008734	-0.609316
																								ENSMUSG00000024471	1.00253	5.37579	14.1329	0.00017034	0.00282136																			ENSMUSG00000000441	0.420256
																								ENSMUSG00000038179	-1.23457	-0.373826	14.1213	0.000171395	0.00283539																			ENSMUSG00000038781	-0.727811
																								ENSMUSG00000031969	0.289847	5.64802	14.0962	0.000173699	0.00287002																			ENSMUSG00000048826	-0.684751
																								ENSMUSG00000026930	0.358655	7.35631	14.0909	0.000174184	0.00287351																			ENSMUSG00000042660	0.597165
																								ENSMUSG00000052337	0.372193	9.03947	14.0868	0.000174564	0.00287351																			ENSMUSG00000028124	0.45785
																								ENSMUSG00000026750	0.339729	6.9802	14.0867	0.000174576	0.00287351																			ENSMUSG00000041440	1.01727
																								ENSMUSG00000032383	-0.256837	6.4034	14.0848	0.000174752	0.00287351																			ENSMUSG00000021125	-1.64961
																								ENSMUSG00000031595	-0.848345	1.79186	14.0752	0.000175645	0.00288472																			ENSMUSG00000029822	0.720122
																								ENSMUSG00000030881	-0.260335	4.55791	14.0715	0.000175988	0.00288688																			ENSMUSG00000034863	-0.701578
																								ENSMUSG00000048332	-0.284902	6.61908	14.067	0.000176413	0.00289038																			ENSMUSG00000021785	0.392082
																								ENSMUSG00000008226	0.283304	5.1797	14.0582	0.000177242	0.00290048																			ENSMUSG00000004865	0.479119
																								ENSMUSG00000020911	-1.05876	4.32611	14.0459	0.000178398	0.0029159																			ENSMUSG00000023994	0.851449
																								ENSMUSG00000026238	-0.297314	7.51968	14.0176	0.000181103	0.00295657																			ENSMUSG00000035936	0.495453
																								ENSMUSG00000035637	0.339908	4.51265	13.9896	0.000183828	0.00299588																			ENSMUSG00000022292	0.63793
																								ENSMUSG00000040652	0.246198	7.05598	13.9867	0.000184109	0.00299588																			ENSMUSG00000110949	1.03927
																								ENSMUSG00000024197	0.549522	7.1902	13.9861	0.00018417	0.00299588																			ENSMUSG00000024940	-0.580132
																								ENSMUSG00000061068	-1.05784	0.736022	13.9806	0.000184709	0.00300079																			ENSMUSG00000022636	1.05668
																								ENSMUSG00000020671	0.211267	7.20417	13.9785	0.000184911	0.00300079																			ENSMUSG00000057074	3.47149
																								ENSMUSG00000027360	-0.819213	2.14168	13.9549	0.000187253	0.003032																			ENSMUSG00000003955	-0.551771
																								ENSMUSG00000024668	0.271318	5.73427	13.9546	0.000187278	0.003032																			ENSMUSG00000020866	-1.16139
																								ENSMUSG00000022898	0.195528	5.16291	13.9522	0.000187517	0.00303227																			ENSMUSG00000056671	-1.10177
																								ENSMUSG00000034780	-0.713335	1.44576	13.9425	0.000188487	0.00304434																			ENSMUSG00000028949	-0.679235
																								ENSMUSG00000025747	-0.549379	1.48275	13.9295	0.000189795	0.00306185																			ENSMUSG00000030994	-2.16278
																								ENSMUSG00000024659	-0.615559	5.45029	13.9256	0.000190192	0.00306463																			ENSMUSG00000030323	0.55385
																								ENSMUSG00000038807	0.42796	7.47552	13.9017	0.00019262	0.00310009																			ENSMUSG00000068876	-0.55428
																								ENSMUSG00000030067	-0.437404	5.16508	13.8845	0.000194399	0.00312503																			ENSMUSG00000034917	-0.944646
																								ENSMUSG00000039646	-0.613389	4.16883	13.8787	0.000194991	0.00313087																			ENSMUSG00000001376	0.398468
																								ENSMUSG00000025140	-0.793801	0.705125	13.8668	0.000196231	0.00314579																			ENSMUSG00000045639	-0.597813
																								ENSMUSG00000023046	-0.928155	5.52255	13.8654	0.000196381	0.00314579																			ENSMUSG00000052331	0.780658
																								ENSMUSG00000050382	-0.50677	2.46449	13.8611	0.000196827	0.00314832																			ENSMUSG00000089960	-2.02544
																								ENSMUSG00000017286	0.252611	5.08787	13.8595	0.000197001	0.00314832																			ENSMUSG00000029650	1.21533
																								ENSMUSG00000029832	-1.24982	-0.13816	13.8558	0.00019739	0.00315086																			ENSMUSG00000037408	-0.963421
																								ENSMUSG00000032609	-0.29899	4.2826	13.849	0.000198101	0.00315851																			ENSMUSG00000021051	0.508588
																								ENSMUSG00000058997	0.527541	7.862	13.8363	0.000199448	0.00317627																			ENSMUSG00000002032	1.02518
																								ENSMUSG00000024782	0.335168	7.0609	13.8308	0.000200032	0.00317667																			ENSMUSG00000037062	0.376582
																								ENSMUSG00000038506	0.325702	6.46156	13.8296	0.000200155	0.00317667																			ENSMUSG00000021737	0.450629
																								ENSMUSG00000074649	0.261853	5.47123	13.8274	0.000200397	0.00317667																			ENSMUSG00000028583	-1.06175
																								ENSMUSG00000044550	-1.11612	-0.114672	13.8273	0.000200404	0.00317667																			ENSMUSG00000073987	-0.652151
																								ENSMUSG00000044499	0.519525	2.40638	13.8126	0.000201974	0.00319434																			ENSMUSG00000035561	-1.61999
																								ENSMUSG00000028140	0.290073	6.10533	13.8123	0.000202009	0.00319434																			ENSMUSG00000031827	-1.26669
																								ENSMUSG00000028849	0.269274	8.27897	13.8103	0.000202221	0.00319434																			ENSMUSG00000029500	0.517175
																								ENSMUSG00000030869	0.302174	8.75505	13.8053	0.000202759	0.00319718																			ENSMUSG00000030268	-1.9602
																								ENSMUSG00000008153	-2.27271	0.967467	13.8043	0.000202869	0.00319718																			ENSMUSG00000022533	0.627343
																								ENSMUSG00000025534	-0.263439	4.50638	13.8013	0.000203197	0.00319865																			ENSMUSG00000034342	0.859727
																								ENSMUSG00000046714	-0.741966	1.89017	13.7982	0.000203527	0.00320016																			ENSMUSG00000038485	0.673726
																								ENSMUSG00000027305	0.353499	5.06223	13.781	0.000205405	0.00322597																			ENSMUSG00000049775	-0.472751
																								ENSMUSG00000067586	0.48554	5.7818	13.777	0.000205839	0.00322907																			ENSMUSG00000041439	-0.546551
																								ENSMUSG00000026260	0.371435	8.89449	13.7746	0.000206103	0.00322951																			ENSMUSG00000078652	0.441001
																								ENSMUSG00000039899	-0.843932	6.55394	13.7718	0.000206414	0.00323066																			ENSMUSG00000018501	0.577686
																								ENSMUSG00000025903	0.287577	5.79714	13.7599	0.000207721	0.00324681																			ENSMUSG00000028894	0.801484
																								ENSMUSG00000022111	0.317389	4.45636	13.7581	0.000207922	0.00324681																			ENSMUSG00000032578	-1.86408
																								ENSMUSG00000053581	0.190411	4.77606	13.7518	0.000208625	0.00325407																			ENSMUSG00000075012	1.26337
																								ENSMUSG00000037060	-0.325877	4.55906	13.739	0.000210051	0.00327258																			ENSMUSG00000024197	-0.83313
																								ENSMUSG00000022800	0.2307	6.59149	13.7339	0.000210618	0.00327767																			ENSMUSG00000030160	-0.721058
																								ENSMUSG00000021868	0.364707	7.59599	13.7196	0.000212233	0.00329903																			ENSMUSG00000028078	-2.19999
																								ENSMUSG00000015217	0.299969	5.34253	13.7078	0.000213568	0.00331601																			ENSMUSG00000079104	0.556624
																								ENSMUSG00000032314	0.343153	9.21403	13.6994	0.000214524	0.00332707																			ENSMUSG00000044393	-0.883192
																								ENSMUSG00000024673	-1.14157	2.74485	13.694	0.000215143	0.00333165																			ENSMUSG00000027510	1.32009
																								ENSMUSG00000033207	-0.626658	2.43269	13.6925	0.000215307	0.00333165																			ENSMUSG00000003038	0.595504
																								ENSMUSG00000026643	-0.235806	4.55365	13.688	0.000215833	0.00333318																			ENSMUSG00000020677	0.690375
																								ENSMUSG00000024099	0.33328	8.47657	13.6874	0.000215895	0.00333318																			ENSMUSG00000021870	0.407669
																								ENSMUSG00000038615	0.301874	9.06397	13.6739	0.000217459	0.00335354																			ENSMUSG00000021079	0.653791
																								ENSMUSG00000007041	-0.387787	5.64439	13.665	0.000218489	0.00336561																			ENSMUSG00000024208	-0.69029
																								ENSMUSG00000038121	0.395009	7.93819	13.6591	0.000219174	0.00337237																			ENSMUSG00000030681	-0.528329
																								ENSMUSG00000024231	0.236188	5.59428	13.6515	0.000220067	0.00338229																			ENSMUSG00000029017	0.554646
																								ENSMUSG00000072235	-0.293969	5.80447	13.6452	0.000220808	0.00338986																			ENSMUSG00000020646	-0.639902
																								ENSMUSG00000028226	-0.642096	0.831611	13.6262	0.000223047	0.0034166																			ENSMUSG00000032009	-0.481057
																								ENSMUSG00000025789	-1.11012	0.61966	13.624	0.000223311	0.0034166																			ENSMUSG00000032403	0.614473
																								ENSMUSG00000031974	0.406641	6.15437	13.6183	0.000223995	0.0034166																			ENSMUSG00000034158	0.819821
																								ENSMUSG00000038583	0.356025	12.6224	13.6173	0.000224115	0.0034166																			ENSMUSG00000022747	-0.53261
																								ENSMUSG00000011148	0.451727	7.34426	13.6152	0.000224362	0.0034166																			ENSMUSG00000023259	-0.797692
																								ENSMUSG00000035551	-1.21161	1.40921	13.6145	0.000224446	0.0034166																			ENSMUSG00000029780	0.526653
																								ENSMUSG00000042476	0.57488	5.19268	13.6129	0.000224642	0.0034166																			ENSMUSG00000019861	0.458522
																								ENSMUSG00000001918	-0.680467	4.67784	13.6128	0.000224643	0.0034166																			ENSMUSG00000056162	1.69033
																								ENSMUSG00000043683	0.440773	7.9433	13.6115	0.000224803	0.0034166																			ENSMUSG00000025980	0.706681
																								ENSMUSG00000037904	0.5502	4.99035	13.6005	0.000226128	0.0034308																			ENSMUSG00000068130	1.31119
																								ENSMUSG00000039100	0.25574	7.50819	13.5967	0.000226585	0.0034308																			ENSMUSG00000000340	0.38082
																								ENSMUSG00000030872	0.259071	6.33842	13.5947	0.000226826	0.0034308																			ENSMUSG00000000690	-0.626612
																								ENSMUSG00000034796	1.36755	1.11806	13.5941	0.000226896	0.0034308																			ENSMUSG00000000915	-0.462857
																								ENSMUSG00000024479	-1.17089	1.14986	13.5933	0.000226994	0.0034308																			ENSMUSG00000046959	0.710059
																								ENSMUSG00000051391	0.34027	7.76017	13.5799	0.000228625	0.00345164																			ENSMUSG00000031570	-0.811527
																								ENSMUSG00000000708	0.237154	7.03094	13.5714	0.000229655	0.00345578																			ENSMUSG00000054434	0.76917
																								ENSMUSG00000048755	0.350794	4.89037	13.5711	0.000229694	0.00345578																			ENSMUSG00000037606	-0.593958
																								ENSMUSG00000049436	-1.13428	4.10235	13.5703	0.000229794	0.00345578																			ENSMUSG00000071267	0.604118
																								ENSMUSG00000027236	0.280117	4.87812	13.5693	0.000229912	0.00345578																			ENSMUSG00000032098	1.01089
																								ENSMUSG00000053897	-0.987016	4.74079	13.566	0.00023032	0.0034581																			ENSMUSG00000044819	-0.716957
																								ENSMUSG00000046761	-0.590963	1.23172	13.5584	0.00023125	0.00346825																			ENSMUSG00000006494	-0.938052
																								ENSMUSG00000005611	-0.656903	5.08416	13.5539	0.000231808	0.00347279																			ENSMUSG00000114694	2.53423
																								ENSMUSG00000074064	0.373417	6.53731	13.5431	0.000233141	0.00348893																			ENSMUSG00000022123	-0.742361
																								ENSMUSG00000036103	-0.411672	6.1217	13.5409	0.000233417	0.00348924																			ENSMUSG00000039100	0.551271
																								ENSMUSG00000002997	-1.40841	3.8951	13.5372	0.000233883	0.00349238																			ENSMUSG00000032265	1.26053
																								ENSMUSG00000023908	-0.597575	0.959941	13.5235	0.000235592	0.00351406																			ENSMUSG00000021116	0.397653
																								ENSMUSG00000027108	0.25775	5.427	13.4984	0.000238762	0.00355745																			ENSMUSG00000023959	0.689887
																								ENSMUSG00000003038	0.338143	4.74906	13.487	0.000240219	0.00357525																			ENSMUSG00000034685	-0.889397
																								ENSMUSG00000036087	0.274847	7.55886	13.4848	0.000240507	0.00357564																			ENSMUSG00000050017	0.425047
																								ENSMUSG00000028871	-0.886184	3.81171	13.4704	0.000242362	0.0035993																			ENSMUSG00000029381	-0.54599
																								ENSMUSG00000038486	-0.727555	3.51881	13.4671	0.000242778	0.00360156																			ENSMUSG00000032030	0.463517
																								ENSMUSG00000052609	-0.368082	4.76138	13.4564	0.000244171	0.0036183																			ENSMUSG00000049313	-0.627813
																								ENSMUSG00000021950	-1.04586	2.07026	13.4467	0.000245441	0.00363316																			ENSMUSG00000029735	0.669699
																								ENSMUSG00000033751	0.306478	4.77706	13.4385	0.000246515	0.00364511																			ENSMUSG00000034456	-2.04895
																								ENSMUSG00000034007	0.226576	4.75175	13.4344	0.000247047	0.00364902																			ENSMUSG00000008206	-0.642364
																								ENSMUSG00000046020	-0.214919	5.35083	13.4287	0.000247801	0.0036562																			ENSMUSG00000038776	-0.679552
																								ENSMUSG00000006219	0.391035	7.77253	13.4156	0.000249546	0.00367798																			ENSMUSG00000022994	-0.610841
																								ENSMUSG00000079111	-0.275807	5.44553	13.4049	0.000250962	0.00369066																			ENSMUSG00000021646	-0.564917
																								ENSMUSG00000026536	0.655782	1.3561	13.4033	0.000251181	0.00369066																			ENSMUSG00000025326	0.446601
																								ENSMUSG00000024346	0.237044	5.84324	13.403	0.000251218	0.00369066																			ENSMUSG00000030747	0.452339
																								ENSMUSG00000010110	-0.203961	5.44387	13.3971	0.000252014	0.00369782																			ENSMUSG00000024642	-0.825987
																								ENSMUSG00000037443	0.520295	5.62109	13.3951	0.000252278	0.00369782																			ENSMUSG00000021067	0.548497
																								ENSMUSG00000074698	0.222395	7.13191	13.3933	0.000252518	0.00369782																			ENSMUSG00000042444	0.521432
																								ENSMUSG00000053819	0.279002	7.72074	13.3824	0.000253998	0.0037155																			ENSMUSG00000006154	-0.794116
																								ENSMUSG00000047420	-1.04782	0.677813	13.3507	0.000258324	0.00377474																			ENSMUSG00000037972	0.49002
																								ENSMUSG00000021361	0.268561	6.22259	13.3465	0.000258912	0.00377928																			ENSMUSG00000040209	-0.739804
																								ENSMUSG00000064351	0.389554	15.67	13.3418	0.000259555	0.00378462																			ENSMUSG00000037148	0.497775
																								ENSMUSG00000020720	0.246672	6.47416	13.3325	0.000260842	0.00379724																			ENSMUSG00000024411	-0.99946
																								ENSMUSG00000000171	0.322786	8.82028	13.3316	0.000260977	0.00379724																			ENSMUSG00000040703	-0.922954
																								ENSMUSG00000026347	-1.2845	4.25532	13.3122	0.000263685	0.00383256																			ENSMUSG00000035314	-0.884551
																								ENSMUSG00000028910	0.280408	4.52483	13.3077	0.000264321	0.00383772																			ENSMUSG00000028145	0.90087
																								ENSMUSG00000005161	0.226799	8.4101	13.282	0.000267965	0.00388649																			ENSMUSG00000035392	0.510475
																								ENSMUSG00000021666	0.366701	6.13142	13.2767	0.000268726	0.00389339																			ENSMUSG00000025317	-1.34439
																								ENSMUSG00000032058	-0.403419	3.82307	13.2735	0.000269188	0.00389594																			ENSMUSG00000014907	0.543416
																								ENSMUSG00000029166	0.246947	5.19317	13.2683	0.000269932	0.00390257																			ENSMUSG00000054662	-0.882077
																								ENSMUSG00000035112	-0.390524	3.46032	13.2564	0.000271647	0.00392322																			ENSMUSG00000028760	0.529132
																								ENSMUSG00000020186	-0.504237	4.94148	13.2443	0.000273403	0.0039444																			ENSMUSG00000020961	-0.974929
																								ENSMUSG00000020794	0.311539	6.20638	13.2385	0.000274252	0.00394885																			ENSMUSG00000021003	0.559628
																								ENSMUSG00000027978	-1.1148	2.83043	13.2383	0.00027429	0.00394885																			ENSMUSG00000039395	-1.01273
																								ENSMUSG00000091898	0.403331	11.0613	13.2308	0.000275389	0.00395989																			ENSMUSG00000037316	-0.412097
																								ENSMUSG00000032116	-0.230829	5.75299	13.2291	0.000275637	0.00395989																			ENSMUSG00000042757	1.502
																								ENSMUSG00000019539	-0.506781	5.55472	13.2203	0.00027693	0.00397327																			ENSMUSG00000028979	1.56866
																								ENSMUSG00000025813	0.582902	6.52789	13.2188	0.000277151	0.00397327																			ENSMUSG00000042605	0.554307
																								ENSMUSG00000013701	0.308764	6.75634	13.2104	0.0002784	0.00398699																			ENSMUSG00000039405	-0.546543
																								ENSMUSG00000001082	-0.337228	3.25591	13.2029	0.000279523	0.00399627																			ENSMUSG00000028243	0.467219
																								ENSMUSG00000021396	-0.877822	-0.0451335	13.2007	0.000279848	0.00399627																			ENSMUSG00000047881	-0.629829
																								ENSMUSG00000022440	0.741967	4.1331	13.2002	0.000279926	0.00399627																			ENSMUSG00000020564	0.565917
																								ENSMUSG00000026443	-0.427558	3.50531	13.1948	0.000280729	0.00400355																			ENSMUSG00000030342	-0.742418
																								ENSMUSG00000044502	0.26982	6.25423	13.1903	0.000281398	0.00400889																			ENSMUSG00000048997	0.887424
																								ENSMUSG00000031112	-0.998122	3.90778	13.184	0.000282343	0.00401816																			ENSMUSG00000026678	-0.792792
																								ENSMUSG00000027833	-1.02796	1.09525	13.1751	0.000283688	0.0040331																			ENSMUSG00000042216	-0.835296
																								ENSMUSG00000013936	0.457819	12.953	13.1712	0.000284288	0.00403742																			ENSMUSG00000038843	0.755988
																								ENSMUSG00000062580	0.268322	6.80139	13.156	0.000286604	0.0040652																			ENSMUSG00000015093	-0.991744
																								ENSMUSG00000037362	-0.691537	3.56347	13.1544	0.000286839	0.0040652																			ENSMUSG00000064262	-1.11608
																								ENSMUSG00000075706	0.285038	8.55518	13.1414	0.000288849	0.00408944																			ENSMUSG00000021149	0.690233
																								ENSMUSG00000030774	-0.613677	1.29144	13.1364	0.00028962	0.00409609																			ENSMUSG00000040850	0.481897
																								ENSMUSG00000021175	-0.916365	0.51636	13.1254	0.000291325	0.00411232																			ENSMUSG00000039577	-0.902199
																								ENSMUSG00000050856	0.247849	8.65008	13.1251	0.00029137	0.00411232																			ENSMUSG00000019088	-0.680796
																								ENSMUSG00000010797	-0.960995	1.98589	13.119	0.000292317	0.00412054																			ENSMUSG00000052566	0.484028
																								ENSMUSG00000072568	-0.519276	4.85419	13.1175	0.000292556	0.00412054																			ENSMUSG00000047822	-1.87157
																								ENSMUSG00000005087	-0.590612	4.61294	13.1101	0.000293715	0.00413261																			ENSMUSG00000038390	-0.93545
																								ENSMUSG00000032034	-0.447797	7.72977	13.1068	0.000294228	0.0041348																			ENSMUSG00000042694	-0.715388
																								ENSMUSG00000070802	-0.284143	3.86283	13.1052	0.000294478	0.0041348																			ENSMUSG00000048988	-0.882607
																								ENSMUSG00000060675	0.253788	7.19046	13.0981	0.000295603	0.00414434																			ENSMUSG00000001249	0.424326
																								ENSMUSG00000053441	-0.592613	3.34934	13.097	0.000295764	0.00414434																			ENSMUSG00000020027	-1.82656
																								ENSMUSG00000051373	0.406792	4.90843	13.0947	0.000296137	0.00414532																			ENSMUSG00000022811	0.378856
																								ENSMUSG00000031377	-0.916214	3.50677	13.0786	0.000298694	0.00417682																			ENSMUSG00000043079	-0.614132
																								ENSMUSG00000009681	-0.46892	4.75228	13.0756	0.000299167	0.00417915																			ENSMUSG00000073639	0.436021
																								ENSMUSG00000004069	0.352658	7.11427	13.0711	0.000299893	0.00418502																			ENSMUSG00000053907	0.827919
																								ENSMUSG00000028364	-0.819757	0.508797	13.0552	0.000302438	0.00421622																			ENSMUSG00000043629	-2.42942
																								ENSMUSG00000063531	-0.76406	1.15689	13.0441	0.000304233	0.00423691																			ENSMUSG00000063931	0.573667
																								ENSMUSG00000083649	0.518068	1.89529	13.0387	0.000305114	0.00424485																			ENSMUSG00000068205	2.61957
																								ENSMUSG00000038879	-0.857741	0.414088	13.0269	0.000307046	0.00426737																			ENSMUSG00000007610	-0.529186
																								ENSMUSG00000043671	-0.642155	2.57426	13.0145	0.000309081	0.00428761																			ENSMUSG00000031465	-0.756376
																								ENSMUSG00000030088	-0.613401	2.25269	13.0142	0.00030913	0.00428761																			ENSMUSG00000025224	0.544214
																								ENSMUSG00000078716	0.326499	5.30012	13.0091	0.000309975	0.00429496																			ENSMUSG00000047496	0.576653
																								ENSMUSG00000037410	-0.348023	5.09504	12.9986	0.000311719	0.00431475																			ENSMUSG00000027957	0.841701
																								ENSMUSG00000020684	0.599222	6.29914	12.9747	0.00031573	0.00436584																			ENSMUSG00000030946	-1.0841
																								ENSMUSG00000017009	-0.388868	5.19249	12.9564	0.000318834	0.0044043																			ENSMUSG00000027215	-0.760552
																								ENSMUSG00000018263	-0.717381	5.88453	12.9505	0.000319831	0.0044136																			ENSMUSG00000025037	-1.2641
																								ENSMUSG00000034993	-0.344321	5.51236	12.9486	0.000320169	0.0044138																			ENSMUSG00000006574	-0.982462
																								ENSMUSG00000026003	0.352769	10.0507	12.9448	0.000320814	0.00441823																			ENSMUSG00000032409	0.488683
																								ENSMUSG00000016257	0.23085	5.8859	12.9421	0.000321272	0.00442009																			ENSMUSG00000061950	0.389214
																								ENSMUSG00000037379	-0.755363	4.71979	12.9357	0.000322383	0.00442882																			ENSMUSG00000031628	-0.467558
																								ENSMUSG00000025597	-0.49487	3.79036	12.9346	0.000322556	0.00442882																			ENSMUSG00000030095	-0.427964
																								ENSMUSG00000029185	-0.555219	5.15145	12.9274	0.000323803	0.00444081																			ENSMUSG00000052595	0.938637
																								ENSMUSG00000020483	0.328898	9.06966	12.9258	0.000324081	0.00444081																			ENSMUSG00000045319	-1.06589
																								ENSMUSG00000022885	-0.509791	4.4371	12.9211	0.000324895	0.00444751																			ENSMUSG00000037490	-0.692746
																								ENSMUSG00000025486	0.369363	5.43004	12.916	0.00032578	0.00445468																			ENSMUSG00000040693	2.47937
																								ENSMUSG00000017002	-1.46243	2.13948	12.9144	0.000326072	0.00445468																			ENSMUSG00000041777	0.621242
																								ENSMUSG00000044548	-0.744405	3.39204	12.9008	0.00032845	0.00448187																			ENSMUSG00000029922	0.568624
																								ENSMUSG00000036667	-0.465996	5.59713	12.8992	0.000328719	0.00448187																			ENSMUSG00000043811	-0.951205
																								ENSMUSG00000020654	-0.396874	3.03019	12.8945	0.000329548	0.0044887																			ENSMUSG00000030766	0.505294
																								ENSMUSG00000018446	0.334014	6.55721	12.8874	0.00033081	0.00450139																			ENSMUSG00000050368	-0.683
																								ENSMUSG00000046223	-0.462869	2.05692	12.884	0.000331401	0.00450494																			ENSMUSG00000020709	0.710695
																								ENSMUSG00000001930	-0.802676	8.23199	12.8746	0.000333074	0.00451581																			ENSMUSG00000027495	-0.619429
																								ENSMUSG00000039763	0.395665	5.67057	12.8741	0.000333166	0.00451581																			ENSMUSG00000076435	-1.20729
																								ENSMUSG00000003721	0.196943	5.96274	12.8739	0.000333193	0.00451581																			ENSMUSG00000055240	0.868042
																								ENSMUSG00000038550	0.90789	1.06615	12.8689	0.00033408	0.00452333																			ENSMUSG00000040661	0.876957
																								ENSMUSG00000031147	0.558566	4.52474	12.846	0.000338195	0.00456991																			ENSMUSG00000042831	-0.76551
																								ENSMUSG00000055128	0.228181	4.09189	12.8456	0.000338278	0.00456991																			ENSMUSG00000024231	0.452448
																								ENSMUSG00000042215	0.311409	5.01045	12.8431	0.000338719	0.00456991																			ENSMUSG00000020668	-0.588724
																								ENSMUSG00000030247	0.339875	4.95927	12.8424	0.000338859	0.00456991																			ENSMUSG00000032386	0.416397
																								ENSMUSG00000024810	-0.73707	4.16082	12.8393	0.000339419	0.00457294																			ENSMUSG00000027533	-0.880792
																								ENSMUSG00000052957	-0.570228	6.2216	12.8247	0.000342078	0.00460038																			ENSMUSG00000025403	0.761923
																								ENSMUSG00000020656	-0.649844	1.10847	12.8244	0.00034213	0.00460038																			ENSMUSG00000020875	-0.792154
																								ENSMUSG00000034845	-0.814515	6.43495	12.8162	0.000343637	0.0046161																			ENSMUSG00000027359	0.543677
																								ENSMUSG00000063558	0.42427	6.99404	12.8138	0.000344067	0.00461734																			ENSMUSG00000026778	-0.770125
																								ENSMUSG00000025208	0.271942	5.08978	12.8111	0.000344562	0.00461944																			ENSMUSG00000049493	-0.576095
																								ENSMUSG00000031075	-0.548985	4.76397	12.8069	0.00034535	0.00462365																			ENSMUSG00000039976	-0.756163
																								ENSMUSG00000030717	-0.57183	3.08876	12.8058	0.000345554	0.00462365																			ENSMUSG00000036257	0.435393
																								ENSMUSG00000030224	0.222637	6.67884	12.8018	0.000346293	0.00462899																			ENSMUSG00000038816	-0.532139
																								ENSMUSG00000026784	0.347828	4.07278	12.7852	0.000349365	0.00466549																			ENSMUSG00000020635	2.09198
																								ENSMUSG00000033022	-1.56146	4.58955	12.7832	0.000349754	0.00466613																			ENSMUSG00000044313	-1.20523
																								ENSMUSG00000026158	0.286641	4.80104	12.7808	0.000350201	0.00466752																			ENSMUSG00000029173	0.43505
																								ENSMUSG00000043384	-0.284506	5.97772	12.7603	0.000354058	0.0047082																			ENSMUSG00000021850	-1.11309
																								ENSMUSG00000028463	-1.27305	-0.600443	12.7598	0.000354153	0.0047082																			ENSMUSG00000021123	-2.18622
																								ENSMUSG00000035268	0.269816	7.21745	12.7591	0.000354288	0.0047082																			ENSMUSG00000070939	0.54002
																								ENSMUSG00000004748	0.487831	6.76211	12.7478	0.000356429	0.00473204																			ENSMUSG00000020303	-1.20886
																								ENSMUSG00000021411	-0.406803	4.20371	12.7429	0.000357369	0.00473204																			ENSMUSG00000048379	0.567028
																								ENSMUSG00000018537	-0.394144	3.00656	12.7414	0.000357654	0.00473204																			ENSMUSG00000014164	-0.795385
																								ENSMUSG00000070780	-0.825675	1.41711	12.7411	0.000357713	0.00473204																			ENSMUSG00000036833	-0.67729
																								ENSMUSG00000028348	0.525599	6.9918	12.7405	0.000357815	0.00473204																			ENSMUSG00000066319	2.4581
																								ENSMUSG00000026637	-0.561833	2.76943	12.7361	0.000358661	0.00473799																			ENSMUSG00000038150	-0.533779
																								ENSMUSG00000022704	-0.491123	3.70626	12.7326	0.000359334	0.00473799																			ENSMUSG00000034292	0.797097
																								ENSMUSG00000040812	0.76851	1.05618	12.7317	0.000359508	0.00473799																			ENSMUSG00000006169	0.449305
																								ENSMUSG00000010830	-0.477703	3.55794	12.731	0.000359654	0.00473799																			ENSMUSG00000048281	1.6528
																								ENSMUSG00000001062	0.278382	4.69988	12.7278	0.000360252	0.00474129																			ENSMUSG00000005320	0.471784
																								ENSMUSG00000033182	0.435499	6.3481	12.7236	0.000361078	0.00474758																			ENSMUSG00000007989	-0.86724
																								ENSMUSG00000060843	0.443645	5.5296	12.7156	0.00036262	0.00476076																			ENSMUSG00000027809	0.514034
																								ENSMUSG00000029361	-0.976404	1.65788	12.7148	0.000362778	0.00476076																			ENSMUSG00000024583	0.414894
																								ENSMUSG00000023150	0.555091	10.3137	12.7056	0.000364563	0.00477959																			ENSMUSG00000024901	-1.08297
																								ENSMUSG00000027611	-0.962098	3.44163	12.7014	0.000365386	0.00478579																			ENSMUSG00000060147	-0.568633
																								ENSMUSG00000042500	0.248481	4.76627	12.6937	0.000366885	0.00480081																			ENSMUSG00000049764	0.672021
																								ENSMUSG00000026664	0.392339	8.82972	12.6861	0.000368377	0.00481571																			ENSMUSG00000030243	0.563667
																								ENSMUSG00000030852	0.491357	8.30166	12.6771	0.000370168	0.00482801																			ENSMUSG00000024622	0.444812
																								ENSMUSG00000017221	0.229478	6.6379	12.6757	0.000370443	0.00482801																			ENSMUSG00000020882	-0.881173
																								ENSMUSG00000043811	1.14484	3.11841	12.6743	0.000370715	0.00482801																			ENSMUSG00000025491	-0.775869
																								ENSMUSG00000034064	-0.253934	4.25027	12.6742	0.000370733	0.00482801																			ENSMUSG00000036636	0.377138
																								ENSMUSG00000006526	-0.338006	3.88845	12.6643	0.000372713	0.00484917																			ENSMUSG00000050335	-0.793354
																								ENSMUSG00000010066	-0.87962	4.39118	12.6592	0.000373726	0.00485773																			ENSMUSG00000066072	-1.29496
																								ENSMUSG00000014470	0.344668	5.55991	12.6565	0.000374255	0.00485998																			ENSMUSG00000020758	-0.778246
																								ENSMUSG00000025321	-0.602319	2.83593	12.6535	0.000374857	0.00486028																			ENSMUSG00000021830	-0.727786
																								ENSMUSG00000005682	-0.199243	4.89703	12.6529	0.000374991	0.00486028																			ENSMUSG00000046573	0.783065
																								ENSMUSG00000030615	0.235415	5.68809	12.6497	0.00037563	0.00486349																			ENSMUSG00000019854	0.389071
																								ENSMUSG00000040605	-0.677916	5.12826	12.6481	0.000375952	0.00486349																			ENSMUSG00000027684	-0.479101
																								ENSMUSG00000037339	0.282775	5.37494	12.6362	0.000378342	0.00488979																			ENSMUSG00000025277	-0.763796
																								ENSMUSG00000015932	-0.273919	7.26695	12.6288	0.000379843	0.00490454																			ENSMUSG00000031216	-0.462926
																								ENSMUSG00000004565	-0.299885	4.43829	12.6262	0.000380387	0.00490692																			ENSMUSG00000074217	0.838098
																								ENSMUSG00000034203	0.305784	4.92762	12.6105	0.000383586	0.0049395																			ENSMUSG00000020102	-0.625256
																								ENSMUSG00000045776	0.529885	8.86219	12.6103	0.000383637	0.0049395																			ENSMUSG00000023043	-1.07072
																								ENSMUSG00000029449	-0.683408	1.05156	12.5999	0.000385775	0.00496225																			ENSMUSG00000032314	0.51318
																								ENSMUSG00000025545	0.316767	5.67277	12.5981	0.00038613	0.00496225																			ENSMUSG00000026879	-0.606142
																								ENSMUSG00000033629	-0.237215	5.16423	12.5934	0.000387101	0.00496947																			ENSMUSG00000089694	1.27468
																								ENSMUSG00000031748	-0.559837	5.2023	12.5919	0.000387421	0.00496947																			ENSMUSG00000036391	0.570138
																								ENSMUSG00000032402	-0.290523	5.29396	12.583	0.000389262	0.00498398																			ENSMUSG00000047454	0.949642
																								ENSMUSG00000030037	0.236914	5.55508	12.5829	0.000389282	0.00498398																			ENSMUSG00000026888	-0.766847
																								ENSMUSG00000026857	0.405982	4.25376	12.576	0.00039073	0.004996																			ENSMUSG00000061119	0.715536
																								ENSMUSG00000061650	0.224574	4.69543	12.5746	0.000391017	0.004996																			ENSMUSG00000045827	-0.618165
																								ENSMUSG00000035297	0.20239	6.34677	12.5717	0.000391623	0.004996																			ENSMUSG00000025243	0.513737
																								ENSMUSG00000035311	0.342933	5.82006	12.5714	0.000391685	0.004996																			ENSMUSG00000027276	-0.517128
																								ENSMUSG00000025138	-0.274264	3.97221	12.5585	0.000394399	0.00502197																			ENSMUSG00000030704	0.398855
																								ENSMUSG00000032198	-0.339298	6.47772	12.5578	0.00039455	0.00502197																			ENSMUSG00000005886	0.617028
																								ENSMUSG00000039263	0.229195	6.30619	12.5565	0.000394825	0.00502197																			ENSMUSG00000026817	-0.645006
																								ENSMUSG00000074899	-1.02048	1.49739	12.5489	0.000396434	0.00503427																			ENSMUSG00000006651	-0.67841
																								ENSMUSG00000023022	-0.318244	5.48602	12.5485	0.00039653	0.00503427																			ENSMUSG00000017831	0.346738
																								ENSMUSG00000038412	0.274646	7.17245	12.5396	0.000398424	0.00505362																			ENSMUSG00000028007	0.500528
																								ENSMUSG00000059363	0.348333	3.78779	12.5283	0.000400828	0.00507939																			ENSMUSG00000035852	-1.1284
																								ENSMUSG00000054966	-1.04359	0.912213	12.5254	0.000401465	0.00508274																			ENSMUSG00000055917	0.502056
																								ENSMUSG00000032470	-0.32235	3.70329	12.507	0.000405424	0.00512724																			ENSMUSG00000034472	-0.980385
																								ENSMUSG00000025410	0.192503	7.11869	12.503	0.000406291	0.00512724																			ENSMUSG00000028278	-0.550228
																								ENSMUSG00000030335	0.261707	6.89356	12.5024	0.000406429	0.00512724																			ENSMUSG00000026024	0.611144
																								ENSMUSG00000036617	0.460557	6.01661	12.4983	0.000407312	0.00512724																			ENSMUSG00000018846	0.516754
																								ENSMUSG00000019370	0.212727	7.51476	12.4977	0.000407448	0.00512724																			ENSMUSG00000056938	0.536254
																								ENSMUSG00000029838	-0.976094	2.98139	12.4971	0.000407595	0.00512724																			ENSMUSG00000043144	-0.938638
																								ENSMUSG00000117924	0.245987	4.93048	12.4951	0.000408031	0.00512724																			ENSMUSG00000072676	0.635175
																								ENSMUSG00000061838	0.335182	7.72972	12.4936	0.000408355	0.00512724																			ENSMUSG00000062373	-0.522698
																								ENSMUSG00000021893	0.198081	6.0853	12.4918	0.000408733	0.00512724																			ENSMUSG00000009545	-0.760722
																								ENSMUSG00000053175	-0.508978	2.52485	12.4918	0.000408737	0.00512724																			ENSMUSG00000022820	0.592486
																								ENSMUSG00000024187	0.312329	6.64559	12.4873	0.000409731	0.00513032																			ENSMUSG00000047501	-0.986468
																								ENSMUSG00000002781	0.35871	6.45605	12.4873	0.000409734	0.00513032																			ENSMUSG00000052485	-0.938362
																								ENSMUSG00000029017	0.327002	7.35548	12.4778	0.000411813	0.00515163																			ENSMUSG00000002980	-0.856534
																								ENSMUSG00000055932	0.18422	6.16149	12.4644	0.00041479	0.00518412																			ENSMUSG00000020697	0.499042
																								ENSMUSG00000062234	-0.226069	5.15543	12.4621	0.000415283	0.00518553																			ENSMUSG00000090394	-0.535856
																								ENSMUSG00000076441	-0.470237	3.00383	12.4601	0.000415747	0.00518658																			ENSMUSG00000062609	0.639217
																								ENSMUSG00000017453	-0.72369	-0.0559771	12.4522	0.000417502	0.00519999																			ENSMUSG00000040728	-0.714007
																								ENSMUSG00000064357	0.482625	4.75983	12.4518	0.000417584	0.00519999																			ENSMUSG00000070372	0.631418
																								ENSMUSG00000054889	0.42966	10.4362	12.4447	0.000419189	0.00521521																			ENSMUSG00000042364	0.394236
																								ENSMUSG00000023460	0.281855	7.41626	12.4387	0.000420532	0.00522716																			ENSMUSG00000033808	0.461887
																								ENSMUSG00000005968	-0.727375	2.68931	12.4323	0.000421971	0.00524027																			ENSMUSG00000021974	-0.719085
																								ENSMUSG00000031963	0.65996	3.01769	12.4289	0.000422744	0.00524118																			ENSMUSG00000023025	0.490593
																								ENSMUSG00000027470	-1.16294	0.077617	12.4286	0.000422812	0.00524118																			ENSMUSG00000118559	-0.777303
																								ENSMUSG00000026179	0.294898	5.8206	12.4131	0.000426324	0.00527521																			ENSMUSG00000026343	-0.926105
																								ENSMUSG00000031782	0.387325	8.69512	12.4131	0.00042633	0.00527521																			ENSMUSG00000029829	-0.931906
																								ENSMUSG00000064345	0.431285	13.1823	12.408	0.00042749	0.00528476																			ENSMUSG00000033533	-1.1519
																								ENSMUSG00000009863	0.33739	9.38357	12.4048	0.000428242	0.00528818																			ENSMUSG00000038206	0.421913
																								ENSMUSG00000045411	-0.451785	3.95054	12.4035	0.000428541	0.00528818																			ENSMUSG00000028032	0.389111
																								ENSMUSG00000060586	-1.02556	4.59792	12.3993	0.000429489	0.00529509																			ENSMUSG00000074863	-0.765695
																								ENSMUSG00000034449	0.330073	6.3542	12.3723	0.000435752	0.00536746																			ENSMUSG00000004891	-0.57239
																								ENSMUSG00000005981	0.305208	7.4166	12.3619	0.000438175	0.0053908																			ENSMUSG00000001672	-0.577637
																								ENSMUSG00000020173	-0.542868	3.6598	12.3606	0.000438492	0.0053908																			ENSMUSG00000046432	-0.739808
																								ENSMUSG00000030124	-0.803205	0.354062	12.3591	0.000438832	0.0053908																			ENSMUSG00000023236	-1.37959
																								ENSMUSG00000034926	-0.487814	3.26461	12.3529	0.000440301	0.00540398																			ENSMUSG00000016194	1.64133
																								ENSMUSG00000001445	0.287742	5.83596	12.3451	0.000442147	0.00542028																			ENSMUSG00000024228	0.530588
																								ENSMUSG00000018893	0.420769	13.3439	12.3439	0.000442423	0.00542028																			ENSMUSG00000027552	0.528557
																								ENSMUSG00000023439	0.996721	3.68806	12.3418	0.000442928	0.00542159																			ENSMUSG00000061665	-0.422406
																								ENSMUSG00000034220	0.38181	8.59215	12.3356	0.000444397	0.0054347																			ENSMUSG00000035459	-1.5228
																								ENSMUSG00000023336	-0.444118	3.35653	12.3289	0.000445992	0.00544933																			ENSMUSG00000038541	1.44756
																								ENSMUSG00000029020	0.353208	9.68523	12.327	0.000446451	0.00545005																			ENSMUSG00000030287	-0.856278
																								ENSMUSG00000022562	0.237954	5.81332	12.32	0.000448132	0.00546568																			ENSMUSG00000042359	0.556847
																								ENSMUSG00000031825	0.355279	6.20987	12.308	0.000451011	0.00549185																			ENSMUSG00000031633	-0.440565
																								ENSMUSG00000030554	-0.416545	5.35436	12.3077	0.000451082	0.00549185																			ENSMUSG00000031903	-0.615868
																								ENSMUSG00000001280	-0.237324	6.18421	12.2974	0.00045359	0.00551747																			ENSMUSG00000022663	0.574019
																								ENSMUSG00000041616	-1.09317	11.7523	12.2767	0.000458642	0.00557395																			ENSMUSG00000025899	0.492931
																								ENSMUSG00000011305	0.45333	6.72256	12.2702	0.00046026	0.00558864																			ENSMUSG00000050520	-0.603273
																								ENSMUSG00000039031	-0.271316	5.1285	12.2605	0.000462648	0.00561265																			ENSMUSG00000040560	0.45564
																								ENSMUSG00000031327	-0.562183	1.936	12.2584	0.000463158	0.00561383																			ENSMUSG00000042073	0.444773
																								ENSMUSG00000055235	-0.823725	1.31505	12.25	0.000465255	0.00563425																			ENSMUSG00000039458	0.472018
																								ENSMUSG00000020079	0.323541	5.11349	12.228	0.000470785	0.00569492																			ENSMUSG00000090799	-1.21139
																								ENSMUSG00000031517	-0.916225	5.90588	12.2267	0.0004711	0.00569492																			ENSMUSG00000030108	-0.723097
																								ENSMUSG00000030986	0.389207	5.63175	12.2187	0.000473132	0.00571007																			ENSMUSG00000030930	-0.740213
																								ENSMUSG00000022214	0.239809	7.58541	12.2185	0.000473189	0.00571007																			ENSMUSG00000045932	-0.670613
																								ENSMUSG00000007097	0.473802	8.65973	12.2121	0.000474805	0.0057245																			ENSMUSG00000020570	0.442557
																								ENSMUSG00000024978	0.401747	7.98533	12.1831	0.000482234	0.00580894																			ENSMUSG00000043639	-0.664375
																								ENSMUSG00000049281	-0.665728	2.04935	12.1794	0.000483191	0.00581533																			ENSMUSG00000072501	0.498381
																								ENSMUSG00000026554	0.207508	7.70057	12.1742	0.000484552	0.00582321																			ENSMUSG00000005615	0.512473
																								ENSMUSG00000027439	0.286189	5.50433	12.1736	0.000484699	0.00582321																			ENSMUSG00000027803	0.350324
																								ENSMUSG00000031972	1.73102	7.04532	12.1702	0.000485589	0.00582688																			ENSMUSG00000021219	-0.600713
																								ENSMUSG00000024944	0.243062	5.10207	12.1692	0.000485858	0.00582688																			ENSMUSG00000037995	-1.01133
																								ENSMUSG00000030218	-0.643504	8.03628	12.1637	0.000487296	0.005839																			ENSMUSG00000031398	-0.827883
																								ENSMUSG00000036257	0.202718	7.41286	12.1553	0.000489486	0.00586009																			ENSMUSG00000061578	1.19064
																								ENSMUSG00000033075	-0.226965	4.48339	12.1363	0.000494487	0.00591463																			ENSMUSG00000072946	0.388285
																								ENSMUSG00000040883	0.295341	5.15212	12.1335	0.000495237	0.00591463																			ENSMUSG00000031490	-0.700912
																								ENSMUSG00000022102	-0.693029	2.45353	12.1331	0.000495341	0.00591463																			ENSMUSG00000059708	-0.623511
																								ENSMUSG00000015846	0.224812	6.35597	12.1064	0.000502487	0.00599471																			ENSMUSG00000031066	-0.612792
																								ENSMUSG00000061451	-0.89928	3.80532	12.0978	0.000504806	0.00601258																			ENSMUSG00000061689	-0.49162
																								ENSMUSG00000053226	0.332627	2.99819	12.0976	0.000504867	0.00601258																			ENSMUSG00000054763	-1.63906
																								ENSMUSG00000022711	0.212435	5.034	12.0843	0.00050849	0.00604856																			ENSMUSG00000020228	0.50813
																								ENSMUSG00000037992	-0.322158	3.95831	12.0832	0.000508774	0.00604856																			ENSMUSG00000038486	-0.766976
																								ENSMUSG00000015653	-0.989349	1.01265	12.0788	0.000509991	0.00605775																			ENSMUSG00000031985	0.472391
																								ENSMUSG00000004707	-0.977885	1.24457	12.0719	0.000511878	0.00607488																			ENSMUSG00000024376	-0.795977
																								ENSMUSG00000023267	0.601208	1.26448	12.069	0.000512679	0.0060791																			ENSMUSG00000031024	-0.465182
																								ENSMUSG00000031980	-1.0319	2.0891	12.0648	0.000513815	0.00608728																			ENSMUSG00000028456	-0.654396
																								ENSMUSG00000055027	0.319609	8.83404	12.0619	0.000514618	0.00609151																			ENSMUSG00000020607	-0.974279
																								ENSMUSG00000030515	0.368671	5.61449	12.0581	0.000515688	0.00609889																			ENSMUSG00000052911	-0.411845
																								ENSMUSG00000034793	0.267657	4.83791	12.0539	0.000516833	0.00610009																			ENSMUSG00000001864	-0.736221
																								ENSMUSG00000022123	-1.38071	1.27821	12.0532	0.000517034	0.00610009																			ENSMUSG00000022594	-1.09445
																								ENSMUSG00000030319	0.458311	6.88174	12.0529	0.000517131	0.00610009																			ENSMUSG00000091813	1.04324
																								ENSMUSG00000027560	-0.897719	0.818971	12.0478	0.000518529	0.00611059																			ENSMUSG00000032560	0.63118
																								ENSMUSG00000025978	-0.396578	3.95359	12.0464	0.000518917	0.00611059																			ENSMUSG00000021147	0.356257
																								ENSMUSG00000027282	0.236713	7.06726	12.0432	0.000519807	0.0061158																			ENSMUSG00000039438	0.673789
																								ENSMUSG00000034059	-0.789716	0.576061	12.0378	0.000521334	0.00612618																			ENSMUSG00000042323	0.468061
																								ENSMUSG00000026623	0.331379	7.24792	12.0368	0.000521598	0.00612618																			ENSMUSG00000022197	0.653164
																								ENSMUSG00000062373	0.26262	8.36125	12.0353	0.000522036	0.00612618																			ENSMUSG00000026437	-0.564548
																								ENSMUSG00000049643	0.33251	5.38351	12.0292	0.000523726	0.00613363																			ENSMUSG00000011148	-0.85659
																								ENSMUSG00000027257	0.348017	7.06422	12.0283	0.000523987	0.00613363																			ENSMUSG00000026479	-0.93013
																								ENSMUSG00000021062	-0.799475	0.664479	12.0282	0.000524019	0.00613363																			ENSMUSG00000063268	0.597788
																								ENSMUSG00000006204	-1.22946	2.70404	12.0056	0.000530409	0.00620212																			ENSMUSG00000030275	-0.535162
																								ENSMUSG00000023055	0.273092	7.23139	12.0043	0.000530779	0.00620212																			ENSMUSG00000006777	-1.09184
																								ENSMUSG00000020572	0.557596	7.40359	11.9995	0.000532138	0.00621267																			ENSMUSG00000046572	0.666523
																								ENSMUSG00000045312	-0.448937	3.38464	11.9913	0.000534483	0.00623472																			ENSMUSG00000026356	0.349835
																								ENSMUSG00000028295	0.302389	4.46991	11.9847	0.000536396	0.00624744																			ENSMUSG00000033624	0.824971
																								ENSMUSG00000039206	-0.399608	4.33331	11.9844	0.000536489	0.00624744																			ENSMUSG00000019990	-0.781683
																								ENSMUSG00000042712	-0.43395	4.48456	11.9824	0.000537057	0.00624873																			ENSMUSG00000017677	-0.721118
																								ENSMUSG00000027323	-0.676301	0.141983	11.9803	0.000537673	0.00625056																			ENSMUSG00000001576	0.557311
																								ENSMUSG00000015843	0.429253	5.89976	11.9748	0.000539244	0.00625403																			ENSMUSG00000044308	0.439619
																								ENSMUSG00000035673	-0.341589	4.67832	11.973	0.000539769	0.00625403																			ENSMUSG00000059248	-0.47587
																								ENSMUSG00000040829	-0.52738	2.89688	11.9728	0.000539833	0.00625403																			ENSMUSG00000025245	0.489417
																								ENSMUSG00000018168	-1.05447	2.10818	11.9714	0.000540246	0.00625403																			ENSMUSG00000026175	0.515421
																								ENSMUSG00000022013	0.267277	6.42155	11.9713	0.000540262	0.00625403																			ENSMUSG00000061244	0.365288
																								ENSMUSG00000020607	-1.37222	2.66589	11.9642	0.000542315	0.00627247																			ENSMUSG00000021255	-0.592425
																								ENSMUSG00000032612	0.188073	6.58828	11.9583	0.00054405	0.00628721																			ENSMUSG00000030660	0.411437
																								ENSMUSG00000026228	-1.30544	-0.0100535	11.951	0.000546168	0.00630635																			ENSMUSG00000006599	0.469386
																								ENSMUSG00000003484	-0.953585	2.42621	11.9436	0.000548348	0.00632258																			ENSMUSG00000037012	-0.723912
																								ENSMUSG00000029675	-0.689634	6.35672	11.9431	0.000548501	0.00632258																			ENSMUSG00000039639	-1.08428
																								ENSMUSG00000030095	-0.252899	5.19422	11.9346	0.000551012	0.00634618																			ENSMUSG00000069539	0.490016
																								ENSMUSG00000013833	0.316391	5.34189	11.9299	0.0005524	0.00635429																			ENSMUSG00000032320	-0.401115
																								ENSMUSG00000027489	-0.907129	0.257714	11.9291	0.000552648	0.00635429																			ENSMUSG00000045576	0.477707
																								ENSMUSG00000024420	-0.312435	4.92448	11.9273	0.000553186	0.00635513																			ENSMUSG00000026065	-1.01326
																								ENSMUSG00000012428	0.28453	5.40279	11.9203	0.000555254	0.00637352																			ENSMUSG00000032231	-0.511261
																								ENSMUSG00000028013	0.246395	6.77368	11.9135	0.000557286	0.00638925																			ENSMUSG00000045136	-0.796994
																								ENSMUSG00000031365	-0.317128	4.85342	11.9126	0.000557562	0.00638925																			ENSMUSG00000032294	-0.89902
																								ENSMUSG00000047090	-0.380946	3.40948	11.9009	0.000561072	0.00642408																			ENSMUSG00000007617	0.589636
																								ENSMUSG00000029466	0.245646	5.58864	11.8974	0.000562126	0.0064299																			ENSMUSG00000012422	0.403452
																								ENSMUSG00000029752	-0.599248	2.29615	11.8961	0.000562522	0.0064299																			ENSMUSG00000029449	-0.772565
																								ENSMUSG00000028484	-0.371309	5.17549	11.8868	0.000565346	0.00645495																			ENSMUSG00000050295	-0.585976
																								ENSMUSG00000027304	0.198105	5.75219	11.8857	0.00056566	0.00645495																			ENSMUSG00000045871	2.30364
																								ENSMUSG00000018566	0.351561	8.60119	11.8785	0.000567851	0.00647455																			ENSMUSG00000030621	-0.619039
																								ENSMUSG00000054452	0.249307	9.21784	11.8718	0.000569898	0.00649246																			ENSMUSG00000022401	0.584397
																								ENSMUSG00000074771	-1.79894	-0.0353371	11.8655	0.000571841	0.00650917																			ENSMUSG00000010175	-0.767299
																								ENSMUSG00000025393	0.359032	12.3511	11.8598	0.000573579	0.00651823																			ENSMUSG00000073802	-0.91724
																								ENSMUSG00000031548	-0.59617	5.76477	11.8598	0.000573592	0.00651823																			ENSMUSG00000038615	-0.394267
																								ENSMUSG00000039542	-0.497775	3.29559	11.8497	0.000576722	0.00654184																			ENSMUSG00000020868	-0.451861
																								ENSMUSG00000025059	0.322868	5.80762	11.8493	0.000576837	0.00654184																			ENSMUSG00000023216	-2.54724
																								ENSMUSG00000038880	0.336632	5.43964	11.8484	0.000577109	0.00654184																			ENSMUSG00000031095	0.361776
																								ENSMUSG00000023832	-0.455637	2.8984	11.8394	0.000579911	0.00656815																			ENSMUSG00000024354	-0.453861
																								ENSMUSG00000038582	0.41816	7.73908	11.8318	0.000582263	0.00658598																			ENSMUSG00000047746	1.64149
																								ENSMUSG00000078578	0.20306	8.42575	11.8312	0.00058245	0.00658598																			ENSMUSG00000007777	0.392531
																								ENSMUSG00000064246	-1.15888	1.27871	11.8287	0.000583254	0.00658962																			ENSMUSG00000027678	0.478918
																								ENSMUSG00000029168	-0.82084	1.01569	11.8258	0.000584144	0.00659421																			ENSMUSG00000027610	0.57529
																								ENSMUSG00000035754	0.267527	5.39797	11.8242	0.000584672	0.00659471																			ENSMUSG00000046719	-1.28614
																								ENSMUSG00000029610	0.283055	4.15901	11.8214	0.000585534	0.00659899																			ENSMUSG00000031119	0.549926
																								ENSMUSG00000019143	0.213812	5.13138	11.8056	0.000590539	0.0066499																			ENSMUSG00000068551	-0.681439
																								ENSMUSG00000021226	0.411209	5.4668	11.8035	0.000591185	0.00665168																			ENSMUSG00000049971	1.49182
																								ENSMUSG00000067194	0.181756	6.45233	11.7951	0.000593875	0.00667346																			ENSMUSG00000073433	-1.11061
																								ENSMUSG00000037784	-0.466789	2.56839	11.7944	0.000594098	0.00667346																			ENSMUSG00000001946	-0.460028
																								ENSMUSG00000037965	-0.196329	5.9605	11.7655	0.000603375	0.00677209																			ENSMUSG00000054889	-0.827535
																								ENSMUSG00000026170	0.32115	4.61706	11.7536	0.000607258	0.00681007																			ENSMUSG00000030987	-0.545403
																								ENSMUSG00000020773	-0.531298	5.17063	11.7497	0.000608531	0.00681875																			ENSMUSG00000029314	-1.03637
																								ENSMUSG00000025465	0.320657	8.34433	11.7421	0.000611014	0.00684095																			ENSMUSG00000073643	0.511959
																								ENSMUSG00000007656	0.251188	6.219	11.7387	0.000612142	0.00684712																			ENSMUSG00000033392	-0.423434
																								ENSMUSG00000074623	0.785651	2.64798	11.7374	0.000612569	0.00684712																			ENSMUSG00000032908	-0.735364
																								ENSMUSG00000032175	-0.277282	4.83712	11.7291	0.000615317	0.00687222																			ENSMUSG00000061451	-0.762407
																								ENSMUSG00000004791	0.664277	2.36611	11.7262	0.000616247	0.00687698																			ENSMUSG00000068686	-0.958655
																								ENSMUSG00000056900	0.436168	7.89976	11.7197	0.000618427	0.00689566																			ENSMUSG00000026748	0.545552
																								ENSMUSG00000037736	0.384433	7.72047	11.7179	0.000619029	0.00689674																			ENSMUSG00000052544	-0.840878
																								ENSMUSG00000022407	0.28852	5.95889	11.7145	0.000620159	0.0069037																			ENSMUSG00000029636	-0.710238
																								ENSMUSG00000046603	0.390617	5.63815	11.7128	0.000620727	0.00690439																			ENSMUSG00000019951	0.474724
																								ENSMUSG00000032030	0.198815	6.0493	11.7103	0.000621536	0.00690775																			ENSMUSG00000022070	-0.835884
																								ENSMUSG00000031299	0.315373	10.3858	11.7027	0.000624104	0.00693065																			ENSMUSG00000005148	-0.747767
																								ENSMUSG00000031701	0.266442	8.01273	11.6912	0.000627957	0.00696221																			ENSMUSG00000025104	-0.592193
																								ENSMUSG00000022677	0.274861	5.84233	11.6908	0.000628093	0.00696221																			ENSMUSG00000038174	0.599095
																								ENSMUSG00000030577	-1.31046	2.65967	11.6896	0.000628497	0.00696221																			ENSMUSG00000006740	0.445954
																								ENSMUSG00000019986	-0.463424	2.72522	11.6882	0.000628987	0.00696221																			ENSMUSG00000040044	0.510007
																								ENSMUSG00000002274	0.349097	3.96815	11.6844	0.000630248	0.00697052																			ENSMUSG00000029299	1.77401
																								ENSMUSG00000029999	-0.842344	2.74753	11.6829	0.000630758	0.00697052																			ENSMUSG00000021760	-0.557354
																								ENSMUSG00000039607	-0.356936	4.42327	11.6785	0.000632254	0.0069814																			ENSMUSG00000027860	0.664975
																								ENSMUSG00000044442	0.257983	4.42629	11.6736	0.00063393	0.00699424																			ENSMUSG00000017688	0.842828
																								ENSMUSG00000035000	-0.841386	5.16386	11.6718	0.00063456	0.00699554																			ENSMUSG00000038963	-0.92564
																								ENSMUSG00000043004	-0.811134	4.77711	11.6702	0.000635096	0.00699579																			ENSMUSG00000070287	-0.818419
																								ENSMUSG00000026042	-0.345927	6.02866	11.6666	0.000636322	0.00700365																			ENSMUSG00000024120	0.41271
																								ENSMUSG00000067369	0.214355	6.51409	11.6609	0.000638262	0.00701565																			ENSMUSG00000081984	-1.44391
																								ENSMUSG00000004070	0.253775	5.64572	11.6599	0.000638621	0.00701565																			ENSMUSG00000026394	-0.74728
																								ENSMUSG00000023020	0.236087	6.32339	11.6589	0.000638955	0.00701565																			ENSMUSG00000050737	-0.696049
																								ENSMUSG00000047260	0.252978	5.39992	11.6549	0.00064034	0.00702521																			ENSMUSG00000028865	-1.02422
																								ENSMUSG00000035232	-0.759	2.55319	11.6471	0.000643026	0.00704901																			ENSMUSG00000027887	0.724765
																								ENSMUSG00000019737	-0.754984	-0.253377	11.6425	0.000644621	0.00706083																			ENSMUSG00000004044	-0.501001
																								ENSMUSG00000005360	-0.952909	2.71043	11.6406	0.000645287	0.00706245																			ENSMUSG00000031144	-0.679669
																								ENSMUSG00000026526	0.345658	8.60092	11.6367	0.000646637	0.0070703																			ENSMUSG00000017718	0.810966
																								ENSMUSG00000031333	0.276708	5.7152	11.6355	0.00064704	0.0070703																			ENSMUSG00000023977	0.697712
																								ENSMUSG00000029234	-0.247042	4.94348	11.6284	0.00064954	0.00709193																			ENSMUSG00000109718	-1.52067
																								ENSMUSG00000021213	-0.720327	1.47486	11.6262	0.000650299	0.00709455																			ENSMUSG00000036402	0.378746
																								ENSMUSG00000037280	-0.886729	2.0379	11.6244	0.000650909	0.00709553																			ENSMUSG00000031012	-0.460051
																								ENSMUSG00000037257	0.232148	4.68083	11.6219	0.000651813	0.00709613																			ENSMUSG00000049091	0.668509
																								ENSMUSG00000032492	-0.473721	2.48339	11.6211	0.000652088	0.00709613																			ENSMUSG00000029802	0.588693
																								ENSMUSG00000026163	-1.09604	3.16178	11.6196	0.000652605	0.00709613																			ENSMUSG00000029722	-0.372577
																								ENSMUSG00000020928	0.580978	2.2963	11.6169	0.000653542	0.00709613																			ENSMUSG00000043991	0.410484
																								ENSMUSG00000034245	0.259398	5.08909	11.6169	0.000653564	0.00709613																			ENSMUSG00000032679	-0.639256
																								ENSMUSG00000035726	-0.17278	5.64257	11.6135	0.000654765	0.00709958																			ENSMUSG00000029869	-1.2016
																								ENSMUSG00000069135	0.311738	4.57595	11.613	0.000654922	0.00709958																			ENSMUSG00000020255	0.591285
																								ENSMUSG00000032289	-0.776185	3.87168	11.5967	0.000660685	0.00715637																			ENSMUSG00000039704	0.546622
																								ENSMUSG00000015094	-0.302026	4.73962	11.5927	0.000662111	0.00716613																			ENSMUSG00000028128	0.978562
																								ENSMUSG00000020432	-0.251104	6.02846	11.5858	0.000664557	0.00718691																			ENSMUSG00000031010	0.710868
																								ENSMUSG00000050229	-0.279345	4.0294	11.5831	0.000665543	0.00719187																			ENSMUSG00000058351	0.557043
																								ENSMUSG00000036411	-0.789208	0.324285	11.5674	0.000671177	0.00724702																			ENSMUSG00000032718	-0.669646
																								ENSMUSG00000020695	-0.288124	5.2118	11.5599	0.000673878	0.00726757																			ENSMUSG00000025608	-0.546394
																								ENSMUSG00000012819	0.498252	3.83007	11.5592	0.000674146	0.00726757																			ENSMUSG00000045348	-0.749897
																								ENSMUSG00000022437	0.285332	7.62886	11.5532	0.000676339	0.00728545																			ENSMUSG00000020128	0.36262
																								ENSMUSG00000028538	0.326718	5.95051	11.5496	0.000677633	0.00729361																			ENSMUSG00000022358	-0.720352
																								ENSMUSG00000022206	-0.881471	7.34758	11.5482	0.000678165	0.00729361																			ENSMUSG00000018428	0.471268
																								ENSMUSG00000056999	0.320478	6.65757	11.5457	0.000679078	0.00729768																			ENSMUSG00000030042	0.563651
																								ENSMUSG00000036948	-0.318806	3.52728	11.5406	0.000680921	0.00731173																			ENSMUSG00000031548	-0.554324
																								ENSMUSG00000044405	-1.48813	1.29988	11.5361	0.000682564	0.00731886																			ENSMUSG00000027956	0.649923
																								ENSMUSG00000069920	-0.485842	3.22922	11.5331	0.000683673	0.00731886																			ENSMUSG00000007411	0.370218
																								ENSMUSG00000032246	-0.824791	0.277933	11.5318	0.000684163	0.00731886																			ENSMUSG00000017950	0.602522
																								ENSMUSG00000058444	0.186099	4.27074	11.5316	0.000684245	0.00731886																			ENSMUSG00000025578	0.622634
																								ENSMUSG00000015290	0.272022	6.50265	11.5309	0.000684488	0.00731886																			ENSMUSG00000046230	0.514469
																								ENSMUSG00000028837	0.20396	6.20941	11.5289	0.000685218	0.00731886																			ENSMUSG00000022885	-0.588539
																								ENSMUSG00000027827	0.709357	1.88918	11.5269	0.000685961	0.00731886																			ENSMUSG00000039004	0.481443
																								ENSMUSG00000030946	0.411633	3.83777	11.5266	0.000686073	0.00731886																			ENSMUSG00000040407	0.482556
																								ENSMUSG00000024270	-0.282199	3.21905	11.5257	0.000686411	0.00731886																			ENSMUSG00000033578	-0.759801
																								ENSMUSG00000034463	-0.701337	2.71022	11.5228	0.000687466	0.00732438																			ENSMUSG00000055994	1.10544
																								ENSMUSG00000027820	0.291869	4.60819	11.5201	0.000688476	0.00732942																			ENSMUSG00000028530	0.464394
																								ENSMUSG00000067149	-1.62139	2.96515	11.5186	0.00068903	0.00732958																			ENSMUSG00000027188	-0.756548
																								ENSMUSG00000066892	-0.261431	4.35731	11.5172	0.000689565	0.00732958																			ENSMUSG00000042524	-0.415233
																								ENSMUSG00000048218	-0.725257	4.20435	11.5156	0.000690148	0.00733007																			ENSMUSG00000033065	-0.405633
																								ENSMUSG00000040312	-0.44647	2.42238	11.5112	0.000691766	0.00734154																			ENSMUSG00000025154	-0.776926
																								ENSMUSG00000021991	-0.935153	1.74575	11.5013	0.000695458	0.00737028																			ENSMUSG00000015090	-1.12136
																								ENSMUSG00000001865	-1.10639	0.893463	11.5011	0.000695554	0.00737028																			ENSMUSG00000017801	0.363741
																								ENSMUSG00000037824	-0.324497	4.32162	11.4959	0.000697492	0.00738508																			ENSMUSG00000052560	-0.645866
																								ENSMUSG00000005510	0.312871	8.06643	11.4907	0.00069945	0.00740008																			ENSMUSG00000040040	0.604506
																								ENSMUSG00000041360	-0.228506	4.35348	11.4874	0.000700681	0.00740735																			ENSMUSG00000002332	0.499013
																								ENSMUSG00000023861	0.307591	8.06473	11.4805	0.000703296	0.00742924																			ENSMUSG00000032224	-0.699808
																								ENSMUSG00000029869	-0.843428	3.4087	11.4727	0.000706244	0.00745462																			ENSMUSG00000019822	0.369235
																								ENSMUSG00000029847	-1.08162	-0.692809	11.4703	0.000707189	0.00745882																			ENSMUSG00000060923	0.505059
																								ENSMUSG00000048070	-0.707662	3.92996	11.468	0.000708067	0.00746232																			ENSMUSG00000041362	0.653349
																								ENSMUSG00000023307	0.220986	6.08912	11.4613	0.00071062	0.00748345																			ENSMUSG00000027695	-0.631476
																								ENSMUSG00000038276	-0.979088	-0.48493	11.4553	0.000712911	0.00750178																			ENSMUSG00000027894	-0.672155
																								ENSMUSG00000025241	0.447633	9.14363	11.4467	0.00071622	0.00753079																			ENSMUSG00000023153	-1.17426
																								ENSMUSG00000067071	0.284512	3.99248	11.4439	0.000717305	0.0075364																			ENSMUSG00000030849	-0.45726
																								ENSMUSG00000022235	0.425738	4.79086	11.428	0.000723446	0.00759507																			ENSMUSG00000026567	-1.38456
																								ENSMUSG00000040740	0.555985	7.28935	11.4215	0.000725972	0.00761573																			ENSMUSG00000051811	-1.10607
																								ENSMUSG00000022439	-0.667206	1.97688	11.4162	0.000728057	0.00763174																			ENSMUSG00000020952	0.41671
																								ENSMUSG00000008435	0.341918	5.39169	11.4091	0.000730848	0.00764943																			ENSMUSG00000040312	-0.784851
																								ENSMUSG00000032558	-0.384356	3.40083	11.4088	0.000730972	0.00764943																			ENSMUSG00000041817	-1.45919
																								ENSMUSG00000023973	-0.243607	4.35417	11.4076	0.000731426	0.00764943																			ENSMUSG00000048368	1.46314
																								ENSMUSG00000017737	-1.11881	3.10595	11.3976	0.00073538	0.00768033																			ENSMUSG00000025155	0.323782
																								ENSMUSG00000033530	0.366314	6.15022	11.3973	0.000735506	0.00768033																			ENSMUSG00000028919	0.95753
																								ENSMUSG00000025105	-1.09225	3.35442	11.3885	0.000739008	0.007711																			ENSMUSG00000035900	0.547714
																								ENSMUSG00000019188	-0.219965	5.54555	11.3868	0.00073969	0.00771221																			ENSMUSG00000018442	0.436058
																								ENSMUSG00000024511	-0.990137	2.37676	11.3796	0.000742532	0.00773411																			ENSMUSG00000029369	-0.827813
																								ENSMUSG00000019487	0.249696	6.47184	11.3787	0.000742924	0.00773411																			ENSMUSG00000035093	0.568029
																								ENSMUSG00000025324	-0.570397	2.53898	11.3763	0.000743886	0.00773823																			ENSMUSG00000038679	0.845292
																								ENSMUSG00000048142	-1.08237	2.65795	11.3725	0.000745392	0.00774798																			ENSMUSG00000026248	0.342333
																								ENSMUSG00000029195	-2.055	-0.233664	11.3673	0.0007475	0.00776034																			ENSMUSG00000002489	-0.663351
																								ENSMUSG00000038526	0.54223	6.87232	11.3667	0.000747718	0.00776034																			ENSMUSG00000032688	0.732383
																								ENSMUSG00000029163	-0.3779	5.55495	11.3609	0.000750059	0.00777873																			ENSMUSG00000027102	-0.701261
																								ENSMUSG00000007872	-0.408799	5.88803	11.3576	0.000751415	0.00778688																			ENSMUSG00000049799	0.551099
																								ENSMUSG00000030795	-0.205583	8.1129	11.3531	0.000753232	0.00779978																			ENSMUSG00000042429	-0.818668
																								ENSMUSG00000018750	-0.243714	6.58892	11.3467	0.000755816	0.00781134																			ENSMUSG00000031226	-0.433527
																								ENSMUSG00000022788	0.296461	5.83614	11.3436	0.000757102	0.00781134																			ENSMUSG00000069114	-0.533046
																								ENSMUSG00000030536	-0.32705	6.62827	11.3433	0.000757197	0.00781134																			ENSMUSG00000093661	-0.450758
																								ENSMUSG00000024049	0.411866	10.2262	11.3427	0.000757447	0.00781134																			ENSMUSG00000055652	-0.72474
																								ENSMUSG00000036986	-0.379322	4.11271	11.3424	0.000757582	0.00781134																			ENSMUSG00000028182	0.562406
																								ENSMUSG00000019791	0.281962	5.07906	11.3419	0.000757782	0.00781134																			ENSMUSG00000021728	-0.735005
																								ENSMUSG00000028532	-0.385485	3.09294	11.3371	0.000759726	0.00782546																			ENSMUSG00000037098	0.465726
																								ENSMUSG00000027022	0.643973	9.16226	11.3293	0.000762921	0.00784208																			ENSMUSG00000053559	-0.519427
																								ENSMUSG00000024429	0.2089	5.27145	11.3278	0.000763542	0.00784208																			ENSMUSG00000033579	-0.585492
																								ENSMUSG00000048758	0.552178	5.70158	11.3265	0.000764101	0.00784208																			ENSMUSG00000039529	-0.550256
																								ENSMUSG00000020435	0.349966	4.80457	11.3254	0.000764556	0.00784208																			ENSMUSG00000042111	-0.636922
																								ENSMUSG00000001864	-0.643351	2.22853	11.3249	0.000764734	0.00784208																			ENSMUSG00000041650	0.438514
																								ENSMUSG00000071347	0.619471	4.47709	11.3248	0.000764786	0.00784208																			ENSMUSG00000036820	0.666951
																								ENSMUSG00000000594	-0.540058	5.09349	11.3179	0.000767616	0.00786518																			ENSMUSG00000036825	0.480744
																								ENSMUSG00000027346	0.36963	7.61456	11.314	0.00076926	0.00787612																			ENSMUSG00000055044	-0.692699
																								ENSMUSG00000054659	0.603017	5.43756	11.312	0.000770081	0.00787861																			ENSMUSG00000039168	-0.78314
																								ENSMUSG00000021556	-0.463681	5.52672	11.2966	0.000776504	0.00793837																			ENSMUSG00000002565	-0.481485
																								ENSMUSG00000027956	0.637904	5.64414	11.2946	0.000777341	0.00794098																			ENSMUSG00000024404	0.383134
																								ENSMUSG00000019768	-0.723435	1.71021	11.2916	0.000778606	0.00794174																			ENSMUSG00000030536	-0.452242
																								ENSMUSG00000029364	0.219519	6.68681	11.2912	0.000778756	0.00794174																			ENSMUSG00000040441	-1.29558
																								ENSMUSG00000024899	0.34012	3.79386	11.2891	0.000779639	0.00794174																			ENSMUSG00000029438	0.847645
																								ENSMUSG00000032109	0.234094	4.29349	11.2875	0.000780317	0.00794174																			ENSMUSG00000027236	0.410099
																								ENSMUSG00000019179	0.31407	10.1468	11.2875	0.000780325	0.00794174																			ENSMUSG00000043342	-0.707448
																								ENSMUSG00000061665	-0.300773	5.87629	11.2802	0.00078338	0.0079669																			ENSMUSG00000035681	-1.28422
																								ENSMUSG00000026547	-0.413552	6.7314	11.2778	0.000784387	0.00797119																			ENSMUSG00000042686	-1.00089
																								ENSMUSG00000038028	0.43356	6.15902	11.2604	0.000791782	0.00804036																			ENSMUSG00000030352	-0.426236
																								ENSMUSG00000037656	0.252815	7.62944	11.2519	0.000795427	0.00806705																			ENSMUSG00000030109	-1.23231
																								ENSMUSG00000029802	-0.217249	4.49969	11.2515	0.000795593	0.00806705																			ENSMUSG00000048330	-0.808706
																								ENSMUSG00000028080	0.26813	5.66288	11.247	0.000797528	0.00808067																			ENSMUSG00000059213	-0.765391
																								ENSMUSG00000052688	-0.538085	2.72602	11.2433	0.000799101	0.0080906																			ENSMUSG00000045954	-0.649086
																								ENSMUSG00000038403	0.371842	7.53344	11.2359	0.000802321	0.00811718																			ENSMUSG00000022408	-1.28392
																								ENSMUSG00000040473	-0.718467	0.133494	11.2327	0.000803702	0.00812513																			ENSMUSG00000032202	-1.05089
																								ENSMUSG00000033065	0.381693	9.96268	11.229	0.000805304	0.0081353																			ENSMUSG00000118669	-1.10745
																								ENSMUSG00000020777	0.326319	7.84284	11.217	0.000810511	0.00818185																			ENSMUSG00000064215	-0.682146
																								ENSMUSG00000019927	0.250978	5.20217	11.2156	0.000811132	0.00818207																			ENSMUSG00000052812	0.603914
																								ENSMUSG00000029145	0.298905	5.22388	11.2126	0.000812459	0.0081894																			ENSMUSG00000003418	0.465193
																								ENSMUSG00000004151	-0.448559	4.63909	11.2086	0.000814176	0.00820065																			ENSMUSG00000044708	-0.520705
																								ENSMUSG00000034157	0.214523	6.01412	11.2063	0.000815182	0.00820473																			ENSMUSG00000031149	-0.865551
																								ENSMUSG00000023048	-0.296658	5.21493	11.194	0.000820638	0.00825015																			ENSMUSG00000035413	-0.627238
																								ENSMUSG00000021589	0.269092	5.35419	11.1934	0.000820904	0.00825015																			ENSMUSG00000000881	-0.382969
																								ENSMUSG00000014329	-0.479615	6.21638	11.1812	0.000826285	0.00829811																			ENSMUSG00000028803	-0.432672
																								ENSMUSG00000020869	-0.206708	5.62617	11.1758	0.00082873	0.00831655																			ENSMUSG00000037287	0.428507
																								ENSMUSG00000030399	0.508314	10.7716	11.1723	0.000830294	0.00832612																			ENSMUSG00000058355	0.365072
																								ENSMUSG00000002944	0.420493	10.595	11.1657	0.000833236	0.00834949																			ENSMUSG00000034591	0.692556
																								ENSMUSG00000039787	-0.553541	2.20531	11.1505	0.000840083	0.00841193																			ENSMUSG00000028860	-0.95854
																								ENSMUSG00000015357	0.321412	7.03307	11.1471	0.000841638	0.00842131																			ENSMUSG00000052056	0.434432
																								ENSMUSG00000037710	0.289266	7.31993	11.1405	0.000844628	0.00843956																			ENSMUSG00000044807	-0.650814
																								ENSMUSG00000031204	0.429604	2.72309	11.1404	0.000844698	0.00843956																			ENSMUSG00000030208	-0.438893
																								ENSMUSG00000022456	-0.975619	1.17013	11.1349	0.000847203	0.00845839																			ENSMUSG00000006356	-0.418908
																								ENSMUSG00000045165	-0.60782	2.91643	11.126	0.000851258	0.00849267																			ENSMUSG00000027221	-0.704175
																								ENSMUSG00000044221	0.293843	7.76064	11.1234	0.000852459	0.0084938																			ENSMUSG00000031239	-0.65058
																								ENSMUSG00000044337	0.41383	6.79196	11.123	0.000852616	0.0084938																			ENSMUSG00000025204	-0.419626
																								ENSMUSG00000042724	-1.23048	0.237903	11.1202	0.000853926	0.00850064																			ENSMUSG00000016458	-0.685437
																								ENSMUSG00000033788	0.353618	7.13662	11.1153	0.000856174	0.00851681																			ENSMUSG00000033147	-0.667508
																								ENSMUSG00000024442	0.355569	7.38914	11.1038	0.000861508	0.00856363																			ENSMUSG00000023972	-0.520473
																								ENSMUSG00000022853	0.345851	4.20775	11.0843	0.000870602	0.00864409																			ENSMUSG00000032238	0.622357
																								ENSMUSG00000057963	-0.435791	3.32945	11.0838	0.000870869	0.00864409																			ENSMUSG00000026893	-0.631657
																								ENSMUSG00000042298	0.362781	5.77859	11.0819	0.000871753	0.00864657																			ENSMUSG00000057982	0.710696
																								ENSMUSG00000074916	-0.372192	3.2819	11.0774	0.000873869	0.00865662																			ENSMUSG00000028701	-0.583402
																								ENSMUSG00000028782	-0.765997	2.72144	11.077	0.000874034	0.00865662																			ENSMUSG00000022389	0.98805
																								ENSMUSG00000006800	-0.26857	6.6543	11.0707	0.000877022	0.00867991																			ENSMUSG00000028696	0.433535
																								ENSMUSG00000020087	0.232826	4.22618	11.0652	0.000879647	0.00869958																			ENSMUSG00000002847	-0.655116
																								ENSMUSG00000028108	-0.427523	6.05831	11.0627	0.0008808	0.00870467																			ENSMUSG00000046295	1.44119
																								ENSMUSG00000032892	0.382491	4.80898	11.0612	0.000881552	0.00870581																			ENSMUSG00000086587	-1.57836
																								ENSMUSG00000038080	0.229124	4.47639	11.0583	0.000882888	0.00871087																			ENSMUSG00000021678	-0.459828
																								ENSMUSG00000044641	-0.671104	2.6487	11.0564	0.00088381	0.00871087																			ENSMUSG00000030279	-0.483284
																								ENSMUSG00000038253	-1.14554	-0.281897	11.0561	0.000883979	0.00871087																			ENSMUSG00000062312	-0.531186
																								ENSMUSG00000034152	0.228292	6.61658	11.047	0.000888329	0.00873981																			ENSMUSG00000018659	0.413401
																								ENSMUSG00000025795	0.218404	7.7206	11.045	0.000889286	0.00873981																			ENSMUSG00000037772	-0.515077
																								ENSMUSG00000014769	0.214384	6.6983	11.0449	0.000889337	0.00873981																			ENSMUSG00000054708	-0.675284
																								ENSMUSG00000066798	-0.262487	3.55036	11.0446	0.000889478	0.00873981																			ENSMUSG00000034382	-0.879102
																								ENSMUSG00000062906	-0.254	3.80009	11.0382	0.000892524	0.00876343																			ENSMUSG00000052415	0.938135
																								ENSMUSG00000019851	0.356422	6.94421	11.0345	0.000894339	0.00876487																			ENSMUSG00000033676	0.825175
																								ENSMUSG00000025481	1.00009	-0.429302	11.0342	0.000894462	0.00876487																			ENSMUSG00000032766	-0.502583
																								ENSMUSG00000030917	0.257101	4.64987	11.0334	0.000894848	0.00876487																			ENSMUSG00000006649	-0.680269
																								ENSMUSG00000068735	0.3741	5.26918	11.0324	0.000895354	0.00876487																			ENSMUSG00000048186	0.450316
																								ENSMUSG00000006998	0.232589	7.77508	11.0302	0.000896416	0.00876487																			ENSMUSG00000021196	-0.729674
																								ENSMUSG00000036585	0.349611	7.66091	11.0299	0.000896524	0.00876487																			ENSMUSG00000056999	0.427801
																								ENSMUSG00000074476	0.629753	1.18179	11.0246	0.0008991	0.00878376																			ENSMUSG00000064065	-0.565186
																								ENSMUSG00000034574	0.323866	6.93011	11.0167	0.000902967	0.00881524																			ENSMUSG00000061815	-0.983031
																								ENSMUSG00000027861	0.34779	9.84728	11.0077	0.000907318	0.00885079																			ENSMUSG00000042251	0.973579
																								ENSMUSG00000093904	0.199669	6.2252	11.0065	0.000907906	0.00885079																			ENSMUSG00000026972	-0.651891
																								ENSMUSG00000022122	-0.541146	5.20212	11.0011	0.00091058	0.00886493																			ENSMUSG00000030924	0.912353
																								ENSMUSG00000030894	-0.169758	6.15362	11.0009	0.000910656	0.00886493																			ENSMUSG00000029775	0.343037
																								ENSMUSG00000058076	0.291609	8.91262	10.9926	0.000914776	0.00889869																			ENSMUSG00000021490	0.521071
																								ENSMUSG00000031732	-0.346757	3.88538	10.985	0.000918514	0.00892869																			ENSMUSG00000035235	0.524431
																								ENSMUSG00000070705	0.283005	3.68485	10.9775	0.000922266	0.00895302																			ENSMUSG00000047181	-0.658092
																								ENSMUSG00000026814	-0.424664	8.04169	10.9769	0.000922535	0.00895302																			ENSMUSG00000036169	-0.670791
																								ENSMUSG00000041765	0.185502	4.94455	10.976	0.000922985	0.00895302																			ENSMUSG00000079260	1.1543
																								ENSMUSG00000062312	-0.378221	4.1982	10.9734	0.000924273	0.00895419																			ENSMUSG00000019539	-0.477134
																								ENSMUSG00000029199	0.269923	5.41242	10.9731	0.000924418	0.00895419																			ENSMUSG00000074064	0.595939
																								ENSMUSG00000033400	0.342815	8.33575	10.9663	0.000927859	0.00898115																			ENSMUSG00000008976	0.371766
																								ENSMUSG00000098188	-0.617648	2.23053	10.9644	0.000928788	0.00898377																			ENSMUSG00000028907	0.429479
																								ENSMUSG00000003131	-0.210475	5.86497	10.9618	0.000930072	0.00898679																			ENSMUSG00000070802	-0.694664
																								ENSMUSG00000060261	0.22164	7.71404	10.9612	0.000930417	0.00898679																			ENSMUSG00000021765	-0.974069
																								ENSMUSG00000026083	0.222784	6.98724	10.9574	0.000932304	0.00899196																			ENSMUSG00000025007	-0.716108
																								ENSMUSG00000029499	0.361716	5.06111	10.9562	0.000932905	0.00899196																			ENSMUSG00000029063	0.411749
																								ENSMUSG00000002847	0.508555	4.19718	10.9557	0.000933179	0.00899196																			ENSMUSG00000020386	0.369446
																								ENSMUSG00000003299	0.30719	6.28031	10.9549	0.000933588	0.00899196																			ENSMUSG00000035112	-0.601122
																								ENSMUSG00000025175	0.348581	4.10506	10.9524	0.000934801	0.0089973																			ENSMUSG00000027423	0.343631
																								ENSMUSG00000005823	-0.195397	5.1075	10.9496	0.000936217	0.00900457																			ENSMUSG00000024066	-0.882906
																								ENSMUSG00000025213	-0.798152	2.11455	10.9403	0.000940954	0.00904376																			ENSMUSG00000001435	-0.536498
																								ENSMUSG00000085272	-1.26465	7.63303	10.9351	0.000943596	0.00906277																			ENSMUSG00000060224	0.535509
																								ENSMUSG00000097993	-0.89965	1.44591	10.932	0.000945176	0.00907156																			ENSMUSG00000030483	1.96673
																								ENSMUSG00000025950	0.32063	6.30049	10.9281	0.00094716	0.00908421																			ENSMUSG00000032278	-0.594947
																								ENSMUSG00000031558	-0.700528	4.02493	10.9227	0.000949953	0.00910461																			ENSMUSG00000039988	0.462048
																								ENSMUSG00000033157	0.215406	4.42879	10.9191	0.000951779	0.009109																			ENSMUSG00000071637	-1.00622
																								ENSMUSG00000025900	-0.894665	3.39986	10.9175	0.000952621	0.009109																			ENSMUSG00000029602	-0.856687
																								ENSMUSG00000021432	-0.456716	3.34501	10.9161	0.000953319	0.009109																			ENSMUSG00000043831	0.522989
																								ENSMUSG00000032294	0.330839	9.85485	10.9152	0.000953776	0.009109																			ENSMUSG00000070427	-0.888437
																								ENSMUSG00000031574	-1.10062	1.0121	10.9149	0.000953924	0.009109																			ENSMUSG00000064326	-0.652051
																								ENSMUSG00000019795	0.206651	6.45505	10.9128	0.000955019	0.009109																			ENSMUSG00000030838	0.474156
																								ENSMUSG00000029486	0.286736	5.10748	10.9127	0.000955083	0.009109																			ENSMUSG00000035000	-0.596272
																								ENSMUSG00000020078	0.22053	6.49958	10.911	0.000955955	0.00911094																			ENSMUSG00000061136	0.304352
																								ENSMUSG00000020859	0.233515	7.95385	10.9081	0.000957435	0.00911868																			ENSMUSG00000029499	-0.866507
																								ENSMUSG00000091512	0.285338	5.54677	10.9051	0.000958984	0.00912707																			ENSMUSG00000028167	0.718117
																								ENSMUSG00000029413	-0.392099	4.67547	10.9011	0.000961096	0.00913806																			ENSMUSG00000032293	0.521828
																								ENSMUSG00000030541	0.43115	10.8255	10.9003	0.000961479	0.00913806																			ENSMUSG00000026825	-0.962628
																								ENSMUSG00000021951	0.299316	3.40983	10.8973	0.00096307	0.00914682																			ENSMUSG00000037788	-0.684567
																								ENSMUSG00000026766	0.323527	6.7341	10.8908	0.000966414	0.00917084																			ENSMUSG00000002731	-0.421402
																								ENSMUSG00000064354	0.423717	5.13354	10.8898	0.000966943	0.00917084																			ENSMUSG00000022751	0.463024
																								ENSMUSG00000074785	-0.566369	3.75712	10.878	0.000973135	0.00922316																			ENSMUSG00000057722	-0.598823
																								ENSMUSG00000027010	0.327866	7.6901	10.873	0.000975781	0.00924182																			ENSMUSG00000015652	-0.804596
																								ENSMUSG00000028943	-0.698092	3.29197	10.8716	0.000976503	0.00924224																			ENSMUSG00000006235	-0.817985
																								ENSMUSG00000062078	0.259412	9.31317	10.8674	0.000978699	0.0092566																			ENSMUSG00000062300	-0.555489
																								ENSMUSG00000010290	0.219483	5.23889	10.8652	0.000979856	0.00926113																			ENSMUSG00000022340	-0.932077
																								ENSMUSG00000024870	0.225543	7.21621	10.8573	0.000984087	0.00929469																			ENSMUSG00000025762	0.40483
																								ENSMUSG00000031351	-0.917873	2.8385	10.8527	0.000986496	0.00931099																			ENSMUSG00000030549	-0.633149
																								ENSMUSG00000036931	-0.773102	0.383799	10.8444	0.000990945	0.00934571																			ENSMUSG00000039041	0.443754
																								ENSMUSG00000041439	-0.346718	5.4897	10.8433	0.000991544	0.00934571																			ENSMUSG00000016637	-0.607475
																								ENSMUSG00000031934	-0.646446	1.93409	10.8399	0.00099338	0.00935656																			ENSMUSG00000026492	0.455306
																								ENSMUSG00000074971	-0.450452	3.50396	10.8376	0.000994607	0.00936165																			ENSMUSG00000060548	-1.01623
																								ENSMUSG00000065979	0.329967	5.98146	10.834	0.00099653	0.00937328																			ENSMUSG00000002320	0.375553
																								ENSMUSG00000024910	-1.08446	1.2592	10.8264	0.00100064	0.00940551																			ENSMUSG00000060675	-0.490188
																								ENSMUSG00000035027	0.234765	6.58289	10.8244	0.00100171	0.00940906																			ENSMUSG00000027376	-0.815242
																								ENSMUSG00000002109	-0.341083	3.15737	10.8206	0.00100375	0.0094217																			ENSMUSG00000021710	0.426394
																								ENSMUSG00000042828	0.497736	8.05353	10.8058	0.00101181	0.00948803																			ENSMUSG00000056209	0.87094
																								ENSMUSG00000000290	-0.550301	4.68317	10.8011	0.00101442	0.00948803																			ENSMUSG00000041263	-0.472694
																								ENSMUSG00000021838	0.401584	6.63227	10.8005	0.00101472	0.00948803																			ENSMUSG00000020634	0.617935
																								ENSMUSG00000039693	0.277354	3.51637	10.7996	0.00101523	0.00948803																			ENSMUSG00000005640	-0.679117
																								ENSMUSG00000028525	-0.250281	5.71619	10.7985	0.00101583	0.00948803																			ENSMUSG00000005362	0.406594
																								ENSMUSG00000024440	0.485339	4.68845	10.7972	0.00101653	0.00948803																			ENSMUSG00000030201	0.503083
																								ENSMUSG00000028700	0.193945	6.14867	10.7972	0.00101654	0.00948803																			ENSMUSG00000040855	0.499463
																								ENSMUSG00000045502	-1.25901	-0.406097	10.7971	0.00101661	0.00948803																			ENSMUSG00000022508	2.11528
																								ENSMUSG00000021457	-0.373997	6.09706	10.7962	0.00101707	0.00948803																			ENSMUSG00000010307	0.763144
																								ENSMUSG00000022551	0.347996	9.4451	10.7882	0.00102147	0.00951878																			ENSMUSG00000041075	-0.502459
																								ENSMUSG00000033578	-0.628624	2.21644	10.7876	0.00102184	0.00951878																			ENSMUSG00000053414	0.962186
																								ENSMUSG00000040385	0.167786	7.6791	10.7855	0.001023	0.00951878																			ENSMUSG00000005533	0.564297
																								ENSMUSG00000019558	0.463916	7.67628	10.7852	0.00102316	0.00951878																			ENSMUSG00000050071	-1.04898
																								ENSMUSG00000027782	0.177614	6.97335	10.7799	0.00102607	0.0095394																			ENSMUSG00000027864	-0.52547
																								ENSMUSG00000059173	-0.500453	3.68111	10.7681	0.00103264	0.0095881																			ENSMUSG00000051985	2.24772
																								ENSMUSG00000033174	0.345229	7.21503	10.768	0.00103272	0.0095881																			ENSMUSG00000055717	-0.855517
																								ENSMUSG00000030849	-0.854426	2.27914	10.7612	0.00103652	0.00961691																			ENSMUSG00000024270	-0.637463
																								ENSMUSG00000024065	-0.543856	3.68794	10.7594	0.0010375	0.0096194																			ENSMUSG00000048578	0.687139
																								ENSMUSG00000037243	-0.287081	3.50616	10.7485	0.00104366	0.00966773																			ENSMUSG00000038173	0.899959
																								ENSMUSG00000020307	0.332085	6.52377	10.7472	0.00104439	0.00966773																			ENSMUSG00000000305	-1.32598
																								ENSMUSG00000005354	0.226487	7.55778	10.7451	0.00104557	0.00966773																			ENSMUSG00000121584	-0.495741
																								ENSMUSG00000010097	-0.182571	6.43604	10.7446	0.00104585	0.00966773																			ENSMUSG00000029001	-0.588525
																								ENSMUSG00000015092	0.20503	6.54976	10.7439	0.00104625	0.00966773																			ENSMUSG00000029287	-0.488086
																								ENSMUSG00000038967	0.371052	8.47253	10.7413	0.00104772	0.00967477																			ENSMUSG00000026189	0.683467
																								ENSMUSG00000041426	0.353728	6.29958	10.7356	0.00105091	0.00969767																			ENSMUSG00000006641	-0.898596
																								ENSMUSG00000041632	0.340765	5.12966	10.7329	0.00105249	0.00970237																			ENSMUSG00000024683	0.364626
																								ENSMUSG00000067212	-0.588947	4.31778	10.7323	0.00105284	0.00970237																			ENSMUSG00000043702	0.489197
																								ENSMUSG00000037370	-0.497083	3.37205	10.7284	0.00105505	0.00971612																			ENSMUSG00000035021	0.835512
																								ENSMUSG00000031827	-0.383572	4.68662	10.7261	0.00105634	0.00971768																			ENSMUSG00000102752	-0.423459
																								ENSMUSG00000053398	-0.619455	1.99366	10.7256	0.00105664	0.00971768																			ENSMUSG00000022900	-0.651898
																								ENSMUSG00000022217	0.316413	4.50772	10.7227	0.00105829	0.00972626																			ENSMUSG00000059602	1.02278
																								ENSMUSG00000004558	0.330533	10.4253	10.7151	0.00106264	0.00975965																			ENSMUSG00000028036	-0.695348
																								ENSMUSG00000033059	0.466704	9.29663	10.713	0.00106383	0.00976408																			ENSMUSG00000036225	-0.531564
																								ENSMUSG00000020817	0.191644	6.13793	10.7085	0.00106644	0.0097814																			ENSMUSG00000020142	0.899574
																								ENSMUSG00000006435	0.58295	1.74838	10.7042	0.00106894	0.00978818																			ENSMUSG00000024978	0.594277
																								ENSMUSG00000032648	0.388338	10.0173	10.7037	0.00106923	0.00978818																			ENSMUSG00000000058	-0.52226
																								ENSMUSG00000022905	0.288209	7.14978	10.7035	0.00106933	0.00978818																			ENSMUSG00000028344	0.408441
																								ENSMUSG00000066637	0.34513	4.0961	10.7008	0.00107091	0.00979612																			ENSMUSG00000051065	0.599991
																								ENSMUSG00000005089	-0.802446	0.47211	10.6972	0.00107297	0.00980841																			ENSMUSG00000027456	-1.39783
																								ENSMUSG00000021368	0.284545	4.13664	10.6958	0.00107381	0.00980952																			ENSMUSG00000038740	0.483243
																								ENSMUSG00000038884	-0.425224	3.74787	10.6873	0.00107874	0.00984795																			ENSMUSG00000027202	-0.477289
																								ENSMUSG00000038239	0.415129	10.0878	10.6843	0.00108047	0.00985708																			ENSMUSG00000051041	-0.752158
																								ENSMUSG00000028476	-0.518643	4.39819	10.6794	0.00108336	0.00987685																			ENSMUSG00000036202	0.529898
																								ENSMUSG00000092021	-1.41042	0.22431	10.6765	0.00108508	0.00988597																			ENSMUSG00000002329	0.389735
																								ENSMUSG00000030598	-0.684711	1.74923	10.6609	0.00109424	0.00996277																			ENSMUSG00000030717	-0.727422
																								ENSMUSG00000051853	-0.247475	5.6048	10.659	0.00109534	0.00996612																			ENSMUSG00000035403	-0.881222
																								ENSMUSG00000022186	0.424463	10.3925	10.6577	0.00109611	0.00996652																			ENSMUSG00000020954	0.504569
																								ENSMUSG00000058806	-0.629914	1.60665	10.6488	0.0011014	0.0100051																			ENSMUSG00000003546	0.376924
																								ENSMUSG00000025326	0.233129	6.97525	10.6481	0.00110182	0.0100051																			ENSMUSG00000038534	-0.586178
																								ENSMUSG00000042642	0.303538	5.3434	10.6446	0.00110394	0.0100176																			ENSMUSG00000027671	0.367078
																								ENSMUSG00000036860	0.269859	5.08299	10.631	0.00111207	0.0100799																			ENSMUSG00000031007	-0.382381
																								ENSMUSG00000073988	-0.781812	0.0681048	10.6307	0.00111228	0.0100799																			ENSMUSG00000027030	-0.519366
																								ENSMUSG00000028583	-0.714209	4.00628	10.6286	0.00111351	0.0100844																			ENSMUSG00000028927	-1.09938
																								ENSMUSG00000028456	-0.521319	5.31331	10.6208	0.00111822	0.0101183																			ENSMUSG00000027562	-0.581176
																								ENSMUSG00000067365	-0.267618	3.76668	10.62	0.00111873	0.0101183																			ENSMUSG00000067656	-2.88845
																								ENSMUSG00000032435	0.363976	6.17302	10.6182	0.00111982	0.0101214																			ENSMUSG00000030731	-0.774775
																								ENSMUSG00000031861	-0.821803	1.01398	10.615	0.00112172	0.0101319																			ENSMUSG00000028664	-0.707282
																								ENSMUSG00000045095	-0.207293	4.65427	10.6075	0.0011263	0.0101493																			ENSMUSG00000036381	-0.680111
																								ENSMUSG00000025278	-0.342865	6.49546	10.6075	0.00112632	0.0101493																			ENSMUSG00000020451	-0.336257
																								ENSMUSG00000006005	0.210852	7.50128	10.6071	0.00112652	0.0101493																			ENSMUSG00000045414	-0.523334
																								ENSMUSG00000036104	0.184428	6.26691	10.607	0.00112663	0.0101493																			ENSMUSG00000037419	-0.440764
																								ENSMUSG00000022868	-1.05383	4.27678	10.6035	0.00112872	0.0101586																			ENSMUSG00000026037	0.373082
																								ENSMUSG00000031489	-2.32794	1.74189	10.6028	0.00112915	0.0101586																			ENSMUSG00000038168	-0.958357
																								ENSMUSG00000023393	-0.866765	1.56199	10.6007	0.00113042	0.0101634																			ENSMUSG00000045690	1.03793
																								ENSMUSG00000041607	-0.566388	4.41757	10.5967	0.00113292	0.0101708																			ENSMUSG00000011382	-0.84599
																								ENSMUSG00000040675	-0.686709	0.842246	10.5966	0.00113297	0.0101708																			ENSMUSG00000062157	-0.639844
																								ENSMUSG00000022253	0.236227	6.32042	10.5954	0.00113367	0.0101708																			ENSMUSG00000003863	-0.936764
																								ENSMUSG00000051669	-0.41283	3.66574	10.5945	0.00113423	0.0101708																			ENSMUSG00000018500	-0.94719
																								ENSMUSG00000029634	0.183528	5.8044	10.5853	0.00113991	0.010215																			ENSMUSG00000026670	0.671403
																								ENSMUSG00000025932	-0.750471	1.24138	10.5807	0.00114273	0.0102336																			ENSMUSG00000025574	0.909454
																								ENSMUSG00000031641	0.355585	5.03505	10.5793	0.00114362	0.0102348																			ENSMUSG00000079497	-0.833263
																								ENSMUSG00000032202	-0.568228	3.34445	10.5747	0.00114644	0.0102533																			ENSMUSG00000002428	0.438206
																								ENSMUSG00000025521	0.273655	3.87301	10.572	0.00114814	0.0102576																			ENSMUSG00000031826	0.390247
																								ENSMUSG00000024953	0.302968	7.96203	10.5715	0.00114842	0.0102576																			ENSMUSG00000021994	-0.439203
																								ENSMUSG00000050043	0.266809	5.80473	10.5702	0.00114928	0.0102586																			ENSMUSG00000054520	1.39588
																								ENSMUSG00000031849	-0.908384	4.1539	10.5687	0.00115022	0.0102602																			ENSMUSG00000055373	0.861302
																								ENSMUSG00000039016	0.228903	6.21993	10.5633	0.00115352	0.010283																			ENSMUSG00000026478	-0.424496
																								ENSMUSG00000033021	-0.206065	5.25942	10.5564	0.00115789	0.0103152																			ENSMUSG00000078486	-0.658847
																								ENSMUSG00000047040	-0.892554	1.09025	10.555	0.00115874	0.0103161																			ENSMUSG00000078487	1.05736
																								ENSMUSG00000046230	0.321614	5.82667	10.5361	0.00117067	0.0104154																			ENSMUSG00000063430	-0.717129
																								ENSMUSG00000039768	0.332035	6.05393	10.5349	0.00117142	0.0104154																			ENSMUSG00000026566	-0.563188
																								ENSMUSG00000022974	-0.164052	5.31759	10.5278	0.00117589	0.0104483																			ENSMUSG00000020439	-0.408286
																								ENSMUSG00000010277	0.319665	9.00428	10.5218	0.00117976	0.0104759																			ENSMUSG00000025545	0.4073
																								ENSMUSG00000001349	-0.884121	2.41527	10.5184	0.00118192	0.0104882																			ENSMUSG00000003378	-0.663167
																								ENSMUSG00000024130	-0.258294	5.41378	10.5166	0.00118307	0.0104916																			ENSMUSG00000051000	-0.537586
																								ENSMUSG00000024210	0.667675	2.97143	10.5146	0.00118432	0.0104959																			ENSMUSG00000022773	-0.947467
																								ENSMUSG00000005716	-1.08245	-0.12509	10.5041	0.00119108	0.0105489																			ENSMUSG00000021612	-0.648449
																								ENSMUSG00000015961	-0.348542	4.10491	10.5022	0.00119231	0.0105523																			ENSMUSG00000024892	0.626849
																								ENSMUSG00000031328	-0.390304	8.32826	10.5011	0.00119302	0.0105523																			ENSMUSG00000001482	0.670864
																								ENSMUSG00000028577	0.257387	5.94928	10.4976	0.00119533	0.0105601																			ENSMUSG00000024811	0.401957
																								ENSMUSG00000028292	0.210056	4.24434	10.4974	0.00119544	0.0105601																			ENSMUSG00000028184	0.574092
																								ENSMUSG00000056394	-0.3813	2.33766	10.4807	0.00120626	0.0106488																			ENSMUSG00000039960	-0.774381
																								ENSMUSG00000027088	0.251113	4.89602	10.4738	0.00121078	0.0106774																			ENSMUSG00000033813	0.399058
																								ENSMUSG00000040706	-0.83597	-0.15523	10.4734	0.00121107	0.0106774																			ENSMUSG00000069456	-0.614991
																								ENSMUSG00000026248	0.271828	5.49516	10.47	0.00121326	0.0106898																			ENSMUSG00000049721	-0.642142
																								ENSMUSG00000073402	-1.16416	0.0876983	10.4668	0.00121537	0.010693																			ENSMUSG00000032523	-0.967281
																								ENSMUSG00000023931	-0.845258	-0.517126	10.4664	0.00121567	0.010693																			ENSMUSG00000030105	0.33762
																								ENSMUSG00000037349	0.282593	3.82929	10.4645	0.00121692	0.010693																			ENSMUSG00000039628	-0.782754
																								ENSMUSG00000026586	0.323152	5.7124	10.4639	0.00121731	0.010693																			ENSMUSG00000115987	-0.33993
																								ENSMUSG00000020577	0.182521	5.548	10.4627	0.00121811	0.010693																			ENSMUSG00000041120	-0.709085
																								ENSMUSG00000027405	-0.17068	4.8153	10.4615	0.00121886	0.010693																			ENSMUSG00000020089	-0.771984
																								ENSMUSG00000020717	-0.322177	7.77383	10.4612	0.0012191	0.010693																			ENSMUSG00000030963	-0.472018
																								ENSMUSG00000054863	0.332685	2.70839	10.449	0.00122713	0.0107565																			ENSMUSG00000037661	-0.670052
																								ENSMUSG00000051323	0.434513	3.81347	10.4447	0.00123	0.0107747																			ENSMUSG00000024827	-1.2237
																								ENSMUSG00000004383	0.37485	5.95449	10.442	0.00123182	0.0107838																			ENSMUSG00000002105	-0.458805
																								ENSMUSG00000037351	0.164339	6.7867	10.4398	0.00123329	0.0107897																			ENSMUSG00000029797	-1.22032
																								ENSMUSG00000021186	-0.549465	5.36619	10.4362	0.00123571	0.0108039																			ENSMUSG00000029190	0.475426
																								ENSMUSG00000024592	0.289675	4.33482	10.4344	0.00123688	0.0108073																			ENSMUSG00000029361	-0.941055
																								ENSMUSG00000116138	0.335558	5.11111	10.4324	0.00123826	0.0108124																			ENSMUSG00000021936	0.445311
																								ENSMUSG00000033845	0.258482	5.75248	10.4252	0.0012431	0.0108343																			ENSMUSG00000036256	-0.423583
																								ENSMUSG00000028464	-0.608158	5.39625	10.4247	0.00124341	0.0108343																			ENSMUSG00000028436	0.496543
																								ENSMUSG00000034209	0.714528	1.84095	10.4246	0.00124345	0.0108343																			ENSMUSG00000039981	-1.12148
																								ENSMUSG00000027335	0.822353	1.71577	10.4239	0.00124394	0.0108343																			ENSMUSG00000086316	-0.582367
																								ENSMUSG00000032114	-0.814578	5.51409	10.4212	0.00124578	0.0108418																			ENSMUSG00000098132	-0.863595
																								ENSMUSG00000040616	-0.325101	4.13445	10.4203	0.00124639	0.0108418																			ENSMUSG00000025869	0.481606
																								ENSMUSG00000061815	-0.847271	1.28202	10.4181	0.0012479	0.0108479																			ENSMUSG00000027455	0.301586
																								ENSMUSG00000002949	0.293623	6.47618	10.4164	0.001249	0.0108506																			ENSMUSG00000037686	0.69226
																								ENSMUSG00000046709	0.388607	4.07379	10.4151	0.00124991	0.0108516																			ENSMUSG00000028544	-0.840256
																								ENSMUSG00000026638	-0.736413	2.2447	10.4133	0.00125111	0.0108551																			ENSMUSG00000022415	-0.588946
																								ENSMUSG00000028603	0.222552	8.08929	10.4102	0.00125321	0.0108582																			ENSMUSG00000058672	-0.724541
																								ENSMUSG00000064264	0.476759	2.50967	10.4096	0.00125359	0.0108582																			ENSMUSG00000067377	-0.68455
																								ENSMUSG00000041828	-0.409665	6.91179	10.4077	0.00125492	0.0108582																			ENSMUSG00000028699	-0.622887
																								ENSMUSG00000039347	-0.368554	4.34678	10.407	0.00125539	0.0108582																			ENSMUSG00000039063	-0.456787
																								ENSMUSG00000027962	-0.507393	5.36324	10.4069	0.00125544	0.0108582																			ENSMUSG00000021111	0.443647
																								ENSMUSG00000027575	-0.18058	5.49919	10.401	0.00125944	0.0108736																			ENSMUSG00000031217	-0.370951
																								ENSMUSG00000032044	0.228264	4.0031	10.4008	0.0012596	0.0108736																			ENSMUSG00000014547	0.597421
																								ENSMUSG00000026463	-0.473121	5.80134	10.3997	0.00126037	0.0108736																			ENSMUSG00000040028	0.491563
																								ENSMUSG00000071540	0.440579	6.49508	10.3985	0.0012612	0.0108736																			ENSMUSG00000027315	-0.361281
																								ENSMUSG00000061048	-1.17869	2.4135	10.3972	0.00126208	0.0108736																			ENSMUSG00000021265	-0.609802
																								ENSMUSG00000026259	-1.16447	-0.272606	10.3963	0.00126271	0.0108736																			ENSMUSG00000016028	-0.689764
																								ENSMUSG00000004267	-0.54094	2.63208	10.3961	0.0012628	0.0108736																			ENSMUSG00000094686	-1.1298
																								ENSMUSG00000001018	0.203692	5.50009	10.3834	0.00127152	0.0109418																			ENSMUSG00000024150	0.514496
																								ENSMUSG00000040945	-0.176594	5.18059	10.379	0.00127457	0.0109611																			ENSMUSG00000037300	0.399641
																								ENSMUSG00000021061	0.328952	8.34852	10.3734	0.00127847	0.0109877																			ENSMUSG00000078995	-0.92435
																								ENSMUSG00000047454	0.266886	4.8416	10.371	0.0012801	0.0109948																			ENSMUSG00000019853	-1.01791
																								ENSMUSG00000020682	-0.566329	2.36519	10.369	0.00128147	0.0109996																			ENSMUSG00000028525	-0.733521
																								ENSMUSG00000036062	0.806513	3.52686	10.3609	0.00128712	0.0110337																			ENSMUSG00000047037	-0.441619
																								ENSMUSG00000034586	-0.609684	3.70648	10.3596	0.001288	0.0110337																			ENSMUSG00000063590	3.67709
																								ENSMUSG00000021669	0.176714	5.95183	10.359	0.00128844	0.0110337																			ENSMUSG00000054027	-0.573952
																								ENSMUSG00000026455	0.171574	4.91062	10.3587	0.00128866	0.0110337																			ENSMUSG00000029432	-0.326586
																								ENSMUSG00000028974	0.42903	5.00362	10.3474	0.00129656	0.0110886																			ENSMUSG00000023913	-0.791032
																								ENSMUSG00000043015	-0.711332	2.53487	10.3472	0.0012967	0.0110886																			ENSMUSG00000022724	0.386721
																								ENSMUSG00000031791	0.343579	8.60587	10.3413	0.00130084	0.011117																			ENSMUSG00000029591	-0.983974
																								ENSMUSG00000036246	-0.371179	3.82198	10.3359	0.00130469	0.011143																			ENSMUSG00000046873	0.345802
																								ENSMUSG00000020864	0.277134	7.40041	10.3302	0.00130872	0.0111626																			ENSMUSG00000045962	-0.431426
																								ENSMUSG00000029123	-0.92342	1.92162	10.3295	0.00130918	0.0111626																			ENSMUSG00000026669	0.998659
																								ENSMUSG00000032053	-1.24556	1.83163	10.3292	0.00130945	0.0111626																			ENSMUSG00000069237	0.321036
																								ENSMUSG00000034813	-0.743615	0.143015	10.3259	0.00131174	0.0111752																			ENSMUSG00000037016	-0.82938
																								ENSMUSG00000021096	0.222852	7.25047	10.324	0.0013131	0.0111797																			ENSMUSG00000038700	-0.691642
																								ENSMUSG00000039067	0.214486	6.56349	10.3204	0.00131565	0.0111945																			ENSMUSG00000027082	-1.09065
																								ENSMUSG00000044949	-0.405089	1.97486	10.3172	0.00131797	0.0112072																			ENSMUSG00000030257	-0.538734
																								ENSMUSG00000001642	0.342718	6.94009	10.3158	0.00131895	0.0112086																			ENSMUSG00000024525	-0.584004
																								ENSMUSG00000032261	-0.488033	3.5448	10.3139	0.00132035	0.01121																			ENSMUSG00000022849	0.487838
																								ENSMUSG00000033669	-0.458287	1.48802	10.3128	0.00132113	0.01121																			ENSMUSG00000019979	0.955213
																								ENSMUSG00000063455	-0.452732	2.35881	10.3121	0.00132157	0.01121																			ENSMUSG00000038765	-0.824189
																								ENSMUSG00000024387	0.183847	5.78963	10.3057	0.00132617	0.011242																			ENSMUSG00000031402	0.495105
																								ENSMUSG00000027424	-0.879487	4.4416	10.3026	0.00132843	0.0112541																			ENSMUSG00000022772	0.450494
																								ENSMUSG00000061461	0.229198	6.12254	10.3008	0.00132973	0.0112582																			ENSMUSG00000003134	-0.547623
																								ENSMUSG00000030826	0.296651	6.77143	10.2988	0.00133119	0.0112635																			ENSMUSG00000028247	0.449414
																								ENSMUSG00000018999	-0.255334	4.28974	10.2855	0.00134077	0.0113375																			ENSMUSG00000066152	-0.613642
																								ENSMUSG00000052760	-1.43226	0.527911	10.2773	0.00134673	0.0113729																			ENSMUSG00000037826	-0.523153
																								ENSMUSG00000025145	-0.262522	3.86365	10.277	0.00134698	0.0113729																			ENSMUSG00000038936	-0.376076
																								ENSMUSG00000027661	-0.576943	2.26746	10.2764	0.00134745	0.0113729																			ENSMUSG00000042672	2.41203
																								ENSMUSG00000035992	0.238181	6.41368	10.2748	0.00134861	0.0113756																			ENSMUSG00000024712	-0.46436
																								ENSMUSG00000034266	-0.722914	0.26323	10.2649	0.00135585	0.0114297																			ENSMUSG00000041889	-0.953278
																								ENSMUSG00000026414	0.335145	12.8309	10.2583	0.00136072	0.0114637																			ENSMUSG00000037369	-0.516396
																								ENSMUSG00000040016	-1.57324	0.80899	10.2558	0.00136257	0.0114722																			ENSMUSG00000035969	-0.513086
																								ENSMUSG00000000399	0.339819	8.74934	10.2529	0.00136473	0.0114771																			ENSMUSG00000005102	-0.474959
																								ENSMUSG00000030275	-0.170112	6.67937	10.2527	0.00136484	0.0114771																			ENSMUSG00000075705	0.797901
																								ENSMUSG00000026172	0.275179	4.61819	10.2512	0.00136598	0.0114796																			ENSMUSG00000078532	-1.91343
																								ENSMUSG00000053453	0.217293	5.58535	10.244	0.00137131	0.0115173																			ENSMUSG00000054855	-1.01059
																								ENSMUSG00000015016	0.317511	4.77926	10.2415	0.00137316	0.0115258																			ENSMUSG00000028497	-0.606981
																								ENSMUSG00000018417	0.41145	4.90695	10.2383	0.00137556	0.0115384																			ENSMUSG00000021591	0.668494
																								ENSMUSG00000071078	-0.332222	3.37169	10.2372	0.00137636	0.0115384																			ENSMUSG00000018654	1.21508
																								ENSMUSG00000055301	-1.36803	0.574643	10.2352	0.00137783	0.0115437																			ENSMUSG00000025027	-0.451332
																								ENSMUSG00000025141	0.359731	5.47588	10.2305	0.00138134	0.011566																			ENSMUSG00000006373	-0.643399
																								ENSMUSG00000001166	-0.66212	0.250149	10.2219	0.0013878	0.0116101																			ENSMUSG00000022912	-0.44997
																								ENSMUSG00000050440	-1.08683	3.4134	10.2213	0.00138831	0.0116101																			ENSMUSG00000027624	-0.347751
																								ENSMUSG00000050379	-0.428369	3.60175	10.22	0.00138925	0.0116109																			ENSMUSG00000021697	0.932404
																								ENSMUSG00000027602	0.286196	8.32002	10.2167	0.00139178	0.0116248																			ENSMUSG00000033174	-0.760647
																								ENSMUSG00000062822	-0.240906	4.90133	10.2134	0.00139424	0.0116383																			ENSMUSG00000061048	-0.714546
																								ENSMUSG00000023156	0.217381	5.05715	10.2115	0.00139565	0.011643																			ENSMUSG00000030990	-0.411498
																								ENSMUSG00000031482	0.234283	4.15528	10.2098	0.00139698	0.0116469																			ENSMUSG00000047996	-0.619545
																								ENSMUSG00000037406	-0.634623	2.02058	10.2081	0.00139823	0.0116502																			ENSMUSG00000037278	-0.745537
																								ENSMUSG00000040428	-0.555039	2.73611	10.1971	0.00140662	0.0117129																			ENSMUSG00000032128	-0.642024
																								ENSMUSG00000038462	0.322521	9.62435	10.1869	0.00141441	0.0117707																			ENSMUSG00000032050	0.361505
																								ENSMUSG00000057092	-1.10427	1.96398	10.1837	0.00141688	0.011784																			ENSMUSG00000054702	0.559109
																								ENSMUSG00000023456	0.340363	9.34578	10.174	0.00142435	0.0118389																			ENSMUSG00000047045	-0.344047
																								ENSMUSG00000033488	-0.301043	3.32293	10.171	0.00142665	0.0118508																			ENSMUSG00000019866	0.700808
																								ENSMUSG00000018919	-1.13098	2.37951	10.1667	0.00143001	0.0118715																			ENSMUSG00000044876	0.535302
																								ENSMUSG00000043241	0.167572	5.35895	10.1639	0.00143217	0.0118822																			ENSMUSG00000044134	-0.48897
																								ENSMUSG00000002489	-0.409207	3.3857	10.16	0.00143517	0.0118999																			ENSMUSG00000056770	0.350752
																								ENSMUSG00000002395	0.233605	6.14767	10.1579	0.00143684	0.0119065																			ENSMUSG00000028967	0.786362
																								ENSMUSG00000041729	0.340678	3.90816	10.145	0.00144692	0.0119827																			ENSMUSG00000039485	-0.482475
																								ENSMUSG00000029563	-0.481056	2.67784	10.141	0.00145006	0.0120015																			ENSMUSG00000039065	0.523196
																								ENSMUSG00000002100	0.554587	11.743	10.139	0.00145164	0.0120072																			ENSMUSG00000003271	-0.856024
																								ENSMUSG00000018770	0.296901	10.1458	10.1303	0.0014585	0.0120567																			ENSMUSG00000068874	0.521454
																								ENSMUSG00000028932	0.226133	6.48199	10.1265	0.00146156	0.0120747																			ENSMUSG00000047030	0.495933
																								ENSMUSG00000020124	0.20689	6.4891	10.1176	0.00146861	0.0121256																			ENSMUSG00000052026	-1.34159
																								ENSMUSG00000045441	-1.11966	1.4673	10.1156	0.00147022	0.0121315																			ENSMUSG00000032640	0.553516
																								ENSMUSG00000071648	0.513434	4.23308	10.1019	0.00148113	0.0122142																			ENSMUSG00000058704	0.318108
																								ENSMUSG00000022052	0.178267	5.58394	10.1003	0.00148247	0.0122178																			ENSMUSG00000085683	-0.736814
																								ENSMUSG00000040713	0.379239	6.82204	10.0983	0.00148403	0.0122225																			ENSMUSG00000039601	-0.666622
																								ENSMUSG00000029254	-1.07394	1.20071	10.0974	0.00148482	0.0122225																			ENSMUSG00000042082	0.785444
																								ENSMUSG00000028426	0.203302	7.01103	10.0852	0.00149463	0.0122958																			ENSMUSG00000025934	-0.906302
																								ENSMUSG00000005057	-1.03344	0.812822	10.0833	0.00149623	0.0123015																			ENSMUSG00000026295	-1.03962
																								ENSMUSG00000090035	-0.424147	3.29634	10.0798	0.00149902	0.0123171																			ENSMUSG00000035247	0.518431
																								ENSMUSG00000024580	0.265569	4.5153	10.0674	0.00150914	0.0123928																			ENSMUSG00000027796	-0.687775
																								ENSMUSG00000036678	-0.219295	3.55422	10.0646	0.00151149	0.0124046																			ENSMUSG00000026939	-0.644108
																								ENSMUSG00000030483	1.41813	2.64068	10.0625	0.00151322	0.0124113																			ENSMUSG00000049690	-0.70834
																								ENSMUSG00000058070	0.267195	6.51022	10.0478	0.00152531	0.012503																			ENSMUSG00000028559	0.688824
																								ENSMUSG00000037606	-0.329342	4.76442	10.0465	0.0015264	0.0125044																			ENSMUSG00000029392	-0.384075
																								ENSMUSG00000002346	0.311311	6.51683	10.0439	0.0015285	0.0125141																			ENSMUSG00000024485	-0.777426
																								ENSMUSG00000031392	0.165174	6.58149	10.0415	0.00153053	0.0125232																			ENSMUSG00000059149	-0.57682
																								ENSMUSG00000008496	-0.807582	1.87945	10.0386	0.0015329	0.0125351																			ENSMUSG00000030615	0.363126
																								ENSMUSG00000060212	-1.04445	0.711332	10.0357	0.00153534	0.0125373																			ENSMUSG00000035011	0.354364
																								ENSMUSG00000025068	0.43932	6.47549	10.0356	0.00153541	0.0125373																			ENSMUSG00000032086	-0.323848
																								ENSMUSG00000057666	0.394399	10.9265	10.035	0.00153592	0.0125373																			ENSMUSG00000028614	-0.461765
																								ENSMUSG00000049241	-1.47905	0.0701679	10.0274	0.00154231	0.0125819																			ENSMUSG00000074899	-0.924594
																								ENSMUSG00000022096	-0.433081	5.0616	10.0246	0.00154466	0.0125935																			ENSMUSG00000021359	-0.680215
																								ENSMUSG00000024683	0.234052	5.26858	10.0176	0.00155055	0.0126339																			ENSMUSG00000026602	-0.482139
																								ENSMUSG00000064370	0.334227	14.5033	10.015	0.0015527	0.012641																			ENSMUSG00000019810	0.789094
																								ENSMUSG00000053898	0.404843	9.8792	10.0142	0.00155339	0.012641																			ENSMUSG00000025613	0.335479
																								ENSMUSG00000017677	-0.279411	5.33455	10.0121	0.00155515	0.012641																			ENSMUSG00000029359	-0.777215
																								ENSMUSG00000021737	0.20726	5.90984	10.0118	0.00155543	0.012641																			ENSMUSG00000074500	-0.899954
																								ENSMUSG00000034206	0.911018	2.6799	10.011	0.00155604	0.012641																			ENSMUSG00000037361	0.363689
																								ENSMUSG00000010609	-0.25135	4.00449	10.0099	0.00155698	0.0126411																			ENSMUSG00000041313	-0.730307
																								ENSMUSG00000038250	0.19252	4.97898	10.0008	0.00156476	0.0126967																			ENSMUSG00000025981	0.602152
																								ENSMUSG00000019832	-0.604208	2.17339	9.99465	0.00156995	0.0127242																			ENSMUSG00000026219	0.370608
																								ENSMUSG00000034932	0.253917	5.14756	9.99458	0.00157002	0.0127242																			ENSMUSG00000040009	-0.589908
																								ENSMUSG00000028664	-0.715457	0.457363	9.99312	0.00157127	0.0127268																			ENSMUSG00000047238	-0.549362
																								ENSMUSG00000024570	0.253733	4.83144	9.98997	0.00157396	0.0127369																			ENSMUSG00000058589	1.91278
																								ENSMUSG00000003184	-0.189333	5.16873	9.98945	0.0015744	0.0127369																			ENSMUSG00000062397	0.536663
																								ENSMUSG00000027296	-0.691513	0.559134	9.98838	0.00157531	0.0127369																			ENSMUSG00000047036	0.568514
																								ENSMUSG00000022816	-0.421024	7.33285	9.98558	0.0015777	0.0127487																			ENSMUSG00000038240	0.381798
																								ENSMUSG00000024120	0.41771	7.37605	9.98267	0.0015802	0.0127613																			ENSMUSG00000029578	0.325155
																								ENSMUSG00000054641	-0.765598	5.12129	9.97864	0.00158367	0.0127781																			ENSMUSG00000079494	2.1482
																								ENSMUSG00000026872	-0.414795	5.73144	9.97525	0.00158658	0.0127781																			ENSMUSG00000033880	-0.556393
																								ENSMUSG00000036450	0.308159	7.01731	9.97484	0.00158693	0.0127781																			ENSMUSG00000030968	-0.836693
																								ENSMUSG00000020386	0.228752	6.44125	9.97276	0.00158874	0.0127781																			ENSMUSG00000051439	-0.900339
																								ENSMUSG00000031913	0.182719	5.94391	9.97261	0.00158886	0.0127781																			ENSMUSG00000022314	0.427106
																								ENSMUSG00000029128	0.212309	6.39175	9.97255	0.00158892	0.0127781																			ENSMUSG00000073414	-1.27275
																								ENSMUSG00000028134	-0.243105	4.85352	9.97163	0.0015897	0.0127781																			ENSMUSG00000028716	-0.359434
																								ENSMUSG00000113902	0.24708	7.57264	9.97151	0.00158981	0.0127781																			ENSMUSG00000034532	-1.02995
																								ENSMUSG00000004364	0.217581	7.25755	9.97047	0.00159071	0.0127781																			ENSMUSG00000030513	-0.556878
																								ENSMUSG00000031119	-0.261695	4.83008	9.96842	0.00159248	0.0127848																			ENSMUSG00000038578	-0.705401
																								ENSMUSG00000027195	-0.246988	4.95165	9.96024	0.00159957	0.0128342																			ENSMUSG00000048329	-0.896152
																								ENSMUSG00000024937	0.286102	8.45095	9.95812	0.00160142	0.0128415																			ENSMUSG00000037902	-0.655771
																								ENSMUSG00000003934	0.550985	6.75687	9.95314	0.00160575	0.0128686																			ENSMUSG00000031877	-0.883097
																								ENSMUSG00000030786	-0.72032	2.25695	9.95155	0.00160714	0.0128722																			ENSMUSG00000035441	-0.412737
																								ENSMUSG00000070283	0.31796	4.74933	9.94772	0.00161049	0.0128915																			ENSMUSG00000029111	0.467642
																								ENSMUSG00000044365	-0.504117	1.94494	9.94419	0.00161358	0.0129086																			ENSMUSG00000033453	1.19118
																								ENSMUSG00000006373	-0.365947	5.23184	9.94242	0.00161513	0.0129132																			ENSMUSG00000003135	0.376096
																								ENSMUSG00000020708	0.209756	6.41623	9.94048	0.00161684	0.0129132																			ENSMUSG00000037031	-0.494704
																								ENSMUSG00000035142	0.298605	3.88034	9.93971	0.00161751	0.0129132																			ENSMUSG00000039367	0.355012
																								ENSMUSG00000020821	0.302828	9.63248	9.93923	0.00161793	0.0129132																			ENSMUSG00000037885	0.749501
																								ENSMUSG00000002820	0.277933	5.67598	9.93471	0.00162191	0.0129373																			ENSMUSG00000073293	-1.18752
																								ENSMUSG00000026409	0.597108	6.88406	9.93009	0.00162599	0.0129566																			ENSMUSG00000034297	0.588246
																								ENSMUSG00000015053	-0.360743	4.37623	9.92889	0.00162704	0.0129566																			ENSMUSG00000022285	0.674952
																								ENSMUSG00000049439	-0.295561	4.01389	9.92875	0.00162717	0.0129566																			ENSMUSG00000057236	0.474184
																								ENSMUSG00000040848	-0.304848	5.80309	9.92499	0.0016305	0.0129755																			ENSMUSG00000025979	0.378013
																								ENSMUSG00000075012	-0.802073	-0.477885	9.91133	0.00164265	0.0130646																			ENSMUSG00000015094	-0.419305
																								ENSMUSG00000068227	-0.846472	2.02105	9.90955	0.00164423	0.0130665																			ENSMUSG00000047844	-1.23185
																								ENSMUSG00000031425	-0.386622	3.73875	9.90891	0.00164481	0.0130665																			ENSMUSG00000022255	0.318955
																								ENSMUSG00000035199	0.166509	6.84795	9.90002	0.00165277	0.0131222																			ENSMUSG00000020707	0.509334
																								ENSMUSG00000024359	0.317354	9.53178	9.89129	0.00166063	0.0131769																			ENSMUSG00000035232	0.757295
																								ENSMUSG00000028937	0.288279	6.16494	9.88372	0.00166748	0.0132235																			ENSMUSG00000030922	0.545815
																								ENSMUSG00000047632	-0.448737	0.931563	9.88194	0.00166909	0.0132287																			ENSMUSG00000062488	-1.0845
																								ENSMUSG00000024981	-0.303895	4.99911	9.87629	0.00167422	0.0132616																			ENSMUSG00000039000	0.314499
																								ENSMUSG00000103409	0.329181	5.83848	9.87186	0.00167826	0.0132859																			ENSMUSG00000020044	0.690733
																								ENSMUSG00000024013	-0.597497	2.58219	9.86742	0.00168231	0.0133103																			ENSMUSG00000030214	-0.856888
																								ENSMUSG00000021456	0.648778	3.12107	9.8602	0.00168893	0.0133549																			ENSMUSG00000032066	1.07174
																								ENSMUSG00000029993	0.297636	5.17919	9.8575	0.00169141	0.0133667																			ENSMUSG00000000805	1.14455
																								ENSMUSG00000031093	-0.427127	3.76439	9.84643	0.00170161	0.0134396																			ENSMUSG00000040029	0.386523
																								ENSMUSG00000056498	-0.506001	2.54754	9.84385	0.00170401	0.0134457																			ENSMUSG00000031665	-0.518434
																								ENSMUSG00000020524	1.3453	-0.0869207	9.84346	0.00170436	0.0134457																			ENSMUSG00000021822	-0.745957
																								ENSMUSG00000024008	-1.04979	2.73932	9.84102	0.00170663	0.013454																			ENSMUSG00000040808	-0.733226
																								ENSMUSG00000031987	0.291239	8.72572	9.84021	0.00170738	0.013454																			ENSMUSG00000032285	0.802655
																								ENSMUSG00000030610	0.294907	3.93992	9.83546	0.00171179	0.013481																			ENSMUSG00000034825	-0.908749
																								ENSMUSG00000071650	-0.167724	6.72277	9.83139	0.00171559	0.0135031																			ENSMUSG00000023882	-0.50467
																								ENSMUSG00000029309	0.230996	8.55337	9.82747	0.00171925	0.0135241																			ENSMUSG00000040562	-0.827819
																								ENSMUSG00000036672	-0.354068	2.84512	9.82428	0.00172223	0.0135398																			ENSMUSG00000049686	-0.629041
																								ENSMUSG00000051346	0.369288	4.6638	9.82059	0.00172569	0.0135592																			ENSMUSG00000036779	0.371243
																								ENSMUSG00000038429	0.195062	6.53894	9.81717	0.0017289	0.0135765																			ENSMUSG00000060402	-0.808567
																								ENSMUSG00000036446	-0.451522	7.07135	9.81577	0.00173022	0.0135772																			ENSMUSG00000026914	0.430206
																								ENSMUSG00000037278	-0.367419	2.21974	9.81339	0.00173246	0.0135772																			ENSMUSG00000018566	-0.665628
																								ENSMUSG00000037972	0.207341	6.02663	9.81293	0.00173289	0.0135772																			ENSMUSG00000023307	0.35287
																								ENSMUSG00000004937	0.196578	6.38217	9.81285	0.00173297	0.0135772																			ENSMUSG00000097392	0.900703
																								ENSMUSG00000043154	0.261487	8.5887	9.81096	0.00173475	0.0135834																			ENSMUSG00000056666	-0.807182
																								ENSMUSG00000049134	0.454108	9.51048	9.80861	0.00173696	0.0135929																			ENSMUSG00000028382	-0.34876
																								ENSMUSG00000005779	0.187648	6.80996	9.80452	0.00174083	0.0136154																			ENSMUSG00000040147	-0.951829
																								ENSMUSG00000028883	-0.440573	3.20469	9.79562	0.00174928	0.0136737																			ENSMUSG00000018554	-0.684319
																								ENSMUSG00000043017	-0.479205	2.99497	9.79409	0.00175073	0.0136752																			ENSMUSG00000034165	-0.446729
																								ENSMUSG00000022261	-0.273668	6.11349	9.7933	0.00175148	0.0136752																			ENSMUSG00000027679	0.4217
																								ENSMUSG00000035441	-0.346246	4.31699	9.79025	0.00175439	0.0136901																			ENSMUSG00000031776	-0.43542
																								ENSMUSG00000027624	-0.273102	4.53902	9.78244	0.00176187	0.0137406																			ENSMUSG00000020258	0.627796
																								ENSMUSG00000032563	0.356026	6.70835	9.78076	0.00176347	0.0137435																			ENSMUSG00000030149	1.3494
																								ENSMUSG00000025968	0.324121	9.65105	9.77969	0.0017645	0.0137435																			ENSMUSG00000028082	0.431799
																								ENSMUSG00000025940	0.34435	6.56349	9.77889	0.00176527	0.0137435																			ENSMUSG00000033213	-1.51803
																								ENSMUSG00000040940	-0.290629	6.6337	9.77054	0.0017733	0.0137844																			ENSMUSG00000034930	-0.661606
																								ENSMUSG00000002808	0.30767	4.4002	9.77046	0.00177338	0.0137844																			ENSMUSG00000071723	-0.627825
																								ENSMUSG00000034957	-0.687589	3.59784	9.77028	0.00177355	0.0137844																			ENSMUSG00000096546	0.503568
																								ENSMUSG00000002345	-0.275334	3.50866	9.76902	0.00177477	0.013786																			ENSMUSG00000034570	-0.463696
																								ENSMUSG00000017843	0.194472	7.13469	9.76249	0.00178108	0.013824																			ENSMUSG00000015944	0.741137
																								ENSMUSG00000022477	0.340866	11.1939	9.7615	0.00178204	0.013824																			ENSMUSG00000027871	-5.15637
																								ENSMUSG00000042115	0.627466	5.10643	9.76083	0.00178269	0.013824																			ENSMUSG00000038305	0.7739
																								ENSMUSG00000025407	-0.578935	1.87115	9.74357	0.00179951	0.0139464																			ENSMUSG00000020592	-0.605043
																								ENSMUSG00000032348	0.255187	6.21711	9.73772	0.00180525	0.013983																			ENSMUSG00000053604	-0.50046
																								ENSMUSG00000046909	0.293975	4.32615	9.73588	0.00180705	0.013989																			ENSMUSG00000062012	-0.725443
																								ENSMUSG00000030246	0.367112	10.3062	9.73252	0.00181036	0.0139931																			ENSMUSG00000035762	0.399911
																								ENSMUSG00000021696	-0.655526	1.27527	9.73222	0.00181066	0.0139931																			ENSMUSG00000097993	-1.12139
																								ENSMUSG00000027219	0.425526	4.6565	9.73222	0.00181066	0.0139931																			ENSMUSG00000035498	0.640855
																								ENSMUSG00000027472	0.324218	6.81373	9.72738	0.00181543	0.014022																			ENSMUSG00000067276	-0.866843
																								ENSMUSG00000038600	-0.80245	1.44805	9.72506	0.00181772	0.0140318																			ENSMUSG00000053819	-0.376278
																								ENSMUSG00000063919	0.630411	4.17679	9.72112	0.00182163	0.0140477																			ENSMUSG00000026596	0.53449
																								ENSMUSG00000047371	0.283582	5.0682	9.72054	0.0018222	0.0140477																			ENSMUSG00000074254	2.15478
																								ENSMUSG00000008658	0.276977	5.40515	9.71987	0.00182287	0.0140477																			ENSMUSG00000096188	0.373379
																								ENSMUSG00000079562	0.176879	6.48947	9.71411	0.00182859	0.0140838																			ENSMUSG00000030598	-0.808578
																								ENSMUSG00000025083	-0.520738	2.9402	9.71141	0.00183127	0.0140965																			ENSMUSG00000025555	-0.453015
																								ENSMUSG00000020268	0.269068	4.9091	9.70768	0.001835	0.0141173																			ENSMUSG00000022856	0.611019
																								ENSMUSG00000041353	-0.4208	2.10698	9.70097	0.00184171	0.0141609																			ENSMUSG00000054967	-0.944698
																								ENSMUSG00000006315	0.272871	6.12557	9.69984	0.00184284	0.0141617																			ENSMUSG00000015962	1.13295
																								ENSMUSG00000079508	0.313711	6.40473	9.69791	0.00184477	0.0141641																			ENSMUSG00000060002	0.623679
																								ENSMUSG00000027406	0.325579	9.49216	9.69746	0.00184523	0.0141641																			ENSMUSG00000014353	0.397084
																								ENSMUSG00000020516	0.167263	5.51505	9.69563	0.00184707	0.0141702																			ENSMUSG00000028194	0.643814
																								ENSMUSG00000022946	-0.338356	4.35859	9.68089	0.00186195	0.0142763																			ENSMUSG00000019891	0.40484
																								ENSMUSG00000074577	-0.811868	1.46307	9.67601	0.0018669	0.0142958																			ENSMUSG00000027374	0.329844
																								ENSMUSG00000031304	-0.342748	3.7369	9.67573	0.00186718	0.0142958																			ENSMUSG00000066026	-0.619733
																								ENSMUSG00000010601	-1.07681	-0.641779	9.67529	0.00186762	0.0142958																			ENSMUSG00000024425	0.30391
																								ENSMUSG00000028248	-0.157887	6.88829	9.67292	0.00187004	0.0143062																			ENSMUSG00000020424	0.774195
																								ENSMUSG00000027716	0.391979	2.9094	9.66689	0.00187619	0.0143452																			ENSMUSG00000010914	0.339897
																								ENSMUSG00000034171	-0.714699	1.80878	9.66485	0.00187828	0.0143485																			ENSMUSG00000079471	-2.13154
																								ENSMUSG00000057596	-0.545062	2.42035	9.66442	0.00187872	0.0143485																			ENSMUSG00000001525	-0.513949
																								ENSMUSG00000052854	-0.872168	0.630261	9.66038	0.00188285	0.014372																			ENSMUSG00000024151	-0.46156
																								ENSMUSG00000039041	0.189825	5.77935	9.65358	0.00188983	0.0144172																			ENSMUSG00000003410	-0.898465
																								ENSMUSG00000062908	0.506317	9.86903	9.65182	0.00189164	0.0144229																			ENSMUSG00000024969	0.322968
																								ENSMUSG00000063179	0.245707	4.80324	9.64539	0.00189827	0.0144655																			ENSMUSG00000020186	0.52927
																								ENSMUSG00000029757	-0.894017	-0.348815	9.63409	0.00190999	0.0145381																			ENSMUSG00000023961	-0.33871
																								ENSMUSG00000046618	-0.5507	4.22148	9.63341	0.0019107	0.0145381																			ENSMUSG00000041556	-0.844524
																								ENSMUSG00000014602	-0.674522	2.28267	9.63268	0.00191145	0.0145381																			ENSMUSG00000033308	0.62391
																								ENSMUSG00000032536	0.302363	8.64623	9.63209	0.00191207	0.0145381																			ENSMUSG00000053436	0.36456
																								ENSMUSG00000021996	0.181632	6.34511	9.62313	0.00192142	0.0146011																			ENSMUSG00000070880	-1.38193
																								ENSMUSG00000037995	-0.927019	0.195738	9.62069	0.00192397	0.0146124																			ENSMUSG00000022861	1.10229
																								ENSMUSG00000087403	-0.440412	2.49598	9.61429	0.00193069	0.0146552																			ENSMUSG00000027843	3.90155
																								ENSMUSG00000044768	-0.430258	2.71832	9.60998	0.00193522	0.0146705																			ENSMUSG00000036932	0.344858
																								ENSMUSG00000017969	-0.726711	4.75939	9.60933	0.00193592	0.0146705																			ENSMUSG00000020546	0.428018
																								ENSMUSG00000079164	-0.726607	1.80853	9.60932	0.00193592	0.0146705																			ENSMUSG00000042340	-0.674285
																								ENSMUSG00000056271	-1.00289	-0.367042	9.60306	0.00194253	0.0147124																			ENSMUSG00000038624	-0.9243
																								ENSMUSG00000029863	-0.221817	4.10424	9.60144	0.00194425	0.0147172																			ENSMUSG00000047502	0.864817
																								ENSMUSG00000029471	-0.264434	4.35569	9.59827	0.00194761	0.0147322																			ENSMUSG00000089862	0.324077
																								ENSMUSG00000030770	-0.246882	6.2743	9.59754	0.00194839	0.0147322																			ENSMUSG00000003199	-0.705552
																								ENSMUSG00000040697	0.335722	5.75285	9.59545	0.0019506	0.014734																			ENSMUSG00000016995	-0.868661
																								ENSMUSG00000015149	0.173237	6.15524	9.59462	0.00195149	0.014734																			ENSMUSG00000027650	0.369951
																								ENSMUSG00000000374	0.238899	6.3086	9.59426	0.00195187	0.014734																			ENSMUSG00000030220	-0.509476
																								ENSMUSG00000020205	0.579969	4.66674	9.59303	0.00195317	0.0147357																			ENSMUSG00000058444	0.366362
																								ENSMUSG00000021760	-0.323997	4.42058	9.58696	0.00195964	0.0147763																			ENSMUSG00000027935	-0.528918
																								ENSMUSG00000037353	-0.355662	3.94694	9.58236	0.00196456	0.0147977																			ENSMUSG00000051504	1.75586
																								ENSMUSG00000029918	0.22381	4.70956	9.58228	0.00196465	0.0147977																			ENSMUSG00000036192	-1.27824
																								ENSMUSG00000038244	-0.318111	6.85453	9.57048	0.00197731	0.0148849																			ENSMUSG00000038280	0.409772
																								ENSMUSG00000044206	-0.699469	3.38253	9.56156	0.00198695	0.0149412																			ENSMUSG00000028841	-0.688301
																								ENSMUSG00000038181	-0.303019	4.28886	9.56153	0.00198698	0.0149412																			ENSMUSG00000030657	0.793709
																								ENSMUSG00000020422	-0.378715	6.24949	9.5543	0.00199482	0.0149656																			ENSMUSG00000026662	0.316603
																								ENSMUSG00000031486	-0.51913	4.92116	9.55406	0.00199508	0.0149656																			ENSMUSG00000038807	-0.576655
																								ENSMUSG00000027750	-0.460405	5.29705	9.55369	0.00199547	0.0149656																			ENSMUSG00000030515	-0.396275
																								ENSMUSG00000025651	0.397867	10.0379	9.55357	0.00199561	0.0149656																			ENSMUSG00000037487	0.40154
																								ENSMUSG00000006021	0.240679	4.23268	9.55348	0.00199571	0.0149656																			ENSMUSG00000029228	-0.607198
																								ENSMUSG00000012017	-0.309474	4.03789	9.5499	0.0019996	0.0149797																			ENSMUSG00000072964	-0.685954
																								ENSMUSG00000044080	0.354986	9.14444	9.54974	0.00199978	0.0149797																			ENSMUSG00000026791	-0.500519
																								ENSMUSG00000030666	-0.902198	1.58874	9.54846	0.00200117	0.0149819																			ENSMUSG00000040351	0.747383
																								ENSMUSG00000012117	0.221646	4.95921	9.54487	0.00200509	0.0150001																			ENSMUSG00000090173	-1.16564
																								ENSMUSG00000047842	-1.36326	1.58496	9.54422	0.0020058	0.0150001																			ENSMUSG00000013419	-0.612751
																								ENSMUSG00000050953	0.352815	9.2791	9.53944	0.00201103	0.0150309																			ENSMUSG00000046093	-1.21931
																								ENSMUSG00000022844	-0.43989	2.80059	9.53089	0.00202043	0.0150877																			ENSMUSG00000000581	0.346906
																								ENSMUSG00000030433	-0.914482	6.02183	9.53052	0.00202083	0.0150877																			ENSMUSG00000032105	0.407468
																								ENSMUSG00000034593	-0.326345	4.8608	9.52809	0.0020235	0.0150994																			ENSMUSG00000030098	-0.850573
																								ENSMUSG00000038619	0.167073	7.16947	9.52699	0.00202472	0.0151002																			ENSMUSG00000030341	-0.349
																								ENSMUSG00000040899	-1.43343	-0.555527	9.52448	0.00202749	0.0151126																			ENSMUSG00000038236	0.28514
																								ENSMUSG00000074923	0.356378	3.56782	9.52221	0.00203	0.0151184																			ENSMUSG00000032349	-0.567839
																								ENSMUSG00000025868	0.350931	5.6196	9.52178	0.00203048	0.0151184																			ENSMUSG00000026615	0.31569
																								ENSMUSG00000018574	0.338735	9.99068	9.51945	0.00203305	0.0151293																			ENSMUSG00000003660	0.366489
																								ENSMUSG00000031660	0.266384	6.06071	9.51717	0.00203558	0.0151319																			ENSMUSG00000039092	-1.47563
																								ENSMUSG00000021203	-0.424385	2.61052	9.51713	0.00203563	0.0151319																			ENSMUSG00000020720	0.341986
																								ENSMUSG00000022337	0.254311	6.86069	9.50985	0.00204372	0.0151764																			ENSMUSG00000083282	-0.64516
																								ENSMUSG00000039844	0.323373	7.19561	9.50893	0.00204475	0.0151764																			ENSMUSG00000024899	-0.657583
																								ENSMUSG00000091264	0.257072	5.22757	9.50875	0.00204495	0.0151764																			ENSMUSG00000029684	0.394064
																								ENSMUSG00000028229	0.282548	5.243	9.50555	0.00204851	0.0151946																			ENSMUSG00000039116	-0.659445
																								ENSMUSG00000026254	0.184877	5.99892	9.50075	0.00205387	0.0152261																			ENSMUSG00000031848	0.525898
																								ENSMUSG00000025572	-0.386928	4.0006	9.49437	0.00206103	0.0152709																			ENSMUSG00000030213	-0.358319
																								ENSMUSG00000019966	0.38113	6.11048	9.49279	0.00206281	0.0152711																			ENSMUSG00000031667	-0.362438
																								ENSMUSG00000003099	0.213755	6.3681	9.49236	0.0020633	0.0152711																			ENSMUSG00000033540	-0.493261
																								ENSMUSG00000021417	0.370529	6.73515	9.48832	0.00206784	0.0152964																			ENSMUSG00000028343	0.405087
																								ENSMUSG00000027599	0.193787	5.92849	9.48659	0.00206979	0.0153002																			ENSMUSG00000060802	-0.533598
																								ENSMUSG00000062691	0.262982	3.86912	9.48587	0.0020706	0.0153002																			ENSMUSG00000032253	0.439295
																								ENSMUSG00000025487	0.191761	6.1595	9.48216	0.00207479	0.0153229																			ENSMUSG00000048076	0.343105
																								ENSMUSG00000030431	-0.491115	1.29664	9.47962	0.00207767	0.0153333																			ENSMUSG00000048440	-0.816215
																								ENSMUSG00000040560	0.224538	5.0755	9.47894	0.00207844	0.0153333																			ENSMUSG00000037747	-0.385155
																								ENSMUSG00000050232	-1.11523	-0.169632	9.47545	0.0020824	0.0153542																			ENSMUSG00000005958	-0.679751
																								ENSMUSG00000091243	-0.504568	3.90712	9.46774	0.00209117	0.0154102																			ENSMUSG00000038736	0.39546
																								ENSMUSG00000032527	0.271579	6.70649	9.46679	0.00209226	0.0154102																			ENSMUSG00000024383	0.484833
																								ENSMUSG00000033009	0.19711	5.31273	9.46569	0.00209351	0.0154111																			ENSMUSG00000024511	-0.596037
																								ENSMUSG00000007039	-0.268133	4.80322	9.46449	0.00209488	0.0154129																			ENSMUSG00000055639	-0.448232
																								ENSMUSG00000034636	0.254109	7.02958	9.4541	0.00210678	0.0154921																			ENSMUSG00000034156	-0.783835
																								ENSMUSG00000002732	-0.318476	4.20508	9.44452	0.00211781	0.0155648																			ENSMUSG00000027544	-0.71492
																								ENSMUSG00000035606	0.63887	4.12216	9.44353	0.00211895	0.0155648																			ENSMUSG00000053646	-0.40663
																								ENSMUSG00000028159	-0.470203	3.57661	9.44049	0.00212247	0.0155823																			ENSMUSG00000070337	1.6311
																								ENSMUSG00000015095	0.240844	6.23338	9.4329	0.00213126	0.0156384																			ENSMUSG00000020123	-0.746341
																								ENSMUSG00000015714	-0.184036	5.6022	9.43003	0.0021346	0.0156518																			ENSMUSG00000051890	-0.574466
																								ENSMUSG00000026430	-0.547855	2.95378	9.42901	0.00213579	0.0156518																			ENSMUSG00000040350	0.883598
																								ENSMUSG00000022090	-0.52305	3.51518	9.42838	0.00213652	0.0156518																			ENSMUSG00000005131	-0.672863
																								ENSMUSG00000022945	-0.696188	-0.519036	9.42179	0.00214422	0.0156998																			ENSMUSG00000066150	0.344169
																								ENSMUSG00000025085	0.320712	9.05729	9.4177	0.00214901	0.0157263																			ENSMUSG00000028700	-0.31709
																								ENSMUSG00000031633	0.326306	11.8983	9.41168	0.00215608	0.0157647																			ENSMUSG00000021033	0.320059
																								ENSMUSG00000031444	-0.872187	0.150024	9.41127	0.00215656	0.0157647																			ENSMUSG00000025142	0.311917
																								ENSMUSG00000029577	0.258437	7.18693	9.40803	0.00216037	0.0157807																			ENSMUSG00000067212	-0.623503
																								ENSMUSG00000029050	-0.221317	6.80951	9.40745	0.00216106	0.0157807																			ENSMUSG00000036323	0.348438
																								ENSMUSG00000026728	-0.430724	8.43906	9.3985	0.00217163	0.0158494																			ENSMUSG00000028960	0.337928
																								ENSMUSG00000013593	0.320061	9.78957	9.39668	0.00217378	0.0158567																			ENSMUSG00000019368	1.94501
																								ENSMUSG00000030842	0.192996	6.18457	9.39474	0.00217609	0.015865																			ENSMUSG00000039678	0.400014
																								ENSMUSG00000013858	0.230094	6.72669	9.39148	0.00217996	0.0158744																			ENSMUSG00000040836	-0.698209
																								ENSMUSG00000035776	0.188906	6.85927	9.39127	0.00218021	0.0158744																			ENSMUSG00000035572	0.485273
																								ENSMUSG00000045917	0.339648	4.28162	9.39071	0.00218087	0.0158744																			ENSMUSG00000067206	-0.62594
																								ENSMUSG00000022779	-0.181765	4.80228	9.38705	0.00218523	0.0158962																			ENSMUSG00000044252	-0.35894
																								ENSMUSG00000028671	-0.67008	1.27895	9.38588	0.00218663	0.0158962																			ENSMUSG00000048371	0.63378
																								ENSMUSG00000019823	-0.393883	4.33249	9.38527	0.00218736	0.0158962																			ENSMUSG00000022528	-0.598032
																								ENSMUSG00000024527	0.338145	7.43089	9.38034	0.00219324	0.0159305																			ENSMUSG00000023068	0.381378
																								ENSMUSG00000030612	0.273866	4.85155	9.37644	0.00219792	0.0159407																			ENSMUSG00000038260	-0.709289
																								ENSMUSG00000025488	0.305116	8.41318	9.37632	0.00219807	0.0159407																			ENSMUSG00000053580	0.484345
																								ENSMUSG00000051343	0.371453	6.92288	9.37624	0.00219816	0.0159407																			ENSMUSG00000048373	-1.15785
																								ENSMUSG00000038201	0.590702	1.78165	9.37198	0.00220328	0.0159694																			ENSMUSG00000046589	-0.909499
																								ENSMUSG00000021273	0.318187	5.08821	9.36966	0.00220606	0.0159811																			ENSMUSG00000003411	-0.824507
																								ENSMUSG00000047658	0.428922	3.97826	9.36744	0.00220874	0.015988																			ENSMUSG00000027822	0.48951
																								ENSMUSG00000001670	-1.04614	0.181556	9.36692	0.00220937	0.015988																			ENSMUSG00000042473	0.430546
																								ENSMUSG00000002222	0.181387	7.15445	9.35535	0.00222336	0.0160808																			ENSMUSG00000020553	0.704865
																								ENSMUSG00000022416	-1.02277	0.583824	9.35057	0.00222917	0.0161142																			ENSMUSG00000020990	-0.528275
																								ENSMUSG00000040549	0.227105	6.27856	9.34396	0.00223721	0.0161582																			ENSMUSG00000025036	-0.545564
																								ENSMUSG00000042436	-0.652127	4.68384	9.34363	0.00223762	0.0161582																			ENSMUSG00000040591	-0.453314
																								ENSMUSG00000036503	0.212432	6.73301	9.33928	0.00224293	0.016188																			ENSMUSG00000030774	0.548575
																								ENSMUSG00000022517	0.223135	7.86382	9.33739	0.00224525	0.0161962																			ENSMUSG00000030145	-0.733556
																								ENSMUSG00000060216	-0.329194	4.44403	9.32701	0.002258	0.0162739																			ENSMUSG00000010051	1.01185
																								ENSMUSG00000027165	0.255742	5.82941	9.32668	0.00225841	0.0162739																			ENSMUSG00000020694	-0.288091
																								ENSMUSG00000013663	0.255804	6.39843	9.32428	0.00226137	0.0162866																			ENSMUSG00000055371	0.312302
																								ENSMUSG00000006476	-0.210026	4.80707	9.31927	0.00226756	0.0163223																			ENSMUSG00000040374	0.357628
																								ENSMUSG00000032231	-0.346912	7.00566	9.3174	0.00226988	0.0163223																			ENSMUSG00000059810	-0.917214
																								ENSMUSG00000031506	-0.707866	1.30544	9.31732	0.00226997	0.0163223																			ENSMUSG00000021097	0.451853
																								ENSMUSG00000039474	0.370316	6.64386	9.31641	0.00227111	0.0163223																			ENSMUSG00000062014	0.425079
																								ENSMUSG00000027673	0.265731	8.28075	9.31387	0.00227425	0.0163363																			ENSMUSG00000063903	-0.716983
																								ENSMUSG00000053754	-0.1867	5.97024	9.3126	0.00227583	0.0163391																			ENSMUSG00000020778	-0.53542
																								ENSMUSG00000014599	-0.309301	5.96797	9.31067	0.00227823	0.0163477																			ENSMUSG00000040102	0.47769
																								ENSMUSG00000011884	-0.35065	4.99915	9.30717	0.00228259	0.0163677																			ENSMUSG00000038148	-0.529134
																								ENSMUSG00000026820	0.32379	5.4081	9.30592	0.00228415	0.0163677																			ENSMUSG00000032012	-0.570818
																								ENSMUSG00000047810	-0.568576	2.55799	9.30554	0.00228462	0.0163677																			ENSMUSG00000036966	-0.304954
																								ENSMUSG00000004846	-0.221822	5.34326	9.30243	0.0022885	0.0163869																			ENSMUSG00000052906	0.351635
																								ENSMUSG00000031538	-0.349413	5.0245	9.30123	0.00229	0.016389																			ENSMUSG00000109764	-0.859064
																								ENSMUSG00000022999	-0.238549	3.91957	9.29912	0.00229264	0.0163956																			ENSMUSG00000032714	-0.4016
																								ENSMUSG00000032841	-0.483778	1.20558	9.29802	0.00229402	0.0163956																			ENSMUSG00000001166	-0.837945
																								ENSMUSG00000020954	0.231023	6.83063	9.29762	0.00229452	0.0163956																			ENSMUSG00000045594	0.58232
																								ENSMUSG00000004631	-0.319183	4.65691	9.29464	0.00229826	0.0164137																			ENSMUSG00000020737	-0.38605
																								ENSMUSG00000009687	-0.462519	4.80063	9.28363	0.00231211	0.0165037																			ENSMUSG00000019139	-0.454745
																								ENSMUSG00000039481	-0.292711	3.95284	9.28271	0.00231327	0.0165037																			ENSMUSG00000040697	0.32236
																								ENSMUSG00000026112	0.293117	7.6075	9.28019	0.00231645	0.0165177																			ENSMUSG00000020547	-0.393398
																								ENSMUSG00000031298	-0.544195	2.16817	9.27656	0.00232105	0.0165419																			ENSMUSG00000020656	-0.805823
																								ENSMUSG00000045962	0.33015	9.49819	9.27103	0.00232807	0.0165833																			ENSMUSG00000037738	-1.41738
																								ENSMUSG00000006586	-0.369292	3.09447	9.26943	0.00233011	0.0165891																			ENSMUSG00000021684	-0.511063
																								ENSMUSG00000021606	0.324214	8.21986	9.26797	0.00233196	0.0165936																			ENSMUSG00000020458	-0.363588
																								ENSMUSG00000050394	-0.555419	0.807072	9.26566	0.00233491	0.016606																			ENSMUSG00000025532	0.333572
																								ENSMUSG00000059049	-1.01045	1.25489	9.26396	0.00233707	0.0166127																			ENSMUSG00000030956	-0.363379
																								ENSMUSG00000039959	-0.221889	5.90043	9.26176	0.00233989	0.016624																			ENSMUSG00000060044	1.33631
																								ENSMUSG00000022442	0.404325	5.50088	9.25668	0.00234637	0.0166615																			ENSMUSG00000033032	0.555657
																								ENSMUSG00000054455	0.180879	6.91052	9.25562	0.00234774	0.0166625																			ENSMUSG00000031380	-0.847154
																								ENSMUSG00000022969	0.459421	1.70769	9.2504	0.00235444	0.0166945																			ENSMUSG00000047766	-0.597405
																								ENSMUSG00000070031	-0.654486	2.37372	9.2473	0.00235843	0.0166945																			ENSMUSG00000072294	0.740818
																								ENSMUSG00000006717	0.298091	7.542	9.24712	0.00235867	0.0166945																			ENSMUSG00000020121	-0.613094
																								ENSMUSG00000027134	-0.474219	2.18695	9.24675	0.00235914	0.0166945																			ENSMUSG00000017756	0.542169
																								ENSMUSG00000063727	-1.58761	0.520491	9.24649	0.00235947	0.0166945																			ENSMUSG00000022946	-0.445098
																								ENSMUSG00000029617	0.292321	5.11152	9.24566	0.00236054	0.0166945																			ENSMUSG00000026004	0.705325
																								ENSMUSG00000064254	0.368075	5.04093	9.24517	0.00236118	0.0166945																			ENSMUSG00000069844	0.487308
																								ENSMUSG00000068452	-0.776995	1.98368	9.2445	0.00236203	0.0166945																			ENSMUSG00000038235	-0.321896
																								ENSMUSG00000041712	0.206658	5.29886	9.24094	0.00236664	0.01671																			ENSMUSG00000079418	0.411911
																								ENSMUSG00000052331	-0.325403	4.406	9.2409	0.00236668	0.01671																			ENSMUSG00000058503	0.476155
																								ENSMUSG00000027433	0.193143	5.82692	9.23837	0.00236996	0.0167245																			ENSMUSG00000047205	-0.465364
																								ENSMUSG00000025492	-0.290088	6.20765	9.23507	0.00237424	0.016746																			ENSMUSG00000027086	0.379291
																								ENSMUSG00000031776	0.229982	6.68151	9.23297	0.00237696	0.0167566																			ENSMUSG00000025237	-0.396881
																								ENSMUSG00000028807	-0.516912	2.41417	9.22924	0.00238181	0.0167821																			ENSMUSG00000061751	-0.472168
																								ENSMUSG00000027955	-0.430211	6.40867	9.2248	0.00238759	0.0168142																			ENSMUSG00000028557	0.399573
																								ENSMUSG00000025007	-0.312469	3.36368	9.22264	0.0023904	0.0168213																			ENSMUSG00000070645	-0.800575
																								ENSMUSG00000055447	-0.243249	6.67934	9.22213	0.00239107	0.0168213																			ENSMUSG00000028121	-0.371005
																								ENSMUSG00000024780	0.268926	7.17202	9.2204	0.00239334	0.0168272																			ENSMUSG00000006218	1.05876
																								ENSMUSG00000063450	-0.298613	6.70447	9.21961	0.00239437	0.0168272																			ENSMUSG00000039375	-1.01476
																								ENSMUSG00000039357	-0.265099	3.75324	9.21822	0.00239618	0.016828																			ENSMUSG00000020075	0.407018
																								ENSMUSG00000054021	0.309697	5.69244	9.21764	0.00239695	0.016828																			ENSMUSG00000040888	0.471104
																								ENSMUSG00000037110	0.36491	6.92217	9.20915	0.00240809	0.0168836																			ENSMUSG00000016510	0.379115
																								ENSMUSG00000039914	0.385526	7.58313	9.20876	0.0024086	0.0168836																			ENSMUSG00000032435	0.845014
																								ENSMUSG00000060600	0.352512	10.4623	9.20826	0.00240925	0.0168836																			ENSMUSG00000023013	-0.88957
																								ENSMUSG00000022575	-0.432453	4.22199	9.20783	0.00240982	0.0168836																			ENSMUSG00000030538	0.391265
																								ENSMUSG00000024228	0.296855	4.72972	9.20225	0.00241718	0.0169265																			ENSMUSG00000024867	-0.57847
																								ENSMUSG00000059430	-0.765536	0.640291	9.19096	0.00243213	0.0170224																			ENSMUSG00000024944	-0.35741
																								ENSMUSG00000073411	-0.452661	6.32216	9.18559	0.00243927	0.0170637																			ENSMUSG00000022490	-0.643927
																								ENSMUSG00000027200	-0.187395	5.93982	9.18345	0.00244213	0.0170749																			ENSMUSG00000040043	-0.351381
																								ENSMUSG00000021281	0.370358	6.11885	9.18113	0.00244523	0.0170878																			ENSMUSG00000026380	-0.461731
																								ENSMUSG00000042138	-0.24526	3.6865	9.17724	0.00245043	0.0171154																			ENSMUSG00000024580	0.508759
																								ENSMUSG00000038352	-0.687077	2.33481	9.17572	0.00245247	0.0171208																			ENSMUSG00000040413	4.03703
																								ENSMUSG00000020549	0.267785	4.60821	9.16819	0.00246258	0.0171827																			ENSMUSG00000020116	0.290086
																								ENSMUSG00000022489	-0.476107	1.98989	9.15861	0.00247551	0.0172641																			ENSMUSG00000071714	-0.821542
																								ENSMUSG00000028194	0.569041	3.1632	9.15373	0.00248212	0.0173013																			ENSMUSG00000035891	-0.451856
																								ENSMUSG00000064302	0.302548	9.19436	9.14785	0.0024901	0.0173481																			ENSMUSG00000000275	0.360119
																								ENSMUSG00000028601	0.279397	5.35982	9.14624	0.0024923	0.0173495																			ENSMUSG00000025019	0.705968
																								ENSMUSG00000000439	0.200483	5.3026	9.14492	0.0024941	0.0173495																			ENSMUSG00000021242	-0.560741
																								ENSMUSG00000041220	-1.28463	3.63003	9.1449	0.00249412	0.0173495																			ENSMUSG00000097487	-0.826844
																								ENSMUSG00000034285	-0.673316	1.44476	9.14027	0.00250044	0.0173722																			ENSMUSG00000031245	-0.300719
																								ENSMUSG00000026360	-0.572701	4.71632	9.13951	0.00250148	0.0173722																			ENSMUSG00000032719	-0.726153
																								ENSMUSG00000030662	0.268386	7.72596	9.139	0.00250218	0.0173722																			ENSMUSG00000030199	0.468391
																								ENSMUSG00000014426	0.254032	5.79939	9.13878	0.00250248	0.0173722																			ENSMUSG00000051950	-0.418386
																								ENSMUSG00000025246	-0.165895	6.50997	9.13753	0.00250419	0.0173753																			ENSMUSG00000038267	-0.52208
																								ENSMUSG00000021371	0.240435	6.35837	9.13132	0.00251271	0.0174219																			ENSMUSG00000043881	0.348912
																								ENSMUSG00000022584	0.482874	2.15889	9.13025	0.00251418	0.0174219																			ENSMUSG00000030793	-0.544531
																								ENSMUSG00000032440	-0.316133	6.92354	9.12956	0.00251513	0.0174219																			ENSMUSG00000025917	0.278154
																								ENSMUSG00000048163	-0.570016	3.35281	9.12834	0.0025168	0.0174219																			ENSMUSG00000087303	3.33408
																								ENSMUSG00000031672	0.410346	9.49984	9.12798	0.00251729	0.0174219																			ENSMUSG00000031558	-0.616364
																								ENSMUSG00000032085	-0.384524	4.94086	9.12542	0.00252082	0.0174375																			ENSMUSG00000042901	-0.355073
																								ENSMUSG00000042473	-0.336385	4.18766	9.11117	0.00254053	0.0175592																			ENSMUSG00000070644	0.685874
																								ENSMUSG00000040938	-0.643775	-0.189659	9.10948	0.00254288	0.0175592																			ENSMUSG00000051262	0.886723
																								ENSMUSG00000023025	0.244422	6.01803	9.10889	0.0025437	0.0175592																			ENSMUSG00000028073	0.540866
																								ENSMUSG00000035681	-0.83458	1.73032	9.10878	0.00254386	0.0175592																			ENSMUSG00000020671	0.279478
																								ENSMUSG00000043885	-0.192265	4.64322	9.10773	0.00254532	0.0175592																			ENSMUSG00000024247	-0.443118
																								ENSMUSG00000031283	-0.892017	3.49751	9.1071	0.00254619	0.0175592																			ENSMUSG00000031390	-0.725614
																								ENSMUSG00000022848	0.198614	6.0607	9.10622	0.00254742	0.0175592																			ENSMUSG00000025384	-0.465829
																								ENSMUSG00000021764	0.257367	7.5713	9.10075	0.00255505	0.0176029																			ENSMUSG00000037624	-0.581126
																								ENSMUSG00000026519	-0.277361	5.24852	9.09222	0.002567	0.0176762																			ENSMUSG00000016179	-1.61098
																								ENSMUSG00000017344	0.434711	3.78353	9.0913	0.00256828	0.0176762																			ENSMUSG00000020122	0.418444
																								ENSMUSG00000017978	-0.443529	3.33261	9.08782	0.00257317	0.0177009																			ENSMUSG00000023122	0.545795
																								ENSMUSG00000002846	0.247272	5.25666	9.08435	0.00257807	0.0177257																			ENSMUSG00000022026	1.70523
																								ENSMUSG00000041096	-0.202678	4.62358	9.08018	0.00258395	0.0177525																			ENSMUSG00000024486	0.6569
																								ENSMUSG00000041308	-0.388166	5.37426	9.07974	0.00258457	0.0177525																			ENSMUSG00000016552	0.913526
																								ENSMUSG00000021356	-0.721417	1.90548	9.07635	0.00258936	0.0177765																			ENSMUSG00000042032	0.313115
																								ENSMUSG00000032382	-0.184323	5.18146	9.07426	0.00259233	0.0177879																			ENSMUSG00000029445	-1.46224
																								ENSMUSG00000068614	0.402171	13.1005	9.061	0.00261119	0.0179083																			ENSMUSG00000040543	-0.541526
																								ENSMUSG00000044573	0.214427	4.02339	9.06008	0.0026125	0.0179083																			ENSMUSG00000024953	0.408316
																								ENSMUSG00000062995	-0.357411	4.05001	9.05784	0.0026157	0.0179213																			ENSMUSG00000027253	-0.73516
																								ENSMUSG00000045725	-0.802291	1.90342	9.05608	0.00261822	0.0179295																			ENSMUSG00000067071	0.502172
																								ENSMUSG00000035783	-0.454903	5.94663	9.05411	0.00262104	0.0179398																			ENSMUSG00000070407	-0.617057
																								ENSMUSG00000045636	0.28323	8.32399	9.05	0.00262694	0.0179712																			ENSMUSG00000047604	-0.999788
																								ENSMUSG00000022272	0.545316	6.05767	9.0489	0.00262852	0.017973																			ENSMUSG00000032758	1.82755
[truncated: 4,146 more rows]
[truncated: 142 more columns]

## Sheet: Data S9B
Brain																								Heart																								Kidney
DOM bias						MUS bias						SPR bias						DOM-MUS bias						DOM bias						MUS bias						SPR bias						DOM-MUS bias						DOM bias
Geneid	logFC	logCPM	LR	PValue	FDR	Geneid	logFC	logCPM	LR	PValue	FDR	Geneid	logFC	logCPM	LR	PValue	FDR	Geneid	logFC	logCPM	LR	PValue	FDR	Geneid	logFC	logCPM	LR	PValue	FDR	Geneid	logFC	logCPM	LR	PValue	FDR	Geneid	logFC	logCPM	LR	PValue	FDR	Geneid	logFC	logCPM	LR	PValue	FDR	Geneid	logFC
ENSMUSG00000086503	-13.021	15.3909	5159.38	0	0	ENSMUSG00000086503	-13.6056	15.3165	7211.06	0	0	ENSMUSG00000086503	-13.4973	15.284	10753.2	0	0	ENSMUSG00000086503	-13.3227	15.3482	10817.9	0	0	ENSMUSG00000086503	-11.7119	14.8347	1522.64	0	0	ENSMUSG00000099876	8.01327	6.00942	273.445	2.01419e-61	2.63456e-58	ENSMUSG00000086503	-12.4684	15.191	2519.4	0	0	ENSMUSG00000099876	8.32793	6.62858	433.243	3.19857e-96	4.2573e-93	ENSMUSG00000086503	-10.9393
ENSMUSG00000099876	9.86577	7.22257	704.247	3.56514e-155	3.07137e-152	ENSMUSG00000099876	10.056	6.78676	964.975	7.37257e-212	7.19563e-209	ENSMUSG00000099876	7.77301	4.77796	245.847	2.08909e-55	2.01493e-52	ENSMUSG00000099876	9.94857	7.00879	1601.24	0	0	ENSMUSG00000099876	8.50607	7.14801	515.518	3.99653e-114	2.34996e-111	ENSMUSG00000086503	-10.2272	14.7694	87.0936	1.03504e-20	6.76917e-18	ENSMUSG00000097571	-0.777372	8.7864	29.1966	6.53944e-08	3.80922e-05	ENSMUSG00000086503	-10.6575	14.7922	242.044	1.40967e-54	9.38138e-52	ENSMUSG00000099876	9.68631
ENSMUSG00000097571	-0.444223	9.39891	33.1782	8.40872e-09	4.82941e-06	ENSMUSG00000087174	-0.556015	9.94977	37.7008	8.24723e-10	5.3662e-07	ENSMUSG00000119984	1.18492	4.99402	45.8823	1.25576e-11	8.07454e-09	ENSMUSG00000087174	-0.484669	10.0159	47.0901	6.77978e-12	4.2803e-09	ENSMUSG00000087174	-0.969301	9.36295	38.3783	5.8277e-10	2.28446e-07	ENSMUSG00000087174	-0.776658	9.40665	37.3645	9.79915e-10	4.27243e-07	ENSMUSG00000087174	-0.693246	9.91263	24.667	6.81393e-07	0.000237275	ENSMUSG00000087174	-0.82685	9.38826	44.4301	2.63609e-11	1.16955e-08	ENSMUSG00000110494	7.3933
ENSMUSG00000101995	1.01171	5.13187	19.8519	8.36802e-06	0.00360452	ENSMUSG00000097571	-0.499876	8.54834	23.2857	1.39636e-06	0.000681423	ENSMUSG00000097571	-0.537233	8.32779	26.6855	2.39413e-07	0.000115457							ENSMUSG00000073535	1.12342	13.3842	32.5332	1.17173e-08	3.23141e-06	ENSMUSG00000116656	0.713167	10.9522	15.053	0.000104534	0.0341825	ENSMUSG00000086370	-0.52209	9.5355	24.3228	8.14679e-07	0.000237275	ENSMUSG00000120803	0.558476	10.9319	18.7629	1.48018e-05	0.00492531	ENSMUSG00000110216	-5.74225
ENSMUSG00000086652	-1.04434	5.18973	18.9714	1.32692e-05	0.00457255	ENSMUSG00000116305	0.391813	9.23185	19.5753	9.67136e-06	0.0037757	ENSMUSG00000119961	-0.690009	5.71093	20.5315	5.8657e-06	0.00192133							ENSMUSG00000010492	1.37876	8.52361	32.2239	1.3739e-08	3.23141e-06	ENSMUSG00000079499	0.74228	7.70895	14.5015	0.000140048	0.0366366	ENSMUSG00000117254	-1.1779	7.33868	22.1982	2.45899e-06	0.000572946	ENSMUSG00000097571	-0.629319	8.57582	16.5136	4.83029e-05	0.0128582	ENSMUSG00000112713	9.64864
ENSMUSG00000105891	0.902109	7.31937	18.0374	2.16612e-05	0.00622038	ENSMUSG00000086308	0.446153	8.02519	14.6332	0.000130592	0.0424859	ENSMUSG00000087174	-0.476379	10.1169	20.4958	5.97614e-06	0.00192133							ENSMUSG00000021268	-0.685791	11.0541	31.4356	2.06171e-08	4.04095e-06							ENSMUSG00000091575	-1.20834	7.21211	15.5438	8.06137e-05	0.0156525	ENSMUSG00000010492	1.08383	7.82346	15.5341	8.10295e-05	0.0173667	ENSMUSG00000099669	3.49482
ENSMUSG00000087174	-0.408838	10.083	16.7823	4.19217e-05	0.00967493							ENSMUSG00000000031	-0.900398	6.05301	17.0782	3.58724e-05	0.00988541							ENSMUSG00000097571	-0.747219	9.05351	30.9619	2.63149e-08	4.42091e-06							ENSMUSG00000089663	0.959869	6.84137	14.7043	0.000125756	0.0209294	ENSMUSG00000086370	-0.528479	9.16365	15.3079	9.13349e-05	0.0173667	ENSMUSG00000110755	2.59454
ENSMUSG00000087445	-0.55425	6.94071	16.6512	4.49213e-05	0.00967493							ENSMUSG00000106951	-1.05475	9.10852	14.1381	0.000169868	0.0409594							ENSMUSG00000074987	-1.18098	8.02015	29.5741	5.38201e-08	7.91155e-06							ENSMUSG00000053214	0.575058	11.5667	13.6788	0.000216885	0.0315839	ENSMUSG00000021268	-0.431506	10.8892	14.5997	0.000132934	0.0221169	ENSMUSG00000114206	-5.70644
ENSMUSG00000086171	0.554518	8.11685	15.8039	7.02574e-05	0.0134504																			ENSMUSG00000089812	-1.13243	7.14343	25.8194	3.74893e-07	4.8986e-05													ENSMUSG00000097974	-0.588353	7.29991	13.9252	0.000190232	0.0281333	ENSMUSG00000100303	4.81789
ENSMUSG00000119984	0.60377	7.15181	15.3741	8.81868e-05	0.0151946																			ENSMUSG00000086370	-0.767673	9.53674	24.6274	6.95569e-07	8.17989e-05													ENSMUSG00000073535	0.623545	13.4818	12.8996	0.000328644	0.0437425	ENSMUSG00000090257	5.5123
																								ENSMUSG00000097451	-0.762805	10.2205	22.5195	2.08019e-06	0.000215412																			ENSMUSG00000115016	8.8482
																								ENSMUSG00000078640	-1.19199	7.35647	22.4136	2.19808e-06	0.000215412																			ENSMUSG00000098747	2.95169
																								ENSMUSG00000108435	0.8471	7.01046	22.0682	2.63127e-06	0.000238029																			ENSMUSG00000086071	5.77758
																								ENSMUSG00000085162	-0.977347	10.0821	20.7903	5.12407e-06	0.000417626																			ENSMUSG00000116543	-8.03674
																								ENSMUSG00000090778	0.882774	8.30802	20.6215	5.59644e-06	0.000417626																			ENSMUSG00000086156	4.0546
																								ENSMUSG00000085761	-1.65744	6.45298	20.5924	5.68198e-06	0.000417626																			ENSMUSG00000120875	3.60273
																								ENSMUSG00000087382	-1.4483	7.18678	20.1678	7.09386e-06	0.000490728																			ENSMUSG00000085620	-7.27074
																								ENSMUSG00000074807	0.661922	10.36	19.9903	7.78379e-06	0.000508541																			ENSMUSG00000111658	5.92253
																								ENSMUSG00000101655	0.668377	10.7713	19.6906	9.10495e-06	0.000551006																			ENSMUSG00000121353	-5.61105
																								ENSMUSG00000113216	-0.909276	11.1363	19.6356	9.37086e-06	0.000551006																			ENSMUSG00000120709	1.83582
																								ENSMUSG00000119984	0.636785	8.3471	18.7348	1.50215e-05	0.00084024																			ENSMUSG00000109849	3.77702
																								ENSMUSG00000107689	0.700304	12.2813	18.6483	1.57188e-05	0.00084024																			ENSMUSG00000109093	1.5856
																								ENSMUSG00000085180	-1.13586	8.67796	16.7523	4.25906e-05	0.00217768																			ENSMUSG00000101211	-7.23683
																								ENSMUSG00000120796	0.808872	8.74843	16.6537	4.48617e-05	0.00219822																			ENSMUSG00000120084	-2.21484
																								ENSMUSG00000097124	-1.46218	7.65961	15.7427	7.25672e-05	0.00341356																			ENSMUSG00000072999	-2.81661
																								ENSMUSG00000100599	0.597982	10.3425	15.6436	7.64692e-05	0.00345876																			ENSMUSG00000085826	1.33449
																								ENSMUSG00000090257	0.886438	6.38155	15.466	8.40032e-05	0.0036588																			ENSMUSG00000121494	-3.22159
																								ENSMUSG00000097777	-0.848969	6.52922	14.9715	0.000109149	0.00449477																			ENSMUSG00000085615	-1.80121
																								ENSMUSG00000114053	0.990262	7.05116	14.9425	0.00011084	0.00449477																			ENSMUSG00000100426	4.25395
																								ENSMUSG00000112980	-0.90929	7.39161	14.814	0.000118652	0.00457728																			ENSMUSG00000108884	2.76797
																								ENSMUSG00000120773	0.749028	9.97331	14.7824	0.00012066	0.00457728																			ENSMUSG00000100252	5.2028
																								ENSMUSG00000087179	-0.671376	7.81924	14.2257	0.000162141	0.00595746																			ENSMUSG00000114255	1.92533
																								ENSMUSG00000121145	-1.32197	11.8085	14.1557	0.000168283	0.00595746																			ENSMUSG00000084854	5.29403
																								ENSMUSG00000070315	-0.437856	9.50196	14.0715	0.000175989	0.00595746																			ENSMUSG00000085468	2.1502
																								ENSMUSG00000120678	-0.645284	10.8154	14.0575	0.000177305	0.00595746																			ENSMUSG00000099848	-7.35704
																								ENSMUSG00000086287	0.674923	7.75466	13.9481	0.000187926	0.00613892																			ENSMUSG00000044522	2.17001
																								ENSMUSG00000074466	0.446452	10.1797	13.7285	0.000211225	0.00671352																			ENSMUSG00000085541	-2.62864
																								ENSMUSG00000051606	-1.14963	9.68149	13.6201	0.000223776	0.00692528																			ENSMUSG00000097730	-2.17975
																								ENSMUSG00000115186	-0.809183	7.718	13.2621	0.000270823	0.00816635																			ENSMUSG00000106069	-4.00763
																								ENSMUSG00000117919	0.730212	9.19817	12.9277	0.000323759	0.00951851																			ENSMUSG00000119997	2.55885
																								ENSMUSG00000109754	0.567963	10.3825	12.8148	0.000343889	0.00986374																			ENSMUSG00000089744	2.26665
																								ENSMUSG00000091154	0.708947	6.86732	12.297	0.000453691	0.0127034																			ENSMUSG00000120468	4.40252
																								ENSMUSG00000116066	0.512183	11.1164	12.1159	0.000499942	0.0135092																			ENSMUSG00000095959	3.04612
																								ENSMUSG00000120803	0.632477	11.1562	12.0955	0.000505447	0.0135092																			ENSMUSG00000097766	-3.26305
																								ENSMUSG00000120322	0.680744	8.30711	12.0455	0.000519164	0.0135675																			ENSMUSG00000117879	-2.51958
																								ENSMUSG00000120143	0.830014	6.15216	11.7094	0.00062184	0.0154418																			ENSMUSG00000099146	4.73898
																								ENSMUSG00000087474	0.921358	6.81768	11.6866	0.00062952	0.0154418																			ENSMUSG00000086392	1.56962
																								ENSMUSG00000116506	0.736177	6.48131	11.6756	0.000633239	0.0154418																			ENSMUSG00000085412	-1.79054
																								ENSMUSG00000085379	-0.592595	8.62318	11.646	0.000643409	0.0154418																			ENSMUSG00000114441	-1.59987
																								ENSMUSG00000111867	0.891404	8.23367	11.6029	0.000658507	0.0154881																			ENSMUSG00000102432	-1.80721
																								ENSMUSG00000121503	-1.57381	6.84821	11.1407	0.000844549	0.0189595																			ENSMUSG00000120727	-3.38149
																								ENSMUSG00000107994	0.336279	10.2729	11.1228	0.000852717	0.0189595																			ENSMUSG00000015451	2.75768
																								ENSMUSG00000120754	-1.08928	7.67477	11.0904	0.000867762	0.0189595																			ENSMUSG00000106547	3.29477
																								ENSMUSG00000097379	-1.20187	6.88665	11.0844	0.000870589	0.0189595																			ENSMUSG00000112028	1.97119
																								ENSMUSG00000120555	0.698858	8.22978	10.96	0.000930993	0.0199063																			ENSMUSG00000115718	1.26368
																								ENSMUSG00000097910	-0.426173	10.2666	10.7578	0.00103843	0.0218071																			ENSMUSG00000121458	2.5494
																								ENSMUSG00000119959	0.399117	10.2364	10.6979	0.00107255	0.0221283																			ENSMUSG00000086765	2.62707
																								ENSMUSG00000119994	0.383657	10.7557	10.4279	0.00124123	0.025167																			ENSMUSG00000115762	1.56562
																								ENSMUSG00000056753	0.489416	7.91339	10.2895	0.00133786	0.0258748																			ENSMUSG00000117818	1.65058
																								ENSMUSG00000085786	-1.09638	7.78334	10.285	0.00134113	0.0258748																			ENSMUSG00000118280	-1.89128
																								ENSMUSG00000087624	-1.08893	6.41803	10.2631	0.00135717	0.0258748																			ENSMUSG00000101655	-1.52168
																								ENSMUSG00000121259	1.34746	7.06976	10.2357	0.0013775	0.0258748																			ENSMUSG00000074469	3.35958
																								ENSMUSG00000117879	1.14641	9.48133	10.2038	0.00140154	0.0258748																			ENSMUSG00000087341	-1.48795
																								ENSMUSG00000086320	-1.49661	8.00473	10.1951	0.00140815	0.0258748																			ENSMUSG00000115099	1.51316
																								ENSMUSG00000089706	-0.635444	7.87217	9.83513	0.0017121	0.0309759																			ENSMUSG00000121505	2.2821
																								ENSMUSG00000113940	0.653129	6.4352	9.79985	0.00174526	0.0310973																			ENSMUSG00000108483	1.16263
																								ENSMUSG00000085438	0.347229	15.7778	9.72943	0.0018134	0.0317405																			ENSMUSG00000115888	-4.19773
																								ENSMUSG00000097378	-0.873846	6.43542	9.70734	0.00183534	0.0317405																			ENSMUSG00000110874	-1.40723
																								ENSMUSG00000098204	-1.0659	6.19853	9.63324	0.00191087	0.0325679																			ENSMUSG00000120362	1.01183
																								ENSMUSG00000120315	-0.59468	7.99007	9.5825	0.00196441	0.032852																			ENSMUSG00000121280	1.32348
																								ENSMUSG00000087187	-0.97481	7.09361	9.56482	0.00198341	0.032852																			ENSMUSG00000085828	-1.48761
																								ENSMUSG00000101599	-0.416524	9.32926	9.50699	0.0020469	0.0334328																			ENSMUSG00000046840	0.919223
																								ENSMUSG00000121498	0.700861	8.33585	9.35391	0.0022251	0.0358455																			ENSMUSG00000108652	1.21915
																								ENSMUSG00000085517	-0.913808	6.55054	9.20132	0.00241841	0.0376212																			ENSMUSG00000114828	1.82857
																								ENSMUSG00000097974	-0.640711	7.56381	9.20046	0.00241954	0.0376212																			ENSMUSG00000120104	0.85221
																								ENSMUSG00000106978	-0.439682	8.58381	9.19159	0.0024313	0.0376212																			ENSMUSG00000097927	2.19271
																								ENSMUSG00000075585	0.382831	11.7537	9.06495	0.00260555	0.0397939																			ENSMUSG00000085604	-1.73322
																								ENSMUSG00000119968	-0.479237	7.60111	8.90451	0.00284467	0.0428889																			ENSMUSG00000097613	2.01087
																								ENSMUSG00000099632	0.560526	7.41372	8.84388	0.00294074	0.0433231																			ENSMUSG00000085148	0.719597
																								ENSMUSG00000101386	0.727104	6.4584	8.8399	0.00294715	0.0433231																			ENSMUSG00000112275	4.12168
																								ENSMUSG00000087523	0.462113	9.4518	8.70316	0.00317658	0.0461193																			ENSMUSG00000121004	1.79906
																								ENSMUSG00000120047	0.936763	10.4339	8.58046	0.00339789	0.0486257																			ENSMUSG00000113598	-1.5254
																								ENSMUSG00000116056	-0.369252	9.59194	8.56232	0.00343192	0.0486257																			ENSMUSG00000099413	-0.884394
																								ENSMUSG00000096948	-0.785159	6.80086	8.53653	0.00348088	0.0487324																			ENSMUSG00000085873	-1.15437
																																																ENSMUSG00000111334	-1.15458
																																																ENSMUSG00000097063	-1.07817
																																																ENSMUSG00000118132	1.05649
																																																ENSMUSG00000089804	-0.814331
																																																ENSMUSG00000101514	-1.23347
																																																ENSMUSG00000098183	0.924668
																																																ENSMUSG00000031294	0.841472
																																																ENSMUSG00000044276	-1.73372
																																																ENSMUSG00000112189	1.41871
																																																ENSMUSG00000115190	2.46302
																																																ENSMUSG00000087336	1.75742
																																																ENSMUSG00000112466	-1.3467
																																																ENSMUSG00000115750	1.61919
																																																ENSMUSG00000121129	0.99147
																																																ENSMUSG00000119986	0.868568
																																																ENSMUSG00000086213	0.888575
																																																ENSMUSG00000108714	1.30528
																																																ENSMUSG00000070574	1.0432
																																																ENSMUSG00000097882	1.10741
																																																ENSMUSG00000086711	0.939308
																																																ENSMUSG00000110652	-0.61849
																																																ENSMUSG00000085645	-0.740385
																																																ENSMUSG00000086054	1.23746
																																																ENSMUSG00000110980	-1.023
																																																ENSMUSG00000106107	-1.47375
																																																ENSMUSG00000120914	1.22051
																																																ENSMUSG00000118030	-1.1625
																																																ENSMUSG00000106019	-0.926052
																																																ENSMUSG00000092220	-1.46554
																																																ENSMUSG00000089712	1.24131
																																																ENSMUSG00000114613	0.594111
																																																ENSMUSG00000120551	0.933223
																																																ENSMUSG00000110866	1.91539
																																																ENSMUSG00000086600	0.703991
																																																ENSMUSG00000114800	1.23869
																																																ENSMUSG00000120952	-1.28402
																																																ENSMUSG00000052248	0.875266
																																																ENSMUSG00000120212	1.61573
																																																ENSMUSG00000116840	0.873568
																																																ENSMUSG00000114430	1.22271
																																																ENSMUSG00000074912	-0.803973
																																																ENSMUSG00000074039	1.43463
																																																ENSMUSG00000097673	1.50874
																																																ENSMUSG00000101746	1.89416
																																																ENSMUSG00000101517	-0.642368
																																																ENSMUSG00000104607	3.03876
																																																ENSMUSG00000085121	-1.88257
																																																ENSMUSG00000097724	1.02055
																																																ENSMUSG00000087135	1.94191
																																																ENSMUSG00000117823	-0.865868
																																																ENSMUSG00000118239	0.594132
																																																ENSMUSG00000120885	0.62815
																																																ENSMUSG00000120969	0.805751
																																																ENSMUSG00000108236	-1.06569
																																																ENSMUSG00000120868	1.3562
																																																ENSMUSG00000105961	1.03792
																																																ENSMUSG00000089671	-0.961254
																																																ENSMUSG00000086810	-1.4507
																																																ENSMUSG00000113831	-0.664419
																																																ENSMUSG00000120481	1.19534
																																																ENSMUSG00000043168	-0.665934
																																																ENSMUSG00000121375	-1.05128
																																																ENSMUSG00000116116	-0.832311
																																																ENSMUSG00000087352	-0.896384
																																																ENSMUSG00000121023	0.983105
																																																ENSMUSG00000060424	-0.607171
																																																ENSMUSG00000085936	-0.759459
																																																ENSMUSG00000121376	0.74665
																																																ENSMUSG00000102476	1.49858
																																																ENSMUSG00000120160	-1.15309
																																																ENSMUSG00000109478	1.00034
																																																ENSMUSG00000085355	0.816696
																																																ENSMUSG00000116288	-1.04819
																																																ENSMUSG00000073752	0.868772
																																																ENSMUSG00000111063	-0.720612
																																																ENSMUSG00000086495	-0.793148
																																																ENSMUSG00000108207	0.819564
																																																ENSMUSG00000120316	0.855822
																																																ENSMUSG00000087519	0.719854
																																																ENSMUSG00000074284	0.797755
																																																ENSMUSG00000101450	0.83511
																																																ENSMUSG00000075549	-0.79959
																																																ENSMUSG00000109108	0.72778
																																																ENSMUSG00000120004	-0.888556
																																																ENSMUSG00000085307	0.927612
																																																ENSMUSG00000120286	1.02648
																																																ENSMUSG00000085955	-0.942462
																																																ENSMUSG00000052951	-0.655402
																																																ENSMUSG00000086331	-1.07591
																																																ENSMUSG00000112366	0.968015
																																																ENSMUSG00000110830	0.599026
																																																ENSMUSG00000120018	1.08755
																																																ENSMUSG00000121485	1.03218
																																																ENSMUSG00000085379	0.547223
																																																ENSMUSG00000099681	-0.77869
																																																ENSMUSG00000110710	-1.34321
																																																ENSMUSG00000107481	-0.637371
																																																ENSMUSG00000087365	-0.654212
																																																ENSMUSG00000097413	-0.864562
																																																ENSMUSG00000112157	3.45773
																																																ENSMUSG00000085024	-0.722854
																																																ENSMUSG00000116810	-1.77962
																																																ENSMUSG00000086061	-1.2223
																																																ENSMUSG00000039563	-0.617634
																																																ENSMUSG00000117003	-1.16493
																																																ENSMUSG00000121114	0.661545
																																																ENSMUSG00000097887	-0.740912
																																																ENSMUSG00000085582	0.815618
																																																ENSMUSG00000054589	1.10314
																																																ENSMUSG00000075025	0.510645
																																																ENSMUSG00000085287	0.587367
																																																ENSMUSG00000084915	-0.577337
																																																ENSMUSG00000086075	0.644667
																																																ENSMUSG00000055833	0.670842
																																																ENSMUSG00000072884	-0.964788
																																																ENSMUSG00000096938	-0.904844
																																																ENSMUSG00000086243	-0.610512
																																																ENSMUSG00000107785	-1.34352
																																																ENSMUSG00000120315	-1.04589
																																																ENSMUSG00000085068	1.0904
																																																ENSMUSG00000108288	0.627114
																																																ENSMUSG00000121227	0.993445
																																																ENSMUSG00000118086	-0.934829
																																																ENSMUSG00000074178	0.78791
																																																ENSMUSG00000108431	0.998458
																																																ENSMUSG00000096917	1.27558
																																																ENSMUSG00000114452	-0.933067
																																																ENSMUSG00000085618	0.677081
																																																ENSMUSG00000089706	0.611891
																																																ENSMUSG00000087456	1.29178
																																																ENSMUSG00000087644	-0.922025
																																																ENSMUSG00000085551	-1.01267
																																																ENSMUSG00000079000	-0.927287
																																																ENSMUSG00000097537	-0.876215
																																																ENSMUSG00000085945	-0.497525
																																																ENSMUSG00000085175	0.479997
																																																ENSMUSG00000120121	-0.743805
																																																ENSMUSG00000075389	-0.500012
																																																ENSMUSG00000044062	-0.760932
																																																ENSMUSG00000098447	0.618146
																																																ENSMUSG00000059027	0.608141
																																																ENSMUSG00000120209	0.718851
																																																ENSMUSG00000085192	1.02882
																																																ENSMUSG00000087380	0.559033
																																																ENSMUSG00000116097	-0.980008
																																																ENSMUSG00000102112	0.637606
																																																ENSMUSG00000074987	-0.615441
																																																ENSMUSG00000113669	1.23178
																																																ENSMUSG00000097589	0.392601
																																																ENSMUSG00000121059	-0.654436
																																																ENSMUSG00000078706	-0.429357
																																																ENSMUSG00000119989	0.506015
																																																ENSMUSG00000086474	1.21963
																																																ENSMUSG00000099338	0.458474
																																																ENSMUSG00000113800	-0.871789
																																																ENSMUSG00000121260	0.681842
																																																ENSMUSG00000097858	-1.13881
																																																ENSMUSG00000075534	-0.519827
																																																ENSMUSG00000079602	-0.713265
																																																ENSMUSG00000075416	-0.749198
																																																ENSMUSG00000079669	-0.698922
																																																ENSMUSG00000061510	-0.791618
																																																ENSMUSG00000120792	-0.800208
																																																ENSMUSG00000085457	-0.715234
																																																ENSMUSG00000085133	-0.52151
																																																ENSMUSG00000087445	-0.710749
																																																ENSMUSG00000097383	0.360454
																																																ENSMUSG00000104340	-1.2389
																																																ENSMUSG00000084910	-0.455212
																																																ENSMUSG00000087174	-0.446159
																																																ENSMUSG00000085881	-0.845211
																																																ENSMUSG00000105834	0.704659
																																																ENSMUSG00000097692	0.657651
																																																ENSMUSG00000110834	0.476978
																																																ENSMUSG00000114771	-0.67032
																																																ENSMUSG00000120684	0.994138
																																																ENSMUSG00000085860	-0.897769
																																																ENSMUSG00000097924	-0.670875
																																																ENSMUSG00000121096	-0.511874
																																																ENSMUSG00000115767	-0.68143
																																																ENSMUSG00000086589	0.937743
																																																ENSMUSG00000053117	-0.738775
																																																ENSMUSG00000117485	0.800657
																																																ENSMUSG00000085039	-0.568026
																																																ENSMUSG00000097124	-0.63523
																																																ENSMUSG00000097209	-0.5408
																																																ENSMUSG00000120359	0.617936
																																																ENSMUSG00000097017	-0.866067
																																																ENSMUSG00000109992	-0.638212
																																																ENSMUSG00000097636	0.878547
																																																ENSMUSG00000119992	-0.760007
																																																ENSMUSG00000117901	-0.851634
																																																ENSMUSG00000105265	1.91419
																																																ENSMUSG00000085971	1.15119
																																																ENSMUSG00000087516	-0.791679
																																																ENSMUSG00000097119	0.437348
																																																ENSMUSG00000116852	0.702287
																																																ENSMUSG00000086140	0.84509
																																																ENSMUSG00000097251	-0.489078
																																																ENSMUSG00000087590	-0.465643
																																																ENSMUSG00000113527	-0.686027
																																																ENSMUSG00000097113	-0.511951
																																																ENSMUSG00000074466	0.435322
																																																ENSMUSG00000104610	-0.621354
																																																ENSMUSG00000085923	0.631773
																																																ENSMUSG00000097494	0.855879
																																																ENSMUSG00000066057	0.50734
																																																ENSMUSG00000103965	1.32011
																																																ENSMUSG00000092071	-0.529175
																																																ENSMUSG00000095562	-1.84335
																																																ENSMUSG00000121028	0.502946
																																																ENSMUSG00000117123	-0.818457
																																																ENSMUSG00000097146	-1.01037
																																																ENSMUSG00000113204	0.477026
																																																ENSMUSG00000091623	-0.512657
																																																ENSMUSG00000025783	-0.597912
																																																ENSMUSG00000120081	0.64627
																																																ENSMUSG00000097762	-0.576141
																																																ENSMUSG00000086013	-0.515138
																																																ENSMUSG00000052673	0.538367
																																																ENSMUSG00000097187	-0.543319
																																																ENSMUSG00000101089	-0.68581
																																																ENSMUSG00000093587	-0.471663
																																																ENSMUSG00000116993	0.437653
																																																ENSMUSG00000121232	1.57894
																																																ENSMUSG00000120310	0.635381
																																																ENSMUSG00000104222	0.572484
																																																ENSMUSG00000043773	-0.621023
																																																ENSMUSG00000097709	-0.614734
																																																ENSMUSG00000120569	0.940614
																																																ENSMUSG00000121482	-0.859976
																																																ENSMUSG00000085492	0.374579
																																																ENSMUSG00000097092	-0.707158
																																																ENSMUSG00000085317	0.736139
																																																ENSMUSG00000101013	0.319581
																																																ENSMUSG00000120543	1.07187
																																																ENSMUSG00000070315	-0.394458
																																																ENSMUSG00000102101	0.437247
																																																ENSMUSG00000093677	-0.593253
																																																ENSMUSG00000120265	-0.817413
																																																ENSMUSG00000113883	-0.550623
																																																ENSMUSG00000113425	-0.529882
																																																ENSMUSG00000114524	0.726373
																																																ENSMUSG00000066175	-0.469235
																																																ENSMUSG00000121492	0.463812
																																																ENSMUSG00000120766	-0.530072
																																																ENSMUSG00000120343	0.693045
																																																ENSMUSG00000107726	-0.437528
																																																ENSMUSG00000120472	1.0412
																																																ENSMUSG00000110156	0.453327
																																																ENSMUSG00000120367	0.641608
																																																ENSMUSG00000120138	-0.71327
																																																ENSMUSG00000107640	1.21635
																																																ENSMUSG00000097287	-0.398504
																																																ENSMUSG00000085151	-0.748483
																																																ENSMUSG00000117859	-0.851601
																																																ENSMUSG00000120023	-0.576538
																																																ENSMUSG00000096948	-0.696816
																																																ENSMUSG00000072660	0.480911
																																																ENSMUSG00000112813	0.715158
																																																ENSMUSG00000085702	-0.540437
																																																ENSMUSG00000116858	0.394997
																																																ENSMUSG00000117634	-0.395386
																																																ENSMUSG00000120241	0.377968
																																																ENSMUSG00000120414	-0.396671
																																																ENSMUSG00000097767	0.820946
																																																ENSMUSG00000087142	0.695841
																																																ENSMUSG00000117869	-0.351503
																																																ENSMUSG00000045746	0.544606
																																																ENSMUSG00000119984	0.607184
																																																ENSMUSG00000087658	-0.41378
																																																ENSMUSG00000090622	-0.527688
																																																ENSMUSG00000066170	1.24043
																																																ENSMUSG00000086794	-1.02405
																																																ENSMUSG00000117814	-0.34437
																																																ENSMUSG00000104830	0.627272
																																																ENSMUSG00000095193	0.534309
																																																ENSMUSG00000099137	-0.79056
																																																ENSMUSG00000052188	0.71641
																																																ENSMUSG00000085213	0.655833
																																																ENSMUSG00000084790	0.383107
																																																ENSMUSG00000092384	0.46762
																																																ENSMUSG00000086645	1.00423
																																																ENSMUSG00000120340	0.47272
																																																ENSMUSG00000097503	1.00229
																																																ENSMUSG00000121107	-0.428322
																																																ENSMUSG00000111014	-0.801436
																																																ENSMUSG00000097534	-0.462323
																																																ENSMUSG00000109532	-1.22452
																																																ENSMUSG00000072683	-0.835266
																																																ENSMUSG00000105957	-0.310989
																																																ENSMUSG00000115220	-0.470329
																																																ENSMUSG00000037982	0.473595
																																																ENSMUSG00000085204	-0.685618
																																																ENSMUSG00000100975	-0.697259
																																																ENSMUSG00000097101	0.342082
																																																ENSMUSG00000086283	-0.476711
																																																ENSMUSG00000098720	-0.645348
																																																ENSMUSG00000113209	-0.555115
																																																ENSMUSG00000120999	0.407351
																																																ENSMUSG00000097405	-0.481657
																																																ENSMUSG00000084843	-0.953671
																																																ENSMUSG00000115249	0.602326
																																																ENSMUSG00000085282	-0.66762
																																																ENSMUSG00000120187	-0.841654
																																																ENSMUSG00000085069	-0.321666
																																																ENSMUSG00000097820	-0.459119
																																																ENSMUSG00000120051	-0.501593
																																																ENSMUSG00000097893	0.462105
																																																ENSMUSG00000021268	-1.00428
																																																ENSMUSG00000105851	-0.357298
																																																ENSMUSG00000100213	-0.41038
																																																ENSMUSG00000120660	-0.641551
																																																ENSMUSG00000097184	-0.613291
																																																ENSMUSG00000053714	0.444724
																																																ENSMUSG00000097195	-0.353388
																																																ENSMUSG00000097643	0.861909
																																																ENSMUSG00000056687	0.366799
																																																ENSMUSG00000086610	-0.424336
																																																ENSMUSG00000120923	0.647276
																																																ENSMUSG00000105161	-0.428436
																																																ENSMUSG00000086746	0.393333
																																																ENSMUSG00000120742	-0.488791
																																																ENSMUSG00000121184	0.452513
																																																ENSMUSG00000096981	-0.584499
																																																ENSMUSG00000111225	-0.896432
																																																ENSMUSG00000115333	0.520993
																																																ENSMUSG00000113346	-0.483872
																																																ENSMUSG00000111828	-0.43876
																																																ENSMUSG00000116114	-0.38703
																																																ENSMUSG00000120717	-0.459296
																																																ENSMUSG00000097415	-0.668357
																																																ENSMUSG00000084880	-0.485057
																																																ENSMUSG00000087613	-0.388351
																																																ENSMUSG00000110781	0.695436
																																																ENSMUSG00000117465	-1.29673
																																																ENSMUSG00000120188	-0.519177
																																																ENSMUSG00000111329	-0.528787
																																																ENSMUSG00000113455	-0.694374
																																																ENSMUSG00000103676	-0.7331
																																																ENSMUSG00000121021	-0.57198
																																																ENSMUSG00000112793	-0.756903
																																																ENSMUSG00000087400	-0.424271
																																																ENSMUSG00000120403	-0.996844
																																																ENSMUSG00000071456	0.442182
																																																ENSMUSG00000096935	0.376802
																																																ENSMUSG00000097318	0.462163
																																																ENSMUSG00000097683	-0.663887
																																																ENSMUSG00000114780	-0.536658
																																																ENSMUSG00000105655	0.43632
																																																ENSMUSG00000114602	0.799207
																																																ENSMUSG00000115946	0.435973
																																																ENSMUSG00000078648	-0.535931
																																																ENSMUSG00000087305	0.418482
[truncated: 142 more columns]
