# Supplementary material for: Population level analyses reveal contrasting landscapes of gene expression divergence and evolution between male and female transcriptome lineages in the house mouse
Source: Research Square preprint supplement (doi:10.21203/rs.3.rs-6634316/v1), 2025-05-22
Supplement: Supplementary file 8 [file cc899f36e969fb03d307ebe4.xlsx]

## Sheet: Data_S2
Supplementary Data S2. Summary information of the number of genes with expression. Gene with expression was defined as FPKM > 0. For each organ and each sex, the average and standard deviation (SD) value of the numbers of expressed genes from all the individuals within the same category were presented. The statistical significance (p-value) between somatic organs and gonal organs was computed usi…
Species	Subspecies	Population	Sex	Gene type	Somatic organ					Gonadal organ
					Brain	Heart	Kidney	Liver	Mammary gland	Epididymus	Testis	Vas deferens	Uterus	Ovary	Oviduct
Mus musculus	M.m.dom	FR	Male	Number of protein coding gene (FPKM>0)	16,918 (SD:223)	15,773 (SD:157)	16,138 (SD:91)	14,612 (SD:129)	16,253 (SD:210)	17,301 (SD:179)	18,318 (SD:69)	16892 (SD:181)	-	-	-
				Number of lncRNA gene (FPKM>0)	4,781 (SD:133)	3,589 (SD:236)	3,905 (SD:150)	2,728 (SD:91)	4479 (SD:299)	5,127 (SD:299)	7,312 (SD:91)	4,784 (SD:222)	-	-	-
			Female	Number of protein coding gene (FPKM>0)	17,000 (SD:130)	16,160 (SD:255)	16,492 (SD:139)	14,817 (SD:173)	16,434 (SD:295)	-	-	-	16,619 (SD:240)	16,971 (SD:201)	17,142 (SD:177)
				Number of lncRNA gene (FPKM>0)	5,120 (SD:140)	3,946 (SD:315)	4,373 (SD:224)	3,003 (SD:247)	4,575 (SD:439)	-	-	-	4,563 (SD:431)	4,811 (SD:324)	5,098 (SD:273)
Mus musculus	M.m.mus	KA	Male	Number of protein coding gene (FPKM>0)	16,990 (SD:128)	16,112 (SD:435)	16,241 (SD:650)	14,935 (SD:560)	16346 (SD:577)	17465 (SD:244)	17,929 (SD:551)	16,836 (SD:412)	-	-	-
				Number of lncRNA gene (FPKM>0)	5,040 (SD:190)	3,883 (SD:478)	3,917 (SD:798)	2,924 (SD:372)	4,379 (SD:668)	5,235 (SD:416)	6,615 (SD:743)	4,399 (SD:516)	-	-	-
			Female	Number of protein coding gene (FPKM>0)	17,197 (SD:156)	15,923 (SD:424)	16,630 (SD:391)	15,326 (SD:374)	16,692 (SD:275)	-	-	-	16,630 (SD:342)	17,205 (SD:178)	17,025 (SD:441)
				Number of lncRNA gene (FPKM>0)	5,355 (SD:294)	3,640 (SD:574)	4,434 (SD:466)	3,294 (SD:291)	4,655 (SD:451)	-	-	-	4,410 (SD:594)	5,053 (SD:267)	4,762 (SD:518)
Mus spretus	-	SP	Female	Number of protein coding gene (FPKM>0)	17,143 (SD:123)	15,917 (SD:208)	16,617 (SD:273)	15,250 (SD:424)	16281 (SD:256)	17,391 (SD:541)	18,064 (SD:401)	17,218 (SD:177)	-	-	-
				Number of lncRNA gene (FPKM>0)	4,965 (SD:207)	3,572 (SD:290)	4,330 (SD:456)	3,010 (SD:230)	4,070 (SD:356)	5,111 (SD:688)	6,384 (SD:530)	4,684 (SD:148)	-	-	-
			Male	Number of protein coding gene (FPKM>0)	17,202 (SD:186)	16,050 (SD:304)	16,605 (SD:279)	15,156 (SD:550)	16,509 (SD:206)	-	-	-	17,013 (SD:203)	17,123 (SD:323)	17,414 (SD:299)
				Number of lncRNA gene (FPKM>0)	5,001 (SD:289)	3,586 (SD:263)	4,326 (SD:442)	2,891 (SD:397)	4,169 (SD:366)	-	-	-	4,734 (SD:394)	4,634 (SD:357)	5,299 (SD:421)
Statistics on the comparison between somatic and gonadal organs
		Male			Female
		Average	SD	p-value (Gonadal vs Somatic)	Average	SD	p-value (Gonadal vs Somatic)
Protein-coding genes	Somatic organ	16101.7	726.477	5e-05	16279.5	718.975	0.006
	Gonadal organ	17490.4	513.959		17016	257.687
lncRNA genes	Somatic organ	3971.47	718.879	0.0001	4157.87	754.359	0.02
	Gonadal organ	5516.78	1003.55		4821.67	277.902
