# Supplementary material for: Population level analyses reveal contrasting landscapes of gene expression divergence and evolution between male and female transcriptome lineages in the house mouse
Source: Research Square preprint supplement (doi:10.21203/rs.3.rs-6634316/v1), 2025-05-22
Supplement: Supplementary file 9 [file e3207357a12f40c20db29366.xlsx]

## Sheet: Data S3A
Supplementary Data S3A. Summary information of transcriptomic distances based on the first transcriptomic dataset. Transcriptomic distance was calculated as 1−Spearman’s ρ between the gene expression profiles of two groups. Highlighted are the fold-changes of transcriptomic distances between two groups to compare.
Organ	Comparison type	Transcriptomic distance (Protein-coding gene)			Transcriptomic distance (lncRNA gene)
		Male	Female	Fold-change (Male vs Female)	Male	Female	Fold-change (Male vs Female)
Brain	Inter-subspecies	0.00872305	0.0086987	1.0028	0.0646472	0.0659993	0.979513
	Inter-species	0.0115258	0.0115737	0.995855	0.0821267	0.085636	0.959021
Heart	Inter-subspecies	0.0159548	0.0187755	0.849764	0.0605837	0.0643619	0.941297
	Inter-species	0.022118	0.0219222	1.00893	0.0823594	0.086021	0.957434
Kidney	Inter-subspecies	0.0187422	0.0163401	1.14701	0.0589965	0.0603497	0.977577
	Inter-species	0.0277731	0.0252869	1.09832	0.094972	0.0926543	1.02501
Liver	Inter-subspecies	0.0208678	0.0187213	1.11466	0.0491594	0.051085	0.962304
	Inter-species	0.0287861	0.0278914	1.03208	0.0748193	0.0796165	0.939746
Mammary	Inter-subspecies	0.0203871	0.0221958	0.91851	0.0679755	0.0698432	0.973258
	Inter-species	0.0238978	0.0229024	1.04346	0.0937388	0.0952661	0.983968
Epi-Ute	Inter-subspecies	0.0210001	0.0148542	1.41374	0.0757175	0.0653612	1.15845
	Inter-species	0.0292798	0.0220921	1.32535	0.0992008	0.0895113	1.10825
Tes-Ova	Inter-subspecies	0.0247816	0.0166648	1.48706	0.113366	0.0693774	1.63404
	Inter-species	0.0385899	0.0237984	1.62153	0.158962	0.093776	1.69512
Vas-Ovi	Inter-subspecies	0.0200194	0.0200133	1.00031	0.0711644	0.0744213	0.956237
	Inter-species	0.02795	0.0282836	0.988204	0.096848	0.106575	0.908727
Summary on the average transcriptomic distance values of each comparison group.
Comparison type	Average transcriptomic distance (Protein-coding gene)		Average transcriptomic distance (lncRNA gene)		lncRNA vs protein-coding
	Male	Female	Male	Female	Male	Female
Inter-subspecies	0.0188095	0.017033	0.0702012	0.0650999	3.73222	3.82199
Inter-species	0.0262401	0.0229689	0.0978783	0.0911321	3.73011	3.96763
Inter-species vs inter-subspecies	1.39504	1.34849	1.39425	1.39988

## Sheet: Data S3B
Supplementary Data S3B. Summary information of transcriptomic distances based on the second transcriptomic dataset. Transcriptomic distance was calculated as 1−Spearman’s ρ between the gene expression profiles of two groups. Highlighted are the fold-changes of transcriptomic distances between two groups to compare.
Organ	Comparison type	Transcriptomic distance (Protein-coding gene)	Transcriptomic distance (lncRNA gene)	Fold-change (lncRNA gene vs protein-coding gene)
Brain	FR vs GE	0.00325954	0.0193384	5.93285
	FR-GE vs IR	0.00351188	0.0169676	4.83149
Heart	FR vs GE	0.00619718	0.0157258	2.53757
	FR-GE vs IR	0.00578454	0.0138269	2.39032
Kidney	FR vs GE	0.00551894	0.0168476	3.05268
	FR-GE vs IR	0.00475983	0.0144398	3.03369
Liver	FR vs GE	0.00777125	0.0165781	2.13326
	FR-GE vs IR	0.00624656	0.0135612	2.17098
Testis	FR vs GE	0.00602724	0.0210028	3.48464
	FR-GE vs IR	0.00567343	0.0208508	3.67516
Gut	FR vs GE	0.00651766	0.0230591	3.53794
	FR-GE vs IR	0.00688983	0.0173345	2.51595
Lung	FR vs GE	0.0129904	0.0334427	2.57443
	FR-GE vs IR	0.00602306	0.0198959	3.30329
Muscle	FR vs GE	0.00957818	0.0176581	1.84357
	FR-GE vs IR	0.00564038	0.0135971	2.41067
Spleen	FR vs GE	0.00817117	0.0220831	2.70256
	FR-GE vs IR	0.0101439	0.0225497	2.22298
Thyroid	FR vs GE	0.00534205	0.0146576	2.74382
	FR-GE vs IR	0.00536969	0.0138665	2.58236
Summary on the average transcriptomic distance values of each comparison group.
Comparison type	Average transcriptomic distance (Protein-coding gene)	Average transcriptomic distance (lncRNA gene)	Fold-change (lncRNA gene vs protein-coding gene)
FR vs GE	0.00713736	0.0200393	2.80767
FR-GE vs IR	0.00600431	0.016689	2.7795
(FR-GE vs IR) vs (FR vs GE)	0.841251	0.832812
